# Supplementary material
Source: PubMed Central journal article supplement (PMC4846294)
Supplement: NIHMS757091-supplement-Supporting_Info.pdf [file NIHMS757091-supplement-Supporting_Info.pdf]

# Design, Synthesis, and Biological Evaluation of Water-Soluble Amino Acid Prodrug Conjugates Derived from Combretastatin, Dihydronaphthalene, and Benzosuberene-Based Parent Vascular Disrupting Agents

Laxman Devkota<sup>a,†</sup>, Chen-Ming Lin<sup>a,†</sup>, Tracy E. Strecker<sup>a</sup>, Yifan Wang<sup>a</sup>, Justin K. Tidmore<sup>a</sup>, Zhi Chen<sup>a</sup>, Rajsekhar Guddneppanavar<sup>a</sup>, Christopher J. Jelinek<sup>a</sup>, Ramona Lopez<sup>b</sup>, Li Liu<sup>b</sup>, Ernest Hamel<sup>c</sup>, Ralph P. Mason<sup>b</sup>, David J. Chaplin<sup>a,d</sup>, Mary Lynn Trawick<sup>a,\*</sup>, and Kevin G. Pinney<sup>a,\*</sup>

<sup>a</sup> Department of Chemistry and Biochemistry, Baylor University, One Bear Place #97348, Waco, Texas 76798-7348, United States

<sup>b</sup> Department of Radiology, The University of Texas Southwestern Medical Center, 5323 Harry Hines Boulevard, Dallas, Texas 75390-9058, United States

<sup>c</sup> Screening Technologies Branch, Developmental Therapeutics Program, Division of Cancer Treatment and Diagnosis, National Cancer Institute, Frederick National Laboratory for Cancer Research, National Institutes of Health, Frederick, MD 21702, United States

<sup>d</sup> OXiGENE Inc., 701 Gateway Boulevard, Suite 210, South San Francisco, California 94080, United States

\*Co-corresponding authors. Tel.: +1 254 710 4117; Kevin\_Pinney@baylor.edu and Tel.: +1 254 710 6857; Mery\_Lynn\_Trawick@baylor.edu

†Authors contributed equally

## Table of Contents

|                                                    |           |
|----------------------------------------------------|-----------|
| Synthetic Scheme of AVE8062                        | S1        |
| Experimental Procedure of the Synthesis of AVE8062 | S1-S4     |
| NMR, HRMS, and HPLC data:                          |           |
| Compound 1                                         | S5-S6     |
| Compound 2                                         | S7-S8     |
| Compound 4                                         | S9-S10    |
| Compound 5a                                        | S11-S12   |
| Compound 5b                                        | S13-S14   |
| Compound 6a                                        | S15-S16   |
| Compound 6b                                        | S17-S18   |
| Compound 7                                         | S19-S26   |
| Compound 8                                         | S27-S34   |
| Compound 9                                         | S35-S42   |
| Compound 10                                        | S43-S50   |
| Compound 11                                        | S51-S52   |
| Compound 12                                        | S53-S54   |
| Compound 13                                        | S55-S62   |
| Compound 14                                        | S63-S71   |
| Compound 15                                        | S72-S79   |
| Compound 16                                        | S80-S87   |
| Compound 17                                        | S88-S95   |
| Compound 18                                        | S96-S103  |
| Compound 19                                        | S104-S105 |
| Compound 20                                        | S106-S107 |
| Compound 21                                        | S108-S109 |
| Compound 22                                        | S110-S117 |
| Compound 23                                        | S118-S125 |
| Compound 24                                        | S126-S133 |
| Compound 25                                        | S134-S135 |
| Compound 27                                        | S136-S137 |
| Compound 28                                        | S138-S139 |

|                                                                                                              |                  |
|--------------------------------------------------------------------------------------------------------------|------------------|
| Compound <b>29</b>                                                                                           | <b>S140-S141</b> |
| Compound <b>30</b>                                                                                           | <b>S142-S143</b> |
| Compound <b>31</b>                                                                                           | <b>S144-S145</b> |
| Compound <b>32</b>                                                                                           | <b>S146-S151</b> |
| Compound <b>33</b>                                                                                           | <b>S152-S159</b> |
| Compound <b>34</b>                                                                                           | <b>S160-S161</b> |
| Compound <b>35</b>                                                                                           | <b>S162-S163</b> |
| Compound <b>36</b>                                                                                           | <b>S164-S171</b> |
| Compound <b>37</b>                                                                                           | <b>S172-S177</b> |
| Compound <b>38</b>                                                                                           | <b>S178-S184</b> |
| Compound <b>39</b>                                                                                           | <b>S185-S191</b> |
| Compound <b>40</b>                                                                                           | <b>S192-S193</b> |
| Compound <b>41</b>                                                                                           | <b>S194-S195</b> |
| Compound <b>42</b>                                                                                           | <b>S196-S202</b> |
| Compound <b>43</b>                                                                                           | <b>S203-S212</b> |
| Compound <b>44</b>                                                                                           | <b>S213-S219</b> |
| Compound <b>45</b>                                                                                           | <b>S220-S227</b> |
| Compound <b>46</b>                                                                                           | <b>S228-S229</b> |
| Compound <b>3' CA4-amine</b>                                                                                 | <b>S230-S237</b> |
| Compound <b>47</b>                                                                                           | <b>S238-S239</b> |
| Compound <b>3' CA4-L-serinamide</b>                                                                          | <b>S240-S247</b> |
| Compound <b>AVE8062</b>                                                                                      | <b>S248-S255</b> |
| Enzyme Units Determination (Leucine Aminopeptidase):                                                         | <b>S256</b>      |
| HPLC Information for Enzymatic Assay                                                                         | <b>S257</b>      |
| HPLC Chromatograms of Compounds <b>7, 15</b> and <b>16</b>                                                   | <b>S257-S258</b> |
| HPLC Chromatograms of Compounds <b>15</b> and <b>16</b><br>Before and After Leucine Aminopeptidase Digestion | <b>S259</b>      |
| HPLC Chromatograms of Compounds <b>8, 22, 23</b> and <b>24</b>                                               | <b>S260</b>      |
| HPLC Chromatograms of Compounds <b>22</b> and <b>23</b><br>After Leucine Aminopeptidase Digestion            | <b>S261</b>      |
| HPLC Chromatograms of Compound <b>24</b>                                                                     |                  |

|                                                                                                                            |             |
|----------------------------------------------------------------------------------------------------------------------------|-------------|
| After Leucine Aminopeptidase Digestion                                                                                     | <b>S262</b> |
| HPLC Chromatograms of Compounds <b>17, 18</b><br>and of Their Parent Compound                                              | <b>S263</b> |
| HPLC Chromatograms of Compounds <b>17</b> and <b>18</b><br>Before and After Leucine Aminopeptidase Digestion               | <b>S264</b> |
| HPLC Chromatograms of Compounds <b>32, 38</b> and <b>44</b>                                                                | <b>S265</b> |
| HPLC Chromatograms of Compounds <b>38</b> and <b>44</b><br>Before and After Leucine Aminopeptidase Digestion               | <b>S266</b> |
| HPLC Chromatograms of Compounds <b>33, 39</b> and <b>45</b>                                                                | <b>S267</b> |
| HPLC Chromatograms of Compounds <b>39</b> and <b>45</b><br>Before and After Leucine Aminopeptidase Digestion               | <b>S268</b> |
| HPLC Chromatograms of 3' CA4-amine,<br>3' CA4- <i>L</i> -serinamide and <b>AVE8062</b>                                     | <b>S269</b> |
| HPLC Chromatograms of 3' CA4- <i>L</i> -serinamide and <b>AVE8062</b><br>Before and After Leucine Aminopeptidase Digestion | <b>S270</b> |
| Calibration Curves of Parent Compounds <b>7, 8, 32</b> and <b>33</b>                                                       | <b>S271</b> |
| Rate Studies for Cleavable Compounds <b>15, 16, 17, 18, 44</b> and <b>45</b>                                               | <b>S272</b> |
| Evaluation of Aqueous Solubility                                                                                           | <b>S273</b> |



## Synthesis of AVE8062

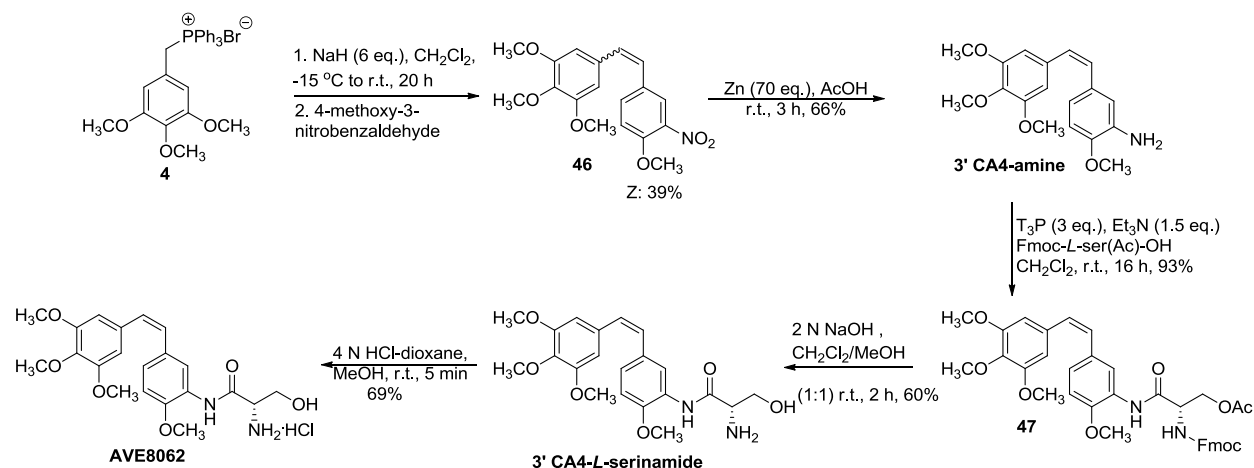

### Scheme. Synthesis of AVE8062

### Experimental Section for the Synthesis of AVE8062

#### (Z)-1,2,3-trimethoxy-5-(4-methoxy-3-nitrostyryl)benzene (**46**)

NaH (1.54 g, 64.2 mmol) was added into an oven-dried round-bottom reaction flask. Anhydrous CH<sub>2</sub>Cl<sub>2</sub> (100 mL) and 3,4,5-trimethoxybenzyltriphenylphosphonium bromide (6.94 g, 13.3 mmol) were added to the reaction flask, and the reaction mixture was stirred for 1 h. The reaction mixture was cooled to -15 °C, and 4-methoxy-3-nitrobenzaldehyde (2.01 g 11.1 mmol) was added to the reaction flask. The reaction mixture was stirred for 20 h while warming to ambient temperature under N<sub>2</sub>. Water (100 mL) was slowly added to the reaction, and the product was extracted with CH<sub>2</sub>Cl<sub>2</sub> (3 × 100 mL). The organic phase was rinsed with brine, dried with Na<sub>2</sub>SO<sub>4</sub>, and concentrated under reduced pressure, and the residue was purified by flash column chromatography using a pre-packed 100 g silica column [solvent A: EtOAc; solvent B: hexanes; gradient: 10%A / 90%B (1 CV), 10%A / 90%B → 70%A / 30%B (10 CV), 70%A / 30%B (5 CV); flow rate: 100 mL/min; monitored at 254 and 280 nm] affording 3' CA4-nitro **46** (1.51 g,

4.34 mmol, 39% yield) as a yellow solid. <sup>1</sup>H NMR (600 MHz, CDCl<sub>3</sub>) δ 7.80 (1H, d, *J*=2.0 Hz), 7.44 (1H, dd, *J*=8.7, 2.1 Hz), 6.95 (1H, d, *J*=8.7 Hz), 6.58 (1H, d, *J*=12.1 Hz), 6.47 (2H, s), 6.45 (1H, d, *J*=12.1 Hz), 3.94 (3H, s), 3.85 (3H, s), 3.72 (6H, s). <sup>13</sup>C NMR (150 MHz, CDCl<sub>3</sub>) δ 153.50, 152.00, 139.67, 137.89, 134.99, 132.12, 131.59, 129.97, 127.15, 126.29, 113.36, 106.03, 61.29, 56.88, 56.31.

**(*Z*)-2-methoxy-5-(3,4,5-trimethoxystyryl)aniline (3' CA4-amine)**

To a well-stirred solution of 3' CA4-nitro **46** (0.560 g, 1.78 mmol) in AcOH (40 mL), Zn (8.20 g, 125 mmol) was added, and the reaction mixture was stirred for 3 h at room temperature. The reaction was filtered using Celite<sup>®</sup>, and the Celite<sup>®</sup> was washed with EtOAc. The filtrate was concentrated under reduced pressure, and the residue was purified by flash column chromatography using a pre-packed 25 g silica column [solvent A: EtOAc; solvent B: hexanes; gradient: 7%A / 93%B (1 CV), 7%A / 93%B → 60%A / 40%B (15 CV), 60%A / 40%B (2 CV); flow rate: 75 mL/min; monitored at 254 and 280 nm] affording 3' CA4-amine (0.370 g, 1.17 mmol, 66% yield) as a brown solid. <sup>1</sup>H NMR (600 MHz, CDCl<sub>3</sub>) δ 6.71 – 6.65 (2H, m), 6.67 (1H, d, *J*=1.8 Hz), 6.55 (2H, s), 6.45 (1H, d, *J*=12.2 Hz), 6.37 (1H, d, *J*=12.2 Hz), 3.84 (3H, s), 3.82 (3H, s), 3.70 (6H, s). <sup>13</sup>C NMR (150 MHz, CDCl<sub>3</sub>) δ 153.09, 146.91, 137.18, 136.02, 133.30, 130.32, 130.29, 128.64, 119.82, 115.53, 110.29, 106.20, 61.23, 56.20, 55.80. HRMS (ESI) calculated for C<sub>18</sub>H<sub>21</sub>NO<sub>4</sub> 315.1471, (M+H)<sup>+</sup> 316.1549, found 316.1543.

**(*S,Z*)-2-(((9*H*-fluoren-9-yl)methoxy)carbonyl)amino)-3-((2-methoxy-5-(3,4,5-trimethoxystyryl)phenyl)amino)-3-oxopropyl acetate (**47**)**

3' CA4-amine (0.11 g, 0.35 mmol) was dissolved in CH<sub>2</sub>Cl<sub>2</sub> (10 mL), and then Fmoc-serine acetate (0.19 g, 0.52 mmol), T3P (0.62 mL, 1.0 mmol), and Et<sub>3</sub>N (0.073 mL, 0.52 mmol) were added. After stirring for 16 h at room temperature, water (10 mL) was added, and the reaction

mixture was extracted with CH<sub>2</sub>Cl<sub>2</sub> (3 × 10 mL). The combined organic phase was rinsed with brine, dried with Na<sub>2</sub>SO<sub>4</sub>, and concentrated under reduced pressure, and the residue was purified by flash column chromatography using a pre-packed 10 g silica column [solvent A: EtOAc; solvent B: hexanes; gradient: 12%A / 88%B (1 CV), 12%A / 88%B → 100%A / 0%B (10 CV), 100%A / 0%B (2 CV); flow rate: 36 mL/min; monitored at 254 and 280 nm] affording the desired Fmoc-*L*-serinamide acetate **47** (0.22 g, 0.32 mmol, 93%) as a white solid. <sup>1</sup>H NMR (600 MHz, CDCl<sub>3</sub>) δ 8.42 (1H, s), 8.31 (1H, d, *J*=1.8 Hz), 7.77 (2H, d, *J*=7.0 Hz), 7.60 (2H, d, *J*=6.7 Hz), 7.40 (2H, t, *J*=7.0 Hz), 7.31 (2H, d, *J*=5.6 Hz), 7.03 (1H, d, *J*=8.2 Hz), 6.70 (1H, d, *J*=8.5 Hz), 6.51 (2H, s), 6.50 (2H, d, *J*=12.9 Hz), 6.45 (1H, d, *J*=12.1 Hz), 5.79 (1H, d, *J*=7.0 Hz), 4.65 (1H, d, *J*=4.8 Hz), 4.53 – 4.48 (2H, m), 4.35 – 4.30 (1H, m), 4.24 (1H, t, *J*=7.0 Hz), 4.02 (1H, dd, *J*=9.4, 2.7 Hz), 3.84 (3H, s), 3.79 (3H, s), 3.68 (6H, s), 2.09 (3H, s). <sup>13</sup>C NMR (150 MHz, CDCl<sub>3</sub>) δ 170.99, 166.74, 153.17, 147.41, 143.93, 143.84, 141.59, 137.32, 133.05, 130.45, 129.75, 129.61, 128.13, 127.42, 125.35, 125.28, 121.14, 120.37, 120.35, 109.87, 106.19, 67.78, 64.23, 61.21, 56.19, 56.16, 55.01, 47.34, 21.05.

**(*S,Z*)-2-amino-3-hydroxy-*N*-(2-methoxy-5-(3,4,5-trimethoxystyryl)phenyl)propanamide (3' CA4-*L*-serinamide)**

To a well-stirred solution of Fmoc-*L*-serinamide acetate **47** (0.22 g, 0.32 mmol) in CH<sub>2</sub>Cl<sub>2</sub>/MeOH mixture (4 mL, 1:1 ratio), 2 N NaOH (2.00 eq.) was added. The reaction mixture was stirred for 2 h at room temperature under N<sub>2</sub>. The solvent was evaporated under reduced pressure, and sat. NaHCO<sub>3</sub> (10 mL) was added. The solution was extracted with CH<sub>2</sub>Cl<sub>2</sub> (3 × 10 mL), and then the combined organic phase was rinsed with brine, dried with Na<sub>2</sub>SO<sub>4</sub>, and concentrated under reduced pressure. The residue was purified by preparative TLC [CH<sub>2</sub>Cl<sub>2</sub>/MeOH mixture (9:1 ratio)] to give the desired 3' CA4-*L*-serinamide prodrug (0.077 g,

0.19 mmol, 60%) as a yellow oil.  $^1\text{H}$  NMR (600 MHz,  $\text{CD}_3\text{OD}$ )  $\delta$  8.21 (1H, d,  $J=1.9$  Hz), 6.97 (1H, d,  $J=8.4$  Hz), 6.88 (1H, d,  $J=8.3$  Hz), 6.53 (2H, s), 6.49 (1H, d,  $J=12.1$  Hz), 6.43 (1H, d,  $J=12.1$  Hz), 3.84 (3H, s), 3.72 (2H, d,  $J=6$  Hz), 3.71 (3H, s), 3.61 (6H, s), 3.49 (1H, t,  $J=5.3$  Hz).  $^{13}\text{C}$  NMR ( $\text{CD}_3\text{OD}$ , 150 MHz)  $\delta$  172.37, 152.72, 148.32, 136.81, 132.96, 129.88, 129.24, 128.95, 126.76, 124.82, 120.56, 109.89, 106.02, 63.84, 59.74, 57.03, 55.04, 54.93. HRMS (ESI) calculated for  $\text{C}_{21}\text{H}_{26}\text{N}_2\text{O}_6$  402.1791,  $(\text{M}+\text{H})^+$  403.1864, found 403.1869.

**(*S,Z*)-2-amino-3-hydroxy-*N*-(2-methoxy-5-(3,4,5-trimethoxystyryl)phenyl)propanamide hydrochloride (AVE8062)**

3' CA4-*L*-serinamide prodrug (0.027 g, 0.067 mmol) was dissolved in MeOH (0.50 mL), and 4 N HCl in dioxane (0.08 mL, 0.32 mmol) was added to the solution. After stirring for 5 min, the solvent was evaporated to dryness, and the residue was washed with diethyl ether ( $3 \times 2$  mL) to give the desired 3' CA4-*L*-serinamide prodrug salt **AVE8062** (0.020 g, 0.046 mmol, 69%) as a colorless solid.  $^1\text{H}$  NMR (600 MHz,  $\text{CD}_3\text{OD}$ )  $\delta$  7.97 (1H, d,  $J=2.0$  Hz), 7.04 (1H, dd,  $J=8.5, 2.0$  Hz), 6.93 (1H, d,  $J=8.5$  Hz), 6.52 (2H, s), 6.49 (1H, d,  $J=12.2$  Hz), 6.45 (1H, d,  $J=12.2$  Hz), 4.14 (1H, dd,  $J=6.3, 5.0$  Hz), 3.94 (1H, dd,  $J=11.2, 4.7$  Hz), 3.87 – 3.83 (4H, m), 3.71 (3H, s), 3.62 (6H, s).  $^{13}\text{C}$  NMR (150 MHz,  $\text{CD}_3\text{OD}$ )  $\delta$  165.22, 152.77, 149.21, 136.74, 132.96, 129.80, 129.07, 128.93, 126.15, 125.87, 122.42, 110.28, 105.90, 60.38, 59.78, 55.04, 55.02, 54.93. HRMS (ESI) calculated for  $\text{C}_{21}\text{H}_{27}\text{ClN}_2\text{O}_6$  438.1558,  $(\text{M}-\text{Cl})^+$  403.1864, found 403.1865.

<sup>1</sup>H NMR (CDCl<sub>3</sub>, 500 MHz) Compound **1**

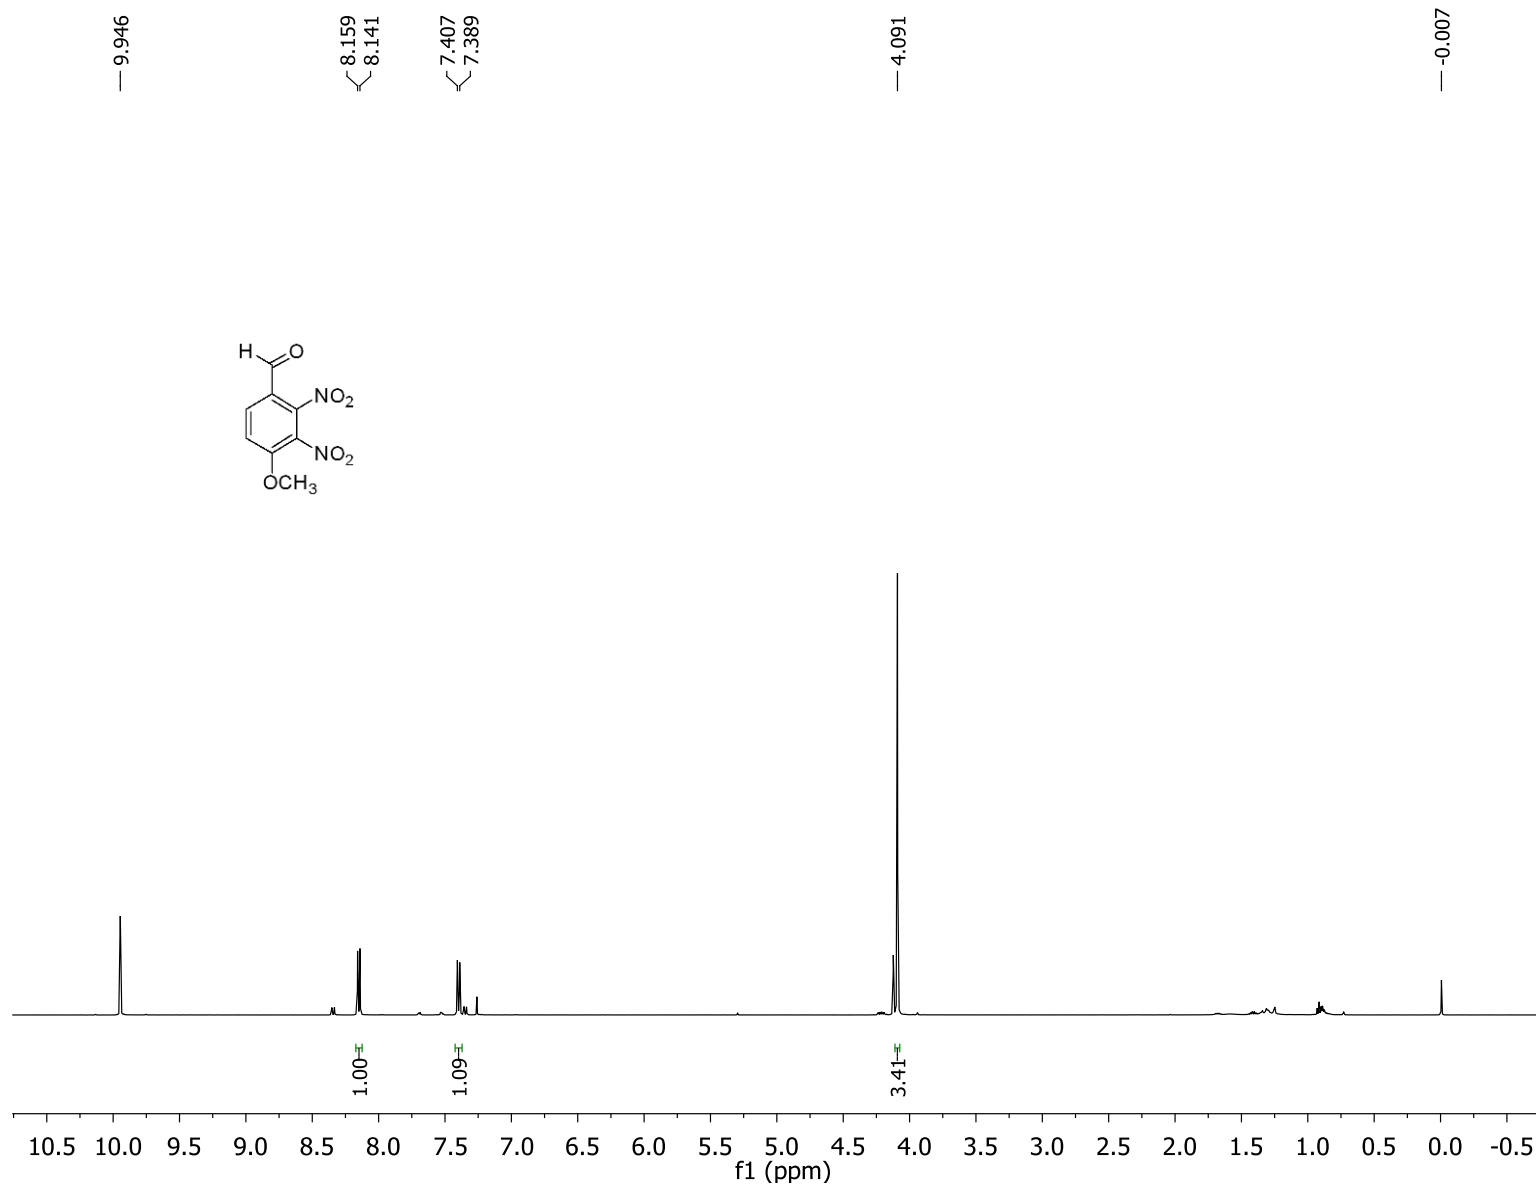

<sup>13</sup>C NMR (CDCl<sub>3</sub>, 125 MHz) Compound **1**

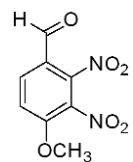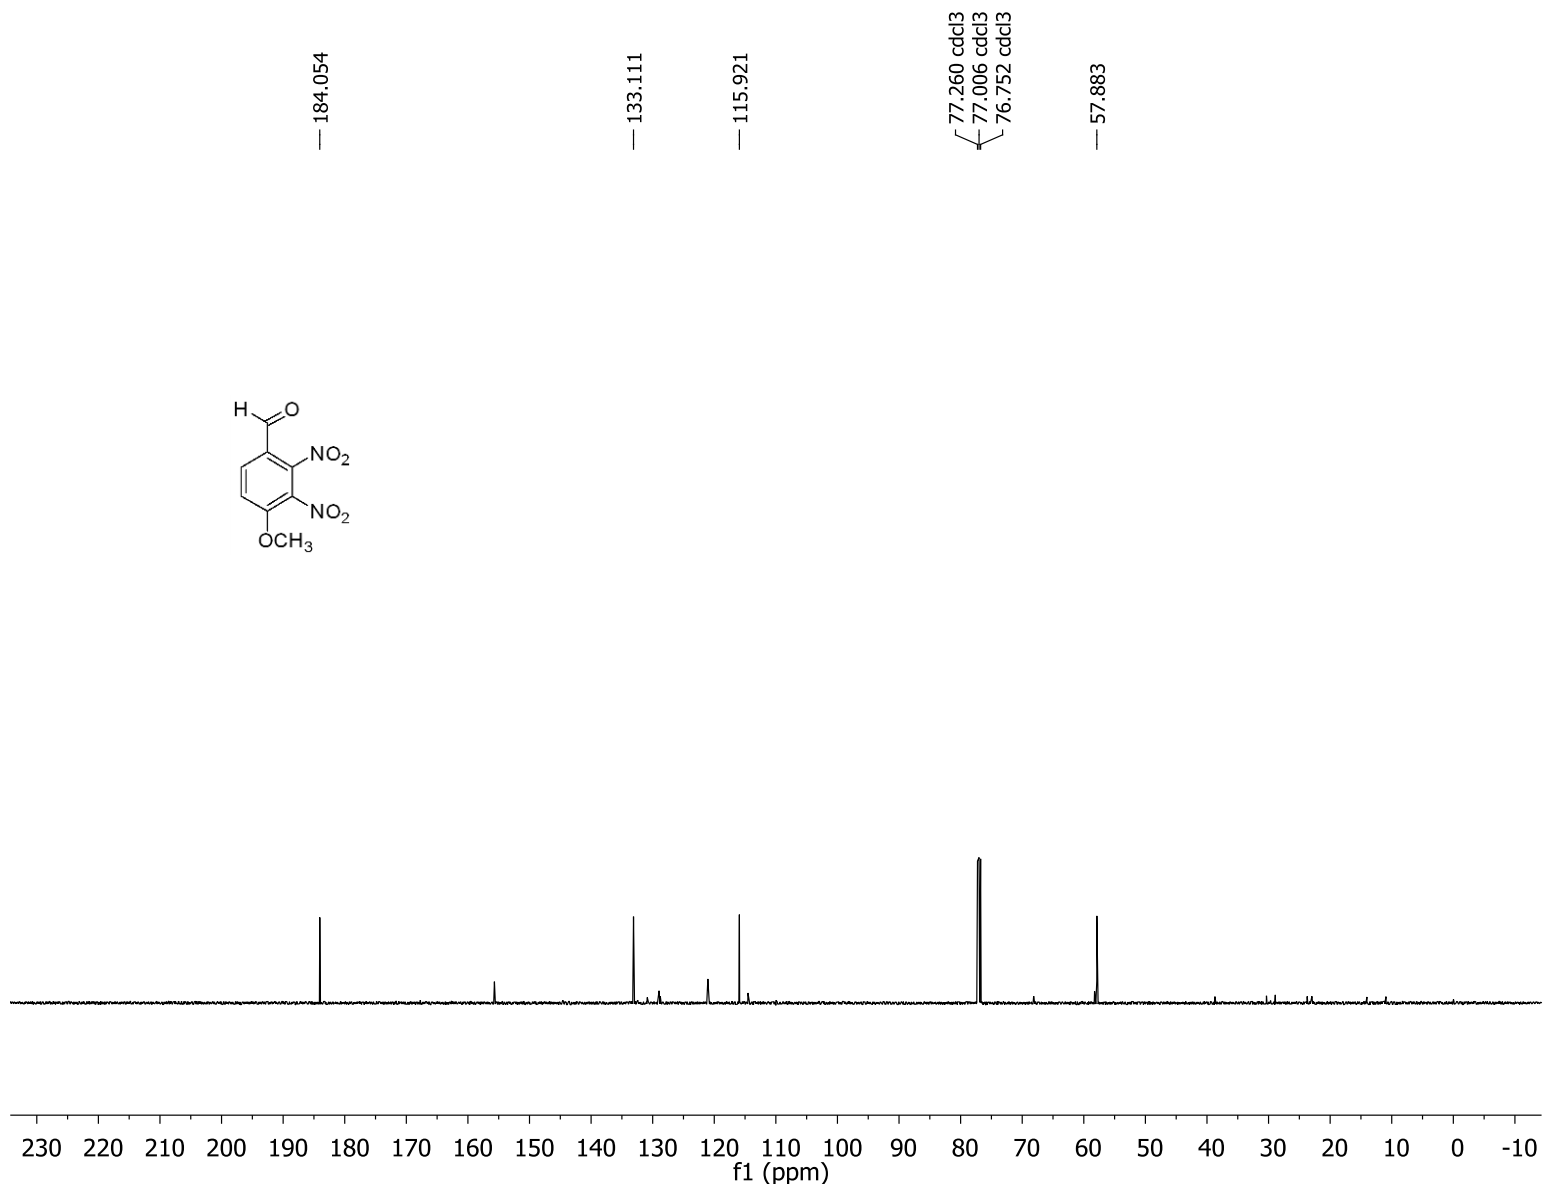

$^1\text{H}$  NMR ( $\text{CDCl}_3$ , 500 MHz) Compound **2**

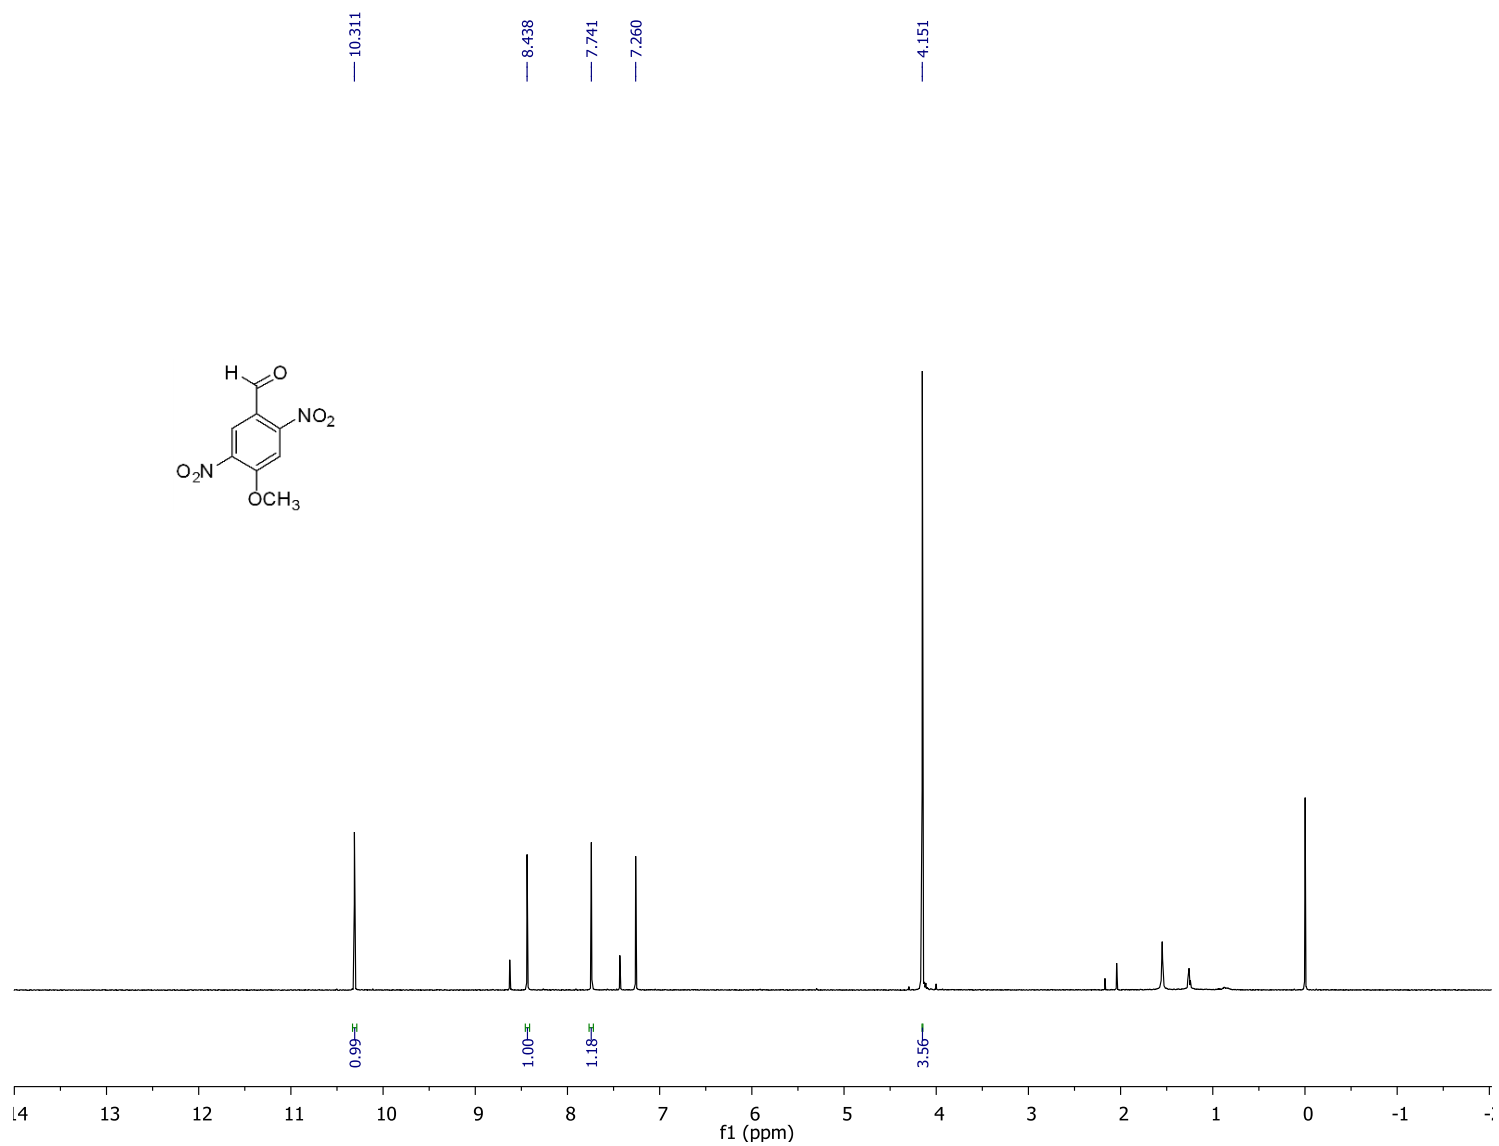

<sup>13</sup>C NMR (CDCl<sub>3</sub>, 125 MHz) Compound 2

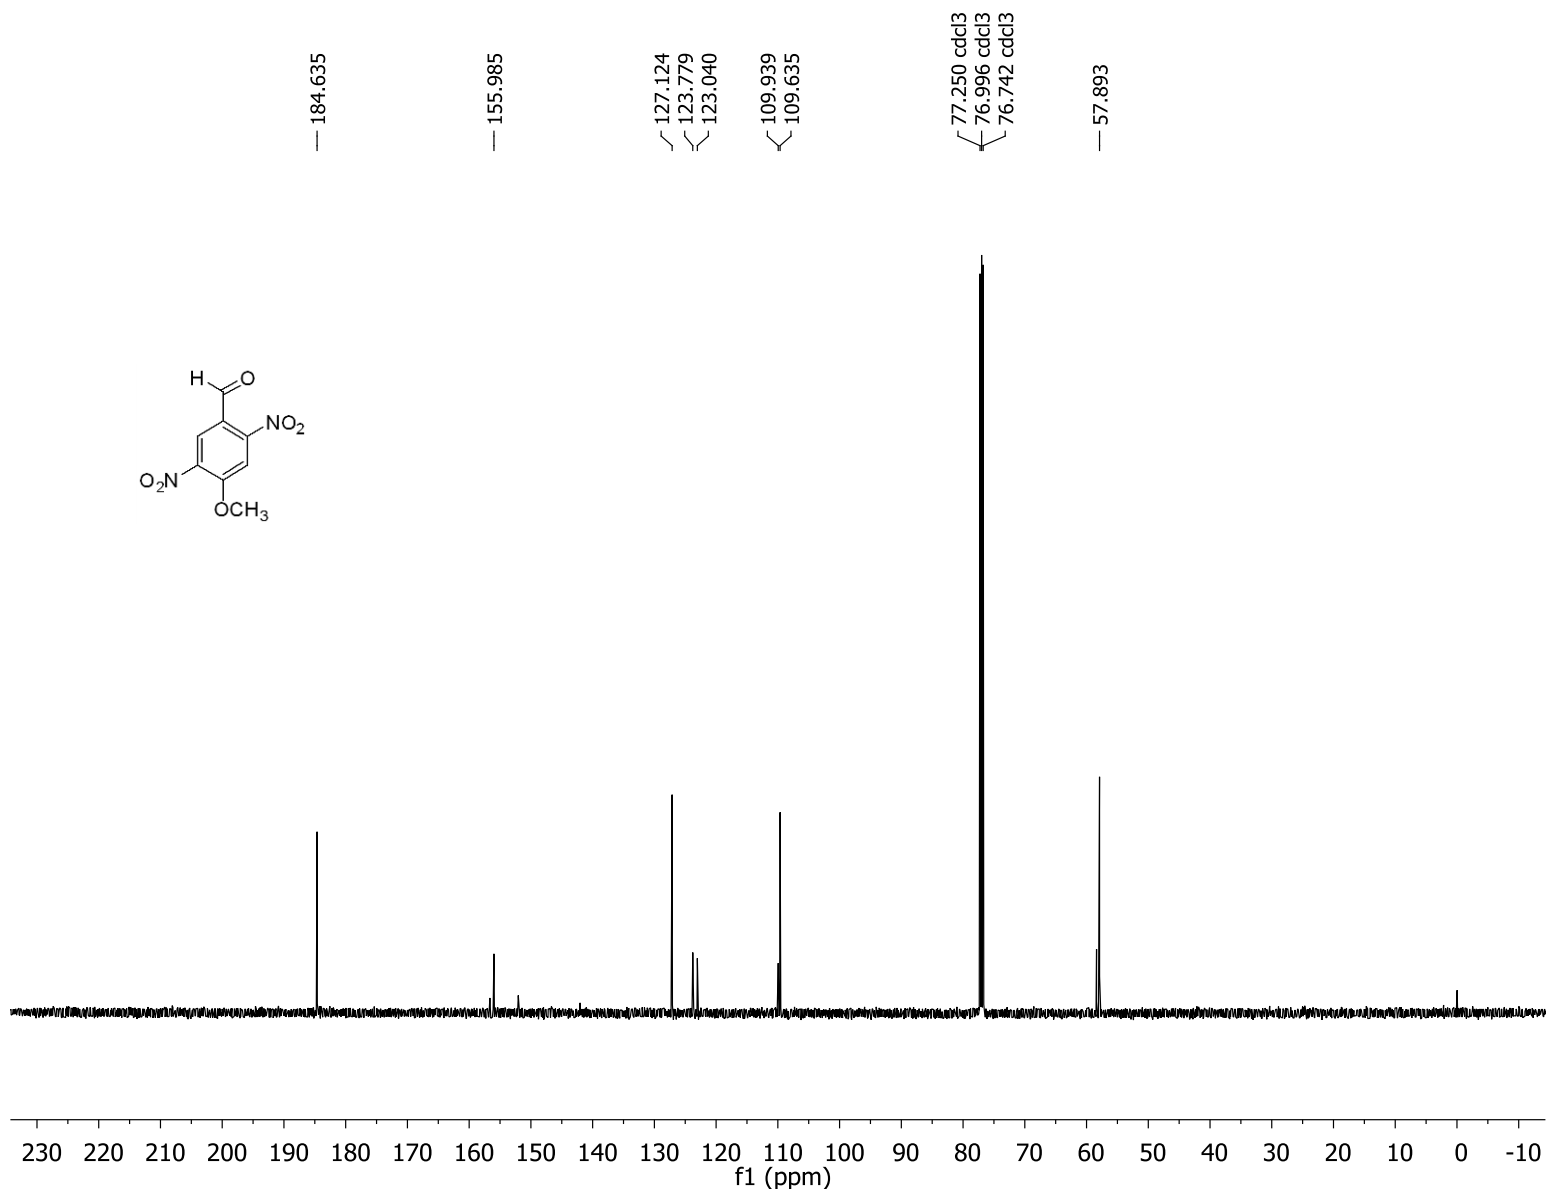



$^1\text{H}$  NMR ( $\text{CDCl}_3$ , 600 MHz) Compound **4**

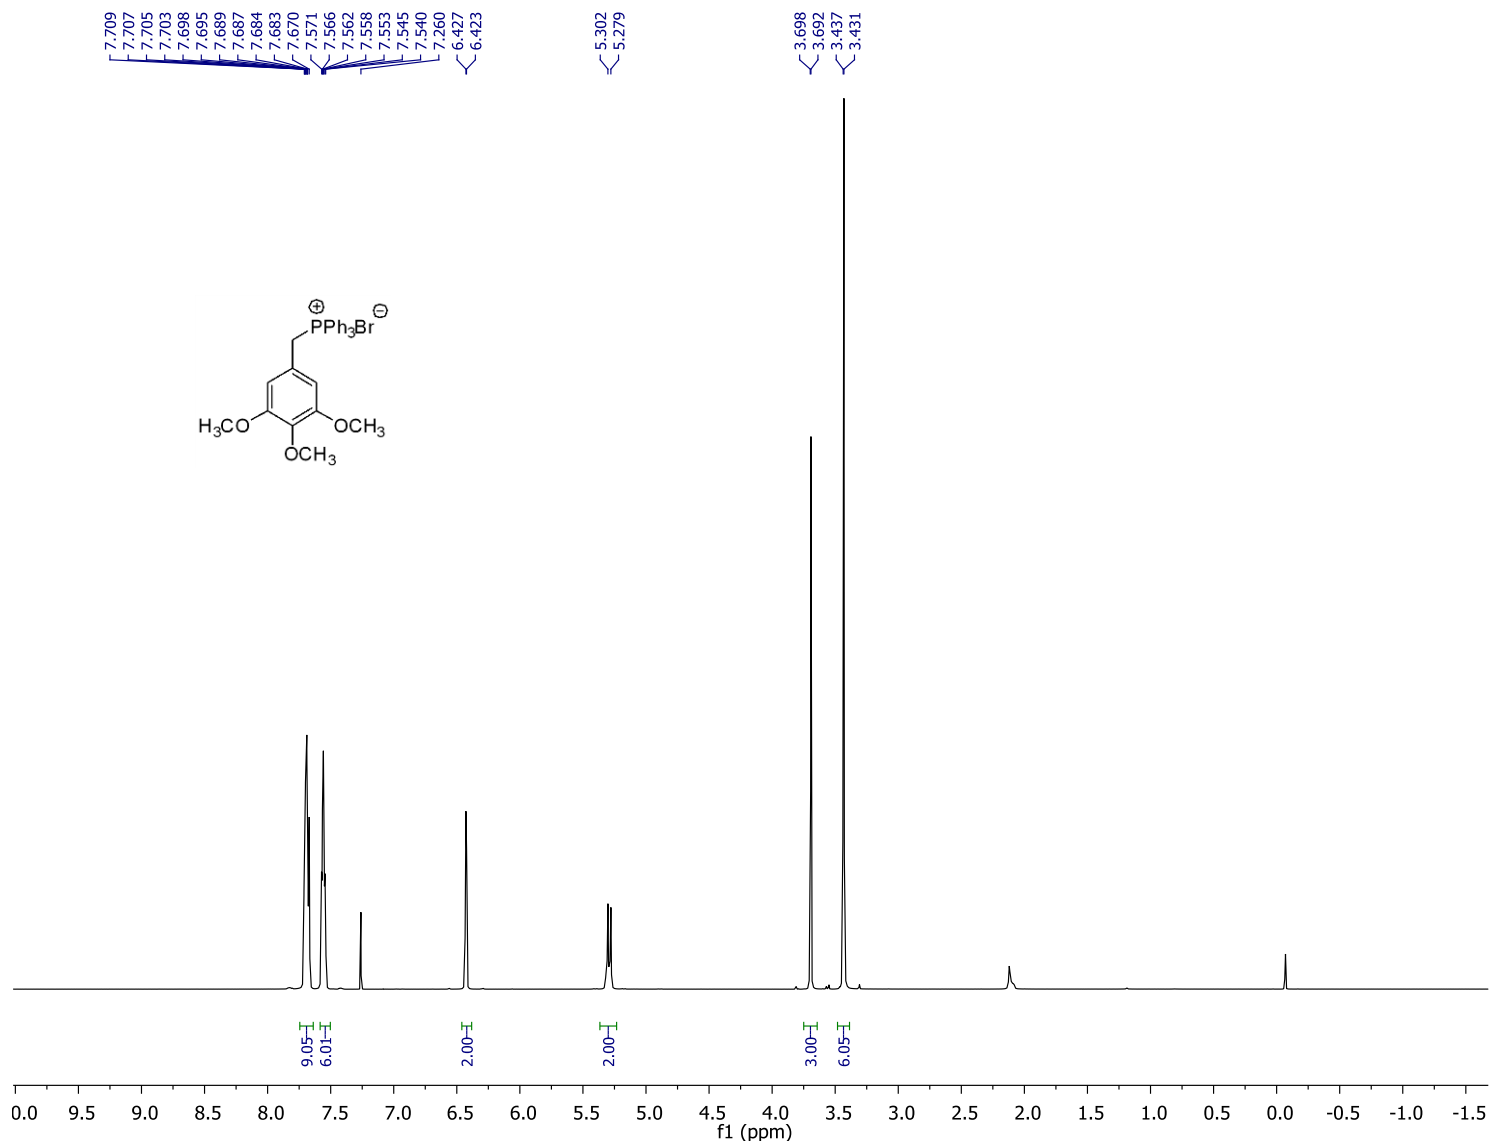

$^{31}\text{P}$  NMR ( $\text{CDCl}_3$ , 240 MHz) Compound **4**

— 23.217

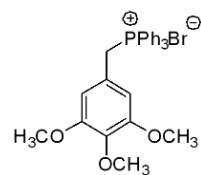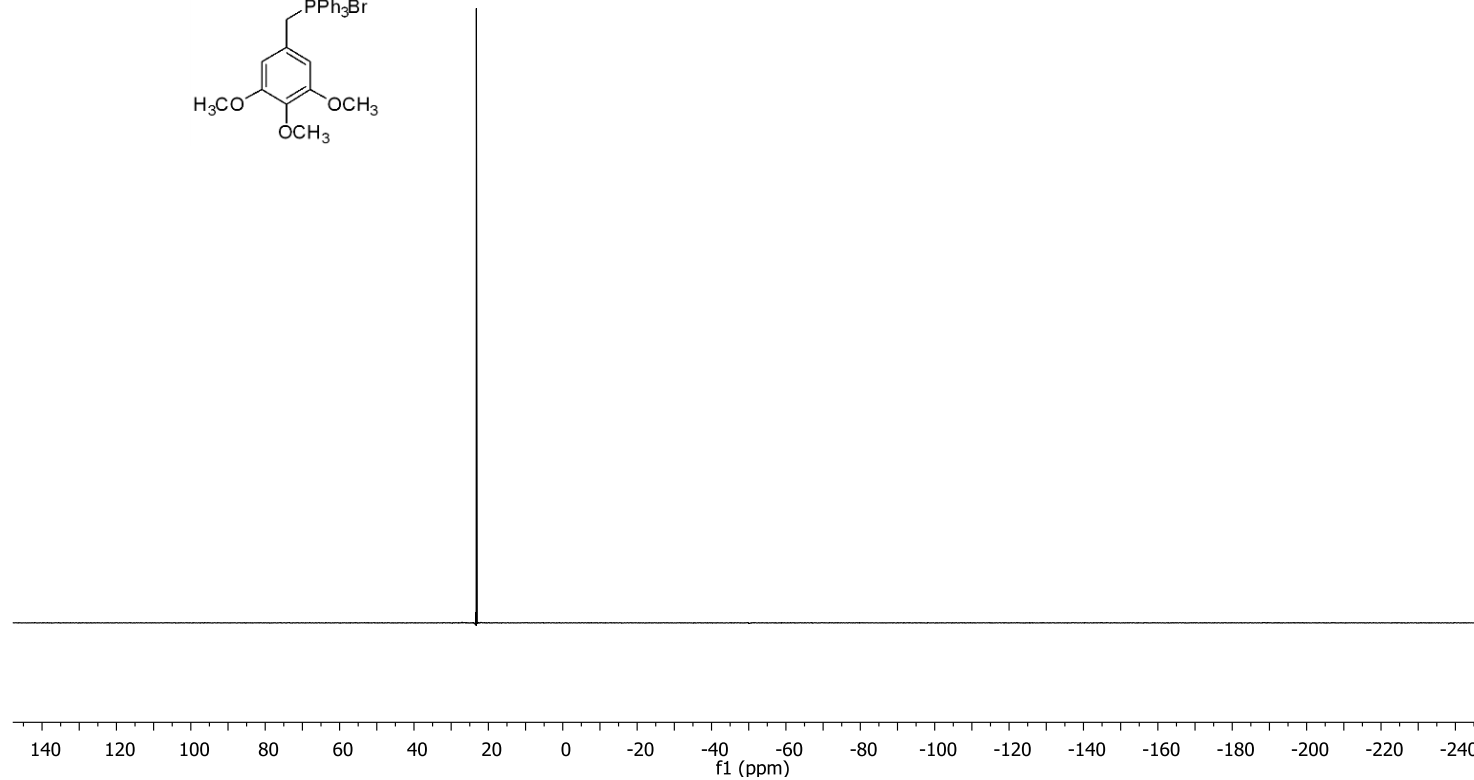

<sup>1</sup>H NMR (CDCl<sub>3</sub>, 500 MHz) Compound **5a**

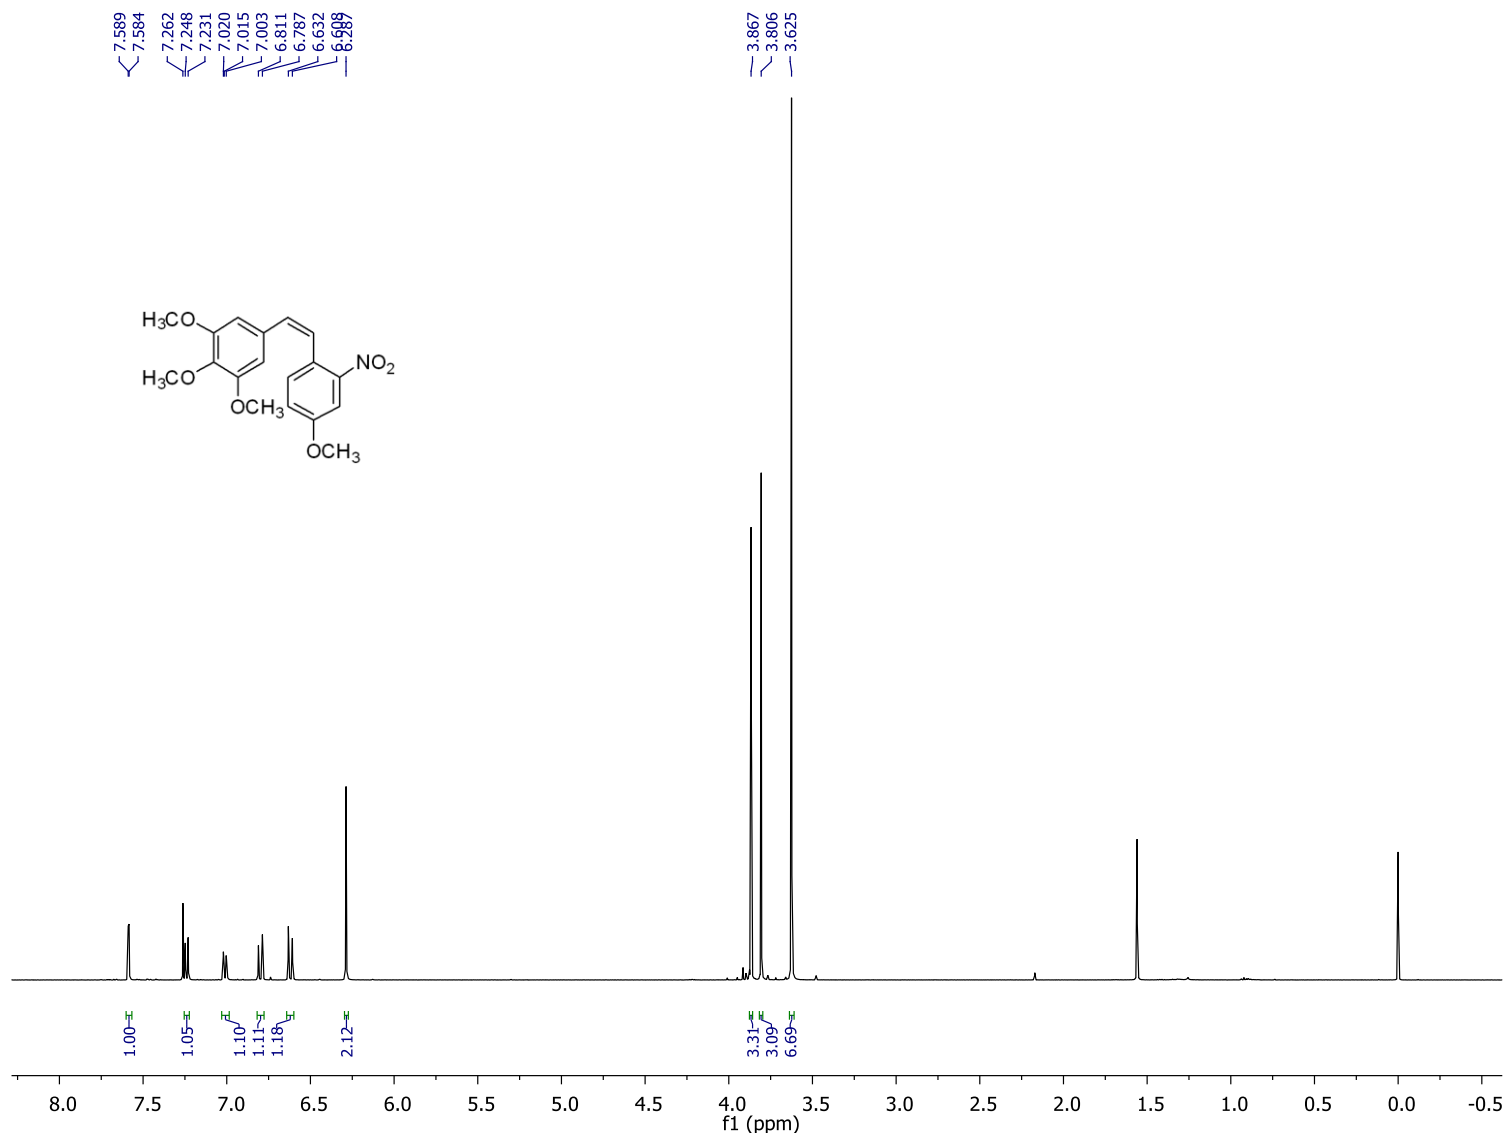

<sup>13</sup>C NMR (CDCl<sub>3</sub>, 125 MHz) Compound **5a**

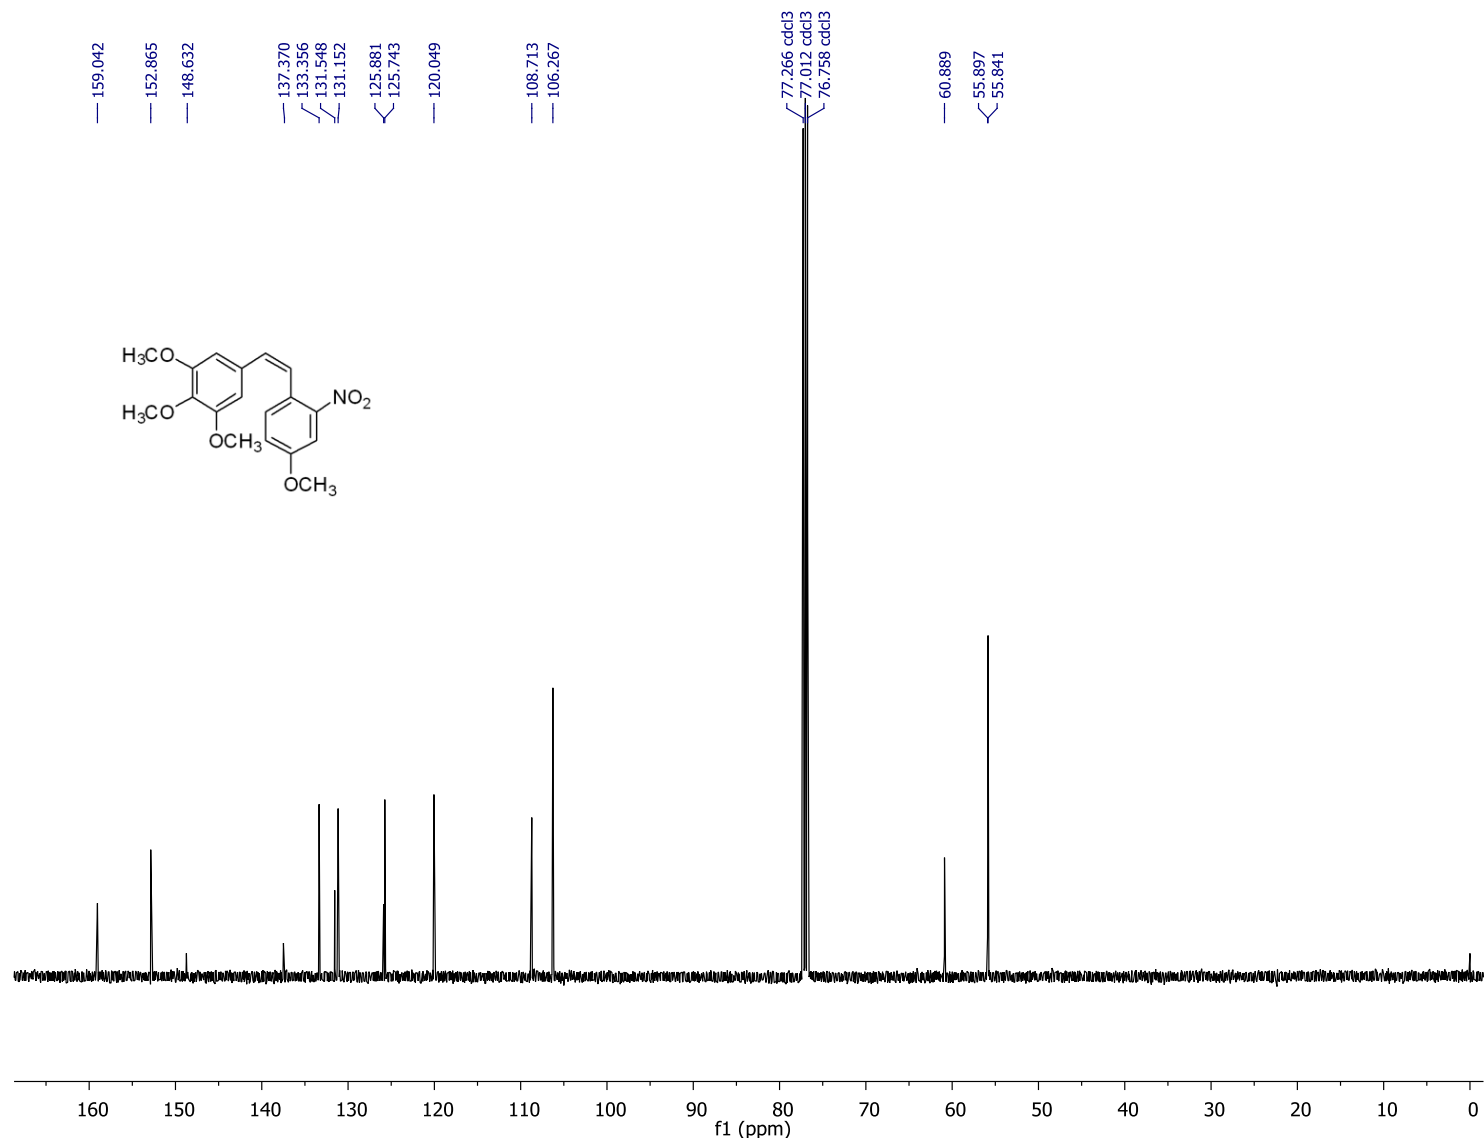

<sup>1</sup>H NMR (CDCl<sub>3</sub>, 600 MHz) Compound **5b**

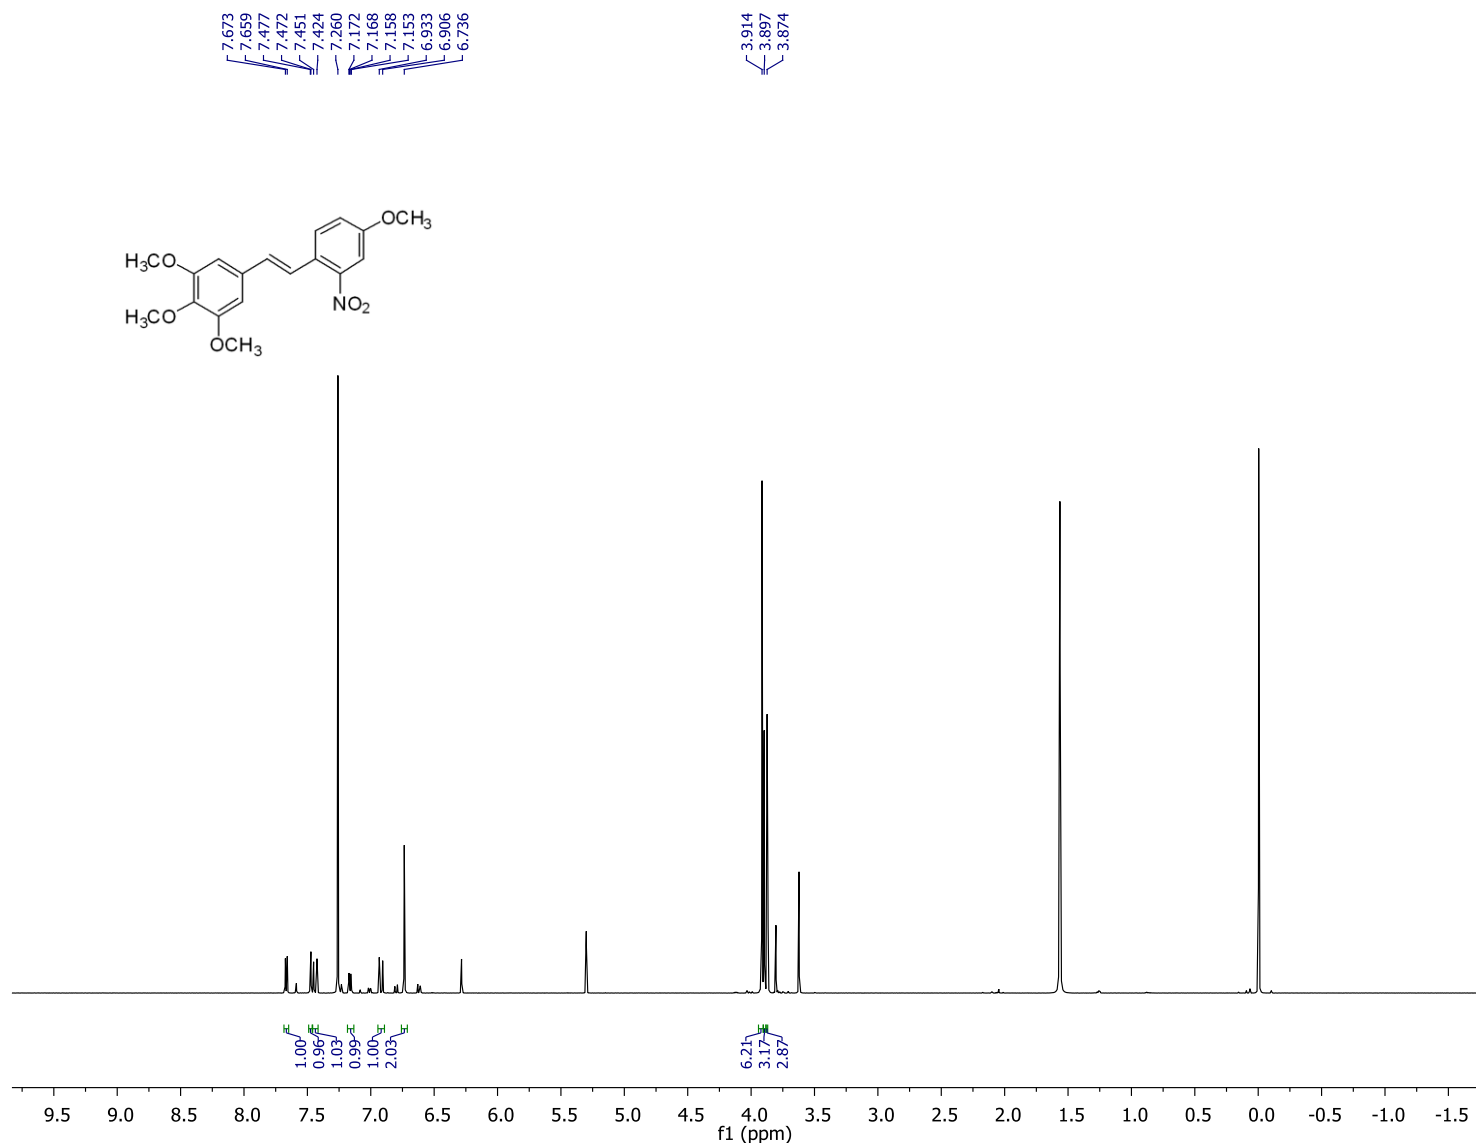

$^{13}\text{C}$  NMR ( $\text{CDCl}_3$ , 150 MHz) Compound **5b**

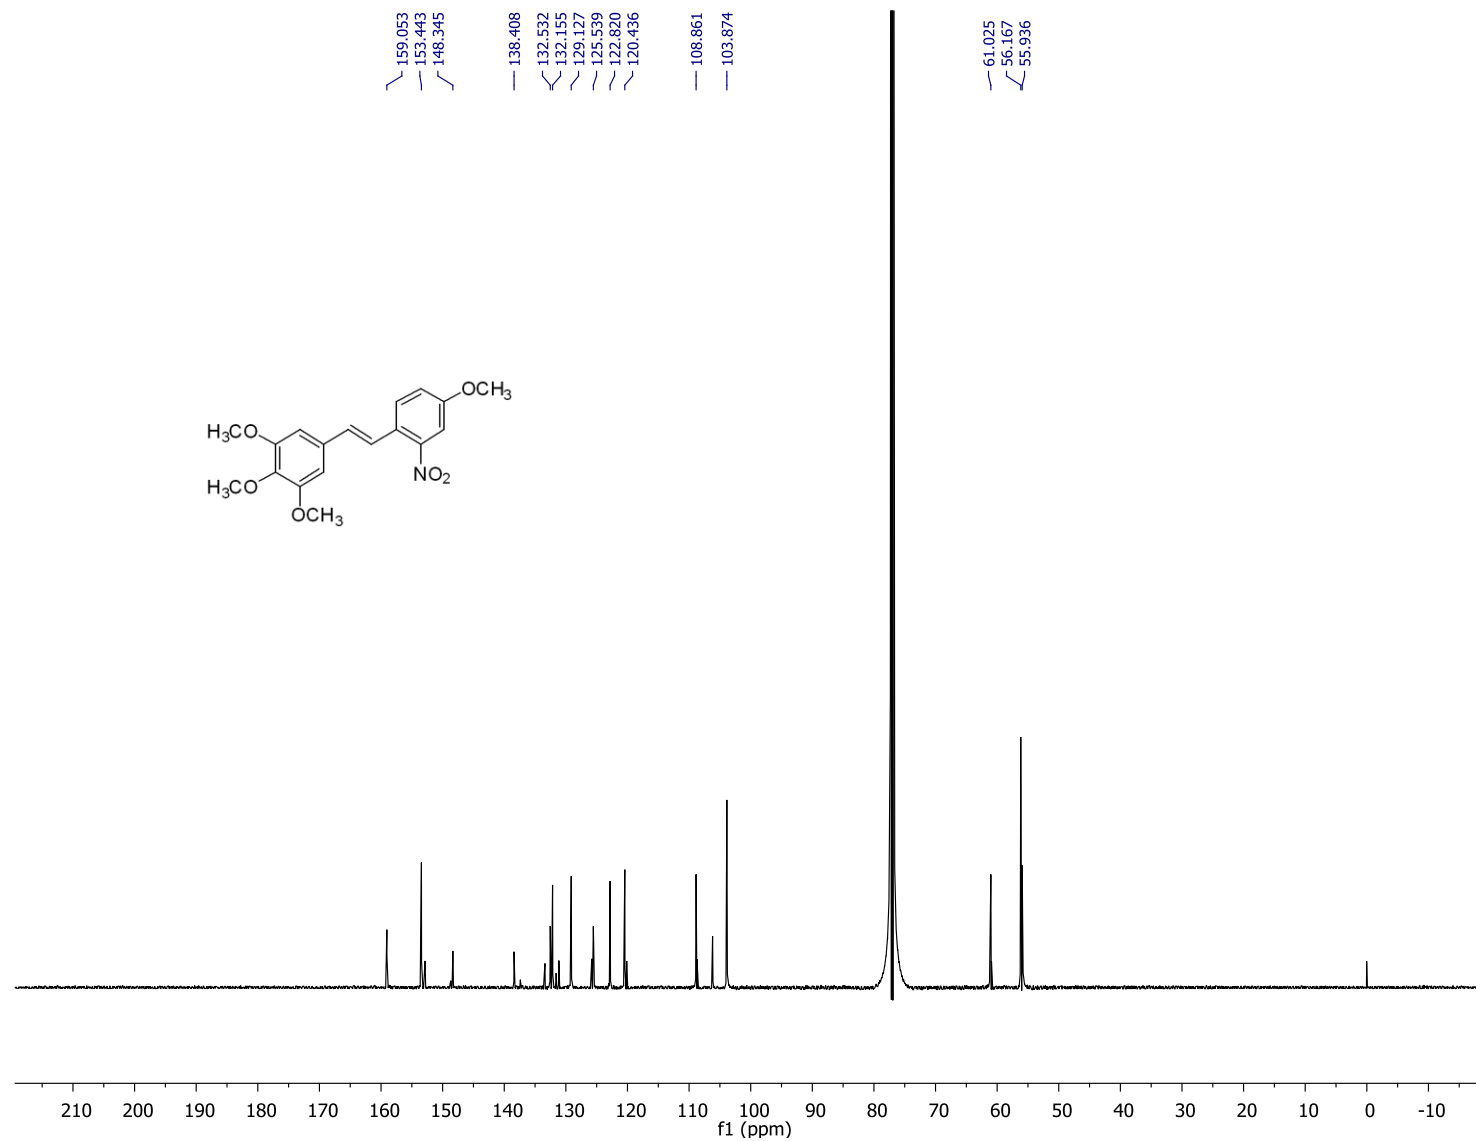

<sup>1</sup>H NMR (CDCl<sub>3</sub>, 500 MHz) Compound **6a**

7.359  
7.341  
7.263  
7.261  
7.086  
7.068  
6.786  
6.762  
6.512  
6.488  
6.303

3.951  
3.828  
3.826  
3.693  
3.692

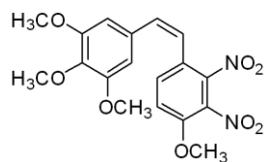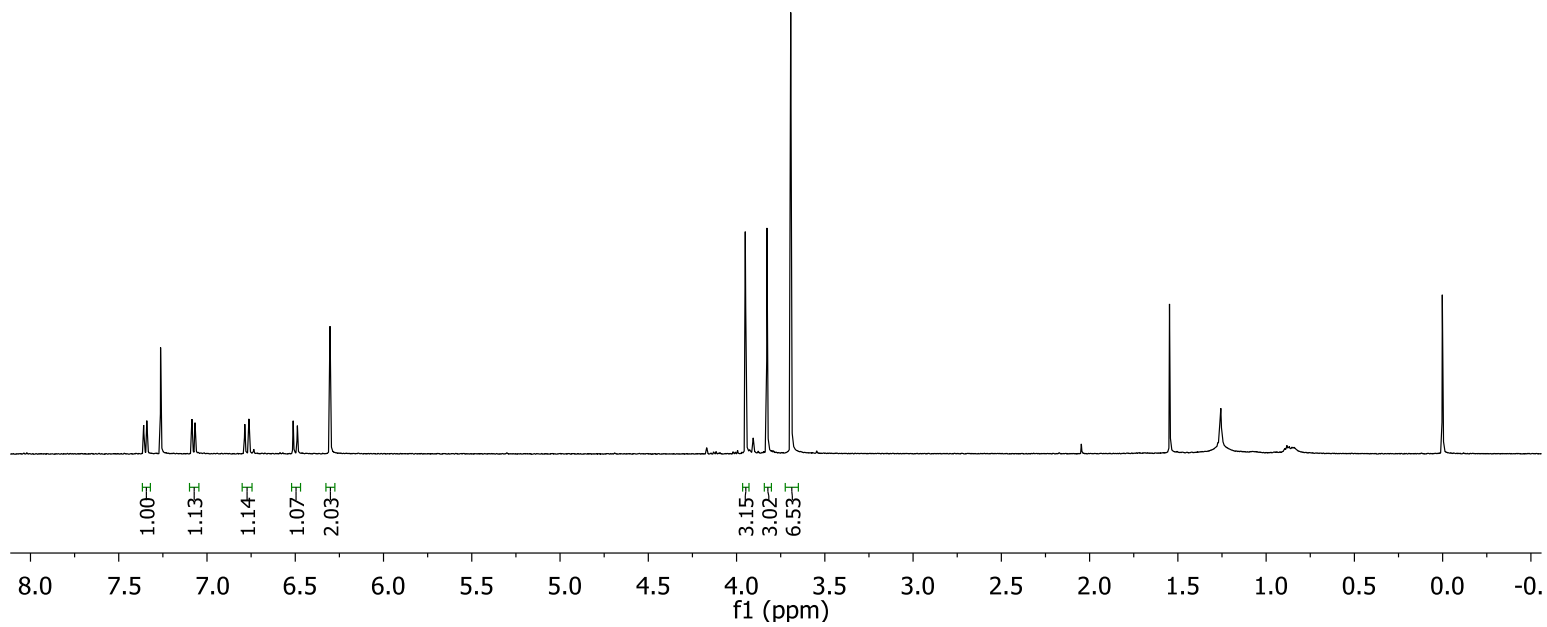

**S15**

$^{13}\text{C}$  NMR ( $\text{CDCl}_3$ , 150 MHz) Compound **6a**

153.149  
150.872  
143.023  
137.895  
135.206  
134.463  
134.277  
130.695  
124.535  
121.591  
115.875  
106.008  
60.943  
57.355  
55.988

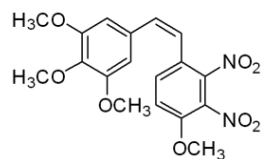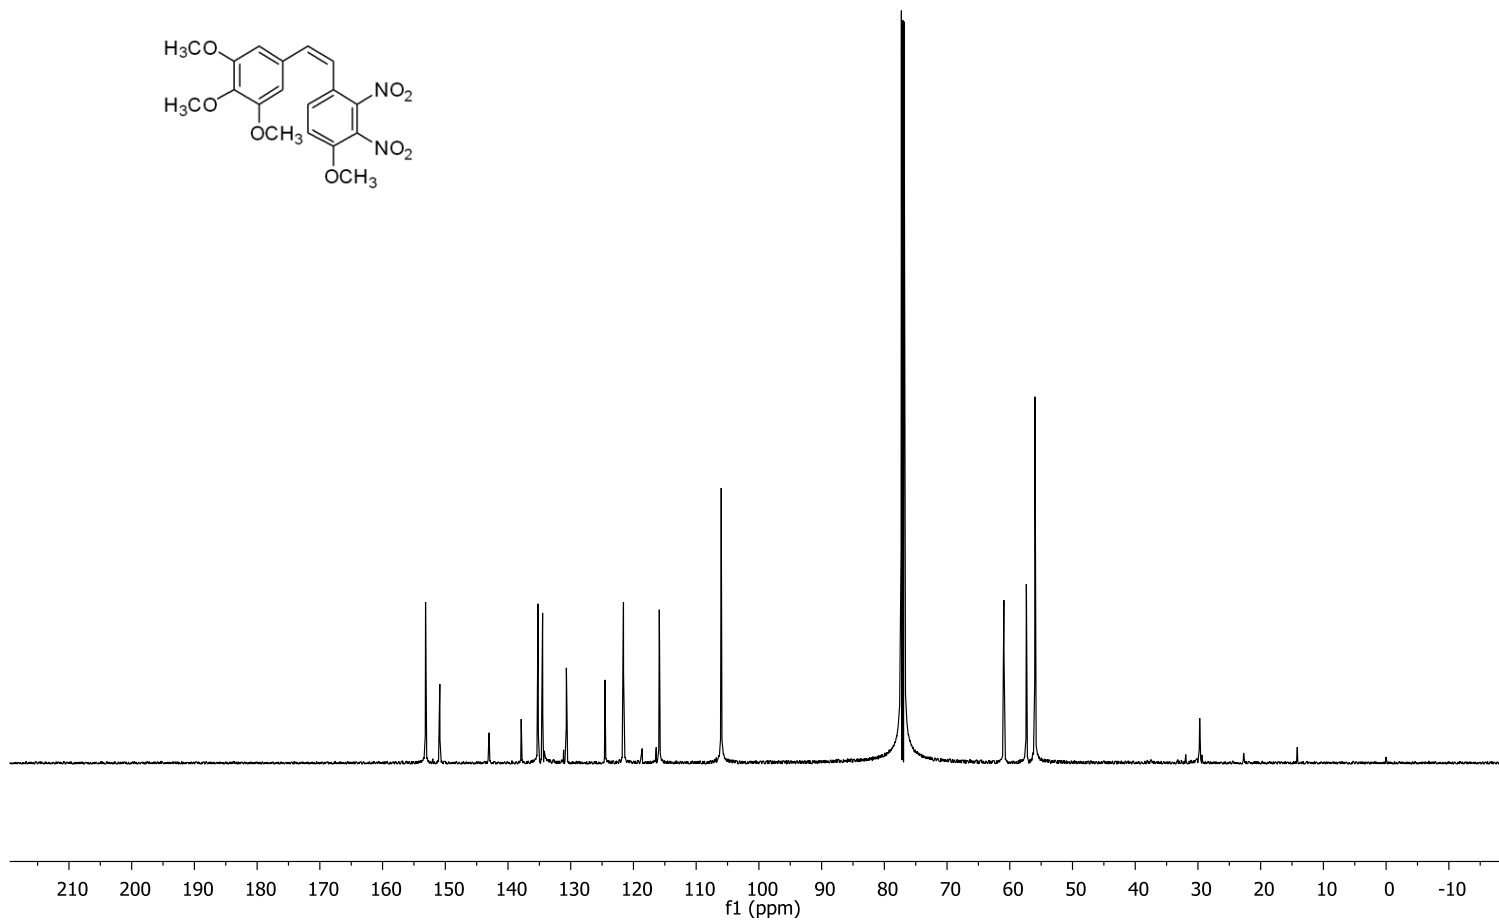



<sup>1</sup>H NMR (CDCl<sub>3</sub>, 500 MHz) Compound **6b**

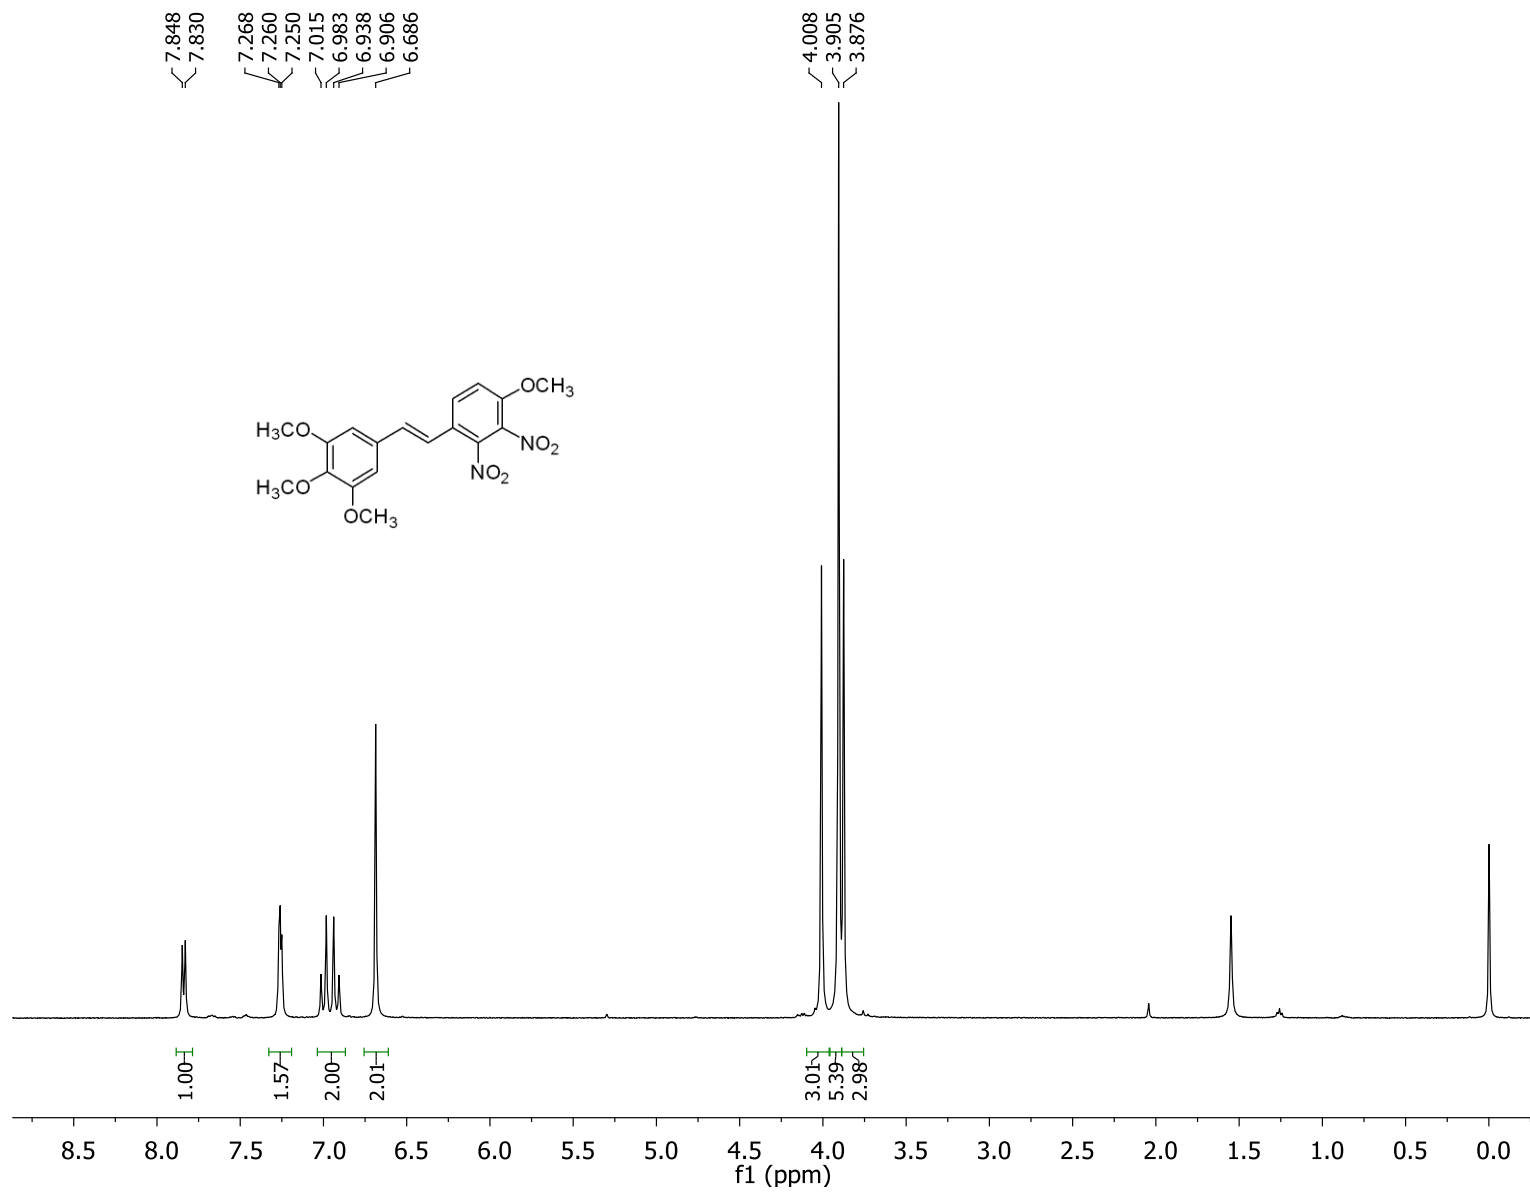

<sup>13</sup>C NMR (CDCl<sub>3</sub>, 125 MHz) Compound **6b**

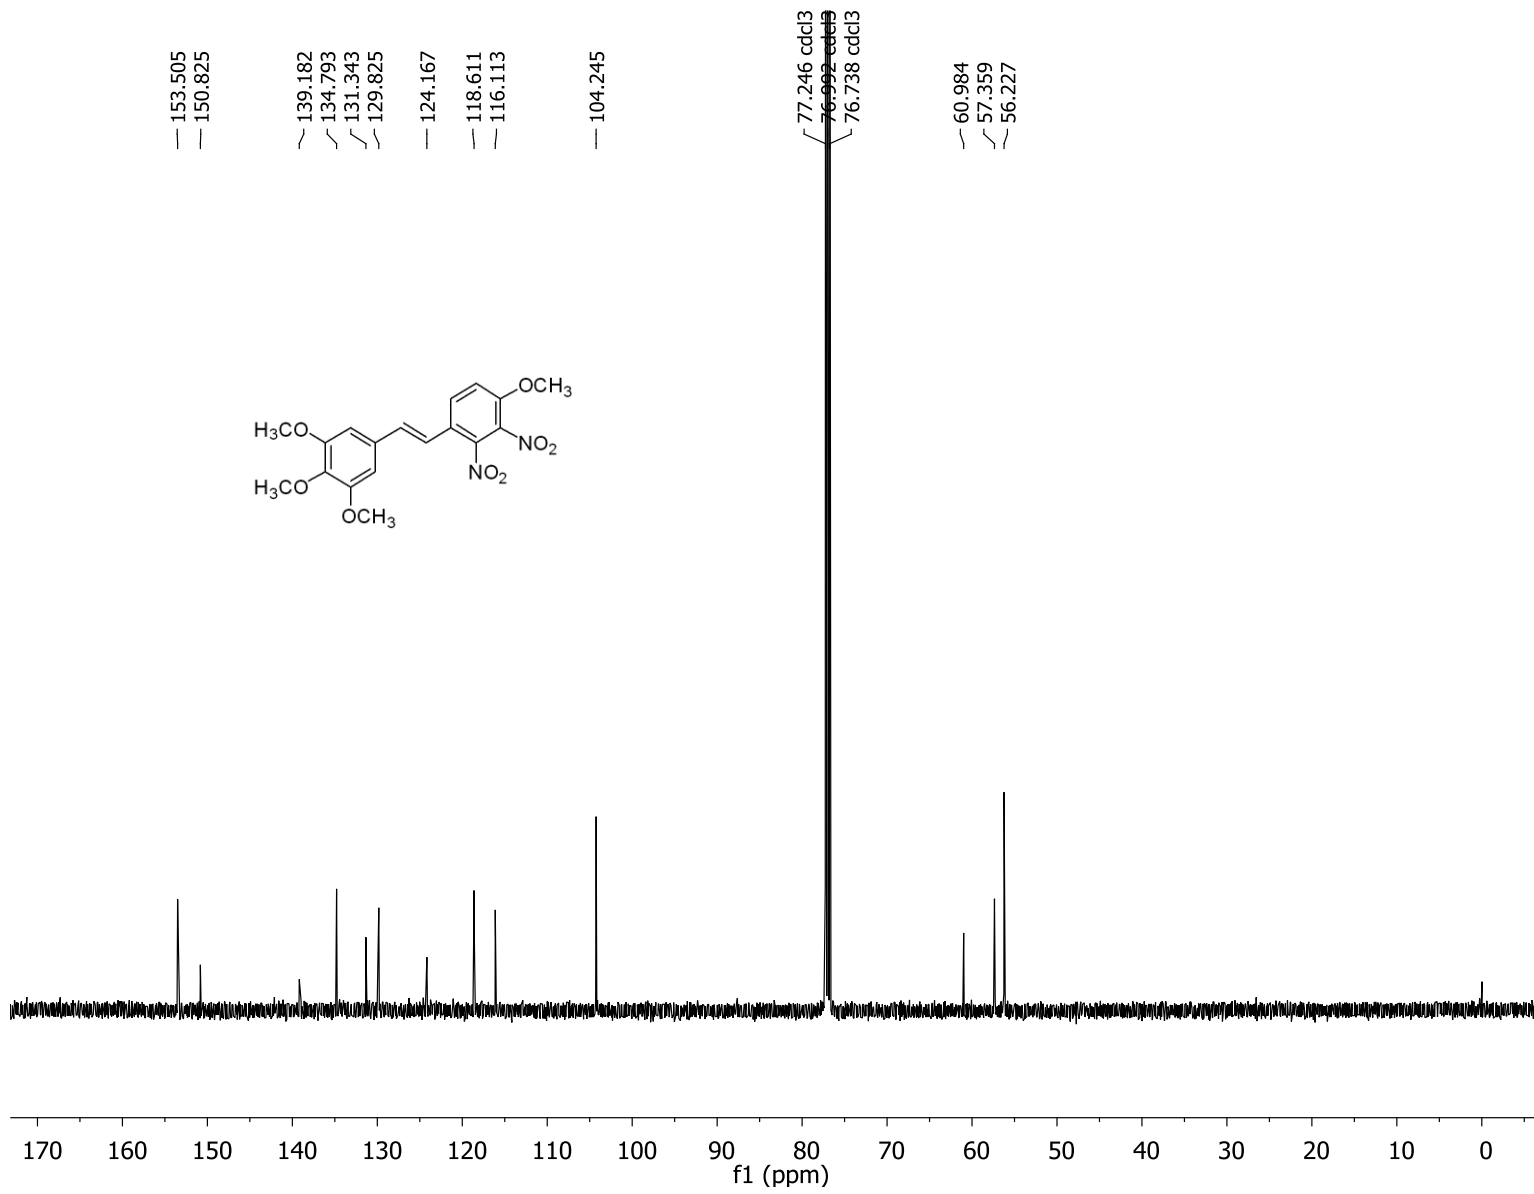

$^1\text{H}$  NMR ( $\text{CDCl}_3$ , 500 MHz) Compound 7

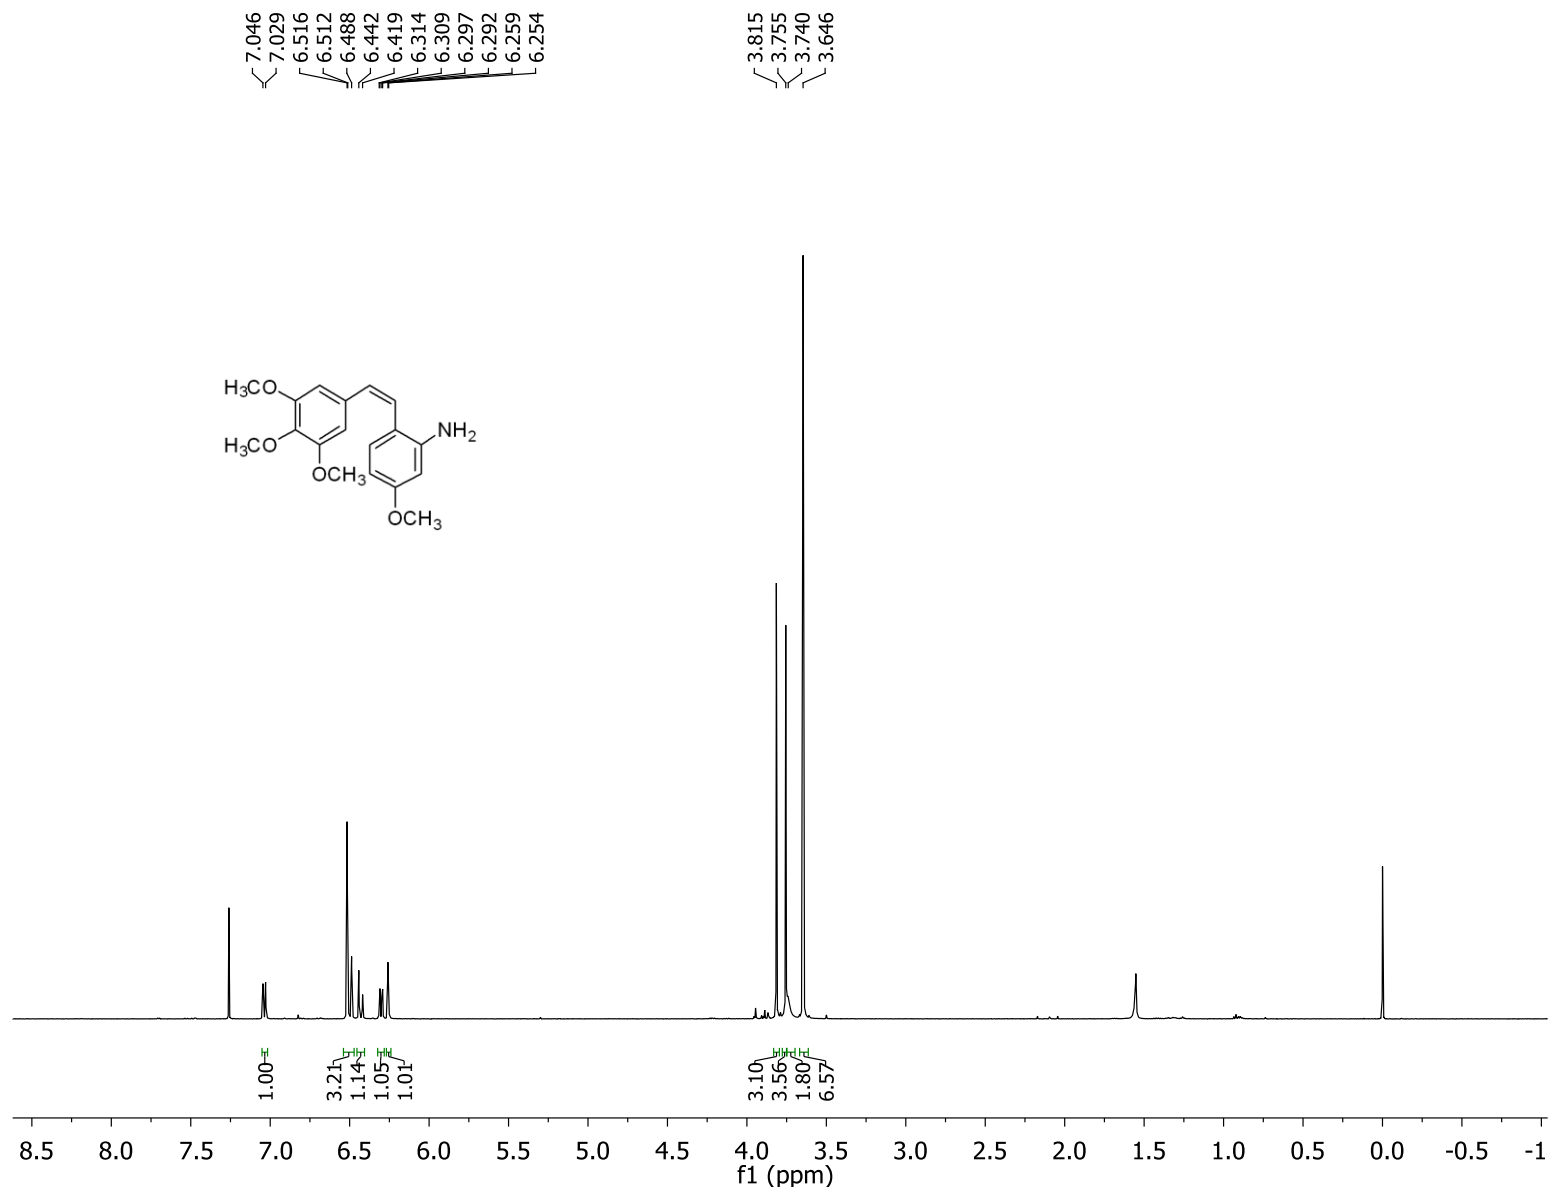

S19

<sup>13</sup>C NMR (CDCl<sub>3</sub>, 125 MHz) Compound 7

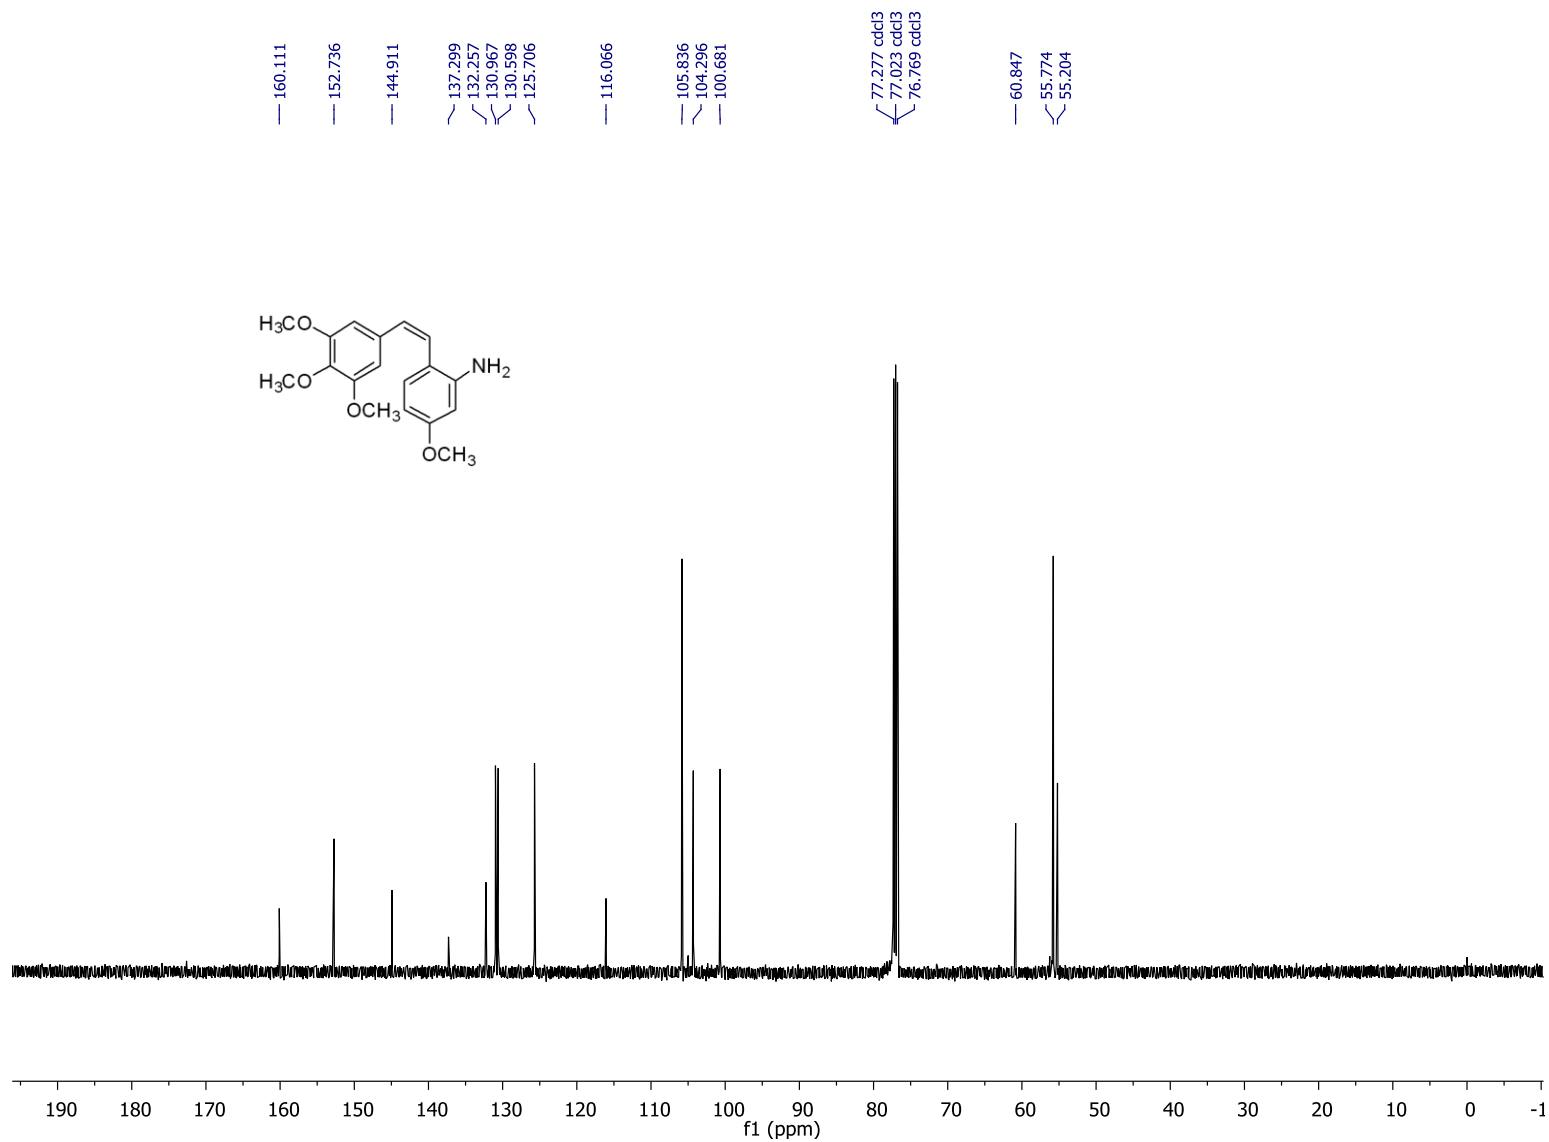

# HRMS Compound 7

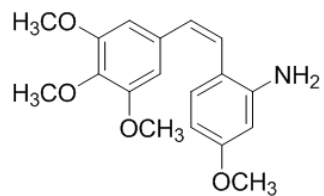

Chemical Formula:  $C_{18}H_{21}NO_4$   
Exact Mass: 315.1471

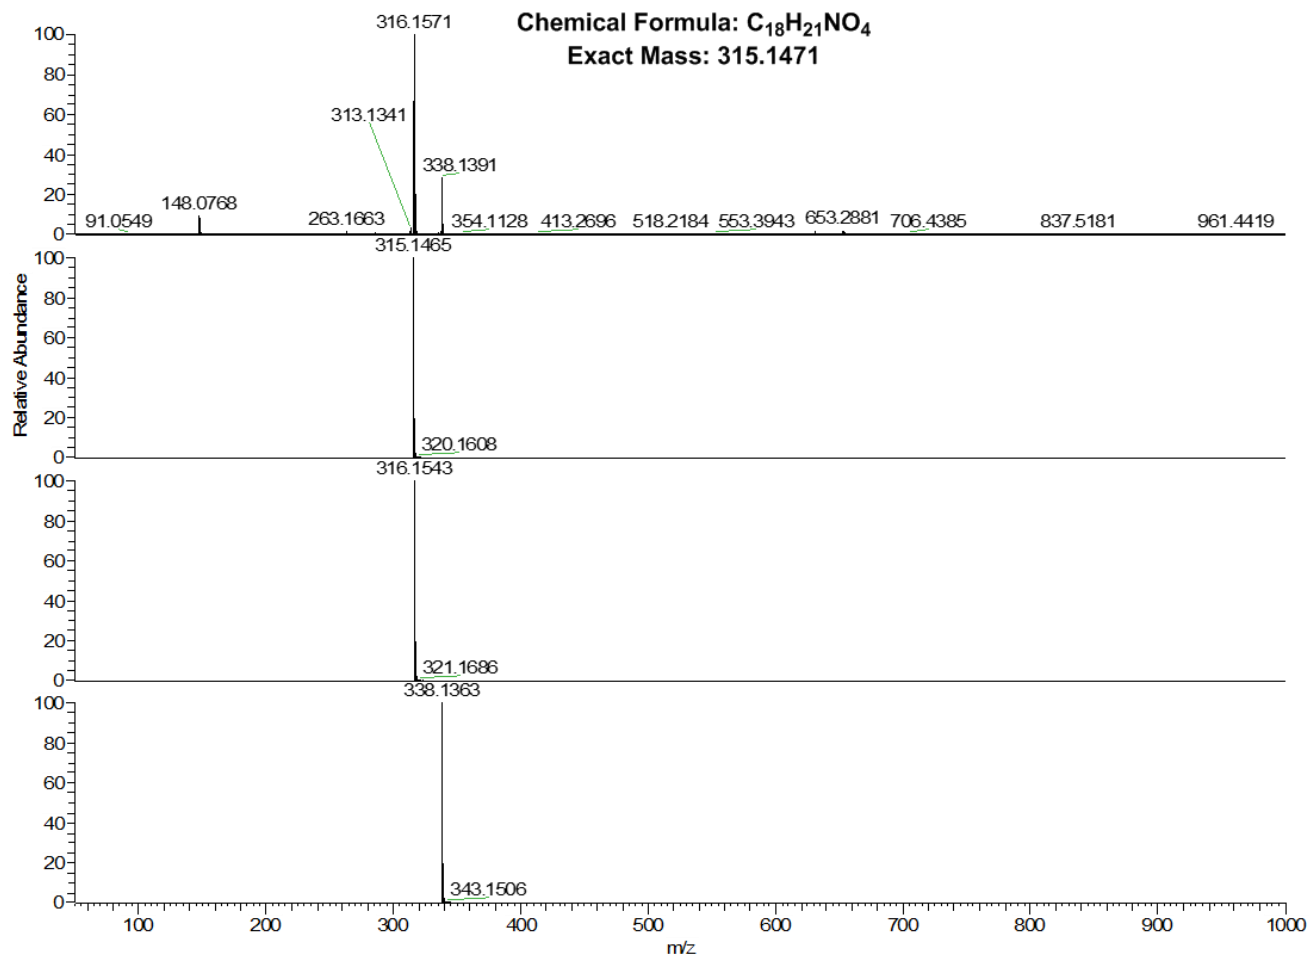

NL:  
2.41E7  
LD-II-67-2'-CA4-  
amine\_Orbi\_+ESI#1  
RT: 0.01 AV: 1 T:  
FTMS +p ESI Full ms  
[50.00-1000.00]

NL:  
8.11E5  
 $C_{18}H_{21}NO_4$   
 $C_{18}H_{21}N_1O_4$   
pa Chrg 1

NL:  
8.11E5  
 $C_{18}H_{21}NO_4 + H$   
 $C_{18}H_{22}N_1O_4$   
pa Chrg 1

NL:  
8.11E5  
 $C_{18}H_{21}NO_4 + Na$   
 $C_{18}H_{21}N_1O_4Na_1$   
pa Chrg 1

## HPLC for Compound 7

Data File C:\CHEM32\1\DATA\LAXMAN\LDII-67\RUN2\LDII67-RUN00001.D

Sample Name: LD-II-67-1-run2

```
=====
Acq. Operator   : Laxman
Acq. Instrument : Instrument 1           Location : -
Injection Date  : 7/3/2013 10:53:44 AM
Acq. Method     : C:\CHEM32\1\METHODS\MASTERMETHOD.M
Last changed    : 7/3/2013 10:38:50 AM by Laxman
Analysis Method : C:\CHEM32\1\DATA\LAXMAN\LDII-67\RUN2\LDII67-RUN00001.D\DA.M (MASTERMETHOD.M)
Last changed    : 7/3/2013 11:43:58 AM by Laxman
Sample Info     :
                  mastermethod
=====
```

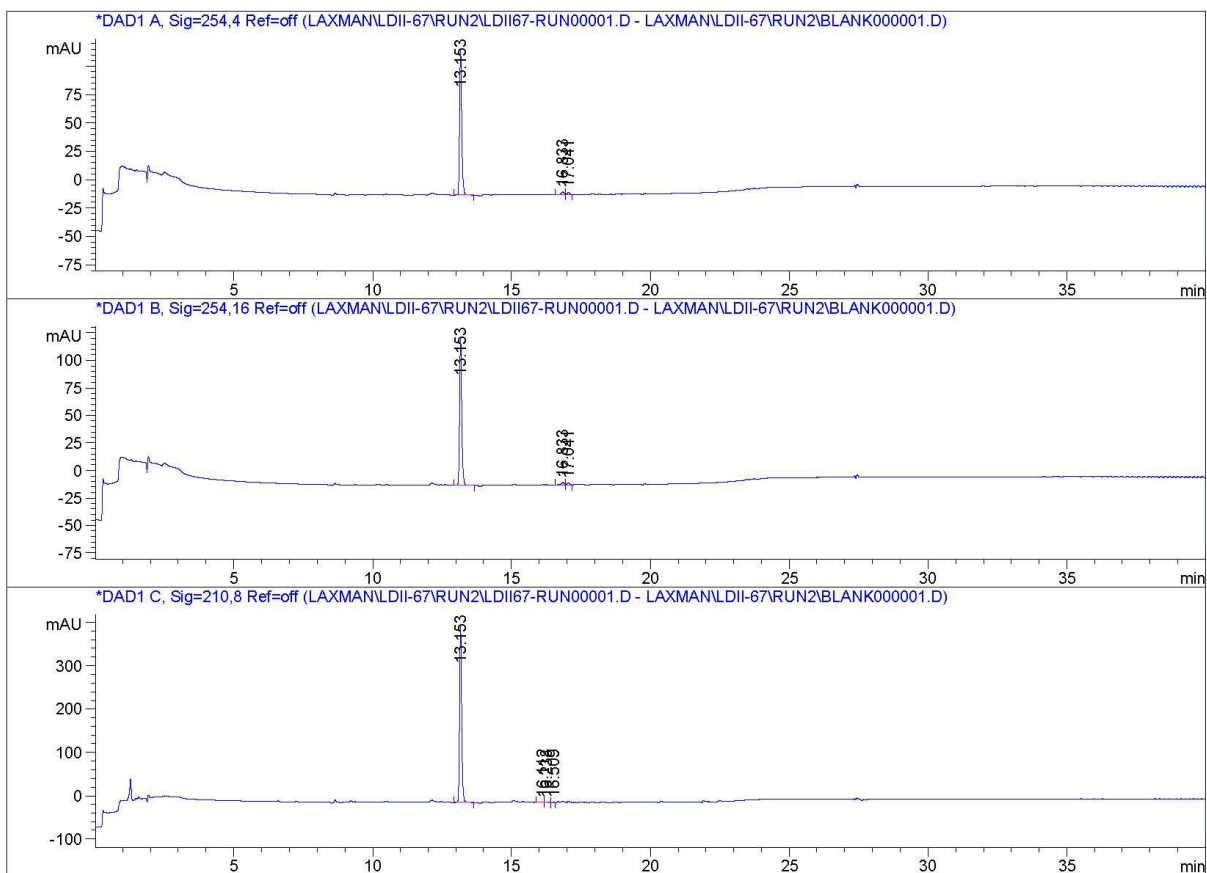

Data File C:\CHEM32\1\DATA\LAXMAN\LDII-67\RUN2\LDII67-RUN00001.D  
Sample Name: LD-II-67-1-run2

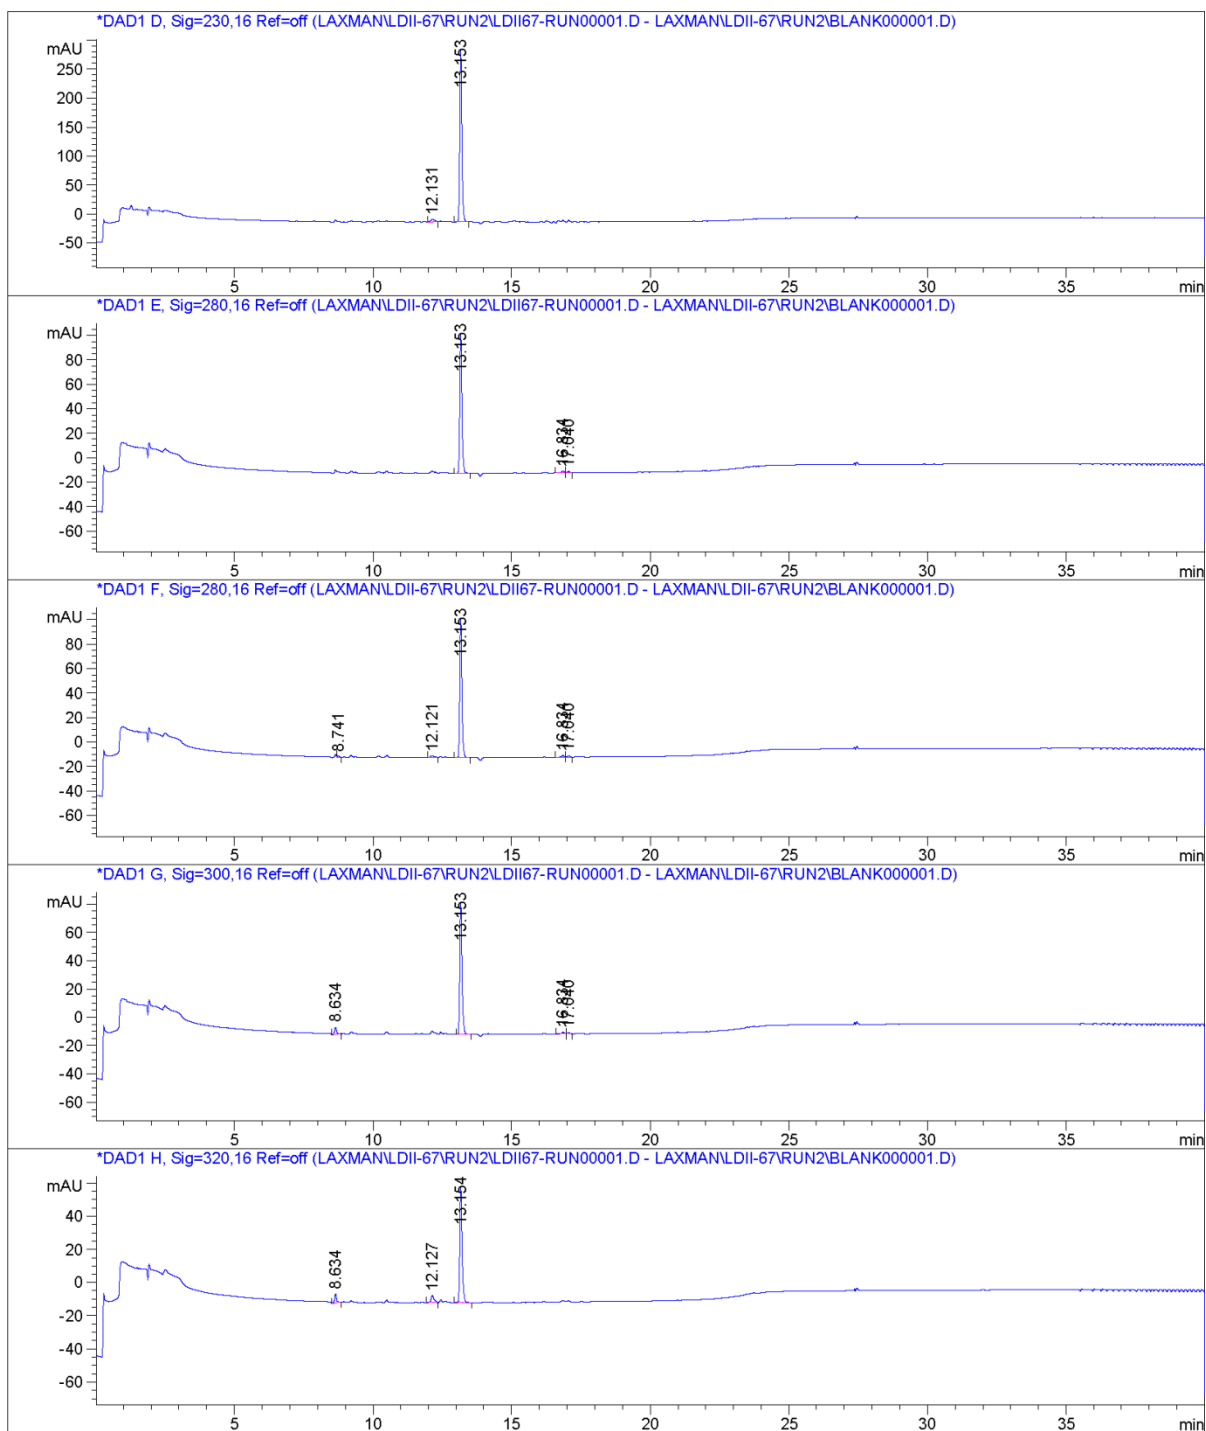

=====  
Area Percent Report  
=====

Sorted By : Signal  
Multiplier : 1.0000  
Dilution : 1.0000  
Use Multiplier & Dilution Factor with ISTDs

Signal 1: DAD1 A, Sig=254,4 Ref=off  
Signal has been modified after loading from rawdata file!

| Peak # | RetTime [min] | Type | Width [min] | Area [mAU*s] | Height [mAU] | Area %  |
|--------|---------------|------|-------------|--------------|--------------|---------|
| 1      | 13.153        | BB   | 0.0801      | 684.21429    | 128.44377    | 95.8285 |
| 2      | 16.833        | BV   | 0.1042      | 18.81558     | 2.54608      | 2.6352  |
| 3      | 17.041        | VB   | 0.0833      | 10.96856     | 2.02302      | 1.5362  |

Totals : 713.99843 133.01288

Signal 2: DAD1 B, Sig=254,16 Ref=off  
Signal has been modified after loading from rawdata file!

| Peak # | RetTime [min] | Type | Width [min] | Area [mAU*s] | Height [mAU] | Area %  |
|--------|---------------|------|-------------|--------------|--------------|---------|
| 1      | 13.153        | BB   | 0.0801      | 715.88000    | 134.46823    | 95.9599 |
| 2      | 16.833        | BV   | 0.1076      | 19.28228     | 2.51098      | 2.5847  |
| 3      | 17.041        | VB   | 0.0835      | 10.85781     | 1.99546      | 1.4554  |

Totals : 746.02010 138.97467

Signal 3: DAD1 C, Sig=210,8 Ref=off  
Signal has been modified after loading from rawdata file!

| Peak # | RetTime [min] | Type | Width [min] | Area [mAU*s] | Height [mAU] | Area %  |
|--------|---------------|------|-------------|--------------|--------------|---------|
| 1      | 13.153        | BB   | 0.0786      | 2124.96387   | 408.88397    | 98.1593 |
| 2      | 16.112        | BV   | 0.1162      | 16.52923     | 1.96462      | 0.7635  |
| 3      | 16.238        | VB   | 0.1149      | 15.90247     | 1.95409      | 0.7346  |
| 4      | 16.509        | BB   | 0.0770      | 7.41531      | 1.63260      | 0.3425  |

Totals : 2164.81088 414.43528



Data File C:\CHEM32\1\DATA\LAXMAN\LDII-67\RUN2\LDII67-RUN00001.D  
Sample Name: LD-II-67-1-run2

Signal 4: DAD1 D, Sig=230,16 Ref=off  
Signal has been modified after loading from rawdata file!

| Peak # | RetTime [min] | Type | Width [min] | Area [mAU*s] | Height [mAU] | Area %  |
|--------|---------------|------|-------------|--------------|--------------|---------|
| 1      | 12.131        | VV   | 0.1468      | 52.76670     | 4.93102      | 3.2789  |
| 2      | 13.153        | BB   | 0.0790      | 1556.49365   | 297.68036    | 96.7211 |

Totals : 1609.26036 302.61138

Signal 5: DAD1 E, Sig=280,16 Ref=off  
Signal has been modified after loading from rawdata file!

| Peak # | RetTime [min] | Type | Width [min] | Area [mAU*s] | Height [mAU] | Area %  |
|--------|---------------|------|-------------|--------------|--------------|---------|
| 1      | 13.153        | BB   | 0.0796      | 603.33063    | 114.21896    | 97.2505 |
| 2      | 16.834        | BV   | 0.0993      | 10.60114     | 1.56055      | 1.7088  |
| 3      | 17.040        | VB   | 0.0835      | 6.45647      | 1.18643      | 1.0407  |

Totals : 620.38824 116.96593

Signal 6: DAD1 F, Sig=280,16 Ref=off  
Signal has been modified after loading from rawdata file!

| Peak # | RetTime [min] | Type | Width [min] | Area [mAU*s] | Height [mAU] | Area %  |
|--------|---------------|------|-------------|--------------|--------------|---------|
| 1      | 8.741         | VB   | 0.0797      | 5.59504      | 1.05788      | 0.8730  |
| 2      | 12.121        | BB   | 0.1405      | 14.87934     | 1.48978      | 2.3218  |
| 3      | 13.153        | BB   | 0.0796      | 603.33063    | 114.21896    | 94.1435 |
| 4      | 16.834        | BV   | 0.0993      | 10.60114     | 1.56055      | 1.6542  |
| 5      | 17.040        | VB   | 0.0835      | 6.45647      | 1.18643      | 1.0075  |

Totals : 640.86262 119.51359

Signal 7: DAD1 G, Sig=300,16 Ref=off  
Signal has been modified after loading from rawdata file!

| Peak # | RetTime [min] | Type | Width [min] | Area [mAU*s] | Height [mAU] | Area %  |
|--------|---------------|------|-------------|--------------|--------------|---------|
| 1      | 8.634         | BB   | 0.0769      | 27.28100     | 5.22612      | 4.8981  |
| 2      | 13.153        | BB   | 0.0824      | 514.18933    | 93.18947     | 92.3180 |
| 3      | 16.834        | BV   | 0.1026      | 9.83546      | 1.35601      | 1.7659  |

Data File C:\CHEM32\1\DATA\LAXMAN\LDII-67\RUN2\LDII67-RUN00001.D  
Sample Name: LD-II-67-1-run2

| Peak # | RetTime [min] | Type | Width [min] | Area [mAU*s] | Height [mAU] | Area % |
|--------|---------------|------|-------------|--------------|--------------|--------|
| 4      | 17.040        | VB   | 0.0835      | 5.67047      | 1.04138      | 1.0181 |

Totals : 556.97626 100.81297

Signal 8: DAD1 H, Sig=320,16 Ref=off  
Signal has been modified after loading from rawdata file!

| Peak # | RetTime [min] | Type | Width [min] | Area [mAU*s] | Height [mAU] | Area %  |
|--------|---------------|------|-------------|--------------|--------------|---------|
| 1      | 8.634         | BB   | 0.0773      | 29.33656     | 5.58494      | 6.4560  |
| 2      | 12.127        | BB   | 0.1151      | 33.01547     | 4.22876      | 7.2656  |
| 3      | 13.154        | BB   | 0.0836      | 392.05457    | 69.73837     | 86.2784 |

Totals : 454.40660 79.55207

=====  
\*\*\* End of Report \*\*\*

$^1\text{H}$  NMR ( $\text{CDCl}_3$ , 500 MHz) Compound **8**

7.260  
6.671  
6.654  
6.536  
6.512  
6.504  
6.489  
6.480  
6.399  
6.382

3.834  
3.807  
3.617  
3.489

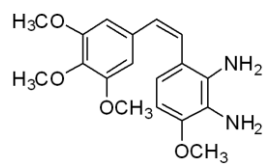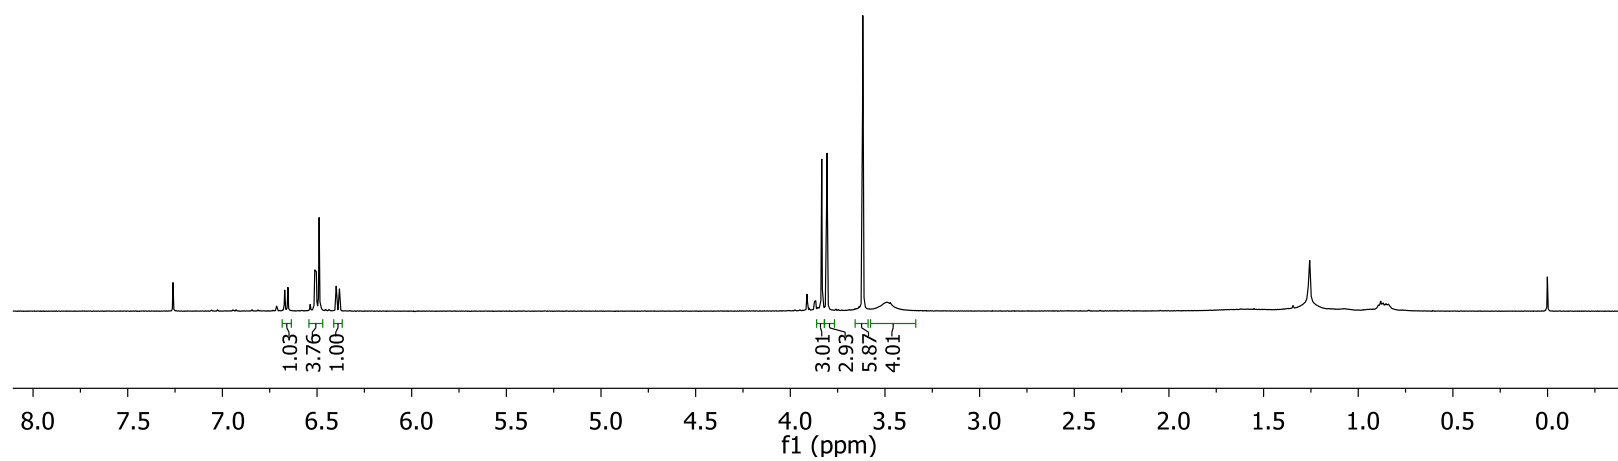

<sup>13</sup>C NMR (CDCl<sub>3</sub>, 125 MHz) Compound 8

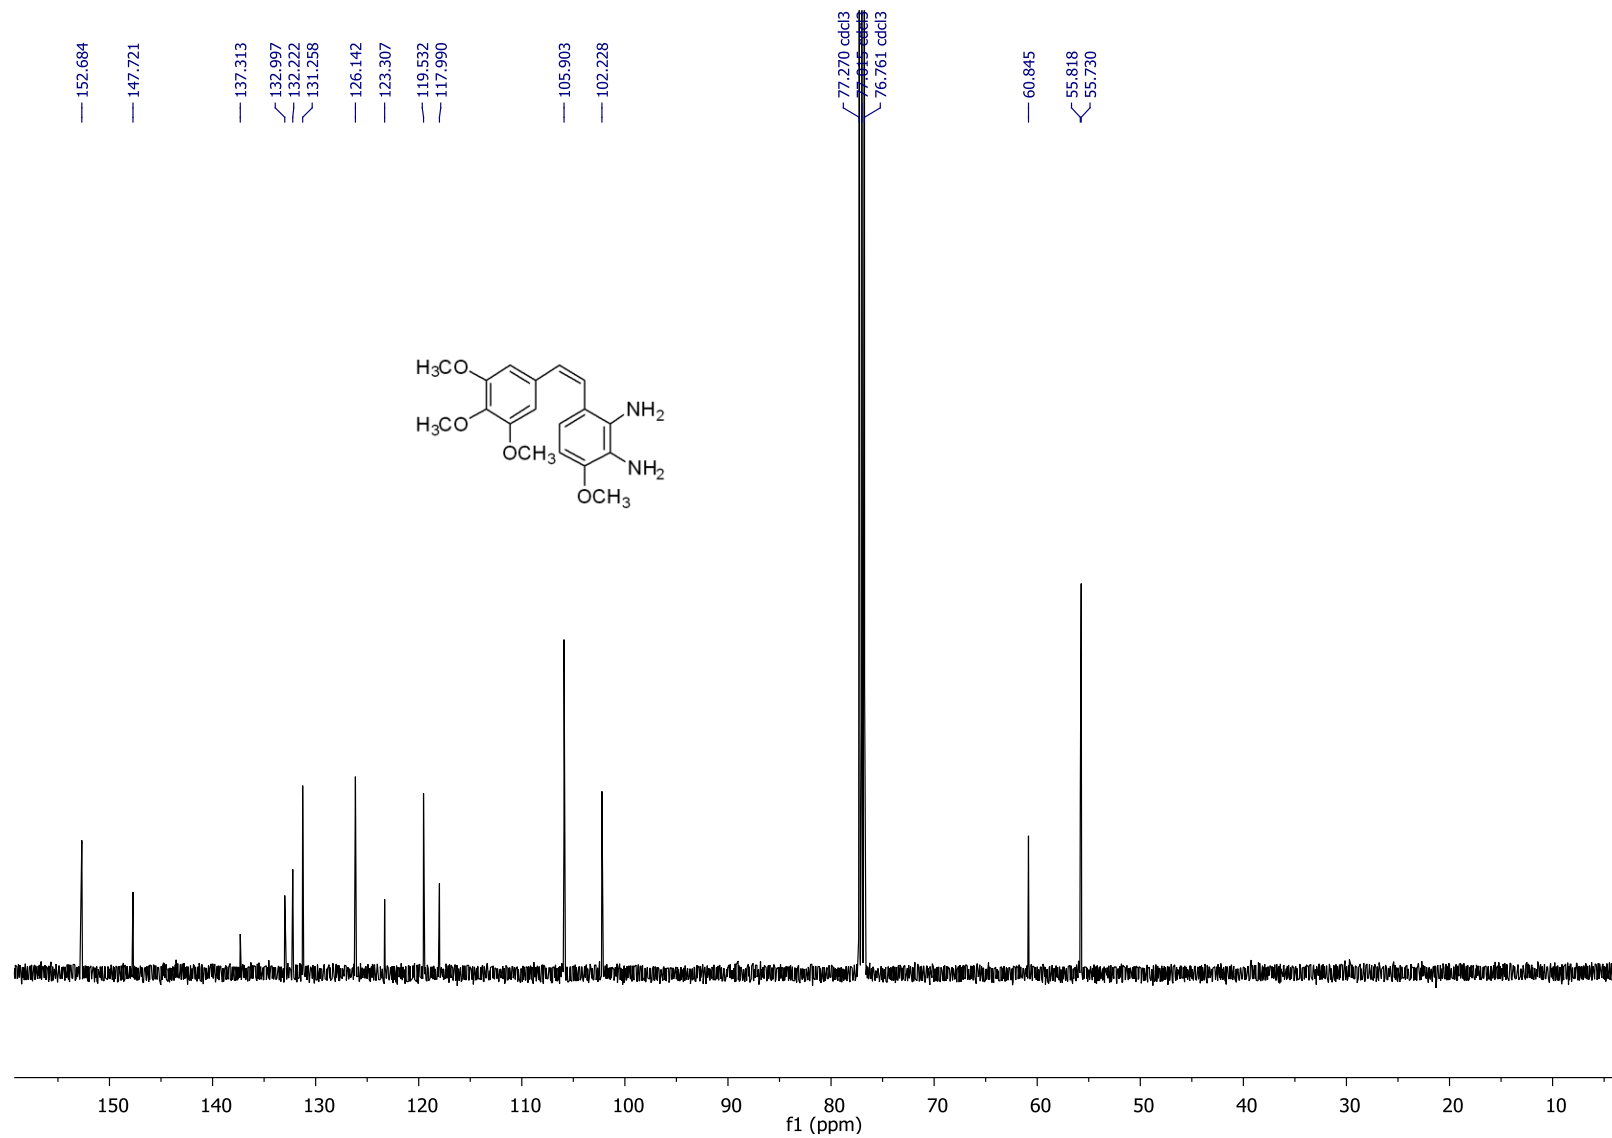

# HRMS Compound 8

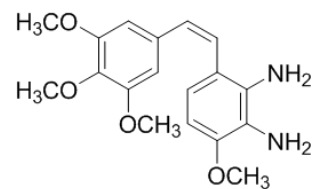

Chemical Formula:  $C_{18}H_{22}N_2O_4$   
Exact Mass: 330.1580

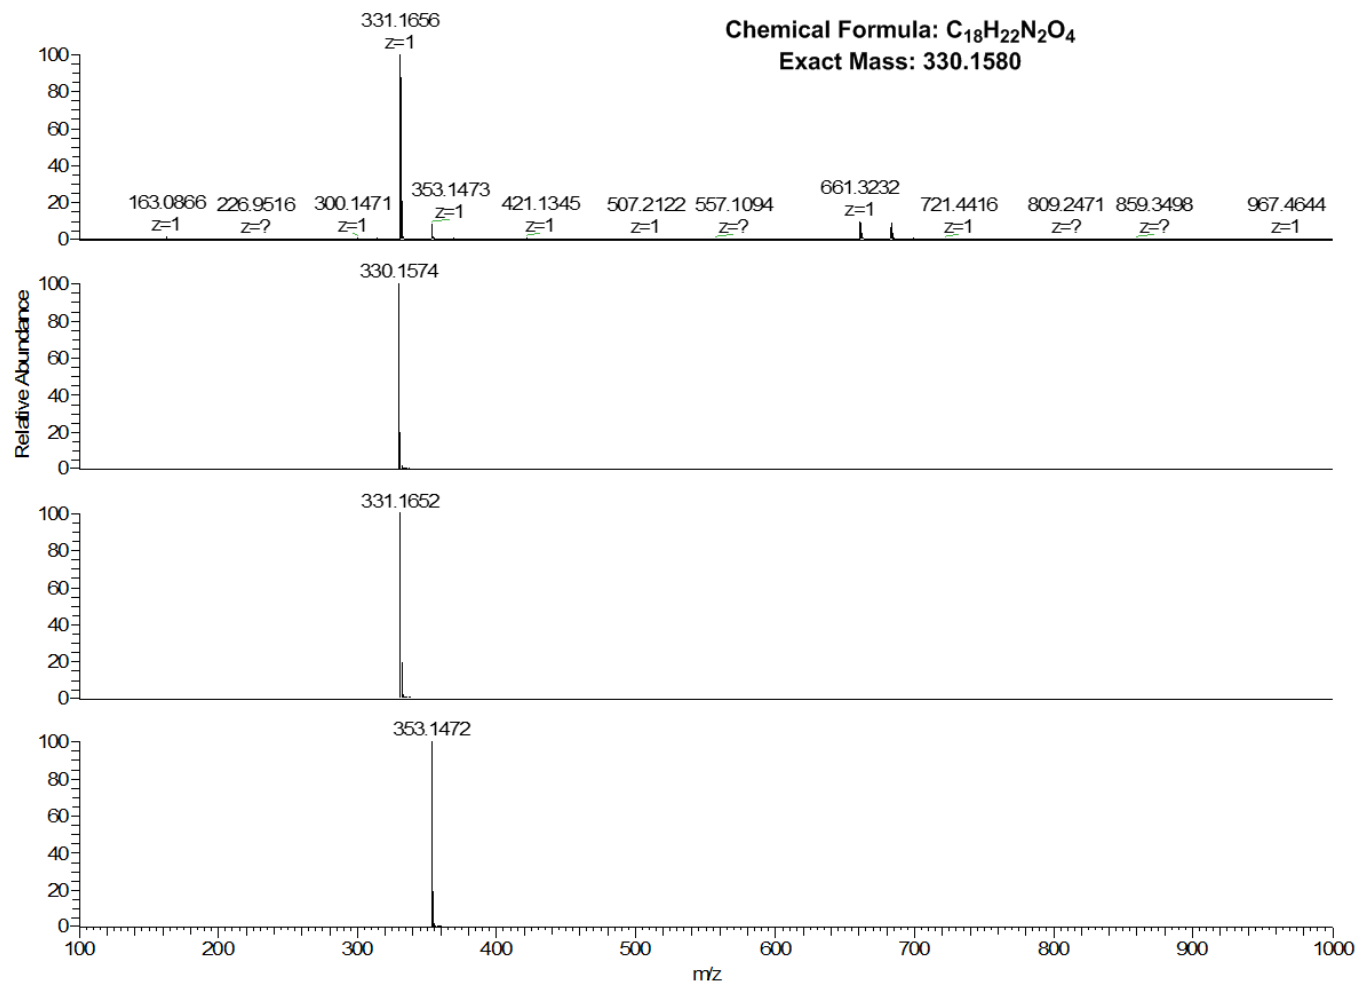

NL:  
1.10E8  
LD-VI-107-  
1A\_141007125744#1  
2 RT: 0.09 AV: 1 T:  
FTMS + p ESI Full ms  
[100.00-1000.00]

NL:  
8.08E5  
 $C_{18}H_{22}N_2O_4$ :  
 $C_{18}H_{22}N_2O_4$   
pa Chrg 1

NL:  
8.08E5  
 $C_{18}H_{22}N_2O_4 + H$ :  
 $C_{18}H_{23}N_2O_4$   
pa Chrg 1

NL:  
8.08E5  
 $C_{18}H_{22}N_2O_4 + Na$ :  
 $C_{18}H_{22}N_2O_4 Na_1$   
pa Chrg 1

# HPLC for Compound 8

Data File C:\CHEM32\1\DATA\LAXMAN\JPT1-24-RUN1001.D  
Sample Name: JPT-I-24-2- run1

=====  
Acq. Operator : Laxman  
Acq. Instrument : Instrument 1 Location : -  
Injection Date : 3/8/2013 11:34:37 AM  
Acq. Method : C:\CHEM32\1\METHODS\MASTERMETHOD.M  
Last changed : 3/8/2013 10:58:56 AM by Laxman  
Analysis Method : C:\CHEM32\1\DATA\LAXMAN\JPT1-24-RUN1001.D\DA.M (MASTERMETHOD.M)  
Last changed : 3/8/2013 12:22:23 PM by Laxman  
(modified after loading)  
Sample Info : CA1 Diamine  
Run 1 - 10% ACN/Water

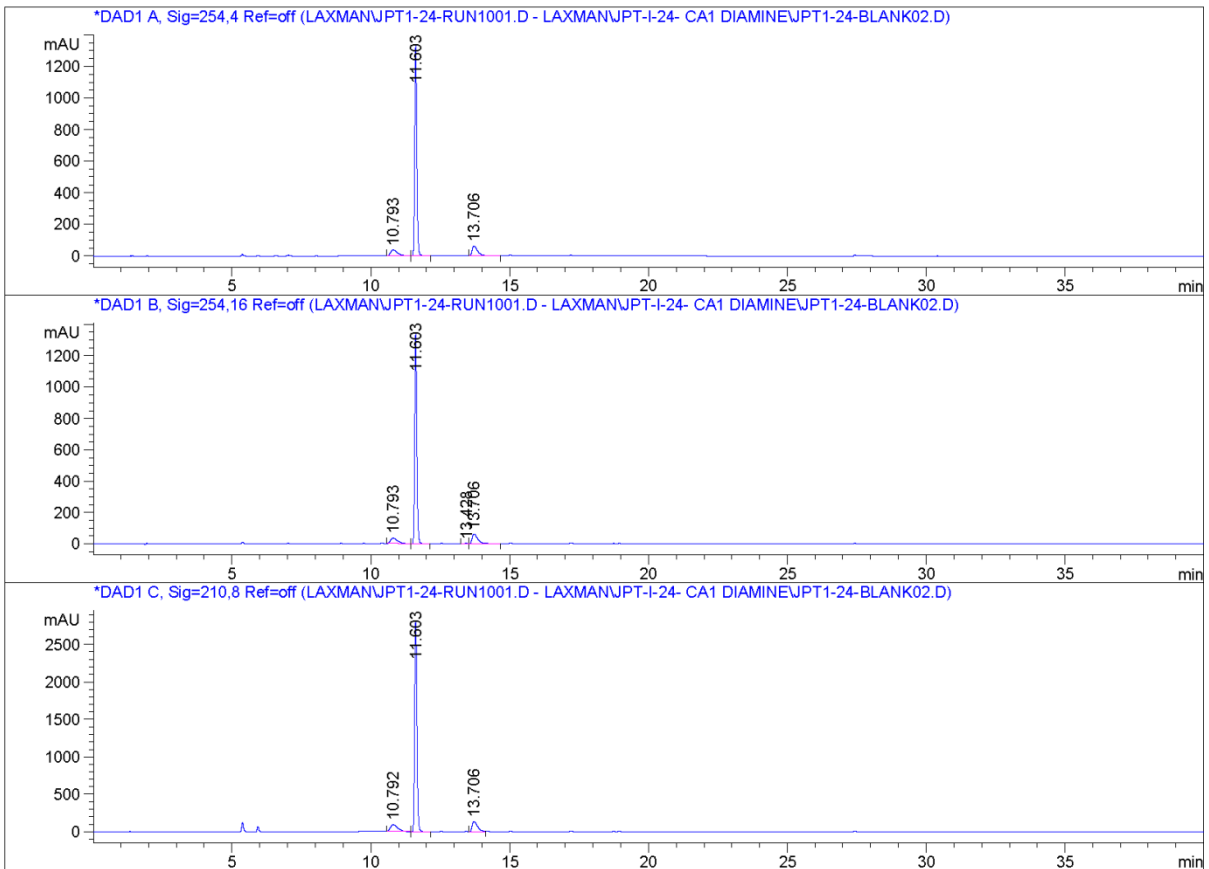

Data File C:\CHEM32\1\DATA\LAXMAN\JPT1-24-RUN1001.D  
Sample Name: JPT-I-24-2- run1

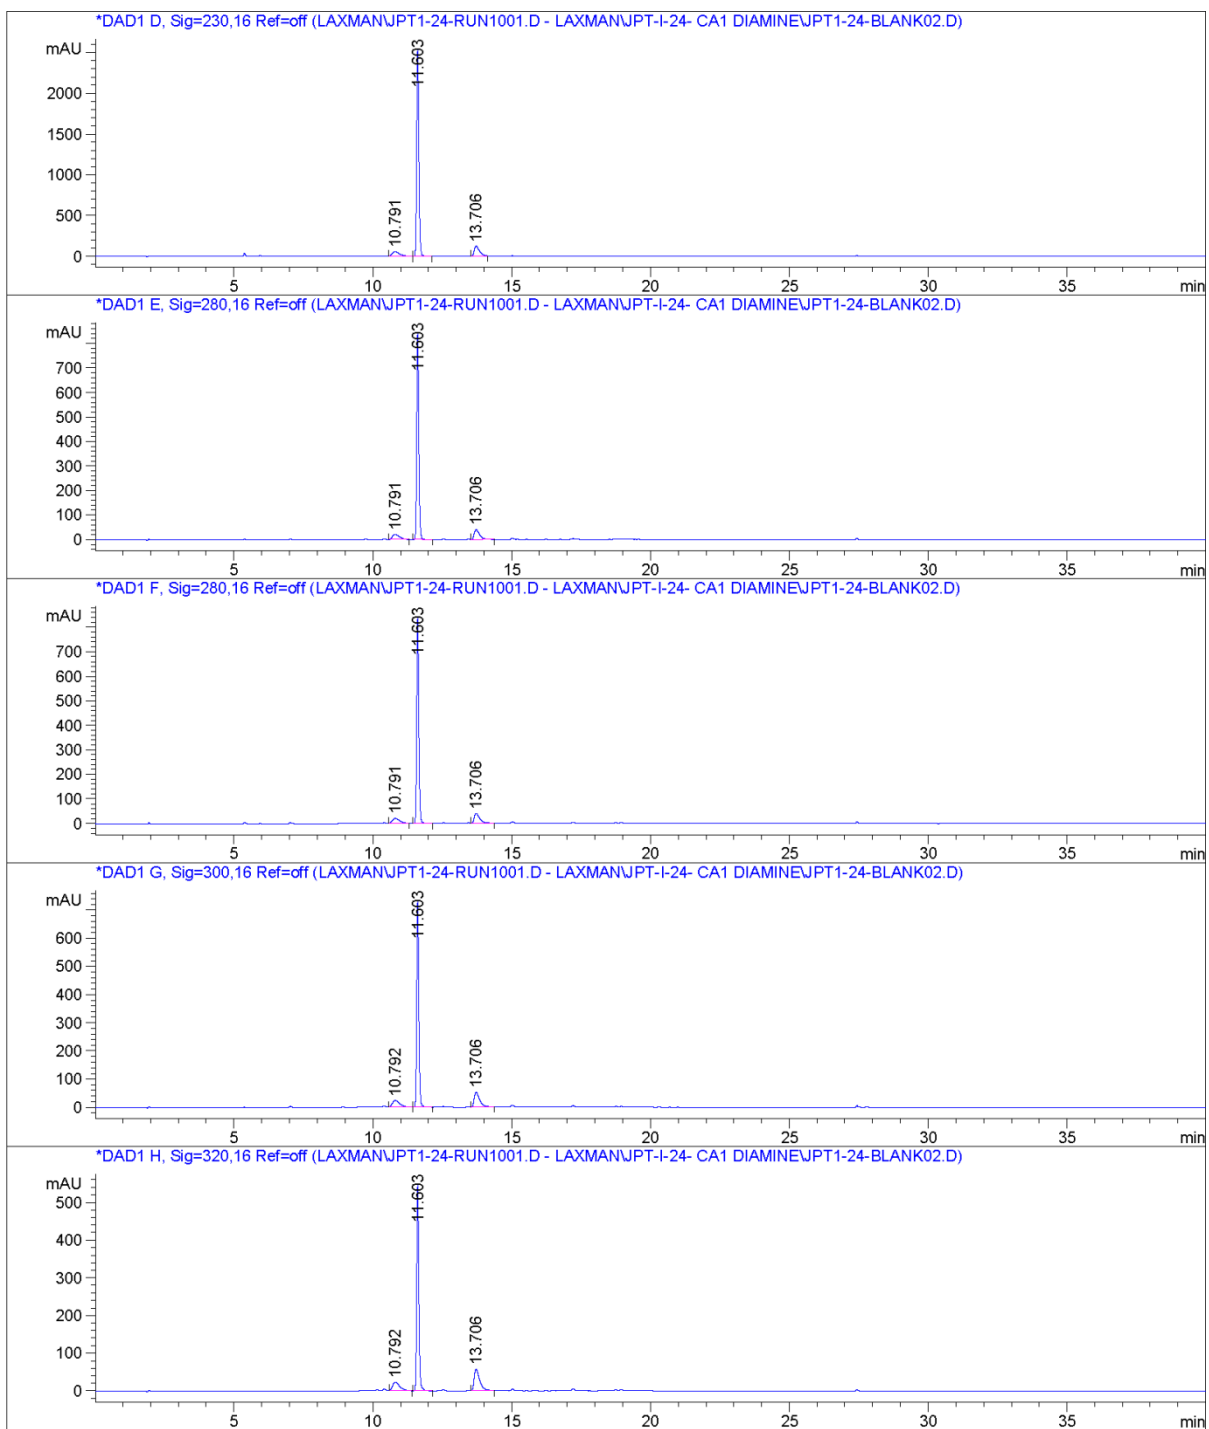

=====  
Area Percent Report  
=====

Sorted By : Signal  
Multiplier : 1.0000  
Dilution : 1.0000  
Use Multiplier & Dilution Factor with ISTDs

Signal 1: DAD1 A, Sig=254,4 Ref=off  
Signal has been modified after loading from rawdata file!

| Peak # | RetTime [min] | Type | Width [min] | Area [mAU*s] | Height [mAU] | Area %  |
|--------|---------------|------|-------------|--------------|--------------|---------|
| 1      | 10.793        | VB   | 0.2658      | 636.82605    | 36.46028     | 7.4422  |
| 2      | 11.603        | BB   | 0.0813      | 7032.83594   | 1338.65552   | 82.1882 |
| 3      | 13.706        | VB   | 0.2133      | 887.33014    | 61.89165     | 10.3697 |

Totals : 8556.99213 1437.00745

Signal 2: DAD1 B, Sig=254,16 Ref=off  
Signal has been modified after loading from rawdata file!

| Peak # | RetTime [min] | Type | Width [min] | Area [mAU*s] | Height [mAU] | Area %  |
|--------|---------------|------|-------------|--------------|--------------|---------|
| 1      | 10.793        | VB   | 0.2683      | 634.71381    | 36.23970     | 7.3312  |
| 2      | 11.603        | BB   | 0.0813      | 7088.87402   | 1349.12854   | 81.8791 |
| 3      | 13.428        | BV   | 0.1080      | 28.47644     | 3.95348      | 0.3289  |
| 4      | 13.706        | VB   | 0.2133      | 905.67200    | 63.14117     | 10.4608 |

Totals : 8657.73626 1452.46289

Signal 3: DAD1 C, Sig=210,8 Ref=off  
Signal has been modified after loading from rawdata file!

| Peak # | RetTime [min] | Type | Width [min] | Area [mAU*s] | Height [mAU] | Area %  |
|--------|---------------|------|-------------|--------------|--------------|---------|
| 1      | 10.792        | BB   | 0.2721      | 1686.11475   | 93.64143     | 8.4590  |
| 2      | 11.603        | BB   | 0.0918      | 1.63806e4    | 2819.08179   | 82.1797 |
| 3      | 13.706        | VV   | 0.2051      | 1865.96326   | 136.85098    | 9.3613  |

Totals : 1.99327e4 3049.57420



Data File C:\CHEM32\1\DATA\LAXMAN\JPT1-24-RUN1001.D  
Sample Name: JPT-I-24-2- run1

Signal 4: DAD1 D, Sig=230,16 Ref=off  
Signal has been modified after loading from rawdata file!

| Peak # | RetTime [min] | Type | Width [min] | Area [mAU*s] | Height [mAU] | Area %  |
|--------|---------------|------|-------------|--------------|--------------|---------|
| 1      | 10.791        | VB   | 0.2794      | 1063.52295   | 56.54724     | 6.3234  |
| 2      | 11.603        | BB   | 0.0863      | 1.40428e4    | 2549.48462   | 83.4944 |
| 3      | 13.706        | VV   | 0.2068      | 1712.51416   | 124.25601    | 10.1821 |

Totals : 1.68188e4 2730.28787

Signal 5: DAD1 E, Sig=280,16 Ref=off  
Signal has been modified after loading from rawdata file!

| Peak # | RetTime [min] | Type | Width [min] | Area [mAU*s] | Height [mAU] | Area %  |
|--------|---------------|------|-------------|--------------|--------------|---------|
| 1      | 10.791        | VB   | 0.2803      | 362.46127    | 19.91856     | 6.7384  |
| 2      | 11.603        | BB   | 0.0812      | 4438.77637   | 845.72125    | 82.5199 |
| 3      | 13.706        | VB   | 0.2105      | 577.80243    | 40.99035     | 10.7417 |

Totals : 5379.04007 906.63016

Signal 6: DAD1 F, Sig=280,16 Ref=off  
Signal has been modified after loading from rawdata file!

| Peak # | RetTime [min] | Type | Width [min] | Area [mAU*s] | Height [mAU] | Area %  |
|--------|---------------|------|-------------|--------------|--------------|---------|
| 1      | 10.791        | VB   | 0.2803      | 362.46127    | 19.91856     | 6.7384  |
| 2      | 11.603        | BB   | 0.0812      | 4438.77637   | 845.72125    | 82.5199 |
| 3      | 13.706        | VB   | 0.2105      | 577.80243    | 40.99035     | 10.7417 |

Totals : 5379.04007 906.63016

Signal 7: DAD1 G, Sig=300,16 Ref=off  
Signal has been modified after loading from rawdata file!

| Peak # | RetTime [min] | Type | Width [min] | Area [mAU*s] | Height [mAU] | Area %  |
|--------|---------------|------|-------------|--------------|--------------|---------|
| 1      | 10.792        | VB   | 0.2793      | 422.46881    | 23.11047     | 8.3678  |
| 2      | 11.603        | BB   | 0.0815      | 3879.14600   | 736.06525    | 76.8335 |
| 3      | 13.706        | VB   | 0.2095      | 747.15320    | 53.30036     | 14.7987 |

Data File C:\CHEM32\1\DATA\LAXMAN\JPT1-24-RUN1001.D  
Sample Name: JPT-I-24-2- run1

Totals : 5048.76801 812.47607

Signal 8: DAD1 H, Sig=320,16 Ref=off  
Signal has been modified after loading from rawdata file!

| Peak # | RetTime [min] | Type | Width [min] | Area [mAU*s] | Height [mAU] | Area %  |
|--------|---------------|------|-------------|--------------|--------------|---------|
| 1      | 10.792        | VB   | 0.2743      | 400.08136    | 22.62302     | 9.6661  |
| 2      | 11.603        | BB   | 0.0822      | 2933.52075   | 549.82037    | 70.8749 |
| 3      | 13.706        | VB   | 0.2086      | 805.40729    | 57.80400     | 19.4589 |

Totals : 4139.00940 630.24739

=====  
\*\*\* End of Report \*\*\*

<sup>1</sup>H NMR (CD<sub>3</sub>OD, 500 MHz) Compound **9**

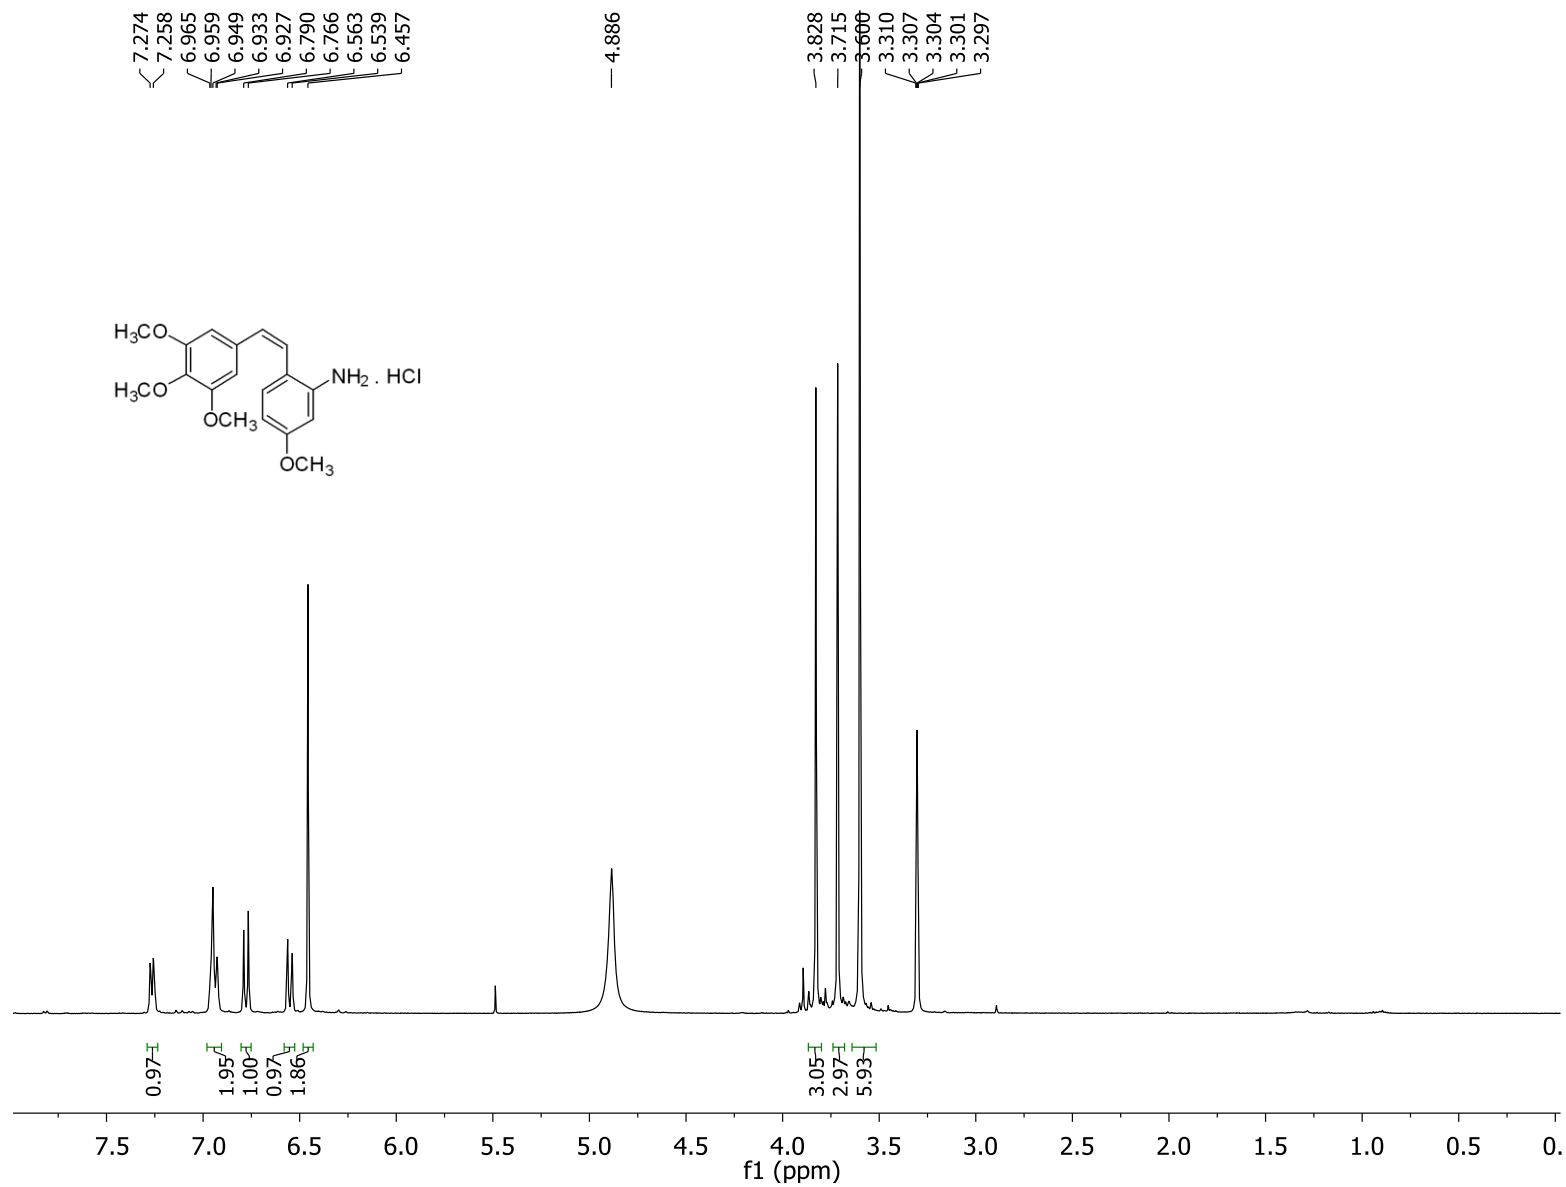

S35

<sup>13</sup>C NMR (CD<sub>3</sub>OD, 125 MHz) Compound **9**

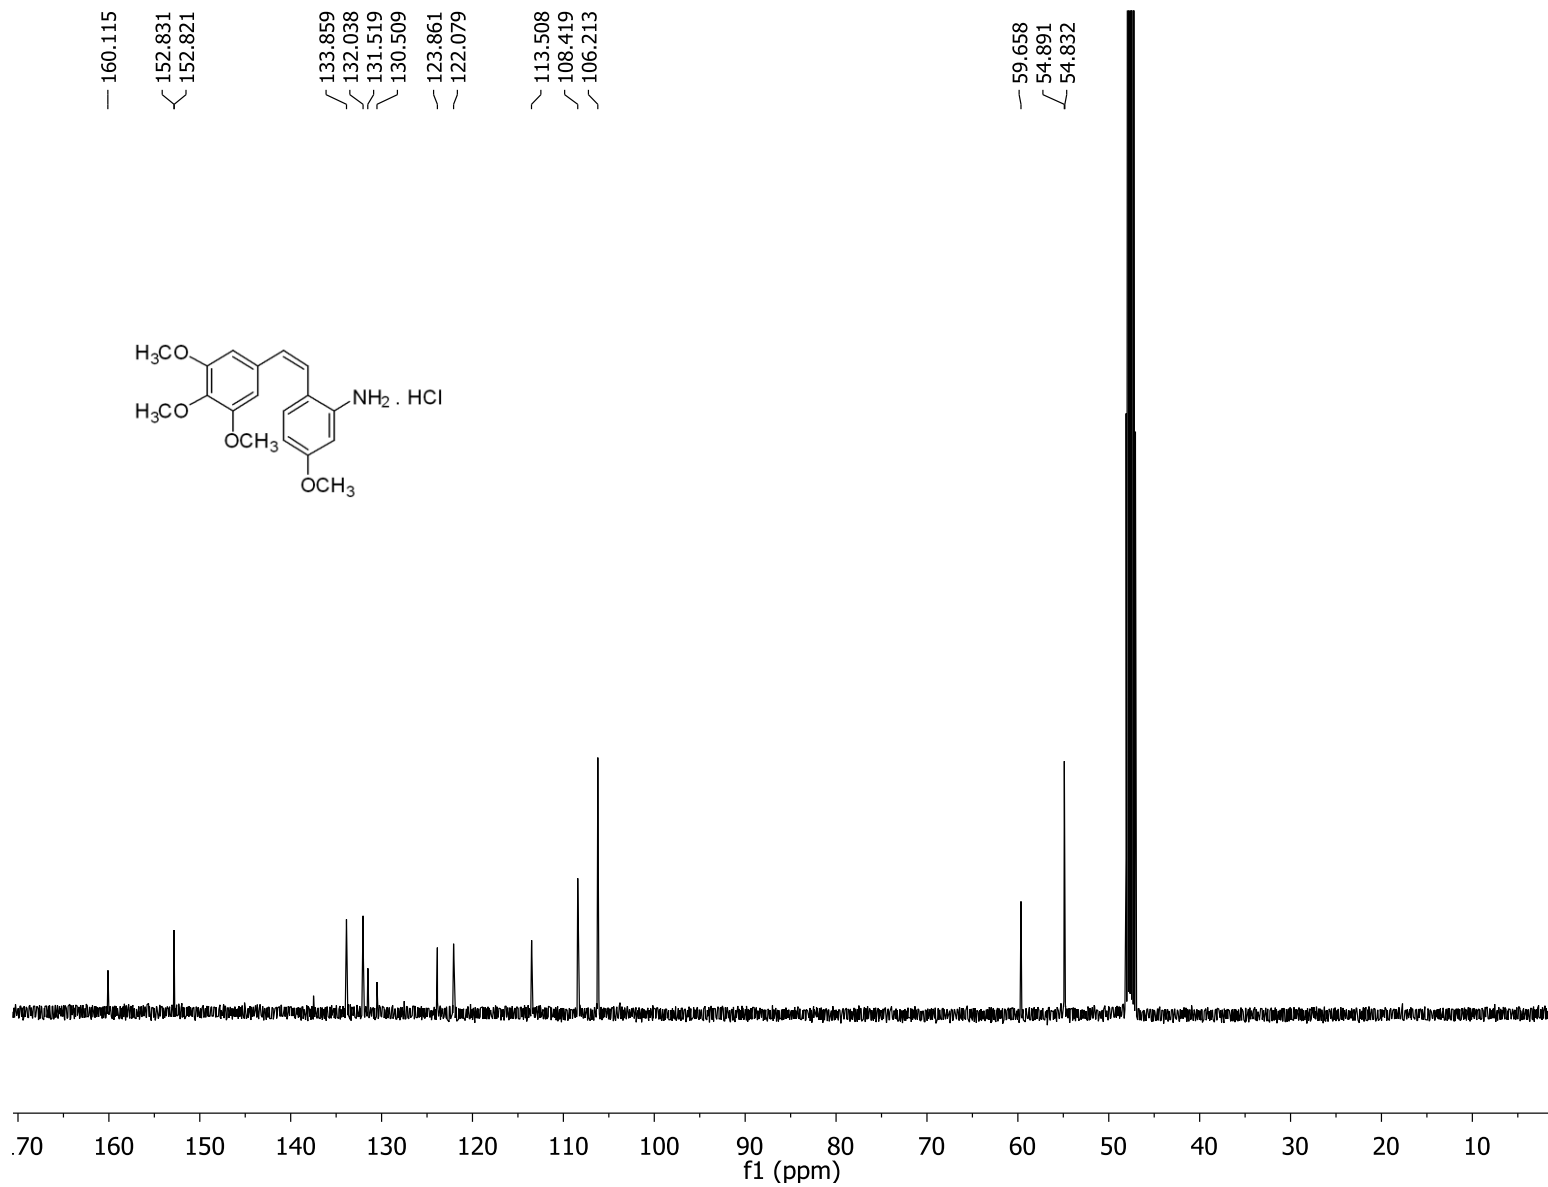

# HRMS Compound 9

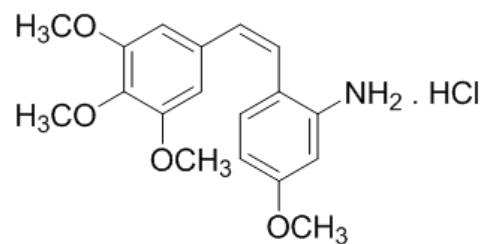

**Chemical Formula: C<sub>18</sub>H<sub>22</sub>ClNO<sub>4</sub>**  
**Exact Mass: 351.1237**

NL:  
1.13E8  
LD-V-77\_Orbi\_+ESI#1  
RT: 0.00 AV: 1 T:  
FTMS +p ESI Full ms  
[100.00-1000.00]

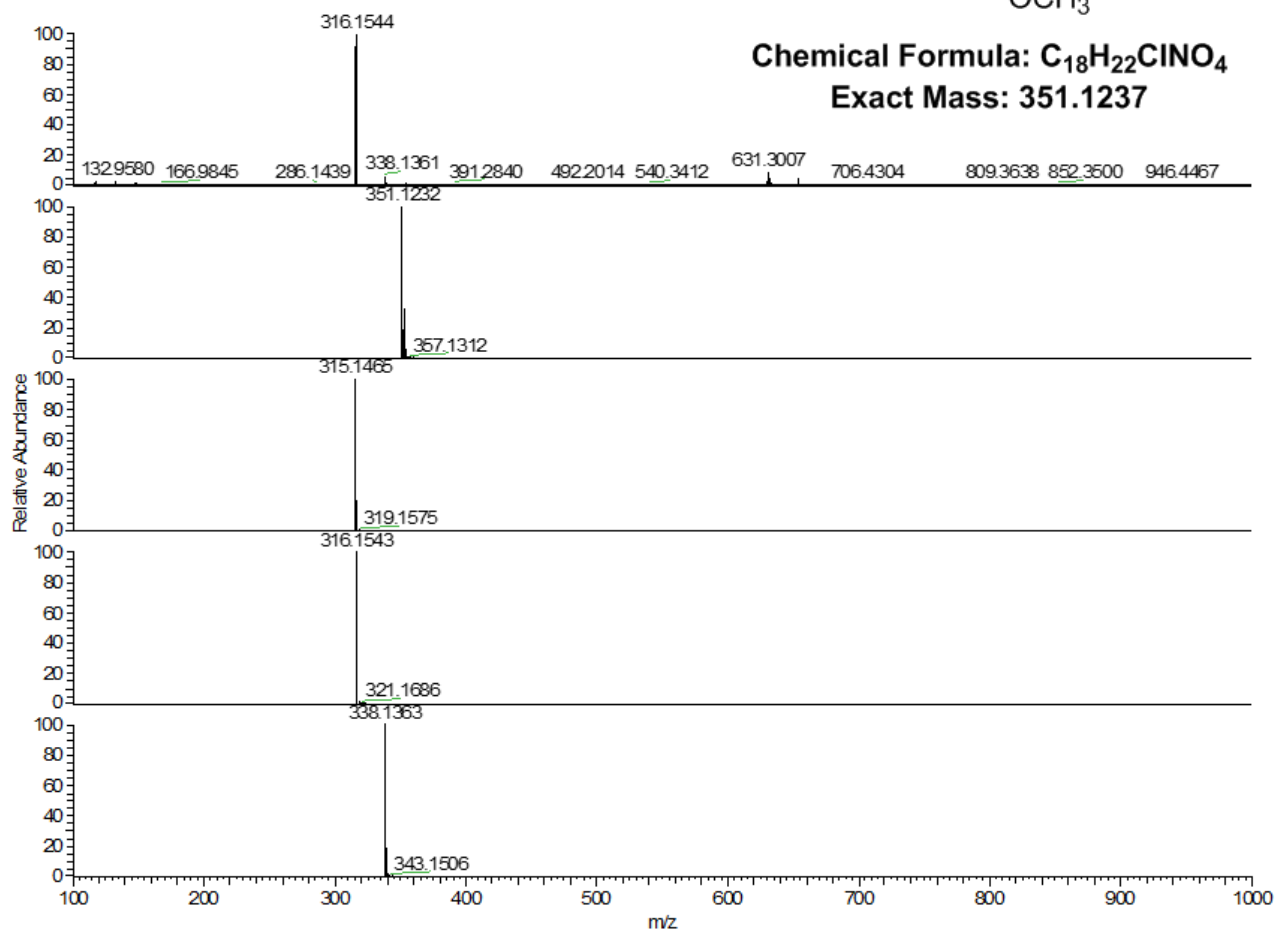

NL:  
6.15E5  
C<sub>18</sub>H<sub>22</sub>ClNO<sub>4</sub>:  
C<sub>18</sub>H<sub>22</sub>Cl<sub>1</sub>N<sub>1</sub>O<sub>4</sub>  
pa Chrg 1

NL:  
8.11E5  
C<sub>18</sub>H<sub>21</sub>NO<sub>4</sub>:  
C<sub>18</sub>H<sub>21</sub>N<sub>1</sub>O<sub>4</sub>  
pa Chrg 1

NL:  
8.11E5  
C<sub>18</sub>H<sub>21</sub>NO<sub>4</sub>+H:  
C<sub>18</sub>H<sub>22</sub>N<sub>1</sub>O<sub>4</sub>  
pa Chrg 1

NL:  
8.11E5  
C<sub>18</sub>H<sub>21</sub>NO<sub>4</sub>+Na:  
C<sub>18</sub>H<sub>21</sub>N<sub>1</sub>O<sub>4</sub>Na<sub>1</sub>  
pa Chrg 1

# HPLC for Compound 9

Data File C:\CHEM32\1\DATA\LAXMAN\LD-V-77-RUN0001.D  
Sample Name: LD-V-77-1A-run1

```
=====
Acq. Operator   : Laxman
Acq. Instrument : Instrument 1           Location : -
Injection Date  : 7/23/2014 10:58:30 AM
Acq. Method     : C:\CHEM32\1\METHODS\MASTERMETHOD.M
Last changed    : 7/23/2014 10:57:14 AM by Laxman
Analysis Method : C:\CHEM32\1\DATA\LAXMAN\LD-V-77-RUN0001.D\DA.M (MASTERMETHOD.M)
Last changed    : 7/23/2014 11:48:44 AM by Laxman
Sample Info     : Method- Mastermethod
```

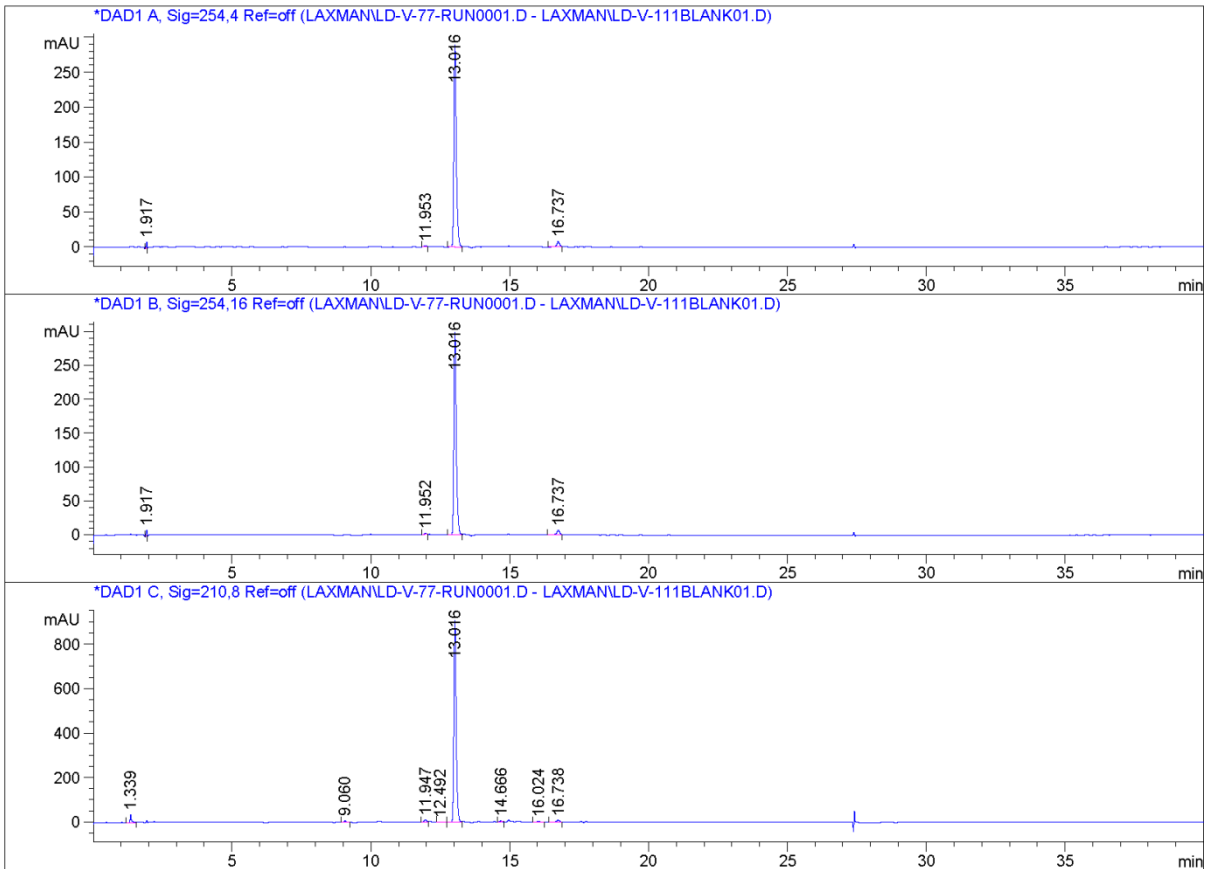

Data File C:\CHEM32\1\DATA\LAXMAN\LD-V-77-RUN0001.D  
Sample Name: LD-V-77-1A-run1

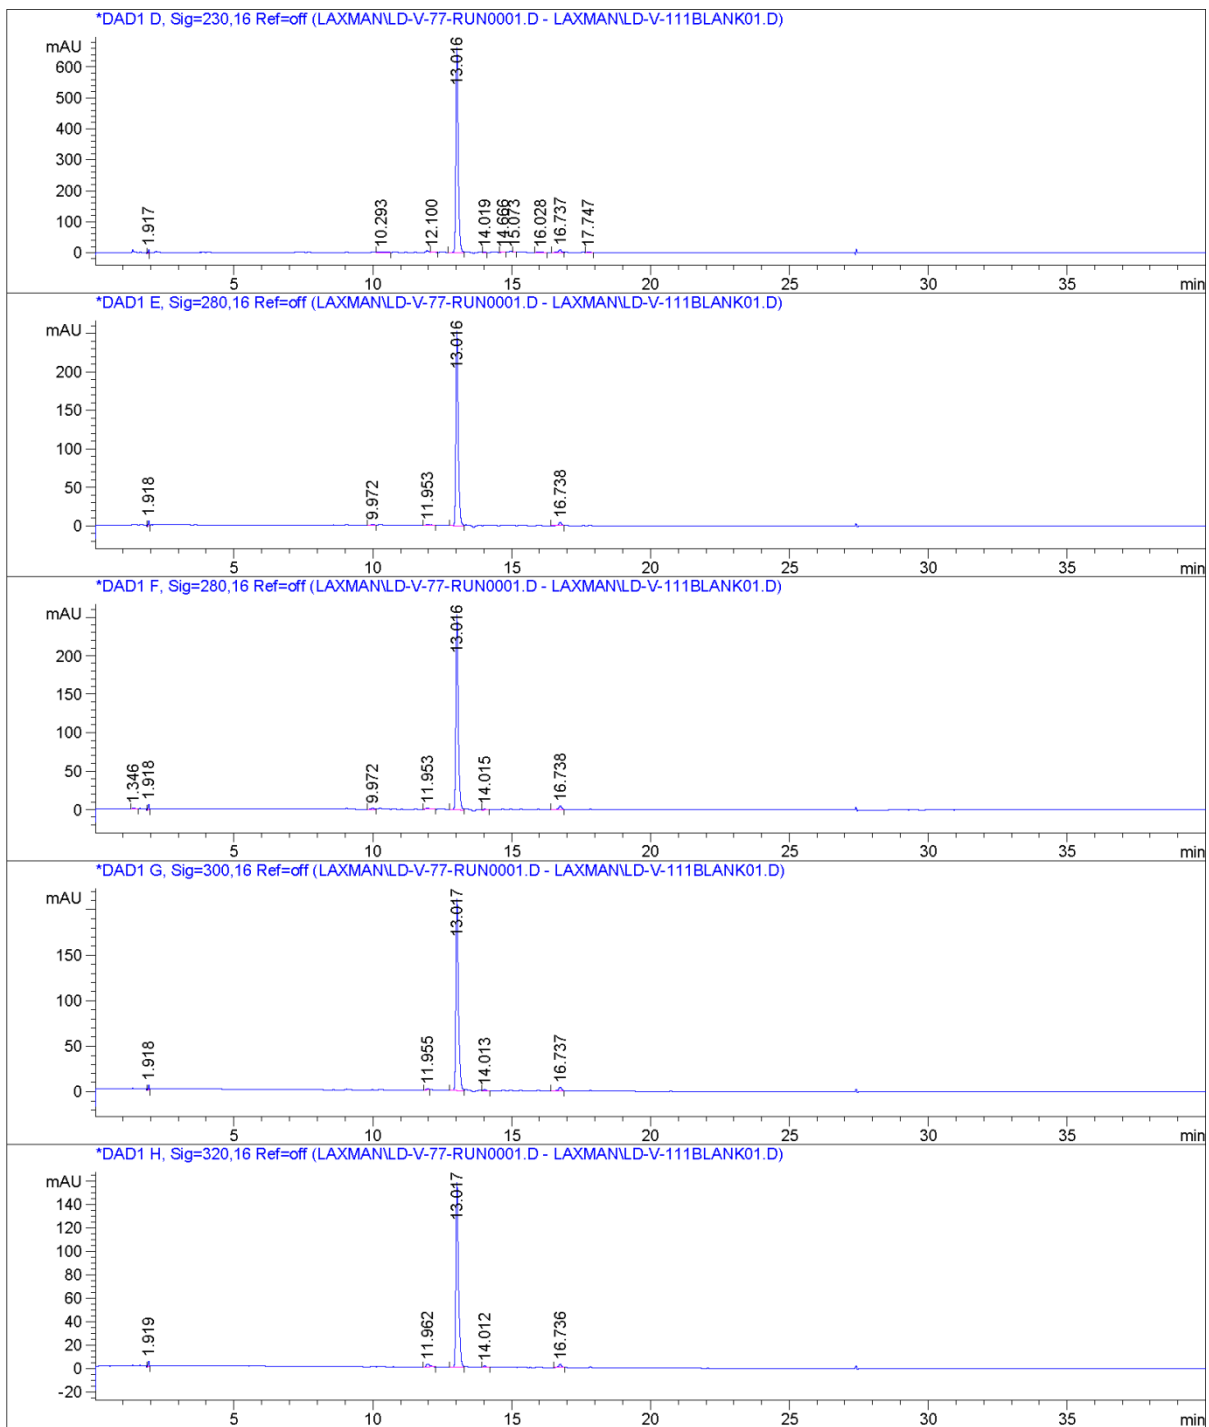

Data File C:\CHEM32\1\DATA\LAXMAN\LD-V-77-RUN0001.D  
Sample Name: LD-V-77-1A-run1

=====  
Area Percent Report  
=====

Sorted By : Signal  
Multiplier : 1.0000  
Dilution : 1.0000  
Use Multiplier & Dilution Factor with ISTDs

Signal 1: DAD1 A, Sig=254,4 Ref=off  
Signal has been modified after loading from rawdata file!

| Peak #   | RetTime [min] | Type | Width [min] | Area [mAU*s] | Height [mAU] | Area %  |
|----------|---------------|------|-------------|--------------|--------------|---------|
| 1        | 1.917         | BB   | 0.0398      | 21.88001     | 9.19392      | 1.2022  |
| 2        | 11.953        | BB   | 0.0959      | 9.57182      | 1.59724      | 0.5259  |
| 3        | 13.016        | BV   | 0.0896      | 1734.00476   | 290.73328    | 95.2719 |
| 4        | 16.737        | BV   | 0.1027      | 54.60278     | 7.70488      | 3.0001  |
| Totals : |               |      |             | 1820.05937   | 309.22931    |         |

Signal 2: DAD1 B, Sig=254,16 Ref=off  
Signal has been modified after loading from rawdata file!

| Peak #   | RetTime [min] | Type | Width [min] | Area [mAU*s] | Height [mAU] | Area %  |
|----------|---------------|------|-------------|--------------|--------------|---------|
| 1        | 1.917         | BB   | 0.0398      | 21.54620     | 9.05059      | 1.1550  |
| 2        | 11.952        | BB   | 0.0936      | 10.00687     | 1.67807      | 0.5364  |
| 3        | 13.016        | BV   | 0.0894      | 1780.96240   | 299.31604    | 95.4728 |
| 4        | 16.737        | BV   | 0.1033      | 52.89812     | 7.40820      | 2.8357  |
| Totals : |               |      |             | 1865.41360   | 317.45291    |         |

Signal 3: DAD1 C, Sig=210,8 Ref=off  
Signal has been modified after loading from rawdata file!

| Peak # | RetTime [min] | Type | Width [min] | Area [mAU*s] | Height [mAU] | Area %  |
|--------|---------------|------|-------------|--------------|--------------|---------|
| 1      | 1.339         | BV   | 0.0678      | 178.51530    | 37.33842     | 3.1609  |
| 2      | 9.060         | VB   | 0.0861      | 49.31191     | 8.45259      | 0.8731  |
| 3      | 11.947        | BV   | 0.1015      | 70.69033     | 10.36870     | 1.2517  |
| 4      | 12.492        | VB   | 0.1447      | 22.89972     | 2.17788      | 0.4055  |
| 5      | 13.016        | BV   | 0.0865      | 5184.50049   | 909.86755    | 91.8002 |
| 6      | 14.666        | BB   | 0.0940      | 28.75089     | 4.79432      | 0.5091  |
| 7      | 16.024        | VB   | 0.1287      | 33.65904     | 3.61362      | 0.5960  |



Data File C:\CHEM32\1\DATA\LAXMAN\LD-V-77-RUN0001.D

Sample Name: LD-V-77-1A-run1

| Peak # | RetTime [min] | Type | Width [min] | Area [mAU*s] | Height [mAU] | Area % |
|--------|---------------|------|-------------|--------------|--------------|--------|
| 8      | 16.738        | BV   | 0.1192      | 79.26709     | 9.51872      | 1.4036 |

Totals : 5647.59478 986.13178

Signal 4: DAD1 D, Sig=230,16 Ref=off

Signal has been modified after loading from rawdata file!

| Peak # | RetTime [min] | Type | Width [min] | Area [mAU*s] | Height [mAU] | Area %  |
|--------|---------------|------|-------------|--------------|--------------|---------|
| 1      | 1.917         | BV   | 0.0412      | 27.87641     | 11.13194     | 0.6840  |
| 2      | 10.293        | VB   | 0.2294      | 37.74120     | 2.37437      | 0.9261  |
| 3      | 12.100        | VB   | 0.0996      | 12.79910     | 1.92545      | 0.3141  |
| 4      | 13.016        | BV   | 0.0878      | 3866.90088   | 665.83099    | 94.8834 |
| 5      | 14.019        | VB   | 0.0972      | 7.92666      | 1.22969      | 0.1945  |
| 6      | 14.666        | BB   | 0.0922      | 13.23263     | 2.19939      | 0.3247  |
| 7      | 15.073        | VB   | 0.0824      | 7.13054      | 1.37812      | 0.1750  |
| 8      | 16.028        | BB   | 0.1512      | 16.67805     | 1.46031      | 0.4092  |
| 9      | 16.737        | BV   | 0.1155      | 71.10069     | 8.87124      | 1.7446  |
| 10     | 17.747        | BB   | 0.1336      | 14.03684     | 1.44144      | 0.3444  |

Totals : 4075.42300 697.84294

Signal 5: DAD1 E, Sig=280,16 Ref=off

Signal has been modified after loading from rawdata file!

| Peak # | RetTime [min] | Type | Width [min] | Area [mAU*s] | Height [mAU] | Area %  |
|--------|---------------|------|-------------|--------------|--------------|---------|
| 1      | 1.918         | BB   | 0.0398      | 16.67188     | 6.99573      | 1.0558  |
| 2      | 9.972         | BV   | 0.1246      | 10.85515     | 1.31168      | 0.6874  |
| 3      | 11.953        | BB   | 0.1431      | 16.43839     | 1.61048      | 1.0410  |
| 4      | 13.016        | BV   | 0.0890      | 1503.59937   | 254.13380    | 95.2219 |
| 5      | 16.738        | BB   | 0.1006      | 31.48283     | 4.67115      | 1.9938  |

Totals : 1579.04762 268.72284

Signal 6: DAD1 F, Sig=280,16 Ref=off

Signal has been modified after loading from rawdata file!

Data File C:\CHEM32\1\DATA\LAXMAN\LD-V-77-RUN0001.D  
Sample Name: LD-V-77-1A-run1

| Peak # | RetTime [min] | Type | Width [min] | Area [mAU*s] | Height [mAU] | Area %  |
|--------|---------------|------|-------------|--------------|--------------|---------|
| 1      | 1.346         | BV   | 0.1634      | 13.47963     | 1.03886      | 0.8410  |
| 2      | 1.918         | BB   | 0.0398      | 16.67188     | 6.99573      | 1.0401  |
| 3      | 9.972         | BV   | 0.1246      | 10.85515     | 1.31168      | 0.6772  |
| 4      | 11.953        | BB   | 0.1431      | 16.43839     | 1.61048      | 1.0256  |
| 5      | 13.016        | BV   | 0.0890      | 1503.59937   | 254.13380    | 93.8061 |
| 6      | 14.015        | VB   | 0.1280      | 10.35211     | 1.13919      | 0.6458  |
| 7      | 16.738        | BB   | 0.1006      | 31.48283     | 4.67115      | 1.9641  |

Totals : 1602.87935 270.90089

Signal 7: DAD1 G, Sig=300,16 Ref=off  
Signal has been modified after loading from rawdata file!

| Peak # | RetTime [min] | Type | Width [min] | Area [mAU*s] | Height [mAU] | Area %  |
|--------|---------------|------|-------------|--------------|--------------|---------|
| 1      | 1.918         | BB   | 0.0399      | 13.10246     | 5.47127      | 0.9396  |
| 2      | 11.955        | BB   | 0.0952      | 8.87040      | 1.49495      | 0.6361  |
| 3      | 13.017        | BV   | 0.0933      | 1331.21448   | 211.96465    | 95.4686 |
| 4      | 14.013        | VB   | 0.1117      | 12.31849     | 1.60284      | 0.8834  |
| 5      | 16.737        | BB   | 0.1013      | 28.89387     | 4.14858      | 2.0721  |

Totals : 1394.39970 224.68228

Signal 8: DAD1 H, Sig=320,16 Ref=off  
Signal has been modified after loading from rawdata file!

| Peak # | RetTime [min] | Type | Width [min] | Area [mAU*s] | Height [mAU] | Area %  |
|--------|---------------|------|-------------|--------------|--------------|---------|
| 1      | 1.919         | BB   | 0.0399      | 11.75484     | 4.92294      | 1.0894  |
| 2      | 11.962        | BB   | 0.1461      | 25.13461     | 2.52625      | 2.3294  |
| 3      | 13.017        | BV   | 0.0946      | 1012.13507   | 158.33987    | 93.8010 |
| 4      | 14.012        | BB   | 0.0878      | 7.24201      | 1.28391      | 0.6712  |
| 5      | 16.736        | BB   | 0.1061      | 22.75686     | 3.08307      | 2.1090  |

Totals : 1079.02340 170.15604

=====  
\*\*\* End of Report \*\*\*

<sup>1</sup>H NMR (CD<sub>3</sub>OD, 600 MHz) Compound **10**

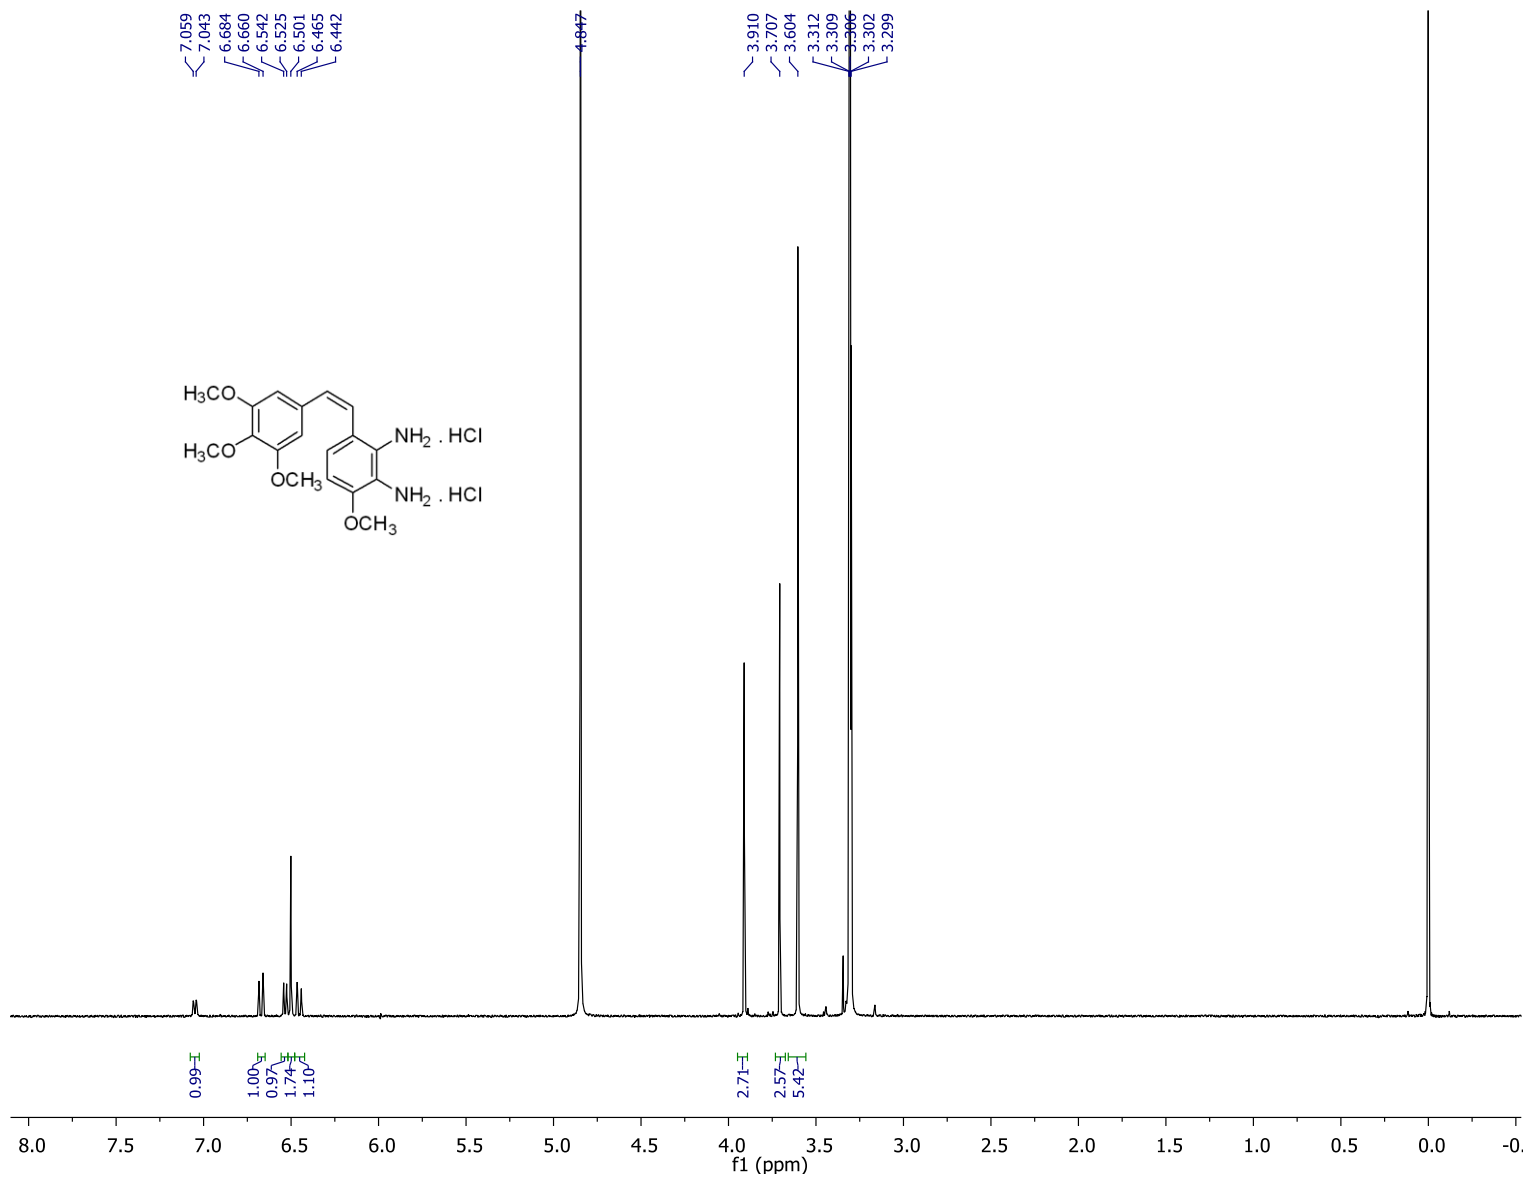

<sup>13</sup>C NMR (CD<sub>3</sub>OD, 150 MHz) Compound **10**

152.688  
152.254

137.141  
136.972

132.582  
132.223

129.233  
123.993

118.987

107.374  
105.961

101.423

59.655  
55.422  
54.875

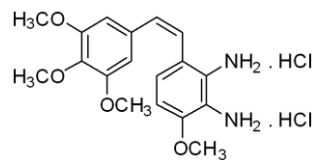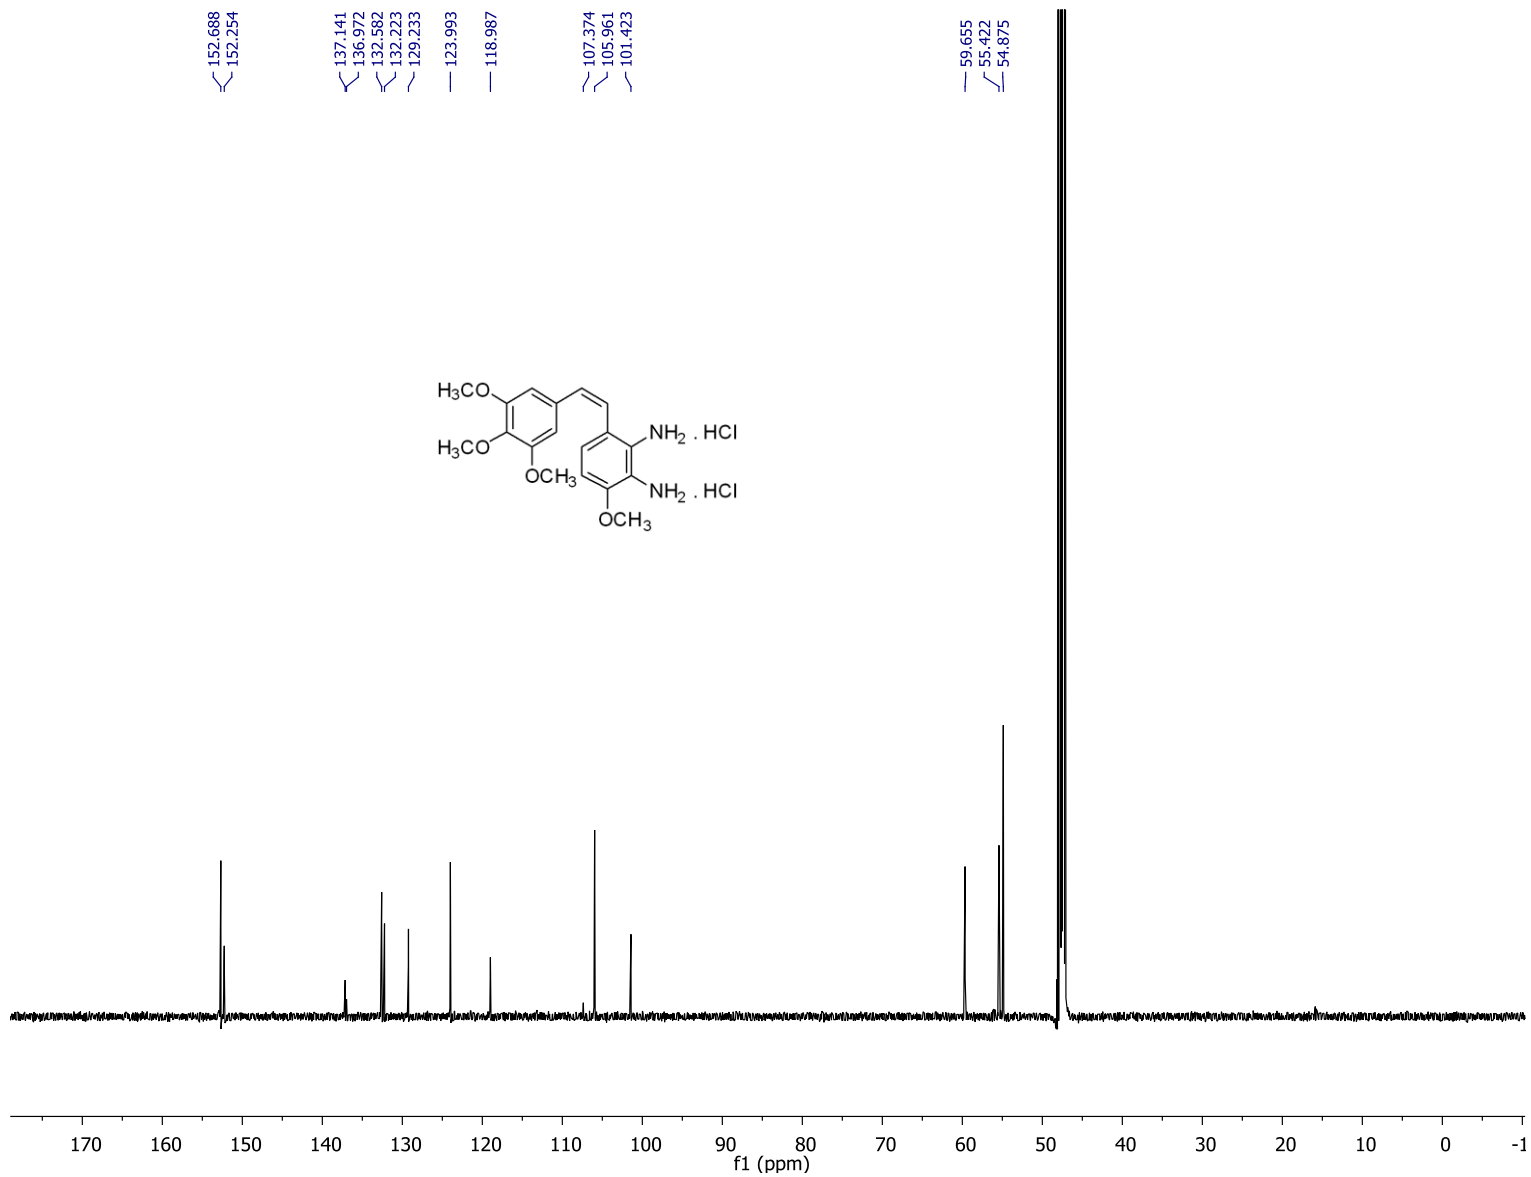

### HRMS Compound 10

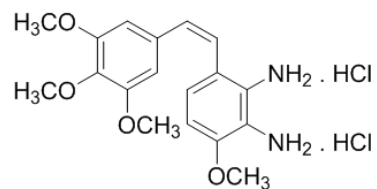

**Chemical Formula: C<sub>18</sub>H<sub>24</sub>Cl<sub>2</sub>N<sub>2</sub>O<sub>4</sub>**  
**Exact Mass: 402.1113**

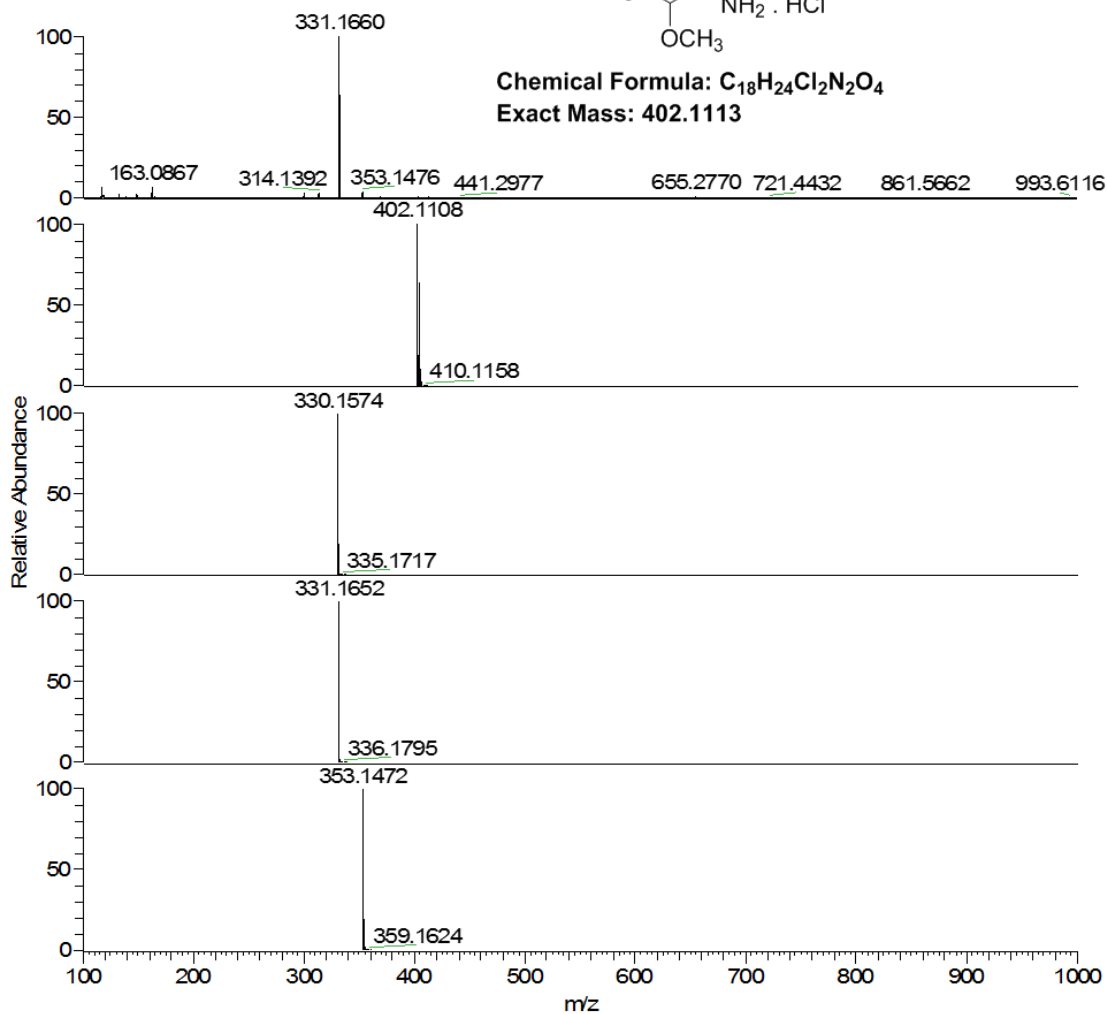

NL:  
 3.43E6  
 LD-II-33\_Orbi\_+ES#1  
 RT: 0.00 AV: 1 T: FTMS  
 + p ESI Full ms  
 [100.00-1000.00]

NL:  
 4.64E5  
 C<sub>18</sub> H<sub>24</sub> Cl<sub>2</sub> N<sub>2</sub> O<sub>4</sub>:  
 C<sub>18</sub> H<sub>24</sub> Cl<sub>2</sub> N<sub>2</sub> O<sub>4</sub>:  
 pa Chrg 1

NL:  
 8.08E5  
 C<sub>18</sub> H<sub>22</sub> N<sub>2</sub> O<sub>4</sub>:  
 C<sub>18</sub> H<sub>22</sub> N<sub>2</sub> O<sub>4</sub>:  
 pa Chrg 1

NL:  
 8.08E5  
 C<sub>18</sub> H<sub>22</sub> N<sub>2</sub> O<sub>4</sub> +H:  
 C<sub>18</sub> H<sub>23</sub> N<sub>2</sub> O<sub>4</sub>:  
 pa Chrg 1

NL:  
 8.08E5  
 C<sub>18</sub> H<sub>22</sub> N<sub>2</sub> O<sub>4</sub> +Na:  
 C<sub>18</sub> H<sub>22</sub> N<sub>2</sub> O<sub>4</sub> Na:  
 pa Chrg 1

# HPLC for Compound 10

Data File C:\CHEM32\1\DATA\LAXMAN\LD-II-32000001.D  
Sample Name: LD-II-32-run1

```
=====
Acq. Operator   : Laxman
Acq. Instrument : Instrument 1           Location : -
Injection Date  : 6/28/2015 4:33:05 PM
Acq. Method     : C:\CHEM32\1\METHODS\MASTERMETHOD2.M
Last changed    : 6/28/2015 4:06:36 PM by Eric Lin
Analysis Method : C:\CHEM32\1\DATA\LAXMAN\LD-II-32000001.D\DA.M (MASTERMETHOD2.M)
Last changed    : 6/28/2015 5:21:03 PM by Laxman
Sample Info     : Method-Mastermethod2
```

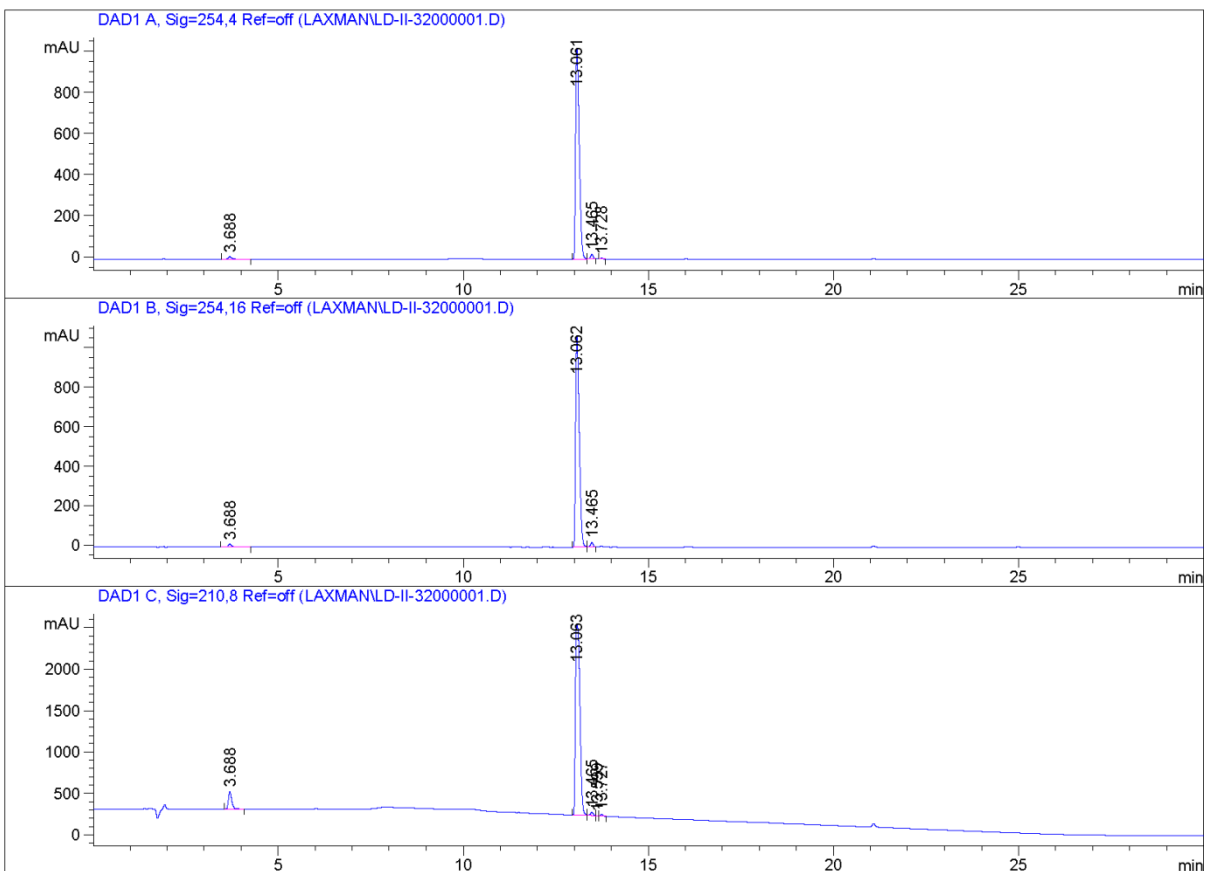

Data File C:\CHEM32\1\DATA\LAXMAN\LD-II-32000001.D  
Sample Name: LD-II-32-run1

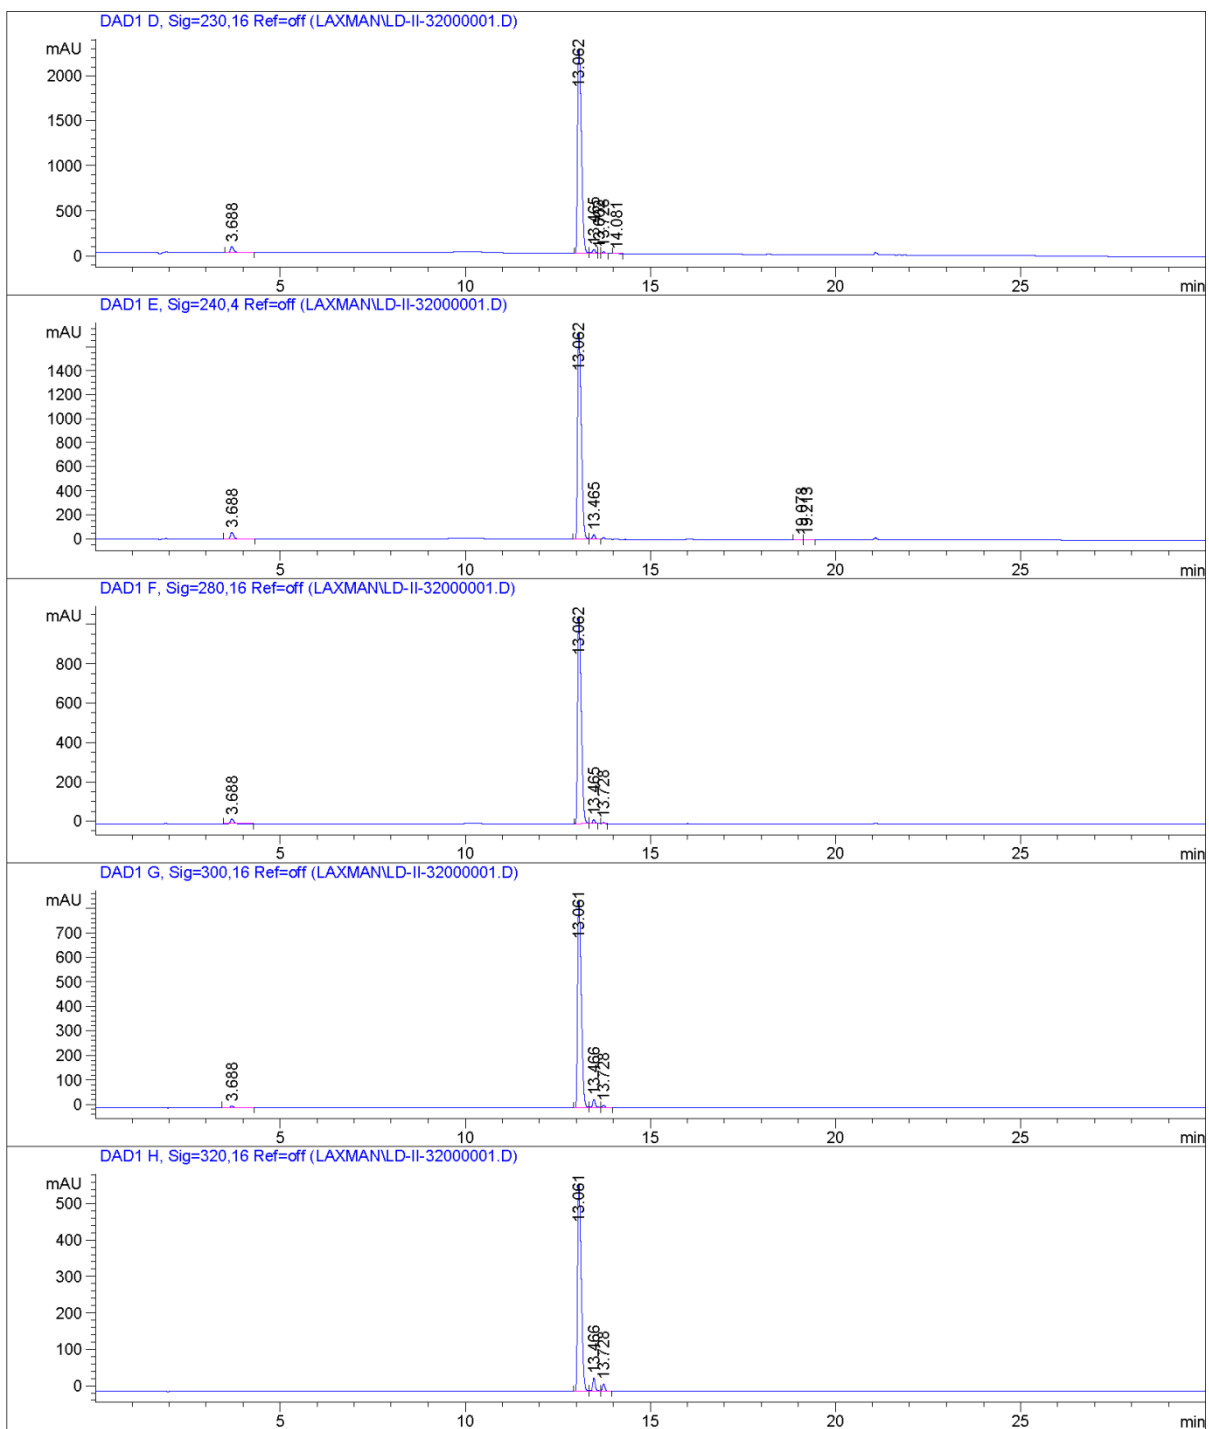

=====  
Area Percent Report  
=====

Sorted By : Signal  
Multiplier : 1.0000  
Dilution : 1.0000  
Use Multiplier & Dilution Factor with ISTDs

Signal 1: DAD1 A, Sig=254,4 Ref=off

| Peak # | RetTime [min] | Type | Width [min] | Area [mAU*s] | Height [mAU] | Area %  |
|--------|---------------|------|-------------|--------------|--------------|---------|
| 1      | 3.688         | BB   | 0.0941      | 70.04690     | 11.33046     | 0.9650  |
| 2      | 13.061        | BV   | 0.1080      | 7049.17139   | 1027.60767   | 97.1129 |
| 3      | 13.465        | VV   | 0.0763      | 120.15994    | 24.05628     | 1.6554  |
| 4      | 13.728        | BB   | 0.0639      | 19.36081     | 4.71832      | 0.2667  |

Totals : 7258.73903 1067.71272

Signal 2: DAD1 B, Sig=254,16 Ref=off

| Peak # | RetTime [min] | Type | Width [min] | Area [mAU*s] | Height [mAU] | Area %  |
|--------|---------------|------|-------------|--------------|--------------|---------|
| 1      | 3.688         | BB   | 0.0939      | 90.60506     | 14.70064     | 1.1994  |
| 2      | 13.062        | BV   | 0.1080      | 7342.37061   | 1070.50842   | 97.1965 |
| 3      | 13.465        | VV   | 0.0764      | 121.17745    | 24.21496     | 1.6041  |

Totals : 7554.15312 1109.42402

Signal 3: DAD1 C, Sig=210,8 Ref=off

| Peak # | RetTime [min] | Type | Width [min] | Area [mAU*s] | Height [mAU] | Area %  |
|--------|---------------|------|-------------|--------------|--------------|---------|
| 1      | 3.688         | BB   | 0.0958      | 1287.63904   | 209.26445    | 6.1710  |
| 2      | 13.063        | BV   | 0.1355      | 1.92646e4    | 2304.68799   | 92.3255 |
| 3      | 13.465        | VV   | 0.0819      | 230.33527    | 42.03444     | 1.1039  |
| 4      | 13.599        | VB   | 0.0544      | 11.39503     | 3.29091      | 0.0546  |
| 5      | 13.727        | BB   | 0.0648      | 71.98167     | 17.20097     | 0.3450  |

Totals : 2.08659e4 2576.47876



Data File C:\CHEM32\1\DATA\LAXMAN\LD-II-32000001.D  
Sample Name: LD-II-32-run1

Signal 4: DAD1 D, Sig=230,16 Ref=off

| Peak # | RetTime [min] | Type | Width [min] | Area [mAU*s] | Height [mAU] | Area %  |
|--------|---------------|------|-------------|--------------|--------------|---------|
| 1      | 3.688         | BB   | 0.0936      | 411.70078    | 67.10372     | 2.3965  |
| 2      | 13.062        | BV   | 0.1164      | 1.64493e4    | 2272.70361   | 95.7515 |
| 3      | 13.465        | VV   | 0.0778      | 231.34738    | 45.13335     | 1.3467  |
| 4      | 13.602        | VB   | 0.0543      | 8.60591      | 2.49010      | 0.0501  |
| 5      | 13.728        | BB   | 0.0650      | 70.94254     | 16.90570     | 0.4130  |
| 6      | 14.081        | BV   | 0.1019      | 7.25227      | 1.00877      | 0.0422  |

Totals : 1.71791e4 2405.34525

Signal 5: DAD1 E, Sig=240,4 Ref=off

| Peak # | RetTime [min] | Type | Width [min] | Area [mAU*s] | Height [mAU] | Area %  |
|--------|---------------|------|-------------|--------------|--------------|---------|
| 1      | 3.688         | BB   | 0.0935      | 340.03543    | 55.47417     | 2.7247  |
| 2      | 13.062        | BV   | 0.1086      | 1.18929e4    | 1721.22375   | 95.2988 |
| 3      | 13.465        | VV   | 0.0842      | 224.57724    | 39.56317     | 1.7996  |
| 4      | 19.078        | BV   | 0.1209      | 10.11429     | 1.24328      | 0.0810  |
| 5      | 19.213        | VB   | 0.1184      | 11.95831     | 1.41727      | 0.0958  |

Totals : 1.24796e4 1818.92165

Signal 6: DAD1 F, Sig=280,16 Ref=off

| Peak # | RetTime [min] | Type | Width [min] | Area [mAU*s] | Height [mAU] | Area %  |
|--------|---------------|------|-------------|--------------|--------------|---------|
| 1      | 3.688         | BB   | 0.0936      | 149.57484    | 24.38544     | 1.9959  |
| 2      | 13.062        | BV   | 0.1079      | 7213.50439   | 1053.68127   | 96.2542 |
| 3      | 13.465        | VV   | 0.0766      | 108.89276    | 21.67045     | 1.4530  |
| 4      | 13.728        | BB   | 0.0643      | 22.24905     | 5.37009      | 0.2969  |

Totals : 7494.22105 1105.10725

Signal 7: DAD1 G, Sig=300,16 Ref=off

| Peak # | RetTime [min] | Type | Width [min] | Area [mAU*s] | Height [mAU] | Area %  |
|--------|---------------|------|-------------|--------------|--------------|---------|
| 1      | 3.688         | BB   | 0.0965      | 37.61830     | 6.05143      | 0.6159  |
| 2      | 13.061        | BV   | 0.1083      | 5836.52344   | 848.33795    | 95.5620 |

Data File C:\CHEM32\1\DATA\LAXMAN\LD-II-32000001.D

Sample Name: LD-II-32-run1

| Peak # | RetTime [min] | Type | Width [min] | Area [mAU*s] | Height [mAU] | Area % |
|--------|---------------|------|-------------|--------------|--------------|--------|
| 3      | 13.466        | VV   | 0.0789      | 182.86238    | 35.00428     | 2.9940 |
| 4      | 13.728        | VB   | 0.0714      | 50.57355     | 10.64560     | 0.8280 |

Totals : 6107.57767 900.03926

Signal 8: DAD1 H, Sig=320,16 Ref=off

| Peak # | RetTime [min] | Type | Width [min] | Area [mAU*s] | Height [mAU] | Area %  |
|--------|---------------|------|-------------|--------------|--------------|---------|
| 1      | 13.061        | BV   | 0.1086      | 3937.61230   | 569.77728    | 93.4290 |
| 2      | 13.466        | VV   | 0.0762      | 185.44067    | 37.14345     | 4.4000  |
| 3      | 13.728        | VB   | 0.0697      | 91.49677     | 19.89258     | 2.1710  |

Totals : 4214.54975 626.81331

=====  
\*\*\* End of Report \*\*\*

<sup>1</sup>H NMR (CDCl<sub>3</sub>, 500 MHz) Compound **11**

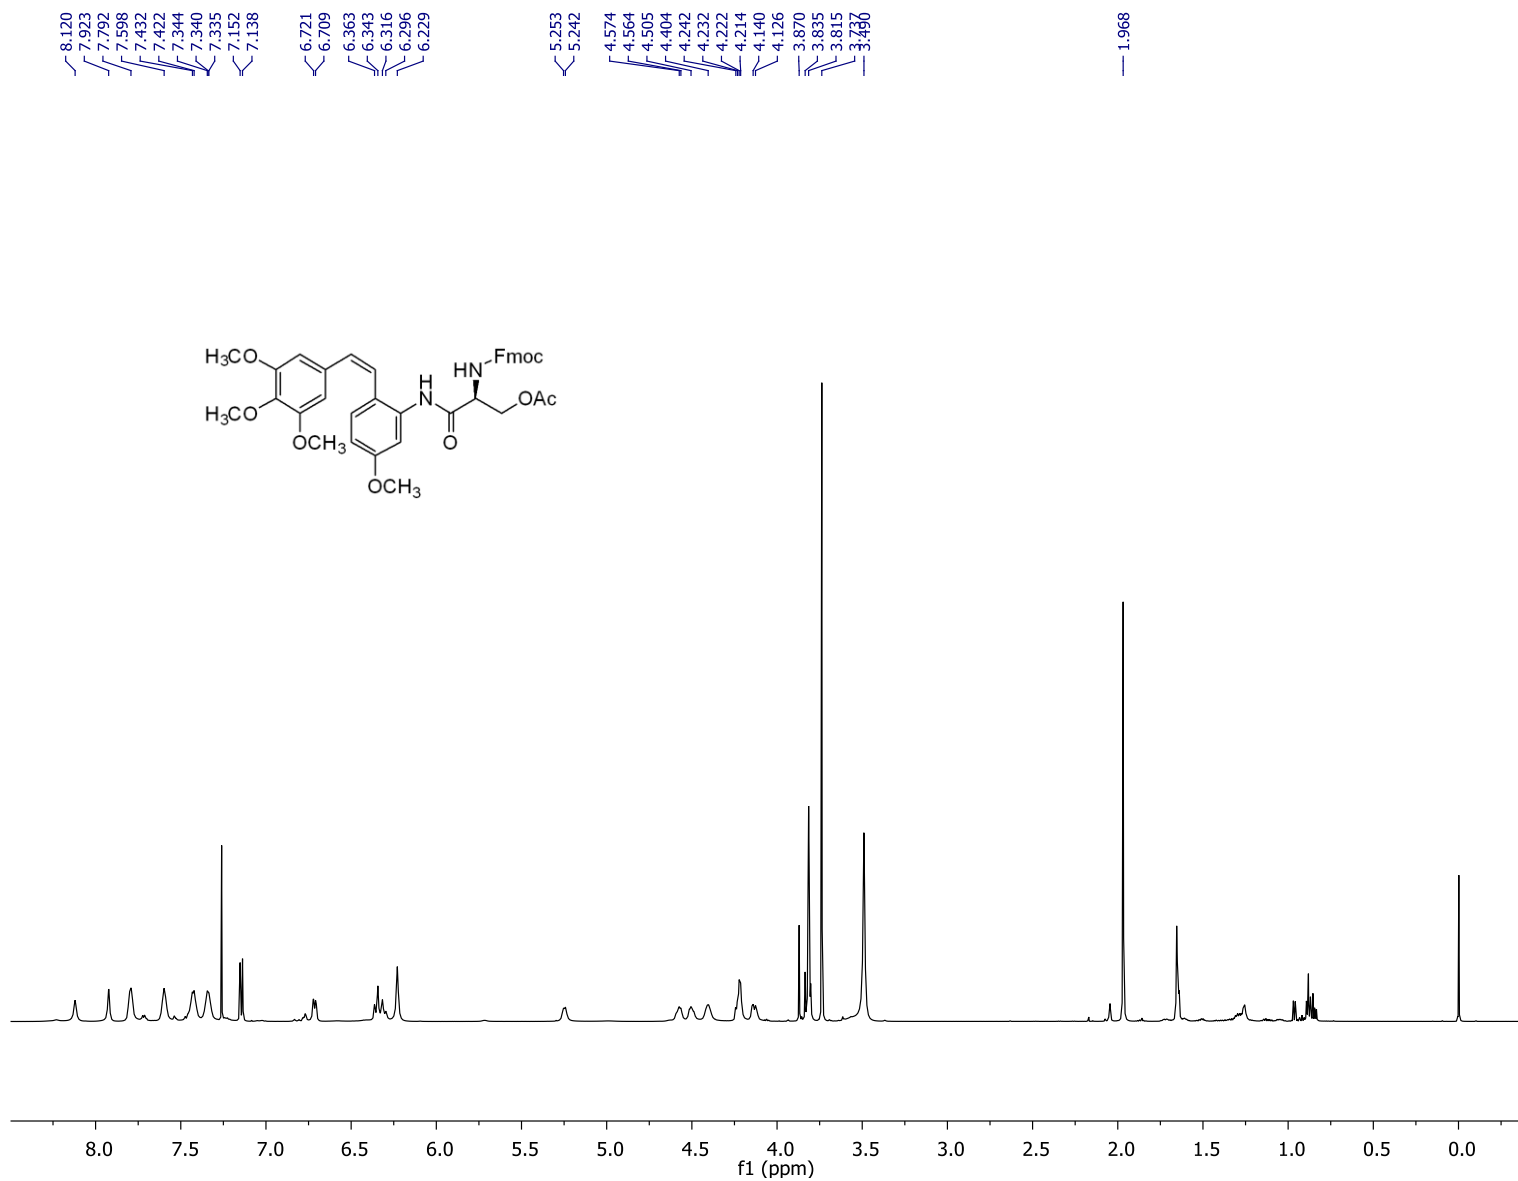

<sup>13</sup>C NMR (CDCl<sub>3</sub>, 150 MHz) Compound **11**

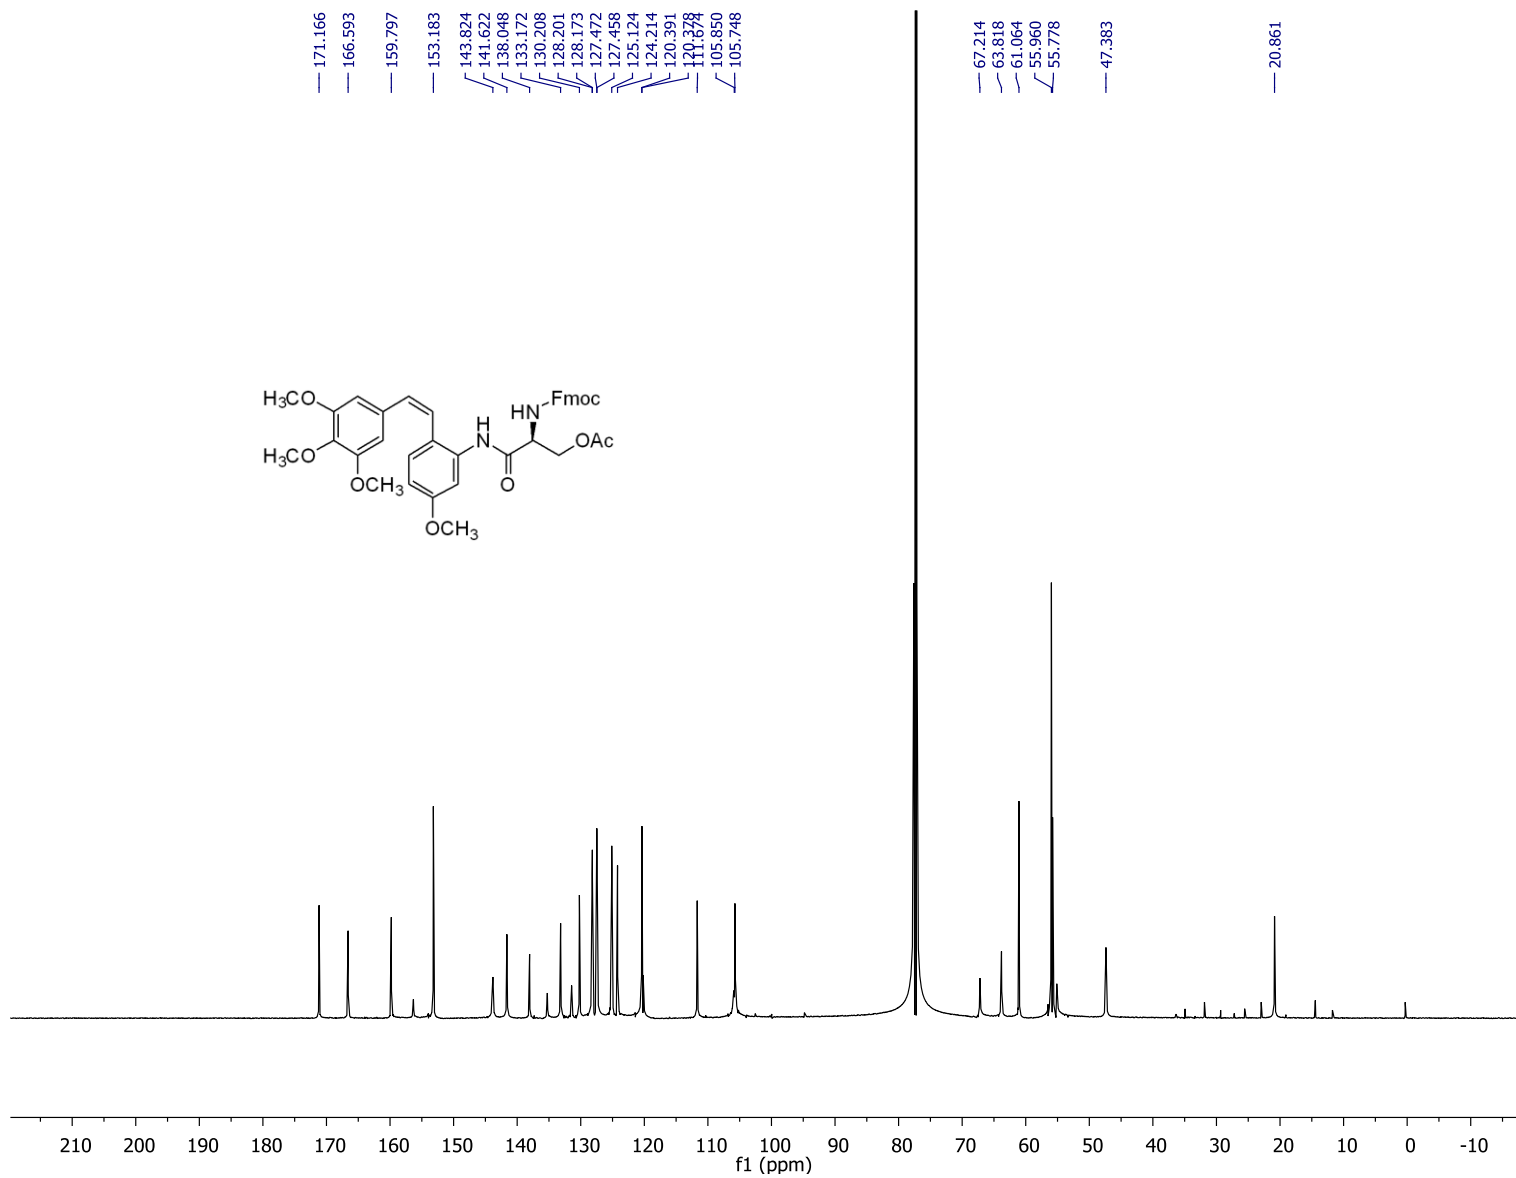

<sup>1</sup>H NMR (CDCl<sub>3</sub>, 500 MHz) Compound 12

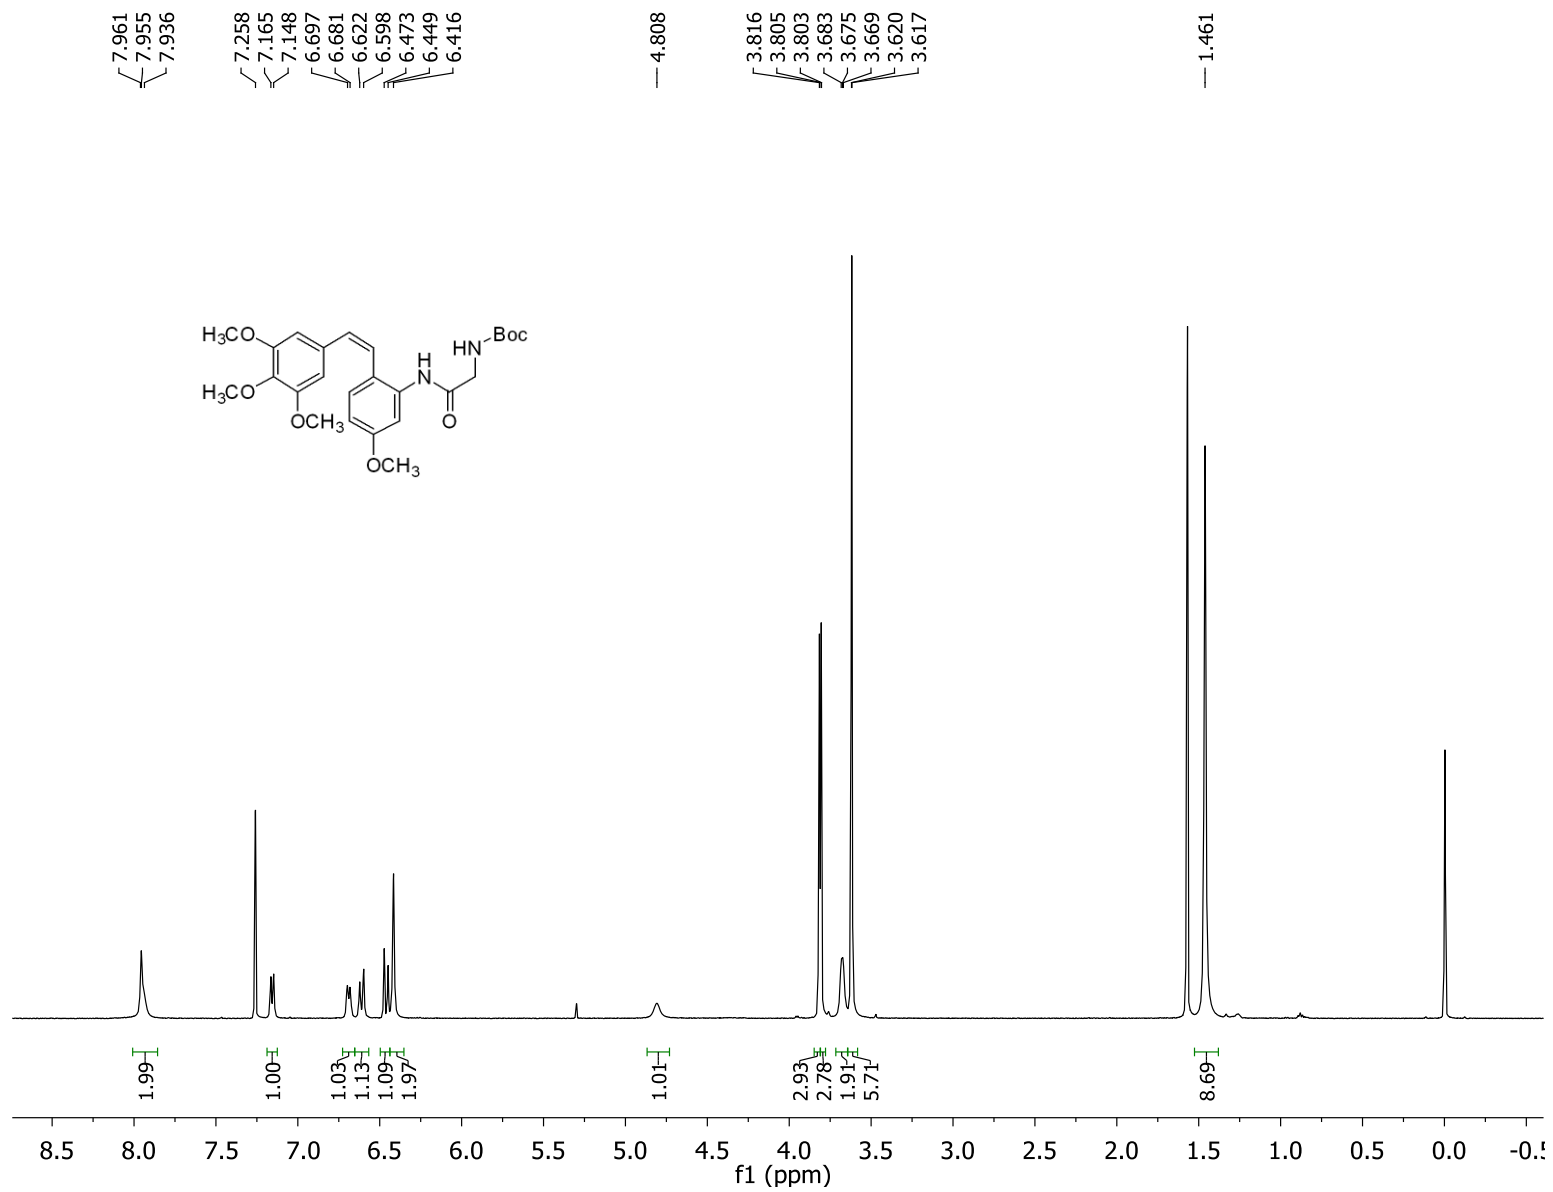

S53

<sup>13</sup>C NMR (CDCl<sub>3</sub>, 125 MHz) Compound **12**

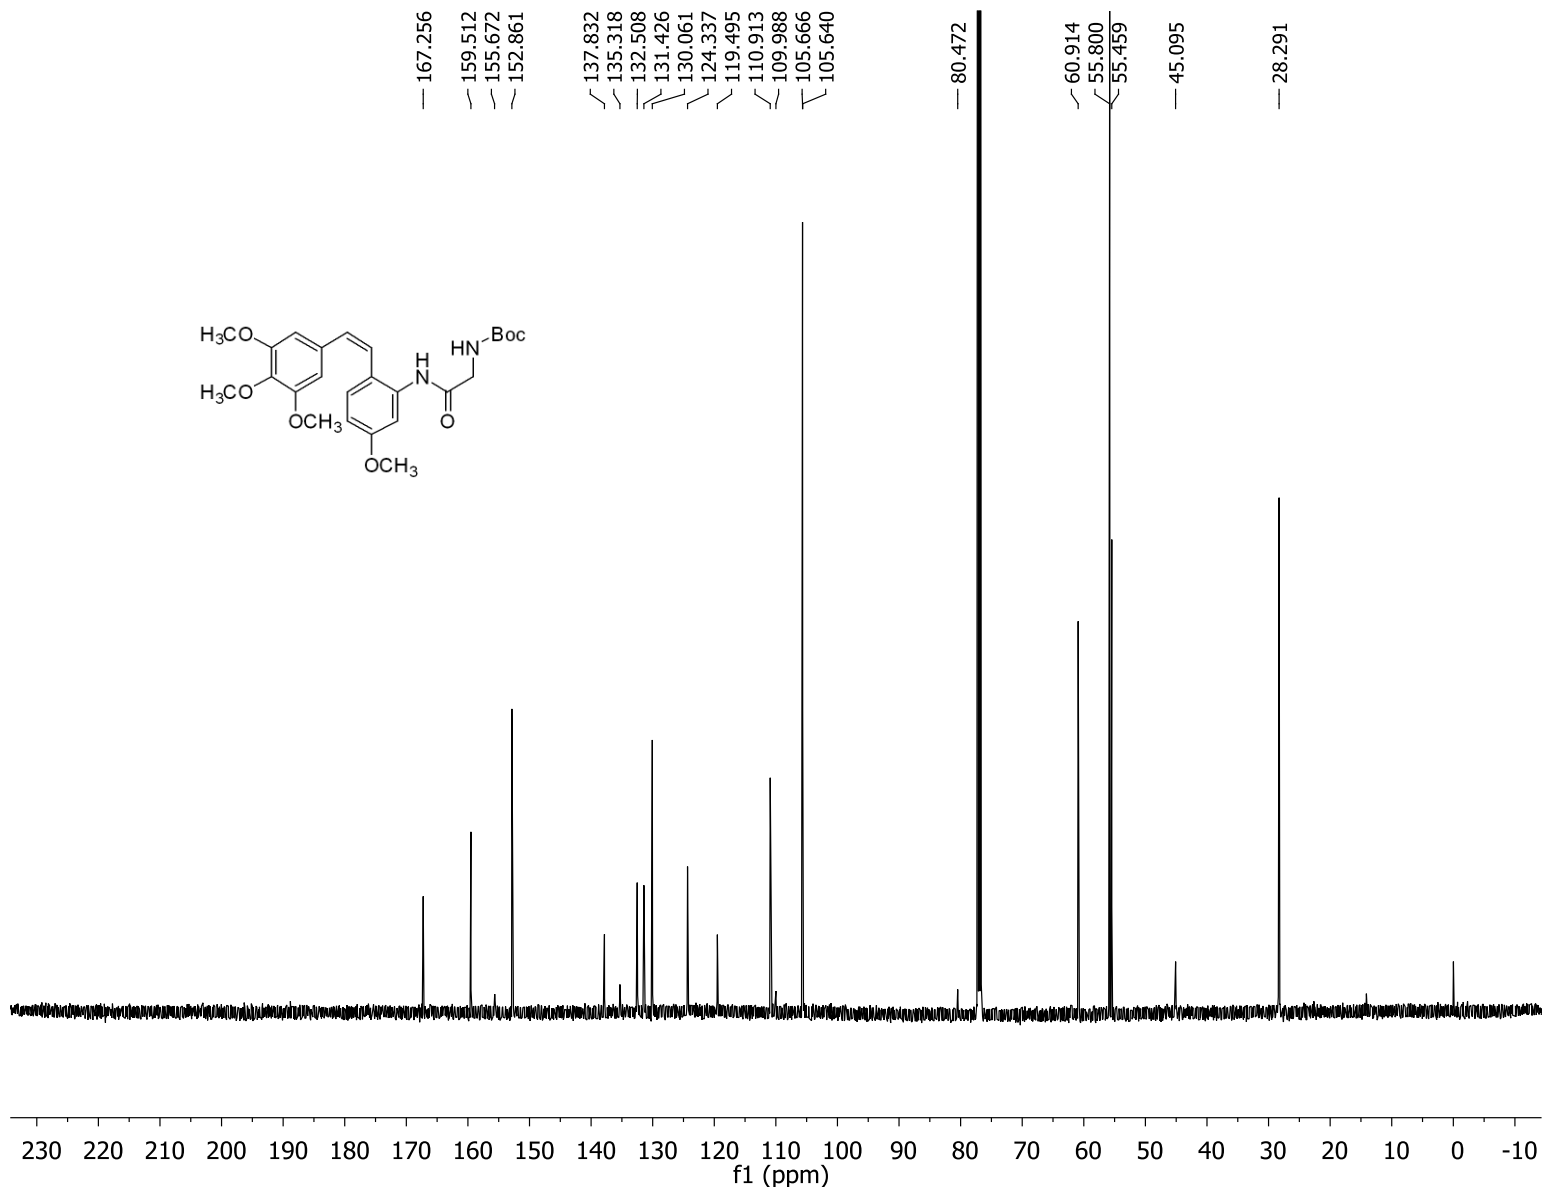

S54

<sup>1</sup>H NMR (CDCl<sub>3</sub>, 500 MHz) Compound 13

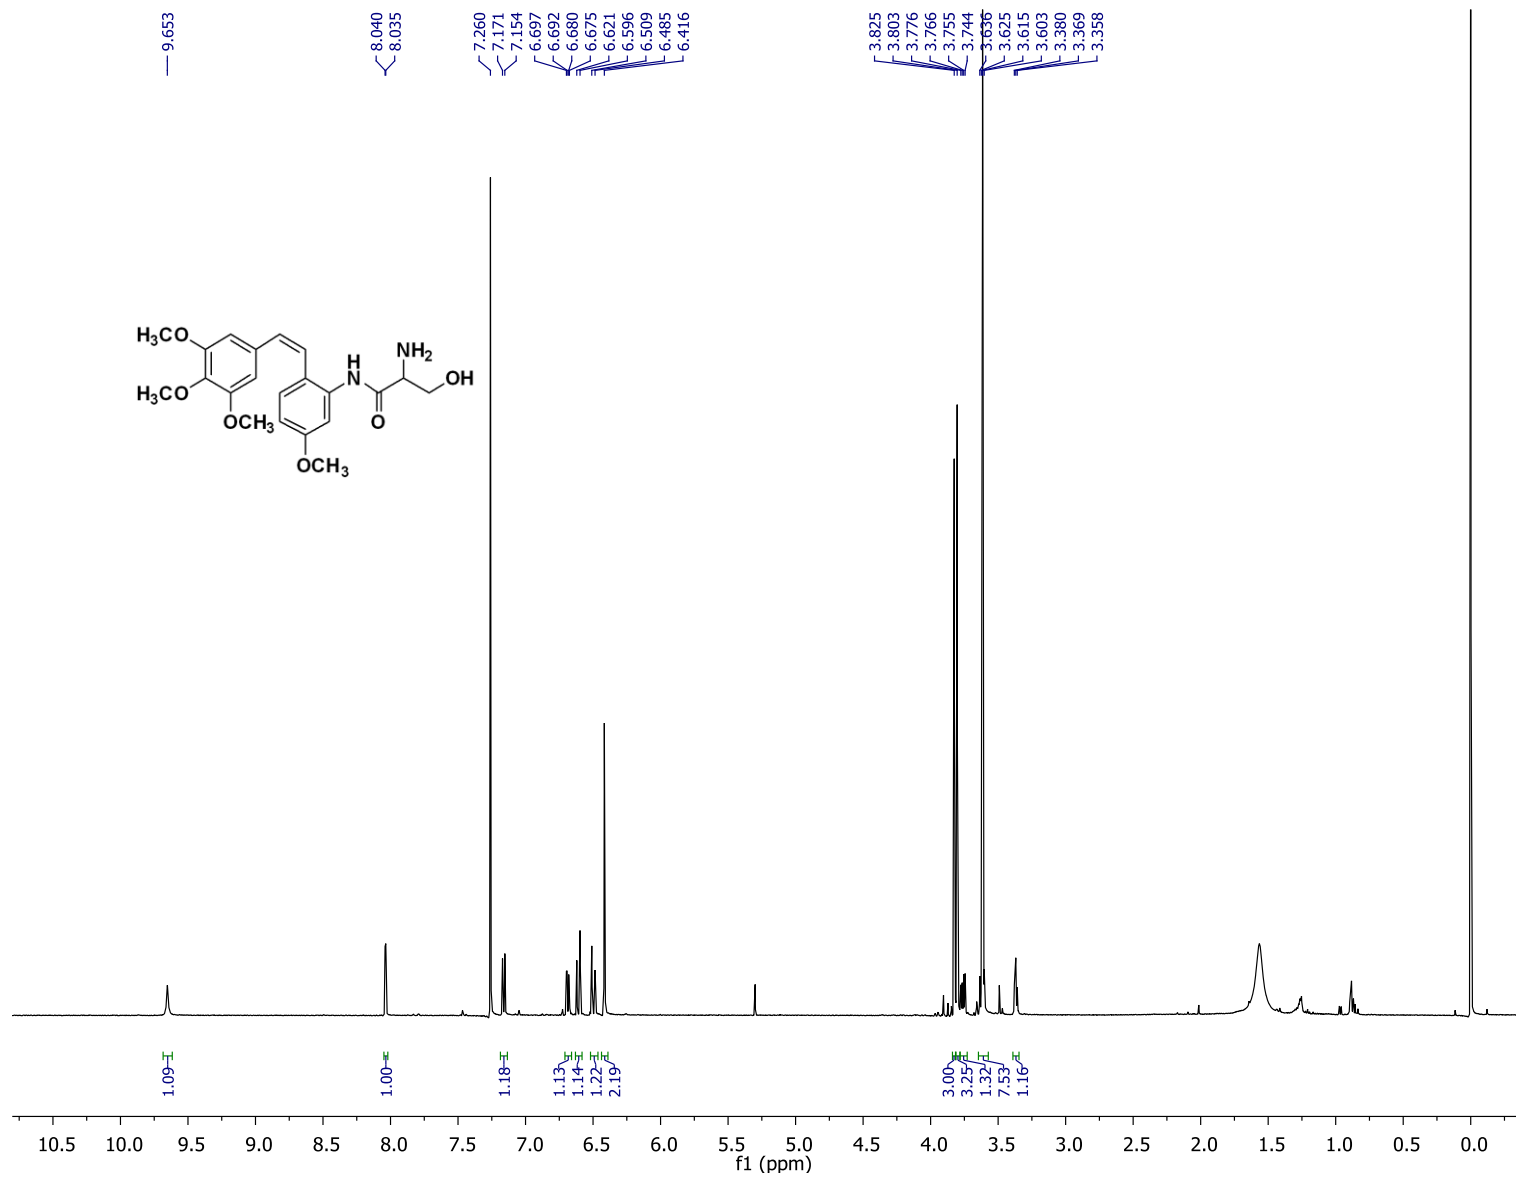

<sup>13</sup>C NMR (CDCl<sub>3</sub>, 90 MHz) Compound **13**

— 171.651  
— 159.524  
— 152.838  
/ 137.891  
/ 135.835  
/ 132.555  
/ 131.771  
/ 130.057  
/ 124.325  
/ 120.061  
/ 110.795  
/ 106.121  
/ 105.597  
  
/ 77.420 CDCl<sub>3</sub>  
/ 77.066 CDCl<sub>3</sub>  
/ 76.713 CDCl<sub>3</sub>  
/ 64.805  
/ 60.840  
/ 56.765  
/ 55.902  
/ 55.443

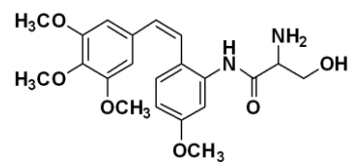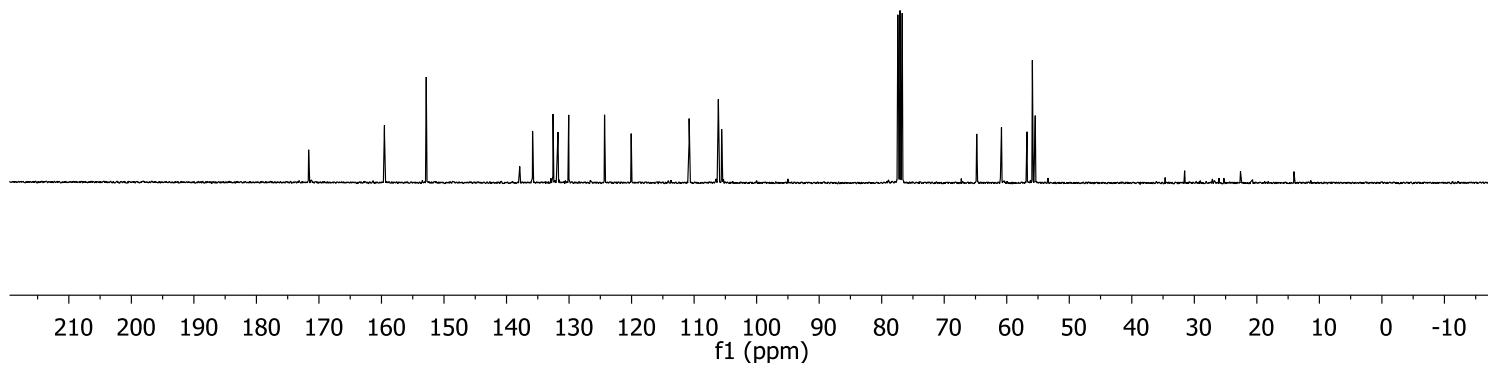



### HRMS Compound 13

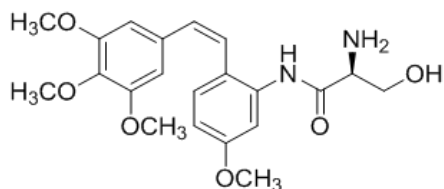

Chemical Formula:  $C_{21}H_{26}N_2O_6$   
Exact Mass: 402.1791

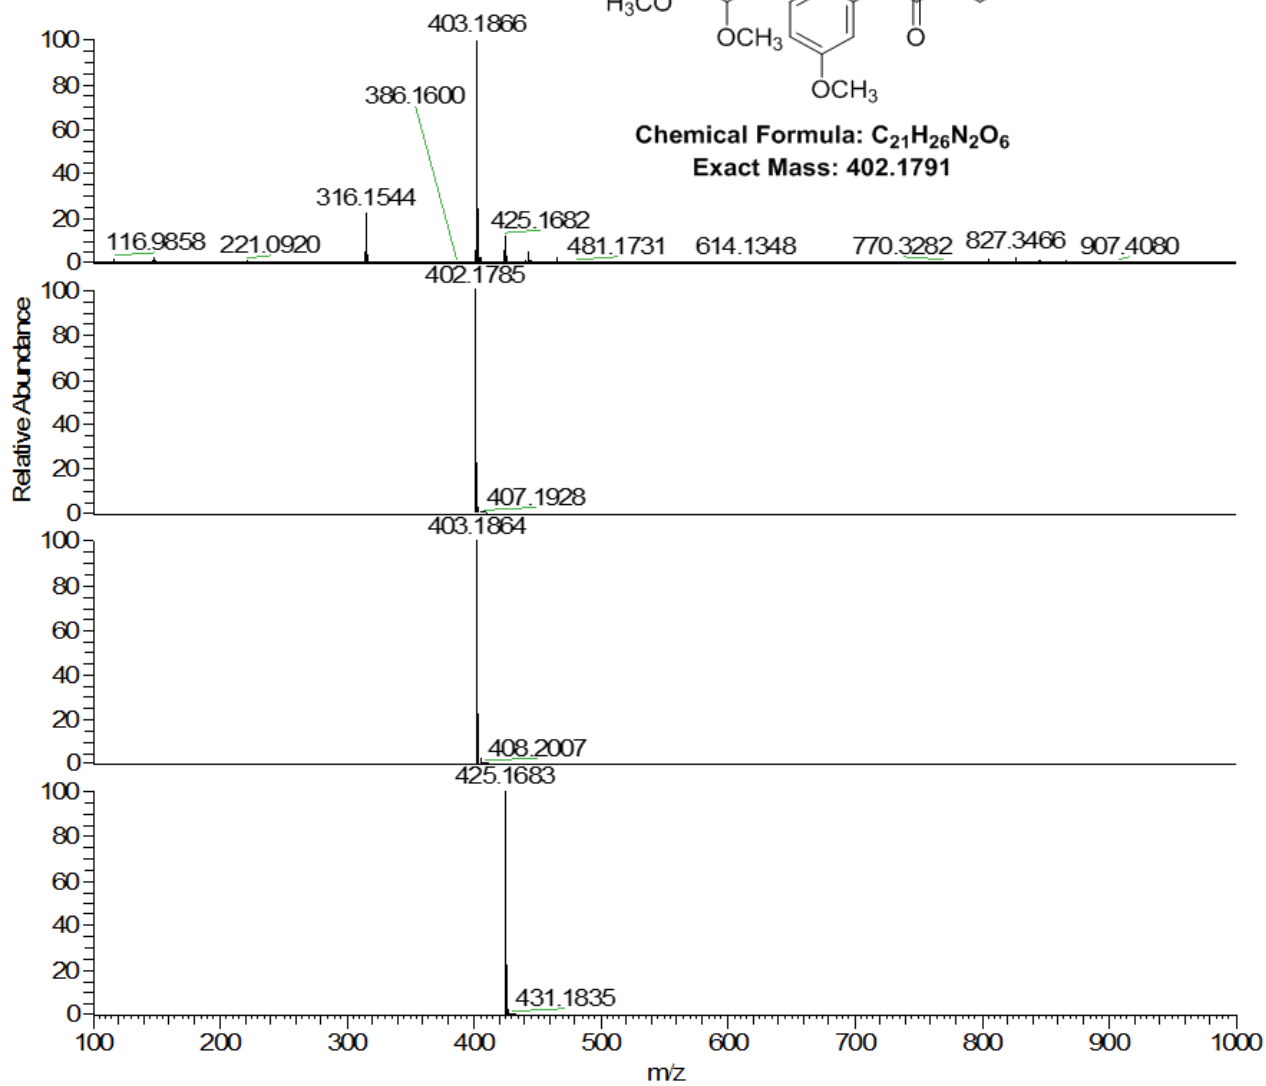

NL:  
1.05E8  
LD-V-155\_Orbi\_+  
ESI#1 RT: 0.01 AV:  
1 T: FTMS +p ESI  
Full ms  
[100.00-1000.00]

NL:  
7.78E5  
 $C_{21}H_{26}N_2O_6$ :  
 $C_{21}H_{26}N_2O_6$   
pa Chrg 1

NL:  
7.78E5  
 $C_{21}H_{26}N_2O_6 +H$ :  
 $C_{21}H_{27}N_2O_6$   
pa Chrg 1

NL:  
7.78E5  
 $C_{21}H_{26}N_2O_6 +Na$ :  
 $C_{21}H_{26}N_2O_6 Na_1$   
pa Chrg 1

# HPLC for Compound 13

Data File C:\CHEM32\1\DATA\LAXMAN\LD-V-155-1A0001.D

Sample Name: LD-V-155-1A-run1

=====

Acq. Operator : Laxman  
Acq. Instrument : Instrument 1 Location : -  
Injection Date : 7/31/2014 1:28:27 PM  
Acq. Method : C:\CHEM32\1\METHODS\MASTERMETHOD2.M  
Last changed : 7/31/2014 1:12:57 PM by Laxman  
Analysis Method : C:\CHEM32\1\DATA\LAXMAN\LD-V-155-1A0001.D\DA.M (MASTERMETHOD2.M)  
Last changed : 7/31/2014 2:17:20 PM by Laxman  
Sample Info : Method- Mastermethod2  
0-5 min 10:90 ACN: 0.1% TFA in Water  
5-25 min 10:90 to 100:0 ACN: 0.1% TFA in Water  
25-30 min 100:0 ACN: 0.1% TFA in Water

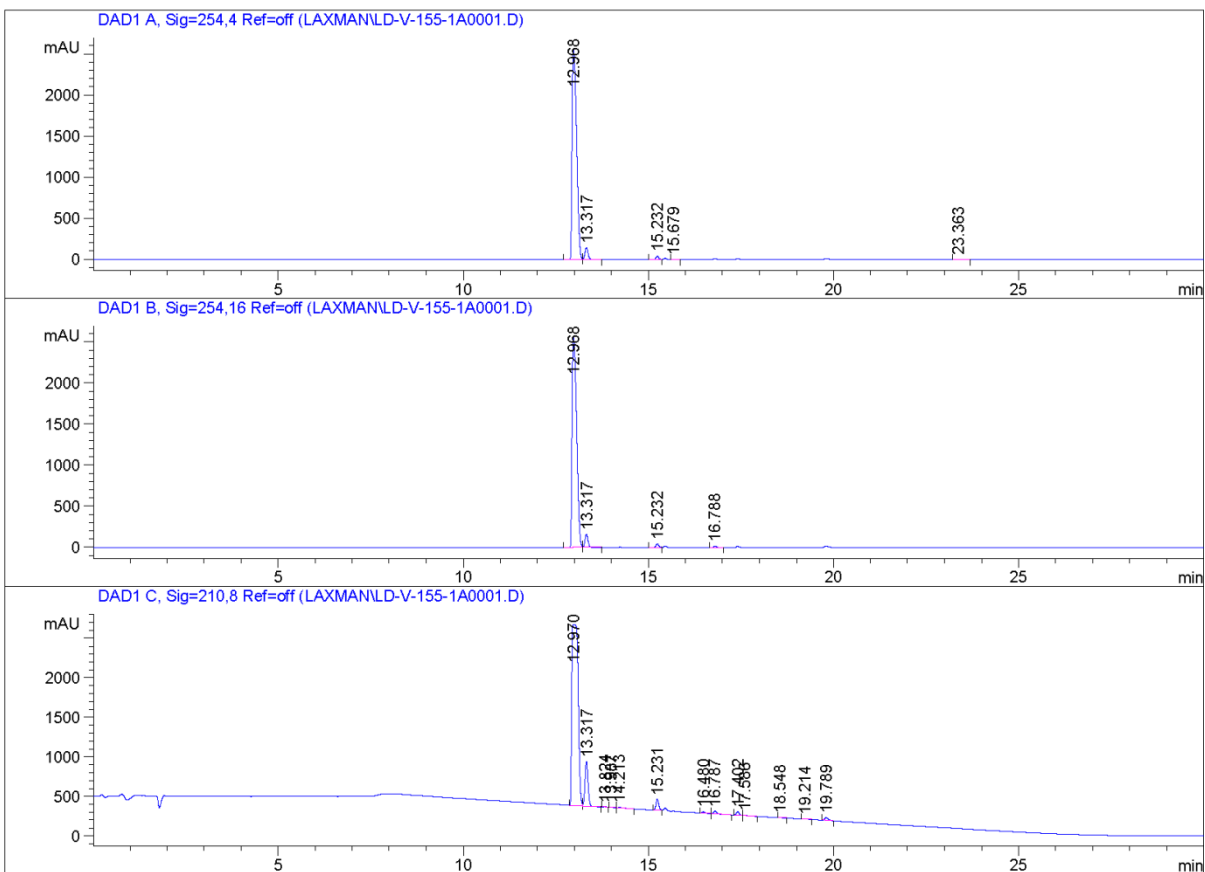

Data File C:\CHEM32\1\DATA\LAXMAN\LD-V-155-1A0001.D  
Sample Name: LD-V-155-1A-run1

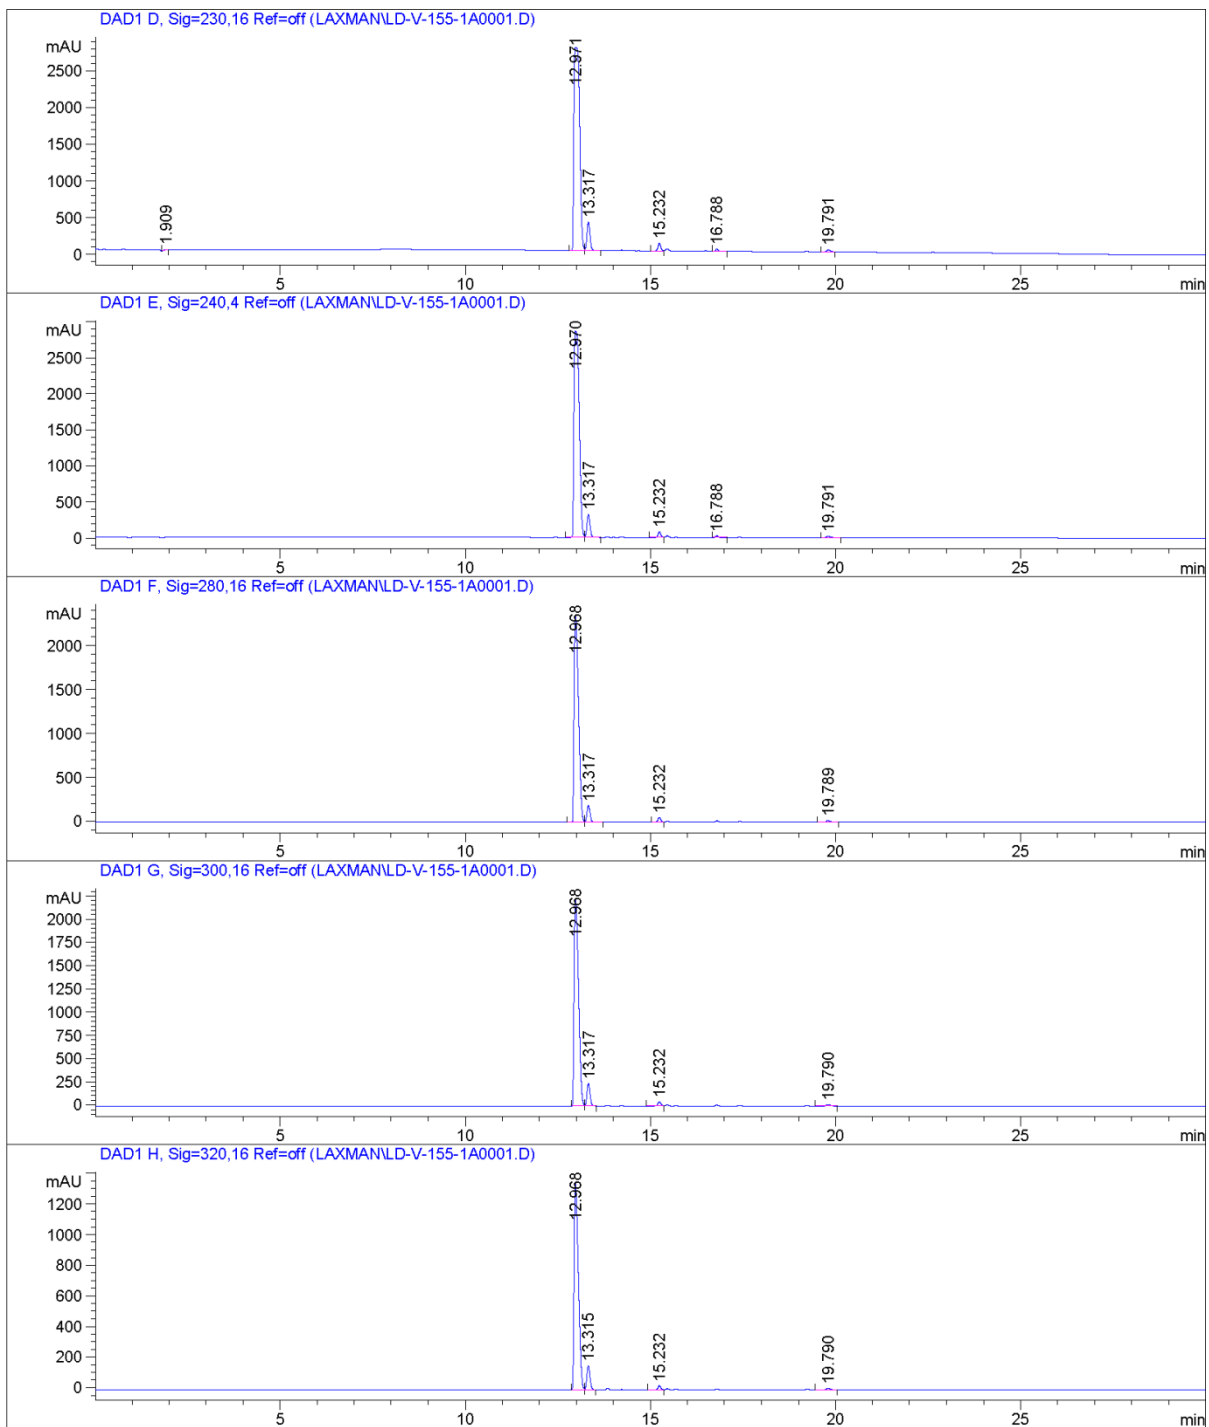

=====  
Area Percent Report  
=====

Sorted By : Signal  
Multiplier : 1.0000  
Dilution : 1.0000  
Use Multiplier & Dilution Factor with ISTDs

Signal 1: DAD1 A, Sig=254,4 Ref=off

| Peak # | RetTime [min] | Type | Width [min] | Area [mAU*s] | Height [mAU] | Area %  |
|--------|---------------|------|-------------|--------------|--------------|---------|
| 1      | 12.968        | BV   | 0.1362      | 2.16384e4    | 2571.50366   | 95.2518 |
| 2      | 13.317        | VB   | 0.0888      | 820.29114    | 143.31441    | 3.6109  |
| 3      | 15.232        | BV   | 0.0812      | 234.08575    | 43.19005     | 1.0304  |
| 4      | 15.679        | VB   | 0.0841      | 9.86208      | 1.79634      | 0.0434  |
| 5      | 23.363        | VB   | 0.1591      | 14.41530     | 1.20862      | 0.0635  |

Totals : 2.27171e4 2761.01308

Signal 2: DAD1 B, Sig=254,16 Ref=off

| Peak # | RetTime [min] | Type | Width [min] | Area [mAU*s] | Height [mAU] | Area %  |
|--------|---------------|------|-------------|--------------|--------------|---------|
| 1      | 12.968        | BV   | 0.1368      | 2.17823e4    | 2571.05396   | 94.5653 |
| 2      | 13.317        | VB   | 0.0885      | 910.27527    | 159.73578    | 3.9519  |
| 3      | 15.232        | BV   | 0.0812      | 252.29407    | 46.55761     | 1.0953  |
| 4      | 16.788        | BB   | 0.0815      | 89.26048     | 16.92814     | 0.3875  |

Totals : 2.30341e4 2794.27549

Signal 3: DAD1 C, Sig=210,8 Ref=off

| Peak # | RetTime [min] | Type | Width [min] | Area [mAU*s] | Height [mAU] | Area %  |
|--------|---------------|------|-------------|--------------|--------------|---------|
| 1      | 12.970        | VV   | 0.1930      | 2.69550e4    | 2294.62939   | 84.3049 |
| 2      | 13.317        | VB   | 0.0884      | 3234.33423   | 568.48431    | 10.1158 |
| 3      | 13.824        | BB   | 0.0694      | 35.76576     | 7.82016      | 0.1119  |
| 4      | 13.987        | BV   | 0.1578      | 19.65191     | 1.68774      | 0.0615  |
| 5      | 14.213        | VB   | 0.1124      | 88.28443     | 10.91145     | 0.2761  |
| 6      | 15.231        | VV   | 0.0804      | 750.52655    | 140.31758    | 2.3474  |
| 7      | 16.480        | BV   | 0.0813      | 87.05302     | 16.56549     | 0.2723  |
| 8      | 16.787        | VB   | 0.0843      | 200.55069    | 36.40348     | 0.6272  |
| 9      | 17.402        | BV   | 0.0832      | 244.03952    | 45.06736     | 0.7633  |

Data File C:\CHEM32\1\DATA\LAXMAN\LD-V-155-1A0001.D  
Sample Name: LD-V-155-1A-run1

| Peak #   | RetTime [min] | Type | Width [min] | Area [mAU*s] | Height [mAU] | Area % |
|----------|---------------|------|-------------|--------------|--------------|--------|
| 10       | 17.586        | VB   | 0.1047      | 37.94374     | 5.22775      | 0.1187 |
| 11       | 18.548        | BB   | 0.0999      | 15.19789     | 2.27553      | 0.0475 |
| 12       | 19.214        | BB   | 0.0957      | 43.13522     | 6.65227      | 0.1349 |
| 13       | 19.789        | BB   | 0.1042      | 261.74756    | 36.26916     | 0.8186 |
| Totals : |               |      |             | 3.19732e4    | 3172.31167   |        |

Signal 4: DAD1 D, Sig=230,16 Ref=off

| Peak #   | RetTime [min] | Type | Width [min] | Area [mAU*s] | Height [mAU] | Area %  |
|----------|---------------|------|-------------|--------------|--------------|---------|
| 1        | 1.909         | BB   | 0.1103      | 64.22646     | 9.81579      | 0.1960  |
| 2        | 12.971        | BV   | 0.1748      | 2.95450e4    | 2762.10352   | 90.1549 |
| 3        | 13.317        | VB   | 0.0877      | 2179.68066   | 387.20401    | 6.6512  |
| 4        | 15.232        | BV   | 0.0813      | 588.52106    | 108.53487    | 1.7958  |
| 5        | 16.788        | VB   | 0.0830      | 164.31732    | 30.45298     | 0.5014  |
| 6        | 19.791        | VV   | 0.1089      | 229.63806    | 30.12724     | 0.7007  |
| Totals : |               |      |             | 3.27713e4    | 3328.23841   |         |

Signal 5: DAD1 E, Sig=240,4 Ref=off

| Peak #   | RetTime [min] | Type | Width [min] | Area [mAU*s] | Height [mAU] | Area %  |
|----------|---------------|------|-------------|--------------|--------------|---------|
| 1        | 12.970        | BV   | 0.1595      | 2.78349e4    | 2861.06689   | 91.6270 |
| 2        | 13.317        | VB   | 0.0877      | 1778.19116   | 315.66486    | 5.8535  |
| 3        | 15.232        | BV   | 0.0815      | 446.13184    | 81.93338     | 1.4686  |
| 4        | 16.788        | BV   | 0.0820      | 134.76234    | 25.35521     | 0.4436  |
| 5        | 19.791        | VB   | 0.1138      | 184.50830    | 22.95249     | 0.6074  |
| Totals : |               |      |             | 3.03785e4    | 3306.97284   |         |

Signal 6: DAD1 F, Sig=280,16 Ref=off

| Peak # | RetTime [min] | Type | Width [min] | Area [mAU*s] | Height [mAU] | Area %  |
|--------|---------------|------|-------------|--------------|--------------|---------|
| 1      | 12.968        | BV   | 0.1313      | 1.93204e4    | 2365.42163   | 92.6736 |
| 2      | 13.317        | VB   | 0.0878      | 1085.78162   | 192.58340    | 5.2082  |
| 3      | 15.232        | BV   | 0.0810      | 302.56723    | 56.02794     | 1.4513  |
| 4      | 19.789        | BB   | 0.1053      | 139.03084    | 19.01400     | 0.6669  |

Data File C:\CHEM32\1\DATA\LAXMAN\LD-V-155-1A0001.D  
Sample Name: LD-V-155-1A-run1

Totals : 2.08477e4 2633.04697

Signal 7: DAD1 G, Sig=300,16 Ref=off

| Peak # | RetTime [min] | Type | Width [min] | Area [mAU*s] | Height [mAU] | Area %  |
|--------|---------------|------|-------------|--------------|--------------|---------|
| 1      | 12.968        | BV   | 0.1321      | 1.83907e4    | 2233.27051   | 91.3035 |
| 2      | 13.317        | VB   | 0.0875      | 1356.34009   | 241.75505    | 6.7338  |
| 3      | 15.232        | BV   | 0.0823      | 263.98782    | 47.88708     | 1.3106  |
| 4      | 19.790        | BB   | 0.1094      | 131.35910    | 17.14645     | 0.6522  |

Totals : 2.01423e4 2540.05910

Signal 8: DAD1 H, Sig=320,16 Ref=off

| Peak # | RetTime [min] | Type | Width [min] | Area [mAU*s] | Height [mAU] | Area %  |
|--------|---------------|------|-------------|--------------|--------------|---------|
| 1      | 12.968        | BV   | 0.1217      | 1.06545e4    | 1356.26221   | 90.4901 |
| 2      | 13.315        | VB   | 0.0905      | 890.75409    | 156.25275    | 7.5653  |
| 3      | 15.232        | BV   | 0.0826      | 148.63684    | 26.85264     | 1.2624  |
| 4      | 19.790        | BB   | 0.1090      | 80.32684     | 10.53331     | 0.6822  |

Totals : 1.17742e4 1549.90090

=====  
\*\*\* End of Report \*\*\*

<sup>1</sup>H NMR (CDCl<sub>3</sub>, 500 MHz) Compound 14

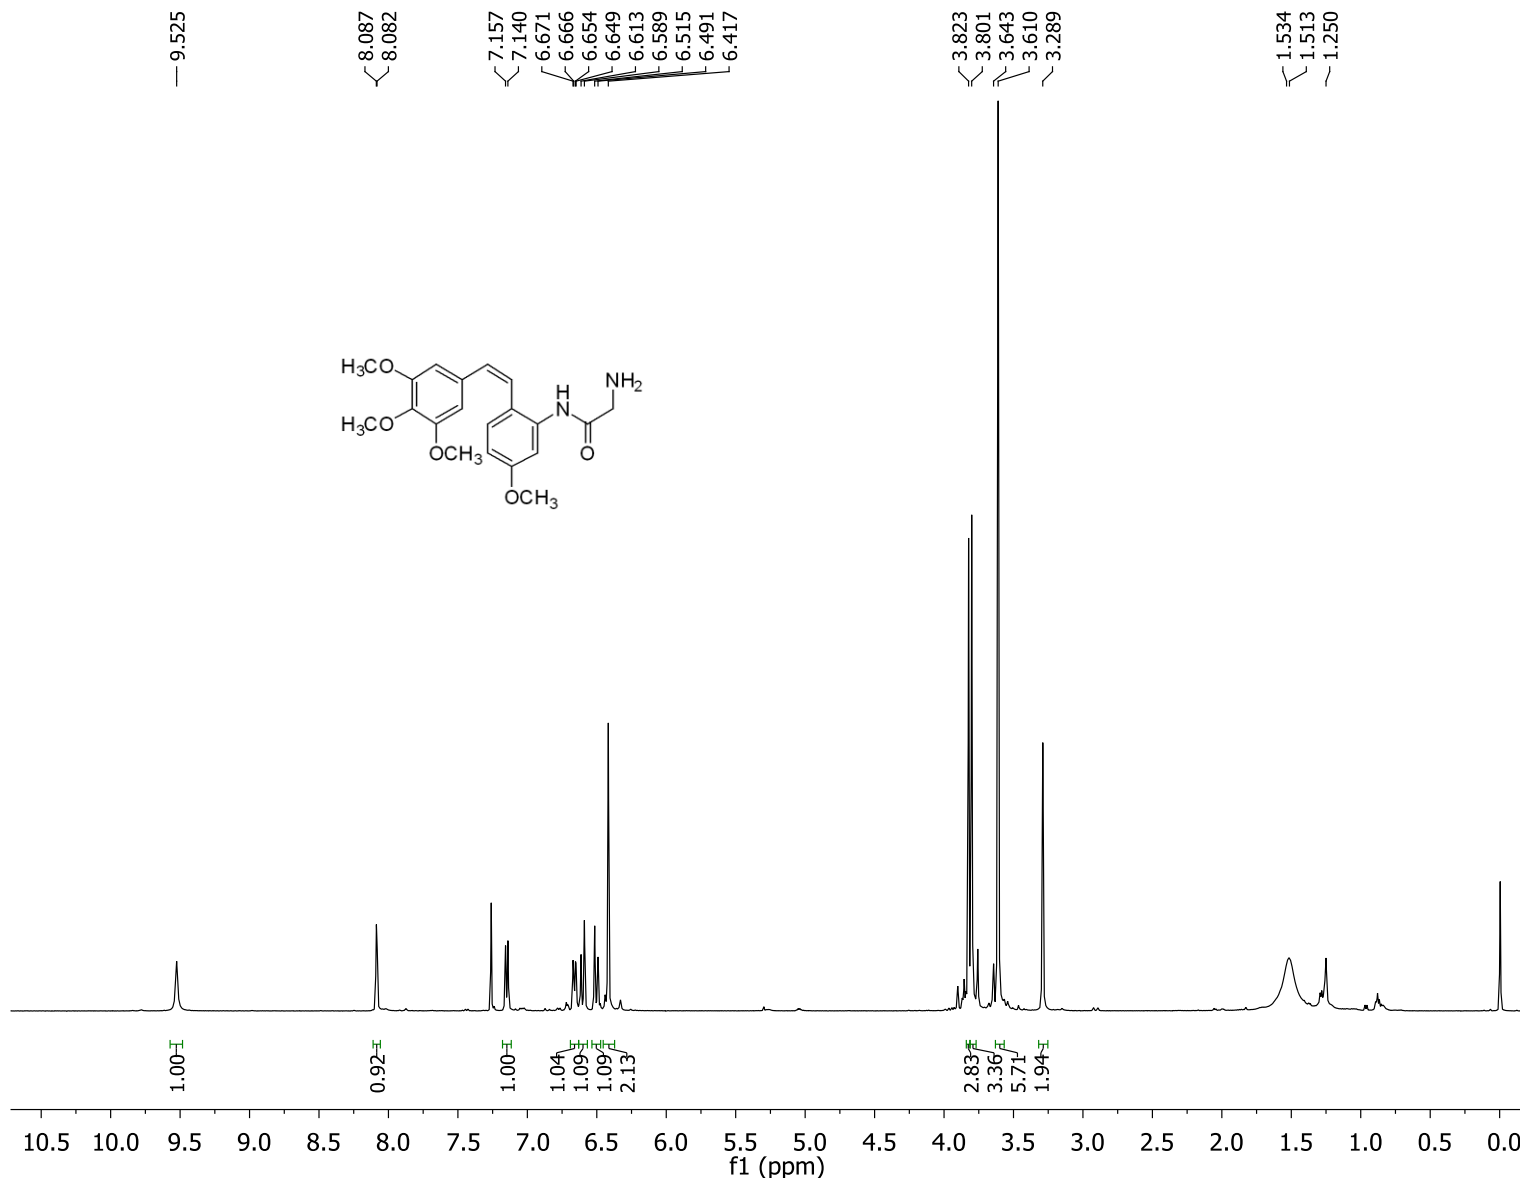

<sup>13</sup>C NMR (CDCl<sub>3</sub>, 125 MHz) Compound **14**

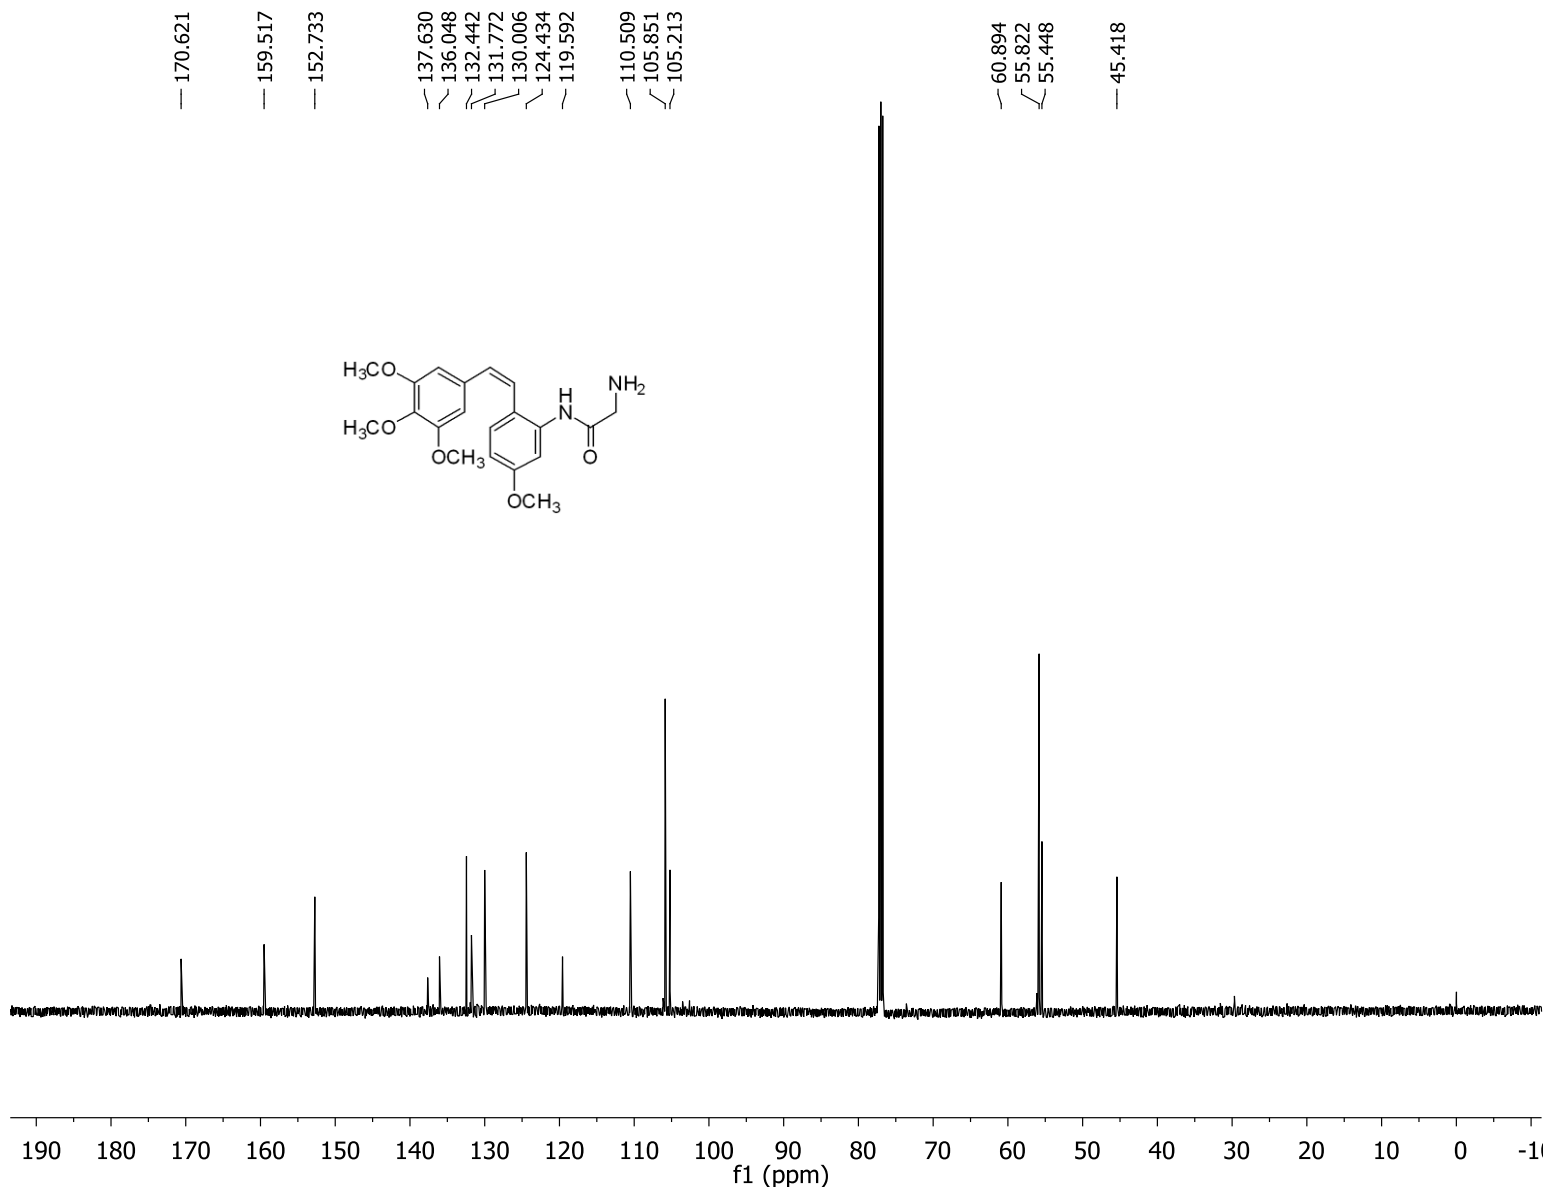



# HRMS Compound 14

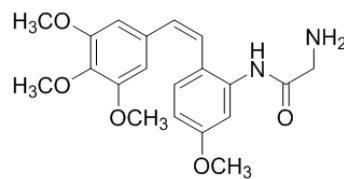

Chemical Formula:  $C_{20}H_{24}N_2O_5$   
Exact Mass: 372.1685

NL:  
1.98E9  
LD-III-111-1A\_ESI  
+Orb#11 RT: 0.10  
AV: 1 T: FTMS+p  
ESI Full ms  
[100.00-1000.00]

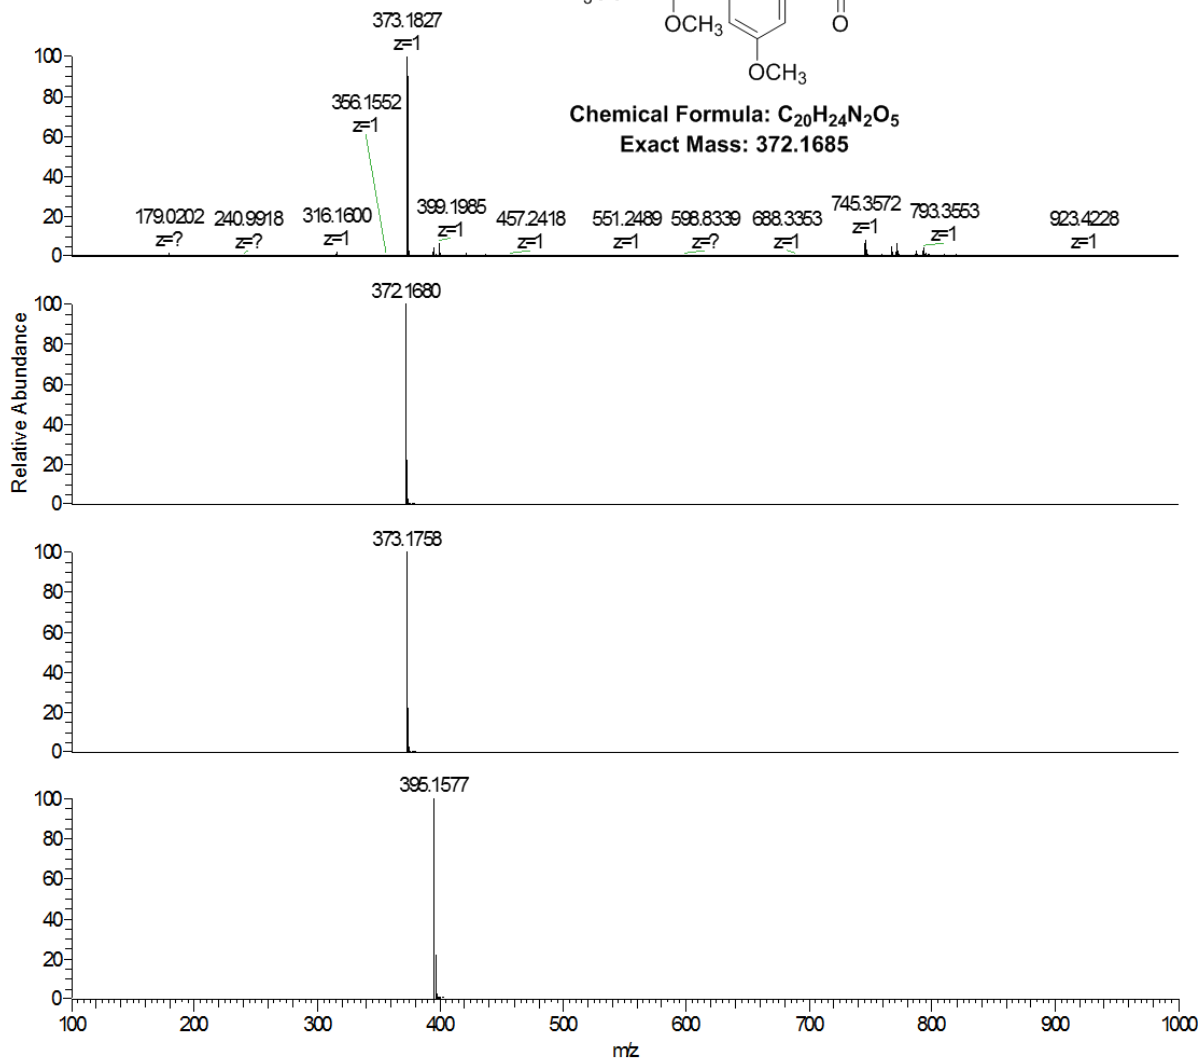

NL:  
7.89E5  
 $C_{20}H_{24}N_2O_5$   
 $C_{20}H_{24}N_2O_5$   
pa Chrg 1

NL:  
7.89E5  
 $C_{20}H_{24}N_2O_5 + H$   
 $C_{20}H_{25}N_2O_5$   
pa Chrg 1

NL:  
7.89E5  
 $C_{20}H_{24}N_2O_5 + Na$   
 $C_{20}H_{24}N_2O_5 Na_1$   
pa Chrg 1

# HPLC for Compound 14

Data File C:\CHEM32\1\DATA\LAXMAN\LD-III-111\RUN6-GOOD-0.1TFA\LDIII111RUN0006.D  
Sample Name: LD-III-111-run6

=====  
Acq. Operator : Laxman  
Acq. Instrument : Instrument 1 Location : -  
Injection Date : 7/9/2013 9:00:02 PM  
Acq. Method : C:\CHEM32\1\METHODS\MASTERMETHOD.M  
Last changed : 7/9/2013 6:17:01 PM by Laxman  
Analysis Method : C:\CHEM32\1\DATA\LAXMAN\LD-III-111\RUN6-GOOD-0.1TFA\LDIII111RUN0006.D\DA.M (MASTERMETHOD.M)  
Last changed : 4/1/2014 10:55:34 AM by ZHE  
Sample Info : Method- Mastermethod  
0.1% TFA in Water

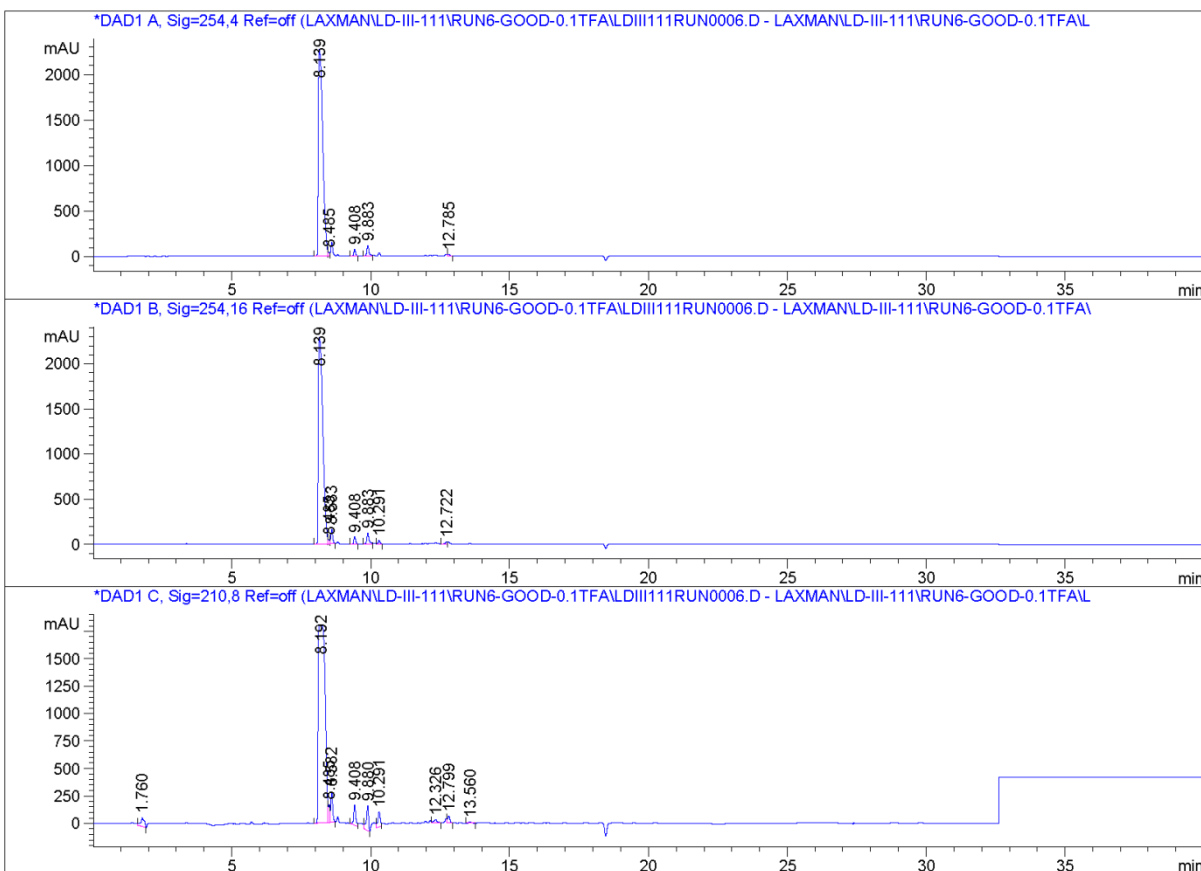

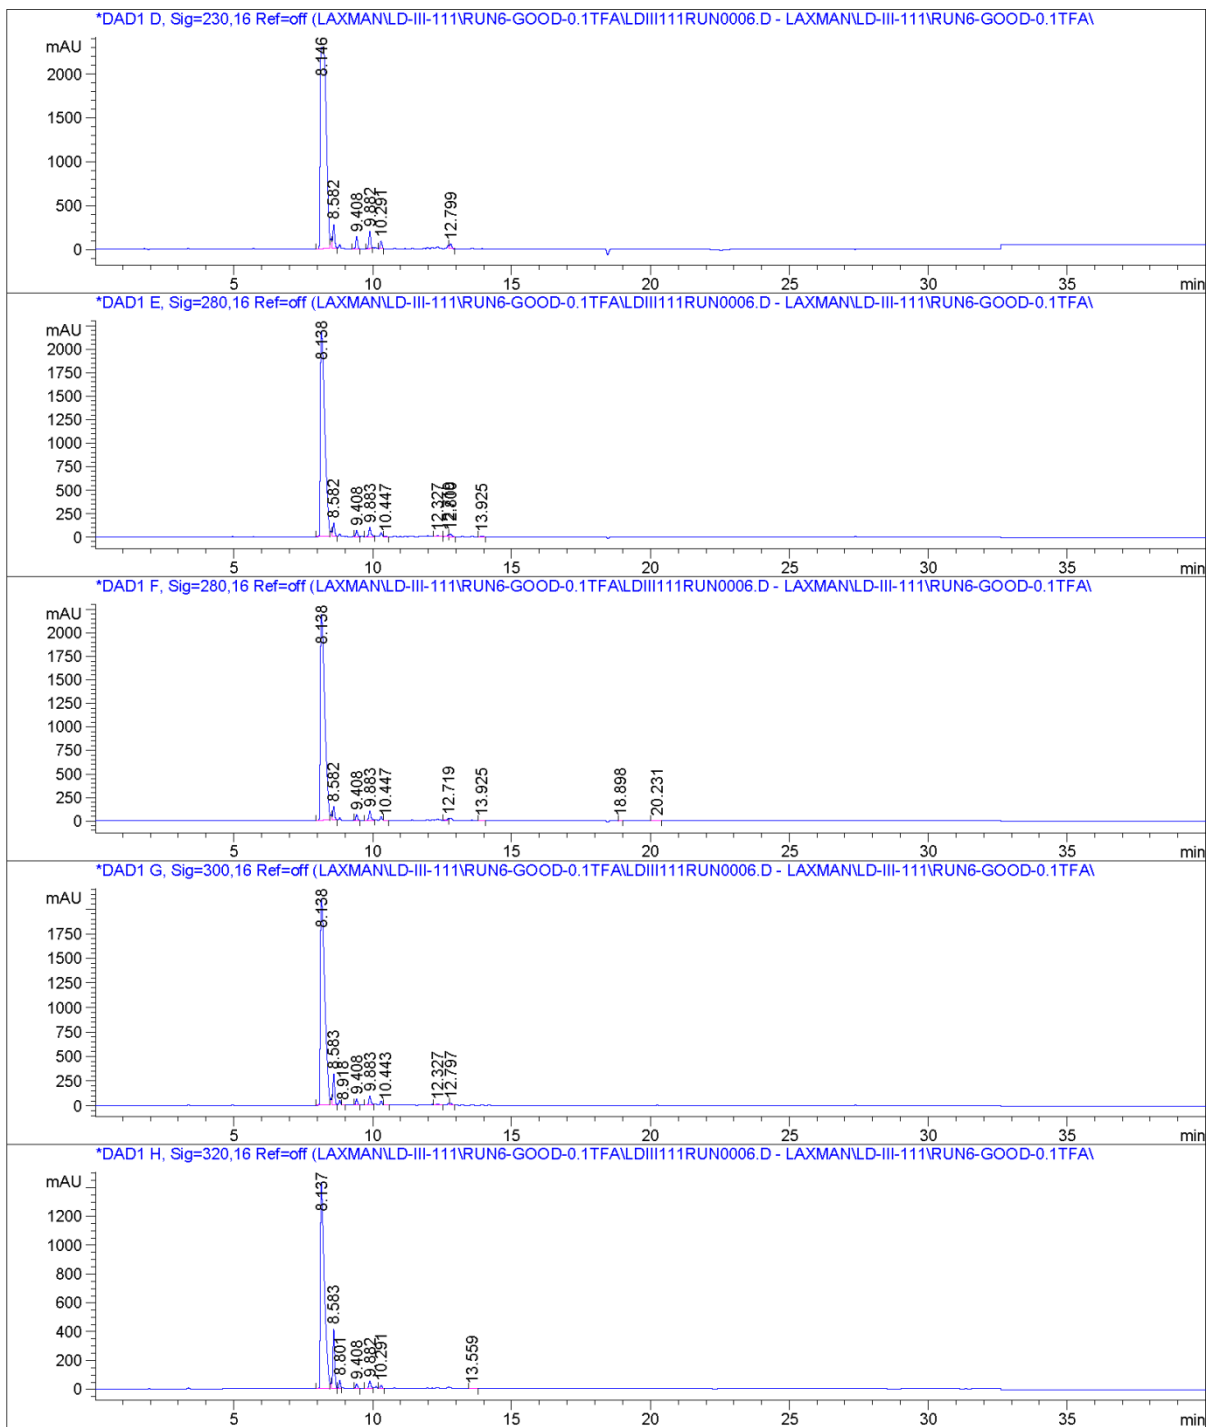

=====  
Area Percent Report  
=====

Sorted By : Signal  
Multiplier : 1.0000  
Dilution : 1.0000  
Use Multiplier & Dilution Factor with ISTDs

Signal 1: DAD1 A, Sig=254,4 Ref=off  
Signal has been modified after loading from rawdata file!

| Peak # | RetTime [min] | Type | Width [min] | Area [mAU*s] | Height [mAU] | Area %  |
|--------|---------------|------|-------------|--------------|--------------|---------|
| 1      | 8.139         | BV   | 0.1754      | 2.51894e4    | 2271.24341   | 95.4505 |
| 2      | 8.485         | VV   | 0.0515      | 142.75304    | 42.16708     | 0.5409  |
| 3      | 9.408         | BV   | 0.0674      | 326.38943    | 74.15012     | 1.2368  |
| 4      | 9.883         | BV   | 0.0796      | 640.42310    | 117.46875    | 2.4268  |
| 5      | 12.785        | VB   | 0.0730      | 91.04413     | 19.30842     | 0.3450  |

Totals : 2.63900e4 2524.33778

Signal 2: DAD1 B, Sig=254,16 Ref=off  
Signal has been modified after loading from rawdata file!

| Peak # | RetTime [min] | Type | Width [min] | Area [mAU*s] | Height [mAU] | Area %  |
|--------|---------------|------|-------------|--------------|--------------|---------|
| 1      | 8.139         | BV   | 0.1799      | 2.58701e4    | 2288.13721   | 92.2516 |
| 2      | 8.485         | VV   | 0.0526      | 167.77173    | 48.26380     | 0.5983  |
| 3      | 8.583         | VB   | 0.0693      | 721.26178    | 158.01703    | 2.5720  |
| 4      | 9.408         | BV   | 0.0674      | 337.57236    | 76.65775     | 1.2038  |
| 5      | 9.883         | BV   | 0.0794      | 656.34247    | 120.76386    | 2.3405  |
| 6      | 10.291        | VB   | 0.0718      | 171.31871    | 37.16681     | 0.6109  |
| 7      | 12.722        | BV   | 0.0809      | 118.60592    | 21.33296     | 0.4229  |

Totals : 2.80430e4 2750.33941

Signal 3: DAD1 C, Sig=210,8 Ref=off  
Signal has been modified after loading from rawdata file!

| Peak # | RetTime [min] | Type | Width [min] | Area [mAU*s] | Height [mAU] | Area %  |
|--------|---------------|------|-------------|--------------|--------------|---------|
| 1      | 1.760         | VB   | 0.1147      | 713.67432    | 81.08369     | 1.9280  |
| 2      | 8.192         | BV   | 0.2641      | 3.05965e4    | 1801.82019   | 82.6552 |
| 3      | 8.485         | VV   | 0.0556      | 607.23651    | 162.55066    | 1.6404  |

Data File C:\CHEM32\1\DATA\LAXMAN\LD-III-111\RUN6-GOOD-0.1TFA\LDIII111RUN0006.D  
Sample Name: LD-III-111-run6

| Peak # | RetTime [min] | Type | Width [min] | Area [mAU*s] | Height [mAU] | Area % |
|--------|---------------|------|-------------|--------------|--------------|--------|
| 4      | 8.582         | VB   | 0.0698      | 1298.44763   | 281.44962    | 3.5077 |
| 5      | 9.408         | BV   | 0.0794      | 991.03918    | 182.45256    | 2.6772 |
| 6      | 9.880         | VB   | 0.0838      | 1236.96521   | 226.01939    | 3.3416 |
| 7      | 10.291        | VV   | 0.0889      | 863.00427    | 141.99573    | 2.3314 |
| 8      | 12.326        | VB   | 0.1201      | 283.79422    | 32.43545     | 0.7667 |
| 9      | 12.799        | VV   | 0.0854      | 353.40680    | 63.03465     | 0.9547 |
| 10     | 13.560        | BV   | 0.0934      | 72.98273     | 11.92350     | 0.1972 |

Totals : 3.70171e4 2984.76544

Signal 4: DAD1 D, Sig=230,16 Ref=off  
Signal has been modified after loading from rawdata file!

| Peak # | RetTime [min] | Type | Width [min] | Area [mAU*s] | Height [mAU] | Area %  |
|--------|---------------|------|-------------|--------------|--------------|---------|
| 1      | 8.146         | BV   | 0.2404      | 3.43759e4    | 2300.19604   | 90.7117 |
| 2      | 8.582         | VB   | 0.0695      | 1254.74963   | 273.39069    | 3.3111  |
| 3      | 9.408         | BV   | 0.0685      | 651.16071    | 144.70052    | 1.7183  |
| 4      | 9.882         | BV   | 0.0693      | 926.08765    | 202.89774    | 2.4438  |
| 5      | 10.291        | BV   | 0.0704      | 385.79929    | 85.91025     | 1.0181  |
| 6      | 12.799        | VB   | 0.0832      | 302.09579    | 54.06322     | 0.7972  |

Totals : 3.78958e4 3061.15845

Signal 5: DAD1 E, Sig=280,16 Ref=off  
Signal has been modified after loading from rawdata file!

| Peak # | RetTime [min] | Type | Width [min] | Area [mAU*s] | Height [mAU] | Area %  |
|--------|---------------|------|-------------|--------------|--------------|---------|
| 1      | 8.138         | BV   | 0.1715      | 2.42665e4    | 2186.85913   | 93.0409 |
| 2      | 8.582         | VB   | 0.0692      | 656.98676    | 143.97168    | 2.5190  |
| 3      | 9.408         | VB   | 0.0680      | 282.83658    | 63.43553     | 1.0844  |
| 4      | 9.883         | BV   | 0.0788      | 524.90851    | 97.49480     | 2.0126  |
| 5      | 10.447        | VB   | 0.0706      | 8.61436      | 1.84189      | 0.0330  |
| 6      | 12.327        | VB   | 0.1122      | 90.34814     | 11.42952     | 0.3464  |
| 7      | 12.719        | BV   | 0.0755      | 94.46789     | 19.16719     | 0.3622  |
| 8      | 12.800        | VB   | 0.0819      | 142.46277    | 26.00443     | 0.5462  |
| 9      | 13.925        | BB   | 0.1102      | 14.42253     | 2.09712      | 0.0553  |

Totals : 2.60816e4 2552.30129

Data File C:\CHEM32\1\DATA\LAXMAN\LD-III-111\RUN6-GOOD-0.1TFA\LDIII111RUN0006.D  
Sample Name: LD-III-111-run6

Signal 6: DAD1 F, Sig=280,16 Ref=off  
Signal has been modified after loading from rawdata file!

| Peak # | RetTime [min] | Type | Width [min] | Area [mAU*s] | Height [mAU] | Area %  |
|--------|---------------|------|-------------|--------------|--------------|---------|
| 1      | 8.138         | BV   | 0.1715      | 2.42665e4    | 2186.85913   | 93.7362 |
| 2      | 8.582         | VB   | 0.0692      | 656.98676    | 143.97168    | 2.5378  |
| 3      | 9.408         | VB   | 0.0680      | 282.83658    | 63.43553     | 1.0925  |
| 4      | 9.883         | BV   | 0.0788      | 524.90851    | 97.49480     | 2.0276  |
| 5      | 10.447        | VB   | 0.0706      | 8.61436      | 1.84189      | 0.0333  |
| 6      | 12.719        | BV   | 0.0755      | 94.46789     | 19.16719     | 0.3649  |
| 7      | 13.925        | BB   | 0.1102      | 14.42253     | 2.09712      | 0.0557  |
| 8      | 18.898        | VB   | 0.1124      | 30.22587     | 3.81837      | 0.1168  |
| 9      | 20.231        | BB   | 0.0976      | 9.12180      | 1.40804      | 0.0352  |

Totals : 2.58881e4 2520.09375

Signal 7: DAD1 G, Sig=300,16 Ref=off  
Signal has been modified after loading from rawdata file!

| Peak # | RetTime [min] | Type | Width [min] | Area [mAU*s] | Height [mAU] | Area %  |
|--------|---------------|------|-------------|--------------|--------------|---------|
| 1      | 8.138         | BV   | 0.1723      | 2.34731e4    | 2101.46777   | 90.7065 |
| 2      | 8.583         | VB   | 0.0679      | 1408.04065   | 316.57404    | 5.4410  |
| 3      | 8.918         | VB   | 0.0565      | 13.70495     | 3.76272      | 0.0530  |
| 4      | 9.408         | VB   | 0.0681      | 275.41730    | 61.68370     | 1.0643  |
| 5      | 9.883         | BV   | 0.0795      | 513.82751    | 94.44556     | 1.9856  |
| 6      | 10.443        | VB   | 0.0686      | 8.27514      | 1.83509      | 0.0320  |
| 7      | 12.327        | VB   | 0.1099      | 91.84422     | 11.91732     | 0.3549  |
| 8      | 12.797        | VB   | 0.0747      | 93.86009     | 18.64861     | 0.3627  |

Totals : 2.58781e4 2610.33480

Signal 8: DAD1 H, Sig=320,16 Ref=off  
Signal has been modified after loading from rawdata file!

| Peak # | RetTime [min] | Type | Width [min] | Area [mAU*s] | Height [mAU] | Area %  |
|--------|---------------|------|-------------|--------------|--------------|---------|
| 1      | 8.137         | BV   | 0.1477      | 1.41791e4    | 1430.12402   | 84.7866 |
| 2      | 8.583         | VB   | 0.0668      | 1786.22986   | 410.09262    | 10.6811 |
| 3      | 8.801         | BV   | 0.0635      | 214.57774    | 52.71780     | 1.2831  |
| 4      | 9.408         | VB   | 0.0681      | 151.69165    | 33.99868     | 0.9071  |
| 5      | 9.882         | BV   | 0.0780      | 268.97385    | 50.61902     | 1.6084  |
| 6      | 10.291        | VV   | 0.0737      | 110.94556    | 23.25360     | 0.6634  |
| 7      | 13.559        | BB   | 0.0920      | 11.75747     | 1.90529      | 0.0703  |

Data File C:\CHEM32\1\DATA\LAXMAN\LD-III-111\RUN6-GOOD-0.1TFA\LDIII111RUN0006.D  
Sample Name: LD-III-111-run6

| Peak #                                    | RetTime [min] | Type | Width [min] | Area [mAU*s] | Height [mAU] | Area % |
|-------------------------------------------|---------------|------|-------------|--------------|--------------|--------|
| ----- ----- ----- ----- ----- ----- ----- |               |      |             |              |              |        |
| Totals :                                  |               |      |             | 1.67233e4    | 2002.71104   |        |

=====  
\*\*\* End of Report \*\*\*

<sup>1</sup>H NMR (CD<sub>3</sub>OD, 600 MHz) Compound **15**

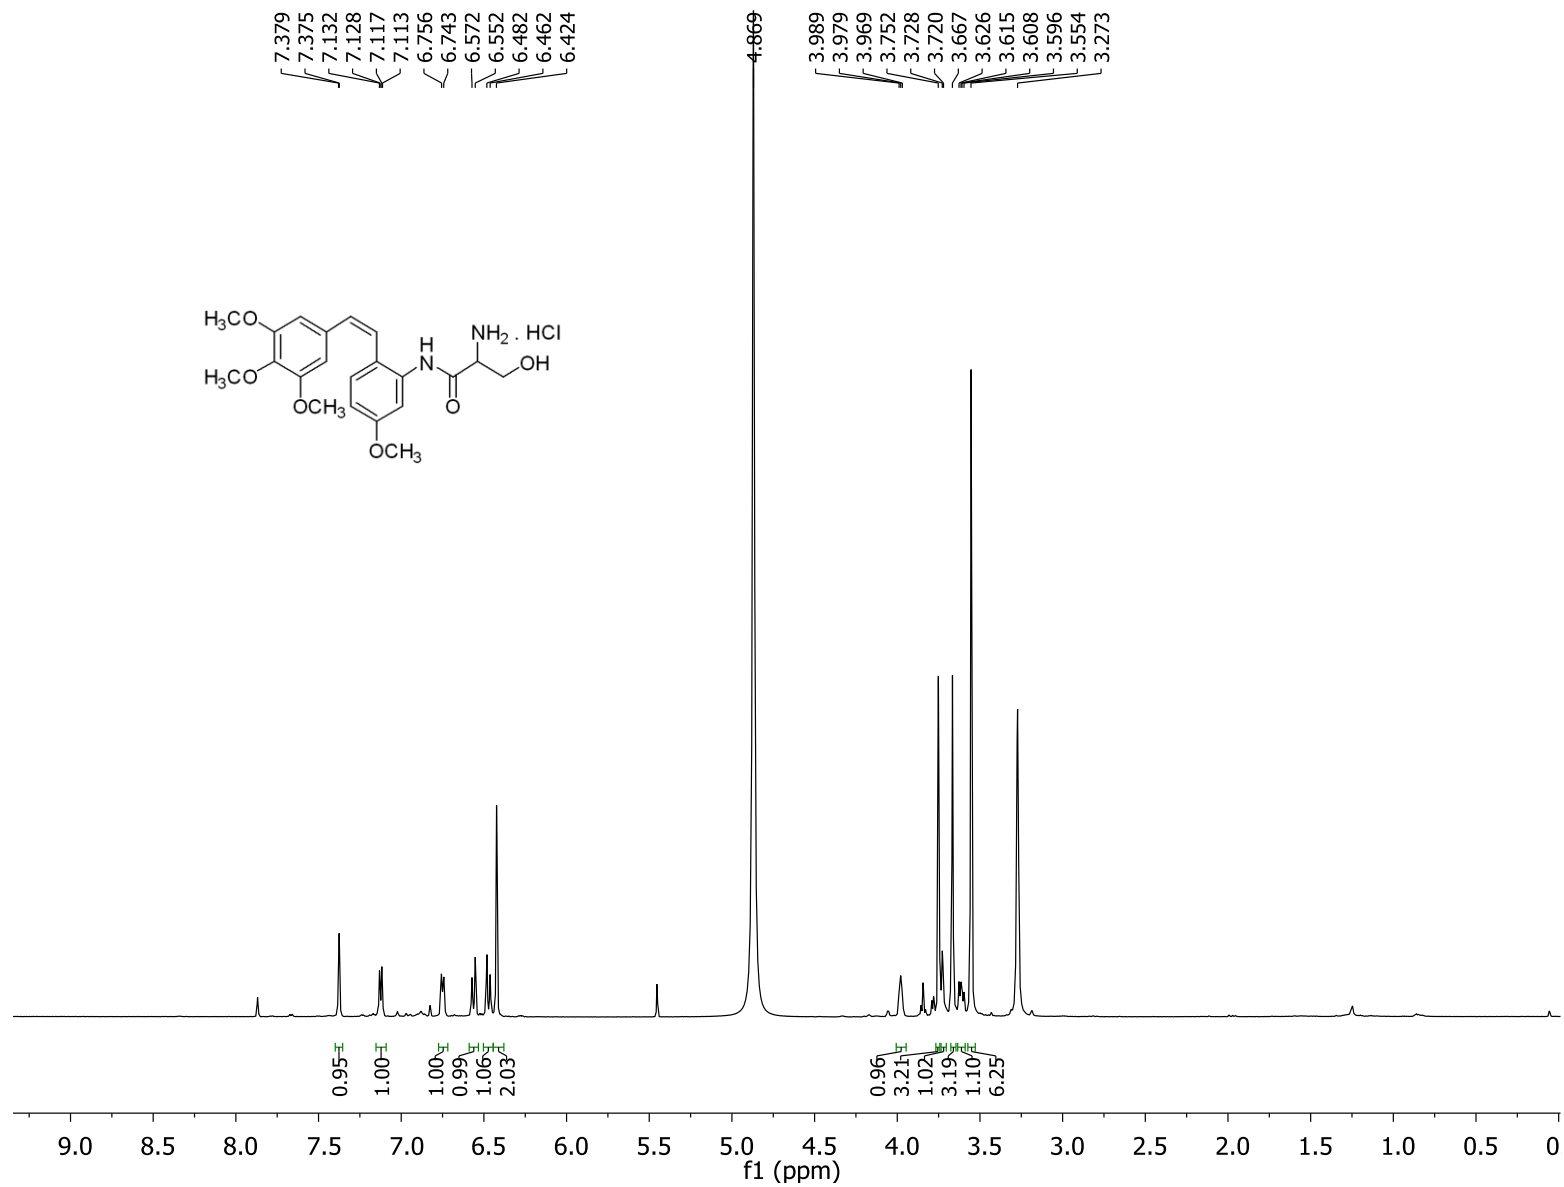



<sup>13</sup>C NMR (CD<sub>3</sub>OD, 150 MHz) Compound **15**

165.352  
159.382  
152.699

137.083  
135.258  
132.310  
131.574  
130.381  
124.796  
123.571

111.267  
109.518  
105.934

60.094  
59.701  
55.076  
54.866  
54.521

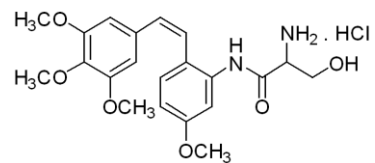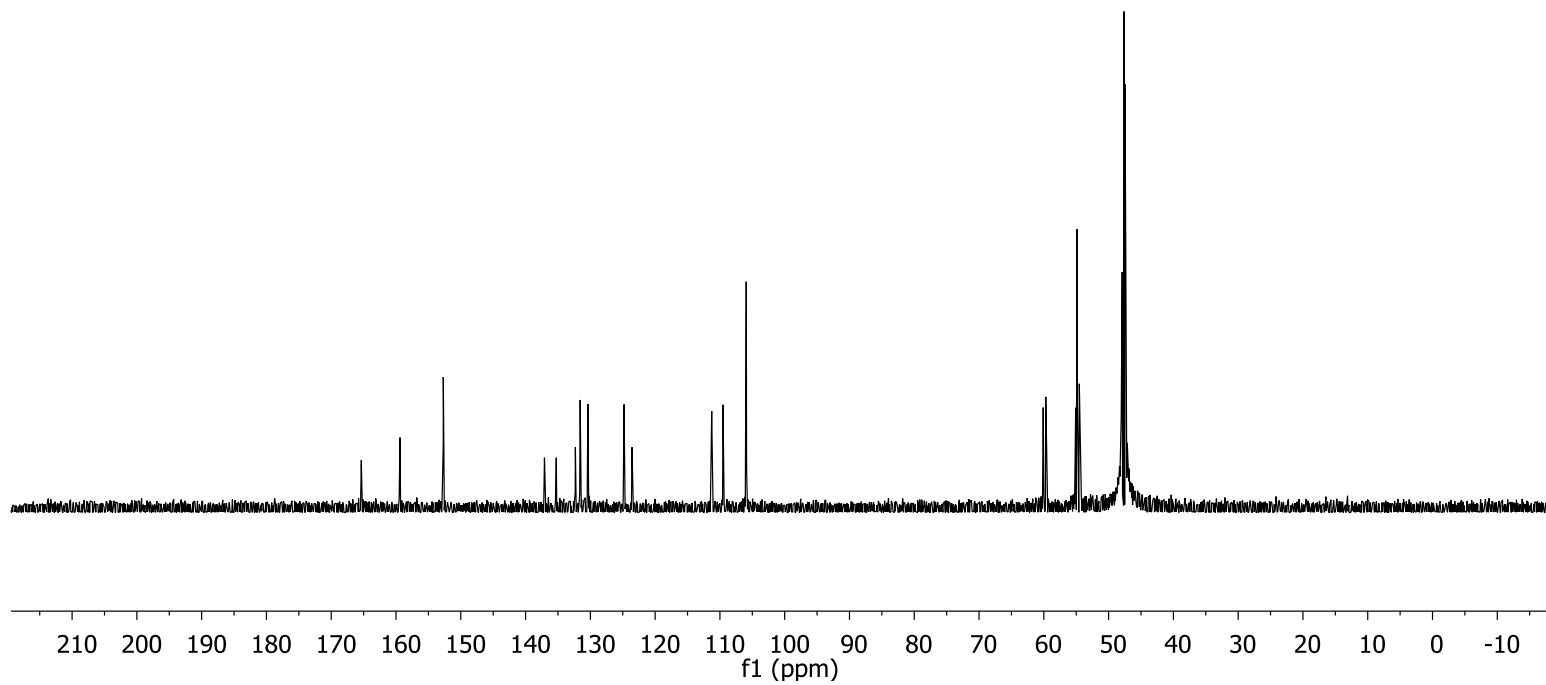

**S73**

### HRMS Compound 15

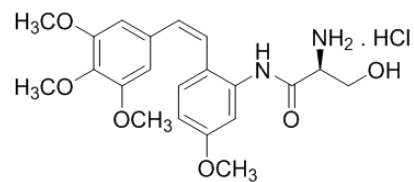

Chemical Formula:  $C_{21}H_{27}ClN_2O_6$   
 Exact Mass: 438.1558

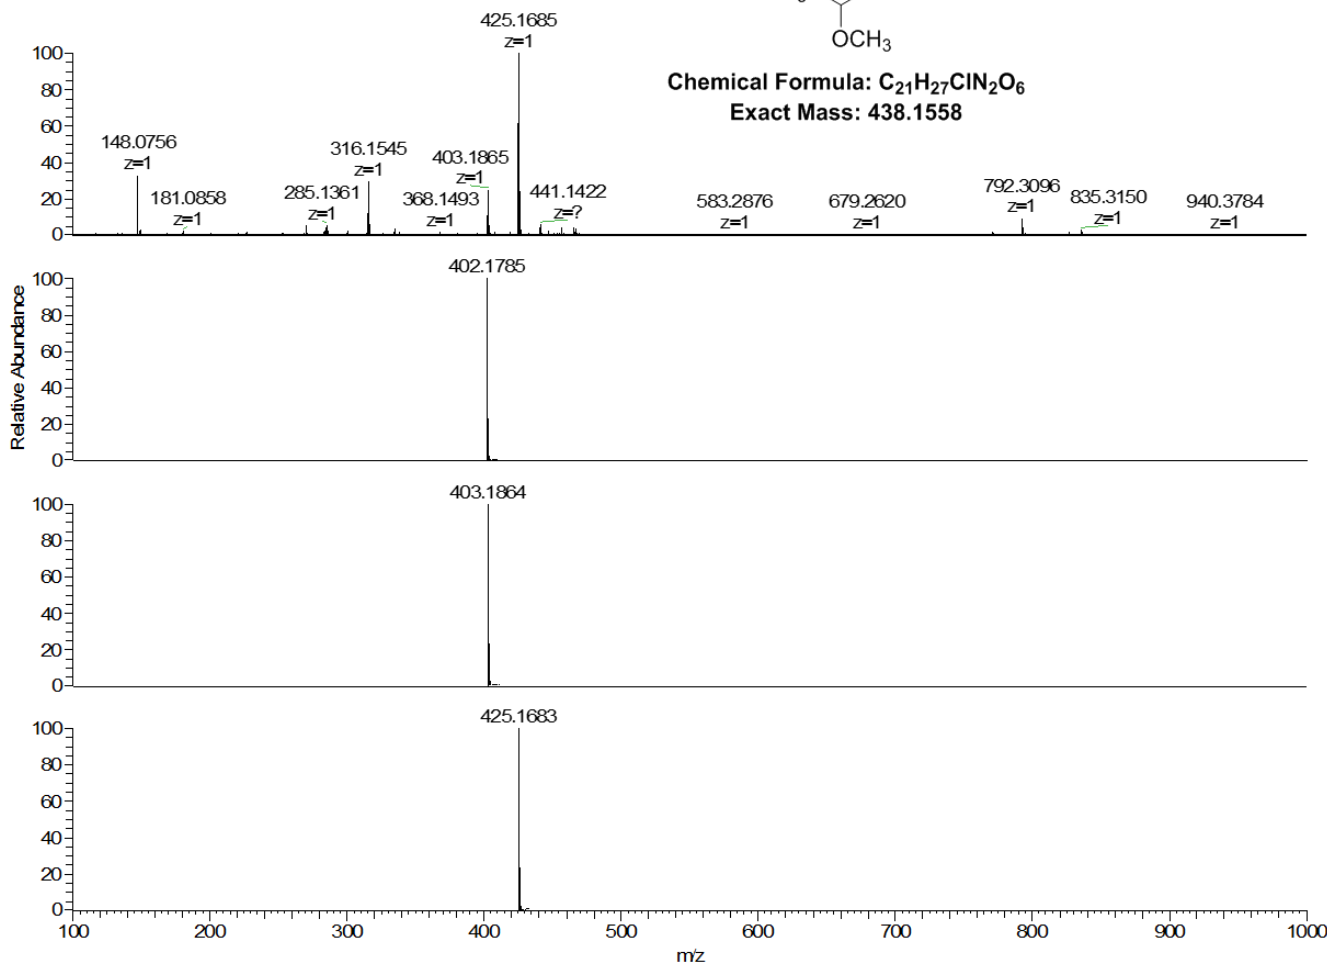

NL:  
 1.23E7  
 LD-VIII-07-1A\_Qtbl\_+  
 ES#12 RT: 0.10 AV:  
 1 T: FTMS + p ESI  
 Full ms  
 [100.00-1000.00]

NL:  
 7.78E5  
 $C_{21}H_{26}N_2O_6$ :  
 $C_{21}H_{26}N_2O_6$   
 pa Chrg 1

NL:  
 7.78E5  
 $C_{21}H_{26}N_2O_6 + H$ :  
 $C_{21}H_{27}N_2O_6$   
 pa Chrg 1

NL:  
 7.78E5  
 $C_{21}H_{26}N_2O_6 + Na$ :  
 $C_{21}H_{26}N_2O_6 Na_1$   
 pa Chrg 1

# HPLC for Compound 15

Data File C:\CHEM32\1\DATA\LAXMAN\LDVI-07-RUN0001.D

Sample Name: LD-VII-07-1A-run1

```
=====
Acq. Operator   : Laxman
Acq. Instrument : Instrument 1                Location : -
Injection Date  : 1/30/2015 11:04:00 AM
Acq. Method    : C:\CHEM32\1\METHODS\MASTERMETHOD2.M
Last changed   : 1/30/2015 11:00:11 AM by Laxman
Analysis Method : C:\CHEM32\1\DATA\LAXMAN\LDVI-07-RUN0001.D\DA.M (MASTERMETHOD2.M)
Last changed   : 1/30/2015 11:44:15 AM by Laxman
Sample Info    : Method-Mastermethod2.M
                0.1% TFA/H2O
```

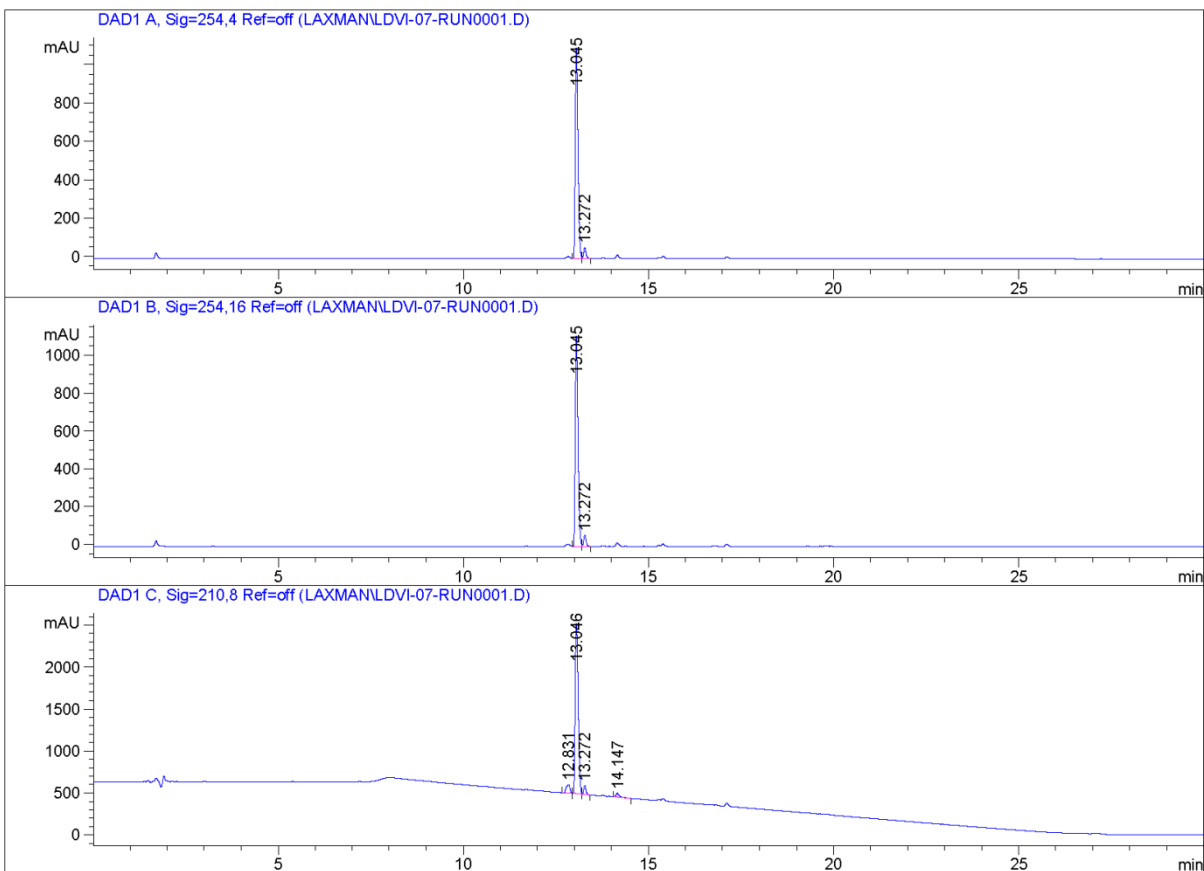

Data File C:\CHEM32\1\DATA\LAXMAN\LDVI-07-RUN0001.D  
Sample Name: LD-VII-07-1A-run1

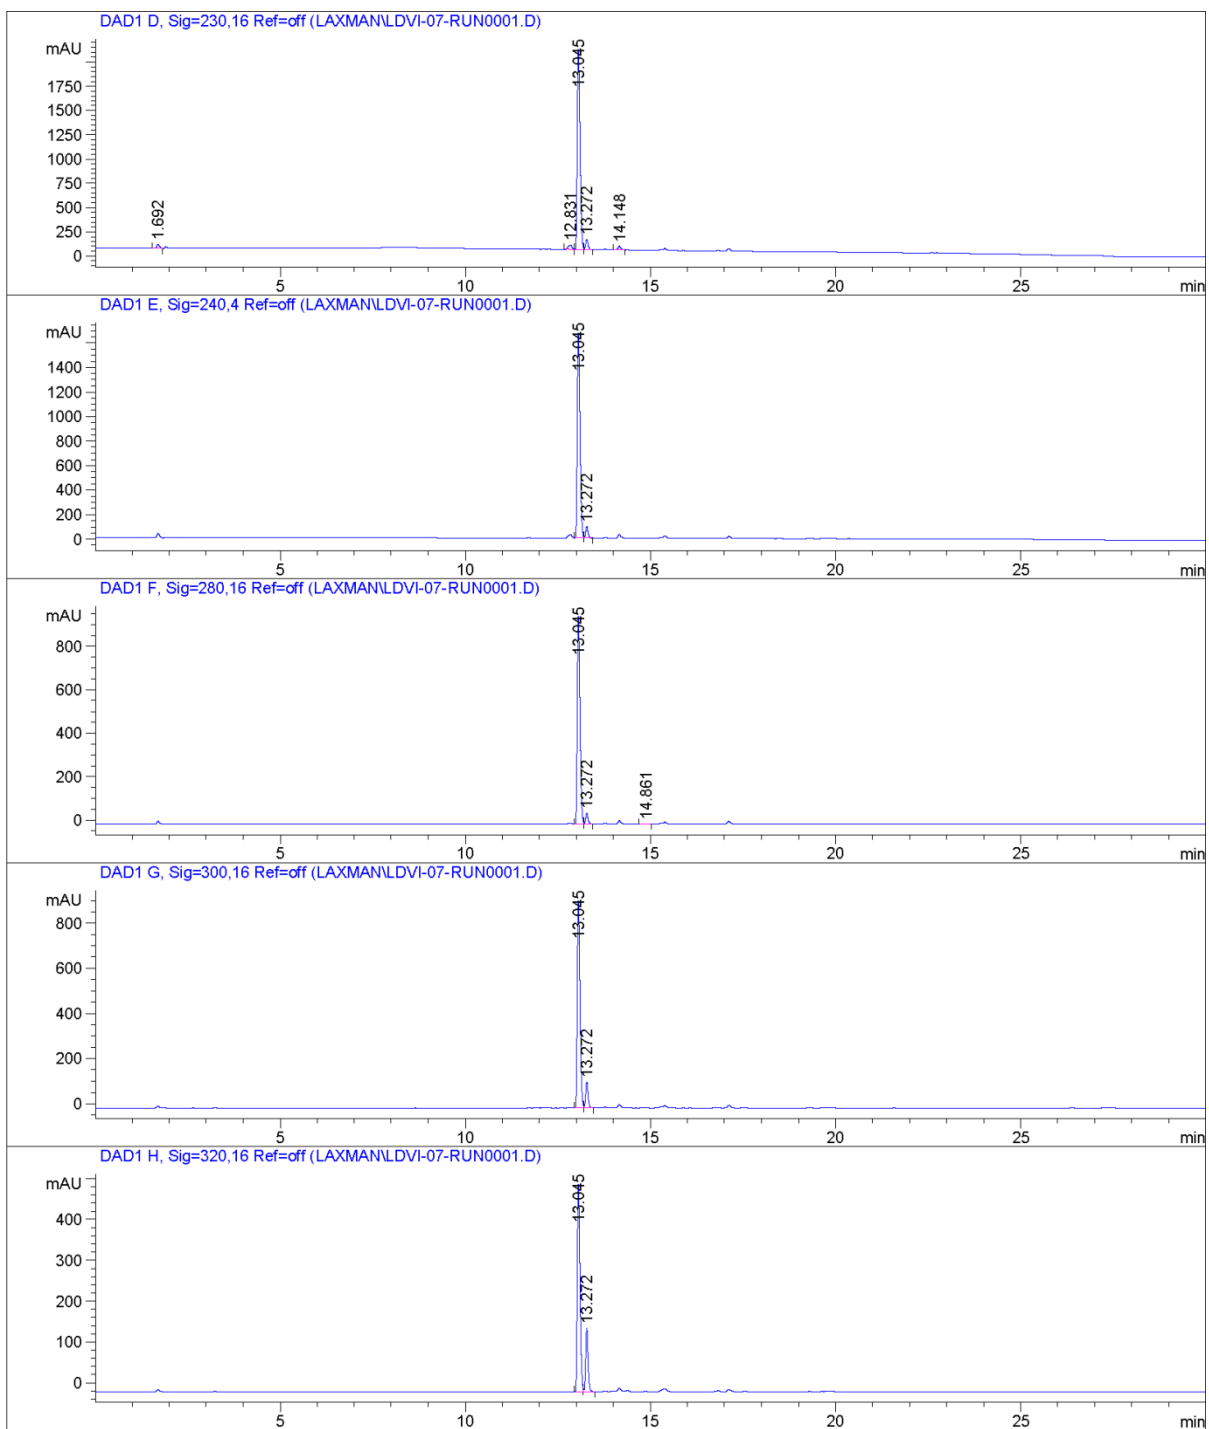

Data File C:\CHEM32\1\DATA\LAXMAN\LDVI-07-RUN0001.D  
Sample Name: LD-VII-07-1A-run1

=====  
Area Percent Report  
=====

Sorted By : Signal  
Multiplier : 1.0000  
Dilution : 1.0000  
Use Multiplier & Dilution Factor with ISTDs

Signal 1: DAD1 A, Sig=254,4 Ref=off

| Peak # | RetTime [min] | Type | Width [min] | Area [mAU*s] | Height [mAU] | Area %  |
|--------|---------------|------|-------------|--------------|--------------|---------|
| 1      | 13.045        | VV   | 0.0798      | 5641.81982   | 1100.64673   | 95.6171 |
| 2      | 13.272        | VV   | 0.0679      | 258.60953    | 58.10617     | 4.3829  |

Totals : 5900.42935 1158.75290

Signal 2: DAD1 B, Sig=254,16 Ref=off

| Peak # | RetTime [min] | Type | Width [min] | Area [mAU*s] | Height [mAU] | Area %  |
|--------|---------------|------|-------------|--------------|--------------|---------|
| 1      | 13.045        | VV   | 0.0798      | 5725.09717   | 1116.79260   | 95.6048 |
| 2      | 13.272        | VV   | 0.0679      | 263.19711    | 59.14703     | 4.3952  |

Totals : 5988.29428 1175.93963

Signal 3: DAD1 C, Sig=210,8 Ref=off

| Peak # | RetTime [min] | Type | Width [min] | Area [mAU*s] | Height [mAU] | Area %  |
|--------|---------------|------|-------------|--------------|--------------|---------|
| 1      | 12.831        | BB   | 0.1014      | 707.34418    | 101.35224    | 5.4677  |
| 2      | 13.046        | BV   | 0.0917      | 1.14252e4    | 2030.26953   | 88.3164 |
| 3      | 13.272        | VB   | 0.0674      | 483.14075    | 109.64965    | 3.7347  |
| 4      | 14.147        | VB   | 0.0927      | 320.98795    | 48.82853     | 2.4812  |

Totals : 1.29367e4 2290.09996

Data File C:\CHEM32\1\DATA\LAXMAN\LDVI-07-RUN0001.D  
Sample Name: LD-VII-07-1A-run1

Signal 4: DAD1 D, Sig=230,16 Ref=off

| Peak # | RetTime [min] | Type | Width [min] | Area [mAU*s] | Height [mAU] | Area %  |
|--------|---------------|------|-------------|--------------|--------------|---------|
| 1      | 1.692         | VB   | 0.0868      | 273.36813    | 45.01778     | 2.2595  |
| 2      | 12.831        | VV   | 0.1009      | 308.57629    | 43.41265     | 2.5505  |
| 3      | 13.045        | VV   | 0.0831      | 1.08210e4    | 2067.49194   | 89.4404 |
| 4      | 13.272        | VB   | 0.0677      | 469.66138    | 105.94901    | 3.8819  |
| 5      | 14.148        | VV   | 0.0830      | 225.95723    | 39.32711     | 1.8676  |

Totals : 1.20986e4 2301.19848

Signal 5: DAD1 E, Sig=240,4 Ref=off

| Peak # | RetTime [min] | Type | Width [min] | Area [mAU*s] | Height [mAU] | Area %  |
|--------|---------------|------|-------------|--------------|--------------|---------|
| 1      | 13.045        | VV   | 0.0800      | 8622.23145   | 1675.22180   | 95.2748 |
| 2      | 13.272        | VV   | 0.0678      | 427.61954    | 96.27460     | 4.7252  |

Totals : 9049.85098 1771.49640

Signal 6: DAD1 F, Sig=280,16 Ref=off

| Peak # | RetTime [min] | Type | Width [min] | Area [mAU*s] | Height [mAU] | Area %  |
|--------|---------------|------|-------------|--------------|--------------|---------|
| 1      | 13.045        | BV   | 0.0797      | 4888.63330   | 955.13538    | 95.3672 |
| 2      | 13.272        | VB   | 0.0677      | 227.55379    | 51.38308     | 4.4391  |
| 3      | 14.861        | BB   | 0.0931      | 9.93156      | 1.54229      | 0.1937  |

Totals : 5126.11865 1008.06074

Signal 7: DAD1 G, Sig=300,16 Ref=off

| Peak # | RetTime [min] | Type | Width [min] | Area [mAU*s] | Height [mAU] | Area %  |
|--------|---------------|------|-------------|--------------|--------------|---------|
| 1      | 13.045        | BV   | 0.0799      | 4717.08740   | 919.34308    | 90.2095 |
| 2      | 13.272        | VB   | 0.0672      | 511.94711    | 116.60598    | 9.7905  |

Totals : 5229.03452 1035.94906

Data File C:\CHEM32\1\DATA\LAXMAN\LDVI-07-RUN0001.D  
Sample Name: LD-VII-07-1A-run1

Signal 8: DAD1 H, Sig=320,16 Ref=off

| Peak # | RetTime [min] | Type | Width [min] | Area [mAU*s] | Height [mAU] | Area %  |
|--------|---------------|------|-------------|--------------|--------------|---------|
| 1      | 13.045        | BV   | 0.0801      | 2620.03906   | 508.46661    | 79.2579 |
| 2      | 13.272        | VB   | 0.0670      | 685.67603    | 156.98068    | 20.7421 |

Totals :                   3305.71509 665.44730

=====  
\*\*\* End of Report \*\*\*

<sup>1</sup>H NMR (CD<sub>3</sub>OD, 600 MHz) Compound **16**

7.370  
7.366  
7.131  
7.117  
6.736  
6.722  
6.718  
6.575  
6.556  
6.494  
6.475  
6.426

4.870

3.749  
3.672  
3.669  
3.627  
3.557  
3.274

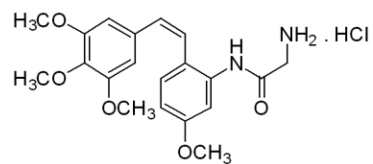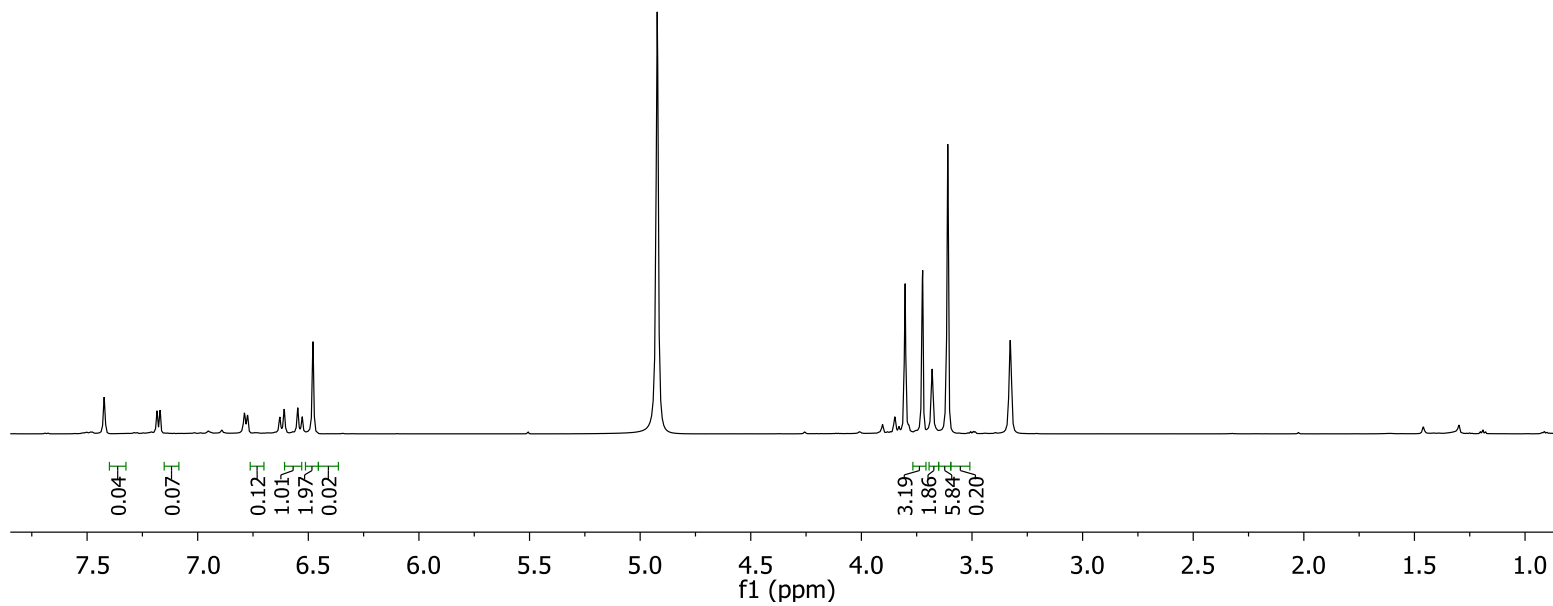

S80



<sup>13</sup>C NMR (CD<sub>3</sub>OD, 150 MHz) Compound 16

- 164.382
- 159.374
- 152.649
- 136.959
- 135.294
- 132.568
- 131.373
- 130.583
- 124.925
- 123.216
- 111.060
- 109.448
- 105.844
- 59.753
- 54.887
- 54.515
- 40.593

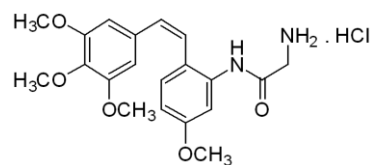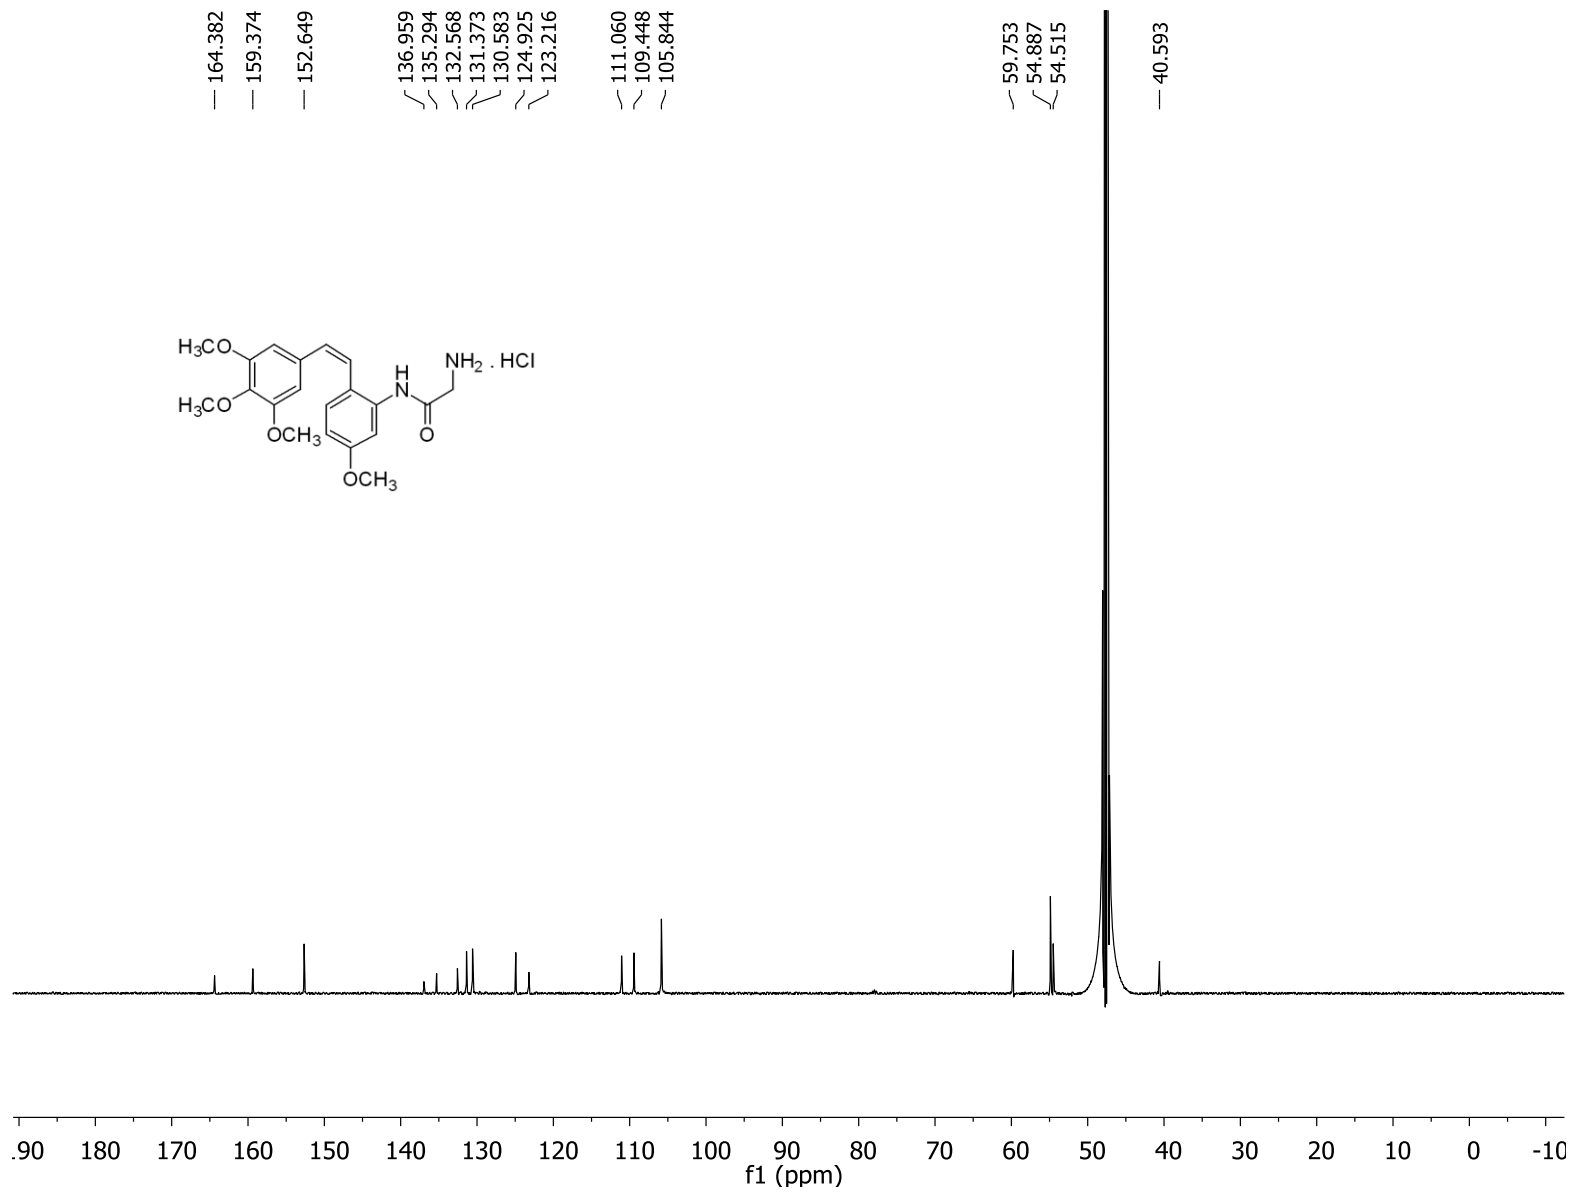

### HRMS Compound 16

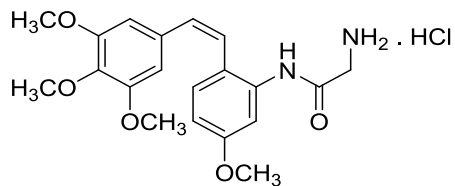

**Chemical Formula: C<sub>20</sub>H<sub>25</sub>ClN<sub>2</sub>O<sub>5</sub>**  
**Exact Mass: 408.1452**

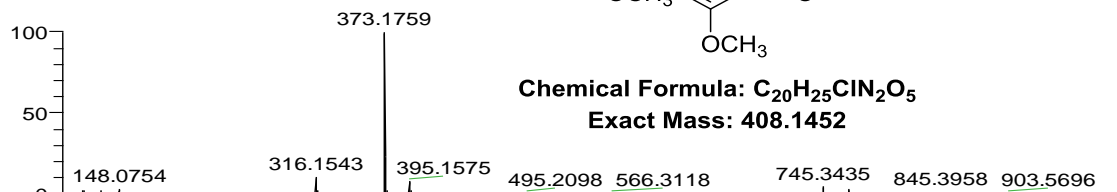

NL:  
1.03E8  
LD-VII-11\_Orbi\_+ES#1  
RT: 0.00 AV: 1 T: FTMS  
+ p ESI Full ms  
[100.00-1000.00]

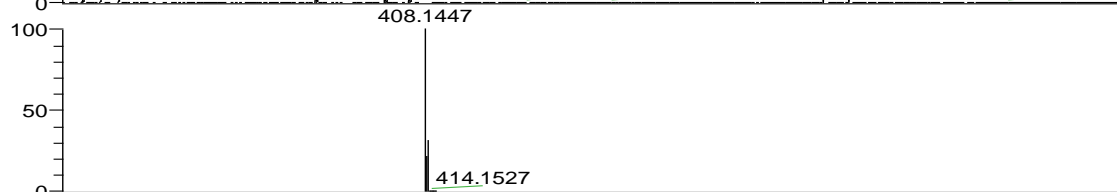

NL:  
5.98E5  
C<sub>20</sub>H<sub>25</sub>ClN<sub>2</sub>O<sub>5</sub>:  
C<sub>20</sub>H<sub>25</sub>Cl<sub>1</sub>N<sub>2</sub>O<sub>5</sub>  
pa Chrg 1

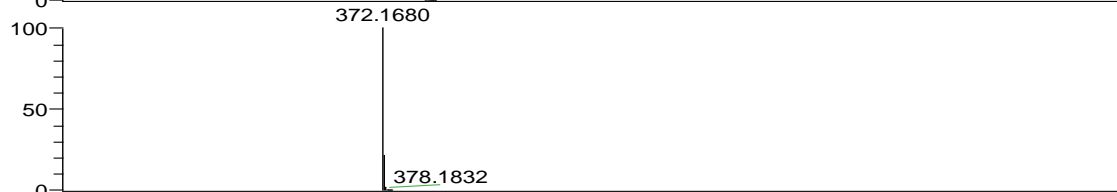

NL:  
7.89E5  
C<sub>20</sub>H<sub>24</sub>N<sub>2</sub>O<sub>5</sub>:  
C<sub>20</sub>H<sub>24</sub>N<sub>2</sub>O<sub>5</sub>  
pa Chrg 1

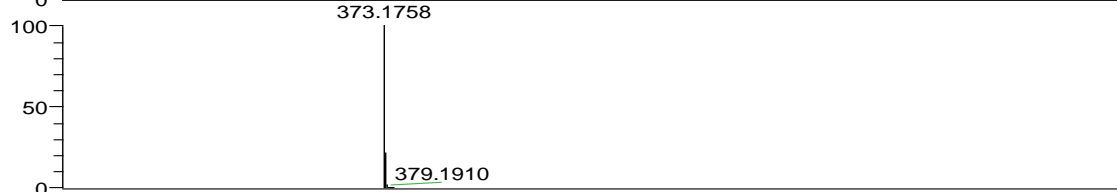

NL:  
7.89E5  
C<sub>20</sub>H<sub>24</sub>N<sub>2</sub>O<sub>5</sub> +H:  
C<sub>20</sub>H<sub>25</sub>N<sub>2</sub>O<sub>5</sub>  
pa Chrg 1

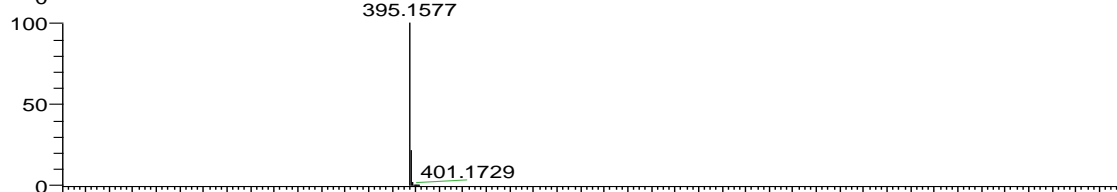

NL:  
7.89E5  
C<sub>20</sub>H<sub>24</sub>N<sub>2</sub>O<sub>5</sub> +Na:  
C<sub>20</sub>H<sub>24</sub>N<sub>2</sub>O<sub>5</sub>Na<sub>1</sub>  
pa Chrg 1

m/z

# HPLC for Compound 16

Data File C:\CHEM32\1\DATA\LAXMAN\LD-VII-13000001.D

Sample Name: LD-VII-13-1A-run1

```
=====
Acq. Operator   : Laxman
Acq. Instrument : Instrument 1                Location : -
Injection Date  : 1/30/2015 2:24:28 PM
Acq. Method     : C:\CHEM32\1\METHODS\MASTERMETHOD2.M
Last changed    : 1/30/2015 2:22:10 PM by Laxman
Analysis Method : C:\CHEM32\1\DATA\LAXMAN\LD-VII-13000001.D\DA.M (MASTERMETHOD2.M)
Last changed    : 2/3/2015 10:01:31 AM by Laxman
Sample Info     : Method-Mastermethod2.M
```

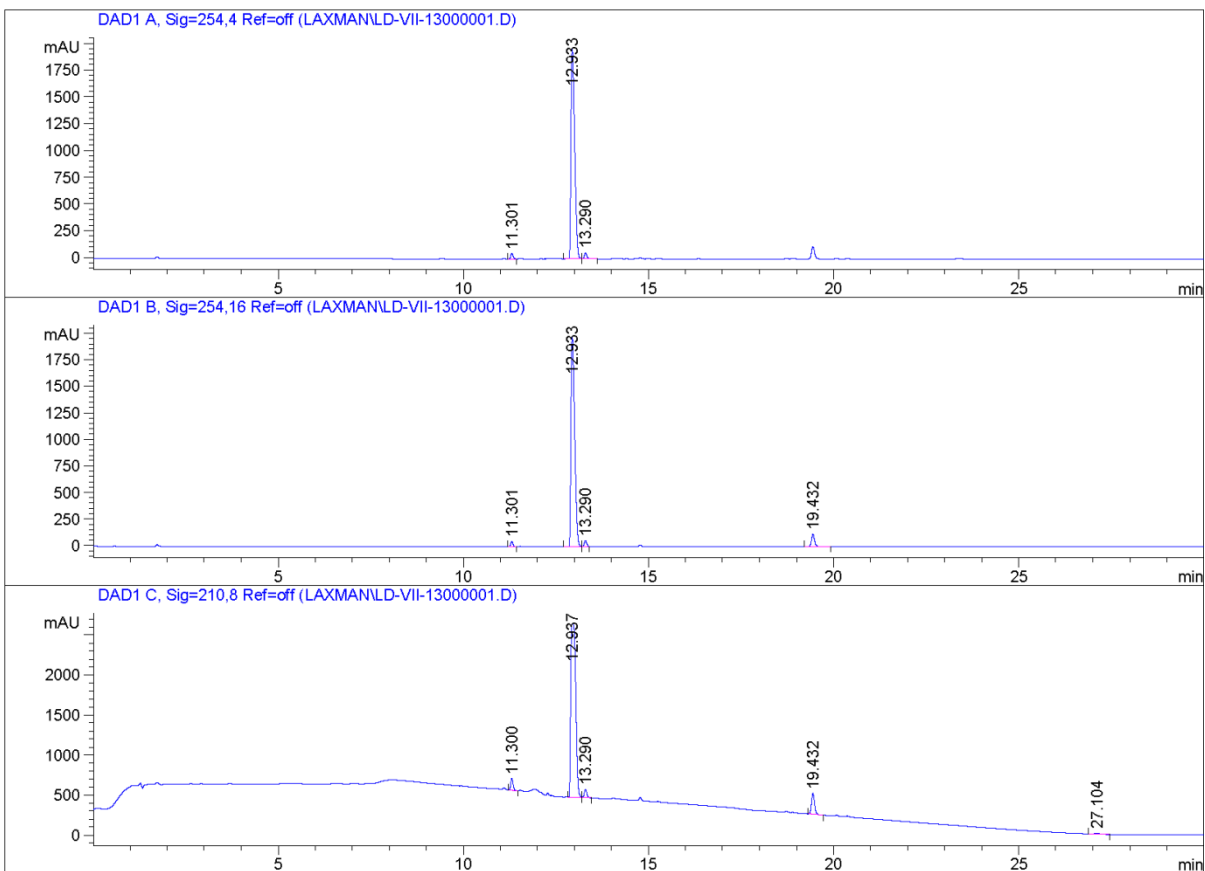

Data File C:\CHEM32\1\DATA\LAXMAN\LD-VII-13000001.D  
Sample Name: LD-VII-13-1A-run1

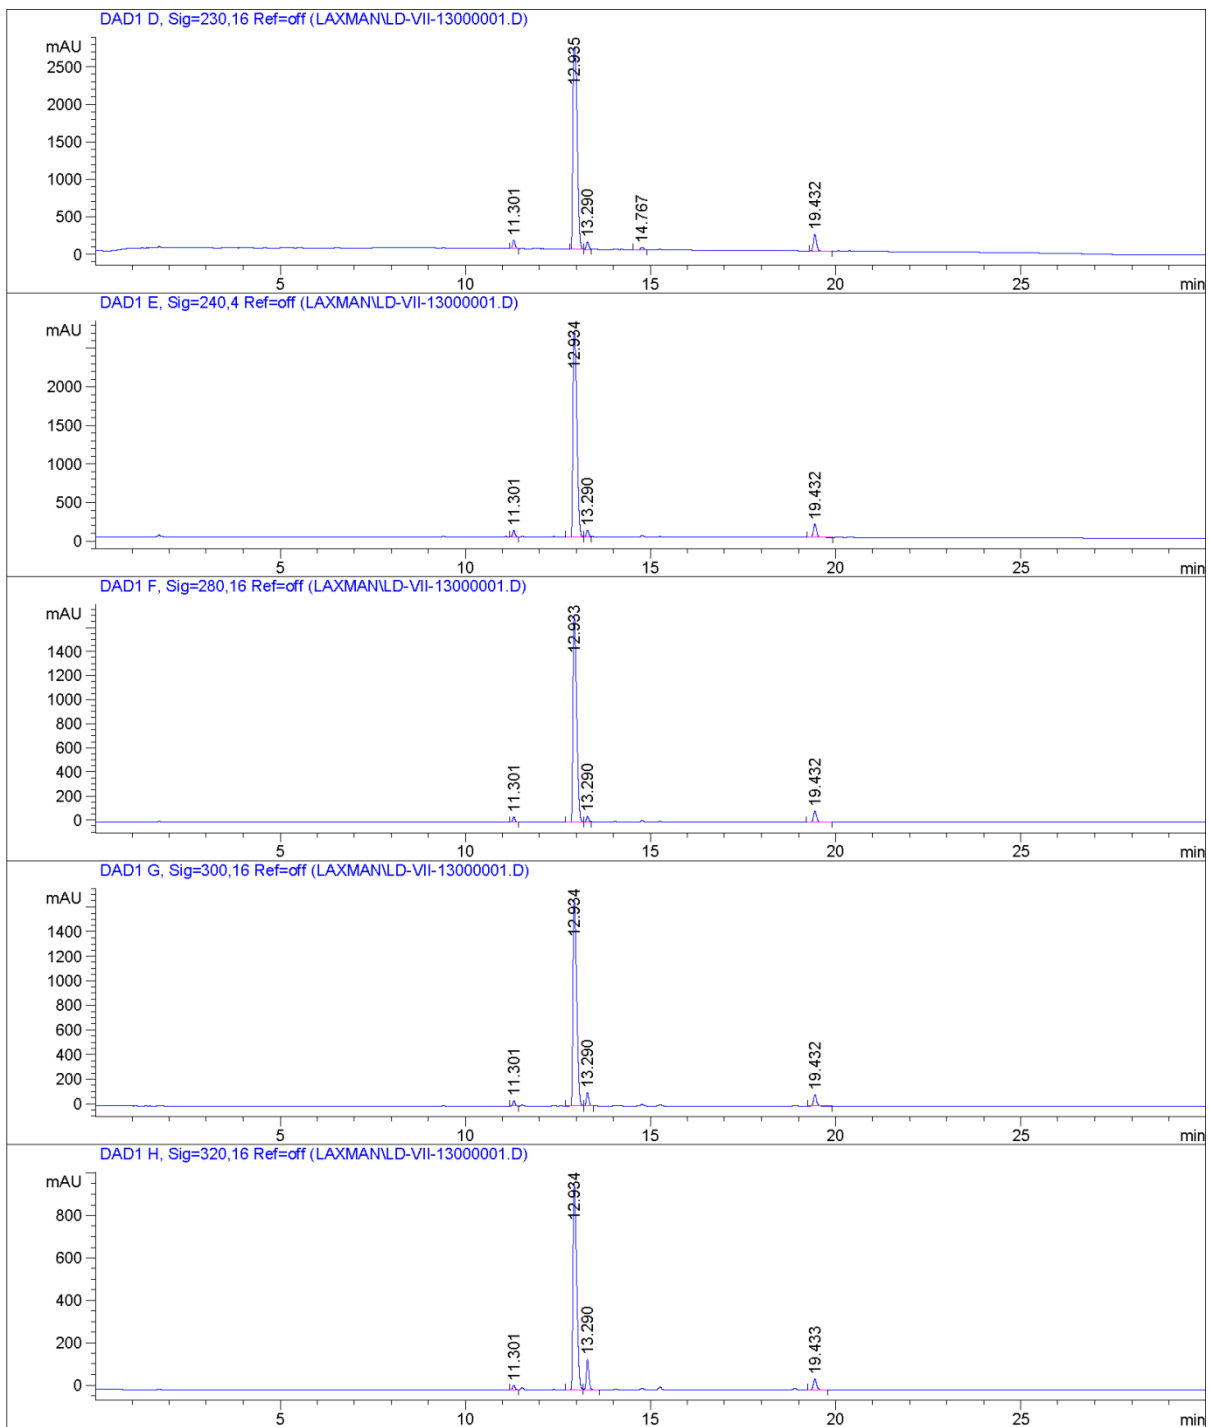

=====  
Area Percent Report  
=====

Sorted By : Signal  
Multiplier : 1.0000  
Dilution : 1.0000  
Use Multiplier & Dilution Factor with ISTDs

Signal 1: DAD1 A, Sig=254,4 Ref=off

| Peak # | RetTime [min] | Type | Width [min] | Area [mAU*s] | Height [mAU] | Area %  |
|--------|---------------|------|-------------|--------------|--------------|---------|
| 1      | 11.301        | VV   | 0.0688      | 216.40208    | 49.69061     | 1.5422  |
| 2      | 12.933        | BV   | 0.1082      | 1.35325e4    | 1968.75415   | 96.4400 |
| 3      | 13.290        | VB   | 0.0767      | 283.14041    | 56.29315     | 2.0178  |

Totals : 1.40320e4 2074.73792

Signal 2: DAD1 B, Sig=254,16 Ref=off

| Peak # | RetTime [min] | Type | Width [min] | Area [mAU*s] | Height [mAU] | Area %  |
|--------|---------------|------|-------------|--------------|--------------|---------|
| 1      | 11.301        | VV   | 0.0688      | 220.70474    | 50.70074     | 1.4896  |
| 2      | 12.933        | BB   | 0.1083      | 1.36721e4    | 1986.53516   | 92.2783 |
| 3      | 13.290        | BV   | 0.0707      | 249.83946    | 55.35923     | 1.6863  |
| 4      | 19.432        | BB   | 0.0870      | 673.50708    | 117.34465    | 4.5458  |

Totals : 1.48161e4 2209.93979

Signal 3: DAD1 C, Sig=210,8 Ref=off

| Peak # | RetTime [min] | Type | Width [min] | Area [mAU*s] | Height [mAU] | Area %  |
|--------|---------------|------|-------------|--------------|--------------|---------|
| 1      | 11.300        | BV   | 0.0709      | 674.63080    | 148.83742    | 2.9450  |
| 2      | 12.937        | VV   | 0.1521      | 2.01127e4    | 2169.80444   | 87.7994 |
| 3      | 13.290        | VB   | 0.0728      | 479.12888    | 102.04993    | 2.0916  |
| 4      | 19.432        | BB   | 0.0865      | 1503.00769   | 263.54004    | 6.5612  |
| 5      | 27.104        | BBA  | 0.2629      | 138.09706    | 8.43884      | 0.6028  |

Totals : 2.29076e4 2692.67067

Data File C:\CHEM32\1\DATA\LAXMAN\LD-VII-13000001.D  
Sample Name: LD-VII-13-1A-run1

Signal 4: DAD1 D, Sig=230,16 Ref=off

| Peak # | RetTime [min] | Type | Width [min] | Area [mAU*s] | Height [mAU] | Area %  |
|--------|---------------|------|-------------|--------------|--------------|---------|
| 1      | 11.301        | VB   | 0.0686      | 494.89111    | 114.18317    | 2.0390  |
| 2      | 12.935        | VV   | 0.1305      | 2.18511e4    | 2696.80225   | 90.0305 |
| 3      | 13.290        | VV   | 0.0733      | 470.43481    | 99.17249     | 1.9383  |
| 4      | 14.767        | BB   | 0.0844      | 173.55266    | 31.42022     | 0.7151  |
| 5      | 19.432        | BB   | 0.0869      | 1280.80042   | 223.38777    | 5.2771  |

Totals : 2.42708e4 3164.96590

Signal 5: DAD1 E, Sig=240,4 Ref=off

| Peak # | RetTime [min] | Type | Width [min] | Area [mAU*s] | Height [mAU] | Area %  |
|--------|---------------|------|-------------|--------------|--------------|---------|
| 1      | 11.301        | VV   | 0.0687      | 374.85321    | 86.20531     | 1.7492  |
| 2      | 12.934        | BB   | 0.1178      | 1.96632e4    | 2673.26465   | 91.7548 |
| 3      | 13.290        | BV   | 0.0707      | 396.78284    | 87.91900     | 1.8515  |
| 4      | 19.432        | BB   | 0.0869      | 995.31000    | 173.60373    | 4.6444  |

Totals : 2.14301e4 3020.99268

Signal 6: DAD1 F, Sig=280,16 Ref=off

| Peak # | RetTime [min] | Type | Width [min] | Area [mAU*s] | Height [mAU] | Area %  |
|--------|---------------|------|-------------|--------------|--------------|---------|
| 1      | 11.301        | VV   | 0.0689      | 198.91370    | 45.63385     | 1.5660  |
| 2      | 12.933        | BB   | 0.1075      | 1.17454e4    | 1722.68103   | 92.4673 |
| 3      | 13.290        | BV   | 0.0707      | 217.02390    | 48.02873     | 1.7085  |
| 4      | 19.432        | BB   | 0.0868      | 540.88361    | 94.40138     | 4.2582  |

Totals : 1.27023e4 1910.74500

Signal 7: DAD1 G, Sig=300,16 Ref=off

| Peak # | RetTime [min] | Type | Width [min] | Area [mAU*s] | Height [mAU] | Area %  |
|--------|---------------|------|-------------|--------------|--------------|---------|
| 1      | 11.301        | VV   | 0.0693      | 190.55530    | 43.33076     | 1.4858  |
| 2      | 12.934        | BV   | 0.1082      | 1.15952e4    | 1687.50012   | 90.4100 |
| 3      | 13.290        | VV   | 0.0725      | 517.15173    | 110.68778    | 4.0323  |
| 4      | 19.432        | BB   | 0.0868      | 522.22614    | 91.22451     | 4.0719  |

Data File C:\CHEM32\1\DATA\LAXMAN\LD-VII-13000001.D  
Sample Name: LD-VII-13-1A-run1

| Peak #   | RetTime [min] | Type | Width [min] | Area [mAU*s] | Height [mAU] | Area % |
|----------|---------------|------|-------------|--------------|--------------|--------|
| Totals : |               |      |             | 1.28252e4    | 1932.74317   |        |

Signal 8: DAD1 H, Sig=320,16 Ref=off

| Peak # | RetTime [min] | Type | Width [min] | Area [mAU*s] | Height [mAU] | Area %  |
|--------|---------------|------|-------------|--------------|--------------|---------|
| 1      | 11.301        | BV   | 0.0690      | 96.04256     | 21.98625     | 1.2361  |
| 2      | 12.934        | BV   | 0.1078      | 6687.89258   | 978.16895    | 86.0774 |
| 3      | 13.290        | VB   | 0.0727      | 684.77283    | 146.05211    | 8.8135  |
| 4      | 19.433        | BB   | 0.0867      | 300.91791    | 52.62127     | 3.8730  |

Totals : 7769.62588 1198.82858

=====  
\*\*\* End of Report \*\*\*

<sup>1</sup>H NMR (CD<sub>3</sub>OD, 600 MHz) Compound **17**

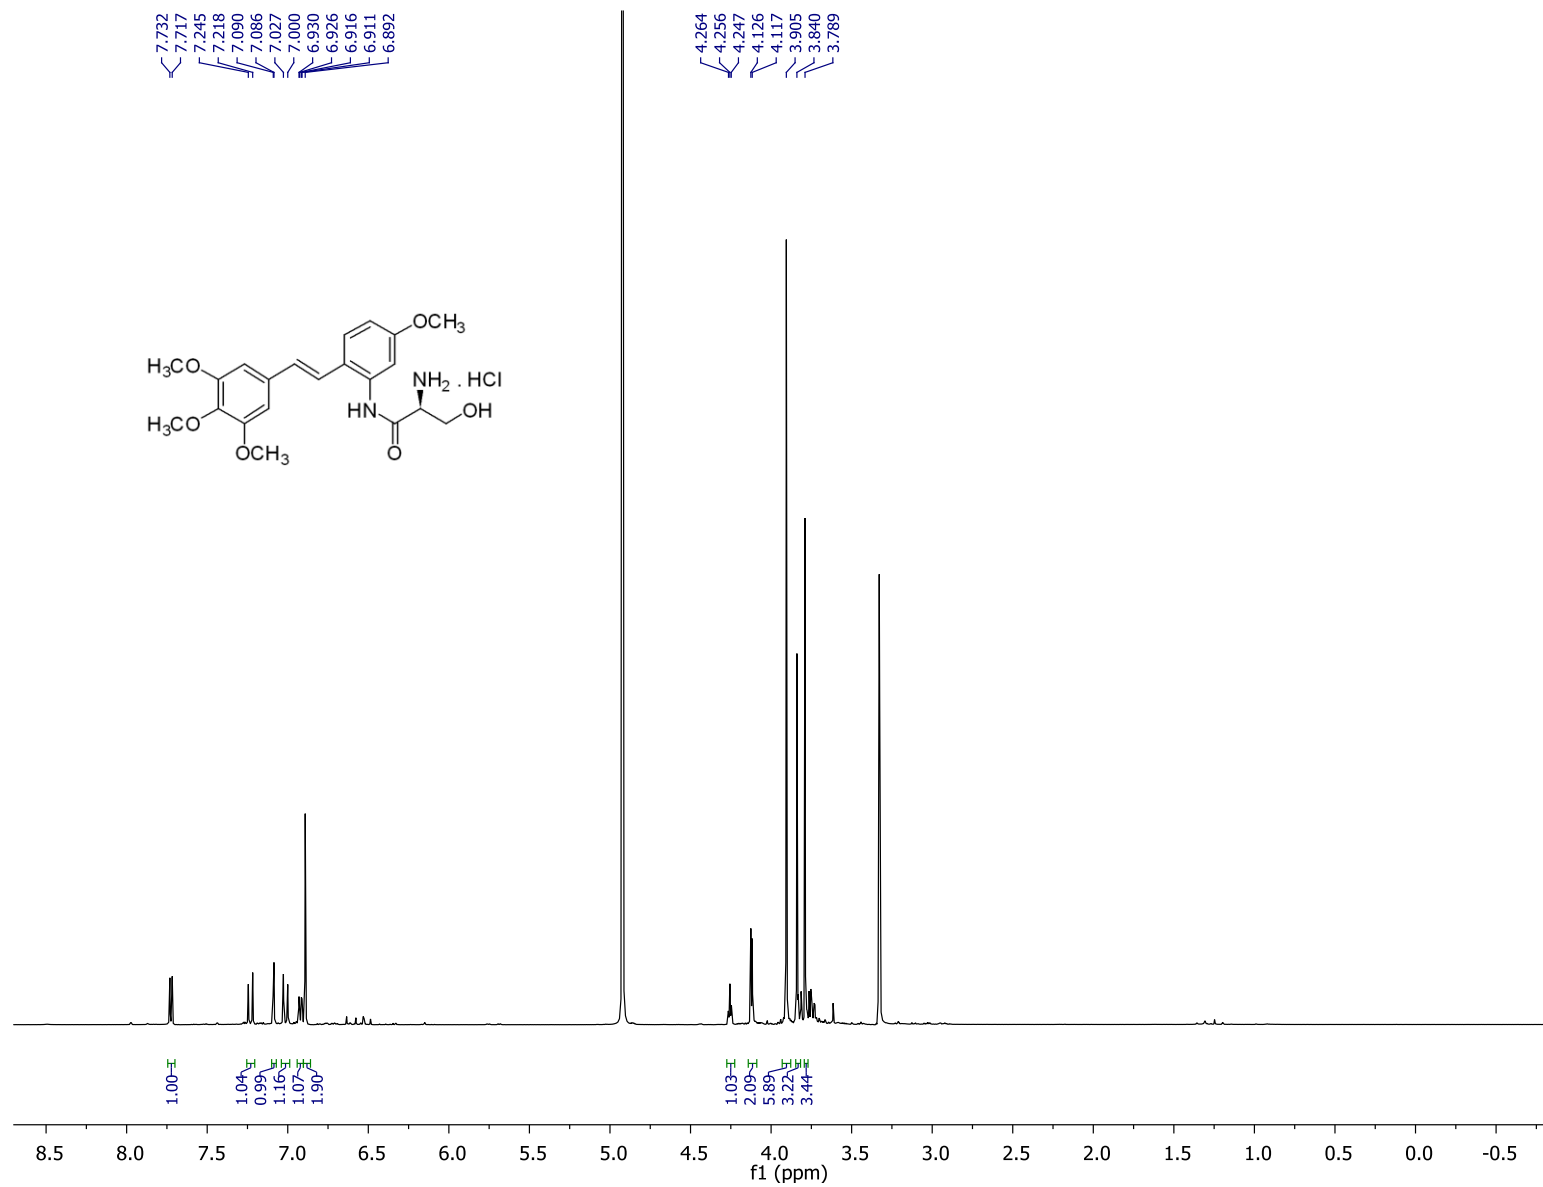

S88



<sup>13</sup>C NMR (CD<sub>3</sub>OD, 150 MHz) Compound **17**

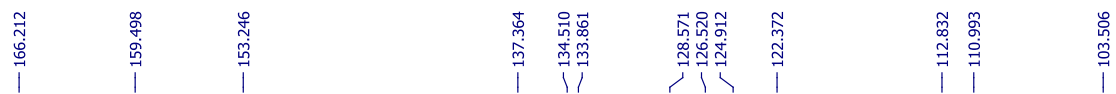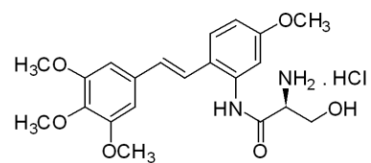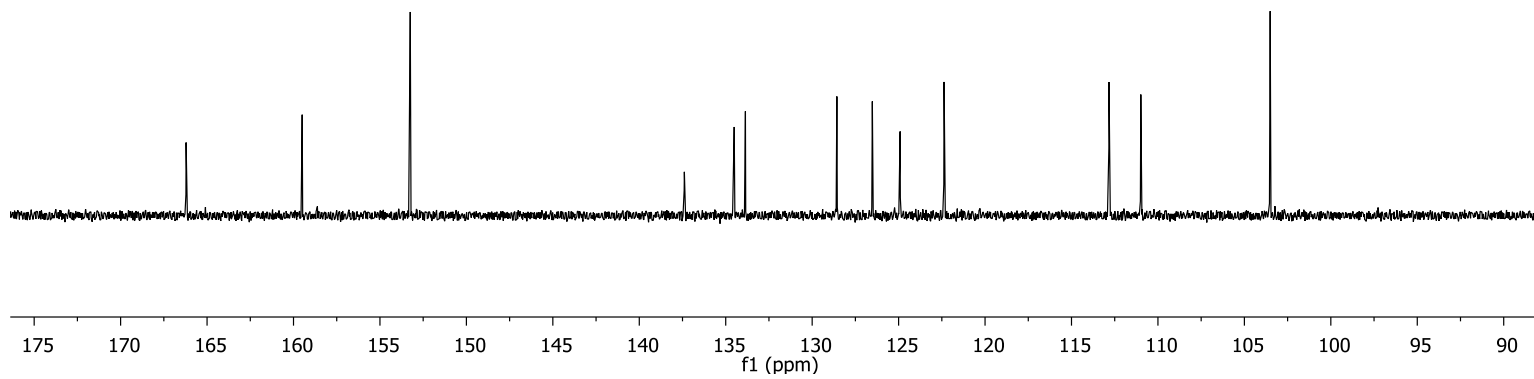

# HRMS Compound 17

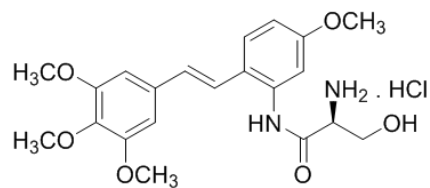

**Chemical Formula: C<sub>21</sub>H<sub>27</sub>ClN<sub>2</sub>O<sub>6</sub>**  
**Exact Mass: 438.1558**

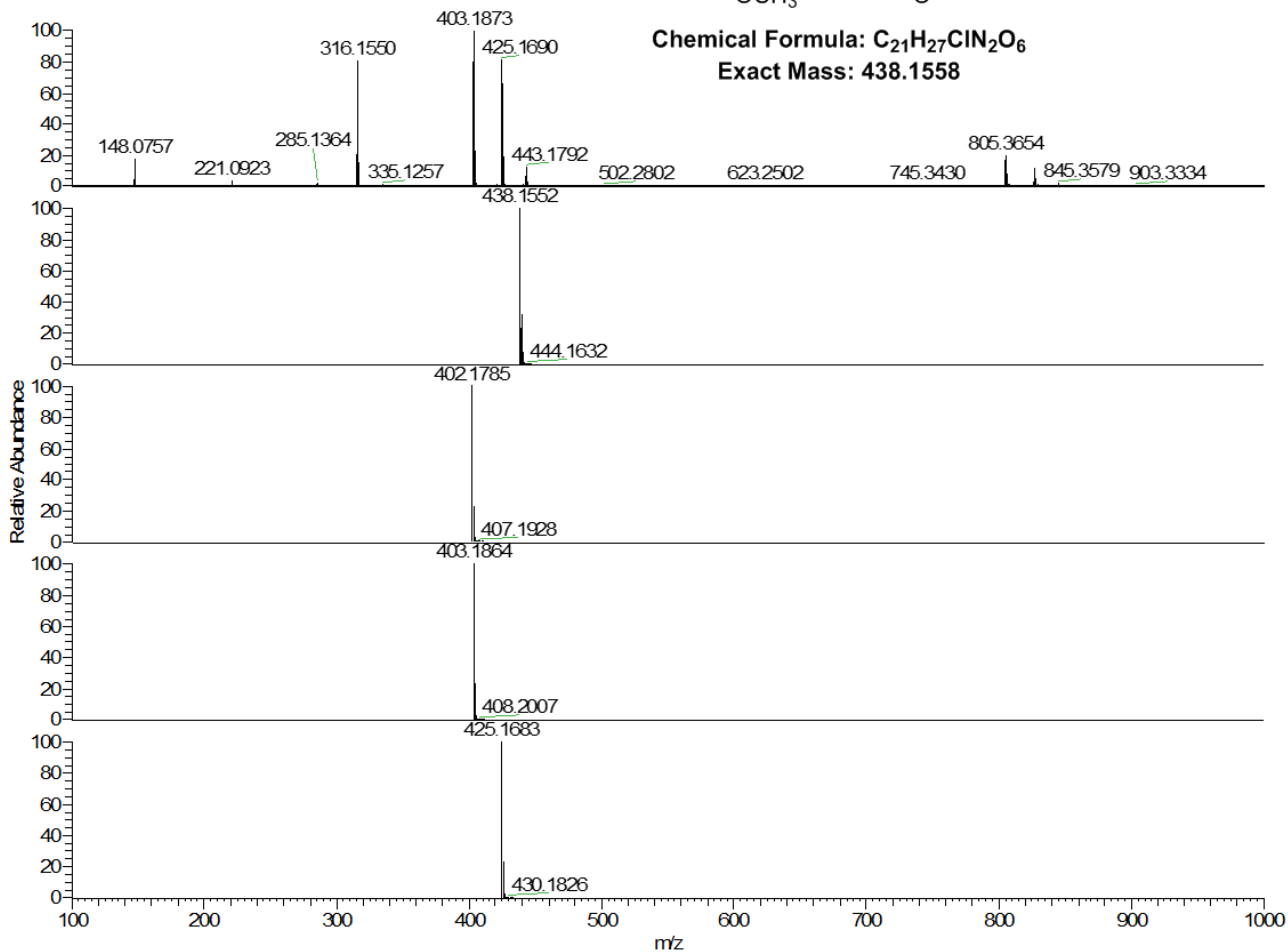

NL:  
 9.08E7  
 LD-V-137-1A-Run\_Orbi\_+  
 ES#1 RT: 0.01 AV: 1 T:  
 FTMS + p ESI Full ms  
 [100.00-1000.00]

NL:  
 5.90E5  
 C<sub>21</sub>H<sub>27</sub>ClN<sub>2</sub>O<sub>6</sub>:  
 C<sub>21</sub>H<sub>27</sub>Cl<sub>1</sub>N<sub>2</sub>O<sub>6</sub>  
 pa Chrg 1

NL:  
 7.78E5  
 C<sub>21</sub>H<sub>25</sub>N<sub>2</sub>O<sub>6</sub>+H:  
 C<sub>21</sub>H<sub>26</sub>N<sub>2</sub>O<sub>6</sub>  
 pa Chrg 1

NL:  
 7.78E5  
 C<sub>21</sub>H<sub>26</sub>N<sub>2</sub>O<sub>6</sub>+H:  
 C<sub>21</sub>H<sub>27</sub>N<sub>2</sub>O<sub>6</sub>  
 pa Chrg 1

NL:  
 7.78E5  
 C<sub>21</sub>H<sub>26</sub>N<sub>2</sub>O<sub>6</sub>+Na:  
 C<sub>21</sub>H<sub>26</sub>N<sub>2</sub>O<sub>6</sub>Na<sub>1</sub>  
 pa Chrg 1

# HPLC for Compound 17

Data File C:\CHEM32\1\DATA\LAXMAN\LD-V137-2RUN001.D

Sample Name: LD-V-137-2-run1

=====  
Acq. Operator : Laxman  
Acq. Instrument : Instrument 1 Location : -  
Injection Date : 7/14/2014 10:03:32 PM  
Acq. Method : C:\CHEM32\1\METHODS\MASTERMETHOD2.M  
Last changed : 7/14/2014 9:54:41 PM by Laxman  
Analysis Method : C:\CHEM32\1\DATA\LAXMAN\LD-V137-2RUN001.D\DA.M (MASTERMETHOD2.M)  
Last changed : 7/14/2014 10:43:46 PM by Laxman  
Sample Info : Mastermethod2  
0-5 min 10:90 ACN: 0.1% TFA in Water  
5-25 min 10:90 to 100:0 ACN: 0.1% TFA in Water  
25-30 min 100:0 ACN: 0.1% TFA in Water

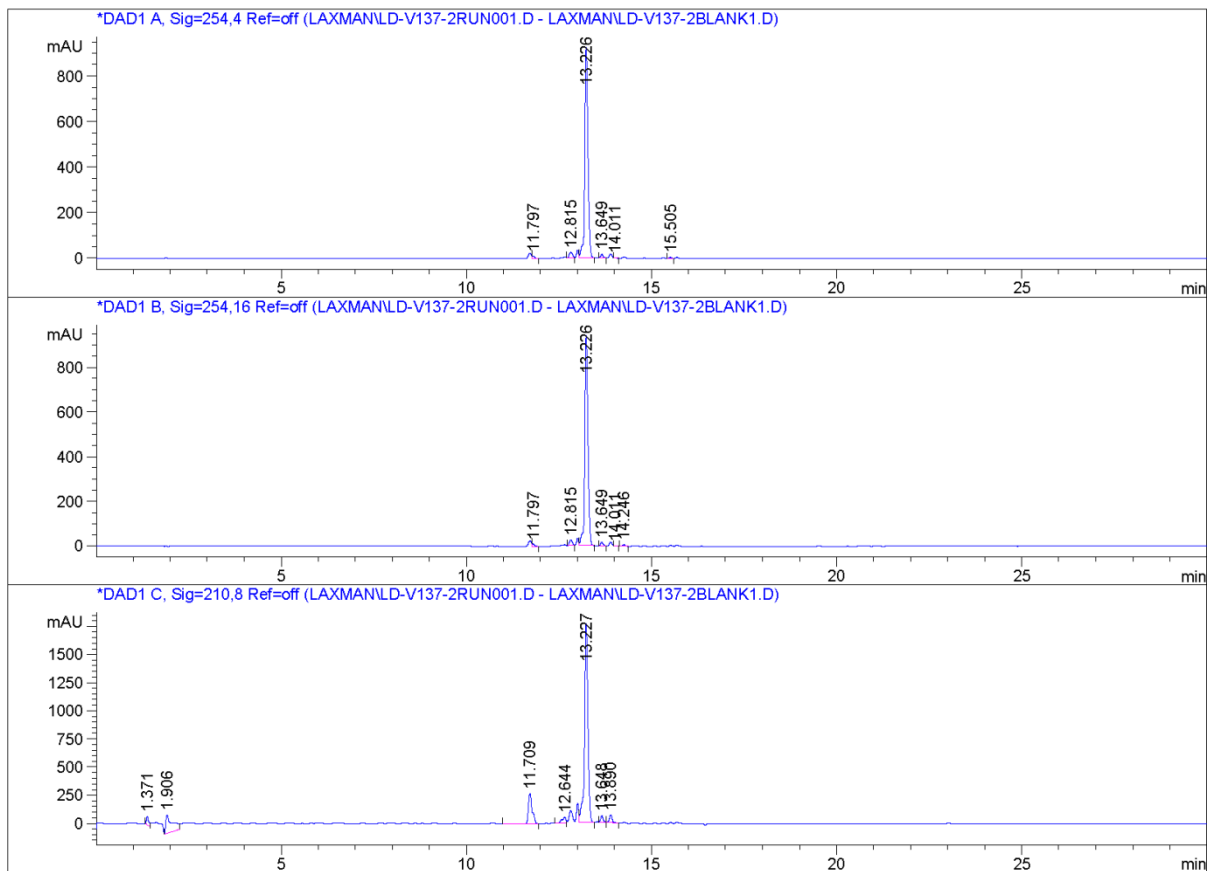

Data File C:\CHEM32\1\DATA\LAXMAN\LD-V137-2RUN001.D  
Sample Name: LD-V-137-2-run1

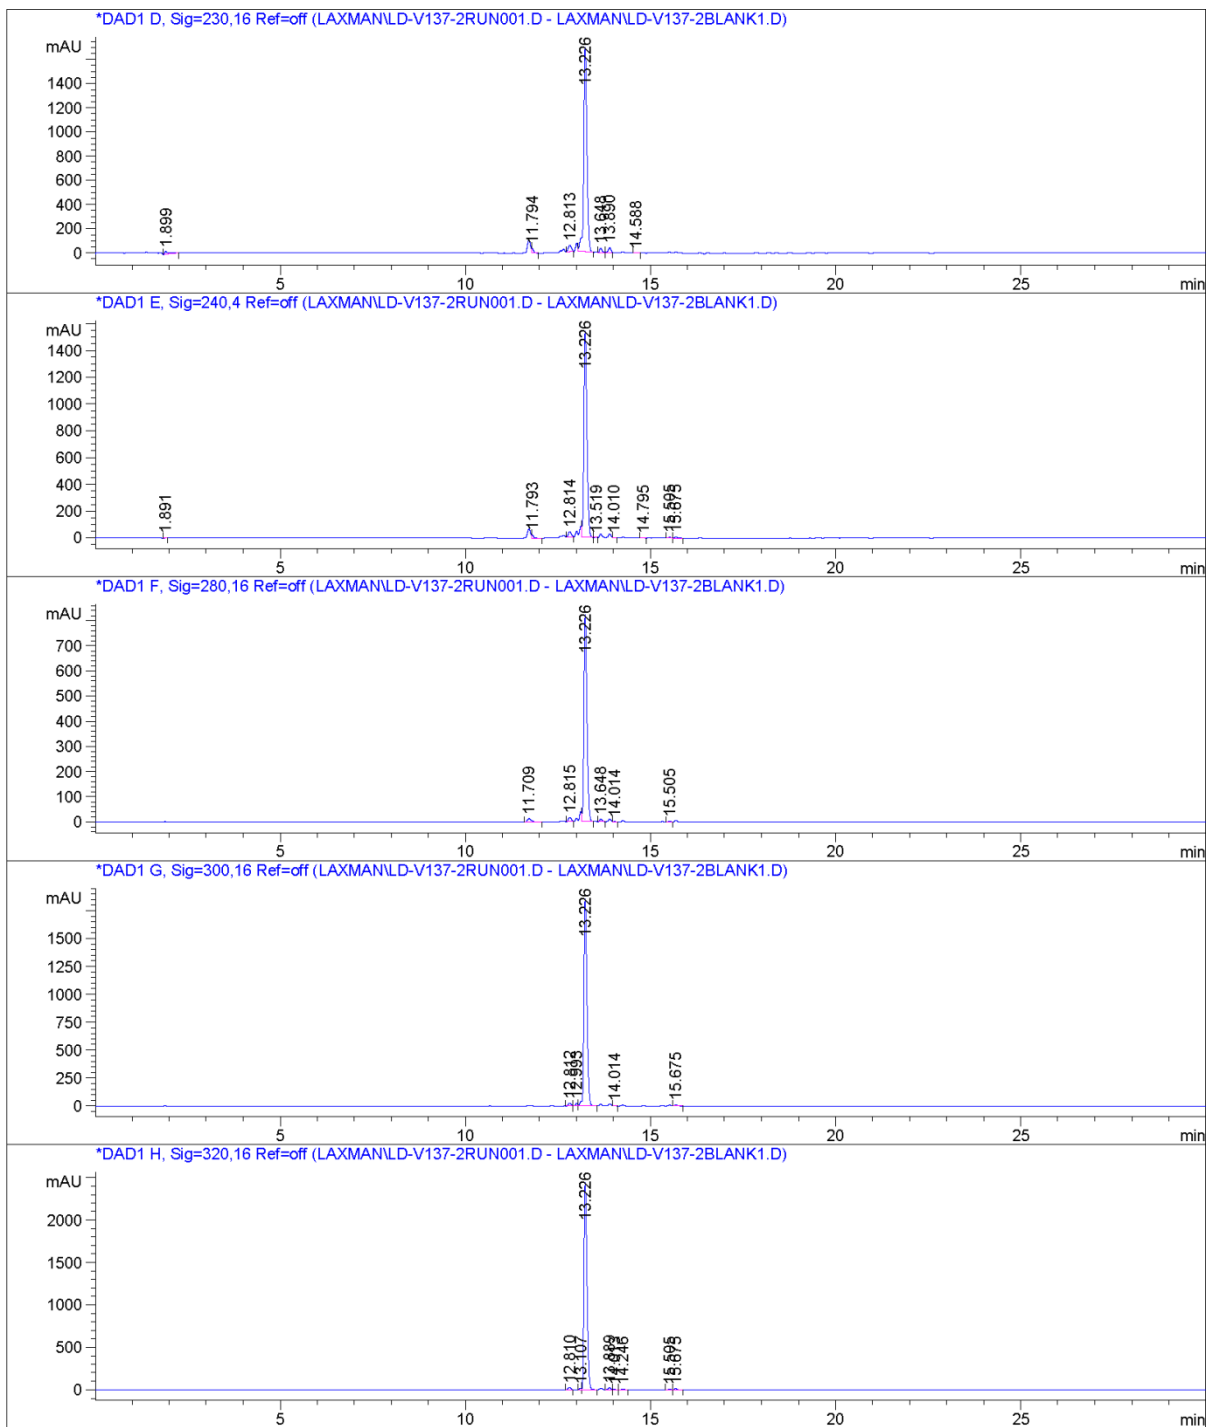

=====  
Area Percent Report  
=====

Sorted By : Signal  
Multiplier : 1.0000  
Dilution : 1.0000  
Use Multiplier & Dilution Factor with ISTDs

Signal 1: DAD1 A, Sig=254,4 Ref=off  
Signal has been modified after loading from rawdata file!

| Peak # | RetTime [min] | Type | Width [min] | Area [mAU*s] | Height [mAU] | Area %  |
|--------|---------------|------|-------------|--------------|--------------|---------|
| 1      | 11.797        | VB   | 0.0571      | 37.39809     | 10.12354     | 0.6524  |
| 2      | 12.815        | BB   | 0.0943      | 141.96701    | 24.23329     | 2.4765  |
| 3      | 13.226        | VB   | 0.0908      | 5449.38037   | 924.33972    | 95.0589 |
| 4      | 13.649        | BB   | 0.0717      | 75.91022     | 16.47810     | 1.3242  |
| 5      | 14.011        | VB   | 0.0582      | 5.78434      | 1.52517      | 0.1009  |
| 6      | 15.505        | BV   | 0.0677      | 22.19742     | 5.01273      | 0.3872  |

Totals : 5732.63745 981.71255

Signal 2: DAD1 B, Sig=254,16 Ref=off  
Signal has been modified after loading from rawdata file!

| Peak # | RetTime [min] | Type | Width [min] | Area [mAU*s] | Height [mAU] | Area %  |
|--------|---------------|------|-------------|--------------|--------------|---------|
| 1      | 11.797        | VB   | 0.0543      | 37.51292     | 10.34681     | 0.6424  |
| 2      | 12.815        | BB   | 0.0946      | 141.00084    | 23.99567     | 2.4146  |
| 3      | 13.226        | VB   | 0.0907      | 5548.84961   | 942.08569    | 95.0223 |
| 4      | 13.649        | BB   | 0.0717      | 74.49856     | 16.18236     | 1.2758  |
| 5      | 14.011        | VB   | 0.0583      | 5.93264      | 1.56384      | 0.1016  |
| 6      | 14.246        | BB   | 0.0727      | 31.73079     | 6.76175      | 0.5434  |

Totals : 5839.52536 1000.93613

Signal 3: DAD1 C, Sig=210,8 Ref=off  
Signal has been modified after loading from rawdata file!

| Peak # | RetTime [min] | Type | Width [min] | Area [mAU*s] | Height [mAU] | Area %  |
|--------|---------------|------|-------------|--------------|--------------|---------|
| 1      | 1.371         | BV   | 0.0676      | 340.71149    | 74.14693     | 2.0426  |
| 2      | 1.906         | BV   | 0.1686      | 2097.38916   | 164.71938    | 12.5738 |
| 3      | 11.709        | BB   | 0.1048      | 1859.09814   | 268.37698    | 11.1453 |

Data File C:\CHEM32\1\DATA\LAXMAN\LD-V137-2RUN001.D  
Sample Name: LD-V-137-2-run1

| Peak # | RetTime [min] | Type | Width [min] | Area [mAU*s] | Height [mAU] | Area %  |
|--------|---------------|------|-------------|--------------|--------------|---------|
| 4      | 12.644        | BV   | 0.1103      | 423.80072    | 53.58047     | 2.5407  |
| 5      | 13.227        | VB   | 0.0960      | 1.12451e4    | 1772.58142   | 67.4141 |
| 6      | 13.648        | VV   | 0.0770      | 315.91071    | 62.49385     | 1.8939  |
| 7      | 13.890        | VB   | 0.0834      | 398.60931    | 73.31020     | 2.3897  |

Totals : 1.66806e4 2469.20923

Signal 4: DAD1 D, Sig=230,16 Ref=off  
Signal has been modified after loading from rawdata file!

| Peak # | RetTime [min] | Type | Width [min] | Area [mAU*s] | Height [mAU] | Area %  |
|--------|---------------|------|-------------|--------------|--------------|---------|
| 1      | 1.899         | BB   | 0.1205      | 206.66499    | 23.52119     | 1.8437  |
| 2      | 11.794        | VB   | 0.0507      | 132.52130    | 39.94218     | 1.1822  |
| 3      | 12.813        | BB   | 0.0956      | 323.16006    | 54.13917     | 2.8830  |
| 4      | 13.226        | VB   | 0.0918      | 1.01466e4    | 1696.98718   | 90.5198 |
| 5      | 13.648        | VV   | 0.0736      | 178.25475    | 37.39213     | 1.5902  |
| 6      | 13.890        | VV   | 0.0767      | 213.33083    | 42.40094     | 1.9032  |
| 7      | 14.588        | VV   | 0.1051      | 8.73081      | 1.28800      | 0.0779  |

Totals : 1.12093e4 1895.67081

Signal 5: DAD1 E, Sig=240,4 Ref=off  
Signal has been modified after loading from rawdata file!

| Peak # | RetTime [min] | Type | Width [min] | Area [mAU*s] | Height [mAU] | Area %  |
|--------|---------------|------|-------------|--------------|--------------|---------|
| 1      | 1.891         | BB   | 0.0504      | 19.58302     | 6.28240      | 0.2135  |
| 2      | 11.793        | VB   | 0.0534      | 76.00732     | 23.73110     | 0.8287  |
| 3      | 12.814        | BB   | 0.0957      | 236.46078    | 39.57375     | 2.5782  |
| 4      | 13.226        | VB   | 0.0880      | 8730.77148   | 1542.62524   | 95.1954 |
| 5      | 13.519        | BV   | 0.0590      | 6.40798      | 1.82516      | 0.0699  |
| 6      | 14.010        | VB   | 0.0571      | 10.10926     | 2.73744      | 0.1102  |
| 7      | 14.795        | VB   | 0.0677      | 9.97771      | 2.34226      | 0.1088  |
| 8      | 15.505        | VV   | 0.0689      | 35.71164     | 7.87916      | 0.3894  |
| 9      | 15.675        | VB   | 0.0800      | 46.39381     | 8.72317      | 0.5059  |

Totals : 9171.42301 1635.71969

Data File C:\CHEM32\1\DATA\LAXMAN\LD-V137-2RUN001.D  
Sample Name: LD-V-137-2-run1

Signal 6: DAD1 F, Sig=280,16 Ref=off  
Signal has been modified after loading from rawdata file!

| Peak # | RetTime [min] | Type | Width [min] | Area [mAU*s] | Height [mAU] | Area %  |
|--------|---------------|------|-------------|--------------|--------------|---------|
| 1      | 11.709        | BB   | 0.1042      | 97.78605     | 14.22911     | 2.0067  |
| 2      | 12.815        | BB   | 0.0938      | 97.29163     | 16.73797     | 1.9965  |
| 3      | 13.226        | VB   | 0.0873      | 4604.29199   | 823.04236    | 94.4843 |
| 4      | 13.648        | BB   | 0.0710      | 46.71126     | 10.28558     | 0.9586  |
| 5      | 14.014        | VB   | 0.0629      | 6.04078      | 1.50296      | 0.1240  |
| 6      | 15.505        | VV   | 0.0699      | 20.95428     | 4.53886      | 0.4300  |

Totals : 4873.07599 870.33683

Signal 7: DAD1 G, Sig=300,16 Ref=off  
Signal has been modified after loading from rawdata file!

| Peak # | RetTime [min] | Type | Width [min] | Area [mAU*s] | Height [mAU] | Area %  |
|--------|---------------|------|-------------|--------------|--------------|---------|
| 1      | 12.812        | BB   | 0.0888      | 138.41168    | 25.71216     | 1.2652  |
| 2      | 12.993        | BV   | 0.0620      | 88.38454     | 22.39664     | 0.8079  |
| 3      | 13.226        | VB   | 0.0887      | 1.06324e4    | 1859.13770   | 97.1902 |
| 4      | 14.014        | VB   | 0.0646      | 15.00118     | 3.60392      | 0.1371  |
| 5      | 15.675        | VB   | 0.0780      | 65.59080     | 12.75470     | 0.5996  |

Totals : 1.09398e4 1923.60512

Signal 8: DAD1 H, Sig=320,16 Ref=off  
Signal has been modified after loading from rawdata file!

| Peak # | RetTime [min] | Type | Width [min] | Area [mAU*s] | Height [mAU] | Area %  |
|--------|---------------|------|-------------|--------------|--------------|---------|
| 1      | 12.810        | BB   | 0.0877      | 154.40775    | 29.18997     | 1.0733  |
| 2      | 13.107        | BV   | 0.0546      | 66.88392     | 19.22609     | 0.4649  |
| 3      | 13.226        | VB   | 0.0901      | 1.38478e4    | 2443.69946   | 96.2531 |
| 4      | 13.889        | BV   | 0.0742      | 109.93297    | 22.84040     | 0.7641  |
| 5      | 14.013        | VB   | 0.0647      | 19.88695     | 4.76055      | 0.1382  |
| 6      | 14.246        | BB   | 0.0723      | 54.22525     | 11.65682     | 0.3769  |
| 7      | 15.505        | VV   | 0.0698      | 57.71371     | 12.52080     | 0.4012  |
| 8      | 15.675        | VB   | 0.0779      | 76.01604     | 14.81508     | 0.5284  |

Totals : 1.43869e4 2558.70918

=====

<sup>1</sup>H NMR (CD<sub>3</sub>OD, 500 MHz) Compound **18**

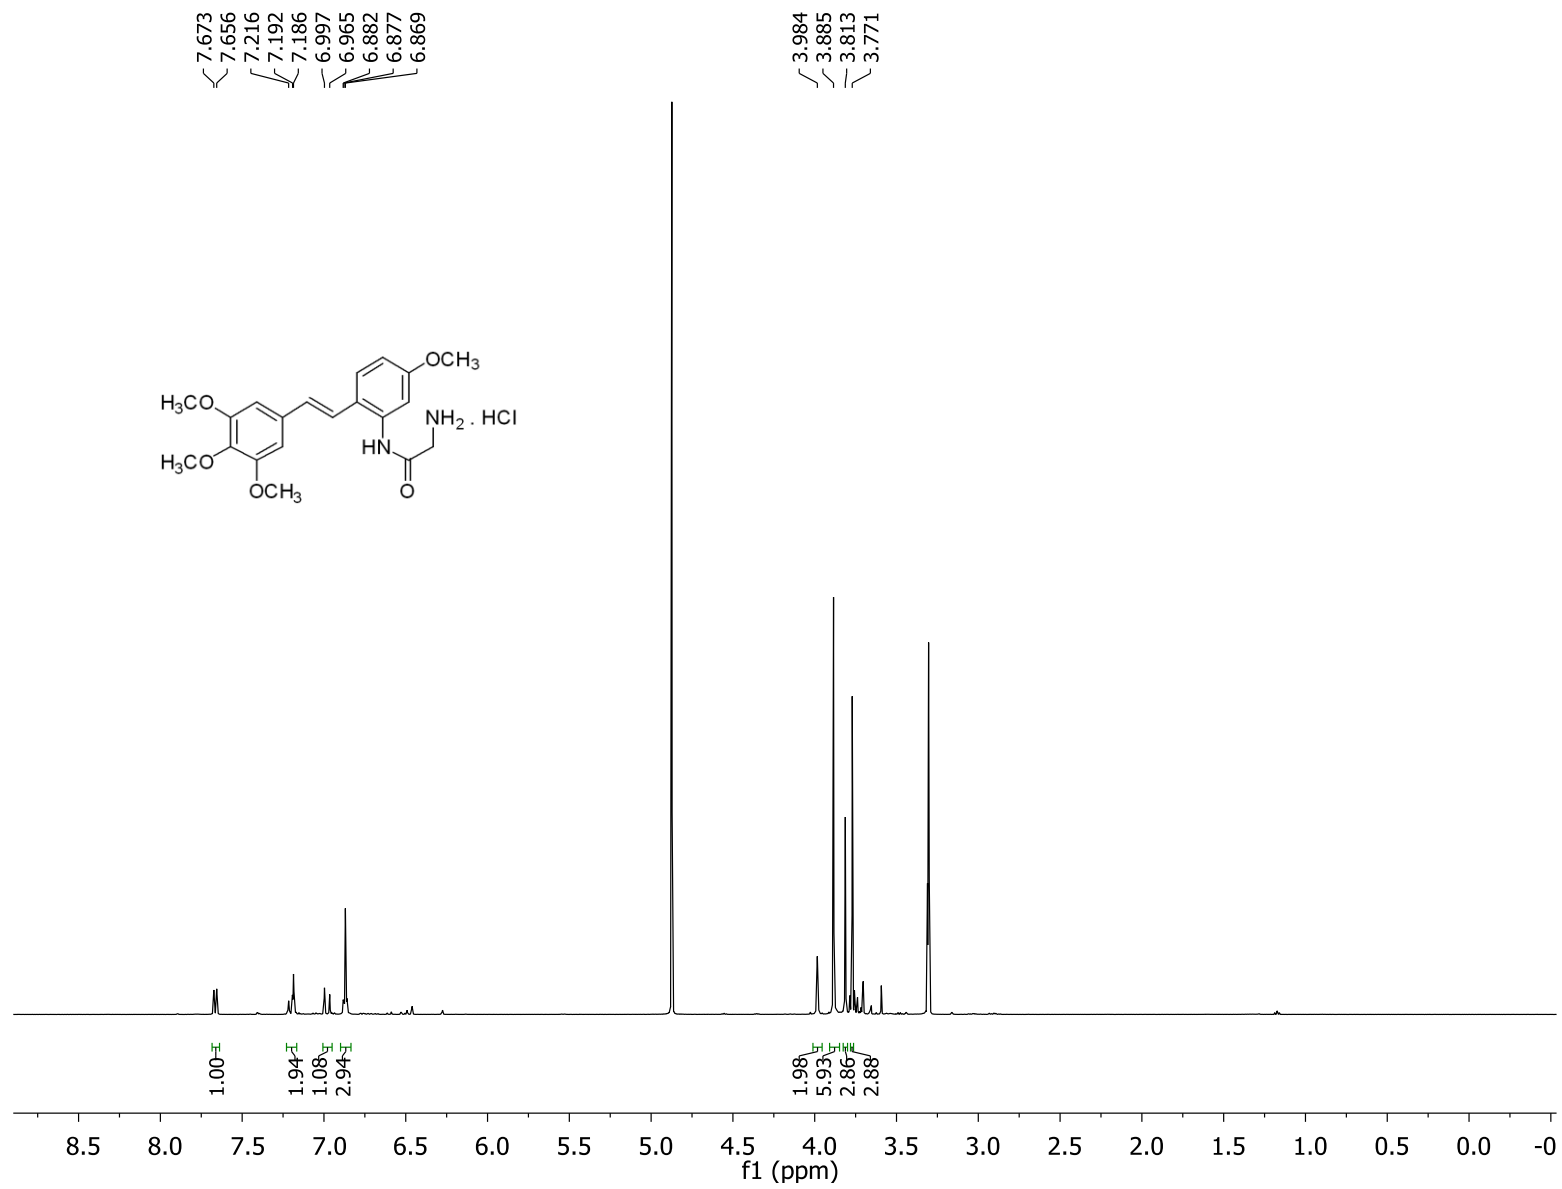



<sup>13</sup>C NMR (CD<sub>3</sub>OD, 125 MHz) Compound **18**

165.037  
159.471  
153.249

137.576  
134.586  
133.833  
129.041  
126.754  
124.235  
122.216

112.346  
110.476  
103.754

59.756  
55.305  
54.460

40.655

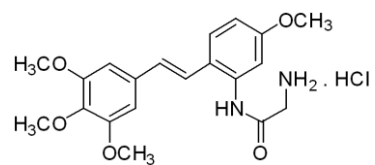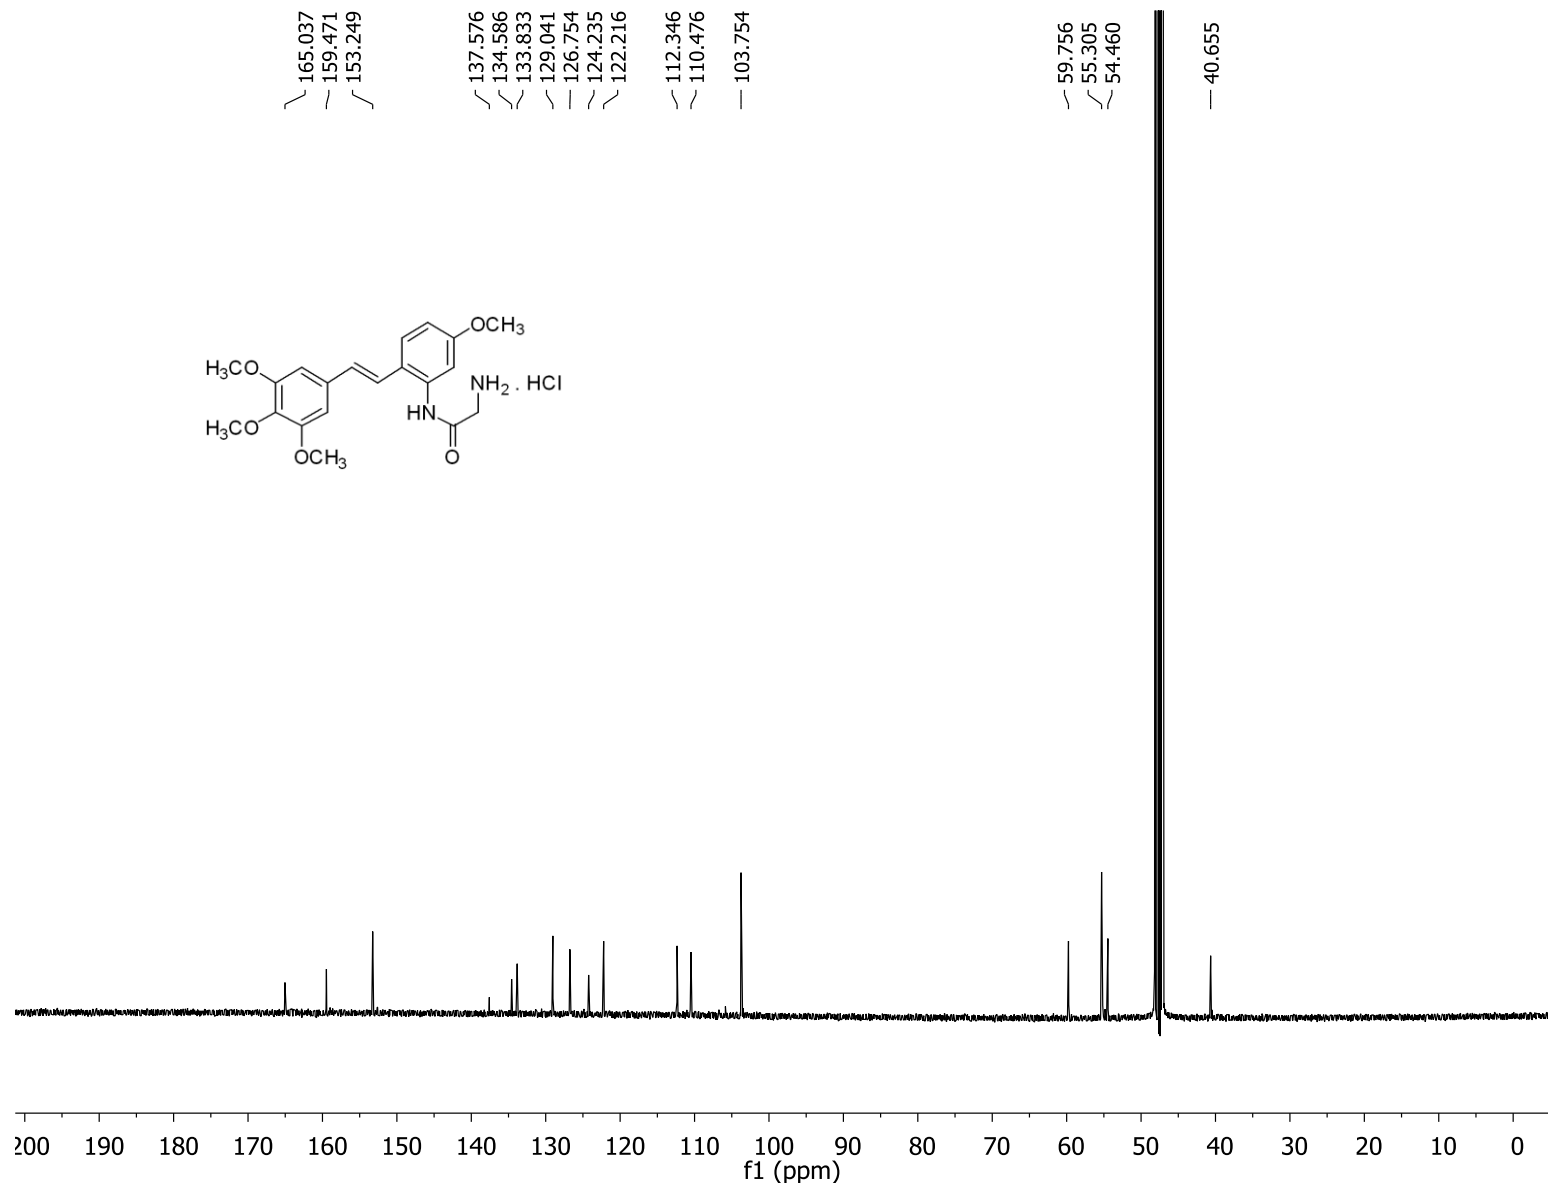

# HRMS Compound 18

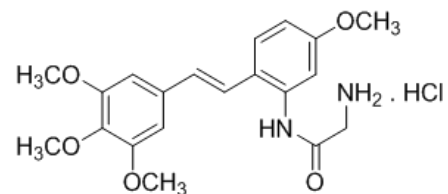

**Chemical Formula: C<sub>20</sub>H<sub>25</sub>ClN<sub>2</sub>O<sub>5</sub>**  
**Exact Mass: 408.1452**

NL:  
 9.72E7  
 LD-V-139-1-run1\_Orbi\_+  
 ES#1 RT: 0.01 AV: 1 T:  
 FTMS + p ESI Full ms  
 [100.00-700.00]

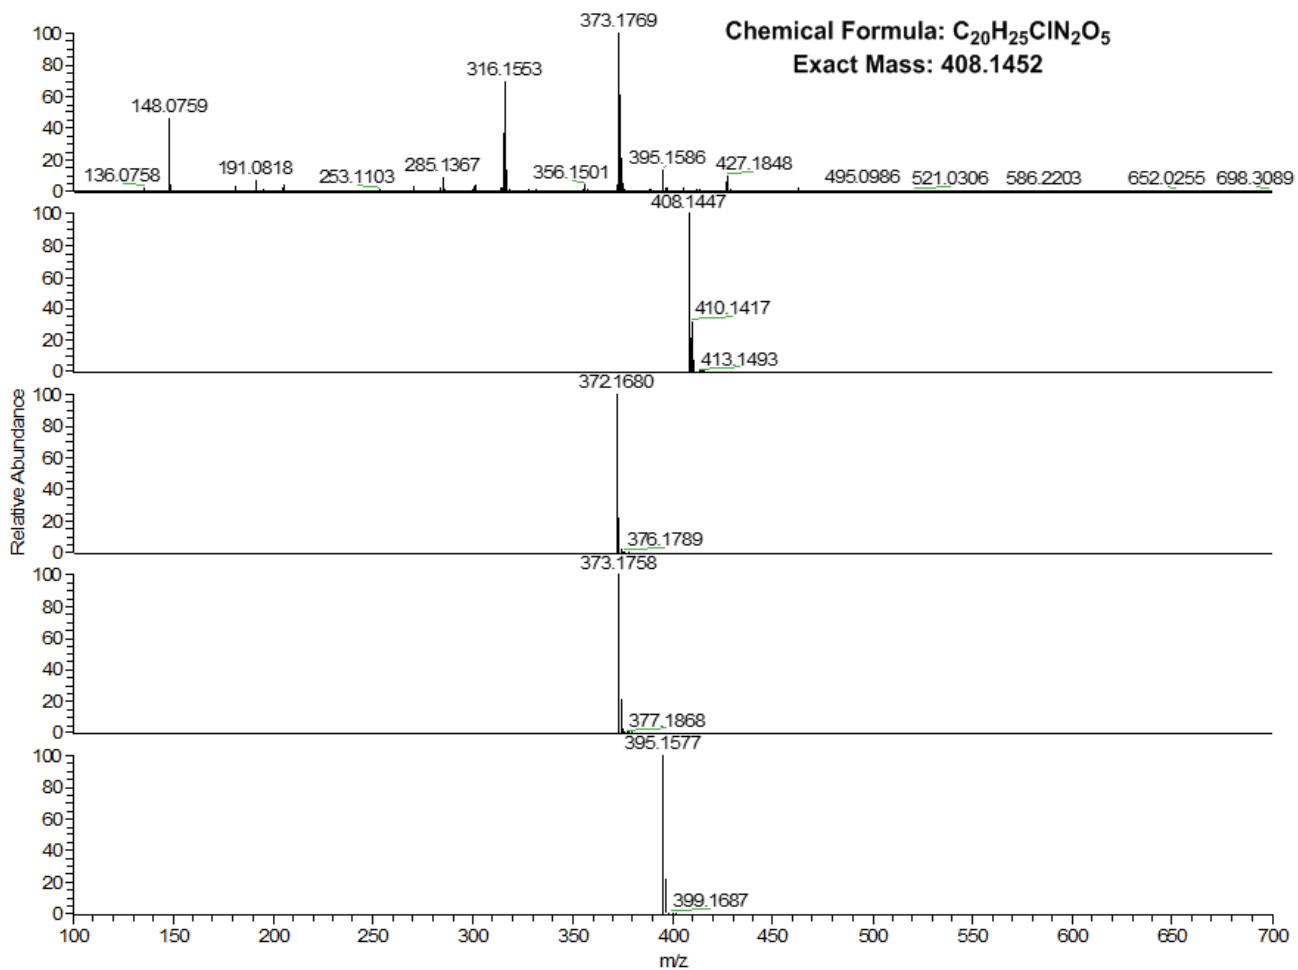

NL:  
 5.98E5  
 C<sub>20</sub> H<sub>25</sub> ClN<sub>2</sub> O<sub>5</sub>  
 C<sub>20</sub> H<sub>25</sub> Cl<sub>1</sub> N<sub>2</sub> O<sub>5</sub>  
 pa Chrg 1

NL:  
 7.89E5  
 C<sub>20</sub> H<sub>24</sub> N<sub>2</sub> O<sub>5</sub>  
 C<sub>20</sub> H<sub>24</sub> N<sub>2</sub> O<sub>5</sub>  
 pa Chrg 1

NL:  
 7.89E5  
 C<sub>20</sub> H<sub>24</sub> N<sub>2</sub> O<sub>5</sub> +H  
 C<sub>20</sub> H<sub>25</sub> N<sub>2</sub> O<sub>5</sub>  
 pa Chrg 1

NL:  
 7.89E5  
 C<sub>20</sub> H<sub>24</sub> N<sub>2</sub> O<sub>5</sub> +Na  
 C<sub>20</sub> H<sub>24</sub> N<sub>2</sub> O<sub>5</sub> Na<sub>1</sub>  
 pa Chrg 1

# HPLC for Compound 18

Data File C:\CHEM32\1\DATA\LAXMAN\LD-V-139-2RUN01.D

Sample Name: LD-V-139-2run1

```
=====
Acq. Operator   : Laxman
Acq. Instrument : Instrument 1                      Location : -
Injection Date  : 7/13/2014 12:11:09 PM
Acq. Method     : C:\CHEM32\1\METHODS\MASTERMETHOD.M
Last changed    : 7/13/2014 12:04:39 PM by Laxman
Analysis Method : C:\CHEM32\1\DATA\LAXMAN\LD-V-139-2RUN01.D\DA.M (MASTERMETHOD.M)
Last changed    : 7/13/2014 1:05:46 PM by Laxman
Sample Info     : Method
                  Mastermethod.M
```

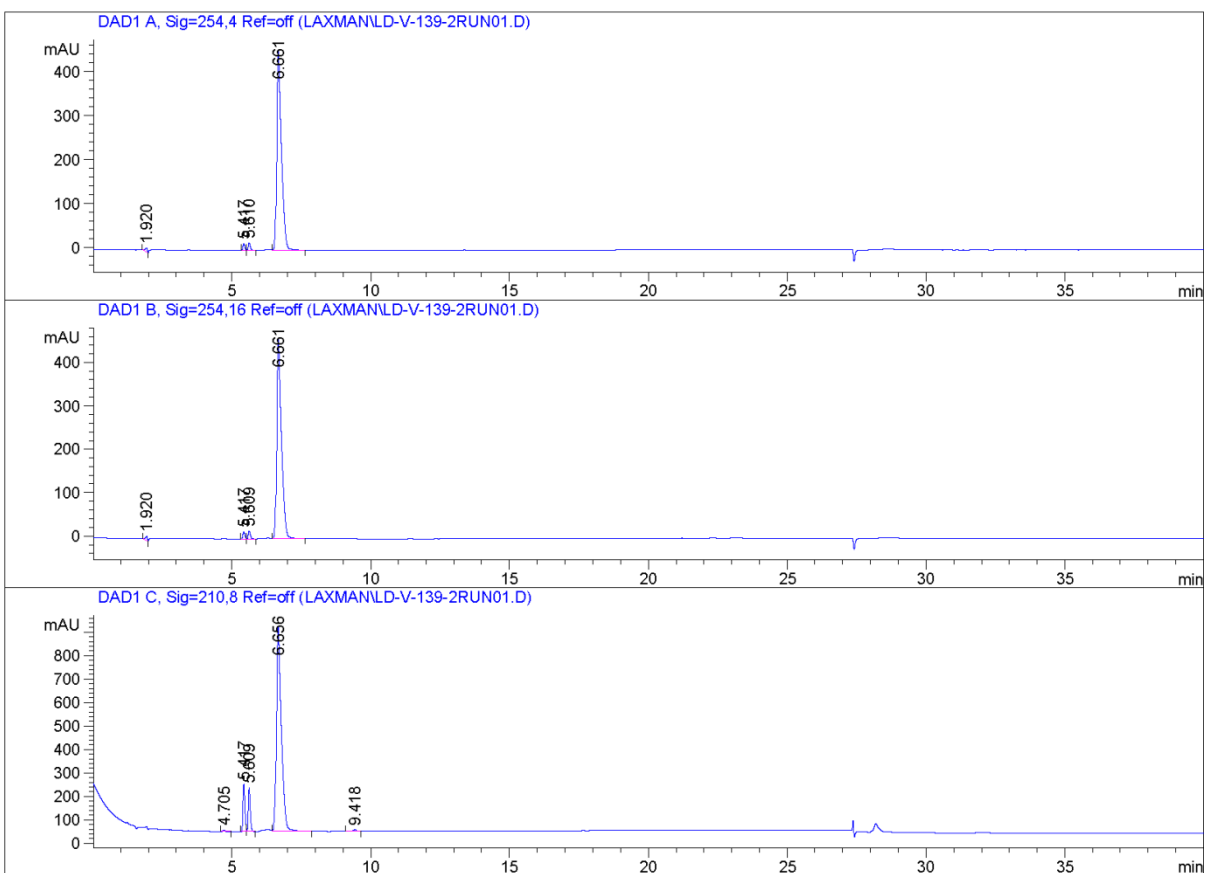

Data File C:\CHEM32\1\DATA\LAXMAN\LD-V-139-2RUN01.D  
Sample Name: LD-V-139-2run1

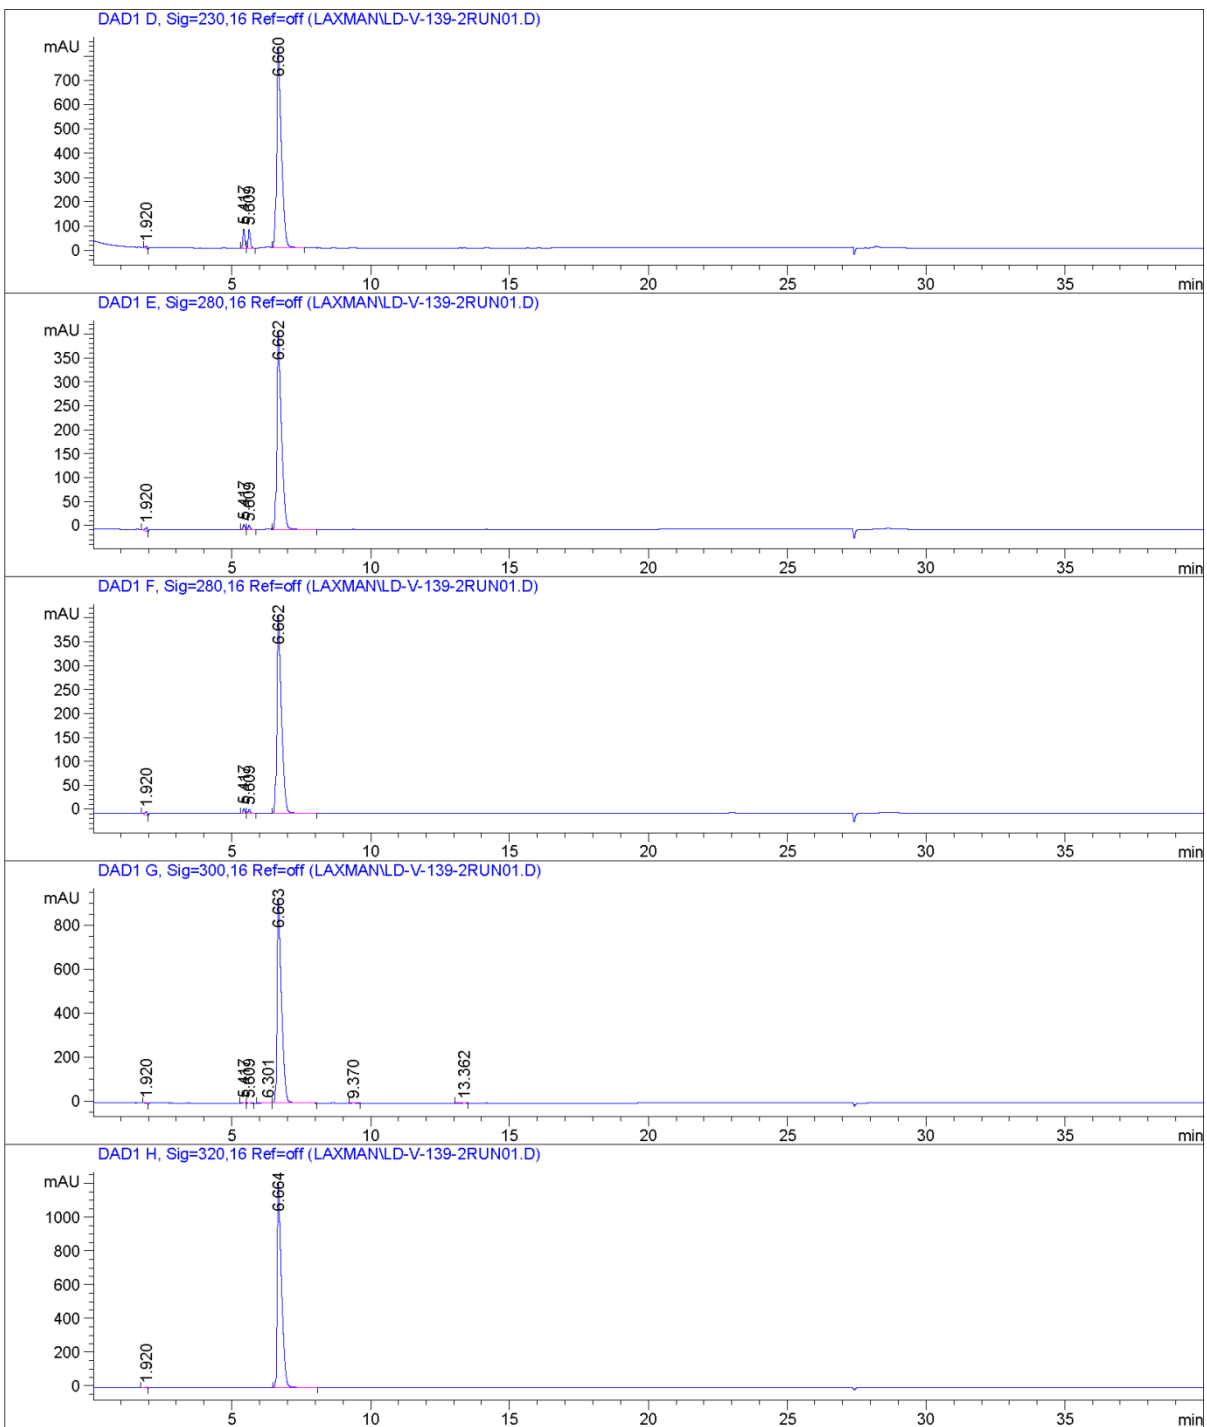

=====  
Area Percent Report  
=====

Sorted By : Signal  
Multiplier : 1.0000  
Dilution : 1.0000  
Use Multiplier & Dilution Factor with ISTDs

Signal 1: DAD1 A, Sig=254,4 Ref=off

| Peak #   | RetTime [min] | Type | Width [min] | Area [mAU*s] | Height [mAU] | Area %  |
|----------|---------------|------|-------------|--------------|--------------|---------|
| 1        | 1.920         | BB   | 0.0775      | 46.97380     | 9.52554      | 0.8652  |
| 2        | 5.417         | BV   | 0.0785      | 73.83537     | 14.72783     | 1.3600  |
| 3        | 5.610         | VB   | 0.0783      | 87.99896     | 17.59993     | 1.6209  |
| 4        | 6.661         | VB   | 0.1616      | 5220.14502   | 455.76682    | 96.1538 |
| Totals : |               |      |             | 5428.95316   | 497.62012    |         |

Signal 2: DAD1 B, Sig=254,16 Ref=off

| Peak #   | RetTime [min] | Type | Width [min] | Area [mAU*s] | Height [mAU] | Area %  |
|----------|---------------|------|-------------|--------------|--------------|---------|
| 1        | 1.920         | BB   | 0.0764      | 44.75594     | 9.26610      | 0.8119  |
| 2        | 5.417         | BV   | 0.0785      | 80.30719     | 16.00931     | 1.4569  |
| 3        | 5.609         | VB   | 0.0784      | 90.60959     | 18.10985     | 1.6438  |
| 4        | 6.661         | VB   | 0.1615      | 5296.55029   | 462.70700    | 96.0874 |
| Totals : |               |      |             | 5512.22301   | 506.09225    |         |

Signal 3: DAD1 C, Sig=210,8 Ref=off

| Peak #   | RetTime [min] | Type | Width [min] | Area [mAU*s] | Height [mAU] | Area %  |
|----------|---------------|------|-------------|--------------|--------------|---------|
| 1        | 4.705         | BB   | 0.0736      | 31.72051     | 6.42426      | 0.2502  |
| 2        | 5.417         | BV   | 0.0786      | 1011.34918   | 201.44394    | 7.9766  |
| 3        | 5.609         | VB   | 0.0784      | 932.56183    | 186.28250    | 7.3552  |
| 4        | 6.656         | VB   | 0.1680      | 1.06542e4    | 875.27972    | 84.0301 |
| 5        | 9.418         | BB   | 0.1088      | 49.18766     | 6.46056      | 0.3879  |
| Totals : |               |      |             | 1.26790e4    | 1275.89098   |         |

Data File C:\CHEM32\1\DATA\LAXMAN\LD-V-139-2RUN01.D  
Sample Name: LD-V-139-2run1

Signal 4: DAD1 D, Sig=230,16 Ref=off

| Peak # | RetTime [min] | Type | Width [min] | Area [mAU*s] | Height [mAU] | Area %  |
|--------|---------------|------|-------------|--------------|--------------|---------|
| 1      | 1.920         | BB   | 0.0702      | 44.30437     | 10.30551     | 0.4233  |
| 2      | 5.417         | BV   | 0.0786      | 388.58575    | 77.37257     | 3.7130  |
| 3      | 5.609         | VB   | 0.0784      | 381.26849    | 76.18825     | 3.6430  |
| 4      | 6.660         | VB   | 0.1644      | 9651.52832   | 825.70642    | 92.2207 |

Totals : 1.04657e4 989.57275

Signal 5: DAD1 E, Sig=280,16 Ref=off

| Peak # | RetTime [min] | Type | Width [min] | Area [mAU*s] | Height [mAU] | Area %  |
|--------|---------------|------|-------------|--------------|--------------|---------|
| 1      | 1.920         | BB   | 0.0868      | 42.78221     | 7.47017      | 0.8821  |
| 2      | 5.417         | BV   | 0.0786      | 51.21740     | 10.19095     | 1.0560  |
| 3      | 5.609         | VB   | 0.0786      | 44.75695     | 8.91765      | 0.9228  |
| 4      | 6.662         | VB   | 0.1583      | 4711.51318   | 415.42648    | 97.1392 |

Totals : 4850.26974 442.00525

Signal 6: DAD1 F, Sig=280,16 Ref=off

| Peak # | RetTime [min] | Type | Width [min] | Area [mAU*s] | Height [mAU] | Area %  |
|--------|---------------|------|-------------|--------------|--------------|---------|
| 1      | 1.920         | BB   | 0.0868      | 42.78221     | 7.47017      | 0.8821  |
| 2      | 5.417         | BV   | 0.0786      | 51.21740     | 10.19095     | 1.0560  |
| 3      | 5.609         | VB   | 0.0786      | 44.75695     | 8.91765      | 0.9228  |
| 4      | 6.662         | VB   | 0.1583      | 4711.51318   | 415.42648    | 97.1392 |

Totals : 4850.26974 442.00525

Signal 7: DAD1 G, Sig=300,16 Ref=off

| Peak # | RetTime [min] | Type | Width [min] | Area [mAU*s] | Height [mAU] | Area %  |
|--------|---------------|------|-------------|--------------|--------------|---------|
| 1      | 1.920         | BB   | 0.0774      | 26.29604     | 5.34806      | 0.2568  |
| 2      | 5.417         | BV   | 0.0789      | 11.63756     | 2.30688      | 0.1137  |
| 3      | 5.609         | VB   | 0.0787      | 10.18231     | 2.02301      | 0.0995  |
| 4      | 6.301         | BV   | 0.2271      | 25.72116     | 1.55393      | 0.2512  |
| 5      | 6.663         | VB   | 0.1552      | 1.01509e4    | 930.72180    | 99.1451 |

Data File C:\CHEM32\1\DATA\LAXMAN\LD-V-139-2RUN01.D  
Sample Name: LD-V-139-2run1

| Peak # | RetTime [min] | Type | Width [min] | Area [mAU*s] | Height [mAU] | Area % |
|--------|---------------|------|-------------|--------------|--------------|--------|
| 6      | 9.370         | BB   | 0.0844      | 5.83878      | 1.05772      | 0.0570 |
| 7      | 13.362        | BB   | 0.1049      | 7.84864      | 1.07818      | 0.0767 |

Totals :                    1.02384e4   944.08958

Signal 8: DAD1 H, Sig=320,16 Ref=off

| Peak # | RetTime [min] | Type | Width [min] | Area [mAU*s] | Height [mAU] | Area %  |
|--------|---------------|------|-------------|--------------|--------------|---------|
| 1      | 1.920         | BB   | 0.0894      | 29.69990     | 4.99136      | 0.2281  |
| 2      | 6.664         | VB   | 0.1527      | 1.29935e4    | 1215.47620   | 99.7719 |

Totals :                    1.30232e4   1220.46756

=====  
\*\*\* End of Report \*\*\*

<sup>1</sup>H NMR (CDCl<sub>3</sub>, 500 MHz) Compound **19**

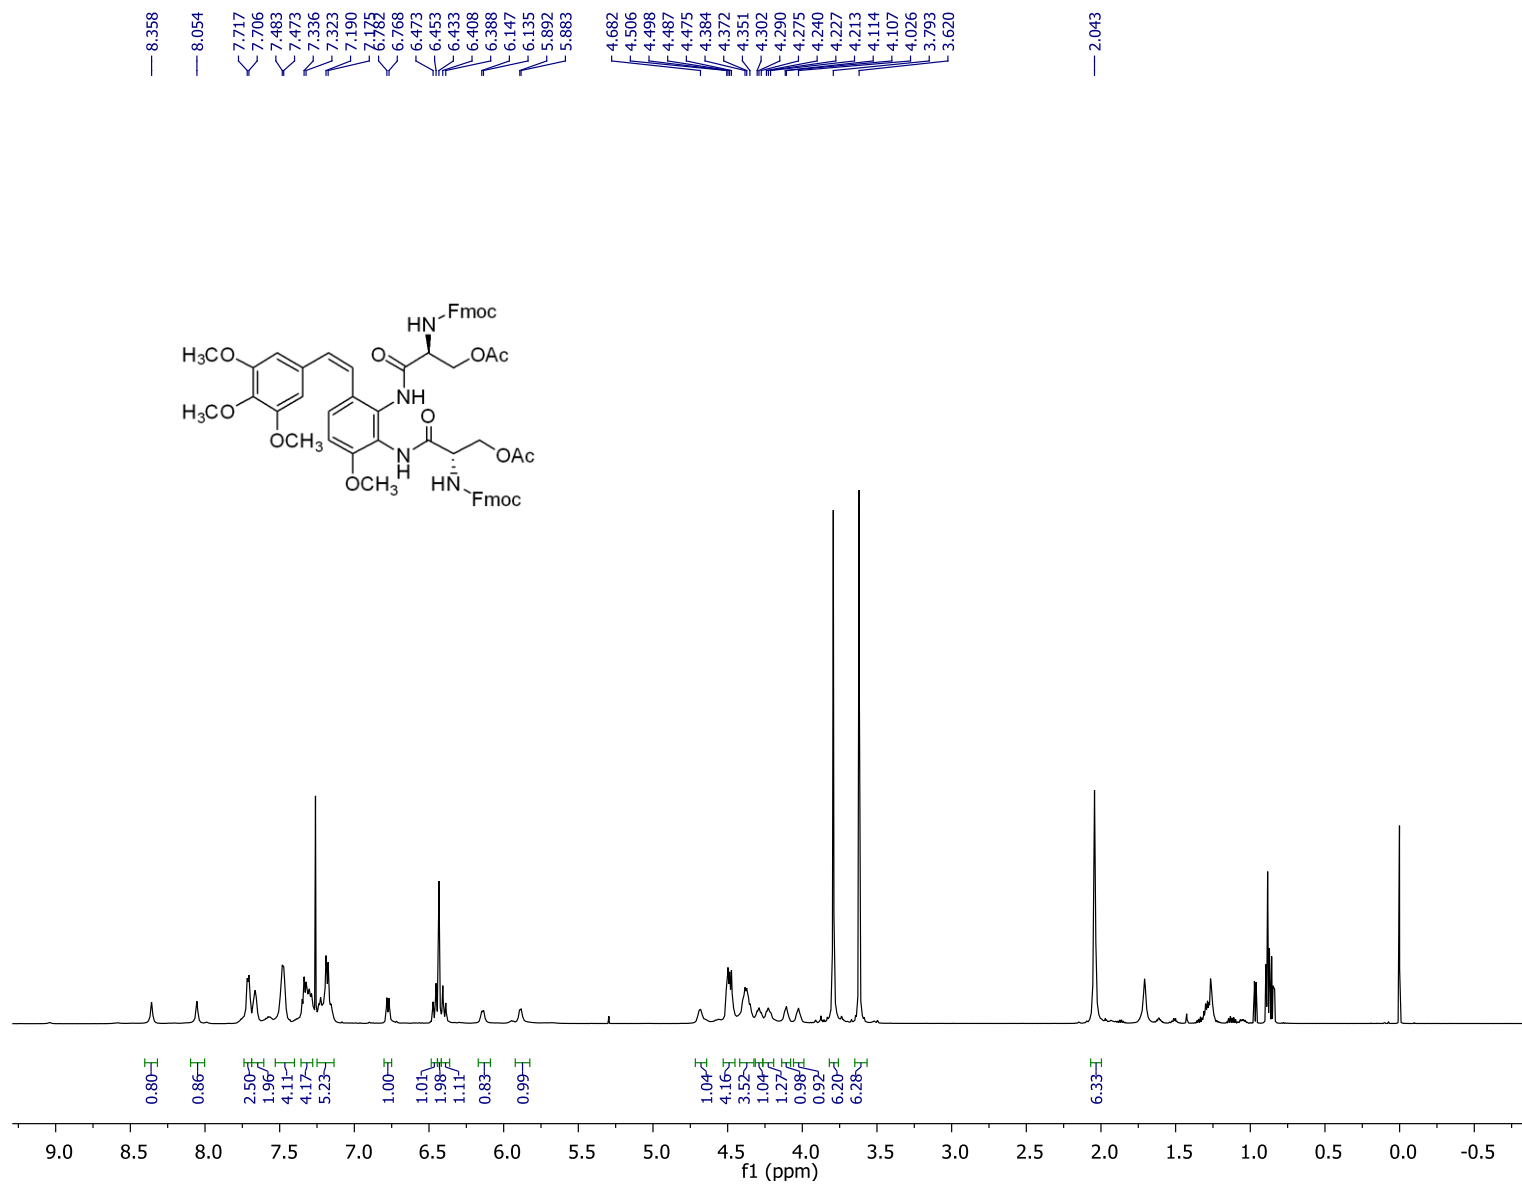

S104



<sup>13</sup>C NMR (CDCl<sub>3</sub>, 150 MHz) Compound **19**

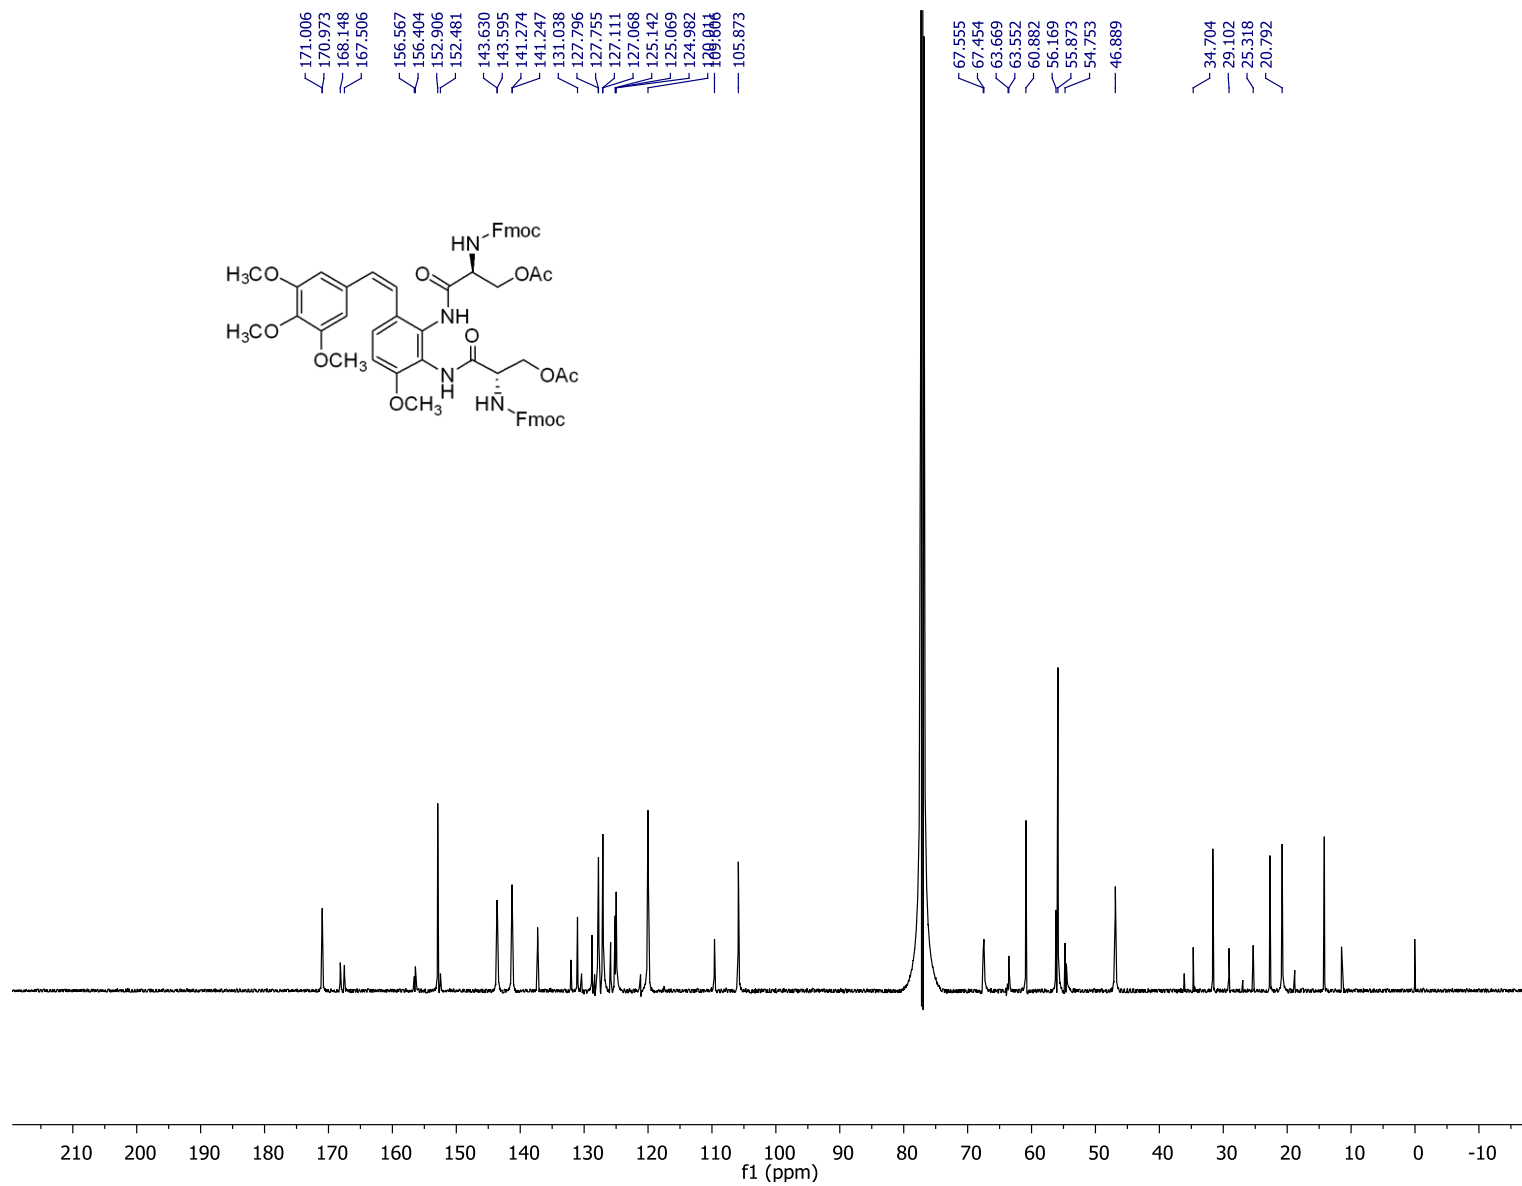

**S105**

<sup>1</sup>H NMR (CDCl<sub>3</sub>, 500 MHz) Compound 20

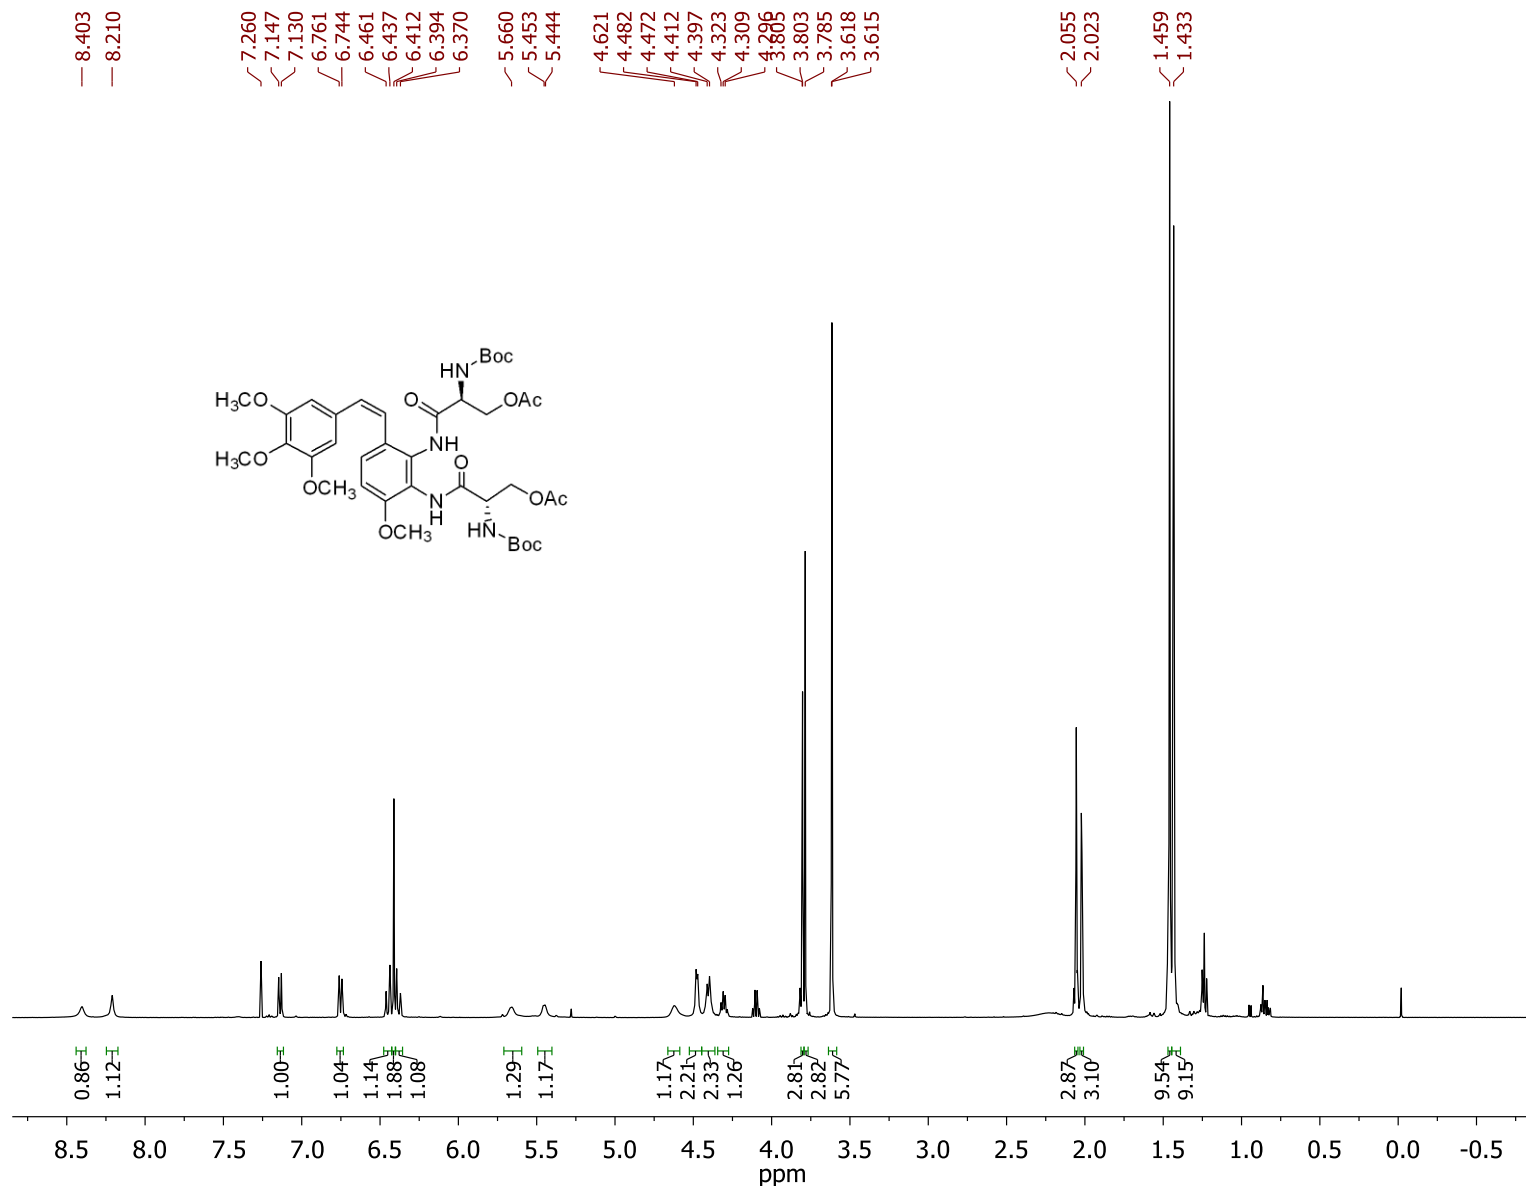

S106

<sup>13</sup>C NMR (CDCl<sub>3</sub>, 125 MHz) Compound **20**

170.971  
170.801  
168.401  
167.673

155.557  
155.338  
152.821  
152.398

137.268  
132.004  
130.911  
130.421  
128.498  
128.364  
125.954  
121.242

109.533  
105.977

77.303  
77.049  
76.795

64.003  
63.916  
60.800  
60.379  
56.128  
55.829  
54.048

28.311  
28.284  
20.663  
20.649

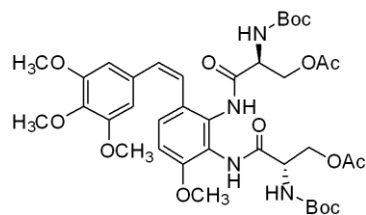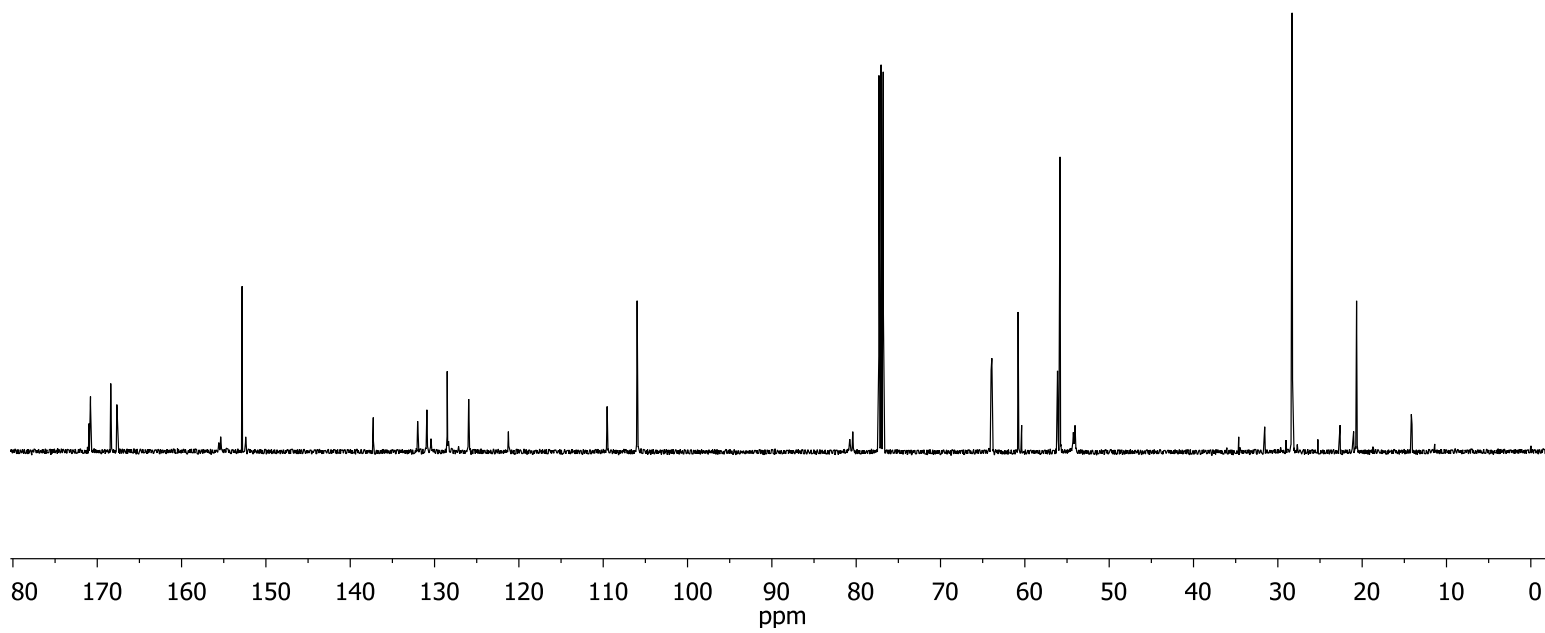

S107

<sup>1</sup>H NMR (CDCl<sub>3</sub>, 600 MHz) Compound 21

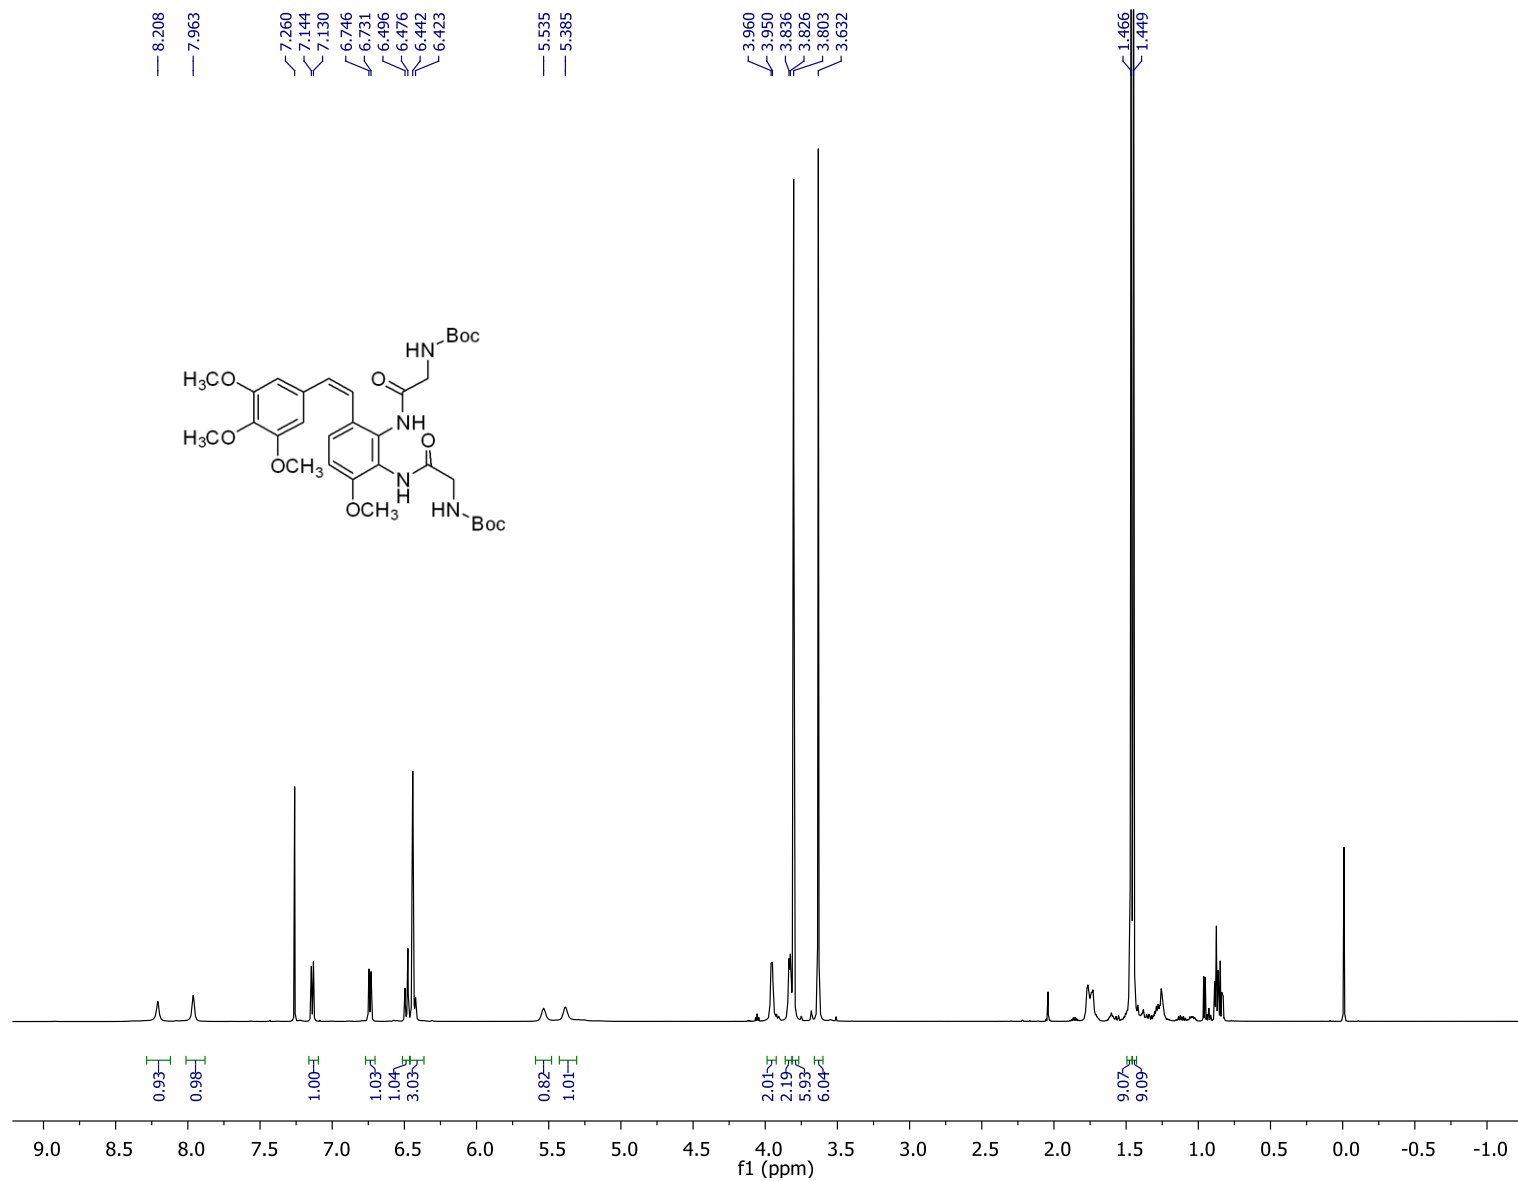

S108

<sup>13</sup>C NMR (CDCl<sub>3</sub>, 150 MHz) Compound **21**

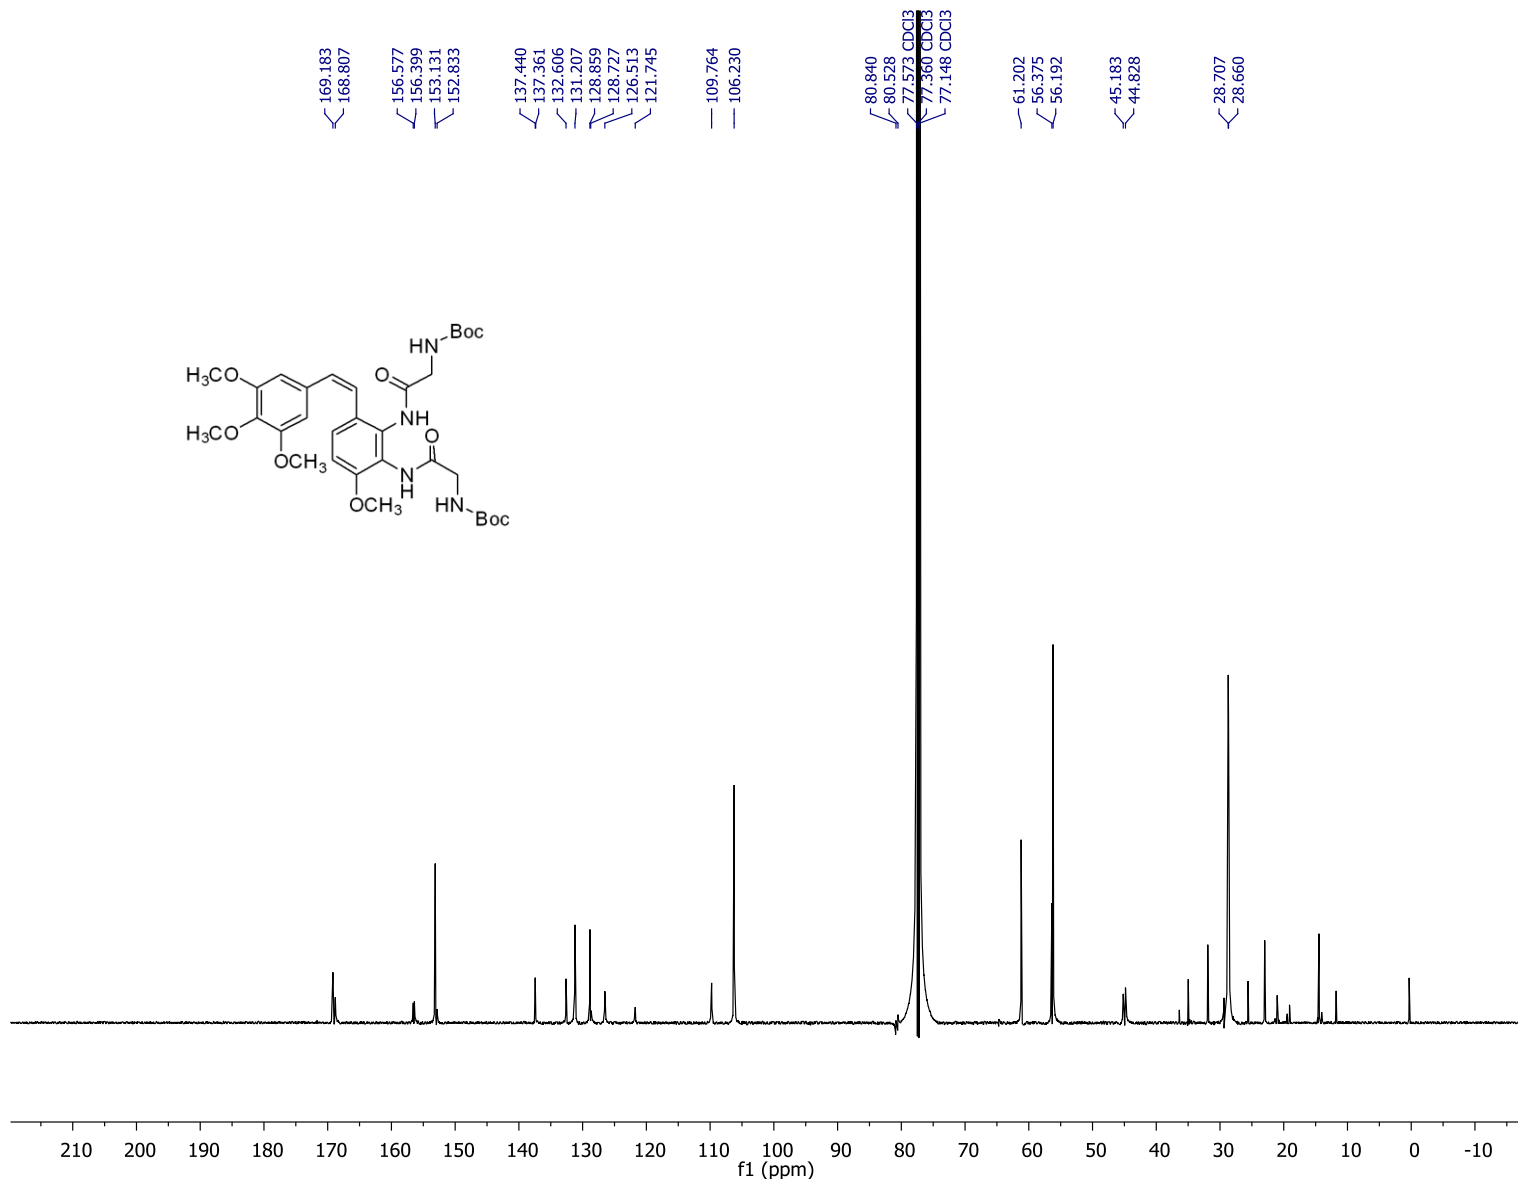

**S109**

<sup>1</sup>H NMR (CD<sub>3</sub>OD, 600 MHz) Compound **22**

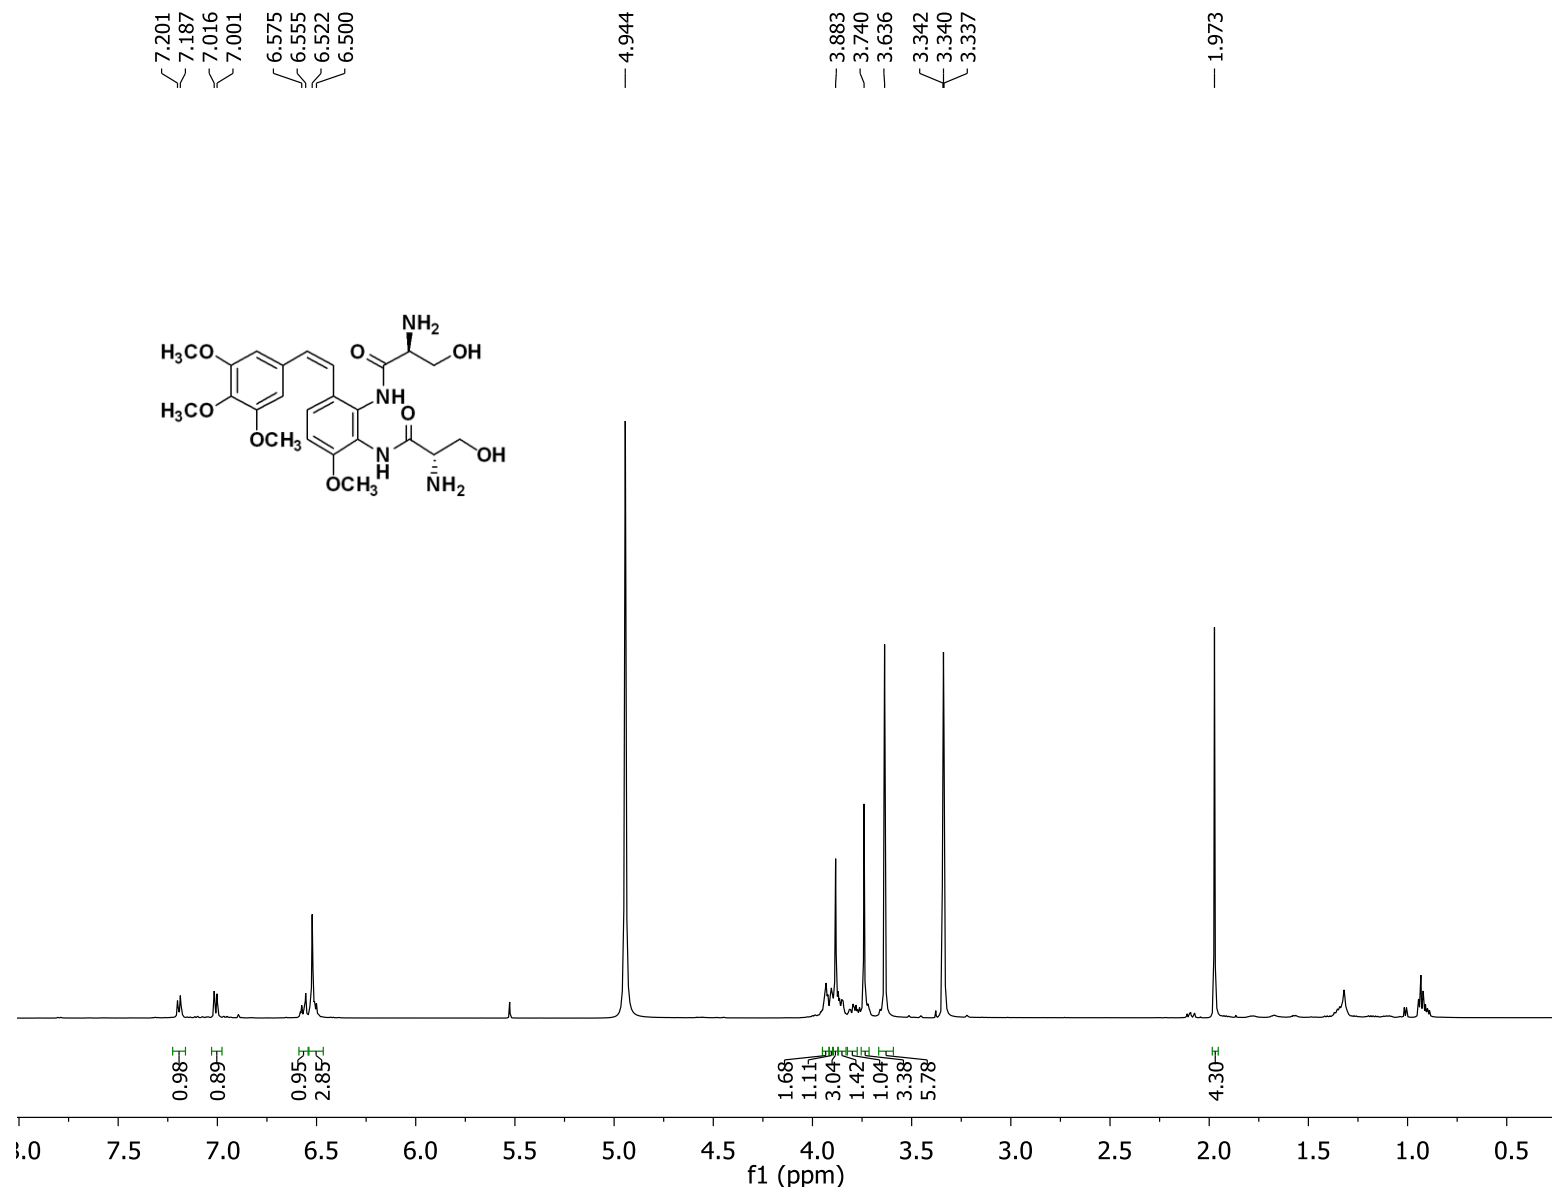

**S110**

<sup>13</sup>C NMR (CD<sub>3</sub>OD, 150 MHz) Compound **22**

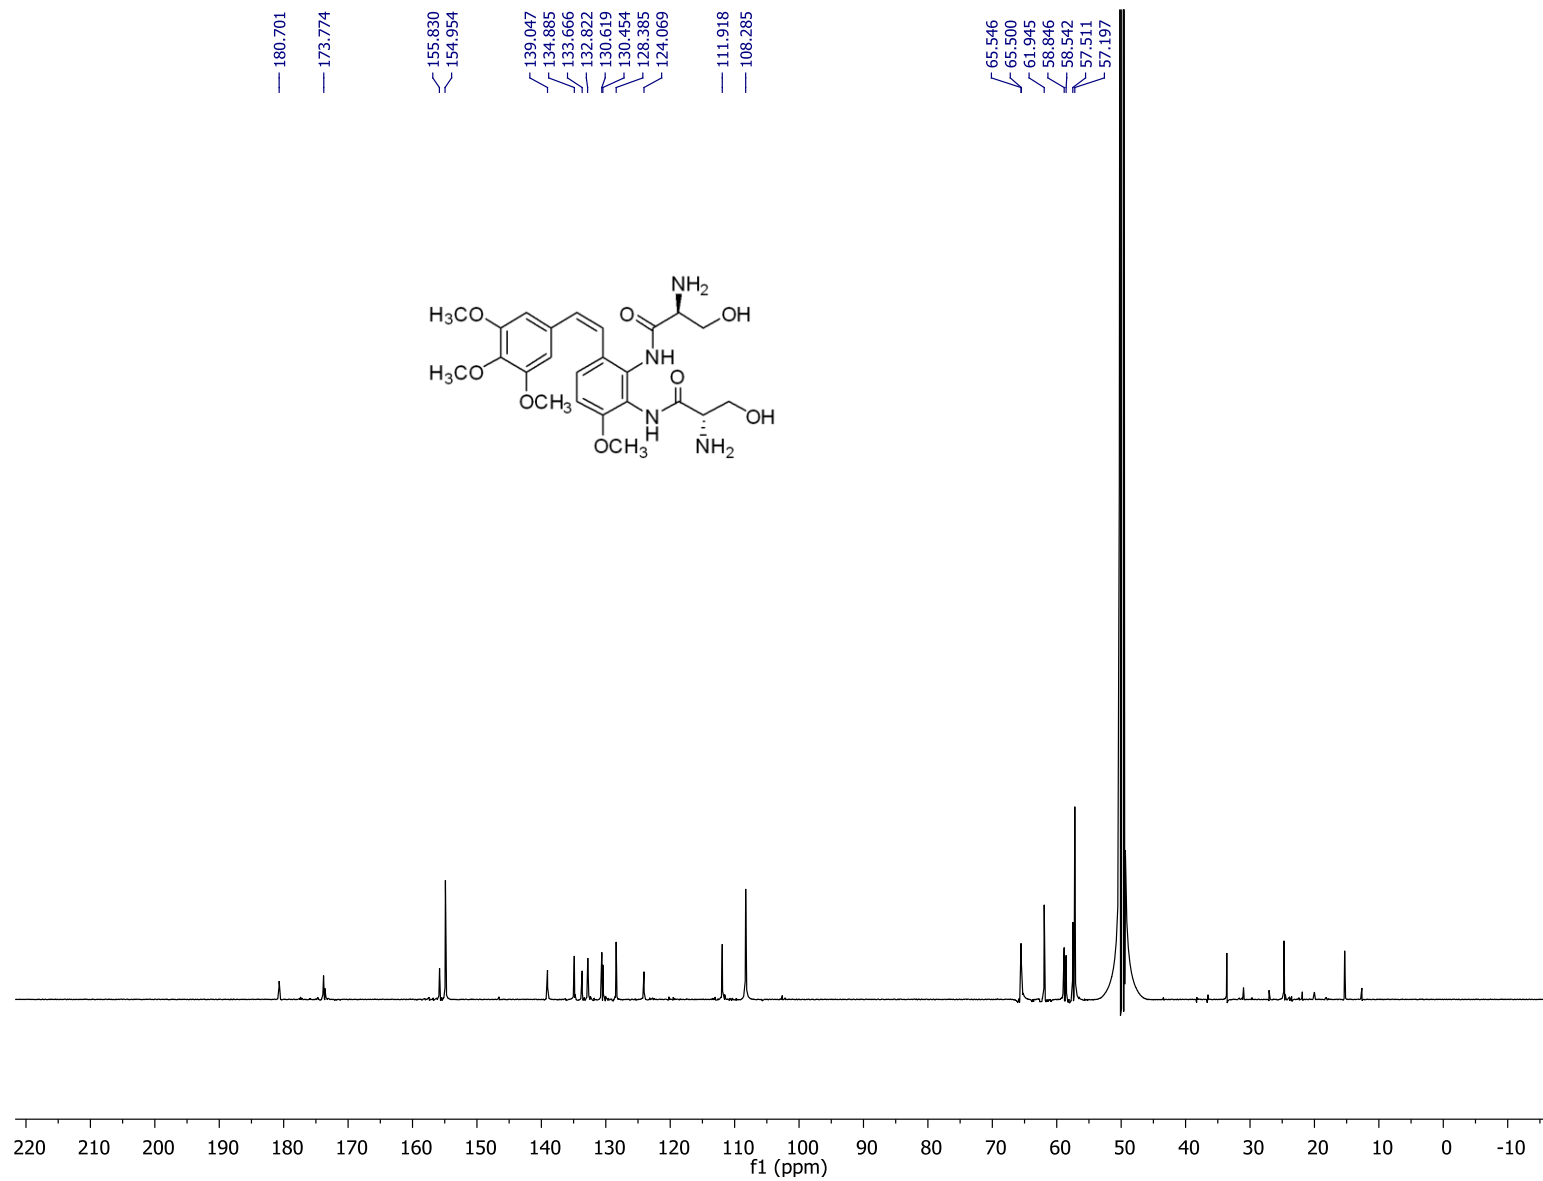

**S111**

# HRMS Compound 22

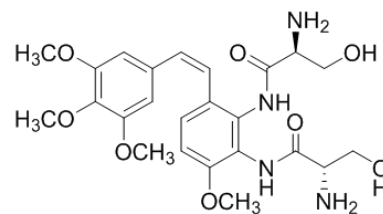

**Chemical Formula: C<sub>24</sub>H<sub>32</sub>N<sub>4</sub>O<sub>8</sub>**  
**Exact Mass: 504.2220**

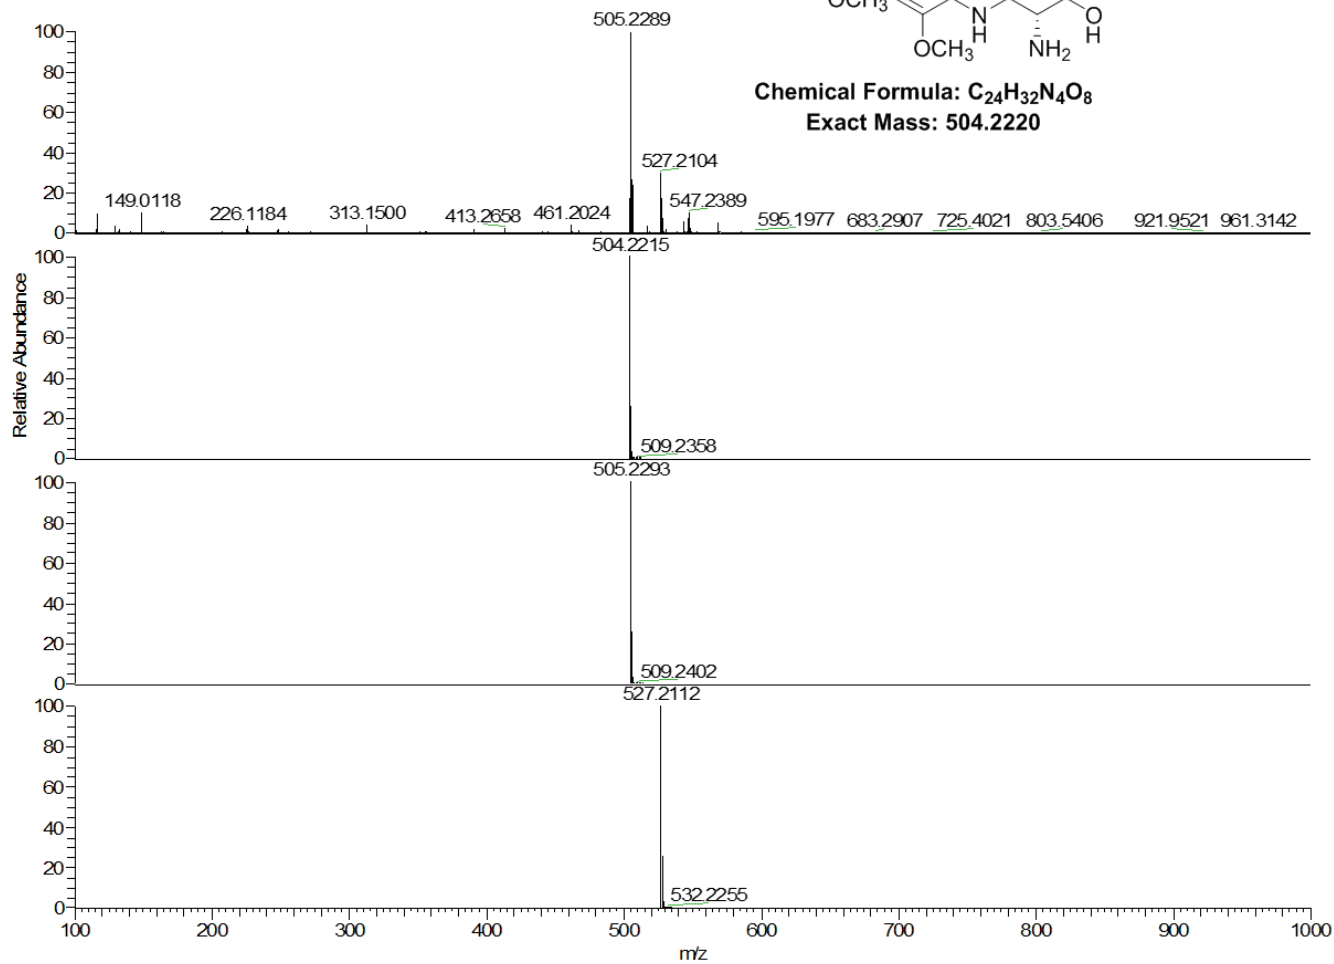

NL:  
1.55E7  
LD-VI-121\_Orbi\_+  
ES#1 RT: 0.01 AV:  
1 T: FTMS +p ESI  
Full ms  
[100.00-1000.00]

NL:  
7.44E5  
C<sub>24</sub>H<sub>32</sub>N<sub>4</sub>O<sub>8</sub>:  
C<sub>24</sub>H<sub>32</sub>N<sub>4</sub>O<sub>8</sub>  
pa Chrg 1

NL:  
7.44E5  
C<sub>24</sub>H<sub>32</sub>N<sub>4</sub>O<sub>8</sub>+H:  
C<sub>24</sub>H<sub>33</sub>N<sub>4</sub>O<sub>8</sub>  
pa Chrg 1

NL:  
7.44E5  
C<sub>24</sub>H<sub>32</sub>N<sub>4</sub>O<sub>8</sub>+Na:  
C<sub>24</sub>H<sub>32</sub>N<sub>4</sub>O<sub>8</sub>Na<sub>1</sub>  
pa Chrg 1



## HPLC for Compound 22

Data File C:\CHEM32\1\DATA\LAXMAN\LD-VI-121-RUN05.D

Sample Name: LD-VI-121-run5

```
=====
Acq. Operator   : Laxman
Acq. Instrument : Instrument 1                      Location : -
Injection Date  : 2/4/2015 9:18:24 AM
Acq. Method     : C:\CHEM32\1\METHODS\MASTERMETHOD2.M
Last changed    : 2/4/2015 9:15:35 AM by Laxman
Analysis Method : C:\CHEM32\1\DATA\LAXMAN\LD-VI-121-RUN05.D\DA.M (MASTERMETHOD2.M)
Last changed    : 2/4/2015 10:03:37 AM by Laxman
Sample Info     : Method=Mastermethod2
                  0.05% TFA/H2O
=====
```

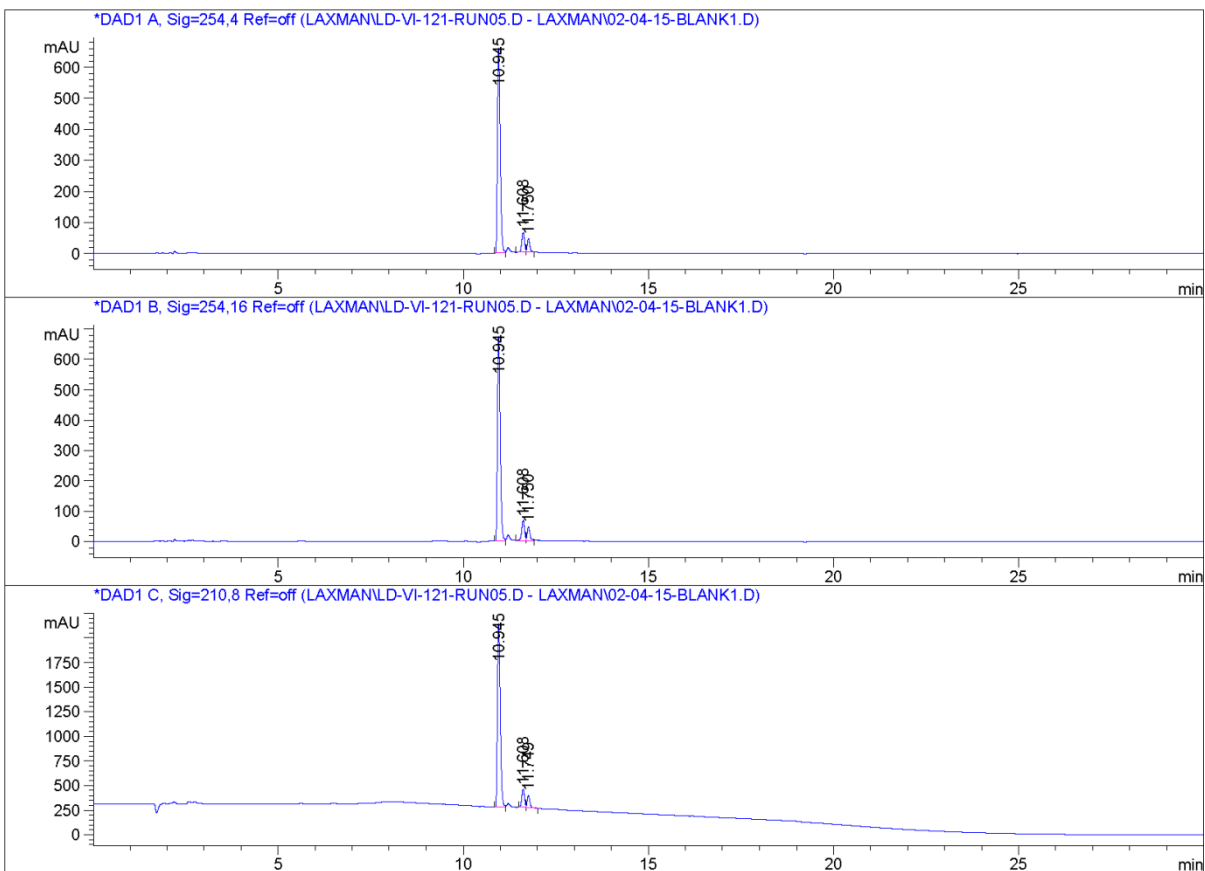

Data File C:\CHEM32\1\DATA\LAXMAN\LD-VI-121-RUN05.D  
Sample Name: LD-VI-121-run5

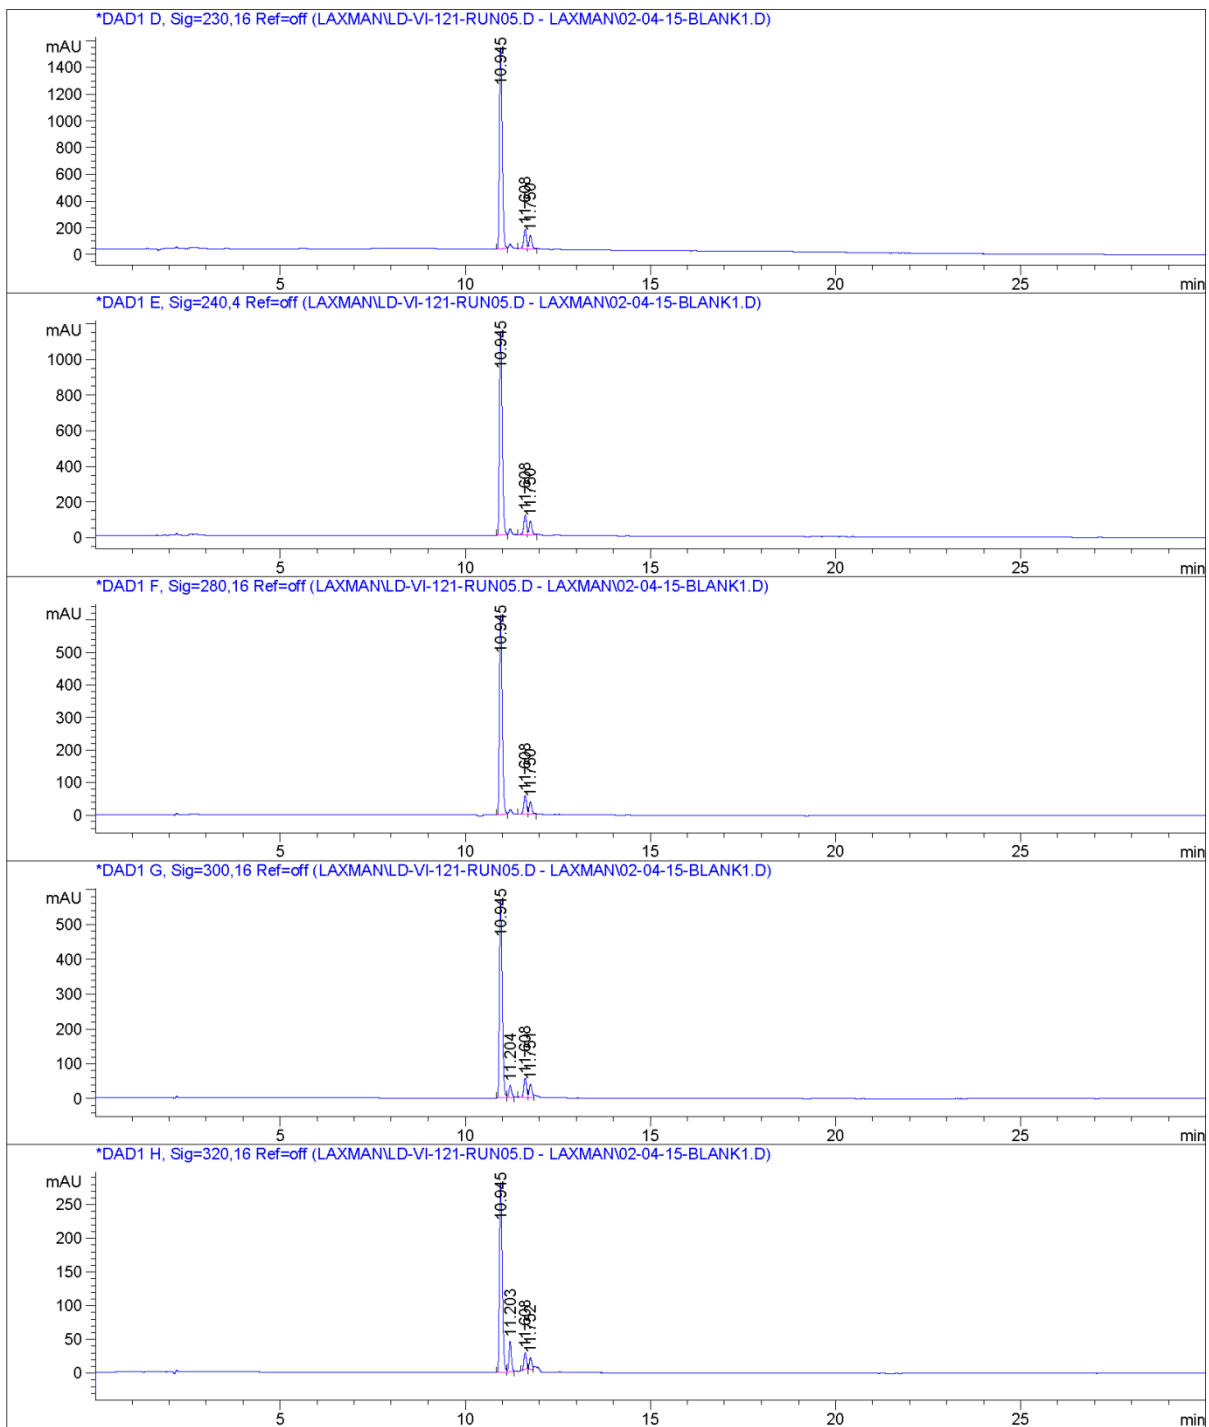

=====  
Area Percent Report  
=====

Sorted By : Signal  
Multiplier : 1.0000  
Dilution : 1.0000  
Use Multiplier & Dilution Factor with ISTDs

Signal 1: DAD1 A, Sig=254,4 Ref=off  
Signal has been modified after loading from rawdata file!

| Peak # | RetTime [min] | Type | Width [min] | Area [mAU*s] | Height [mAU] | Area %  |
|--------|---------------|------|-------------|--------------|--------------|---------|
| 1      | 10.945        | BV   | 0.0806      | 3429.38184   | 660.40332    | 85.7238 |
| 2      | 11.608        | BV   | 0.0818      | 342.65540    | 64.67617     | 8.5653  |
| 3      | 11.750        | VV   | 0.0771      | 228.46587    | 45.06903     | 5.7109  |

Totals : 4000.50310 770.14853

Signal 2: DAD1 B, Sig=254,16 Ref=off  
Signal has been modified after loading from rawdata file!

| Peak # | RetTime [min] | Type | Width [min] | Area [mAU*s] | Height [mAU] | Area %  |
|--------|---------------|------|-------------|--------------|--------------|---------|
| 1      | 10.945        | BV   | 0.0806      | 3503.13452   | 674.69476    | 85.7581 |
| 2      | 11.608        | BV   | 0.0818      | 348.86224    | 65.84724     | 8.5403  |
| 3      | 11.750        | VV   | 0.0771      | 232.90524    | 45.94286     | 5.7016  |

Totals : 4084.90201 786.48487

Signal 3: DAD1 C, Sig=210,8 Ref=off  
Signal has been modified after loading from rawdata file!

| Peak # | RetTime [min] | Type | Width [min] | Area [mAU*s] | Height [mAU] | Area %  |
|--------|---------------|------|-------------|--------------|--------------|---------|
| 1      | 10.945        | BV   | 0.0842      | 9926.38086   | 1861.91199   | 86.6126 |
| 2      | 11.608        | BV   | 0.0789      | 927.72119    | 183.65503    | 8.0948  |
| 3      | 11.749        | VB   | 0.0748      | 606.56696    | 124.58265    | 5.2926  |

Totals : 1.14607e4 2170.14967

Data File C:\CHEM32\1\DATA\LAXMAN\LD-VI-121-RUN05.D  
Sample Name: LD-VI-121-run5

Signal 4: DAD1 D, Sig=230,16 Ref=off  
Signal has been modified after loading from rawdata file!

| Peak # | RetTime [min] | Type | Width [min] | Area [mAU*s] | Height [mAU] | Area %  |
|--------|---------------|------|-------------|--------------|--------------|---------|
| 1      | 10.945        | BV   | 0.0808      | 7864.29395   | 1509.11328   | 85.7517 |
| 2      | 11.608        | BV   | 0.0822      | 780.64148    | 146.49777    | 8.5121  |
| 3      | 11.750        | VV   | 0.0783      | 526.07617    | 101.73031    | 5.7363  |

Totals : 9171.01160 1757.34136

Signal 5: DAD1 E, Sig=240,4 Ref=off  
Signal has been modified after loading from rawdata file!

| Peak # | RetTime [min] | Type | Width [min] | Area [mAU*s] | Height [mAU] | Area %  |
|--------|---------------|------|-------------|--------------|--------------|---------|
| 1      | 10.945        | BV   | 0.0806      | 5953.35156   | 1145.60352   | 85.4289 |
| 2      | 11.608        | BV   | 0.0823      | 600.10669    | 112.39833    | 8.6114  |
| 3      | 11.750        | VV   | 0.0793      | 415.31732    | 79.05017     | 5.9597  |

Totals : 6968.77557 1337.05202

Signal 6: DAD1 F, Sig=280,16 Ref=off  
Signal has been modified after loading from rawdata file!

| Peak # | RetTime [min] | Type | Width [min] | Area [mAU*s] | Height [mAU] | Area %  |
|--------|---------------|------|-------------|--------------|--------------|---------|
| 1      | 10.945        | BV   | 0.0805      | 3185.41992   | 613.96997    | 86.4240 |
| 2      | 11.608        | BV   | 0.0817      | 305.75058    | 57.77947     | 8.2954  |
| 3      | 11.750        | VV   | 0.0770      | 194.63496    | 38.46372     | 5.2807  |

Totals : 3685.80547 710.21316

Signal 7: DAD1 G, Sig=300,16 Ref=off  
Signal has been modified after loading from rawdata file!

| Peak # | RetTime [min] | Type | Width [min] | Area [mAU*s] | Height [mAU] | Area %  |
|--------|---------------|------|-------------|--------------|--------------|---------|
| 1      | 10.945        | BV   | 0.0809      | 2988.00757   | 572.34558    | 81.8322 |
| 2      | 11.204        | VV   | 0.0725      | 169.99767    | 35.08196     | 4.6557  |
| 3      | 11.608        | BV   | 0.0823      | 296.85989    | 55.58070     | 8.1301  |
| 4      | 11.751        | VV   | 0.0785      | 196.51675    | 37.88121     | 5.3820  |

Data File C:\CHEM32\1\DATA\LAXMAN\LD-VI-121-RUN05.D  
Sample Name: LD-VI-121-run5

| Peak #   | RetTime [min] | Type | Width [min] | Area [mAU*s] | Height [mAU] | Area % |
|----------|---------------|------|-------------|--------------|--------------|--------|
| Totals : |               |      |             | 3651.38188   | 700.88945    |        |

Signal 8: DAD1 H, Sig=320,16 Ref=off  
Signal has been modified after loading from rawdata file!

| Peak #   | RetTime [min] | Type | Width [min] | Area [mAU*s] | Height [mAU] | Area %  |
|----------|---------------|------|-------------|--------------|--------------|---------|
| 1        | 10.945        | BV   | 0.0814      | 1481.12476   | 281.65887    | 78.3325 |
| 2        | 11.203        | VV   | 0.0685      | 204.32208    | 45.42173     | 10.8060 |
| 3        | 11.608        | BB   | 0.0749      | 121.84870    | 25.89132     | 6.4442  |
| 4        | 11.752        | BV   | 0.0733      | 83.52104     | 17.62517     | 4.4172  |
| Totals : |               |      |             | 1890.81658   | 370.59708    |         |

=====  
\*\*\* End of Report \*\*\*

<sup>1</sup>H NMR (CD<sub>3</sub>OD, 500 MHz) Compound **23**

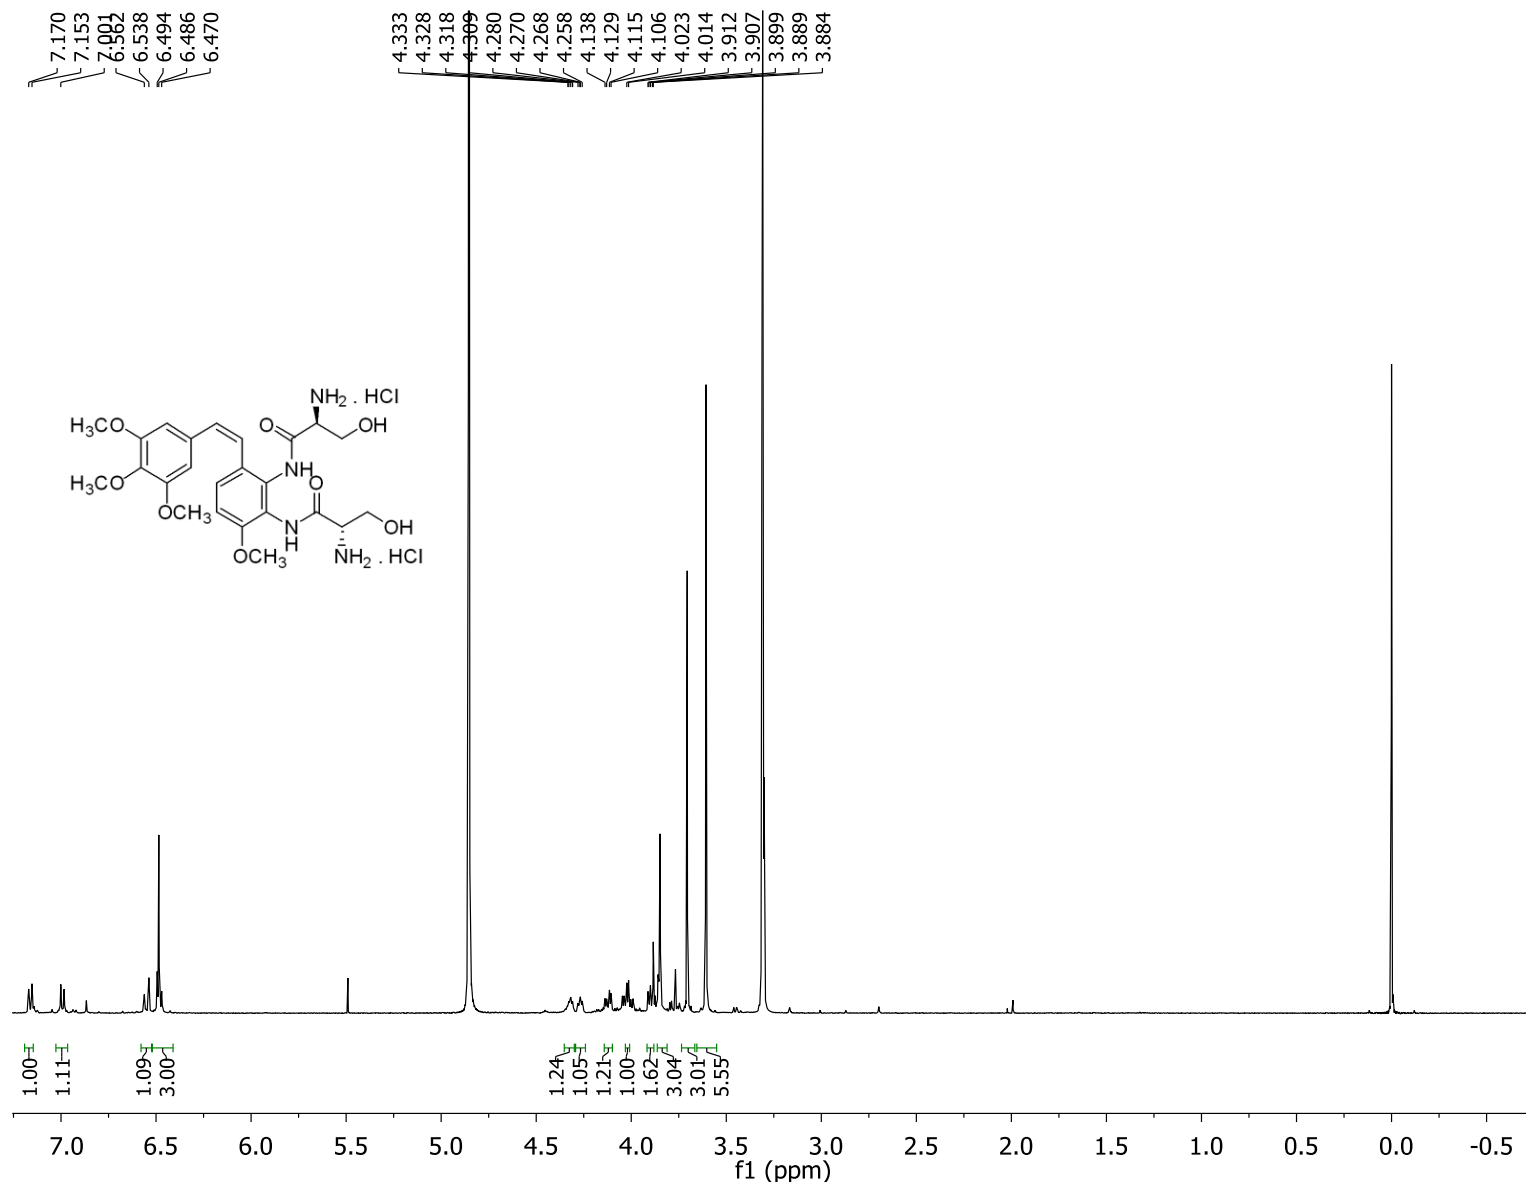

**S118**

<sup>13</sup>C NMR (CD<sub>3</sub>OD, 150 MHz) Compound **23**

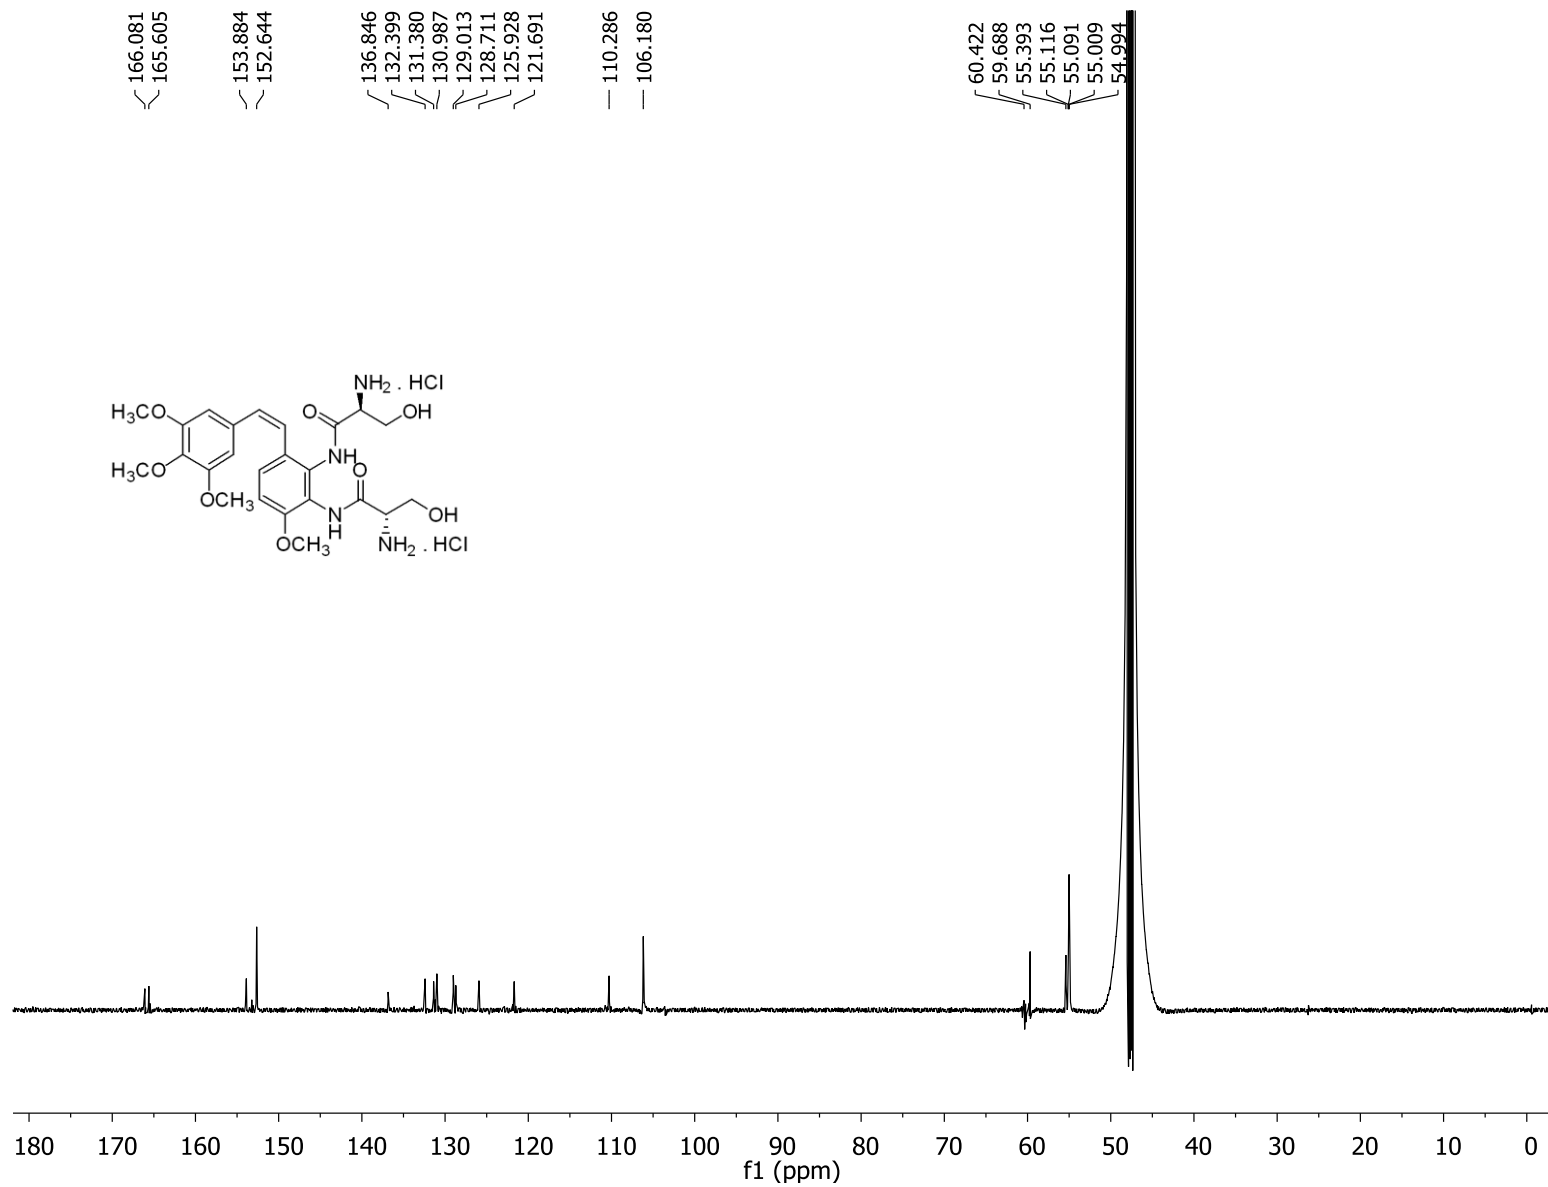

**S119**

# HRMS Compound 23

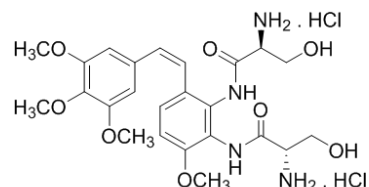

Chemical Formula:  $C_{24}H_{34}Cl_2N_4O_8$   
 Exact Mass: 576.1754

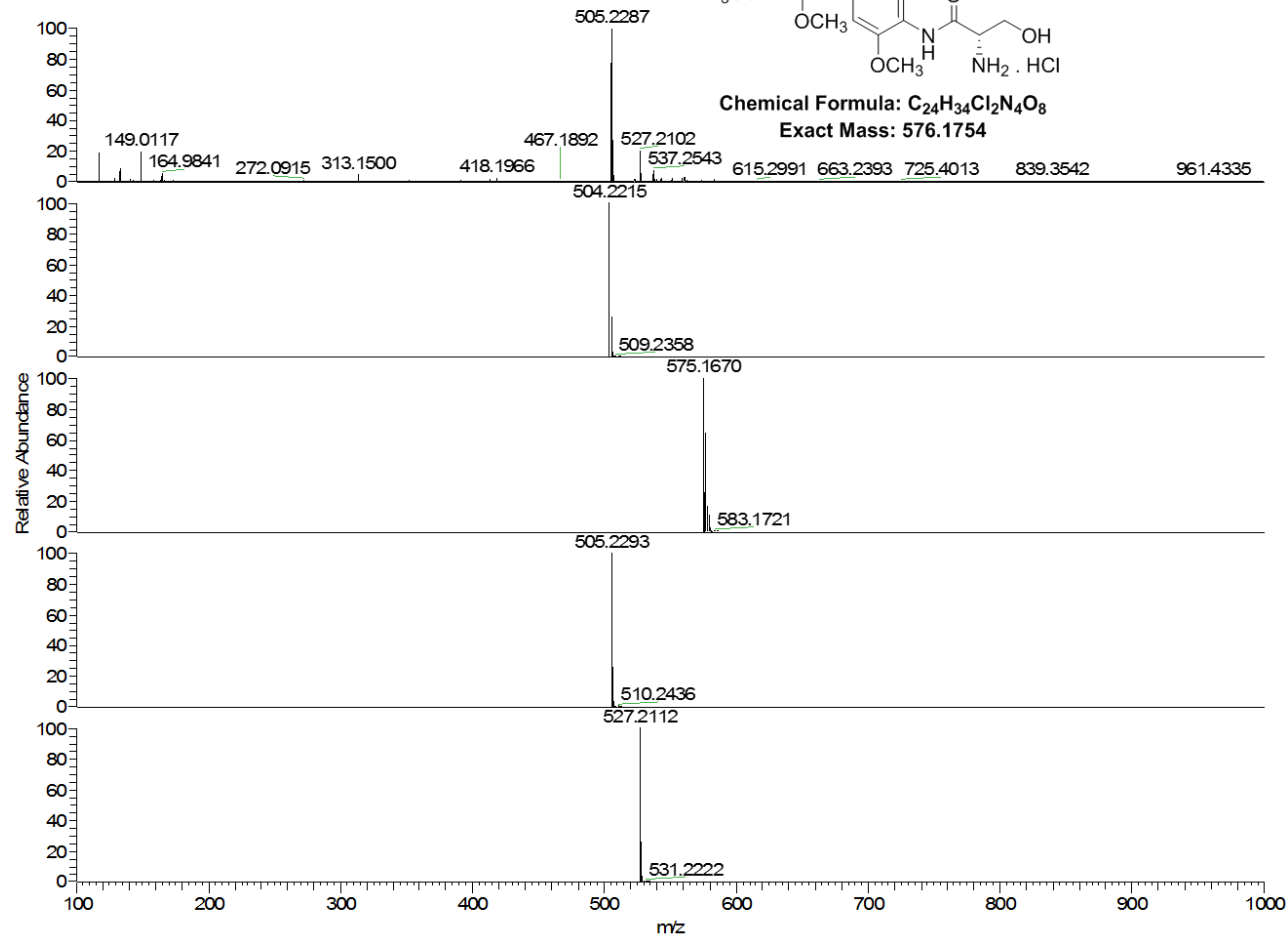

NL:  
 2.25E7  
 LD-VI-145 Orbi\_+  
 ES#1 RT: 0.00 AV: 1  
 T: FTMS + p ESI Full  
 ms [100.00-1000.00]

NL:  
 7.44E5  
 $C_{24}H_{32}N_4O_8$   
 $C_{24}H_{32}N_4O_8$   
 pa Chrg 1

NL:  
 4.27E5  
 $C_{24}H_{33}Cl_2N_4O_8$   
 $C_{24}H_{33}Cl_2N_4O_8$   
 pa Chrg 1

NL:  
 7.44E5  
 $C_{24}H_{32}N_4O_8 + H$   
 $C_{24}H_{33}N_4O_8$   
 pa Chrg 1

NL:  
 7.44E5  
 $C_{24}H_{32}N_4O_8 + Na$   
 $C_{24}H_{32}N_4O_8 Na_1$   
 pa Chrg 1



# HPLC for Compound 23

Data File C:\CHEM32\1\DATA\LAXMAN\LD-VI-145-00002.D

Sample Name: LD-VI-145-run2

```
=====
Acq. Operator   : Laxman
Acq. Instrument : Instrument 1                      Location : -
Injection Date  : 2/3/2015 10:54:00 AM
Acq. Method     : C:\CHEM32\1\METHODS\MASTERMETHOD2.M
Last changed    : 2/3/2015 10:52:45 AM by Laxman
Analysis Method : C:\CHEM32\1\DATA\LAXMAN\LD-VI-145-00002.D\DA.M (MASTERMETHOD2.M)
Last changed    : 2/4/2015 9:20:40 AM by Laxman
Sample Info     : Method-Mastermethod2
```

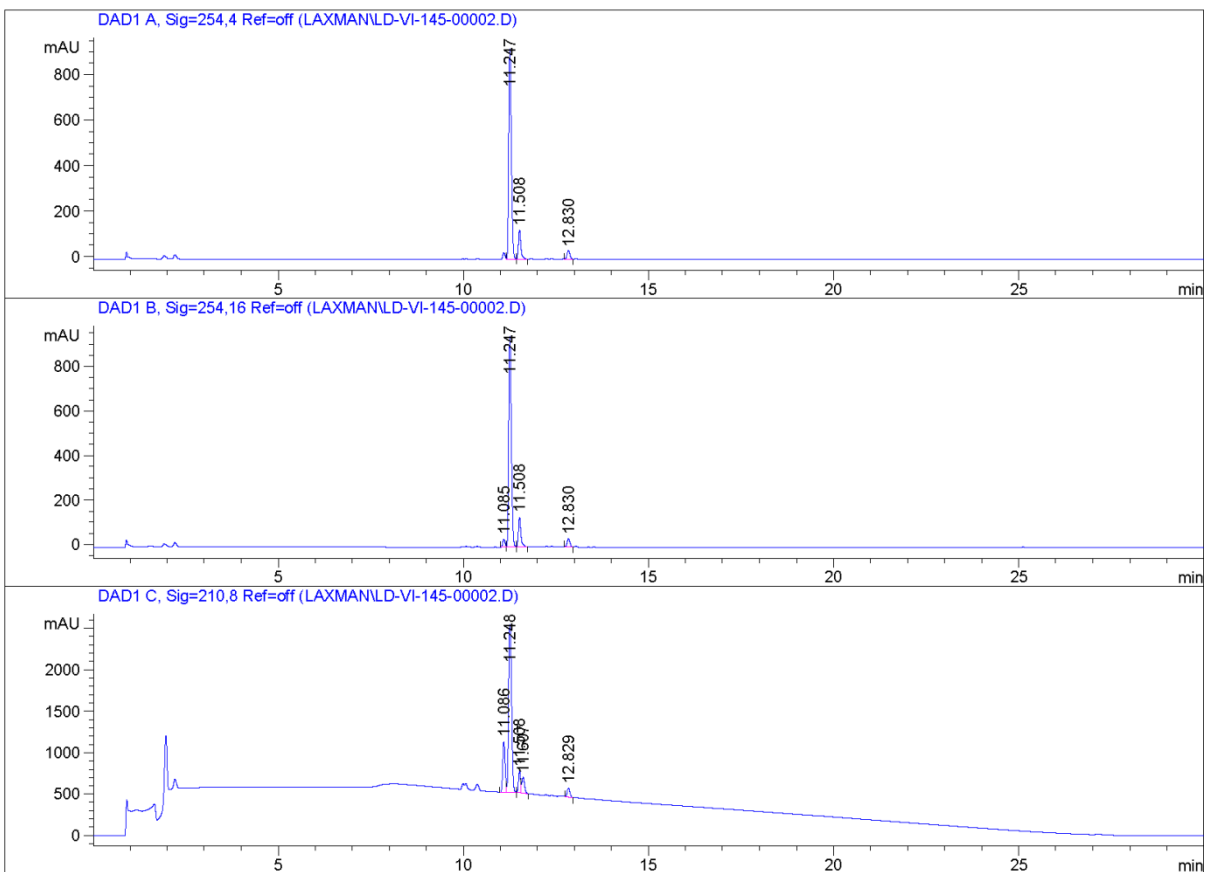

Data File C:\CHEM32\1\DATA\LAXMAN\LD-VI-145-00002.D  
Sample Name: LD-VI-145-run2

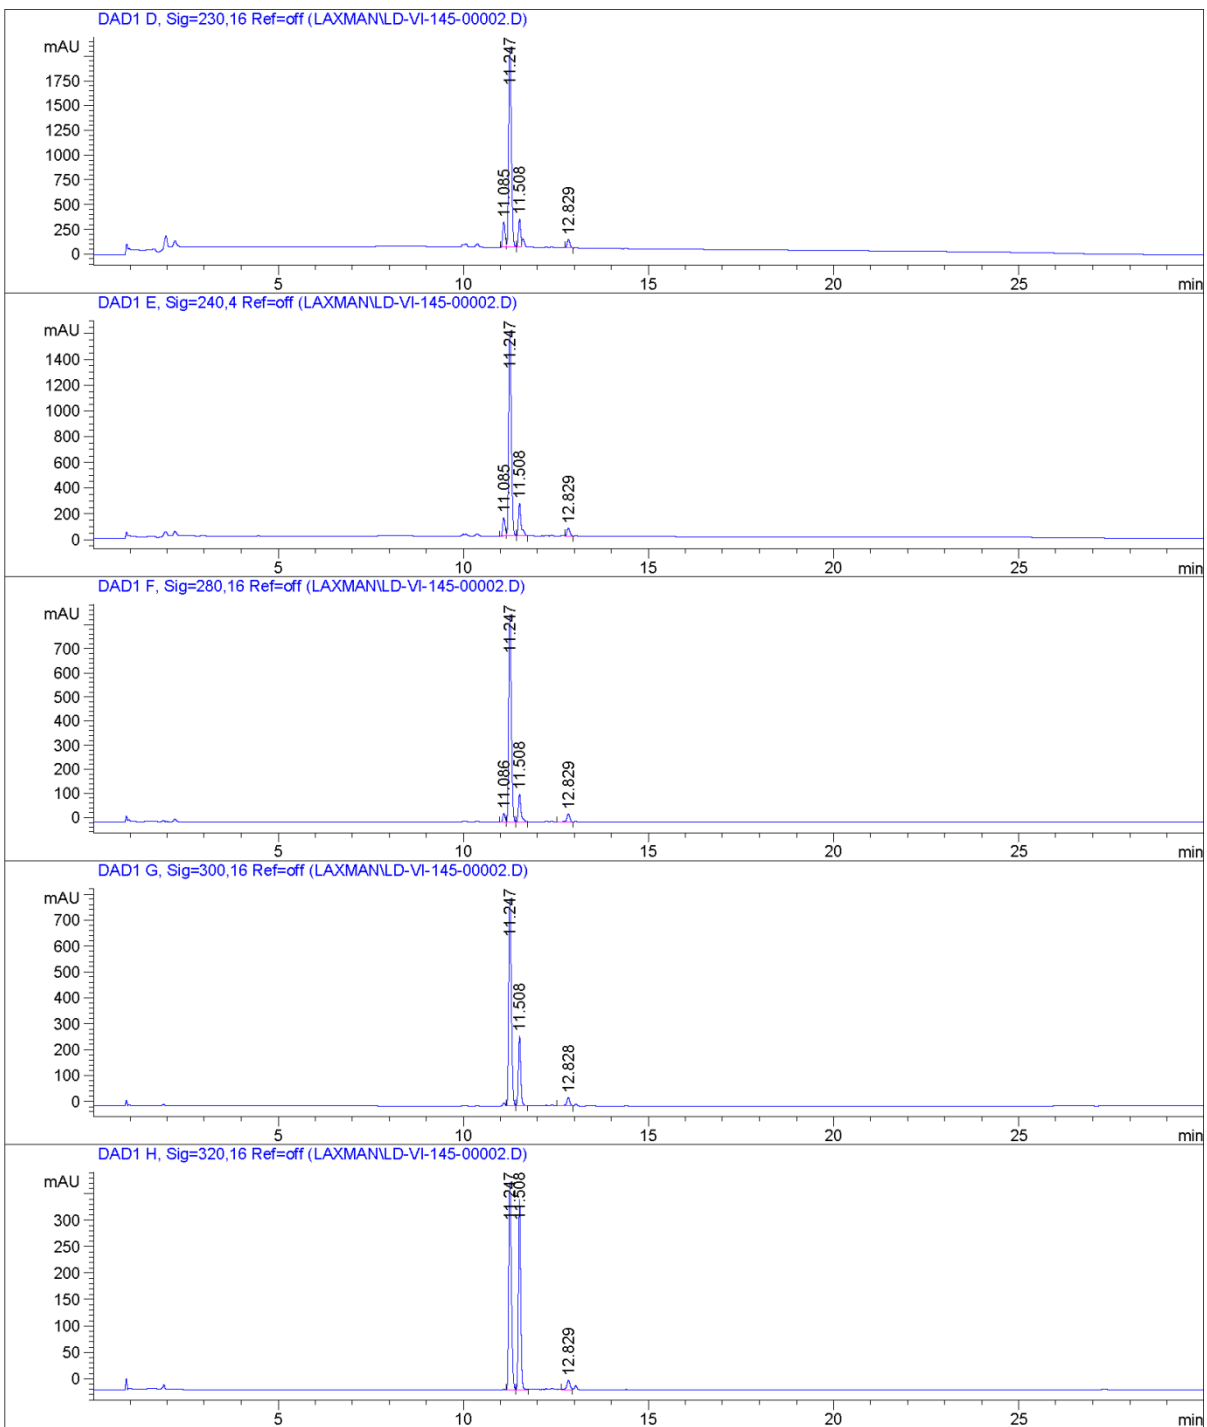

=====  
Area Percent Report  
=====

Sorted By : Signal  
Multiplier : 1.0000  
Dilution : 1.0000  
Use Multiplier & Dilution Factor with ISTDs

Signal 1: DAD1 A, Sig=254,4 Ref=off

| Peak # | RetTime [min] | Type | Width [min] | Area [mAU*s] | Height [mAU] | Area %  |
|--------|---------------|------|-------------|--------------|--------------|---------|
| 1      | 11.247        | VV   | 0.0750      | 4529.85498   | 927.61292    | 84.7722 |
| 2      | 11.508        | VB   | 0.0703      | 604.70068    | 129.86781    | 11.3164 |
| 3      | 12.830        | VV   | 0.0862      | 209.00600    | 38.00933     | 3.9114  |

Totals : 5343.56166 1095.49006

Signal 2: DAD1 B, Sig=254,16 Ref=off

| Peak # | RetTime [min] | Type | Width [min] | Area [mAU*s] | Height [mAU] | Area %  |
|--------|---------------|------|-------------|--------------|--------------|---------|
| 1      | 11.085        | BV   | 0.0666      | 158.56816    | 36.54854     | 2.8155  |
| 2      | 11.247        | VV   | 0.0750      | 4626.72656   | 947.20282    | 82.1503 |
| 3      | 11.508        | VB   | 0.0711      | 634.57526    | 134.26546    | 11.2673 |
| 4      | 12.830        | VV   | 0.0861      | 212.15869    | 38.62234     | 3.7670  |

Totals : 5632.02867 1156.63916

Signal 3: DAD1 C, Sig=210,8 Ref=off

| Peak # | RetTime [min] | Type | Width [min] | Area [mAU*s] | Height [mAU] | Area %  |
|--------|---------------|------|-------------|--------------|--------------|---------|
| 1      | 11.086        | BV   | 0.0678      | 2736.85107   | 615.96875    | 16.5802 |
| 2      | 11.248        | VB   | 0.0883      | 1.11715e4    | 2027.12781   | 67.6783 |
| 3      | 11.508        | BV   | 0.0638      | 1073.51233   | 262.24918    | 6.5035  |
| 4      | 11.607        | VB   | 0.0726      | 937.48230    | 193.35208    | 5.6794  |
| 5      | 12.829        | VB   | 0.0846      | 587.43060    | 109.54142    | 3.5587  |

Totals : 1.65068e4 3208.23923

Data File C:\CHEM32\1\DATA\LAXMAN\LD-VI-145-00002.D  
Sample Name: LD-VI-145-run2

Signal 4: DAD1 D, Sig=230,16 Ref=off

| Peak # | RetTime [min] | Type | Width [min] | Area [mAU*s] | Height [mAU] | Area %  |
|--------|---------------|------|-------------|--------------|--------------|---------|
| 1      | 11.085        | BV   | 0.0671      | 1128.58777   | 257.43103    | 8.7839  |
| 2      | 11.247        | VB   | 0.0801      | 1.00606e4    | 2019.74780   | 78.3026 |
| 3      | 11.508        | BV   | 0.0658      | 1199.73914   | 281.16333    | 9.3377  |
| 4      | 12.829        | VB   | 0.0847      | 459.43491    | 85.48837     | 3.5758  |

Totals : 1.28483e4 2643.83054

Signal 5: DAD1 E, Sig=240,4 Ref=off

| Peak # | RetTime [min] | Type | Width [min] | Area [mAU*s] | Height [mAU] | Area %  |
|--------|---------------|------|-------------|--------------|--------------|---------|
| 1      | 11.085        | BV   | 0.0672      | 634.01740    | 144.39835    | 6.2688  |
| 2      | 11.247        | VV   | 0.0754      | 7837.16797   | 1593.89563   | 77.4891 |
| 3      | 11.508        | VB   | 0.0754      | 1302.56641   | 255.79105    | 12.8790 |
| 4      | 12.829        | VB   | 0.0847      | 340.14511    | 63.32522     | 3.3631  |

Totals : 1.01139e4 2057.41024

Signal 6: DAD1 F, Sig=280,16 Ref=off

| Peak # | RetTime [min] | Type | Width [min] | Area [mAU*s] | Height [mAU] | Area %  |
|--------|---------------|------|-------------|--------------|--------------|---------|
| 1      | 11.086        | BV   | 0.0671      | 158.43652    | 36.17655     | 3.0899  |
| 2      | 11.247        | VV   | 0.0748      | 4190.94482   | 860.92053    | 81.7330 |
| 3      | 11.508        | VV   | 0.0736      | 576.60266    | 116.70569    | 11.2451 |
| 4      | 12.829        | BV   | 0.0917      | 201.62273    | 33.76098     | 3.9321  |

Totals : 5127.60674 1047.56375

Signal 7: DAD1 G, Sig=300,16 Ref=off

| Peak # | RetTime [min] | Type | Width [min] | Area [mAU*s] | Height [mAU] | Area %  |
|--------|---------------|------|-------------|--------------|--------------|---------|
| 1      | 11.247        | VV   | 0.0750      | 3908.86646   | 800.75116    | 74.1305 |
| 2      | 11.508        | VB   | 0.0668      | 1175.77905   | 270.14182    | 22.2983 |
| 3      | 12.828        | BV   | 0.0913      | 188.30544    | 31.69815     | 3.5712  |

Totals : 5272.95094 1102.59113

Data File C:\CHEM32\1\DATA\LAXMAN\LD-VI-145-00002.D  
Sample Name: LD-VI-145-run2

Signal 8: DAD1 H, Sig=320,16 Ref=off

| Peak # | RetTime [min] | Type | Width [min] | Area [mAU*s] | Height [mAU] | Area %  |
|--------|---------------|------|-------------|--------------|--------------|---------|
| 1      | 11.247        | VV   | 0.0753      | 1927.66699   | 392.75601    | 53.8382 |
| 2      | 11.508        | VV   | 0.0661      | 1547.21765   | 360.35504    | 43.2126 |
| 3      | 12.829        | VV   | 0.0940      | 105.59404    | 17.09910     | 2.9492  |

Totals :                   3580.47868   770.21016

=====  
\*\*\* End of Report \*\*\*

<sup>1</sup>H NMR (CD<sub>3</sub>OD, 600 MHz) Compound **24**

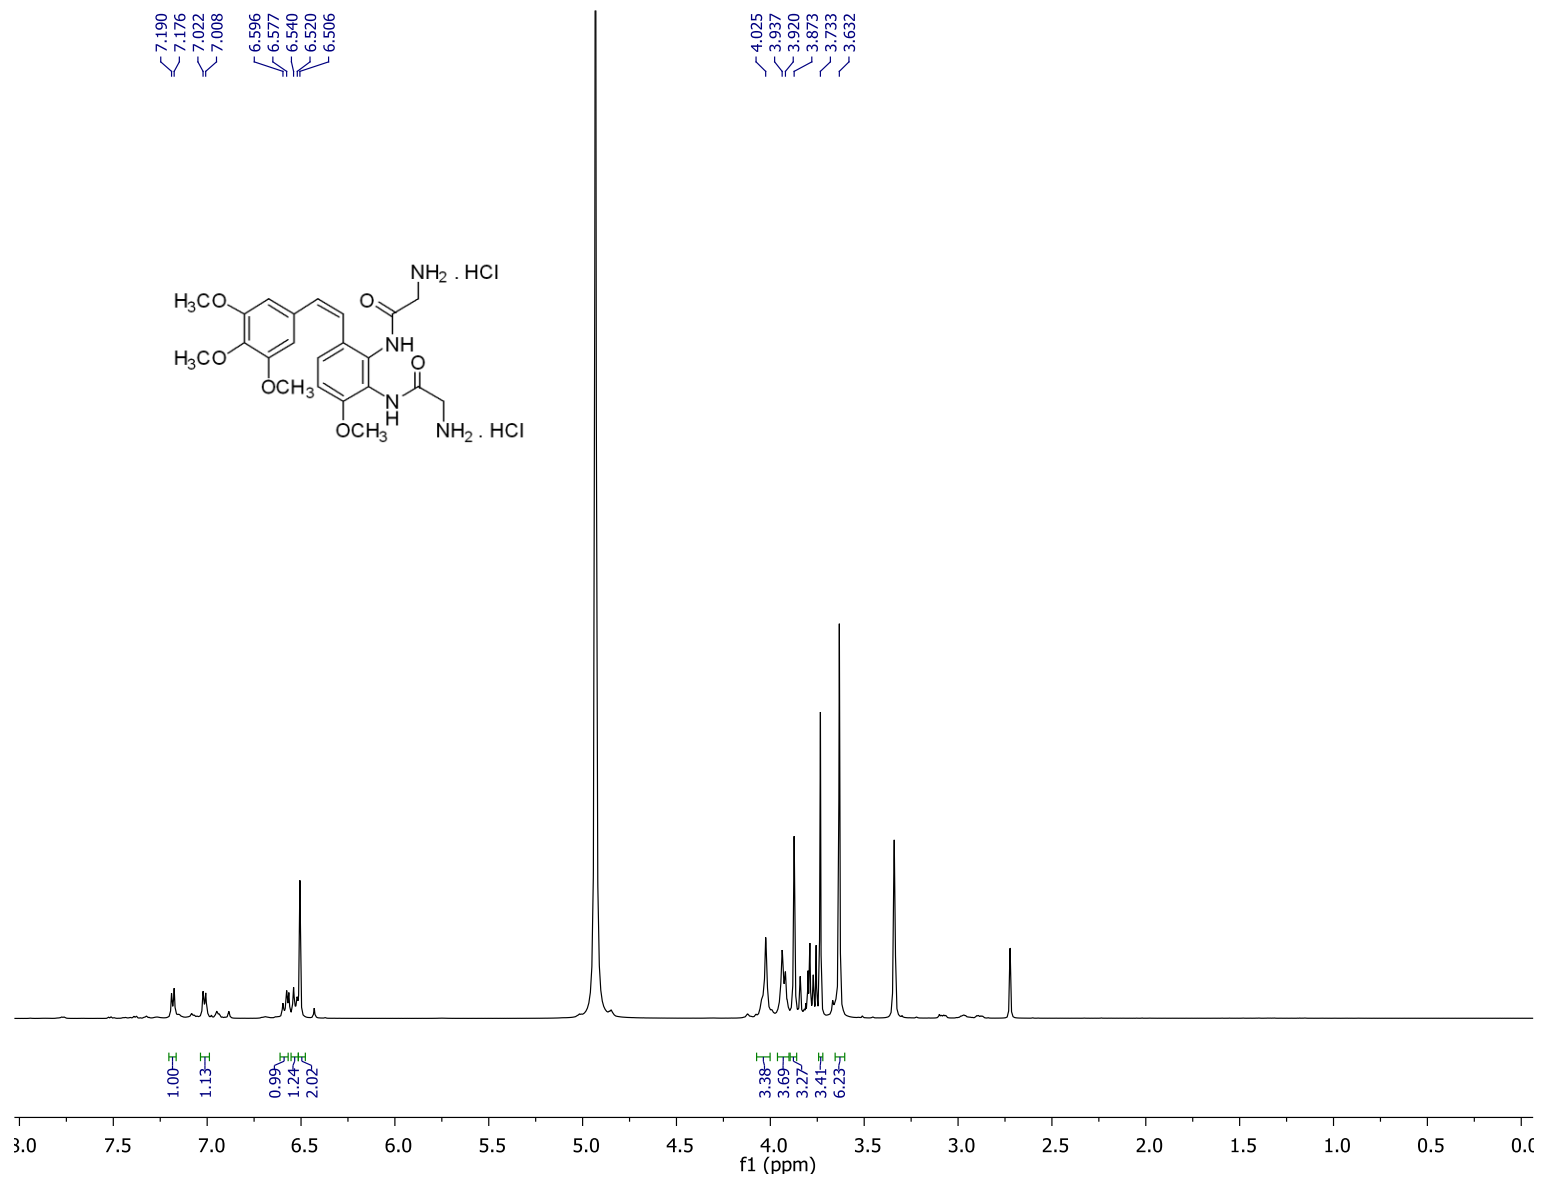

S126

<sup>13</sup>C NMR (CD<sub>3</sub>OD, 150 MHz) Compound **24**

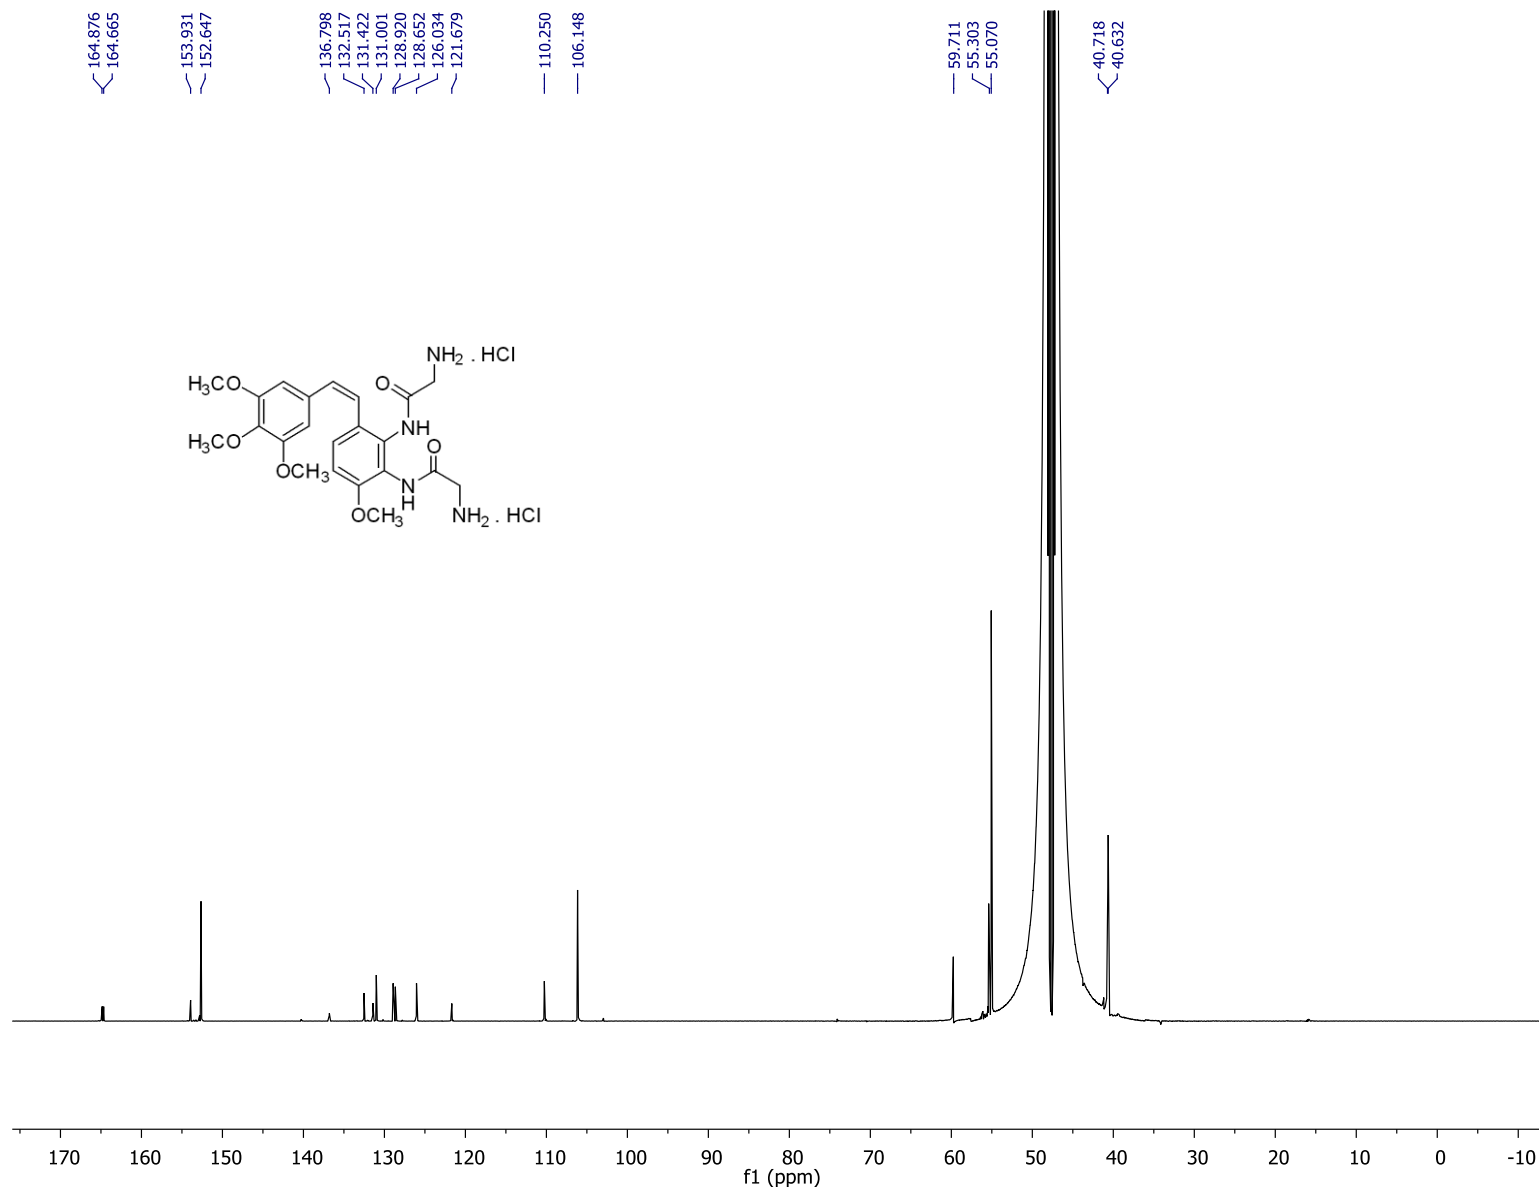

**S127**

# HRMS Compound 24

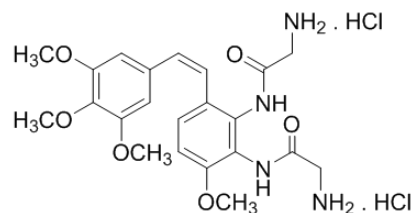

**Chemical Formula: C<sub>22</sub>H<sub>30</sub>Cl<sub>2</sub>N<sub>4</sub>O<sub>6</sub>**  
**Exact Mass: 516.1542**

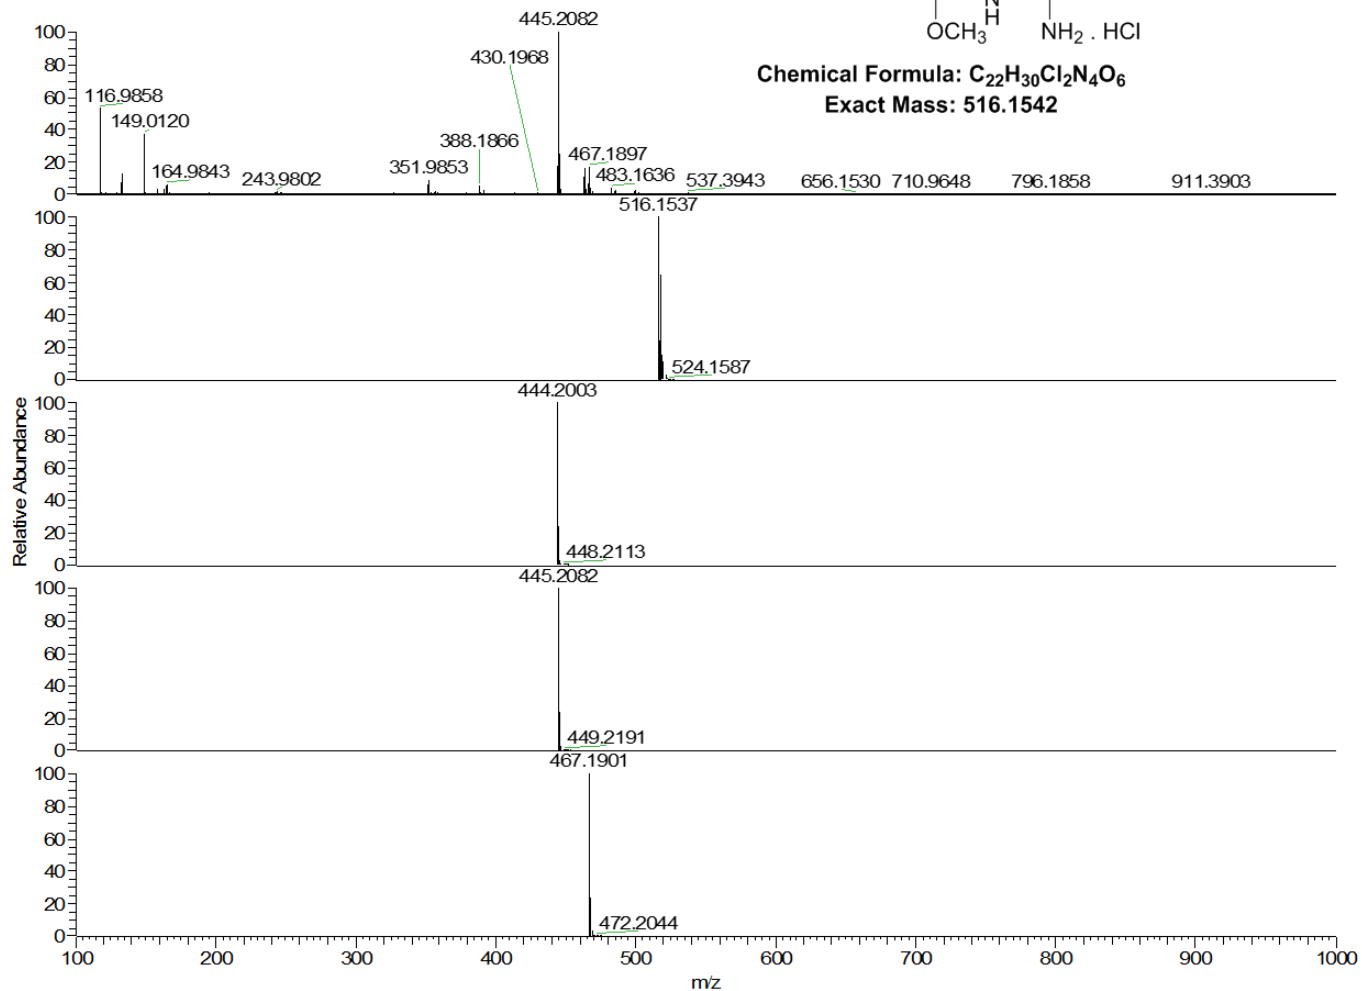

NL:  
 2.92E7  
 LD-III-21\_Orbi\_+ES#1  
 RT: 0.01 AV: 1 T:  
 FTMS + p ESIFull.ms  
 [100.00-1000.00]

NL:  
 4.39E5  
 C<sub>22</sub>H<sub>30</sub>Cl<sub>2</sub>N<sub>4</sub>O<sub>6</sub>:  
 C<sub>22</sub>H<sub>30</sub>Cl<sub>2</sub>N<sub>4</sub>O<sub>6</sub>  
 pa Chrg 1

NL:  
 7.64E5  
 C<sub>22</sub>H<sub>28</sub>N<sub>4</sub>O<sub>6</sub>:  
 C<sub>22</sub>H<sub>28</sub>N<sub>4</sub>O<sub>6</sub>  
 pa Chrg 1

NL:  
 7.64E5  
 C<sub>22</sub>H<sub>28</sub>N<sub>4</sub>O<sub>6</sub> +H:  
 C<sub>22</sub>H<sub>29</sub>N<sub>4</sub>O<sub>6</sub>  
 pa Chrg 1

NL:  
 7.64E5  
 C<sub>22</sub>H<sub>28</sub>N<sub>4</sub>O<sub>6</sub> +Na:  
 C<sub>22</sub>H<sub>28</sub>N<sub>4</sub>O<sub>6</sub>Na<sub>1</sub>  
 pa Chrg 1



# HPLC for Compound 24

Data File C:\CHEM32\1\DATA\LAXMAN\LD-III-21\RUN1-III-21-0001.D

Sample Name: run1-LD-III-21-1A

```
=====
Acq. Operator   : Laxman
Acq. Instrument : Instrument 1                Location : -
Injection Date  : 12/21/2012 11:37:50 AM
Acq. Method    : C:\CHEM32\1\METHODS\MASTERMETHOD.M
Last changed   : 12/21/2012 11:34:21 AM by Laxman
Analysis Method: C:\CHEM32\1\DATA\LAXMAN\LD-III-21\RUN1-III-21-0001.D\DA.M (MASTERMETHOD.M)
Last changed   : 1/18/2013 10:56:37 AM by song
                (modified after loading)
Sample Info    : run1
                10%ACN in 0.1%TFA water solution
```

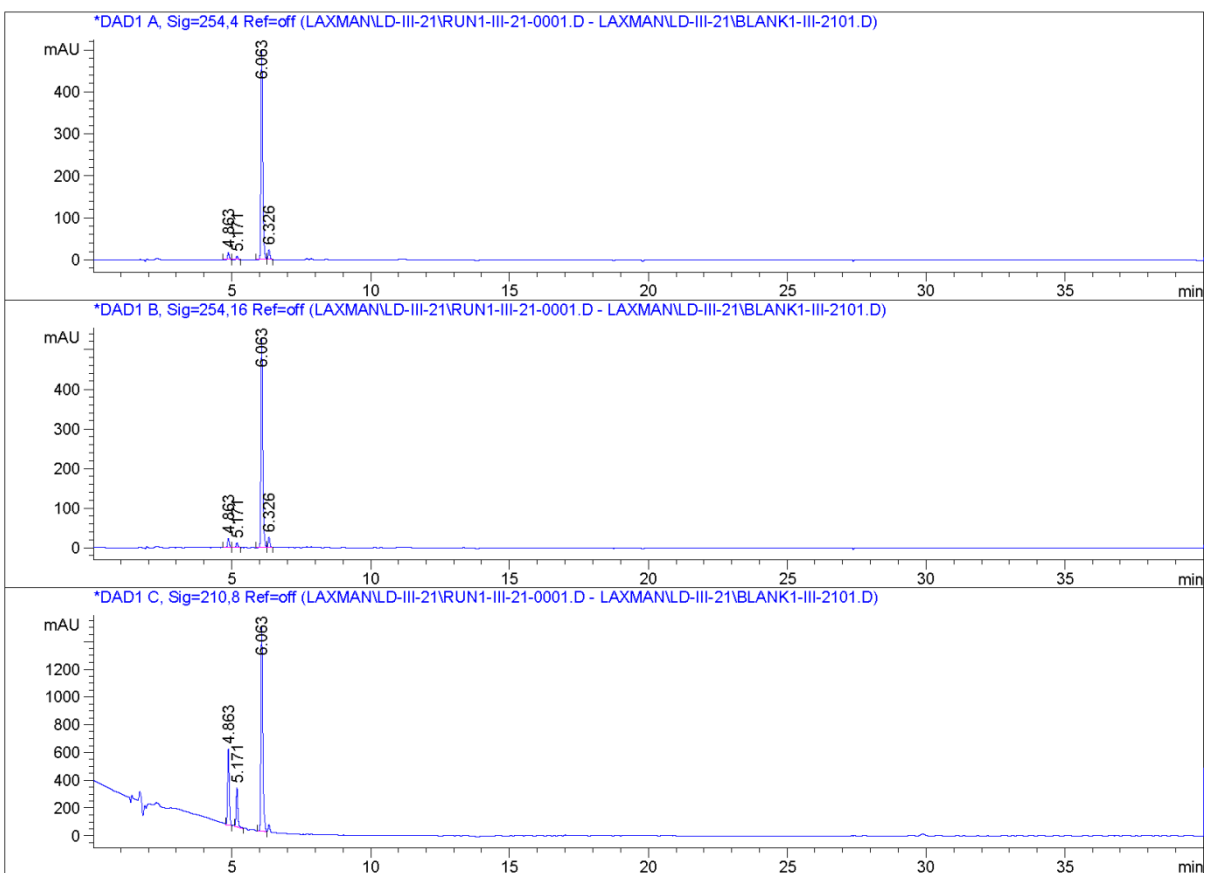

Data File C:\CHEM32\1\DATA\LAXMAN\LD-III-21\RUN1-III-21-0001.D  
Sample Name: run1-LD-III-21-1A

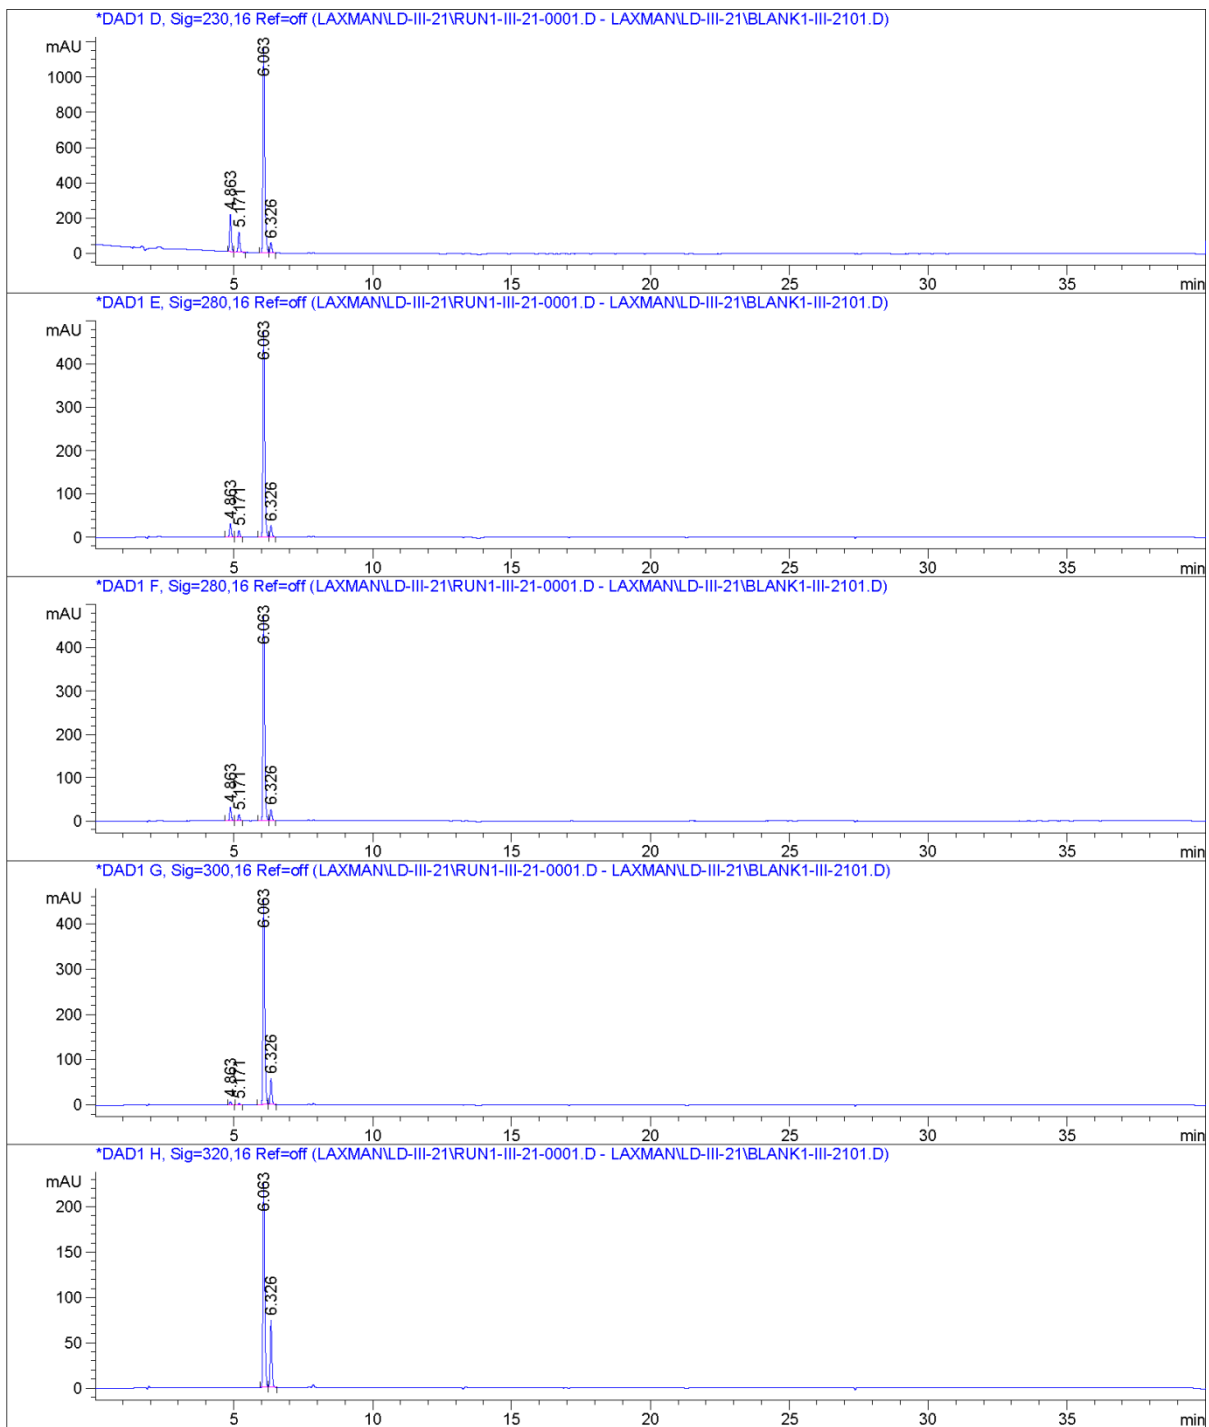

=====  
Area Percent Report  
=====

Sorted By : Signal  
Multiplier : 1.0000  
Dilution : 1.0000  
Use Multiplier & Dilution Factor with ISTDs

Signal 1: DAD1 A, Sig=254,4 Ref=off  
Signal has been modified after loading from rawdata file!

| Peak #   | RetTime [min] | Type | Width [min] | Area [mAU*s] | Height [mAU] | Area %  |
|----------|---------------|------|-------------|--------------|--------------|---------|
| 1        | 4.863         | BB   | 0.0643      | 71.16022     | 17.17359     | 2.8439  |
| 2        | 5.171         | BB   | 0.0645      | 37.81452     | 9.08890      | 1.5113  |
| 3        | 6.063         | BV   | 0.0693      | 2286.42432   | 500.08197    | 91.3767 |
| 4        | 6.326         | VB   | 0.0649      | 106.79793    | 24.49240     | 4.2682  |
| Totals : |               |      |             | 2502.19698   | 550.83686    |         |

Signal 2: DAD1 B, Sig=254,16 Ref=off  
Signal has been modified after loading from rawdata file!

| Peak #   | RetTime [min] | Type | Width [min] | Area [mAU*s] | Height [mAU] | Area %  |
|----------|---------------|------|-------------|--------------|--------------|---------|
| 1        | 4.863         | BB   | 0.0642      | 98.68317     | 23.90006     | 3.6702  |
| 2        | 5.171         | BB   | 0.0639      | 50.66319     | 12.33097     | 1.8843  |
| 3        | 6.063         | BV   | 0.0694      | 2422.45068   | 529.47382    | 90.0960 |
| 4        | 6.326         | VB   | 0.0648      | 116.94734    | 26.84951     | 4.3495  |
| Totals : |               |      |             | 2688.74438   | 592.55435    |         |

Signal 3: DAD1 C, Sig=210,8 Ref=off  
Signal has been modified after loading from rawdata file!

| Peak #   | RetTime [min] | Type | Width [min] | Area [mAU*s] | Height [mAU] | Area %  |
|----------|---------------|------|-------------|--------------|--------------|---------|
| 1        | 4.863         | VB   | 0.0650      | 2312.86865   | 551.00055    | 21.8635 |
| 2        | 5.171         | VV   | 0.0671      | 1246.27808   | 284.80121    | 11.7810 |
| 3        | 6.063         | BV   | 0.0732      | 7019.53174   | 1483.43799   | 66.3555 |
| Totals : |               |      |             | 1.05787e4    | 2319.23975   |         |

Data File C:\CHEM32\1\DATA\LAXMAN\LD-III-21\RUN1-III-21-0001.D  
Sample Name: run1-LD-III-21-1A

Signal 4: DAD1 D, Sig=230,16 Ref=off  
Signal has been modified after loading from rawdata file!

| Peak # | RetTime [min] | Type | Width [min] | Area [mAU*s] | Height [mAU] | Area %  |
|--------|---------------|------|-------------|--------------|--------------|---------|
| 1      | 4.863         | VV   | 0.0648      | 884.47058    | 211.53062    | 12.5062 |
| 2      | 5.171         | VV   | 0.0674      | 505.99442    | 114.94447    | 7.1546  |
| 3      | 6.063         | BV   | 0.0721      | 5426.37646   | 1169.56604   | 76.7275 |
| 4      | 6.326         | VB   | 0.0645      | 255.42552    | 59.02868     | 3.6116  |

Totals : 7072.26698 1555.06981

Signal 5: DAD1 E, Sig=280,16 Ref=off  
Signal has been modified after loading from rawdata file!

| Peak # | RetTime [min] | Type | Width [min] | Area [mAU*s] | Height [mAU] | Area %  |
|--------|---------------|------|-------------|--------------|--------------|---------|
| 1      | 4.863         | BB   | 0.0643      | 129.42253    | 31.24761     | 5.2490  |
| 2      | 5.171         | BB   | 0.0635      | 60.69393     | 14.92229     | 2.4616  |
| 3      | 6.063         | BV   | 0.0688      | 2160.37939   | 477.03757    | 87.6182 |
| 4      | 6.326         | VB   | 0.0654      | 115.17860    | 26.14397     | 4.6713  |

Totals : 2465.67446 549.35143

Signal 6: DAD1 F, Sig=280,16 Ref=off  
Signal has been modified after loading from rawdata file!

| Peak # | RetTime [min] | Type | Width [min] | Area [mAU*s] | Height [mAU] | Area %  |
|--------|---------------|------|-------------|--------------|--------------|---------|
| 1      | 4.863         | BB   | 0.0643      | 129.42253    | 31.24761     | 5.2490  |
| 2      | 5.171         | BB   | 0.0635      | 60.69393     | 14.92229     | 2.4616  |
| 3      | 6.063         | BV   | 0.0688      | 2160.37939   | 477.03757    | 87.6182 |
| 4      | 6.326         | VB   | 0.0654      | 115.17860    | 26.14397     | 4.6713  |

Totals : 2465.67446 549.35143

Signal 7: DAD1 G, Sig=300,16 Ref=off  
Signal has been modified after loading from rawdata file!

Data File C:\CHEM32\1\DATA\LAXMAN\LD-III-21\RUN1-III-21-0001.D  
Sample Name: run1-LD-III-21-1A

| Peak #   | RetTime [min] | Type | Width [min] | Area [mAU*s] | Height [mAU] | Area %  |
|----------|---------------|------|-------------|--------------|--------------|---------|
| 1        | 4.863         | BB   | 0.0639      | 28.77723     | 7.00664      | 1.2205  |
| 2        | 5.171         | BB   | 0.0640      | 11.33881     | 2.75776      | 0.4809  |
| 3        | 6.063         | BV   | 0.0709      | 2067.91895   | 455.82397    | 87.7011 |
| 4        | 6.326         | VB   | 0.0640      | 249.88266    | 58.33168     | 10.5976 |
| Totals : |               |      |             | 2357.91764   | 523.92005    |         |

Signal 8: DAD1 H, Sig=320,16 Ref=off  
Signal has been modified after loading from rawdata file!

| Peak #   | RetTime [min] | Type | Width [min] | Area [mAU*s] | Height [mAU] | Area %  |
|----------|---------------|------|-------------|--------------|--------------|---------|
| 1        | 6.063         | BV   | 0.0706      | 1020.73212   | 226.40169    | 76.5450 |
| 2        | 6.326         | VB   | 0.0635      | 312.77420    | 73.71690     | 23.4550 |
| Totals : |               |      |             | 1333.50632   | 300.11858    |         |

=====  
\*\*\* End of Report \*\*\*

<sup>1</sup>H NMR (CDCl<sub>3</sub>, 600 MHz) Compound **25**

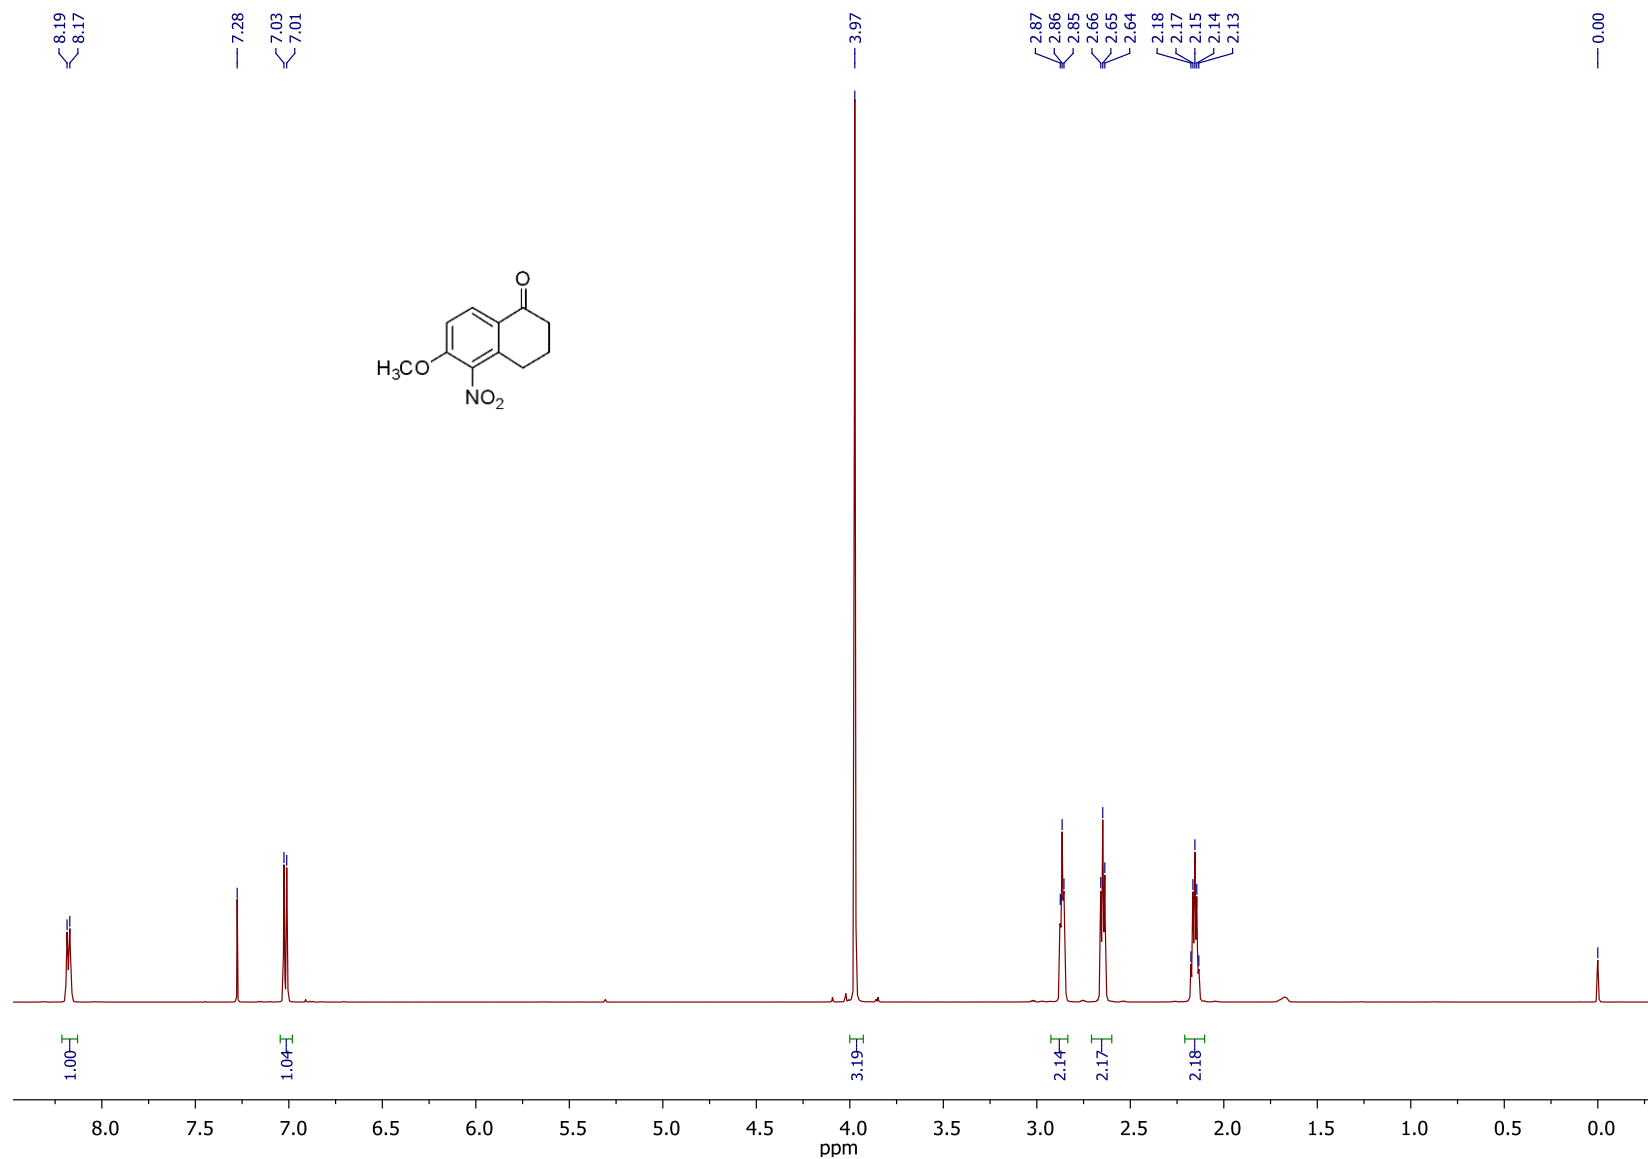

<sup>13</sup>C NMR (CDCl<sub>3</sub>, 150 MHz) Compound **25**

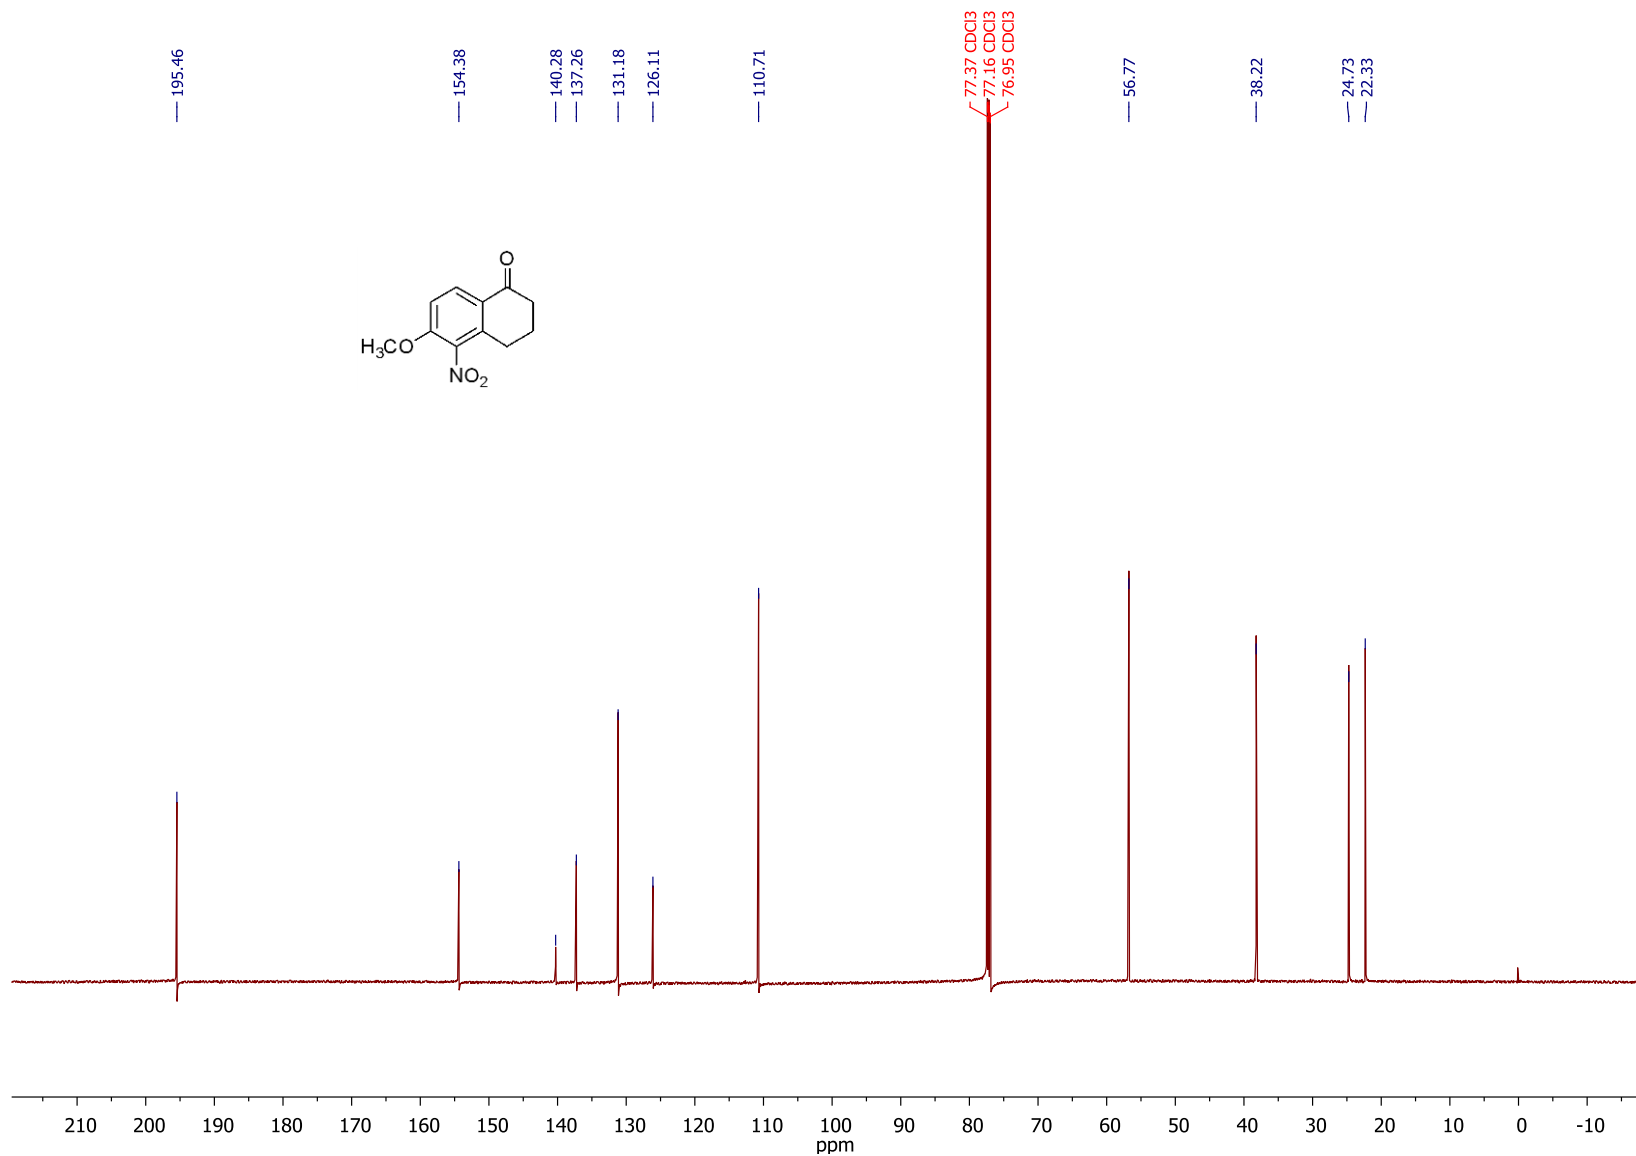

S135

<sup>1</sup>H NMR (CDCl<sub>3</sub>, 500 MHz) Compound 27

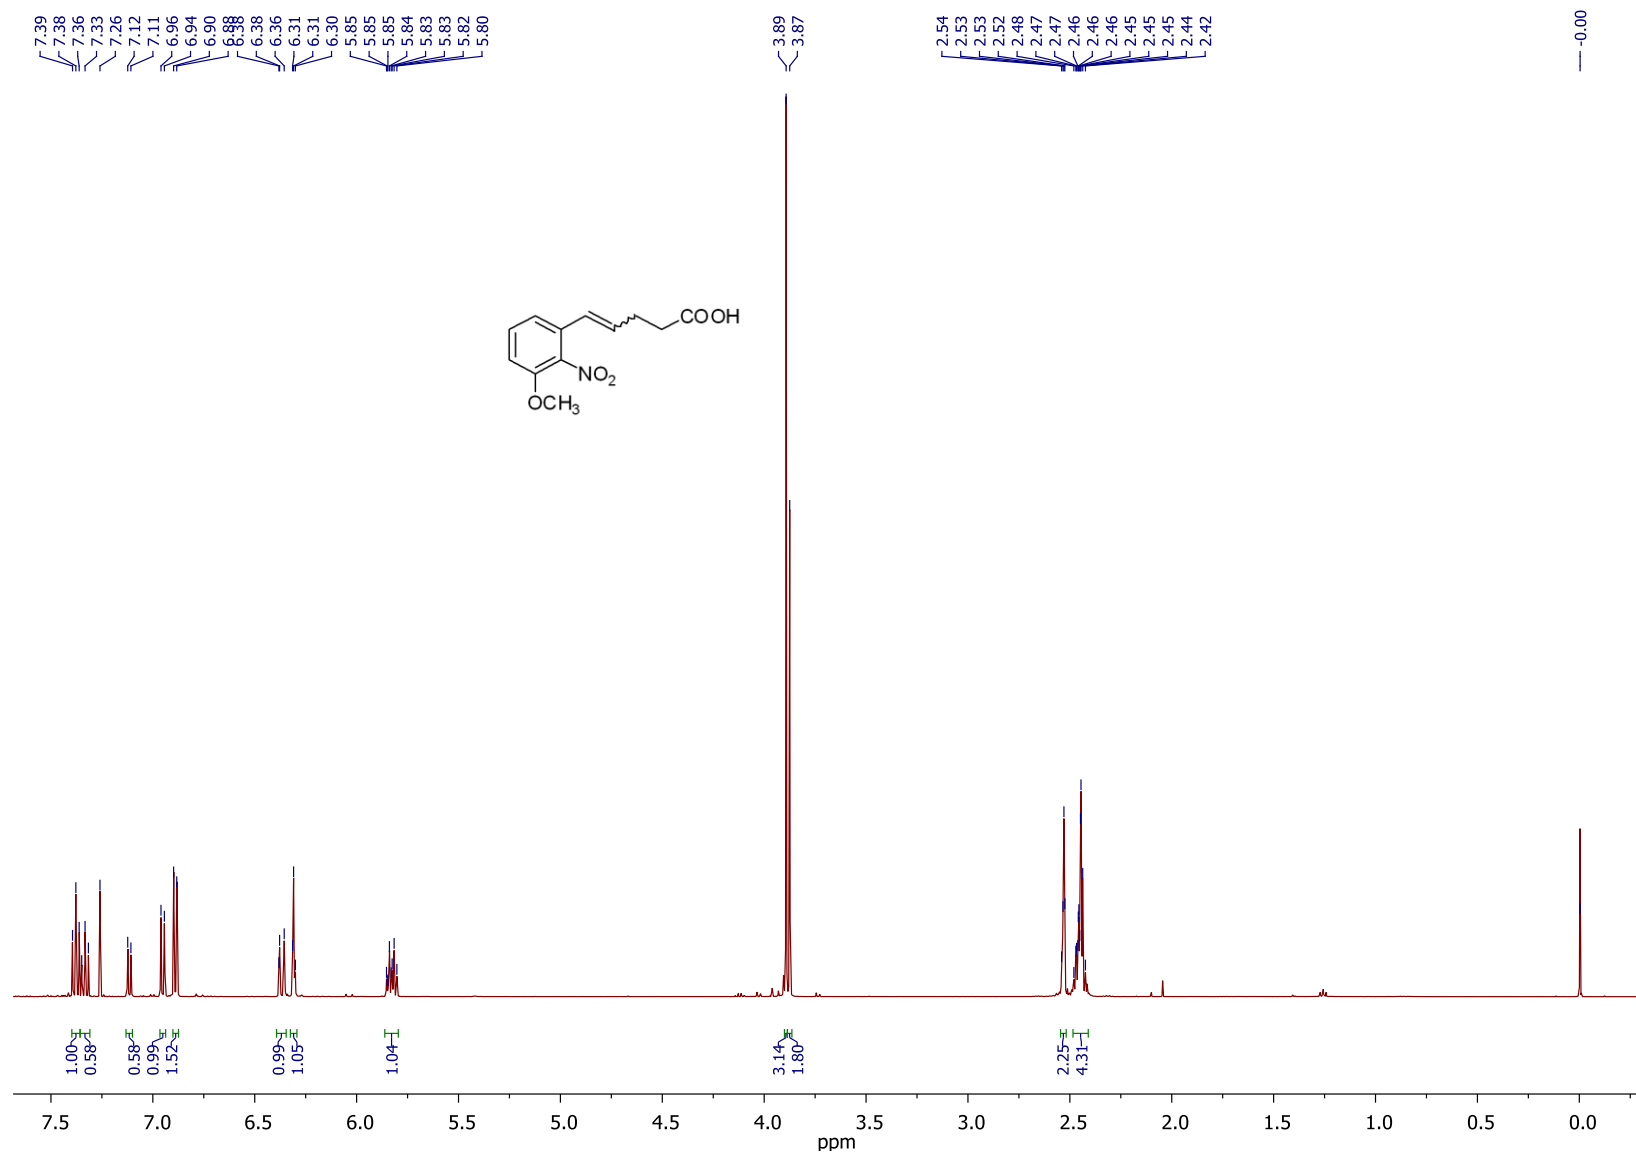



<sup>13</sup>C NMR (CDCl<sub>3</sub>, 125 MHz) Compound **27**

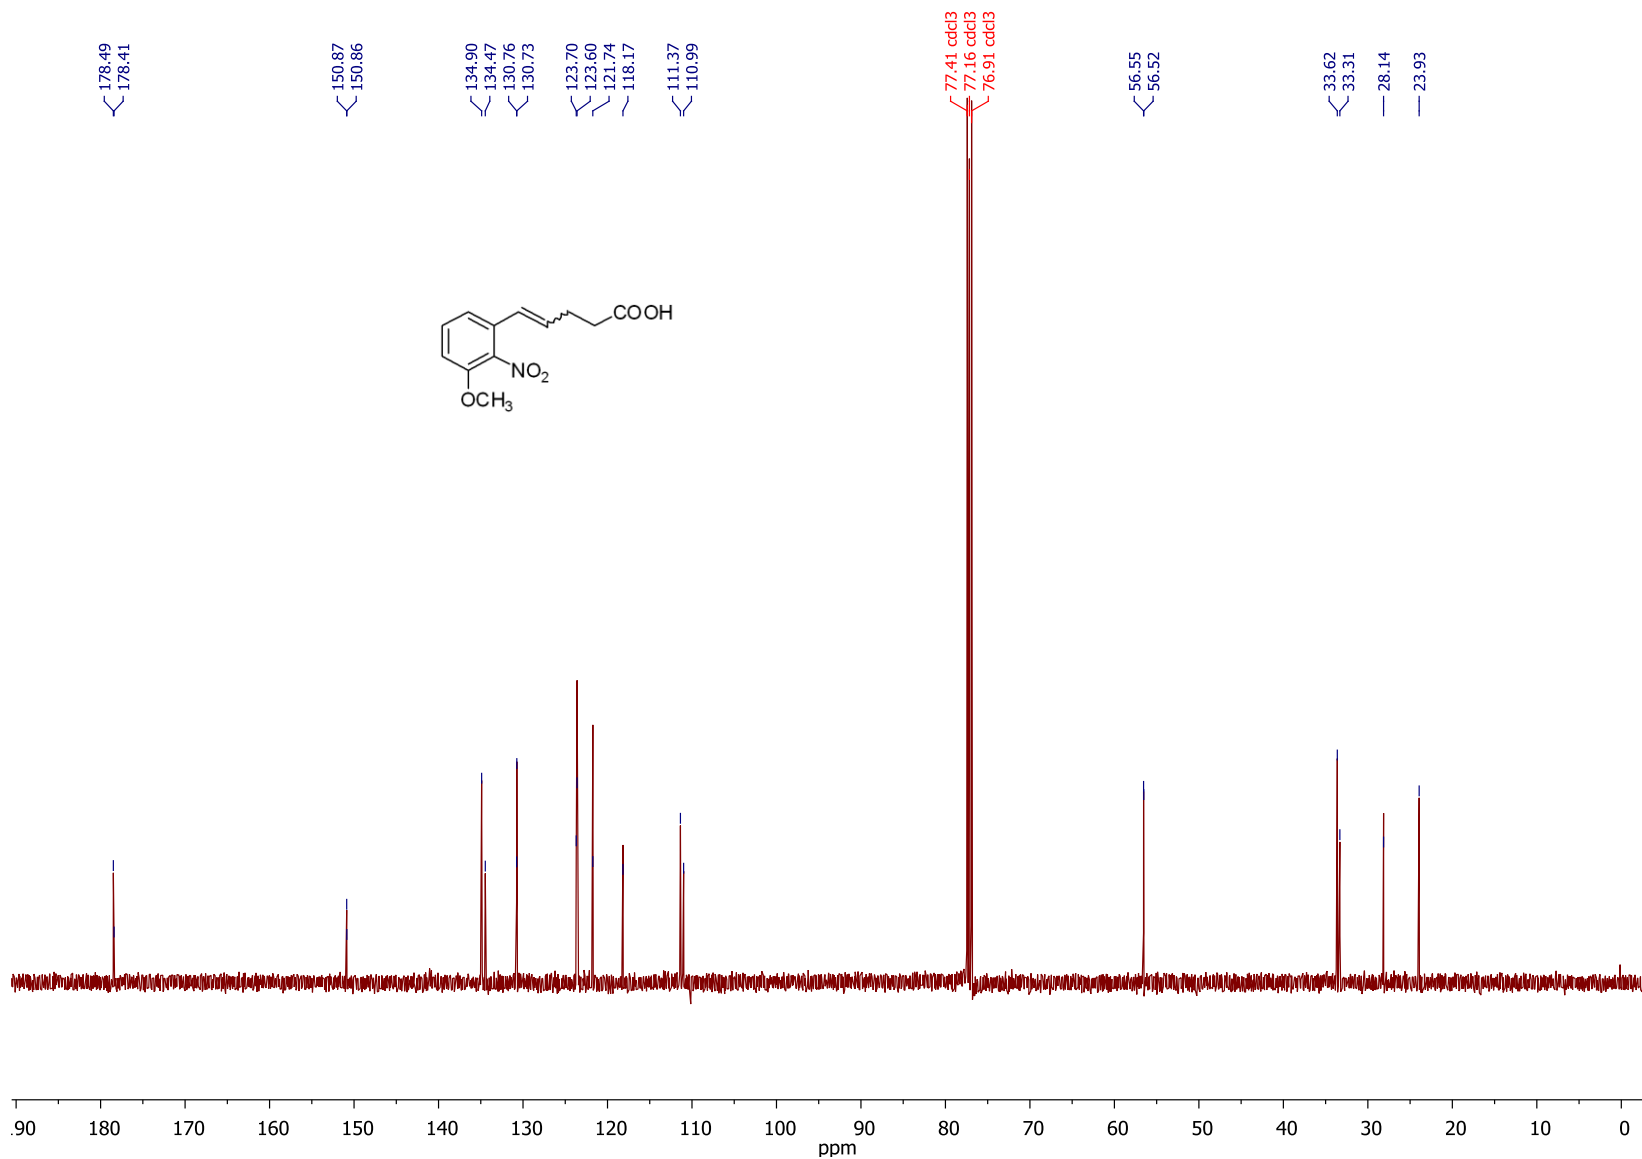

<sup>1</sup>H NMR (CDCl<sub>3</sub>, 500 MHz) Compound 28

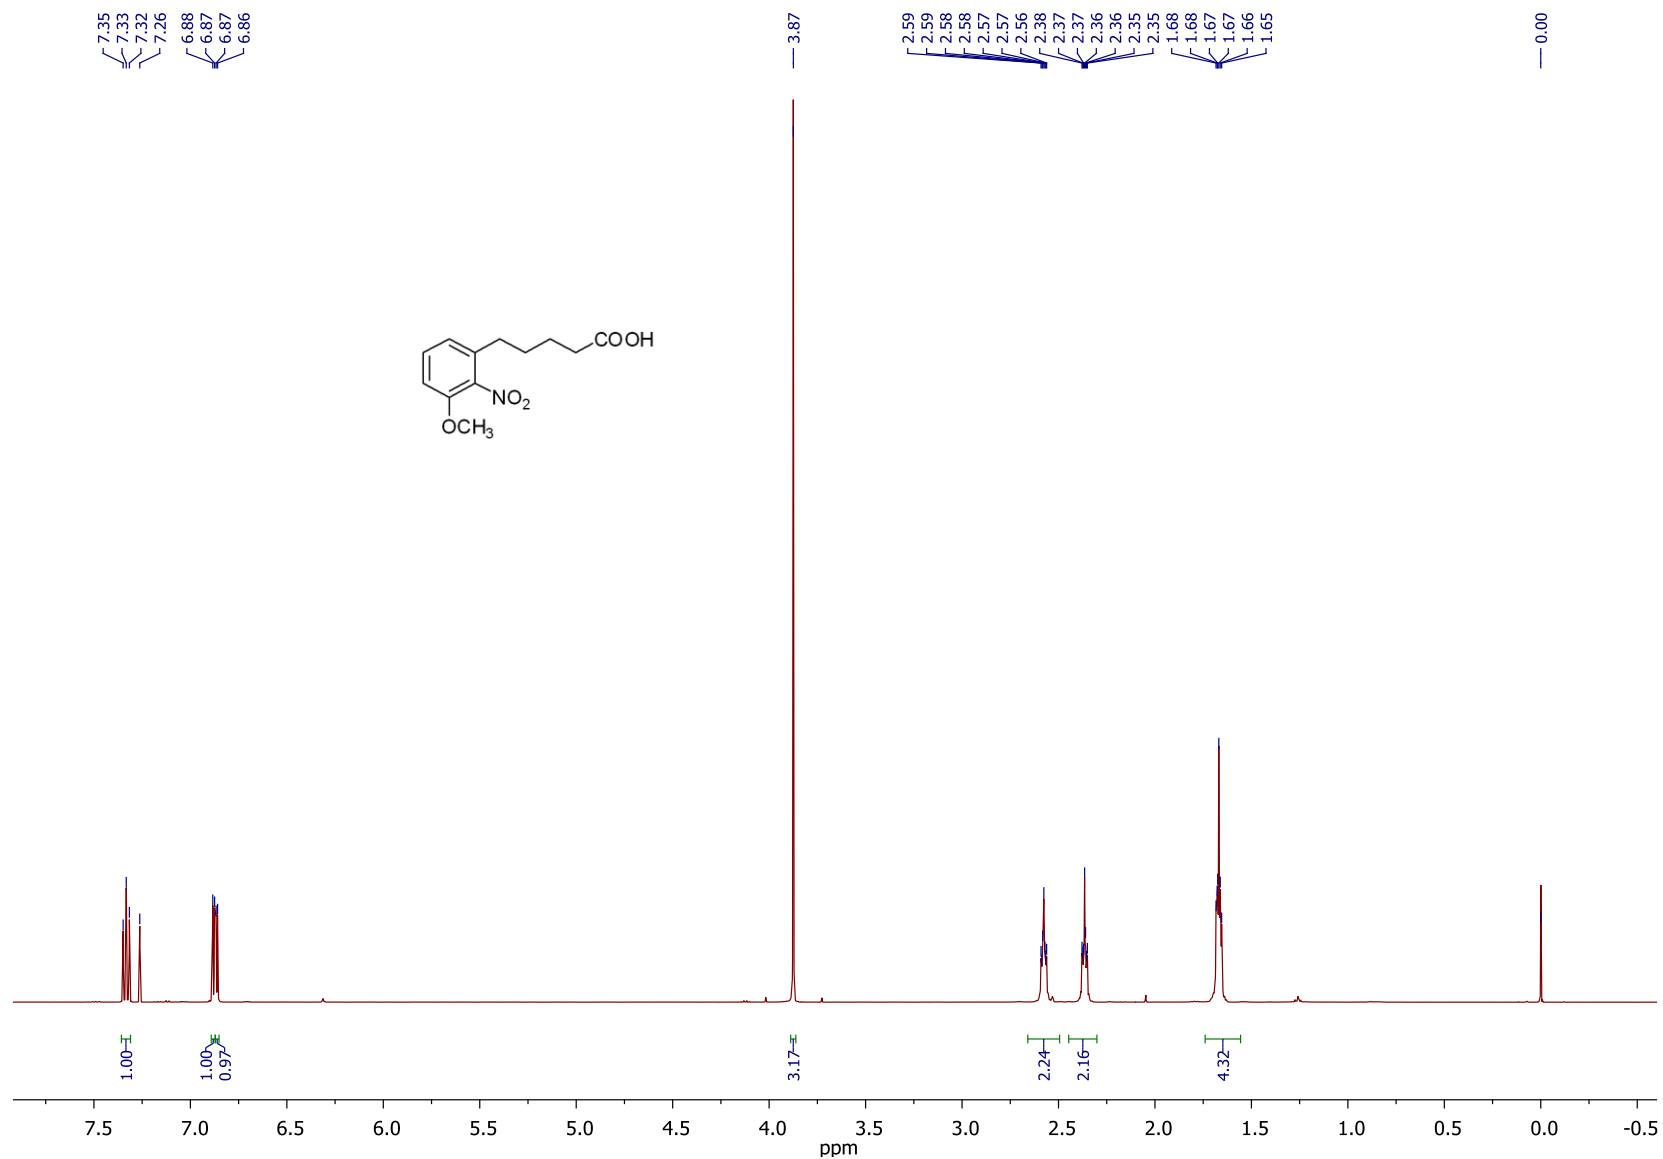

S138

$^{13}\text{C}$  NMR ( $\text{CDCl}_3$ , 125 MHz) Compound **28**

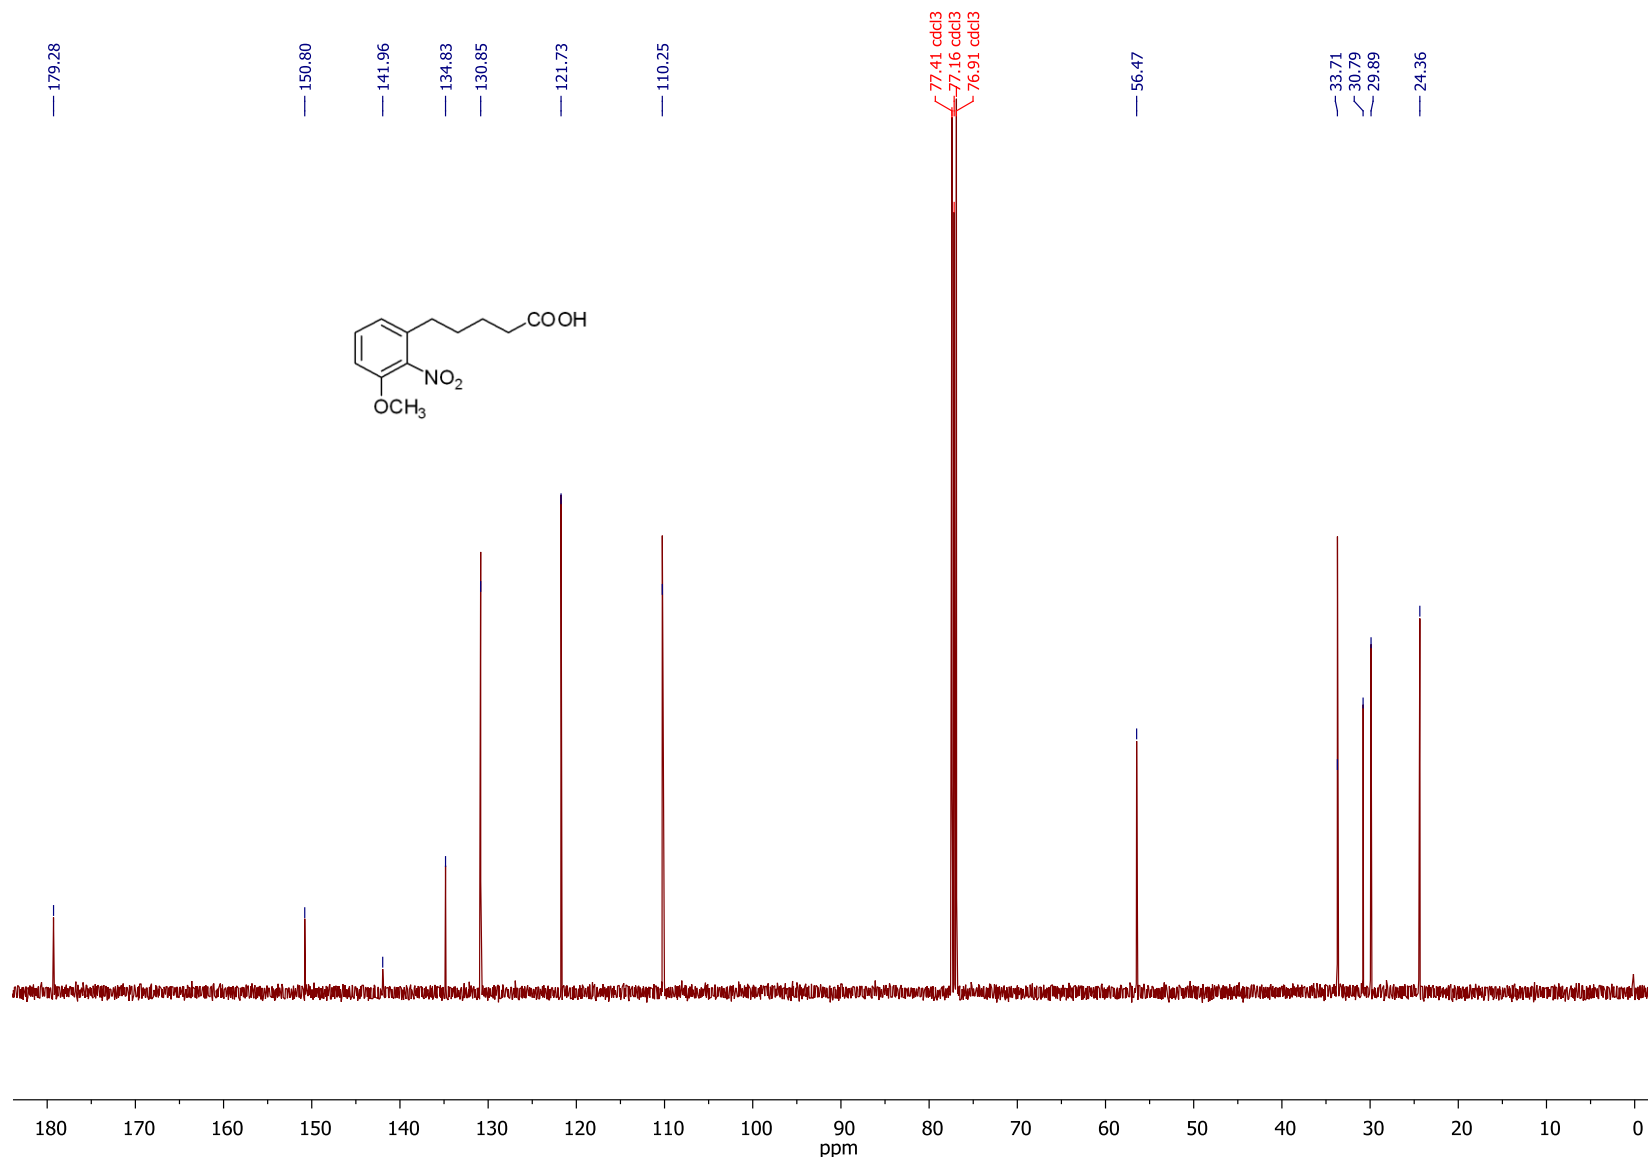

<sup>1</sup>H NMR (CDCl<sub>3</sub>, 500 MHz) Compound **29**

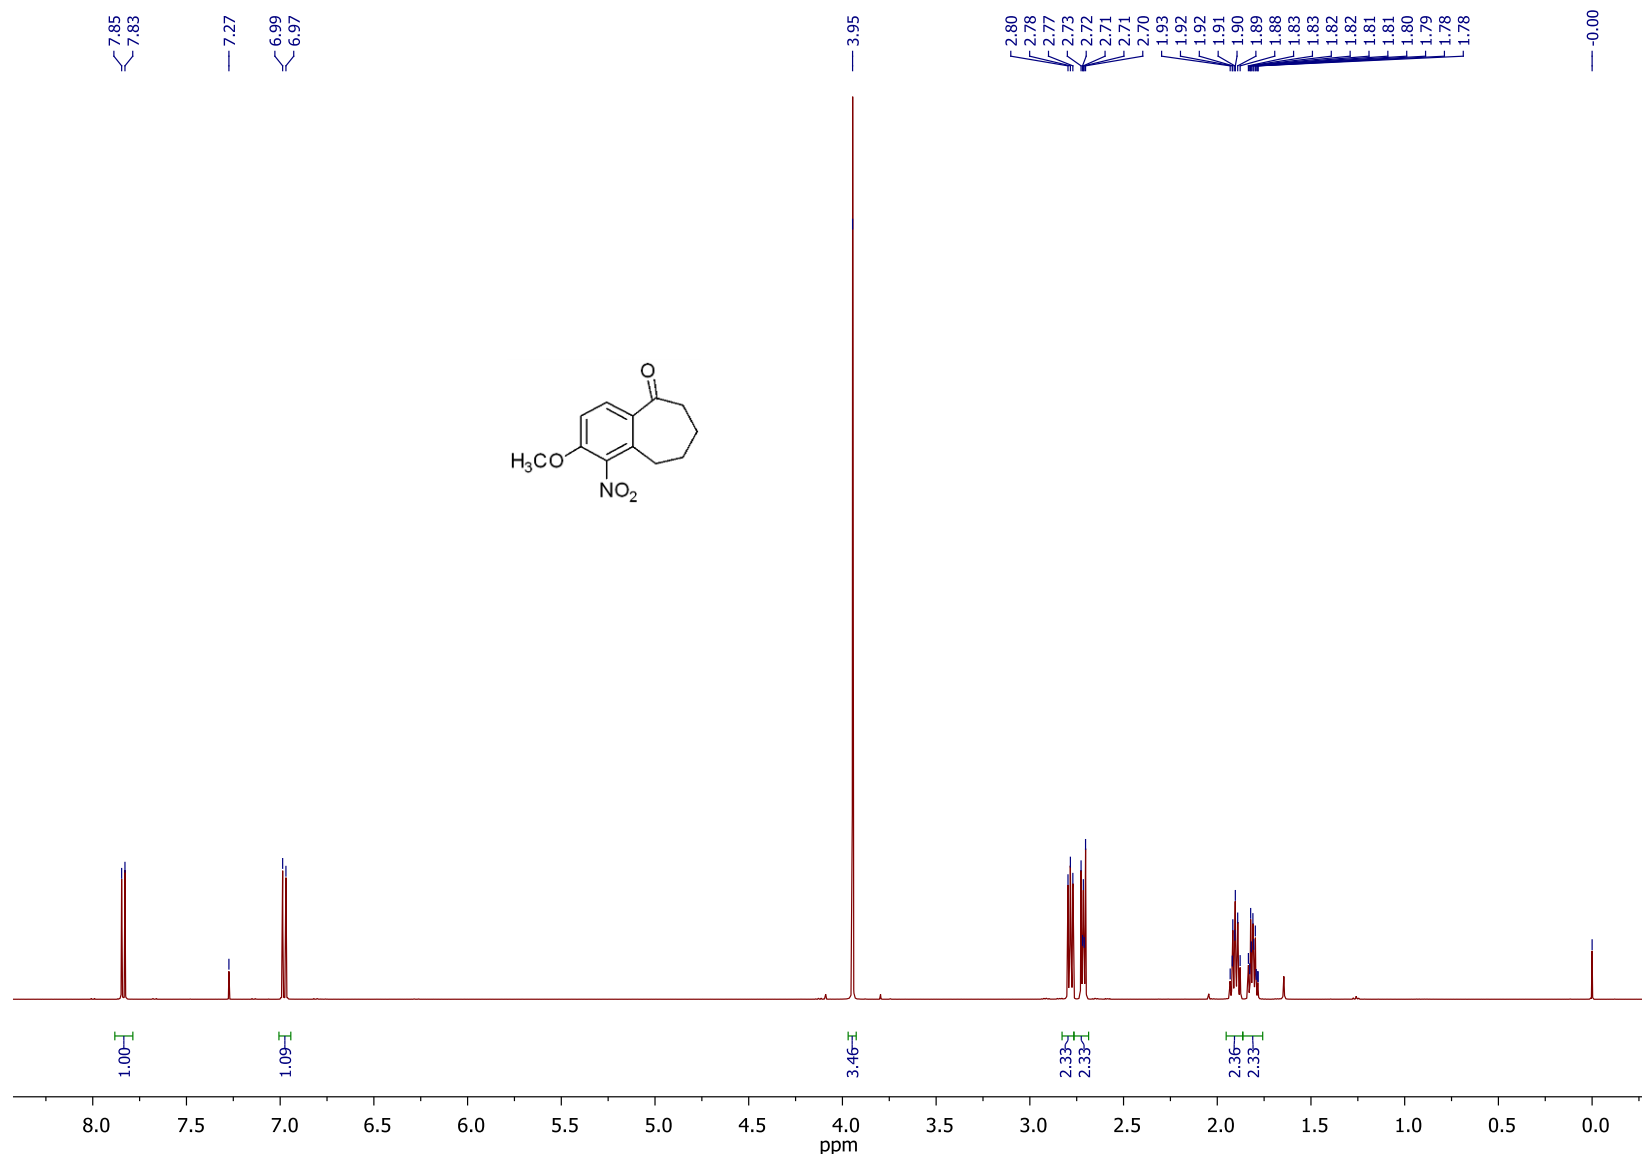

<sup>13</sup>C NMR (CDCl<sub>3</sub>, 125 MHz) Compound **29**

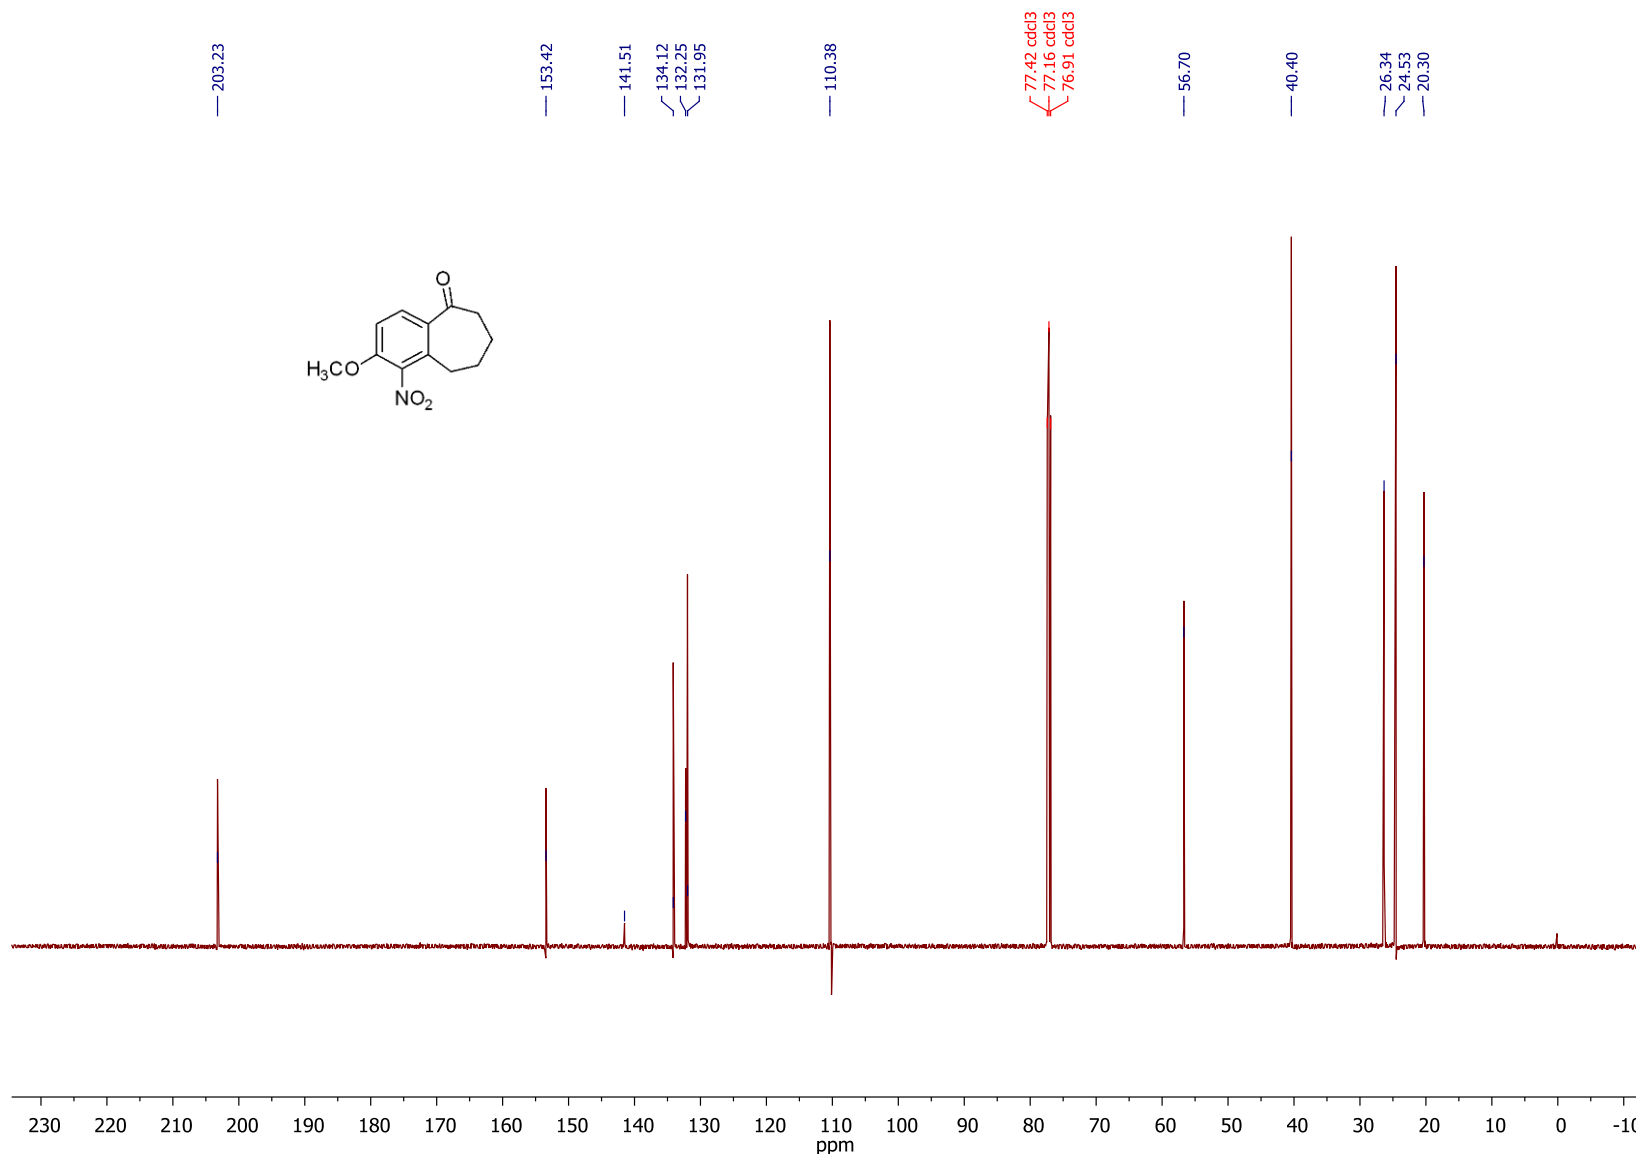

<sup>1</sup>H NMR (CDCl<sub>3</sub>, 500 MHz) Compound **30**

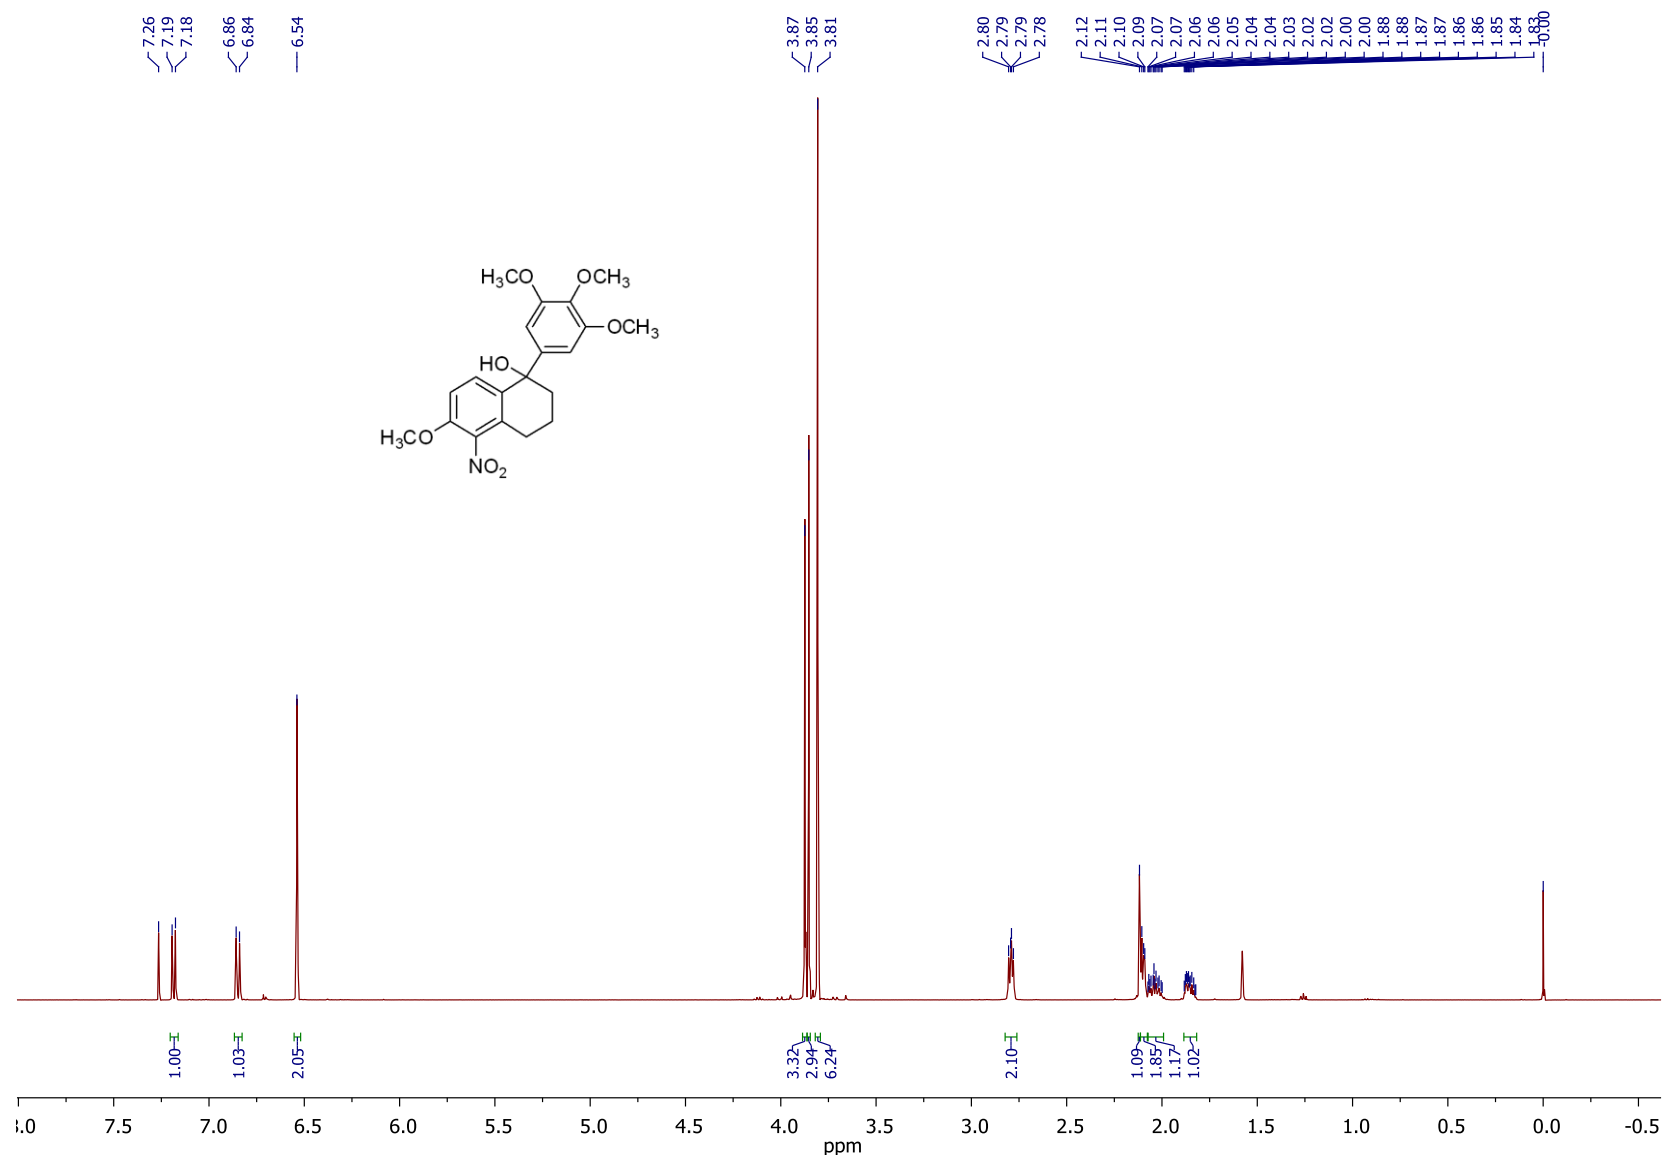

$^{13}\text{C}$  NMR ( $\text{CDCl}_3$ , 125 MHz) Compound **30**

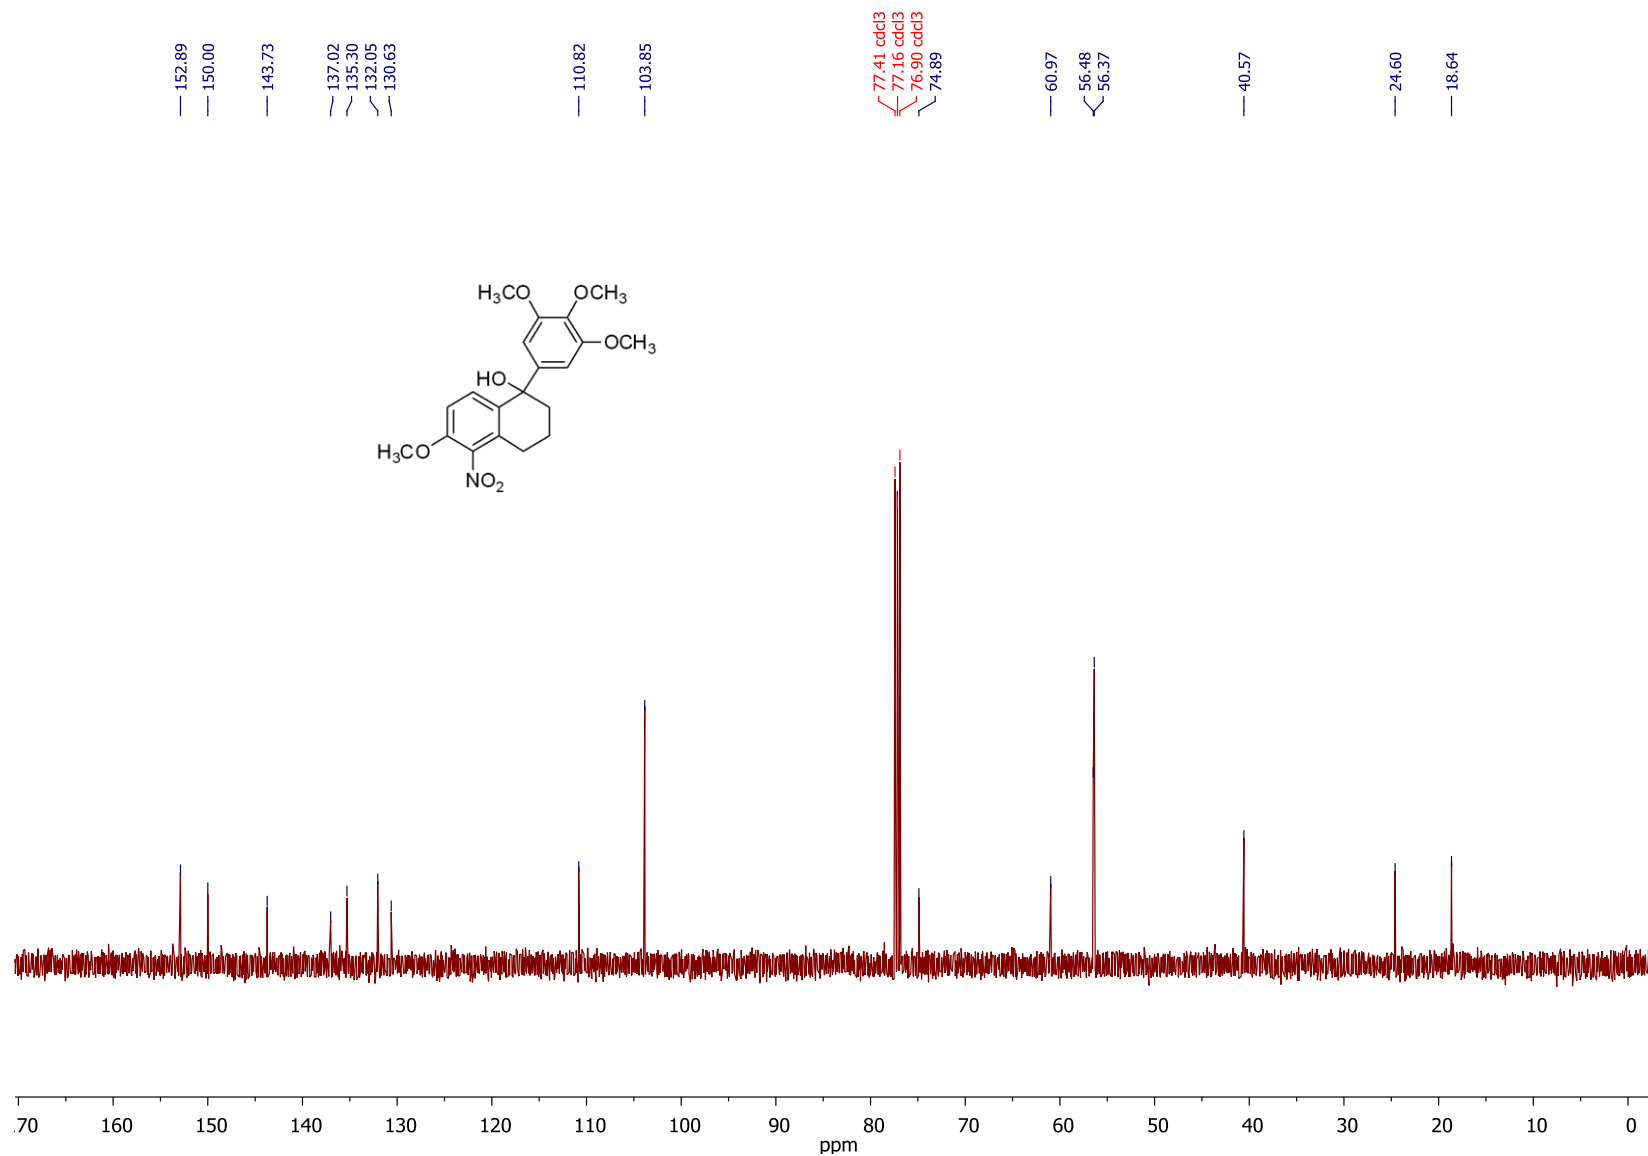

<sup>1</sup>H NMR (CDCl<sub>3</sub>, 500 MHz) Compound 31

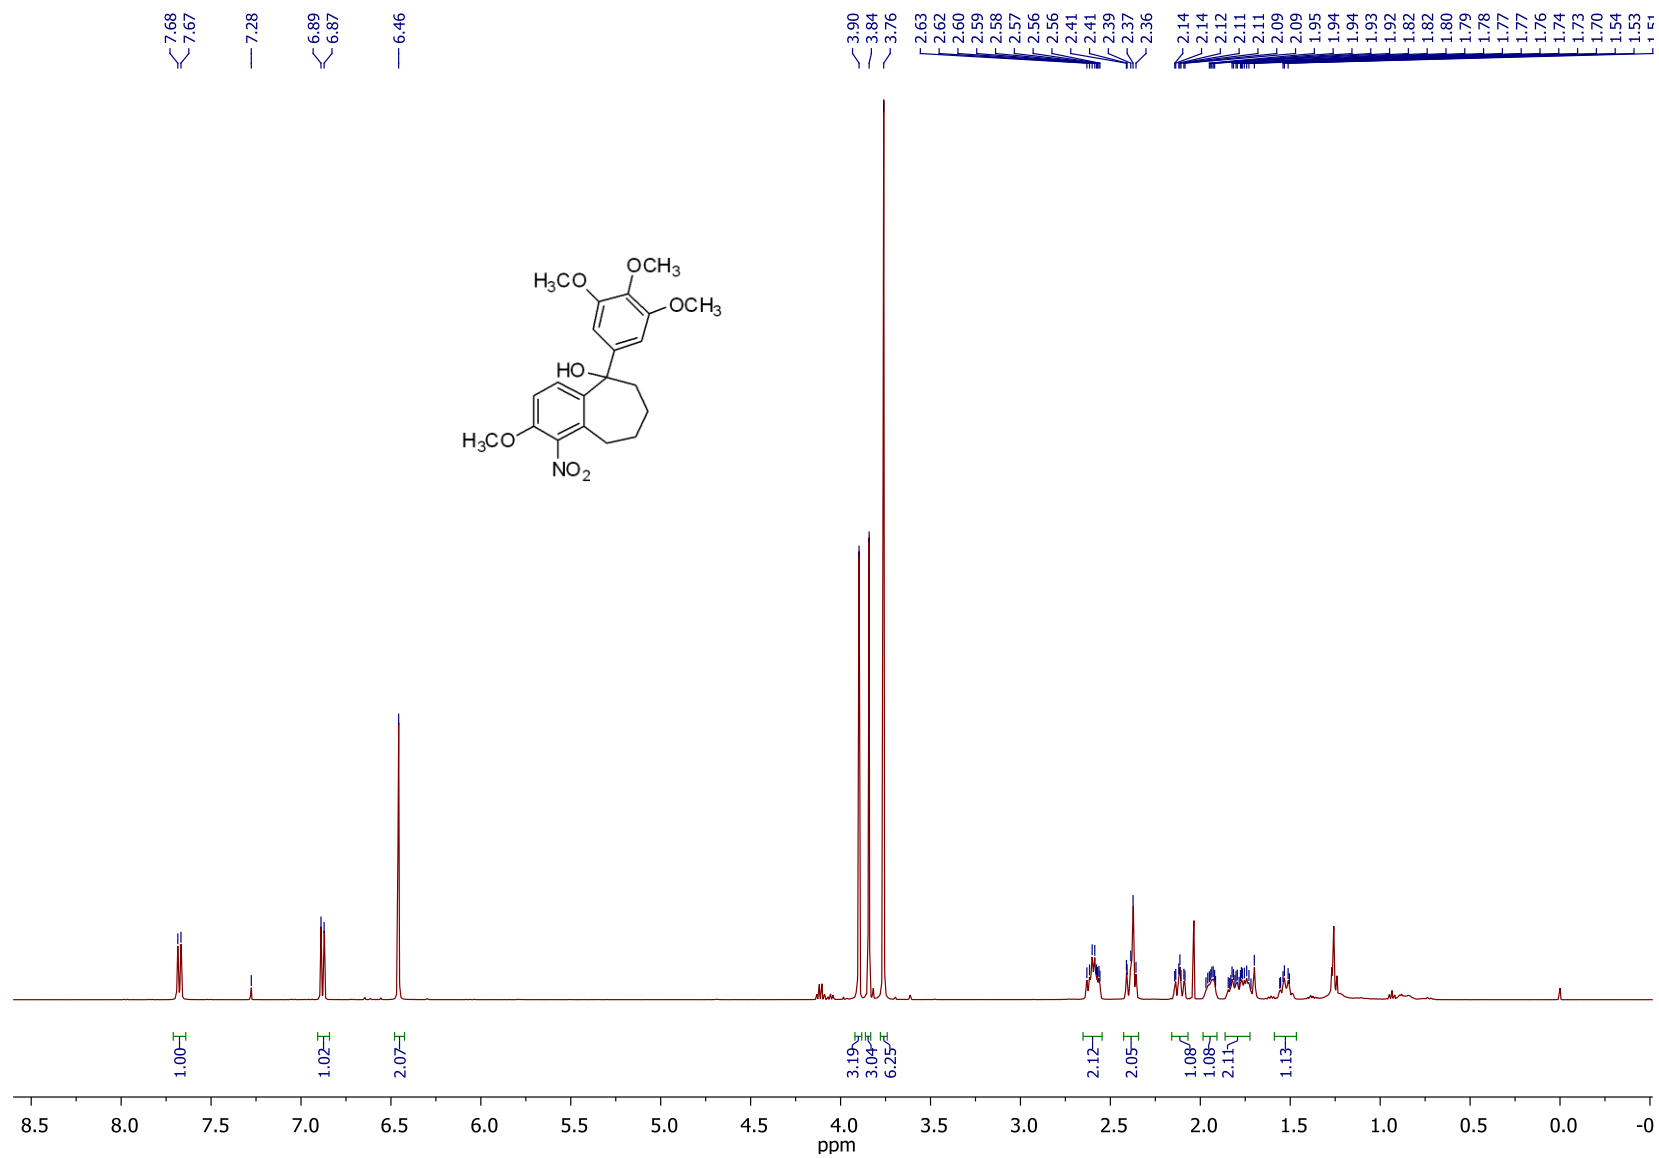



<sup>13</sup>C NMR (CDCl<sub>3</sub>, 125 MHz) Compound **31**

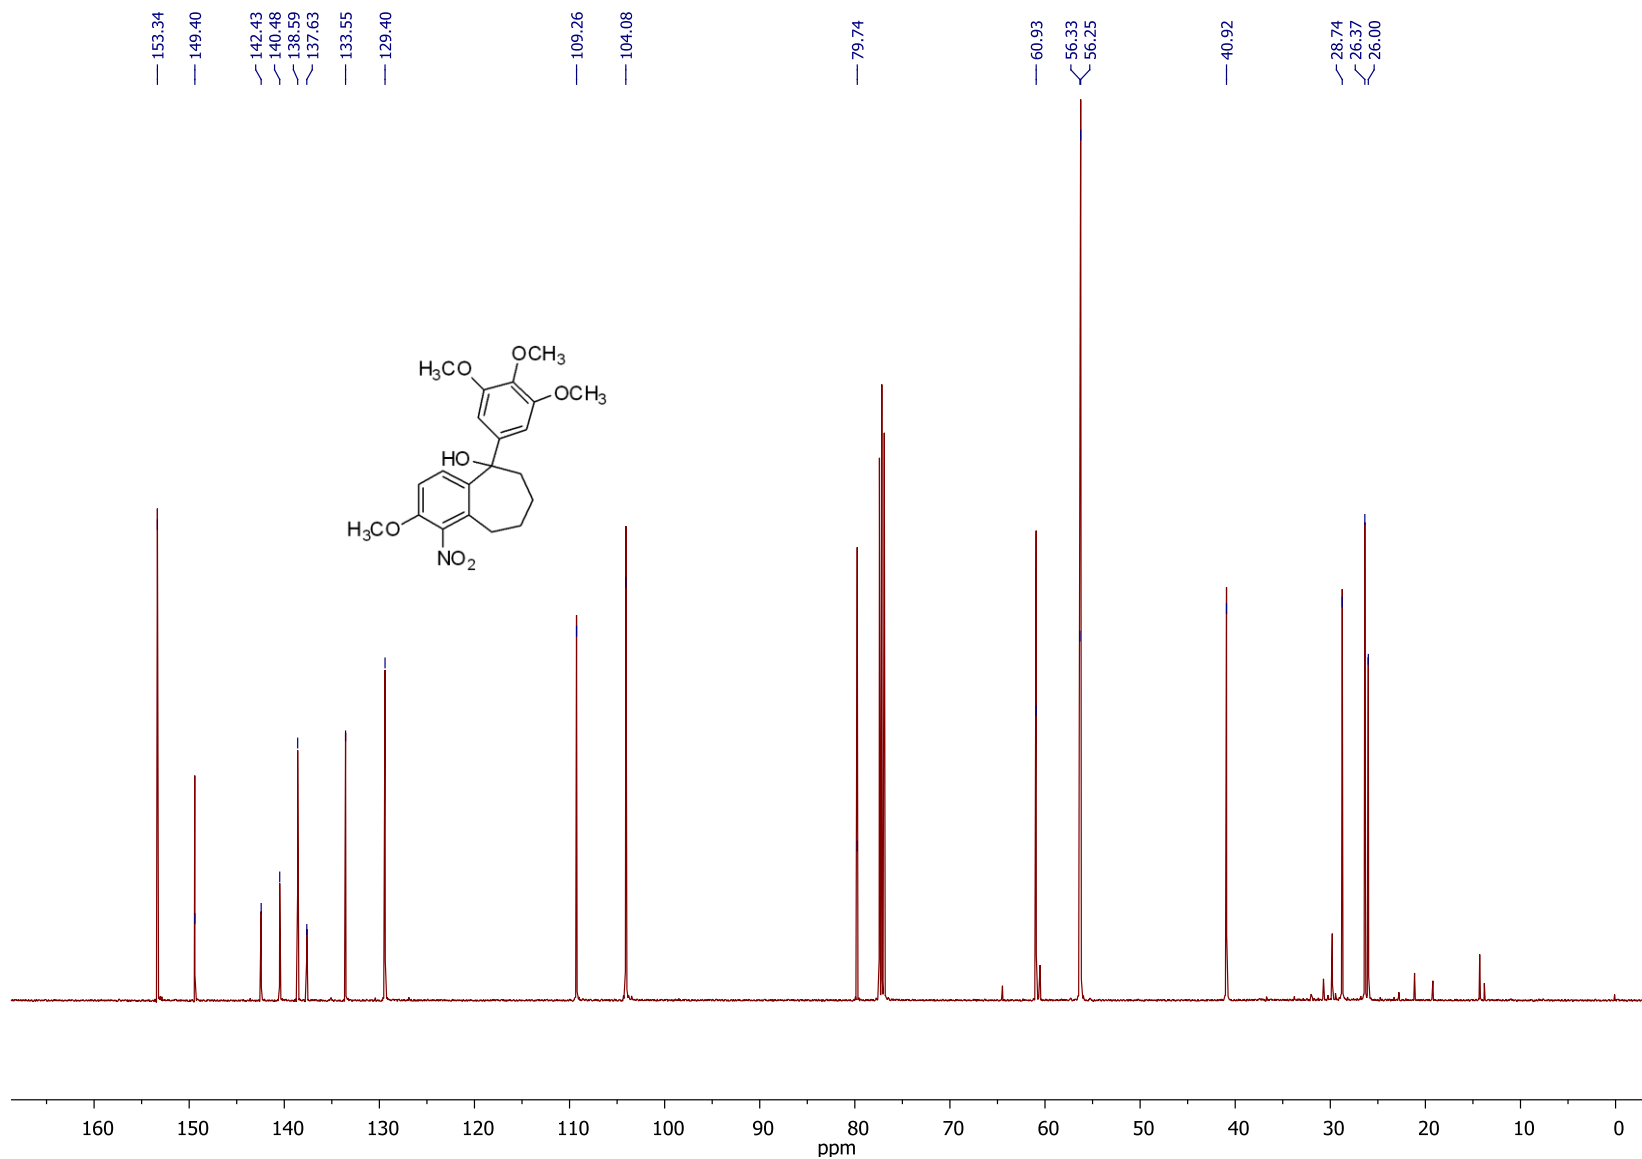

<sup>1</sup>H NMR (CDCl<sub>3</sub>, 500 MHz) Compound 32

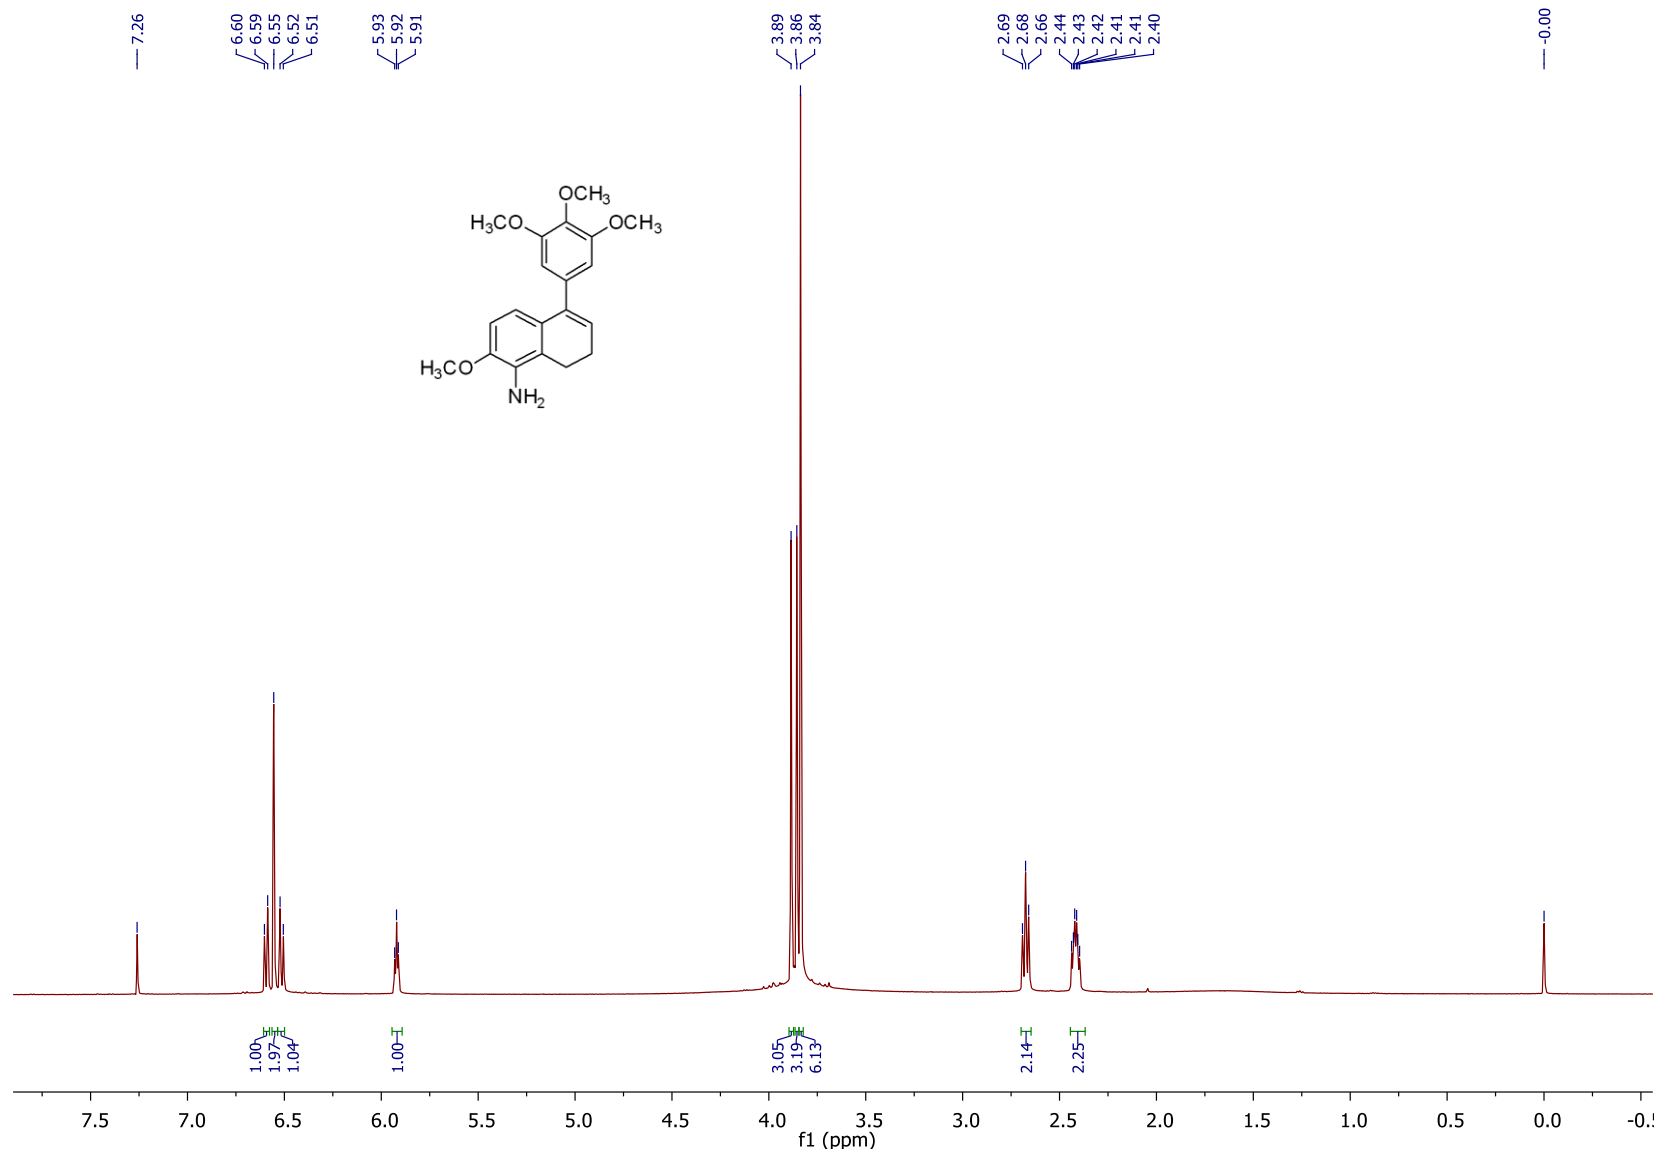

S146

$^{13}\text{C}$  NMR (DMSO-d<sub>6</sub>, 125 MHz) Compound **32**

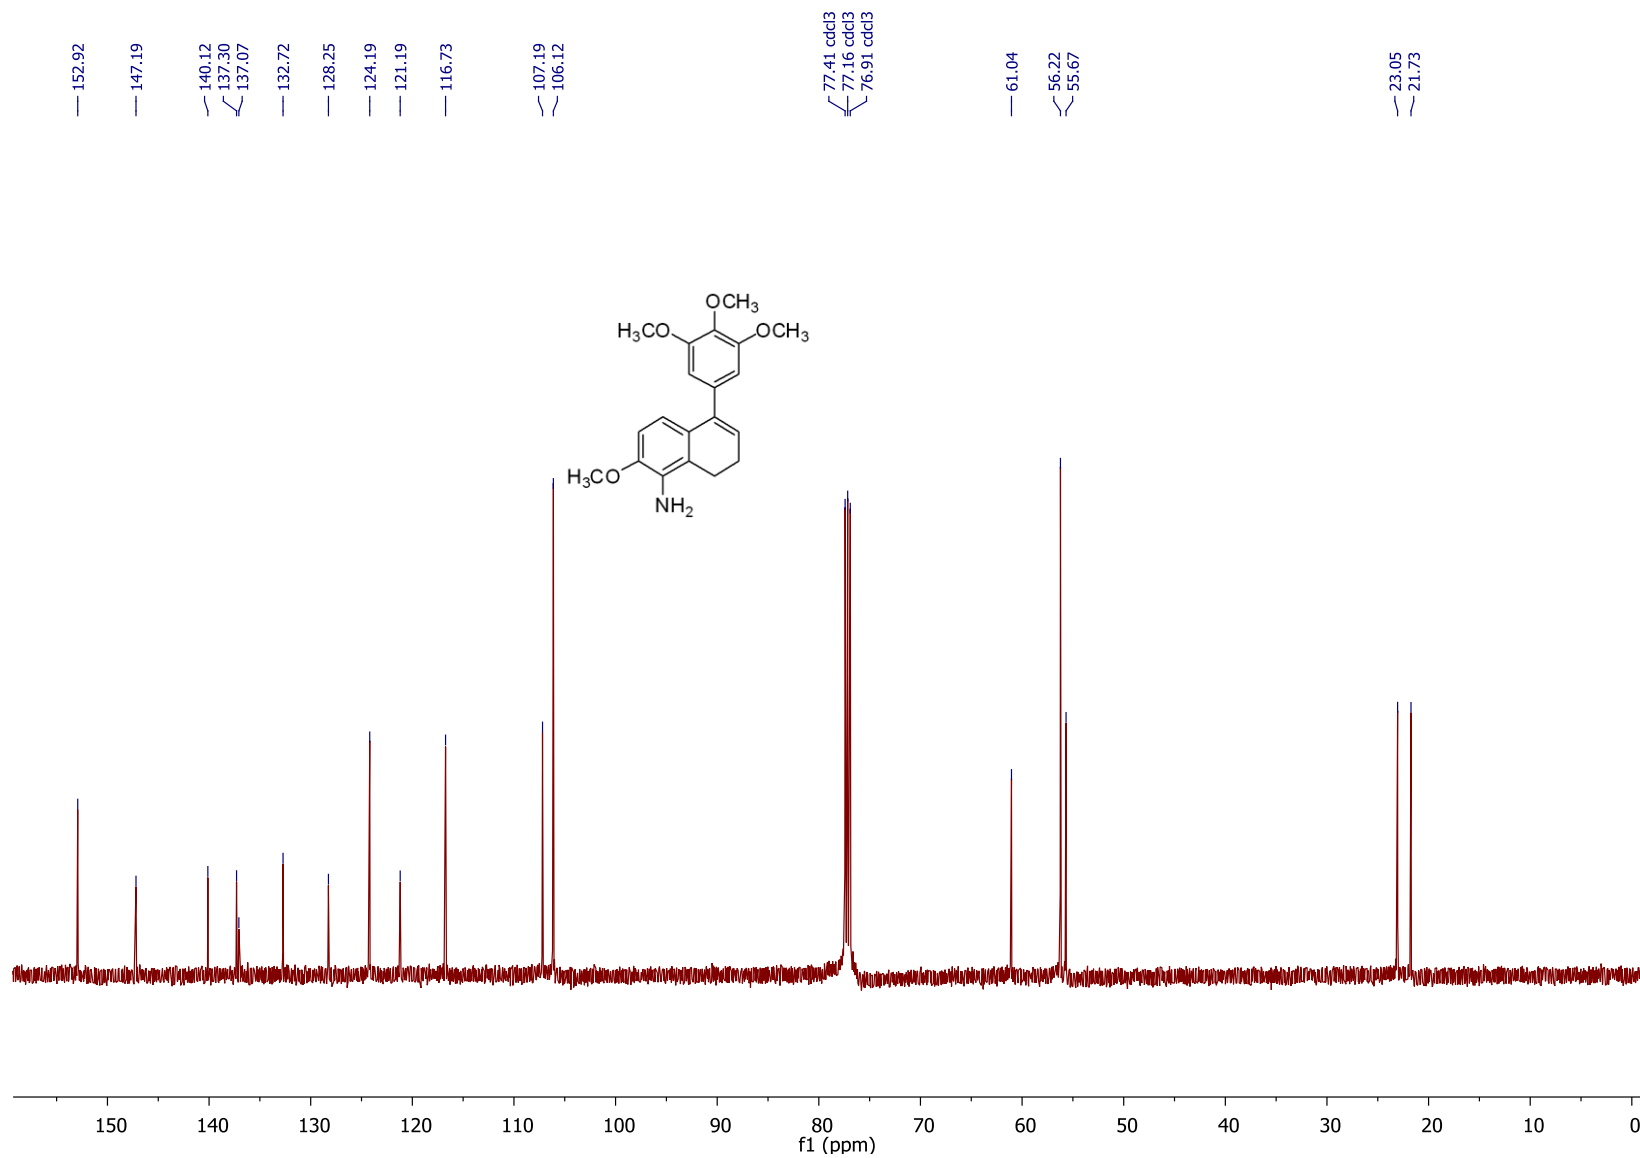

S147

# HRMS Compound 32

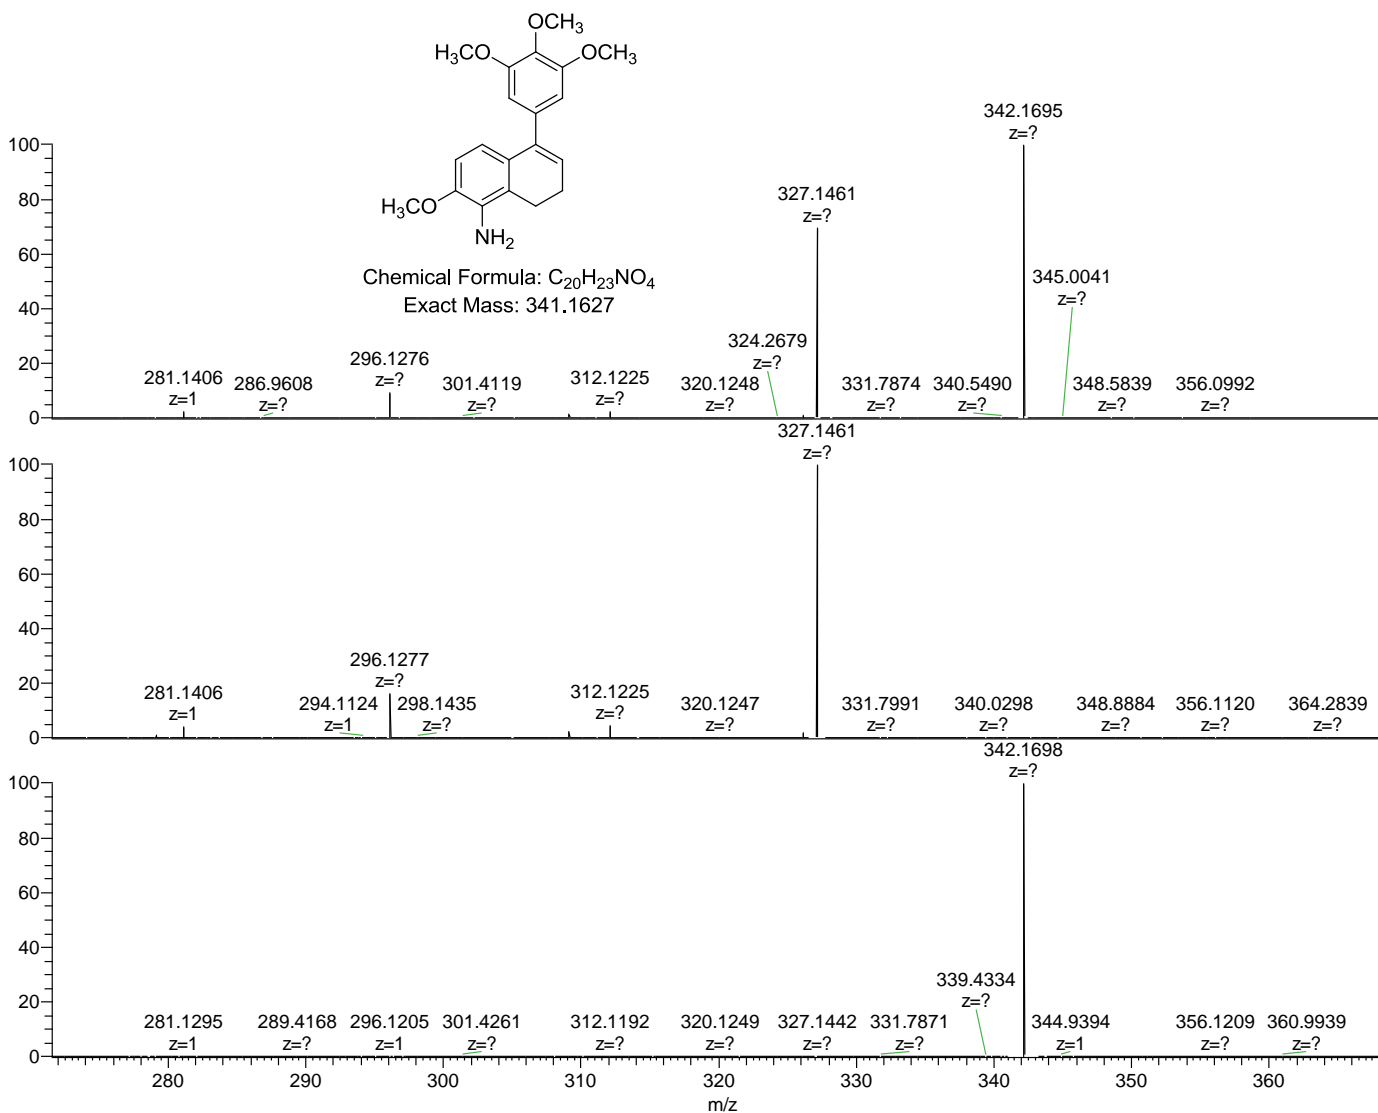

# HPLC for Compound 32

Data File C:\CHEM32\1\DATA\ERIC LIN\CML\_1\_115000015.D  
Sample Name: CML\_1\_115\_run1

=====  
Acq. Operator : ERIC LIN  
Acq. Instrument : Instrument 1 Location : -  
Injection Date : 7/24/2012 12:57:54 PM  
Acq. Method : C:\CHEM32\1\METHODS\MASTERMETHOD.M  
Last changed : 7/24/2012 12:53:18 PM by ERIC LIN  
Analysis Method : C:\CHEM32\1\METHODS\MASTERMETHOD.M  
Last changed : 8/7/2012 10:31:04 PM by ERIC LIN  
(modified after loading)

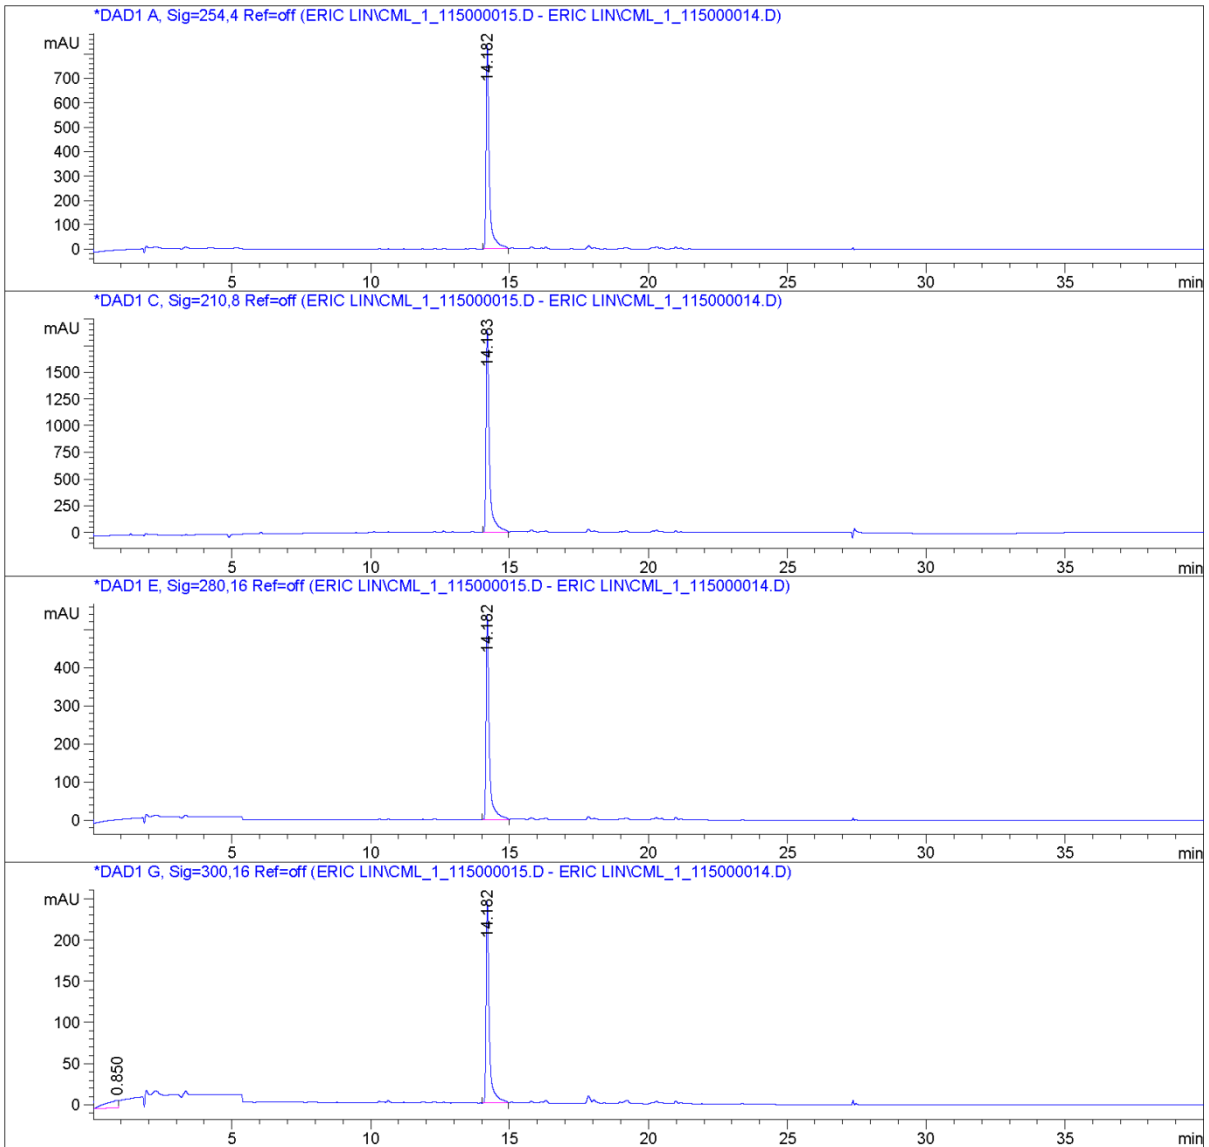

Data File C:\CHEM32\1\DATA\ERIC LIN\CML\_1\_115000015.D  
Sample Name: CML\_1\_115\_run1

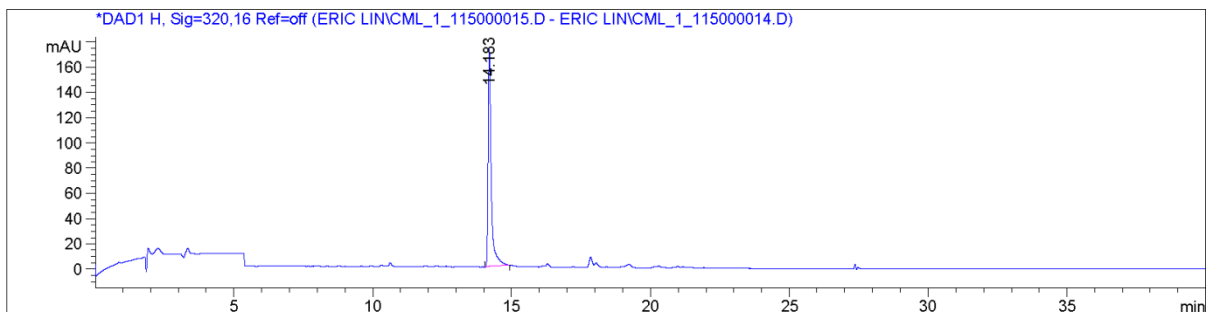

=====  
Area Percent Report  
=====

Sorted By : Signal  
Multiplier : 1.0000  
Dilution : 1.0000  
Use Multiplier & Dilution Factor with ISTDs

Signal 1: DAD1 A, Sig=254,4 Ref=off  
Signal has been modified after loading from rawdata file!

| Peak # | RetTime [min] | Type | Width [min] | Area [mAU*s] | Height [mAU] | Area %   |
|--------|---------------|------|-------------|--------------|--------------|----------|
| 1      | 14.182        | BB   | 0.1152      | 6719.51270   | 841.00653    | 100.0000 |

Totals : 6719.51270 841.00653

Signal 2: DAD1 C, Sig=210,8 Ref=off  
Signal has been modified after loading from rawdata file!

| Peak # | RetTime [min] | Type | Width [min] | Area [mAU*s] | Height [mAU] | Area %   |
|--------|---------------|------|-------------|--------------|--------------|----------|
| 1      | 14.183        | VB   | 0.1246      | 1.60874e4    | 1902.56287   | 100.0000 |

Totals : 1.60874e4 1902.56287

Signal 3: DAD1 E, Sig=280,16 Ref=off  
Signal has been modified after loading from rawdata file!

Data File C:\CHEM32\1\DATA\ERIC LIN\CML\_1\_115000015.D  
Sample Name: CML\_1\_115\_run1

| Peak # | RetTime [min] | Type | Width [min] | Area [mAU*s] | Height [mAU] | Area %   |
|--------|---------------|------|-------------|--------------|--------------|----------|
| 1      | 14.182        | BB   | 0.1150      | 4291.95557   | 538.29181    | 100.0000 |

Totals :                                   4291.95557  538.29181

Signal 4: DAD1 G, Sig=300,16 Ref=off  
Signal has been modified after loading from rawdata file!

| Peak # | RetTime [min] | Type | Width [min] | Area [mAU*s] | Height [mAU] | Area %  |
|--------|---------------|------|-------------|--------------|--------------|---------|
| 1      | 0.850         | BV   | 0.4104      | 317.42105    | 9.63334      | 13.9350 |
| 2      | 14.182        | BB   | 0.1150      | 1960.44995   | 245.89526    | 86.0650 |

Totals :                                   2277.87100  255.52861

Signal 5: DAD1 H, Sig=320,16 Ref=off  
Signal has been modified after loading from rawdata file!

| Peak # | RetTime [min] | Type | Width [min] | Area [mAU*s] | Height [mAU] | Area %   |
|--------|---------------|------|-------------|--------------|--------------|----------|
| 1      | 14.183        | BB   | 0.1132      | 1353.12427   | 173.10461    | 100.0000 |

Totals :                                   1353.12427  173.10461

=====  
\*\*\* End of Report \*\*\*

<sup>1</sup>H NMR (CDCl<sub>3</sub>, 500 MHz) Compound 33

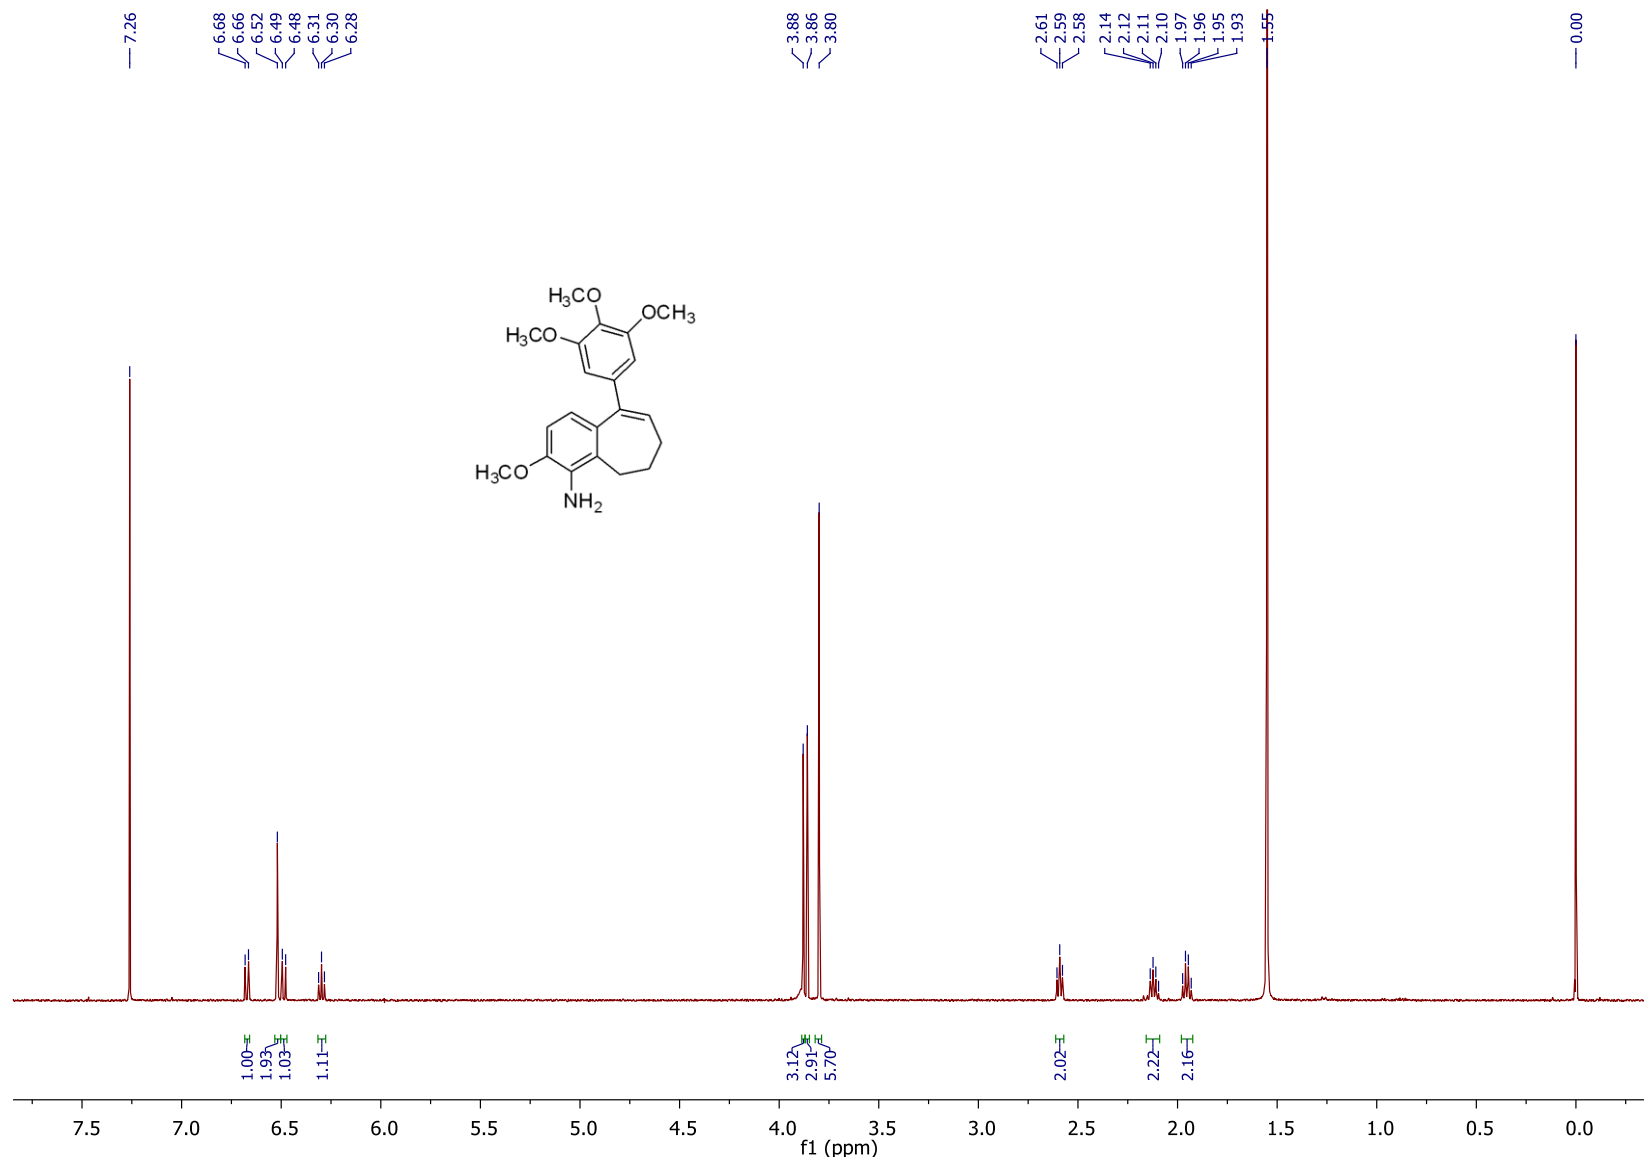



$^{13}\text{C}$  NMR ( $\text{CDCl}_3$ , 125 MHz) Compound **33**

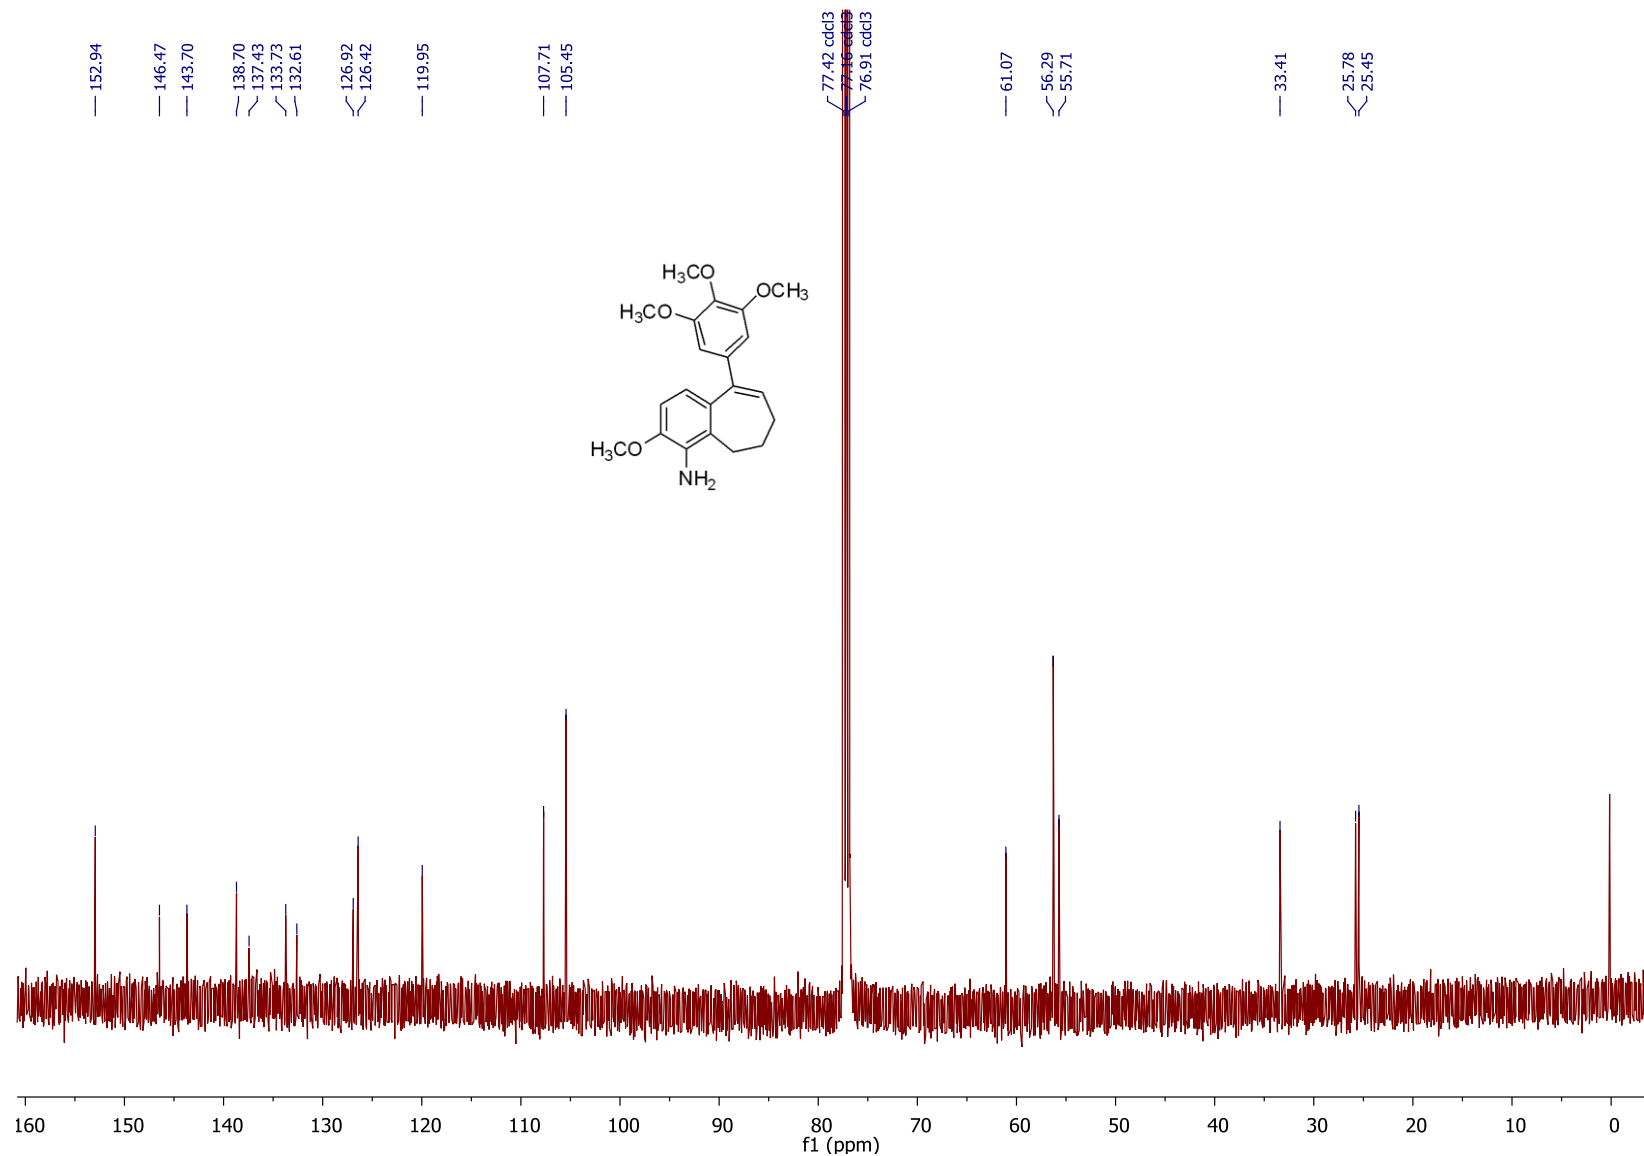

S153

# HRMS Compound 33

C:\Xcalibur...\CML\_IL\_041\_Orbi\_+ESI

8/21/2013 4:30:17 PM

CML\_IL\_041

CML\_IL\_041\_Orbi\_+ESI #50 RT: 0.47 AV: 1 NL:  
T: FTMS + p ESI Full ms [150.00-1000.00]

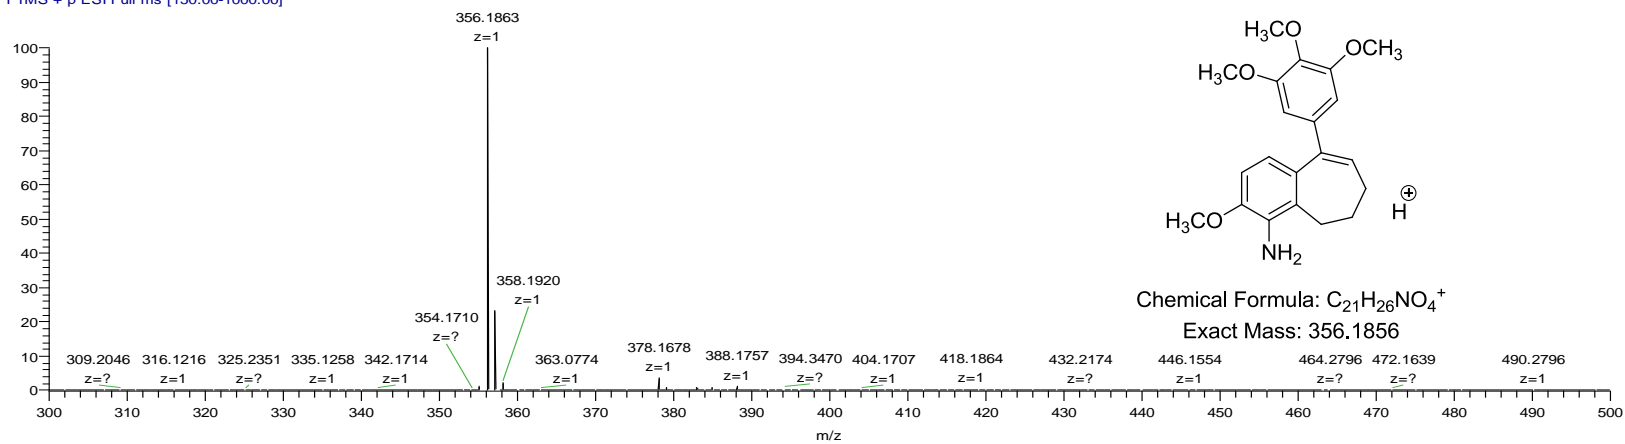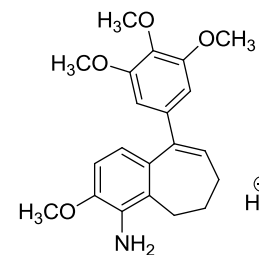

Chemical Formula:  $C_{21}H_{26}NO_4^+$   
Exact Mass: 356.1856

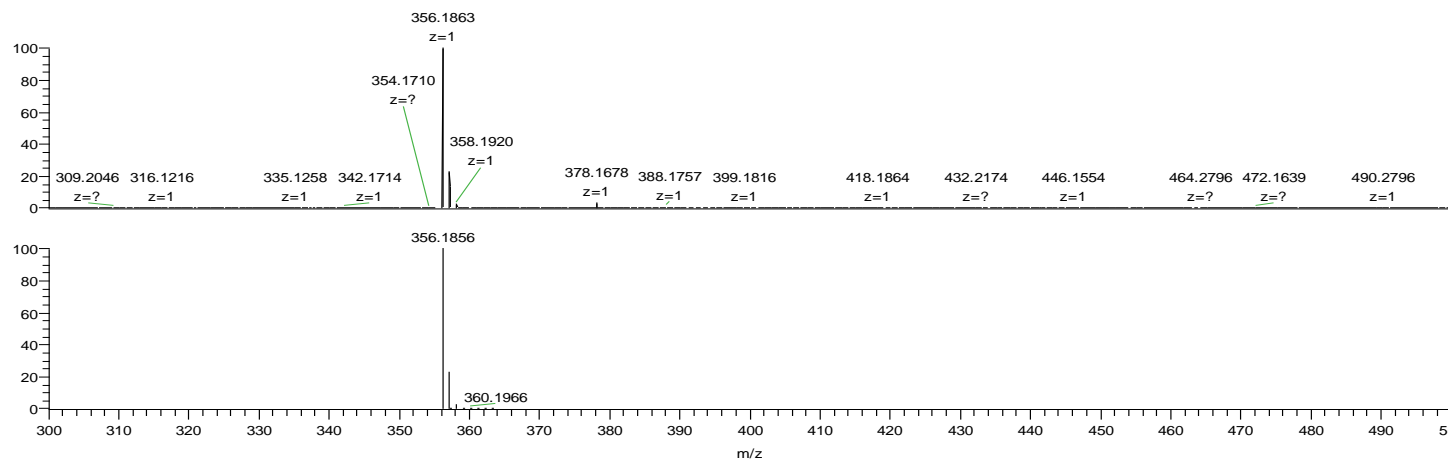

NL:  
9.06E8  
CML\_IL\_041\_Orbi\_+  
ESI#50 RT: 0.47  
AV: 1 T: FTMS + p  
ESI Full ms  
[150.00-1000.00]

NL:  
7.85E5  
 $C_{21}H_{26}NO_4$   
 $C_{21}H_{26}N_1O_4$   
pa Chrg 1

# HPLC for Compound 33

Data File C:\CHEM32\1\DATA\ERIC LIN\II\_041\_RUN10034.D

Sample Name: CML\_II\_041\_run1

```
=====
Acq. Operator   : ERIC LIN
Acq. Instrument : Instrument 1                Location : -
Injection Date  : 10/3/2012 10:17:19 PM
Acq. Method     : C:\CHEM32\1\METHODS\MASTERMETHOD.M
Last changed    : 10/3/2012 10:08:22 PM by ERIC LIN
                  (modified after loading)
Analysis Method : C:\CHEM32\1\DATA\ERIC LIN\II_041_RUN10034.D\DA.M (MASTERMETHOD.M)
Last changed    : 10/3/2012 11:09:57 PM by Matt Mac
Sample Info     :
```

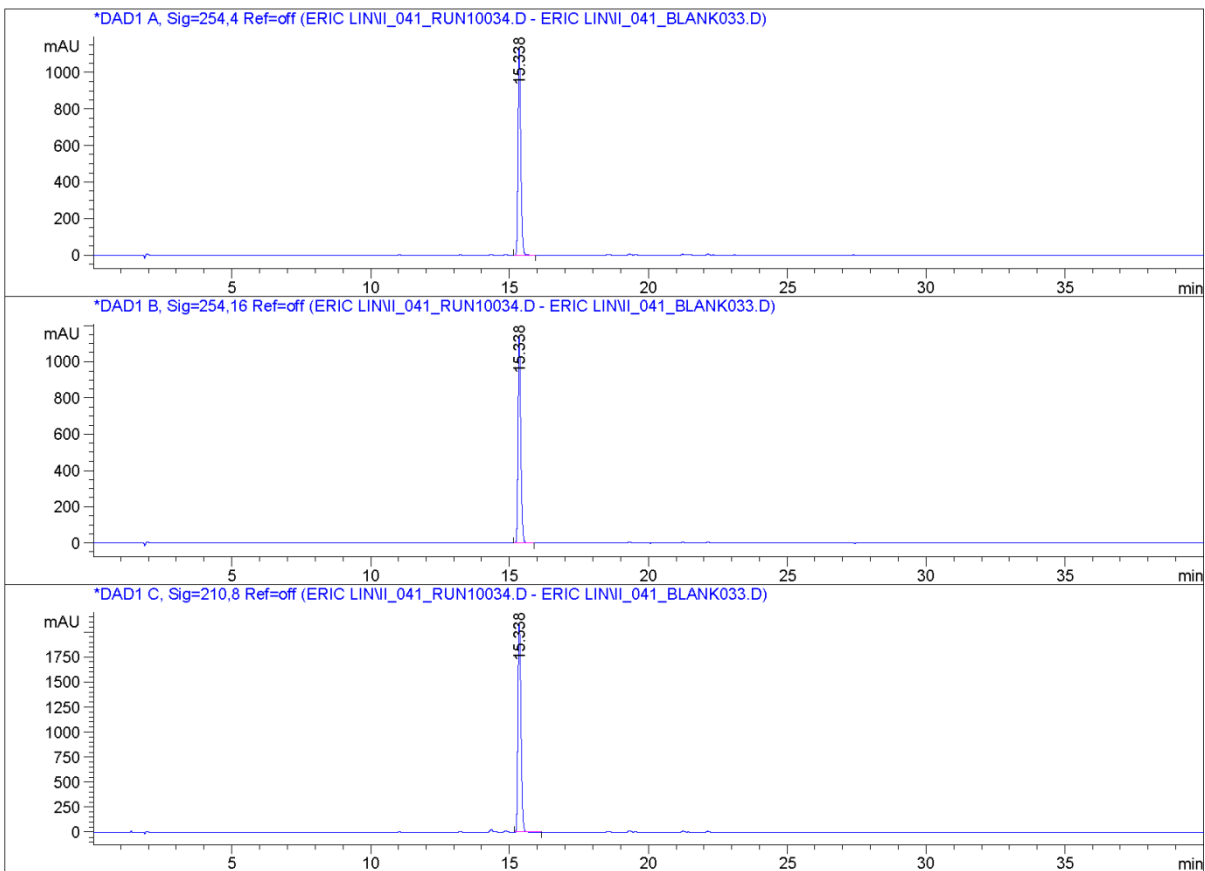

Data File C:\CHEM32\1\DATA\ERIC LIN\II\_041\_RUN10034.D  
Sample Name: CML\_II\_041\_run1

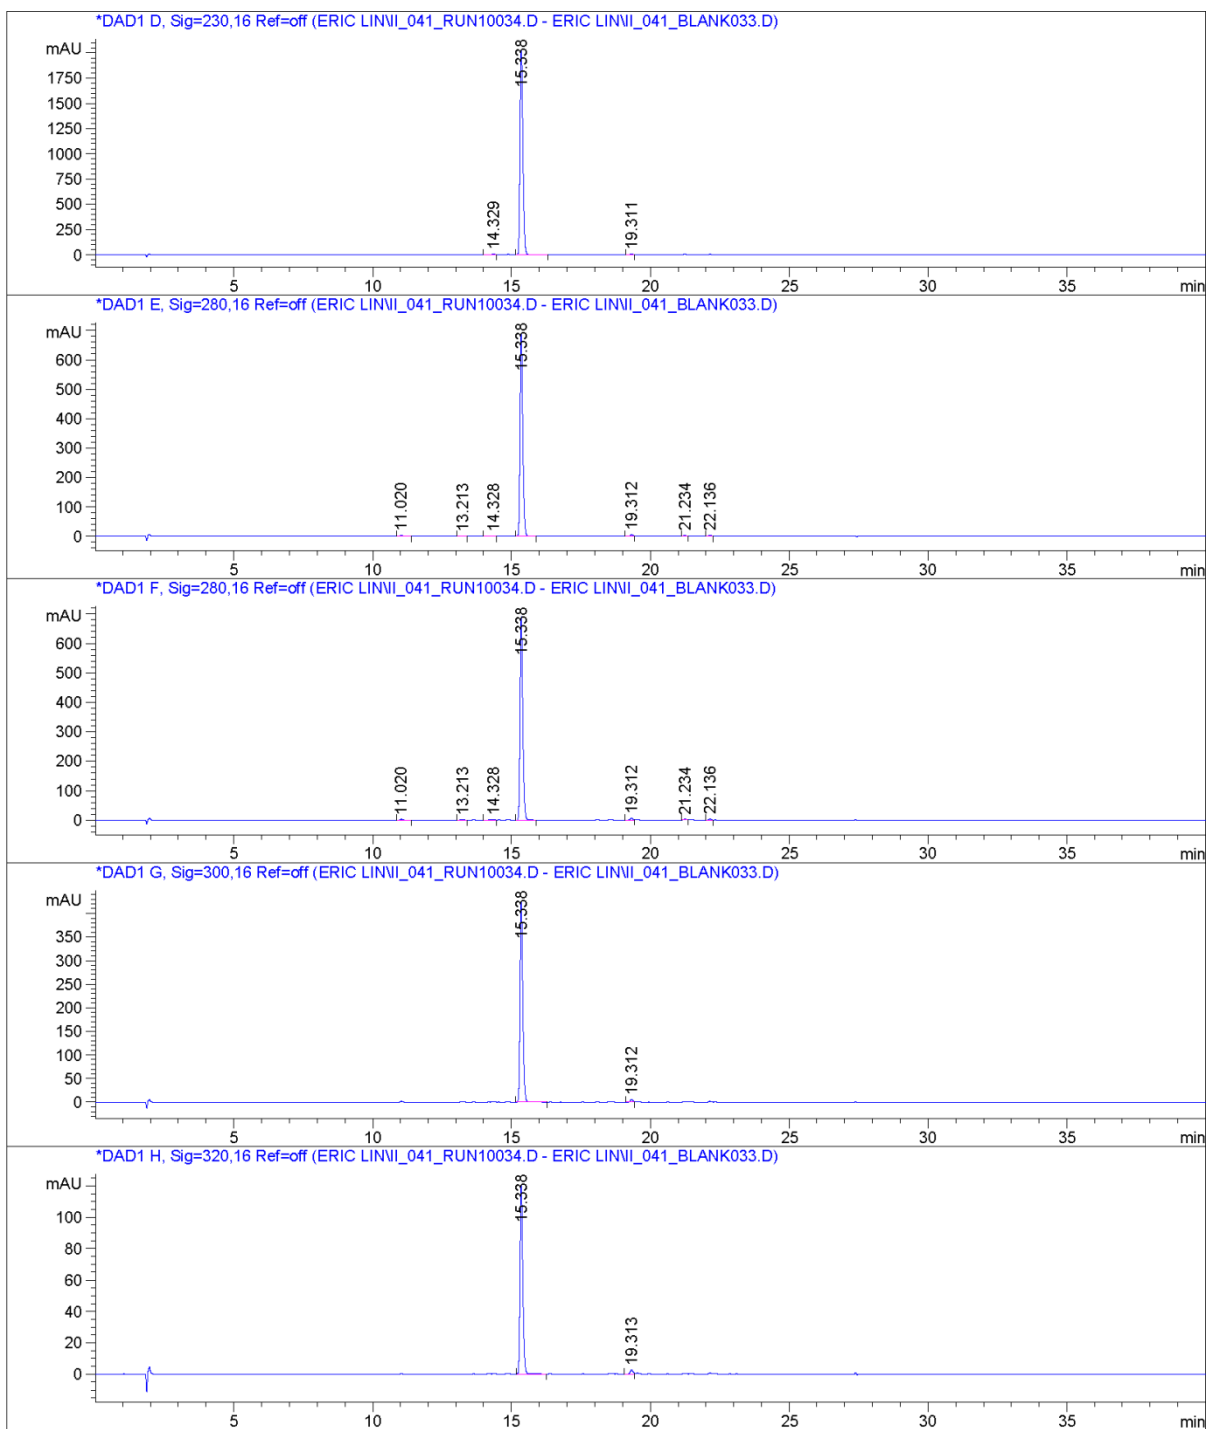

Data File C:\CHEM32\1\DATA\ERIC LIN\II\_041\_RUN10034.D  
Sample Name: CML\_II\_041\_run1

=====  
Area Percent Report  
=====

Sorted By : Signal  
Multiplier : 1.0000  
Dilution : 1.0000  
Use Multiplier & Dilution Factor with ISTDs

Signal 1: DAD1 A, Sig=254,4 Ref=off  
Signal has been modified after loading from rawdata file!

| Peak # | RetTime [min] | Type | Width [min] | Area [mAU*s] | Height [mAU] | Area %   |
|--------|---------------|------|-------------|--------------|--------------|----------|
| 1      | 15.338        | BB   | 0.1028      | 7705.96338   | 1140.77222   | 100.0000 |

Totals : 7705.96338 1140.77222

Signal 2: DAD1 B, Sig=254,16 Ref=off  
Signal has been modified after loading from rawdata file!

| Peak # | RetTime [min] | Type | Width [min] | Area [mAU*s] | Height [mAU] | Area %   |
|--------|---------------|------|-------------|--------------|--------------|----------|
| 1      | 15.338        | BB   | 0.1028      | 7757.90479   | 1148.84033   | 100.0000 |

Totals : 7757.90479 1148.84033

Signal 3: DAD1 C, Sig=210,8 Ref=off  
Signal has been modified after loading from rawdata file!

| Peak # | RetTime [min] | Type | Width [min] | Area [mAU*s] | Height [mAU] | Area %   |
|--------|---------------|------|-------------|--------------|--------------|----------|
| 1      | 15.338        | BB   | 0.1211      | 1.59885e4    | 2092.96558   | 100.0000 |

Totals : 1.59885e4 2092.96558

Signal 4: DAD1 D, Sig=230,16 Ref=off  
Signal has been modified after loading from rawdata file!

Data File C:\CHEM32\1\DATA\ERIC LIN\II\_041\_RUN10034.D  
Sample Name: CML\_II\_041\_run1

| Peak # | RetTime [min] | Type | Width [min] | Area [mAU*s] | Height [mAU] | Area %  |
|--------|---------------|------|-------------|--------------|--------------|---------|
| 1      | 14.329        | BV   | 0.1151      | 81.64388     | 10.45497     | 0.5524  |
| 2      | 15.338        | BB   | 0.1118      | 1.46307e4    | 2036.75854   | 98.9872 |
| 3      | 19.311        | BV   | 0.1073      | 68.05374     | 9.76025      | 0.4604  |

Totals :                    1.47804e4  2056.97377

Signal 5: DAD1 E, Sig=280,16 Ref=off  
Signal has been modified after loading from rawdata file!

| Peak # | RetTime [min] | Type | Width [min] | Area [mAU*s] | Height [mAU] | Area %  |
|--------|---------------|------|-------------|--------------|--------------|---------|
| 1      | 11.020        | BB   | 0.0916      | 21.07620     | 3.53085      | 0.4414  |
| 2      | 13.213        | BB   | 0.1162      | 14.41269     | 1.78559      | 0.3019  |
| 3      | 14.328        | BB   | 0.1234      | 15.15916     | 1.77981      | 0.3175  |
| 4      | 15.338        | BB   | 0.1024      | 4643.60498   | 691.30487    | 97.2565 |
| 5      | 19.312        | BV   | 0.1072      | 40.08195     | 5.75978      | 0.8395  |
| 6      | 21.234        | BB   | 0.0913      | 17.97745     | 3.02522      | 0.3765  |
| 7      | 22.136        | BV   | 0.0880      | 22.28565     | 3.93942      | 0.4668  |

Totals :                    4774.59807  711.12554

Signal 6: DAD1 F, Sig=280,16 Ref=off  
Signal has been modified after loading from rawdata file!

| Peak # | RetTime [min] | Type | Width [min] | Area [mAU*s] | Height [mAU] | Area %  |
|--------|---------------|------|-------------|--------------|--------------|---------|
| 1      | 11.020        | BB   | 0.0916      | 21.07620     | 3.53085      | 0.4414  |
| 2      | 13.213        | BB   | 0.1162      | 14.41269     | 1.78559      | 0.3019  |
| 3      | 14.328        | BB   | 0.1234      | 15.15916     | 1.77981      | 0.3175  |
| 4      | 15.338        | BB   | 0.1024      | 4643.60498   | 691.30487    | 97.2565 |
| 5      | 19.312        | BV   | 0.1072      | 40.08195     | 5.75978      | 0.8395  |
| 6      | 21.234        | BB   | 0.0913      | 17.97745     | 3.02522      | 0.3765  |
| 7      | 22.136        | BV   | 0.0880      | 22.28565     | 3.93942      | 0.4668  |

Totals :                    4774.59807  711.12554

Signal 7: DAD1 G, Sig=300,16 Ref=off  
Signal has been modified after loading from rawdata file!

Data File C:\CHEM32\1\DATA\ERIC LIN\II\_041\_RUN10034.D  
Sample Name: CML\_II\_041\_run1

| Peak #   | RetTime [min] | Type | Width [min] | Area [mAU*s] | Height [mAU] | Area %  |
|----------|---------------|------|-------------|--------------|--------------|---------|
| 1        | 15.338        | BB   | 0.1025      | 2873.33496   | 427.19150    | 98.6222 |
| 2        | 19.312        | BV   | 0.1067      | 40.14083     | 5.80112      | 1.3778  |
| Totals : |               |      |             | 2913.47579   | 432.99261    |         |

Signal 8: DAD1 H, Sig=320,16 Ref=off  
Signal has been modified after loading from rawdata file!

| Peak #   | RetTime [min] | Type | Width [min] | Area [mAU*s] | Height [mAU] | Area %  |
|----------|---------------|------|-------------|--------------|--------------|---------|
| 1        | 15.338        | BB   | 0.1027      | 814.71570    | 120.79123    | 97.7850 |
| 2        | 19.313        | BV   | 0.1074      | 18.45501     | 2.64384      | 2.2150  |
| Totals : |               |      |             | 833.17071    | 123.43507    |         |

=====  
\*\*\* End of Report \*\*\*

<sup>1</sup>H NMR (CDCl<sub>3</sub>, 500 MHz) Compound 34

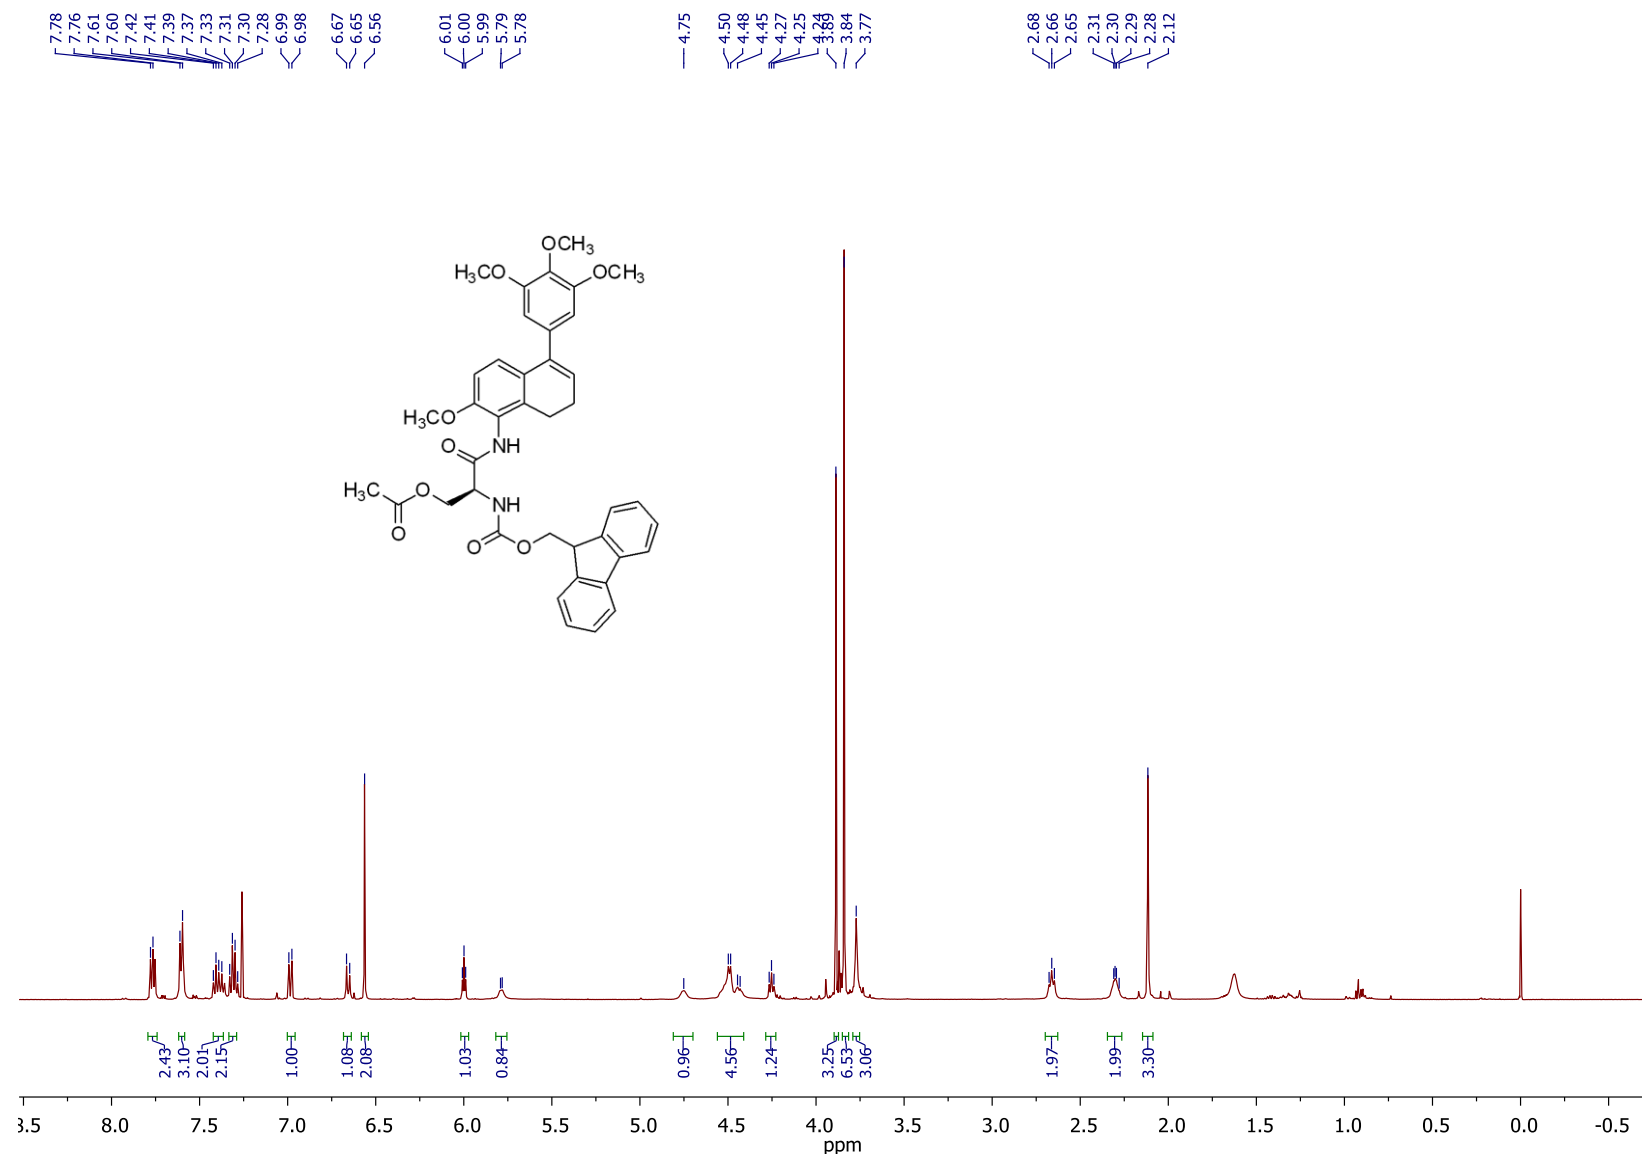



<sup>13</sup>C NMR (CDCl<sub>3</sub>, 125 MHz) Compound **34**

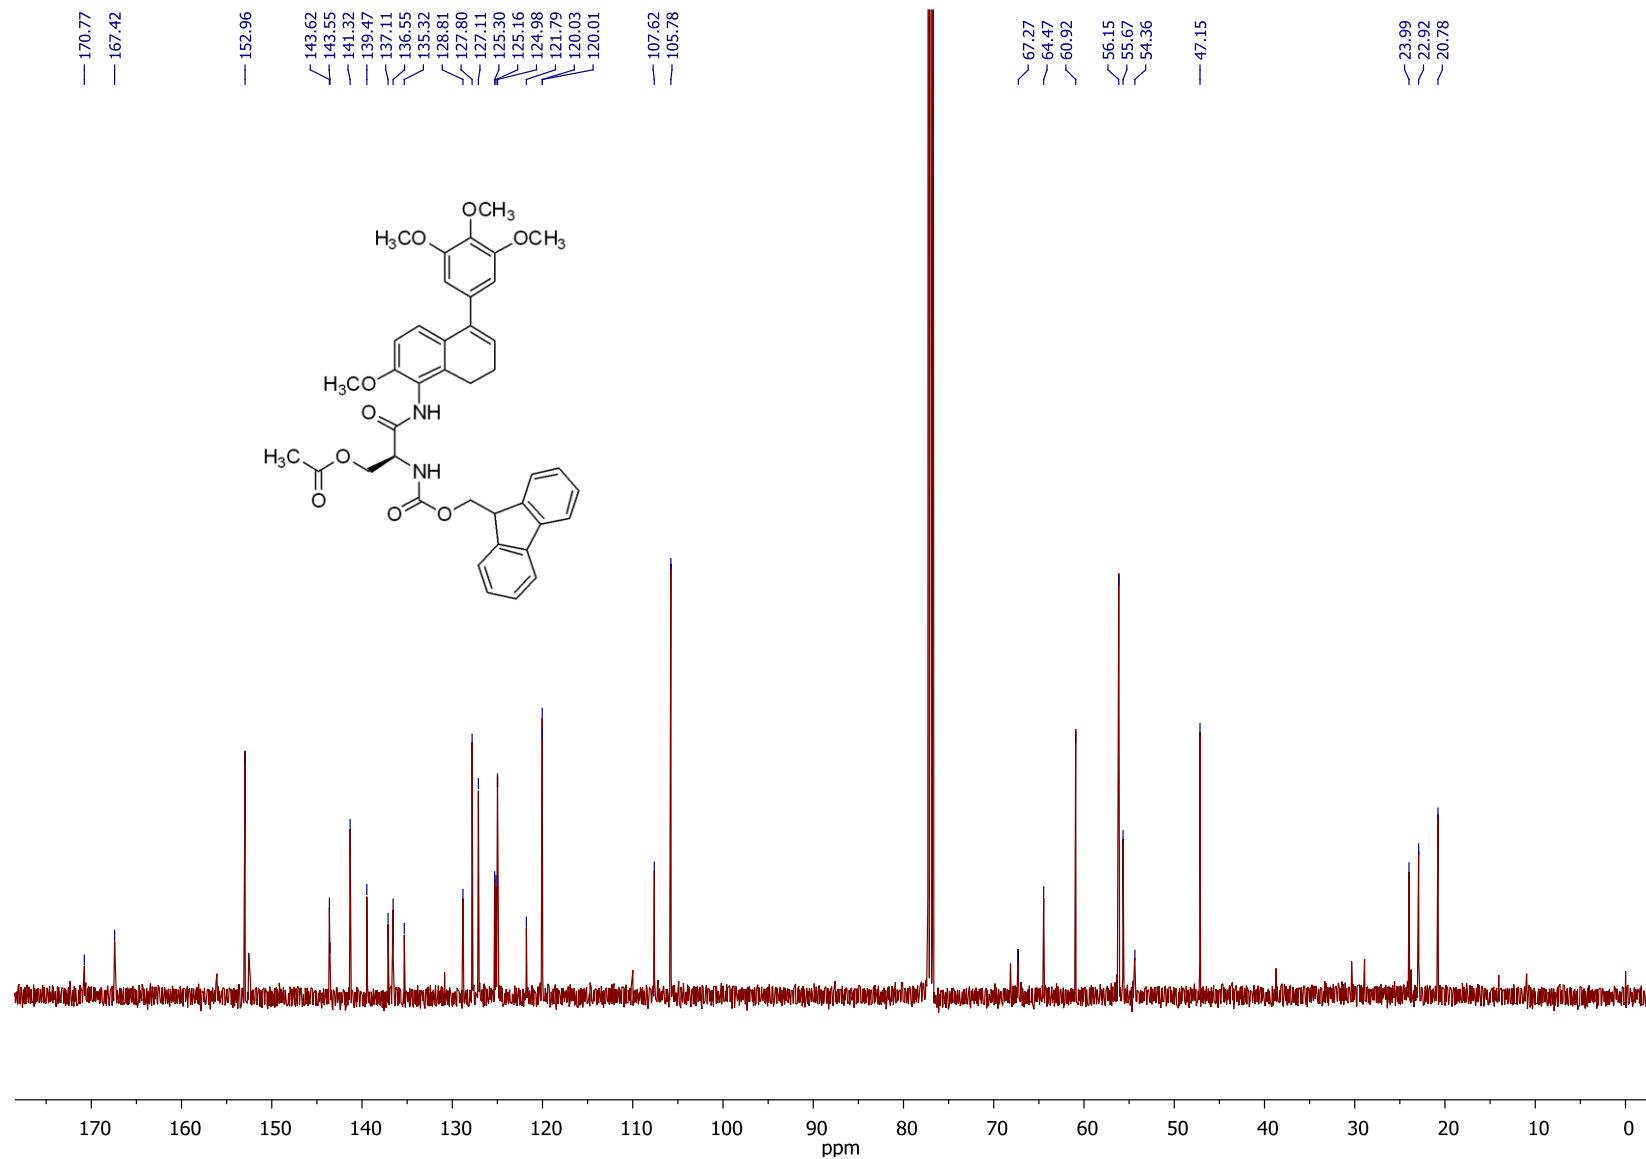

<sup>1</sup>H NMR (CDCl<sub>3</sub>, 500 MHz) Compound 35

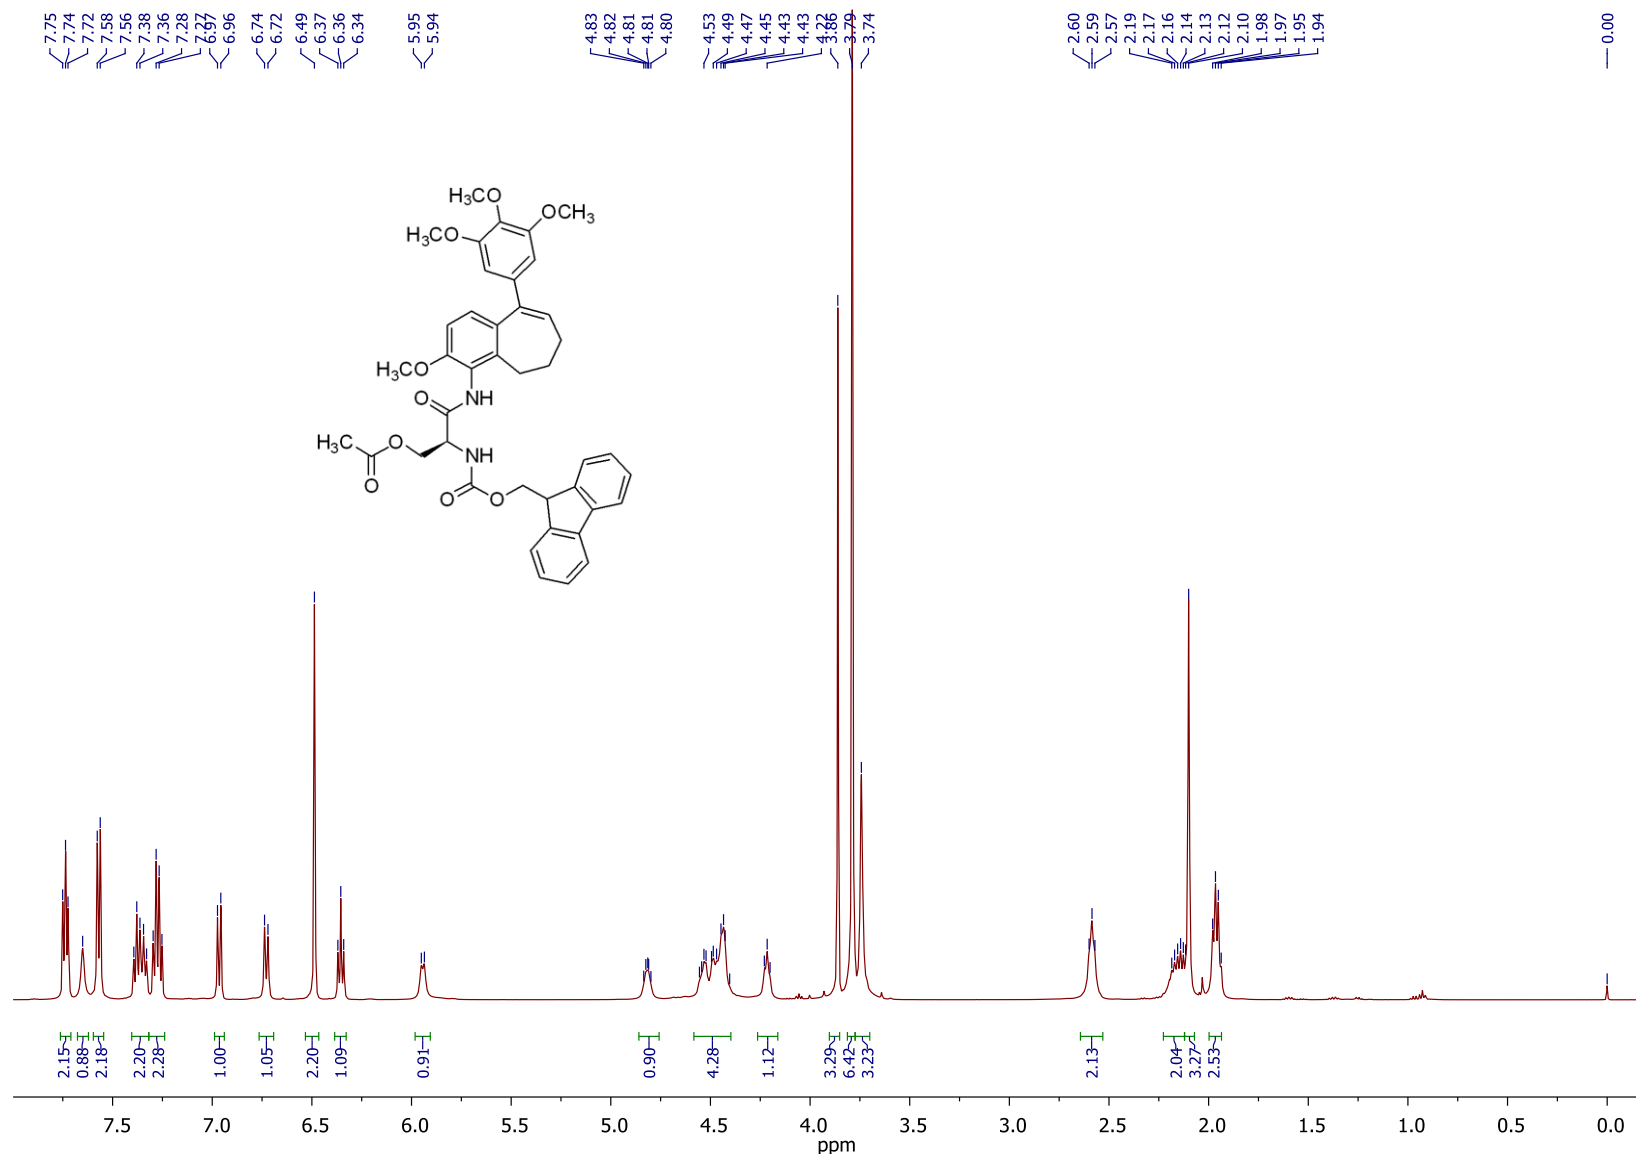

S162

$^{13}\text{C}$  NMR ( $\text{CDCl}_3$ , 125 MHz) Compound **35**

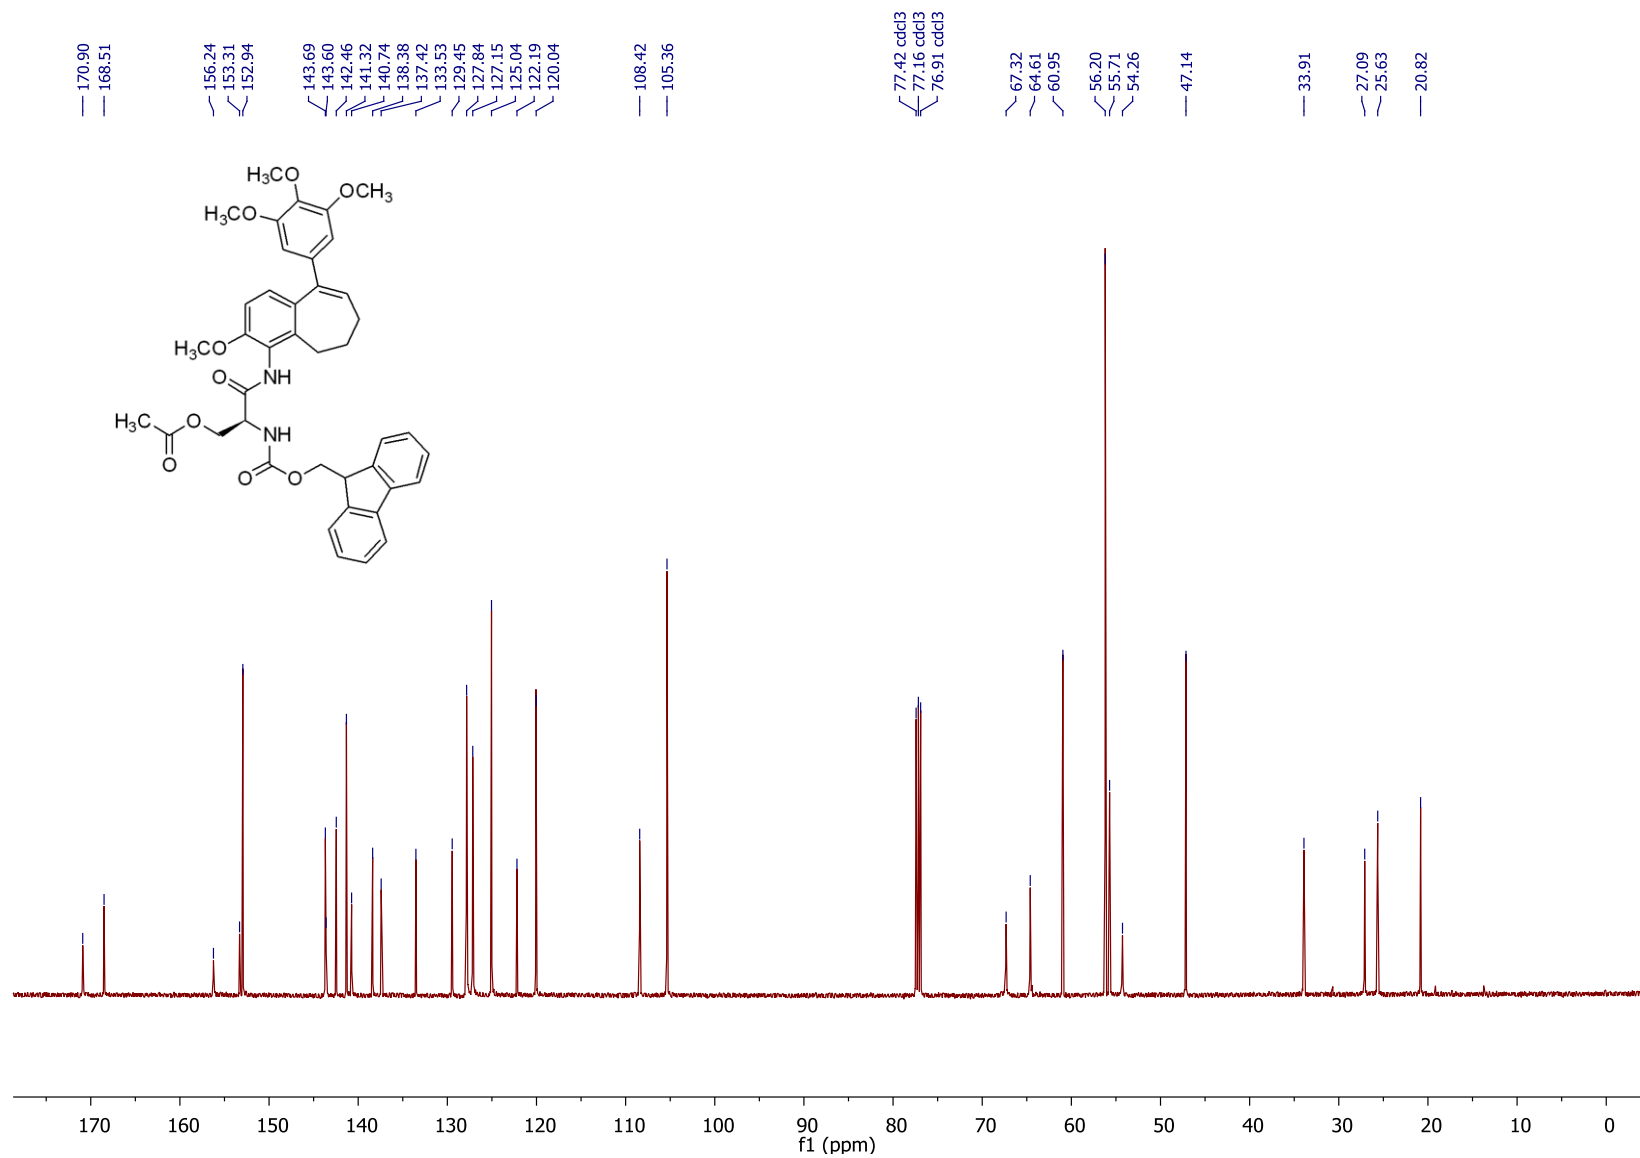

**S163**

<sup>1</sup>H NMR (CDCl<sub>3</sub>, 500 MHz) Compound 36

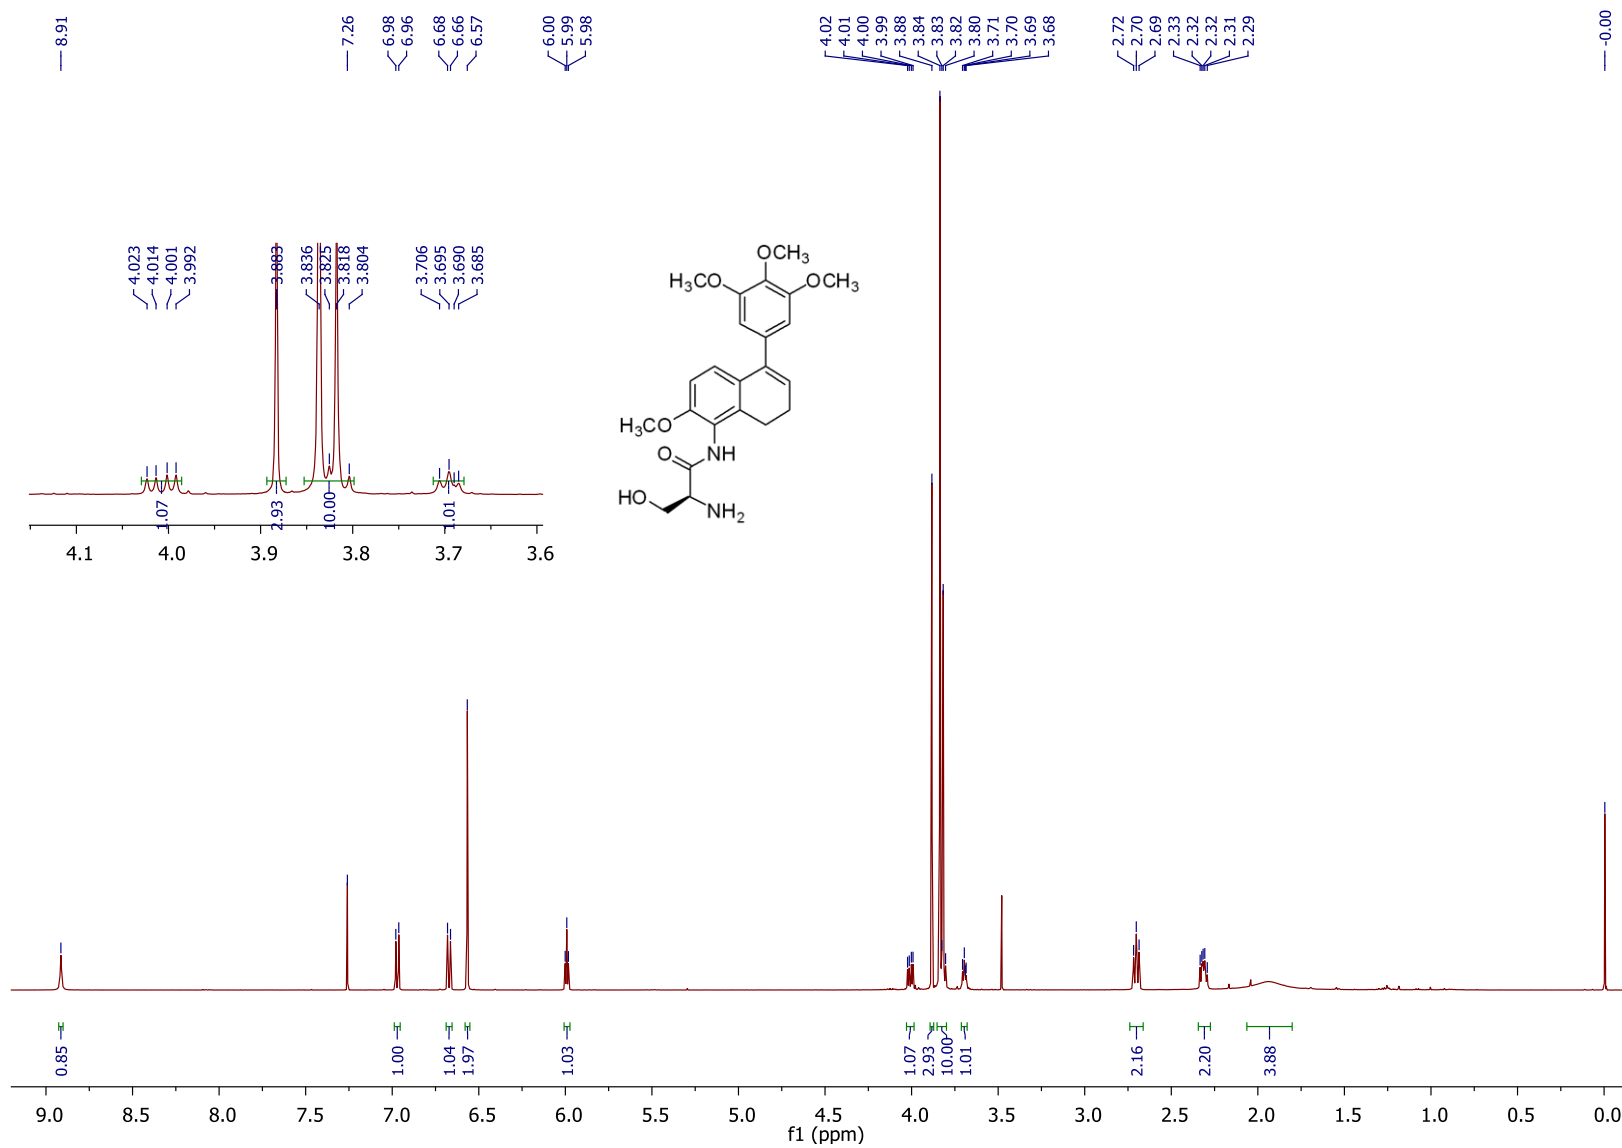

<sup>13</sup>C NMR (CDCl<sub>3</sub>, 125 MHz) Compound **36**

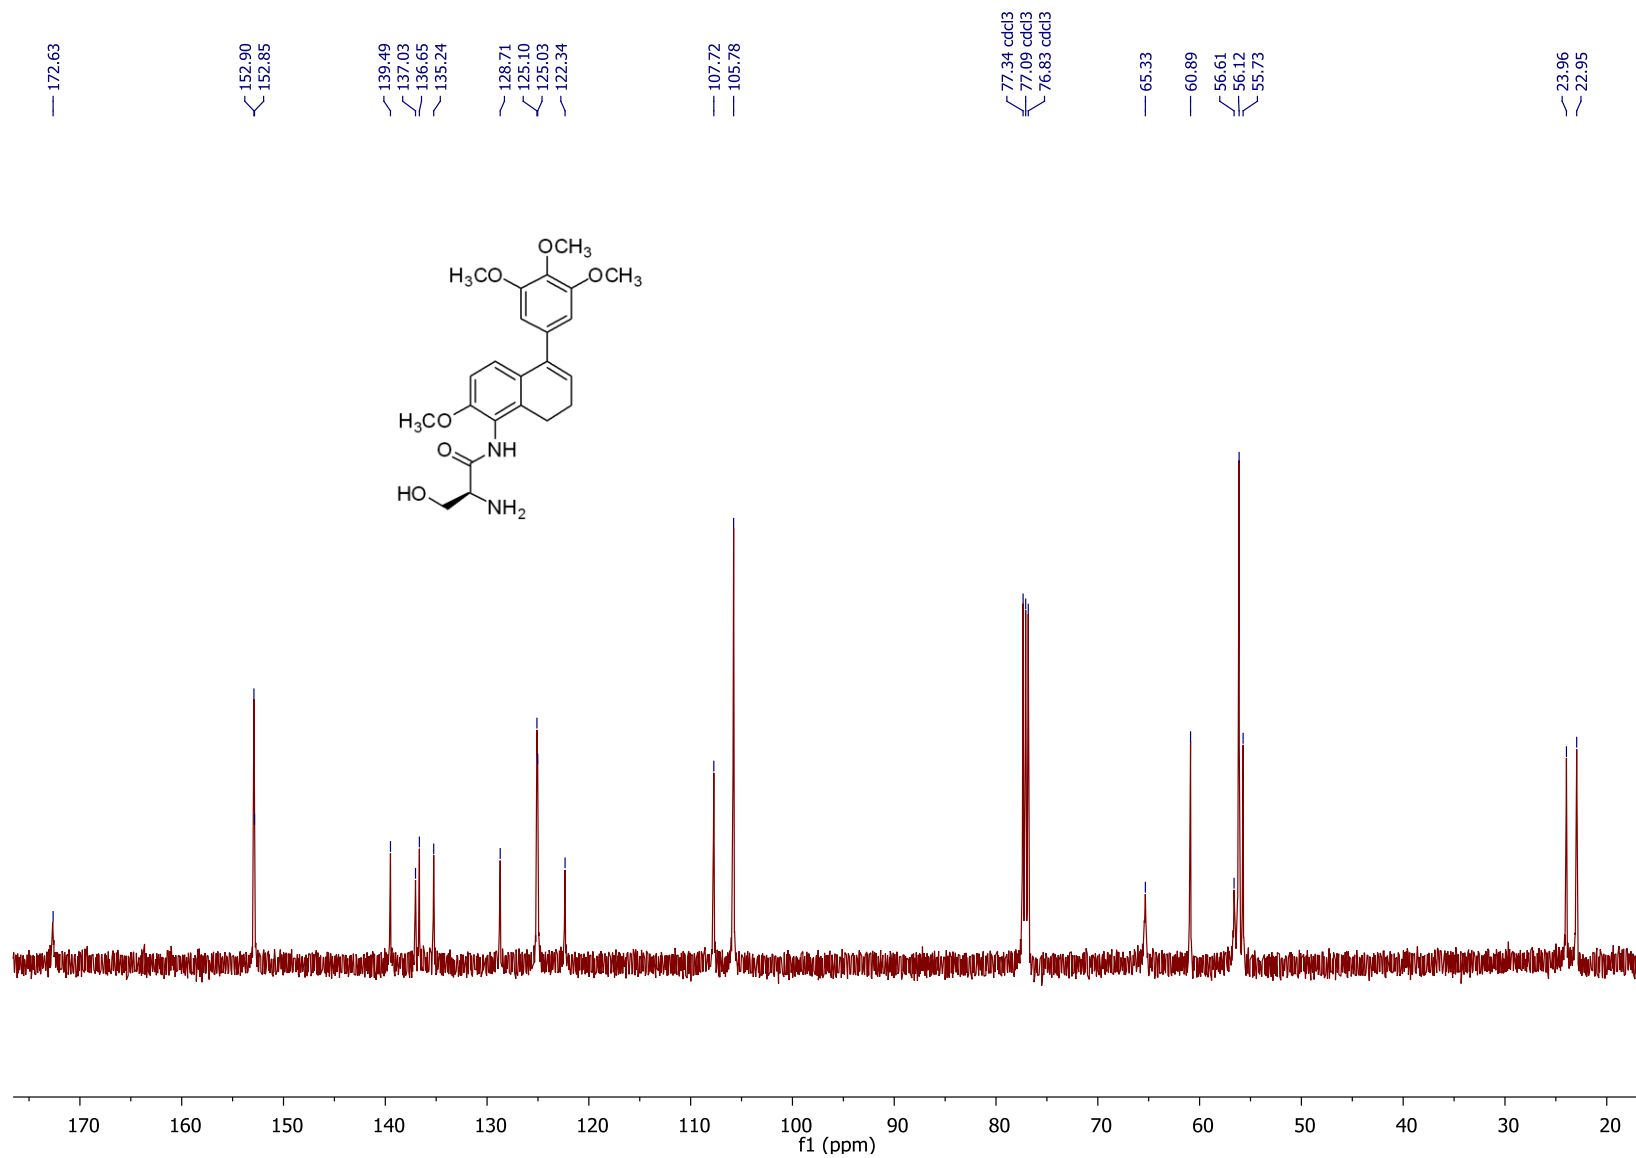

S165

# HRMS Compound 36

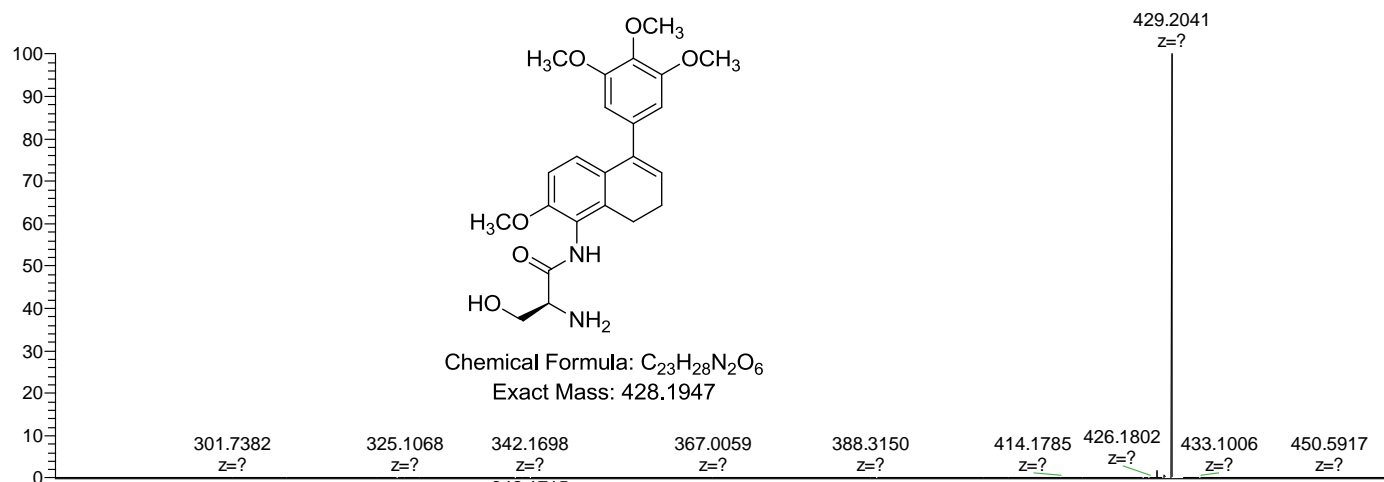

NL: 3.66E6  
CML\_1\_149\_MS^2\_raw\_Orb  
i\_+ESI\_+ESI#28 RT: 0.55  
AV: 1 T: FTMS + p ESI Full  
ms2 428.19@cid0.00  
[115.00-500.00]

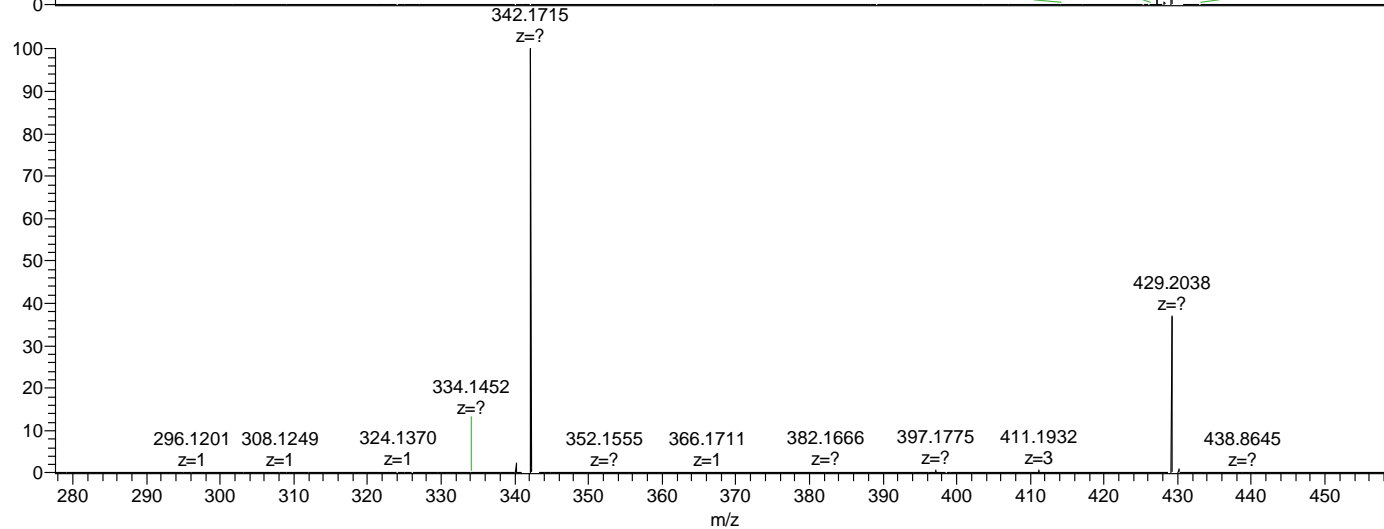

NL: 3.10E6  
cml\_1\_149\_ms\_fs\_raw\_orbi\_  
+esi\_+esi#29 RT: 0.54 AV:  
1 T: FTMS + p ESI Full ms2  
428.19@cid20.00  
[115.00-500.00]

# HPLC for Compound 36

Data File C:\CHEM32\1\DATA\ERIC LIN\1\_149\_RUN300015.D  
Sample Name: CML\_1\_149\_run3

=====  
Acq. Operator : ERIC LIN  
Acq. Instrument : Instrument 1 Location : -  
Injection Date : 8/6/2012 11:41:44 AM  
Acq. Method : C:\CHEM32\1\METHODS\MASTERMETHOD.M  
Last changed : 8/6/2012 11:35:23 AM by ERIC LIN  
(modified after loading)  
Analysis Method : C:\CHEM32\1\METHODS\MASTERMETHOD.M  
Last changed : 3/28/2012 11:50:33 AM by Erica P

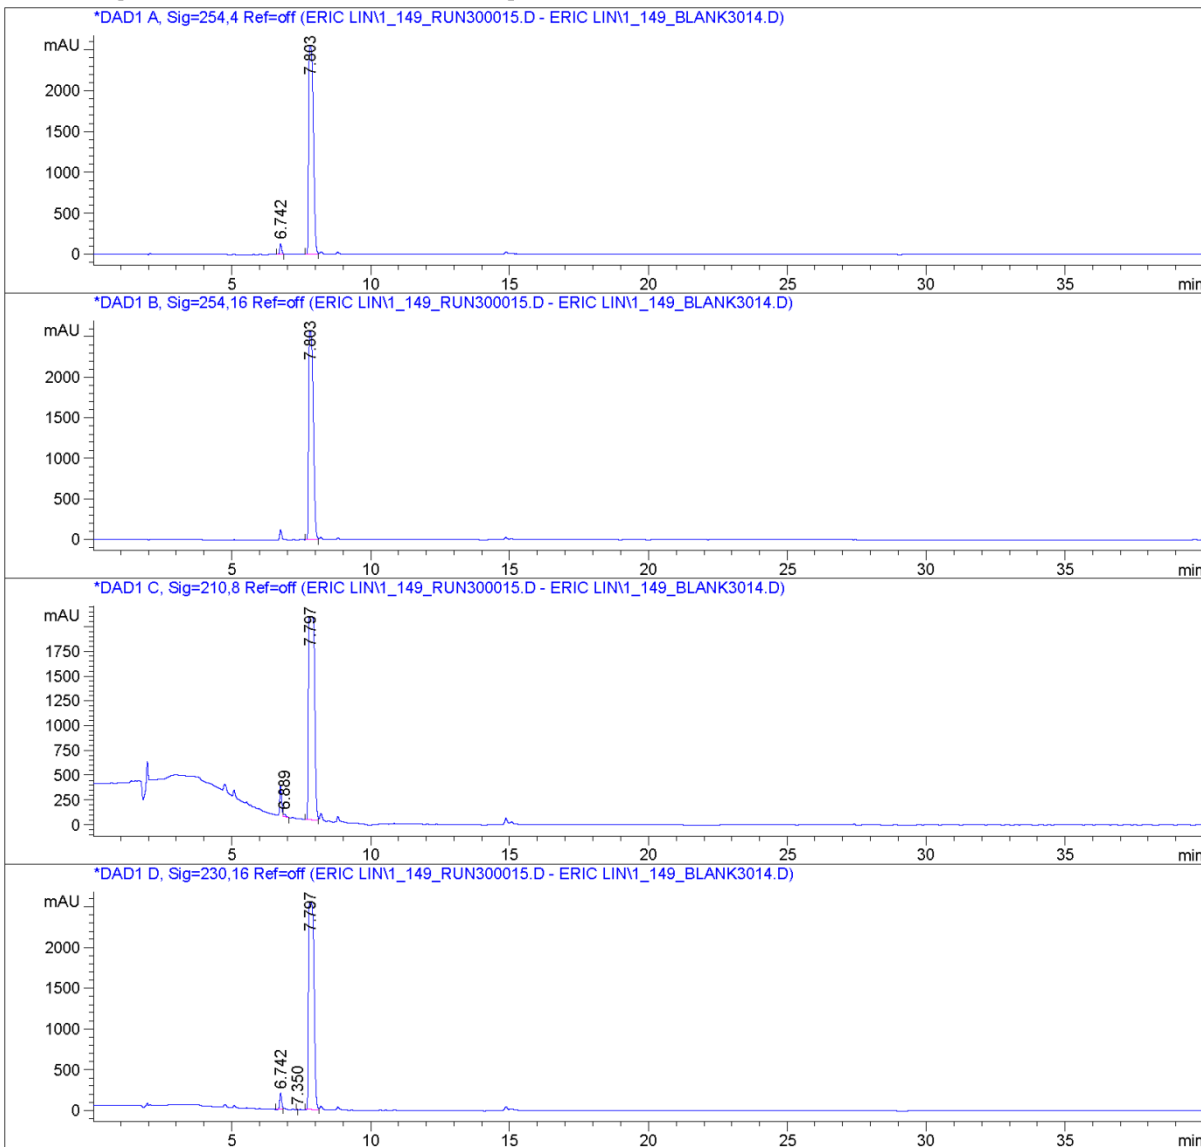

Data File C:\CHEM32\1\DATA\ERIC LIN\1\_149\_RUN300015.D  
Sample Name: CML\_1\_149\_run3

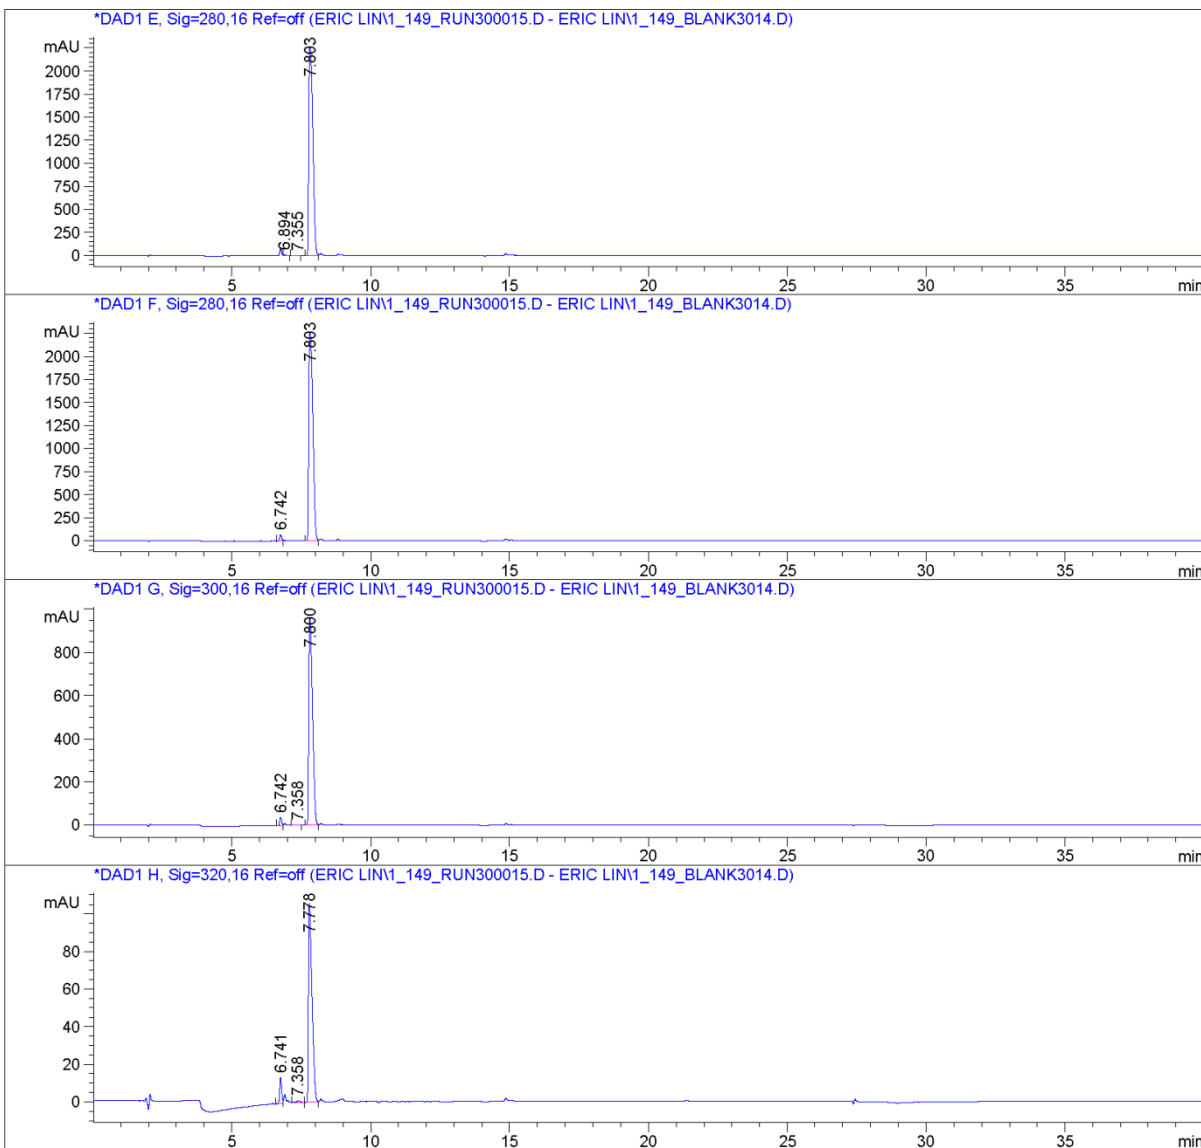

=====  
Area Percent Report  
=====

Sorted By : Signal  
Multiplier : 1.0000  
Dilution : 1.0000  
Use Multiplier & Dilution Factor with ISTDs



Data File C:\CHEM32\1\DATA\ERIC LIN\1\_149\_RUN300015.D  
Sample Name: CML\_1\_149\_run3

Signal 1: DAD1 A, Sig=254,4 Ref=off  
Signal has been modified after loading from rawdata file!

| Peak # | RetTime [min] | Type | Width [min] | Area [mAU*s] | Height [mAU] | Area %  |
|--------|---------------|------|-------------|--------------|--------------|---------|
| 1      | 6.742         | VV   | 0.0717      | 625.44885    | 131.10748    | 2.0644  |
| 2      | 7.803         | BV   | 0.1916      | 2.96707e4    | 2551.87720   | 97.9356 |

Totals : 3.02962e4 2682.98468

Signal 2: DAD1 B, Sig=254,16 Ref=off  
Signal has been modified after loading from rawdata file!

| Peak # | RetTime [min] | Type | Width [min] | Area [mAU*s] | Height [mAU] | Area %   |
|--------|---------------|------|-------------|--------------|--------------|----------|
| 1      | 7.803         | BV   | 0.1880      | 2.95208e4    | 2569.66016   | 100.0000 |

Totals : 2.95208e4 2569.66016

Signal 3: DAD1 C, Sig=210,8 Ref=off  
Signal has been modified after loading from rawdata file!

| Peak # | RetTime [min] | Type | Width [min] | Area [mAU*s] | Height [mAU] | Area %  |
|--------|---------------|------|-------------|--------------|--------------|---------|
| 1      | 6.889         | VB   | 0.0780      | 144.33923    | 27.16252     | 0.4637  |
| 2      | 7.797         | BV   | 0.2001      | 3.09806e4    | 2052.53906   | 99.5363 |

Totals : 3.11250e4 2079.70159

Signal 4: DAD1 D, Sig=230,16 Ref=off  
Signal has been modified after loading from rawdata file!

| Peak # | RetTime [min] | Type | Width [min] | Area [mAU*s] | Height [mAU] | Area %  |
|--------|---------------|------|-------------|--------------|--------------|---------|
| 1      | 6.742         | BV   | 0.0721      | 968.08734    | 201.15717    | 2.7443  |
| 2      | 7.350         | VV   | 0.0622      | 9.36047      | 2.17735      | 0.0265  |
| 3      | 7.797         | BV   | 0.2211      | 3.42987e4    | 2547.35425   | 97.2292 |

Totals : 3.52762e4 2750.68876

Data File C:\CHEM32\1\DATA\ERIC LIN\1\_149\_RUN300015.D  
Sample Name: CML\_1\_149\_run3

Signal 5: DAD1 E, Sig=280,16 Ref=off  
Signal has been modified after loading from rawdata file!

| Peak # | RetTime [min] | Type | Width [min] | Area [mAU*s] | Height [mAU] | Area %  |
|--------|---------------|------|-------------|--------------|--------------|---------|
| 1      | 6.894         | VB   | 0.0813      | 45.02870     | 8.04697      | 0.1943  |
| 2      | 7.355         | BV   | 0.1814      | 15.41385     | 1.07444      | 0.0665  |
| 3      | 7.803         | BV   | 0.1693      | 2.31112e4    | 2259.27368   | 99.7392 |

Totals :                                   2.31717e4 2268.39509

Signal 6: DAD1 F, Sig=280,16 Ref=off  
Signal has been modified after loading from rawdata file!

| Peak # | RetTime [min] | Type | Width [min] | Area [mAU*s] | Height [mAU] | Area %  |
|--------|---------------|------|-------------|--------------|--------------|---------|
| 1      | 6.742         | BV   | 0.0718      | 337.84677    | 70.68241     | 1.4408  |
| 2      | 7.803         | BV   | 0.1693      | 2.31112e4    | 2259.27368   | 98.5592 |

Totals :                                   2.34491e4 2329.95609

Signal 7: DAD1 G, Sig=300,16 Ref=off  
Signal has been modified after loading from rawdata file!

| Peak # | RetTime [min] | Type | Width [min] | Area [mAU*s] | Height [mAU] | Area %  |
|--------|---------------|------|-------------|--------------|--------------|---------|
| 1      | 6.742         | BV   | 0.0715      | 176.22855    | 37.06408     | 1.9206  |
| 2      | 7.358         | VV   | 0.1462      | 16.24239     | 1.45576      | 0.1770  |
| 3      | 7.800         | BV   | 0.1471      | 8983.08105   | 960.55737    | 97.9024 |

Totals :                                   9175.55199 999.07721

Signal 8: DAD1 H, Sig=320,16 Ref=off  
Signal has been modified after loading from rawdata file!

| Peak # | RetTime [min] | Type | Width [min] | Area [mAU*s] | Height [mAU] | Area %  |
|--------|---------------|------|-------------|--------------|--------------|---------|
| 1      | 6.741         | BV   | 0.0729      | 65.90073     | 14.00128     | 6.4953  |
| 2      | 7.358         | VB   | 0.1497      | 12.81287     | 1.11823      | 1.2629  |
| 3      | 7.778         | BV   | 0.1271      | 935.87689    | 105.88159    | 92.2418 |

Totals :                                   1014.59050 121.00111

Data File C:\CHEM32\1\DATA\ERIC LIN\1\_149\_RUN300015.D  
Sample Name: CML\_1\_149\_run3

=====  
\*\*\* End of Report \*\*\*

<sup>1</sup>H NMR (CDCl<sub>3</sub>, 500 MHz) Compound 37

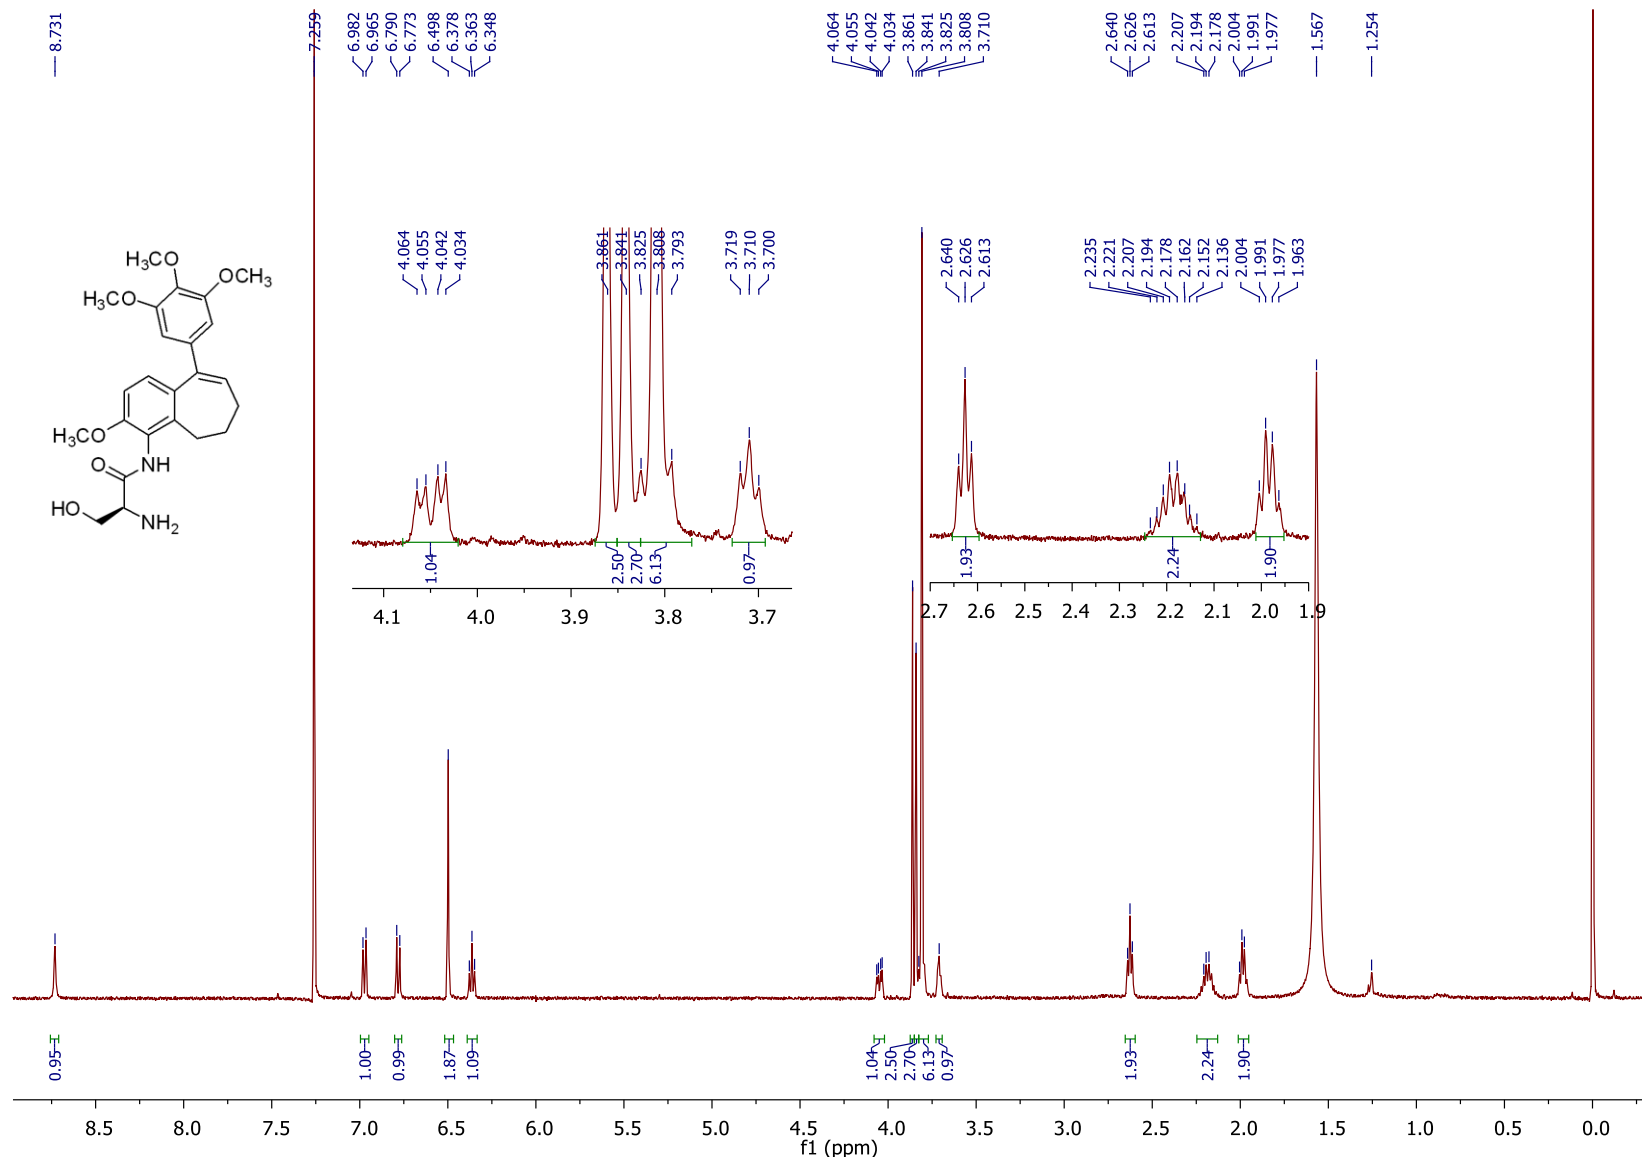

<sup>13</sup>C NMR (CDCl<sub>3</sub>, 125 MHz) Compound **37**

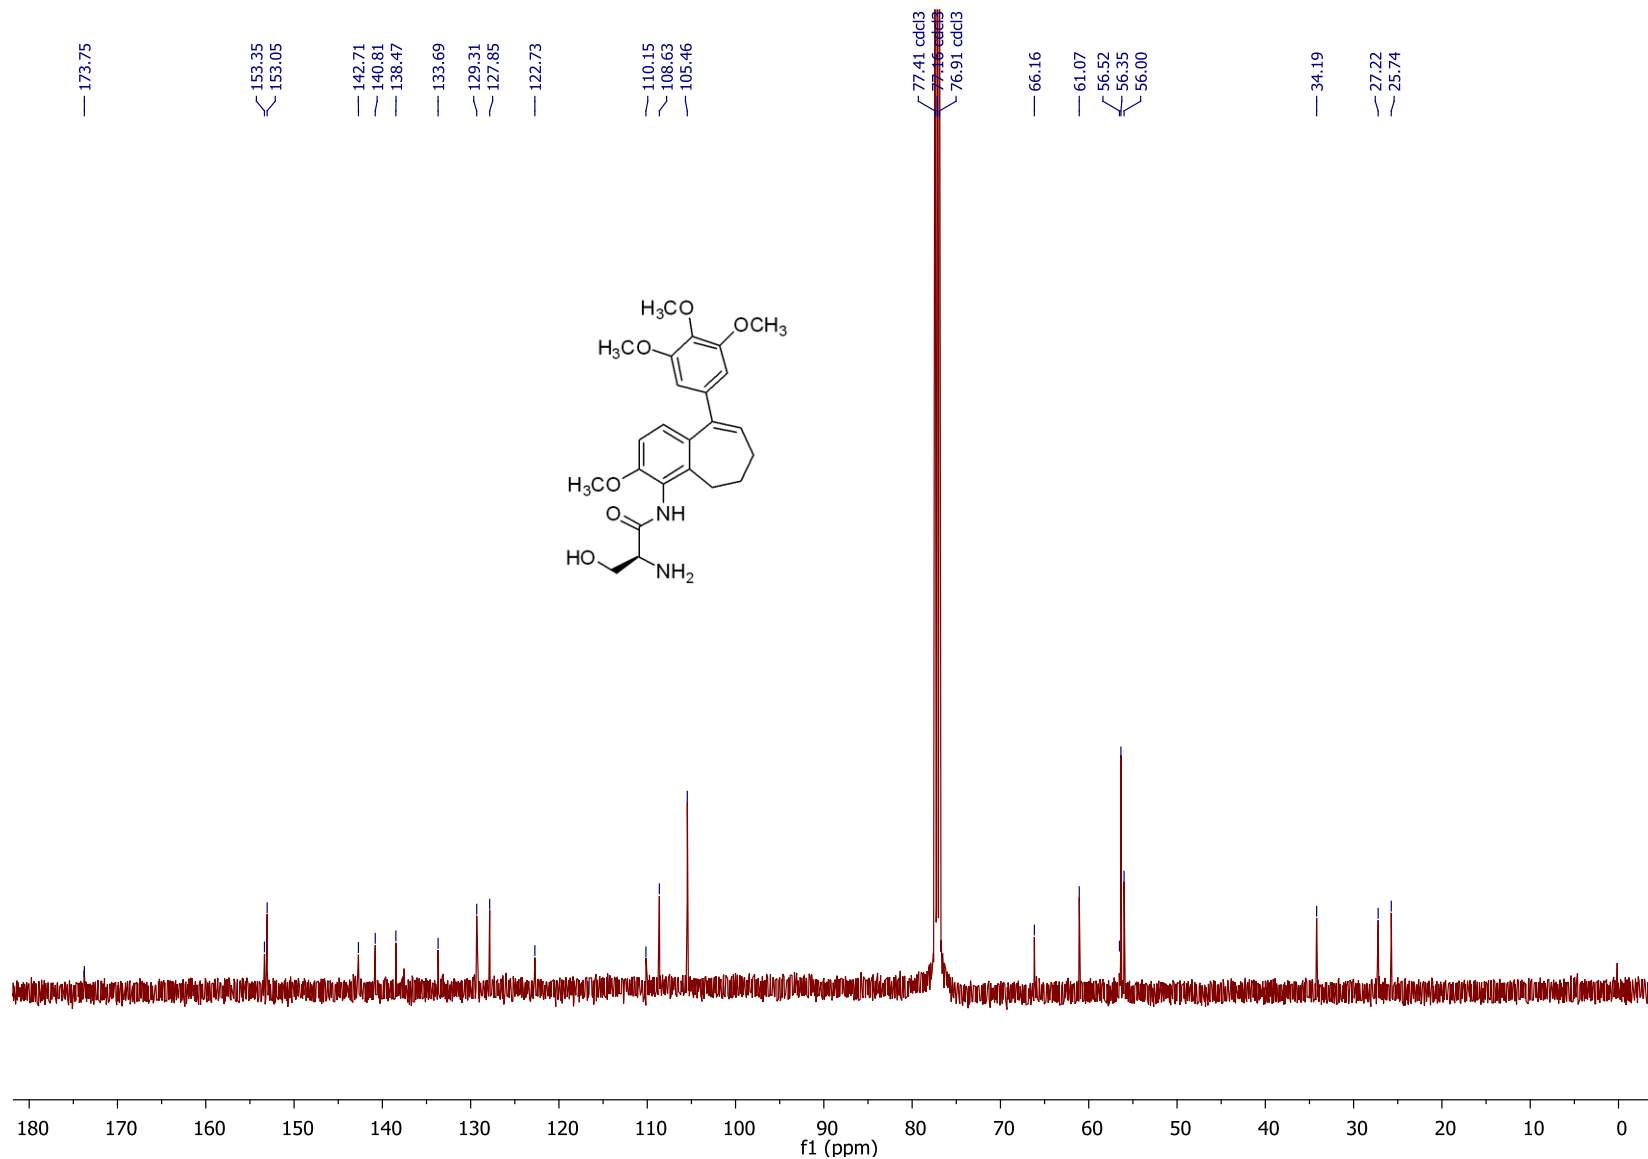

S173

# HRMS Compound 37

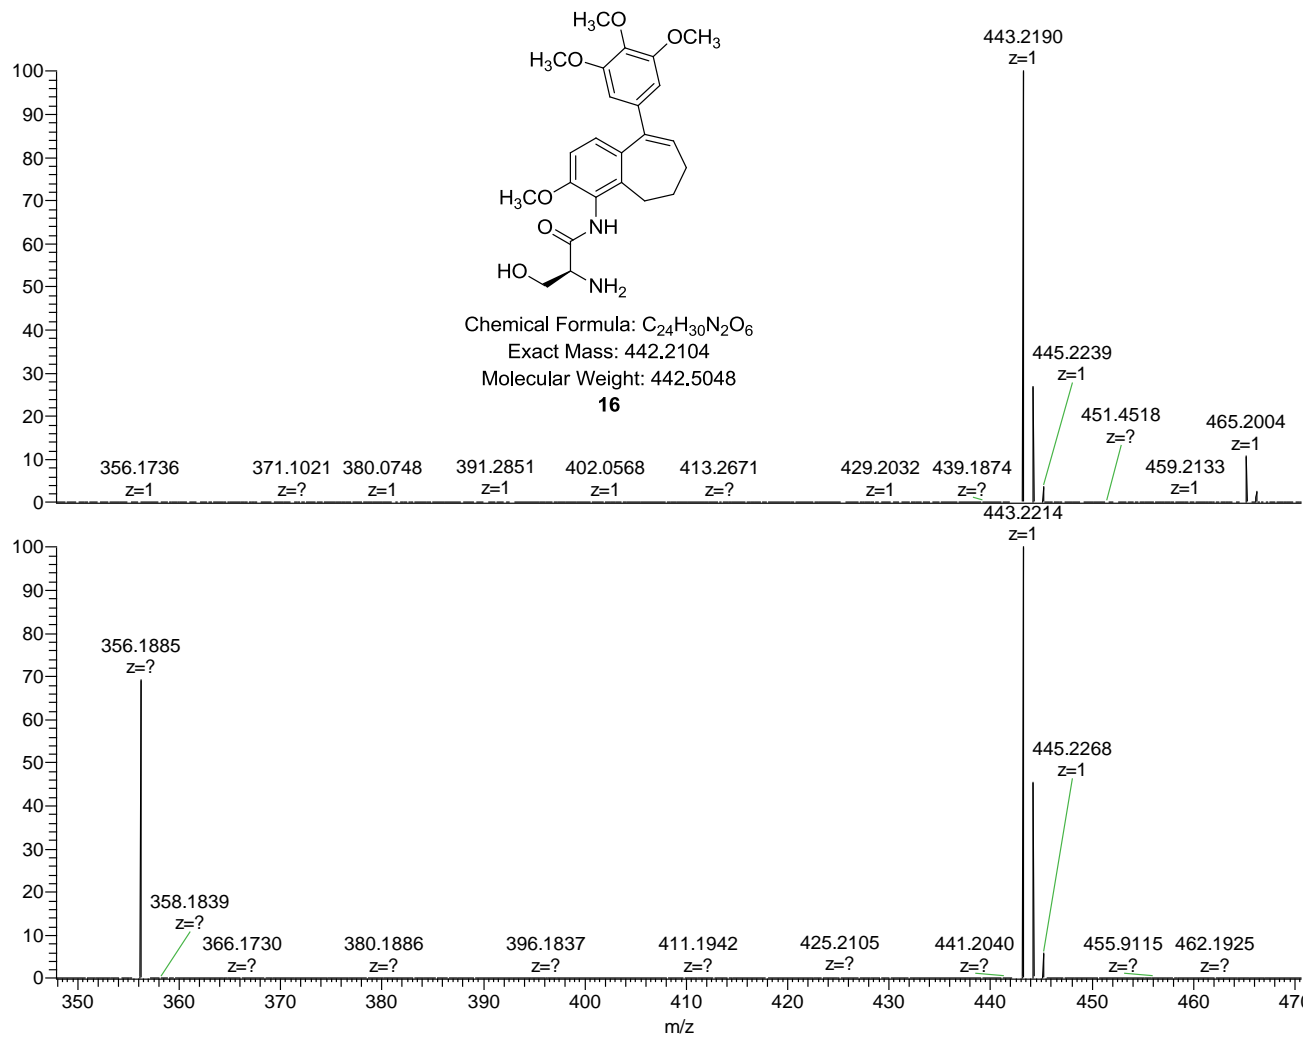

# HPLC for Compound 37

Data File C:\CHEM32\1\DATA\ERIC LIN\II\_005\_RUN10007.D

Sample Name: CML\_II\_005\_run1

```
=====
Acq. Operator   : ERIC LIN
Acq. Instrument : Instrument 1                      Location : -
Injection Date  : 8/26/2012 6:28:39 PM
Acq. Method     : C:\CHEM32\1\METHODS\MASTERMETHOD.M
Last changed    : 8/26/2012 6:29:45 PM by ERIC LIN
                  (modified after loading)
Analysis Method : C:\CHEM32\1\DATA\ERIC LIN\II_005_RUN10007.D\DA.M (MASTERMETHOD.M)
Last changed    : 8/26/2012 8:08:08 PM by ERIC LIN
Sample Info     :
```

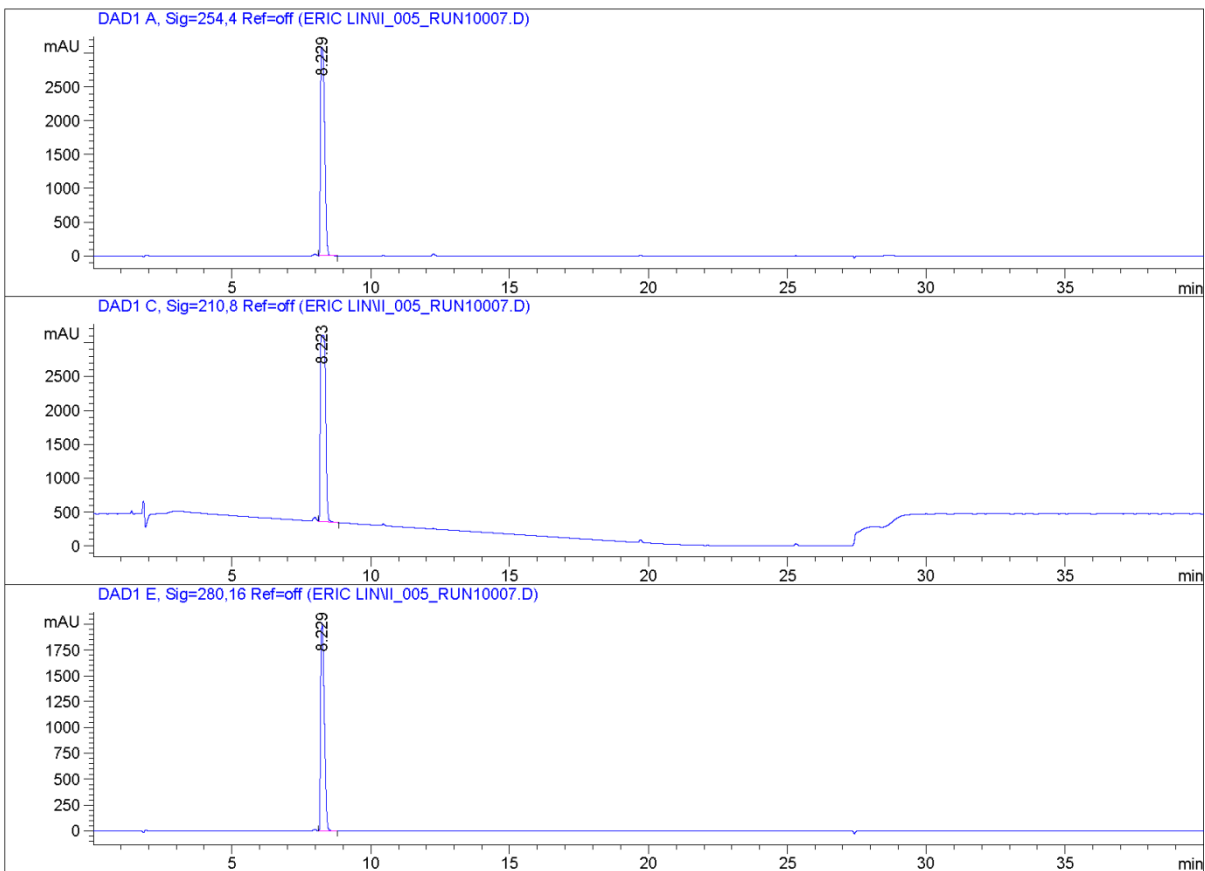

Data File C:\CHEM32\1\DATA\ERIC LIN\II\_005\_RUN10007.D  
Sample Name: CML\_II\_005\_run1

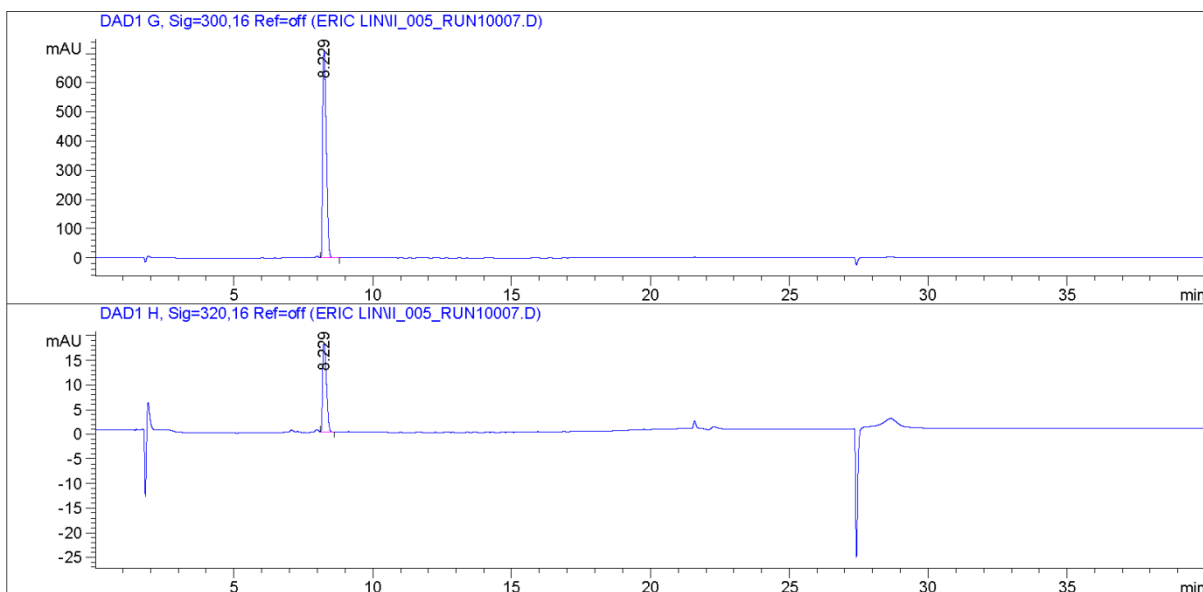

=====  
Area Percent Report  
=====

Sorted By : Signal  
Multiplier : 1.0000  
Dilution : 1.0000  
Use Multiplier & Dilution Factor with ISTDs

Signal 1: DAD1 A, Sig=254,4 Ref=off

| Peak # | RetTime [min] | Type | Width [min] | Area [mAU*s] | Height [mAU] | Area %   |
|--------|---------------|------|-------------|--------------|--------------|----------|
| 1      | 8.229         | VV   | 0.1674      | 3.16497e4    | 3092.45068   | 100.0000 |

Totals : 3.16497e4 3092.45068

Signal 2: DAD1 C, Sig=210,8 Ref=off

| Peak # | RetTime [min] | Type | Width [min] | Area [mAU*s] | Height [mAU] | Area %   |
|--------|---------------|------|-------------|--------------|--------------|----------|
| 1      | 8.223         | VV   | 0.1718      | 3.58401e4    | 2754.71655   | 100.0000 |

Totals : 3.58401e4 2754.71655



Data File C:\CHEM32\1\DATA\ERIC LIN\II\_005\_RUN10007.D  
Sample Name: CML\_II\_005\_run1

Signal 3: DAD1 E, Sig=280,16 Ref=off

| Peak # | RetTime [min] | Type | Width [min] | Area [mAU*s] | Height [mAU] | Area %   |
|--------|---------------|------|-------------|--------------|--------------|----------|
| 1      | 8.229         | VV   | 0.1462      | 1.83095e4    | 2011.87817   | 100.0000 |

Totals :                   1.83095e4  2011.87817

Signal 4: DAD1 G, Sig=300,16 Ref=off

| Peak # | RetTime [min] | Type | Width [min] | Area [mAU*s] | Height [mAU] | Area %   |
|--------|---------------|------|-------------|--------------|--------------|----------|
| 1      | 8.229         | VB   | 0.1406      | 6393.18701   | 712.86285    | 100.0000 |

Totals :                   6393.18701  712.86285

Signal 5: DAD1 H, Sig=320,16 Ref=off

| Peak # | RetTime [min] | Type | Width [min] | Area [mAU*s] | Height [mAU] | Area %   |
|--------|---------------|------|-------------|--------------|--------------|----------|
| 1      | 8.229         | VB   | 0.1486      | 169.87639    | 18.24767     | 100.0000 |

Totals :                   169.87639  18.24767

=====  
\*\*\* End of Report \*\*\*

<sup>1</sup>H NMR (CD<sub>3</sub>OD, 500 MHz) Compound **38**

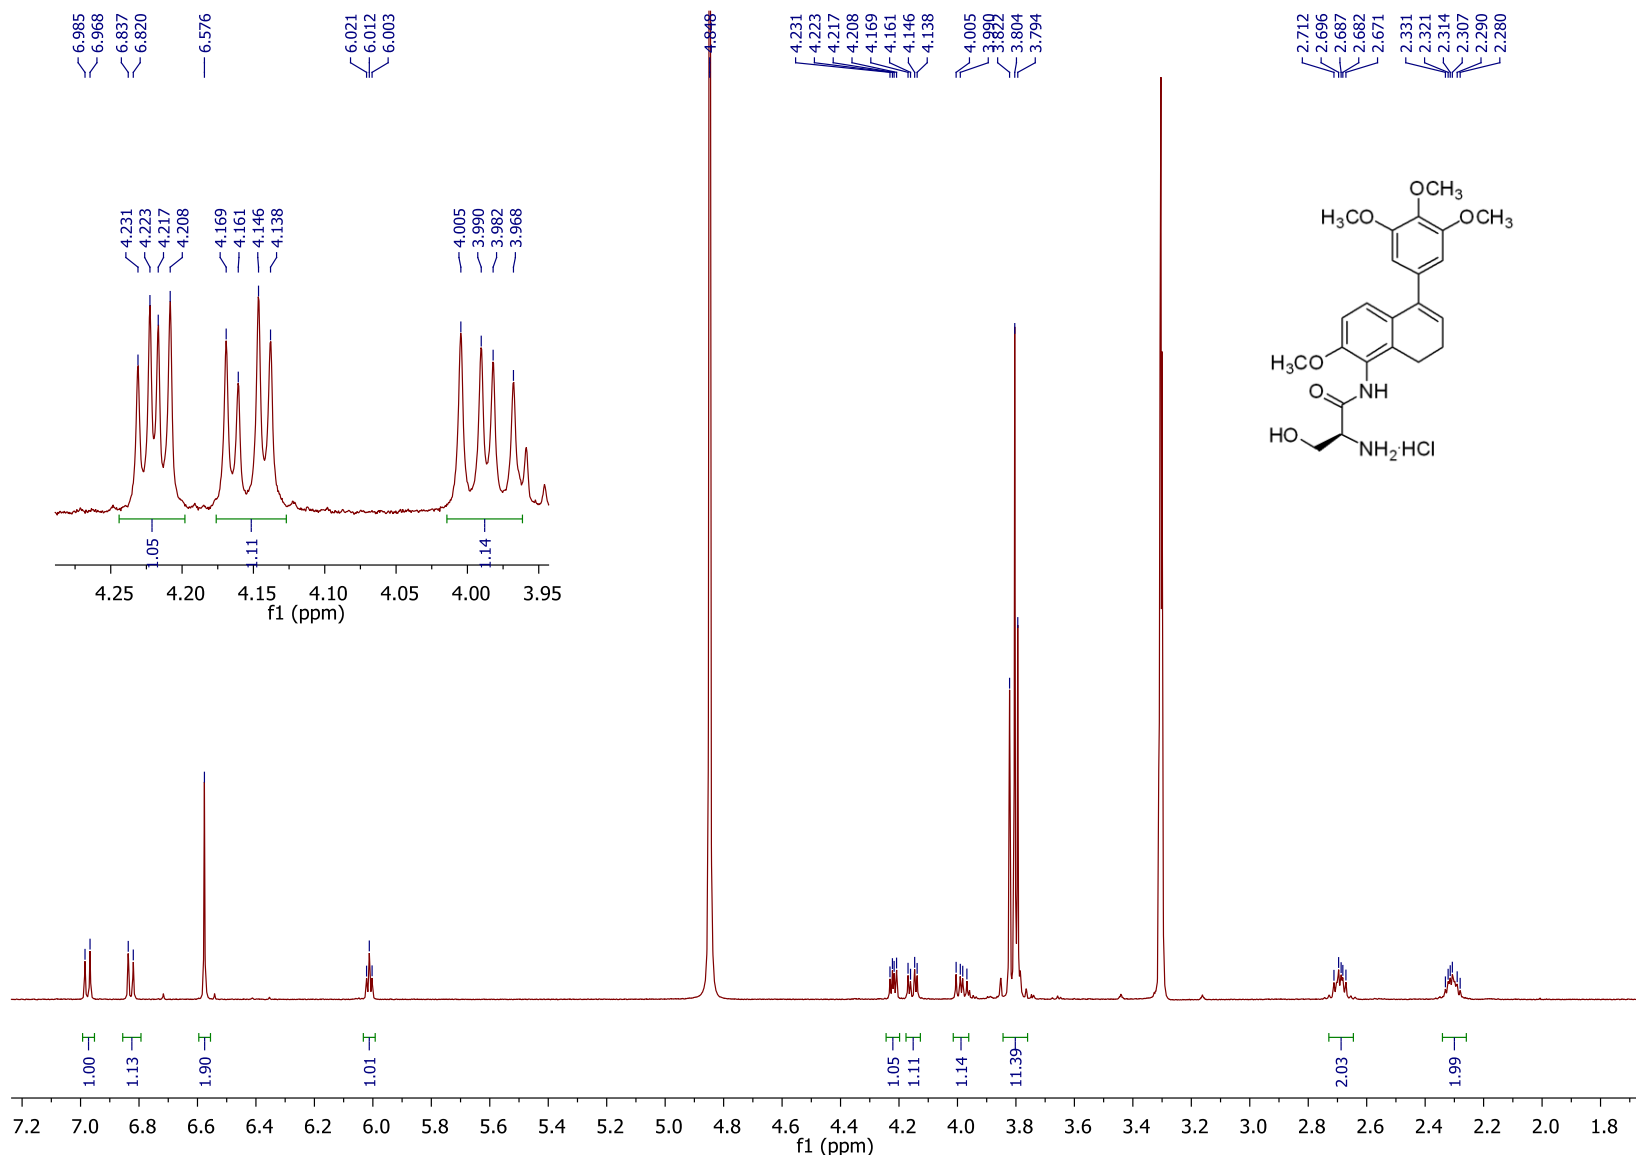

<sup>13</sup>C NMR (CD<sub>3</sub>OD, 125 MHz) Compound **38**

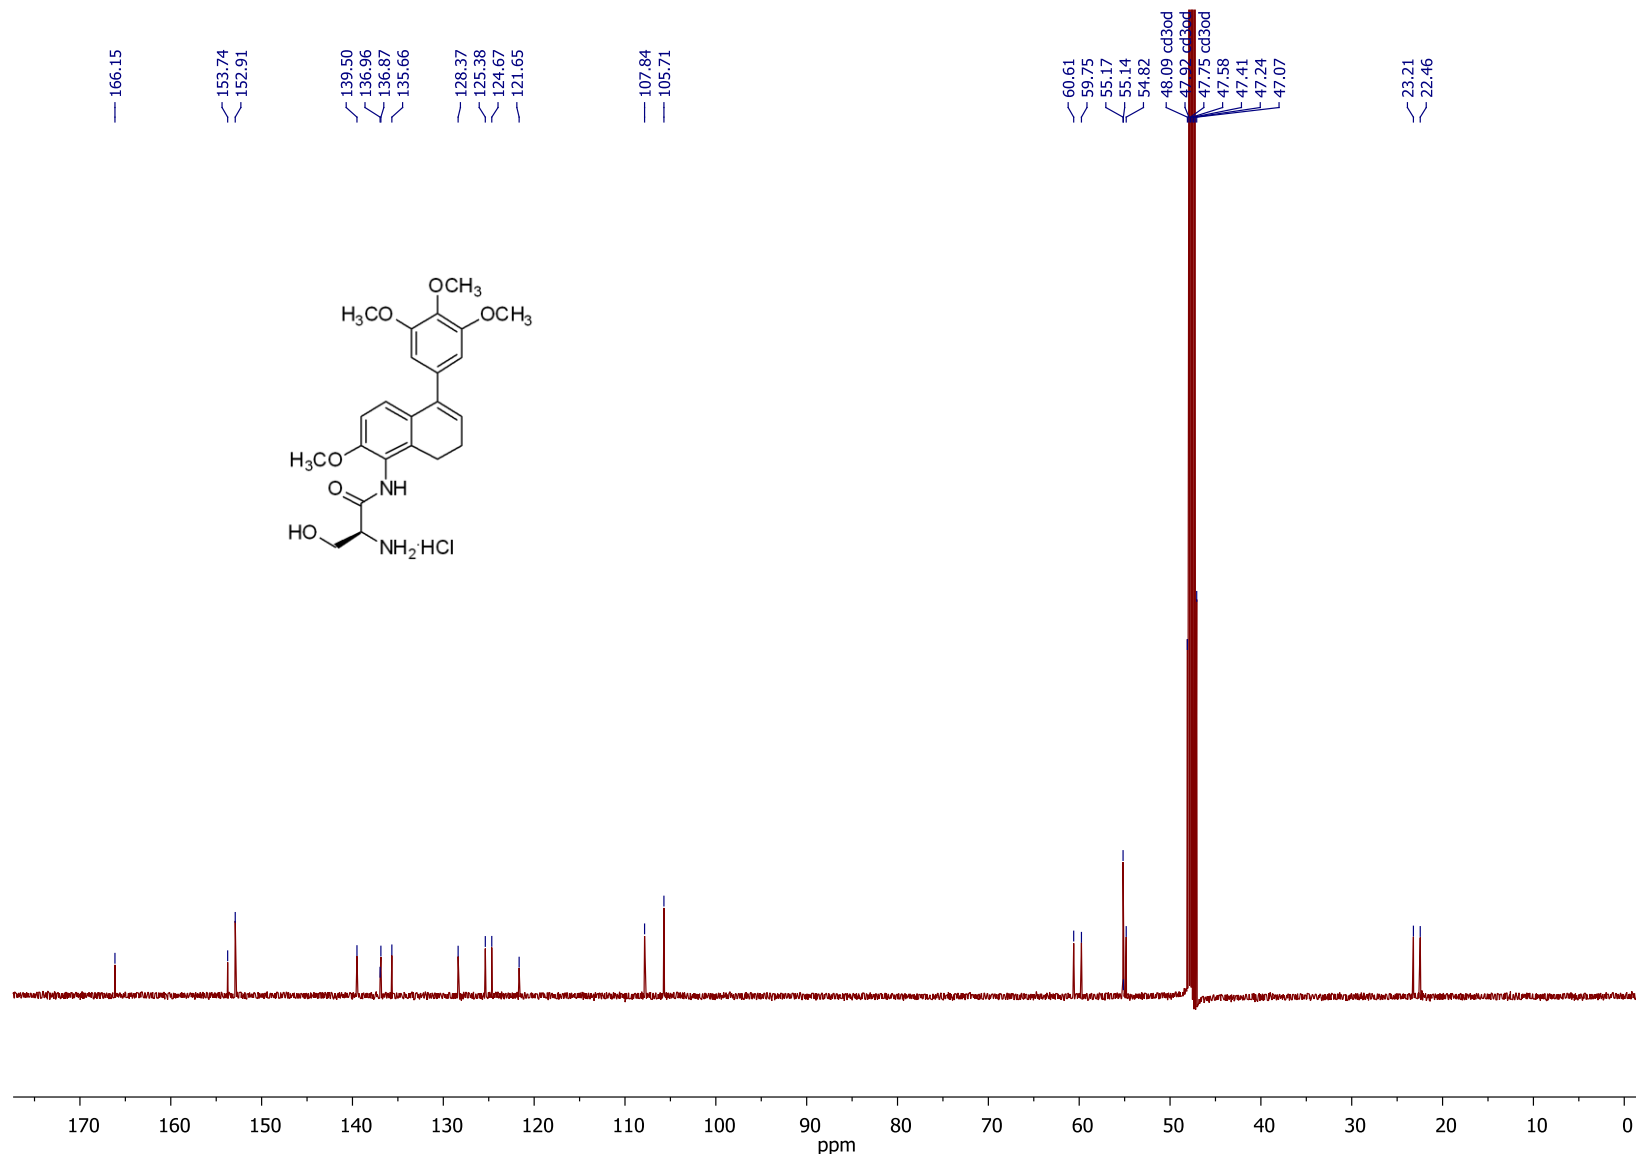

# HRMS Compound 38

CML\_II\_015\_MS^2\_raw\_ORBI\_+ESI#7-41 RT: 0.06-0.35 AV: 35 NL: 3.85E7  
T: FTMS + p ESI Full ms [150.00-2000.00]

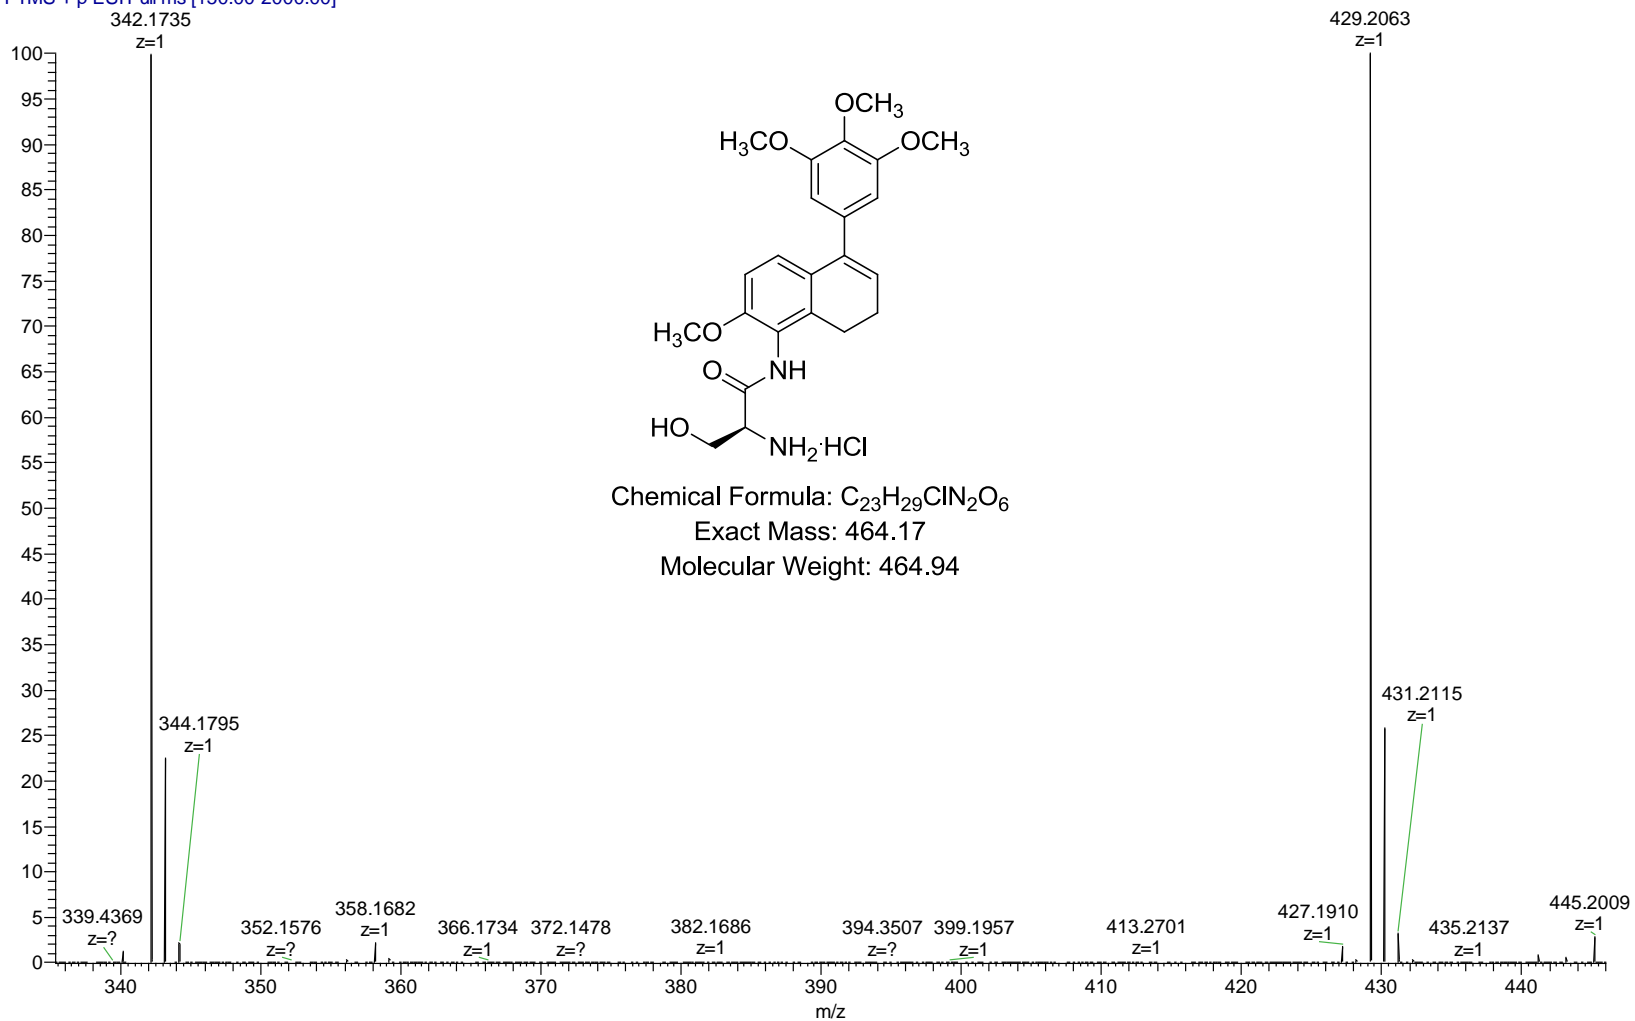

# HPLC for Compound 38

Data File C:\CHEM32\1\DATA\ERIC LIN\1\_153\_RUN100017.D  
Sample Name: CML\_1\_153\_run1

=====  
Acq. Operator : ERIC LIN  
Acq. Instrument : Instrument 1 Location : -  
Injection Date : 8/6/2012 1:58:05 PM  
Acq. Method : C:\CHEM32\1\METHODS\MASTERMETHOD.M  
Last changed : 8/6/2012 1:47:21 PM by ERIC LIN  
(modified after loading)  
Analysis Method : C:\CHEM32\1\METHODS\MASTERMETHOD.M  
Last changed : 8/6/2012 1:00:08 PM by ERIC LIN  
(modified after loading)

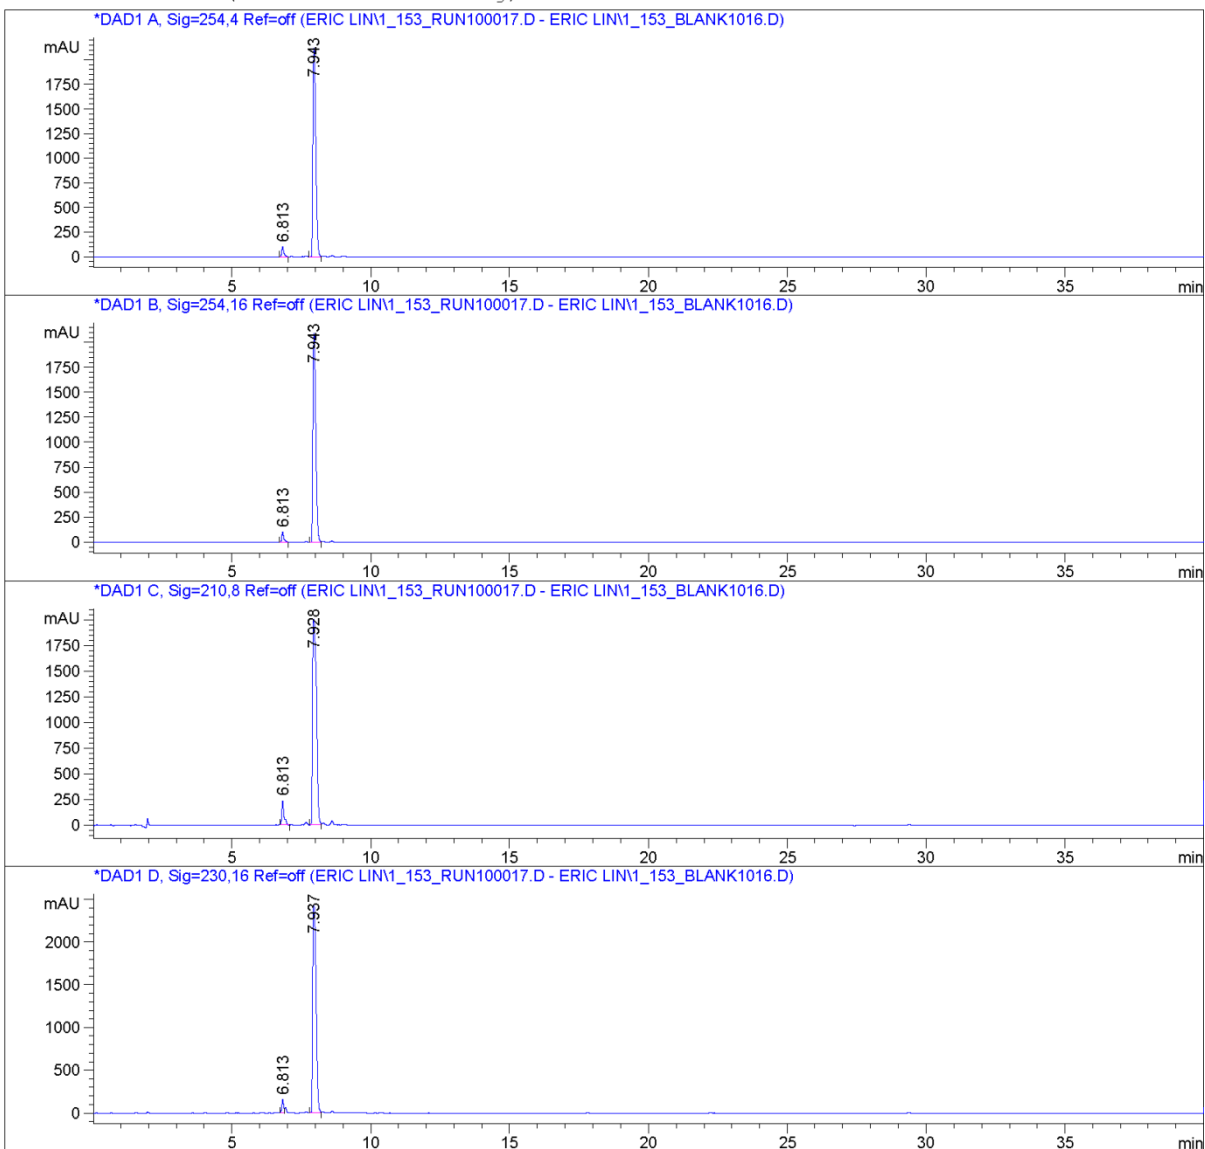

Data File C:\CHEM32\1\DATA\ERIC LIN\1\_153\_RUN100017.D  
Sample Name: CML\_1\_153\_run1

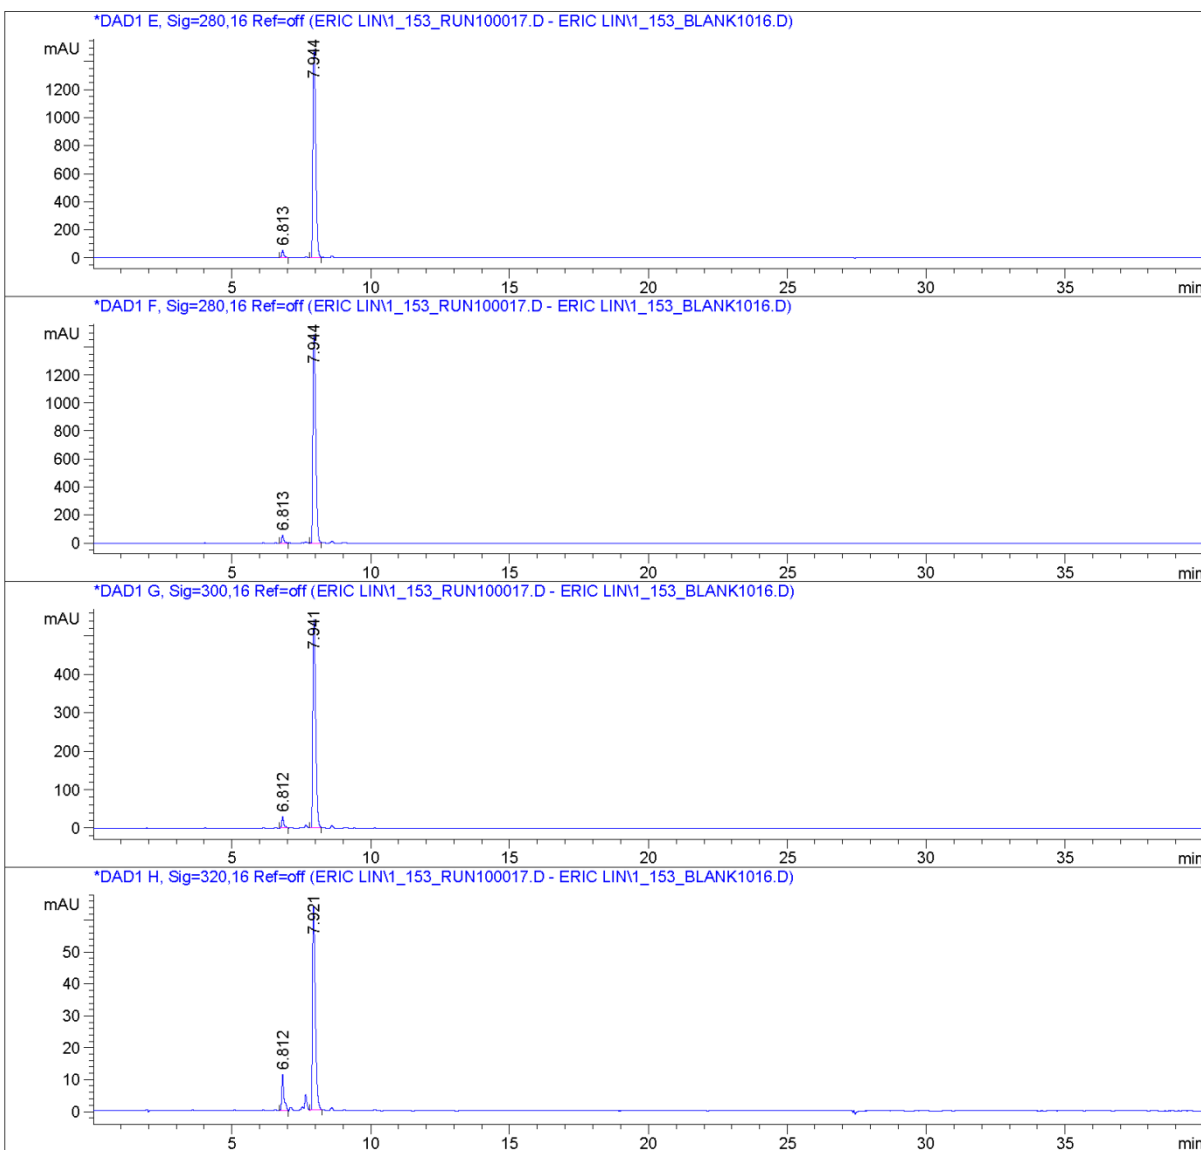

=====  
Area Percent Report  
=====

Sorted By : Signal  
Multiplier : 1.0000  
Dilution : 1.0000  
Use Multiplier & Dilution Factor with ISTDs

Data File C:\CHEM32\1\DATA\ERIC LIN\1\_153\_RUN100017.D  
Sample Name: CML\_1\_153\_run1

Signal 1: DAD1 A, Sig=254,4 Ref=off  
Signal has been modified after loading from rawdata file!

| Peak # | RetTime [min] | Type | Width [min] | Area [mAU*s] | Height [mAU] | Area %  |
|--------|---------------|------|-------------|--------------|--------------|---------|
| 1      | 6.813         | BV   | 0.0760      | 537.58142    | 104.52646    | 3.3615  |
| 2      | 7.943         | BV   | 0.1131      | 1.54548e4    | 2117.94653   | 96.6385 |

Totals : 1.59924e4 2222.47299

Signal 2: DAD1 B, Sig=254,16 Ref=off  
Signal has been modified after loading from rawdata file!

| Peak # | RetTime [min] | Type | Width [min] | Area [mAU*s] | Height [mAU] | Area %  |
|--------|---------------|------|-------------|--------------|--------------|---------|
| 1      | 6.813         | BV   | 0.0777      | 540.95929    | 102.36874    | 3.4391  |
| 2      | 7.943         | BV   | 0.1128      | 1.51888e4    | 2089.05884   | 96.5609 |

Totals : 1.57297e4 2191.42757

Signal 3: DAD1 C, Sig=210,8 Ref=off  
Signal has been modified after loading from rawdata file!

| Peak # | RetTime [min] | Type | Width [min] | Area [mAU*s] | Height [mAU] | Area %  |
|--------|---------------|------|-------------|--------------|--------------|---------|
| 1      | 6.813         | VV   | 0.0816      | 1336.63696   | 237.73367    | 6.3785  |
| 2      | 7.928         | BV   | 0.1420      | 1.96189e4    | 2007.60486   | 93.6215 |

Totals : 2.09555e4 2245.33853

Signal 4: DAD1 D, Sig=230,16 Ref=off  
Signal has been modified after loading from rawdata file!

| Peak # | RetTime [min] | Type | Width [min] | Area [mAU*s] | Height [mAU] | Area %  |
|--------|---------------|------|-------------|--------------|--------------|---------|
| 1      | 6.813         | VV   | 0.0693      | 728.46539    | 159.36909    | 3.3904  |
| 2      | 7.937         | BV   | 0.1392      | 2.07575e4    | 2440.93188   | 96.6096 |

Totals : 2.14860e4 2600.30098

Data File C:\CHEM32\1\DATA\ERIC LIN\1\_153\_RUN100017.D  
Sample Name: CML\_1\_153\_run1

Signal 5: DAD1 E, Sig=280,16 Ref=off  
Signal has been modified after loading from rawdata file!

| Peak # | RetTime [min] | Type | Width [min] | Area [mAU*s] | Height [mAU] | Area %  |
|--------|---------------|------|-------------|--------------|--------------|---------|
| 1      | 6.813         | BV   | 0.0770      | 292.07108    | 55.82075     | 2.6804  |
| 2      | 7.944         | VV   | 0.1111      | 1.06043e4    | 1488.94983   | 97.3196 |

Totals : 1.08964e4 1544.77058

Signal 6: DAD1 F, Sig=280,16 Ref=off  
Signal has been modified after loading from rawdata file!

| Peak # | RetTime [min] | Type | Width [min] | Area [mAU*s] | Height [mAU] | Area %  |
|--------|---------------|------|-------------|--------------|--------------|---------|
| 1      | 6.813         | BV   | 0.0770      | 292.07108    | 55.82075     | 2.6804  |
| 2      | 7.944         | VV   | 0.1111      | 1.06043e4    | 1488.94983   | 97.3196 |

Totals : 1.08964e4 1544.77058

Signal 7: DAD1 G, Sig=300,16 Ref=off  
Signal has been modified after loading from rawdata file!

| Peak # | RetTime [min] | Type | Width [min] | Area [mAU*s] | Height [mAU] | Area %  |
|--------|---------------|------|-------------|--------------|--------------|---------|
| 1      | 6.812         | VV   | 0.0791      | 160.51169    | 29.68318     | 3.9846  |
| 2      | 7.941         | BV   | 0.1093      | 3867.79565   | 542.01520    | 96.0154 |

Totals : 4028.30734 571.69837

Signal 8: DAD1 H, Sig=320,16 Ref=off  
Signal has been modified after loading from rawdata file!

| Peak # | RetTime [min] | Type | Width [min] | Area [mAU*s] | Height [mAU] | Area %  |
|--------|---------------|------|-------------|--------------|--------------|---------|
| 1      | 6.812         | BB   | 0.0828      | 65.37932     | 11.41679     | 12.7347 |
| 2      | 7.921         | VB   | 0.1073      | 448.01462    | 64.29078     | 87.2653 |

Totals : 513.39394 75.70757

=====



<sup>1</sup>H NMR (CD<sub>3</sub>OD, 500 MHz) Compound **39**

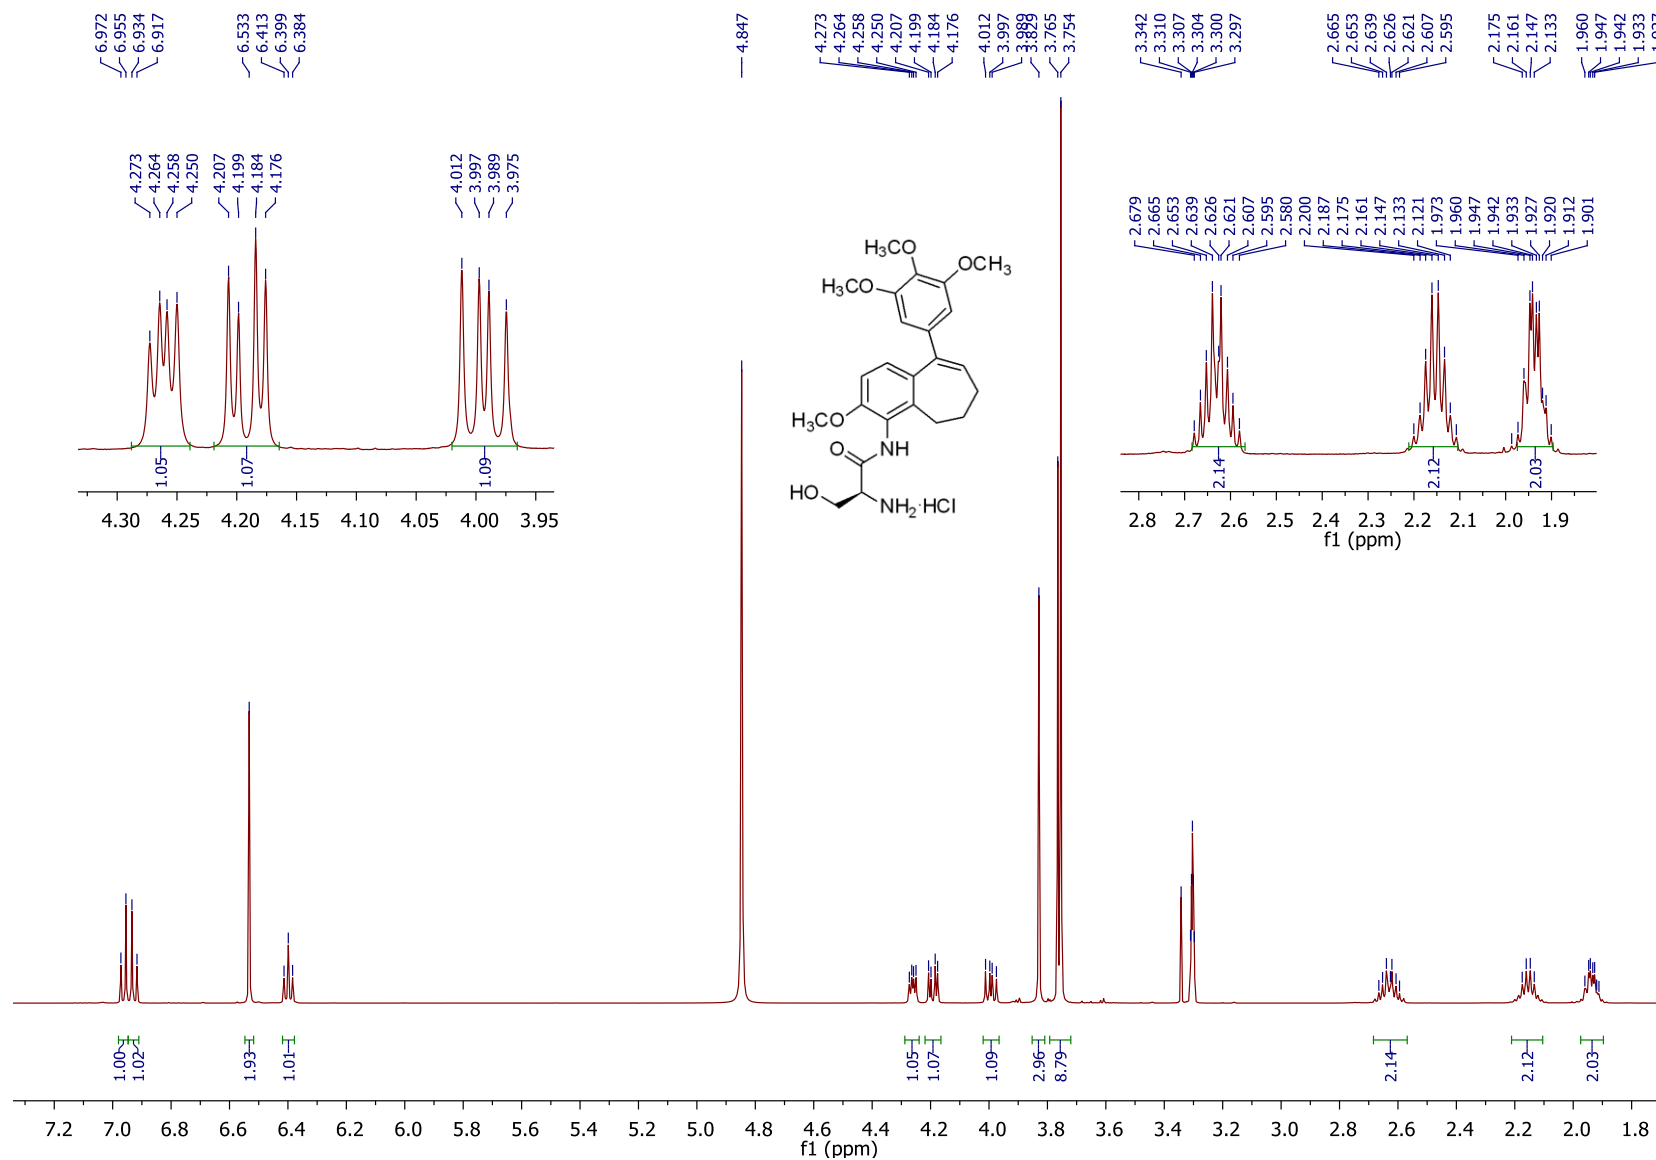

<sup>13</sup>C NMR (CD<sub>3</sub>OD, 125 MHz) Compound **39**

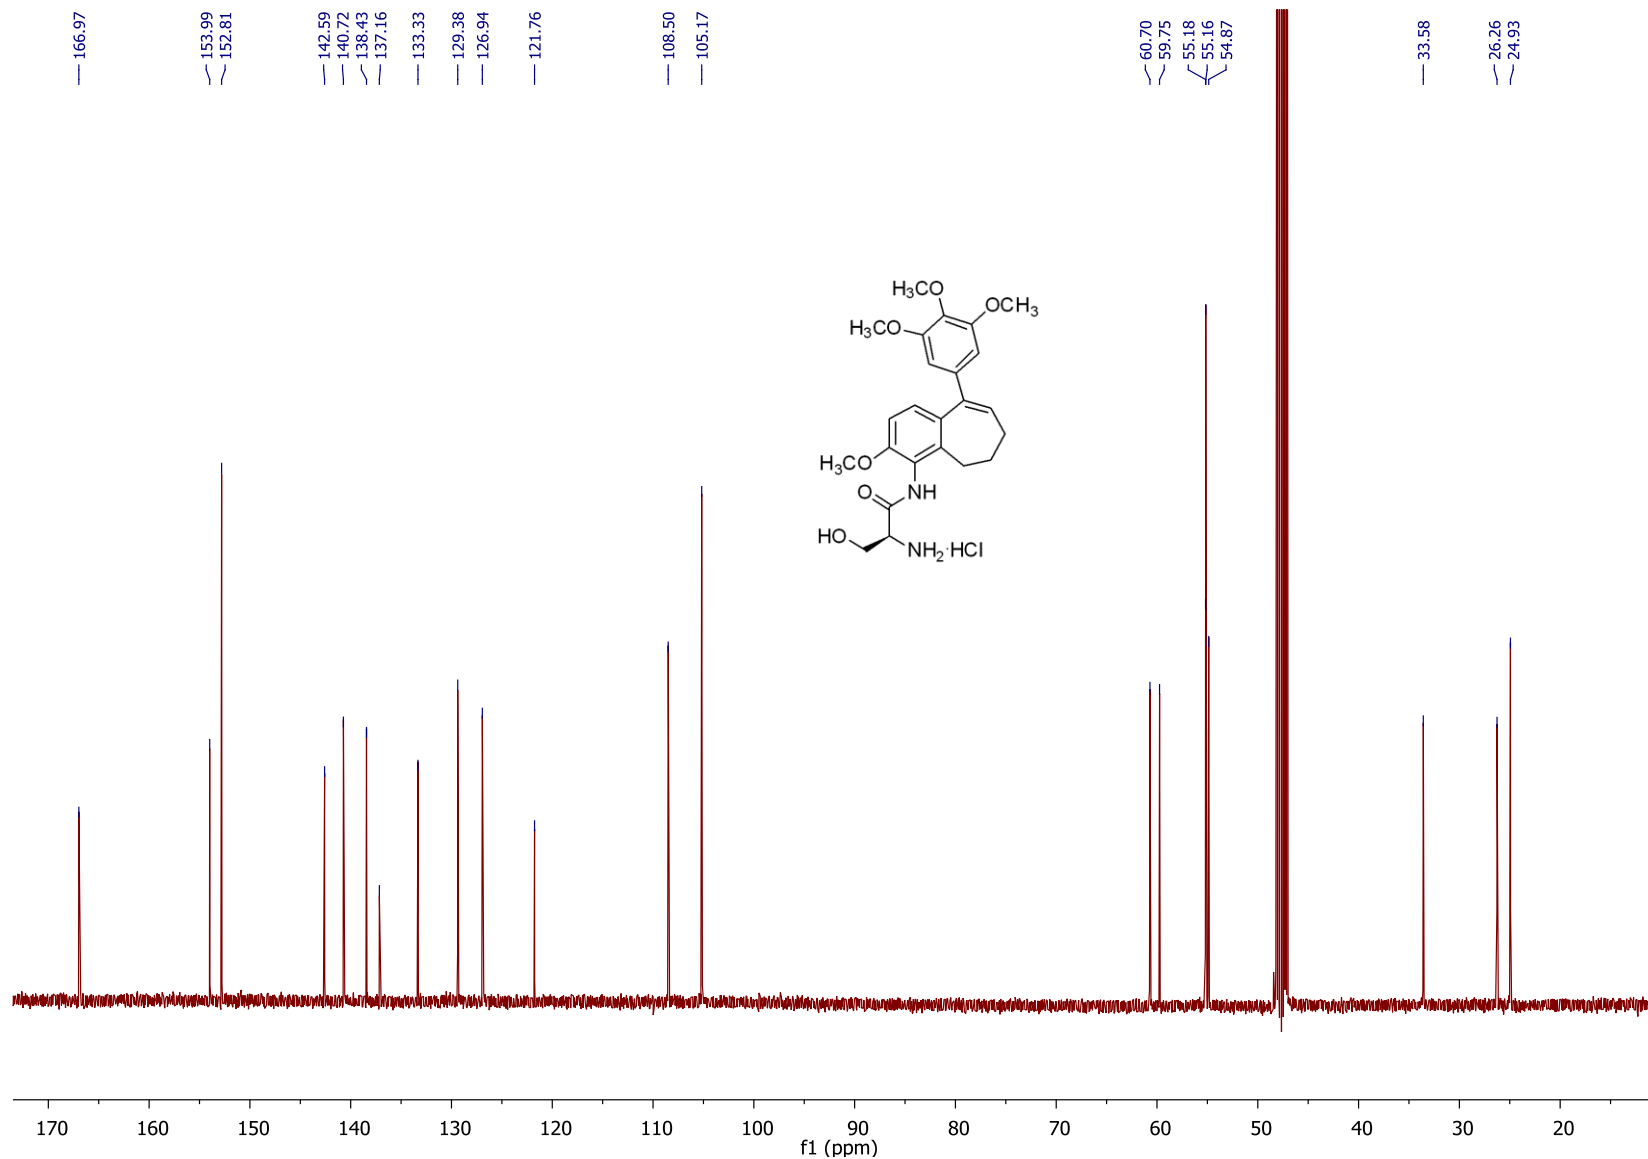

# HRMS Compound 39

CML\_IL\_017\_MS^3\_raw\_ORBL+ESI

8/26/2012 11:33:23 PM

CML\_IL\_017\_MS^3\_raw\_ORBL+ESI #58 RT: 0.86  
T: FTMS + p ESI Full ms2 443.22@cid0.00 [120.0]

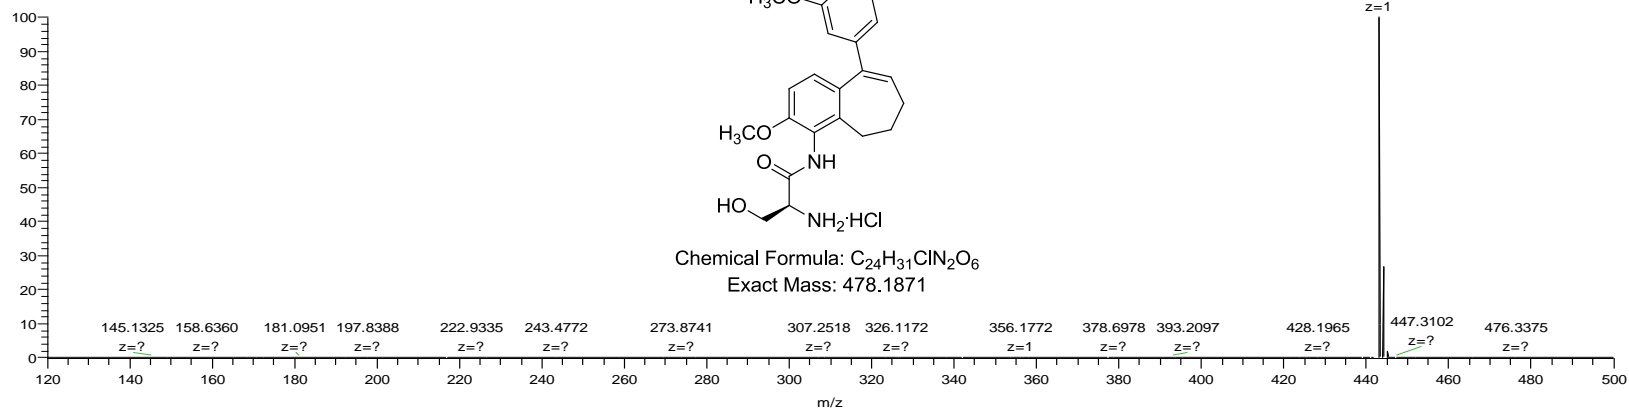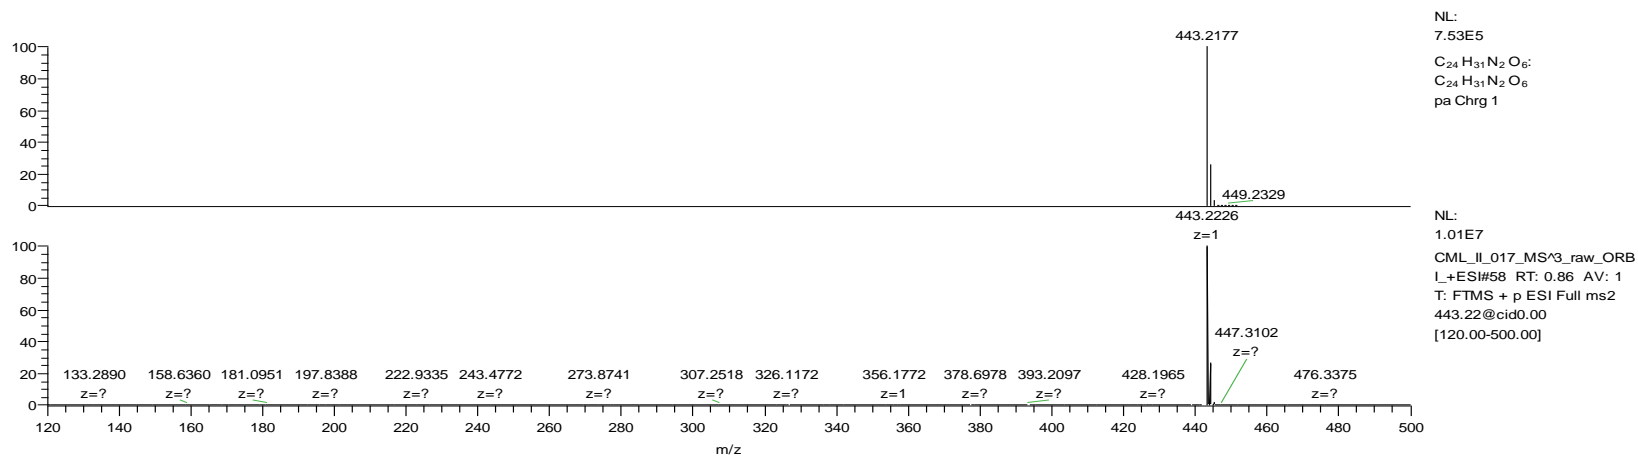

# HPLC for Compound 39

Data File C:\CHEM32\1\DATA\ERIC LIN\II\_017\_RUN10009.D

Sample Name: CML\_II\_017\_run1

```
=====
Acq. Operator   : ERIC LIN
Acq. Instrument : Instrument 1           Location : -
Injection Date  : 8/26/2012 8:14:29 PM
Acq. Method     : C:\CHEM32\1\METHODS\MASTERMETHOD.M
Last changed    : 8/26/2012 8:11:49 PM by ERIC LIN
                  (modified after loading)
Analysis Method : C:\CHEM32\1\DATA\ERIC LIN\II_017_RUN10009.D\DA.M (MASTERMETHOD.M)
Last changed    : 8/26/2012 9:04:41 PM by ERIC LIN
Sample Info     :
```

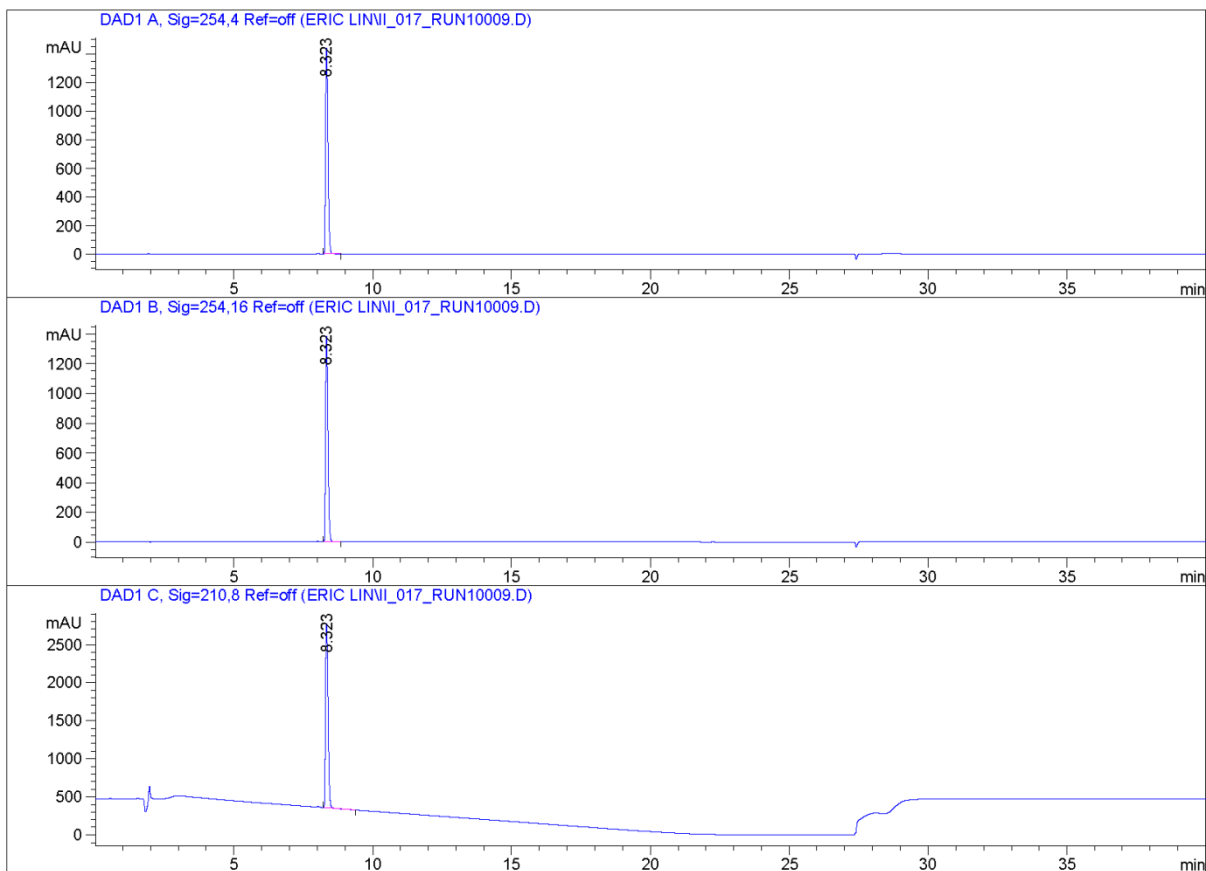

Data File C:\CHEM32\1\DATA\ERIC LIN\II\_017\_RUN10009.D  
Sample Name: CML\_II\_017\_run1

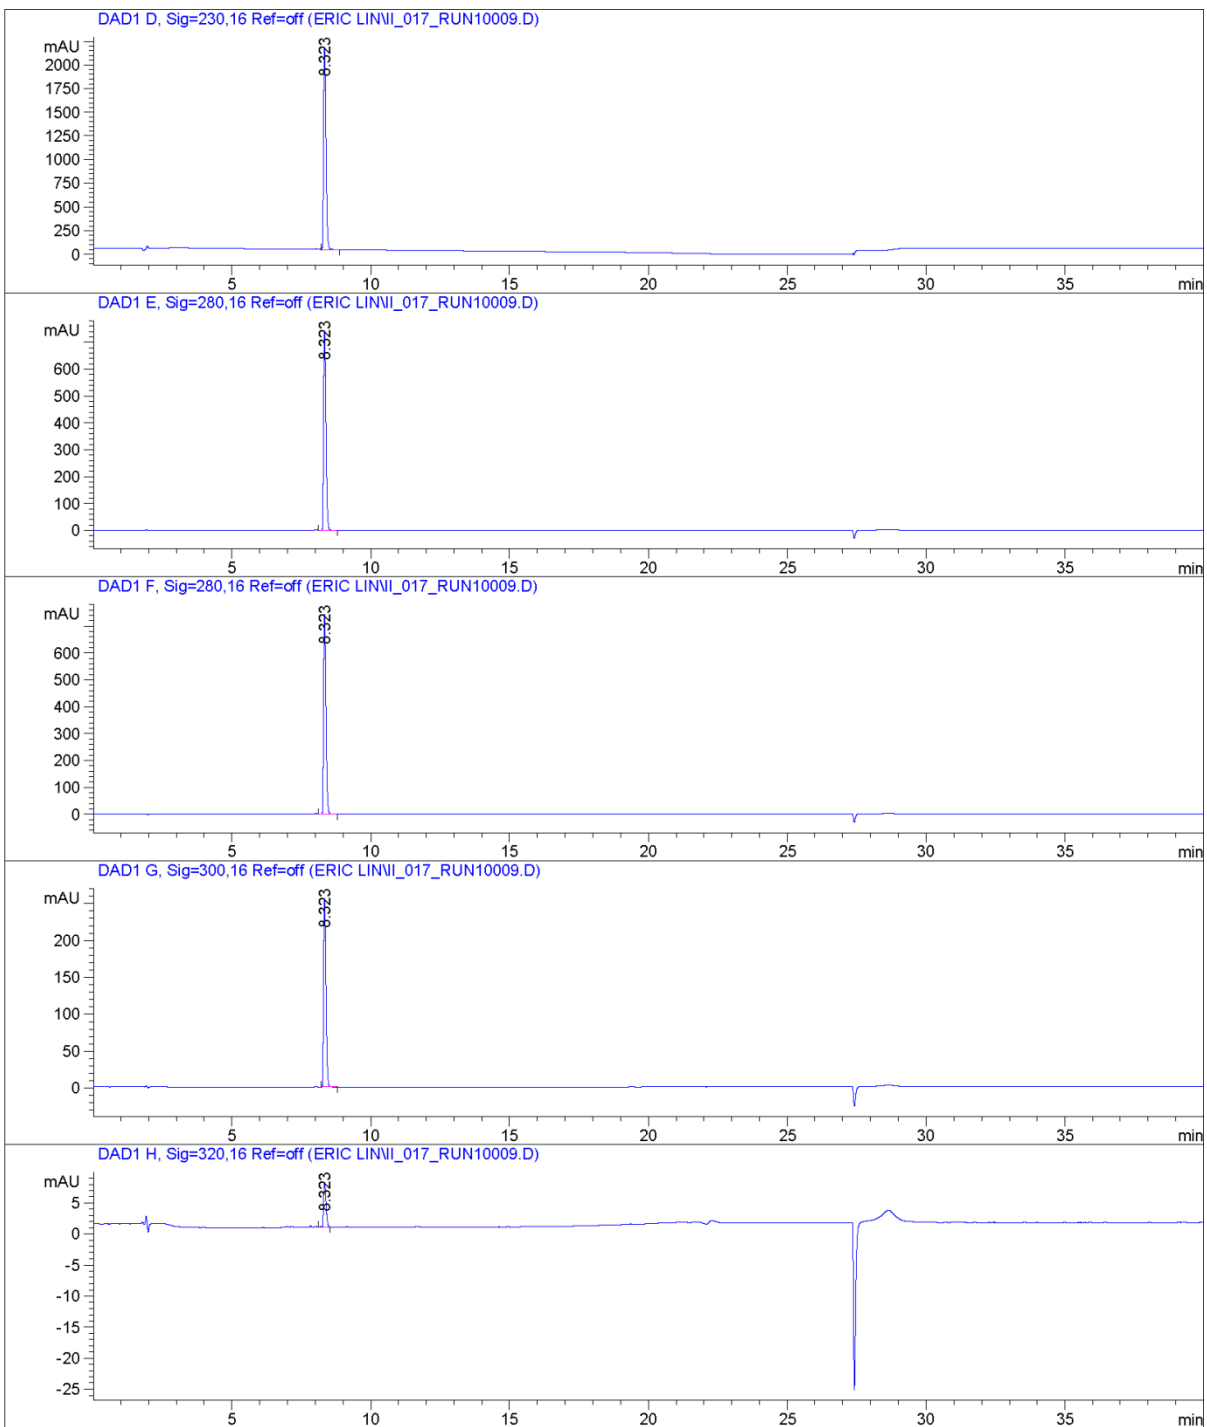

=====  
Area Percent Report  
=====

Sorted By : Signal  
Multiplier : 1.0000  
Dilution : 1.0000  
Use Multiplier & Dilution Factor with ISTDs

Signal 1: DAD1 A, Sig=254,4 Ref=off

| Peak # | RetTime [min] | Type | Width [min] | Area [mAU*s] | Height [mAU] | Area %   |
|--------|---------------|------|-------------|--------------|--------------|----------|
| 1      | 8.323         | VV   | 0.0949      | 8745.86328   | 1439.63110   | 100.0000 |

Totals : 8745.86328 1439.63110

Signal 2: DAD1 B, Sig=254,16 Ref=off

| Peak # | RetTime [min] | Type | Width [min] | Area [mAU*s] | Height [mAU] | Area %   |
|--------|---------------|------|-------------|--------------|--------------|----------|
| 1      | 8.323         | VB   | 0.0948      | 8403.83496   | 1384.48010   | 100.0000 |

Totals : 8403.83496 1384.48010

Signal 3: DAD1 C, Sig=210,8 Ref=off

| Peak # | RetTime [min] | Type | Width [min] | Area [mAU*s] | Height [mAU] | Area %   |
|--------|---------------|------|-------------|--------------|--------------|----------|
| 1      | 8.323         | VB   | 0.1035      | 1.56445e4    | 2416.47046   | 100.0000 |

Totals : 1.56445e4 2416.47046

Signal 4: DAD1 D, Sig=230,16 Ref=off

| Peak # | RetTime [min] | Type | Width [min] | Area [mAU*s] | Height [mAU] | Area %   |
|--------|---------------|------|-------------|--------------|--------------|----------|
| 1      | 8.323         | VV   | 0.0977      | 1.31259e4    | 2134.97778   | 100.0000 |

Totals : 1.31259e4 2134.97778

Data File C:\CHEM32\1\DATA\ERIC LIN\II\_017\_RUN10009.D  
Sample Name: CML\_II\_017\_run1

Signal 5: DAD1 E, Sig=280,16 Ref=off

| Peak #   | RetTime [min] | Type | Width [min] | Area [mAU*s] | Height [mAU] | Area %   |
|----------|---------------|------|-------------|--------------|--------------|----------|
| 1        | 8.323         | VB   | 0.0948      | 4502.56006   | 741.66730    | 100.0000 |
| Totals : |               |      |             | 4502.56006   | 741.66730    |          |

Signal 6: DAD1 F, Sig=280,16 Ref=off

| Peak #   | RetTime [min] | Type | Width [min] | Area [mAU*s] | Height [mAU] | Area %   |
|----------|---------------|------|-------------|--------------|--------------|----------|
| 1        | 8.323         | VB   | 0.0948      | 4502.56006   | 741.66730    | 100.0000 |
| Totals : |               |      |             | 4502.56006   | 741.66730    |          |

Signal 7: DAD1 G, Sig=300,16 Ref=off

| Peak #   | RetTime [min] | Type | Width [min] | Area [mAU*s] | Height [mAU] | Area %   |
|----------|---------------|------|-------------|--------------|--------------|----------|
| 1        | 8.323         | BB   | 0.0949      | 1553.26367   | 255.71465    | 100.0000 |
| Totals : |               |      |             | 1553.26367   | 255.71465    |          |

Signal 8: DAD1 H, Sig=320,16 Ref=off

| Peak #   | RetTime [min] | Type | Width [min] | Area [mAU*s] | Height [mAU] | Area %   |
|----------|---------------|------|-------------|--------------|--------------|----------|
| 1        | 8.323         | BB   | 0.0998      | 45.32738     | 7.16882      | 100.0000 |
| Totals : |               |      |             | 45.32738     | 7.16882      |          |

=====  
\*\*\* End of Report \*\*\*

<sup>1</sup>H NMR (CDCl<sub>3</sub>, 500 MHz) Compound 40

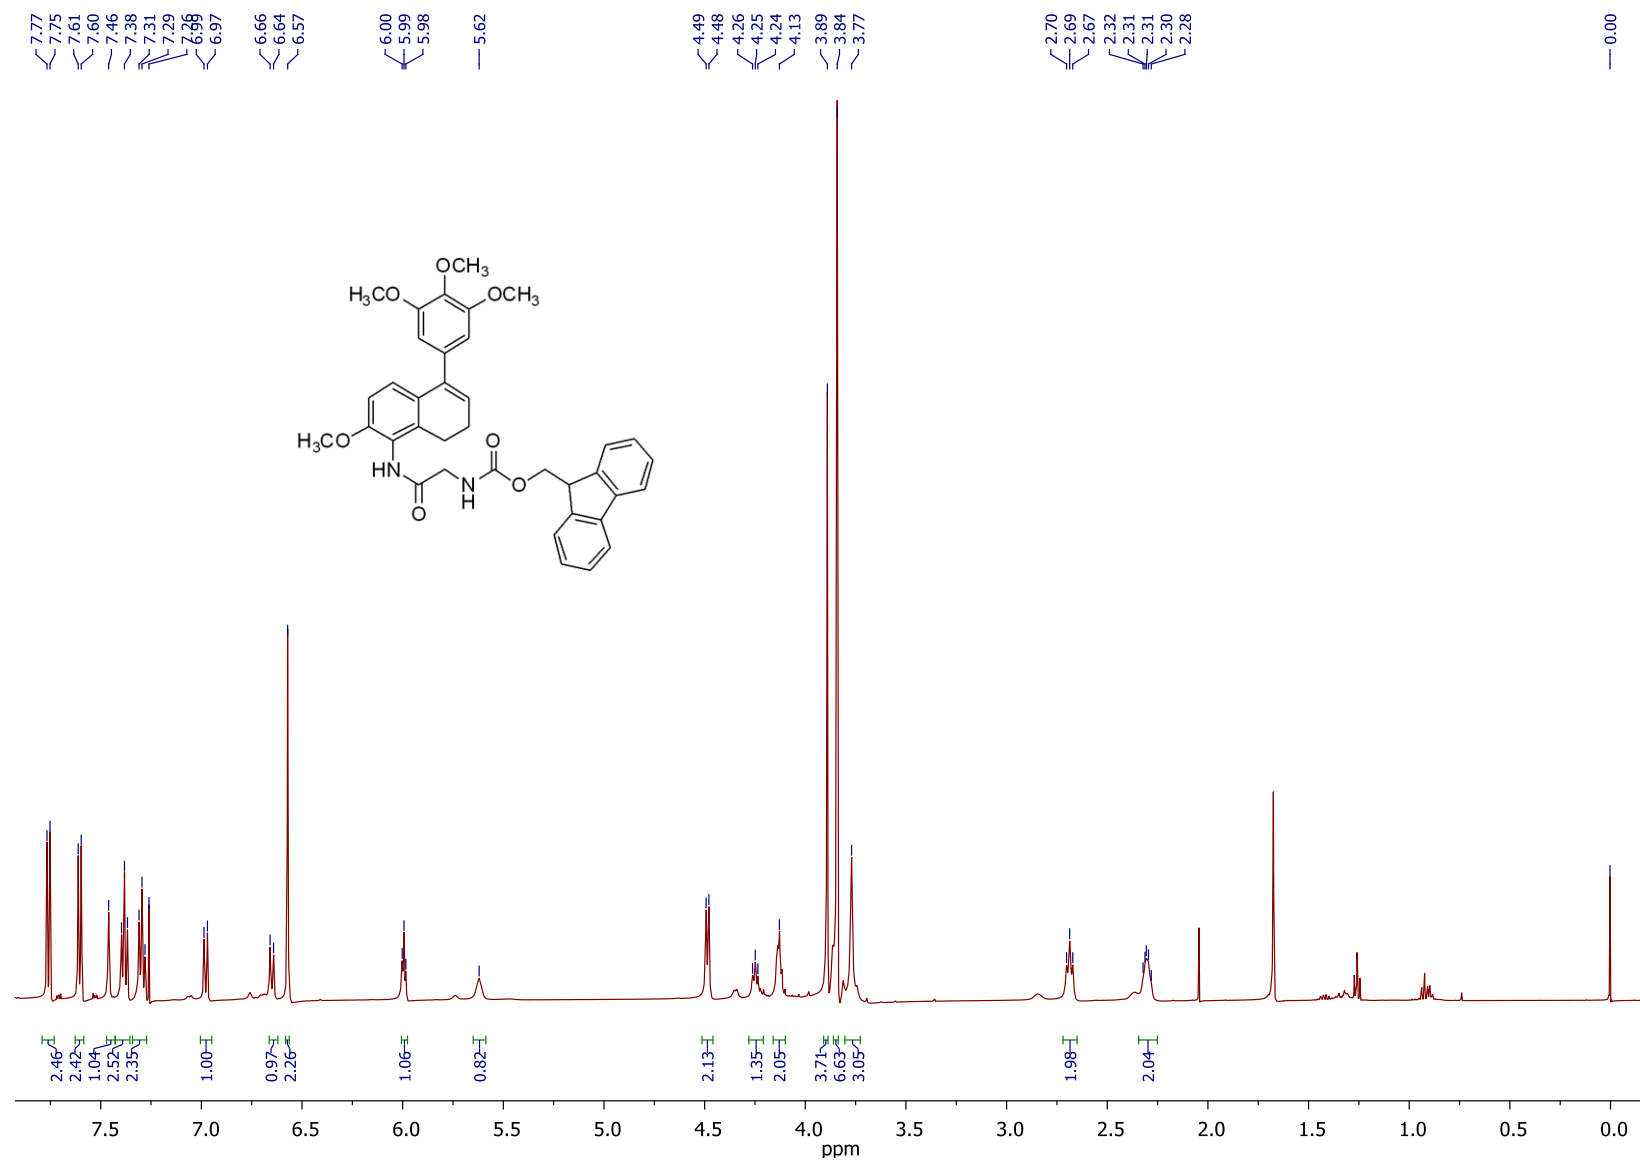

S192



$^{13}\text{C}$  NMR ( $\text{CDCl}_3$ , 125 MHz) Compound **40**

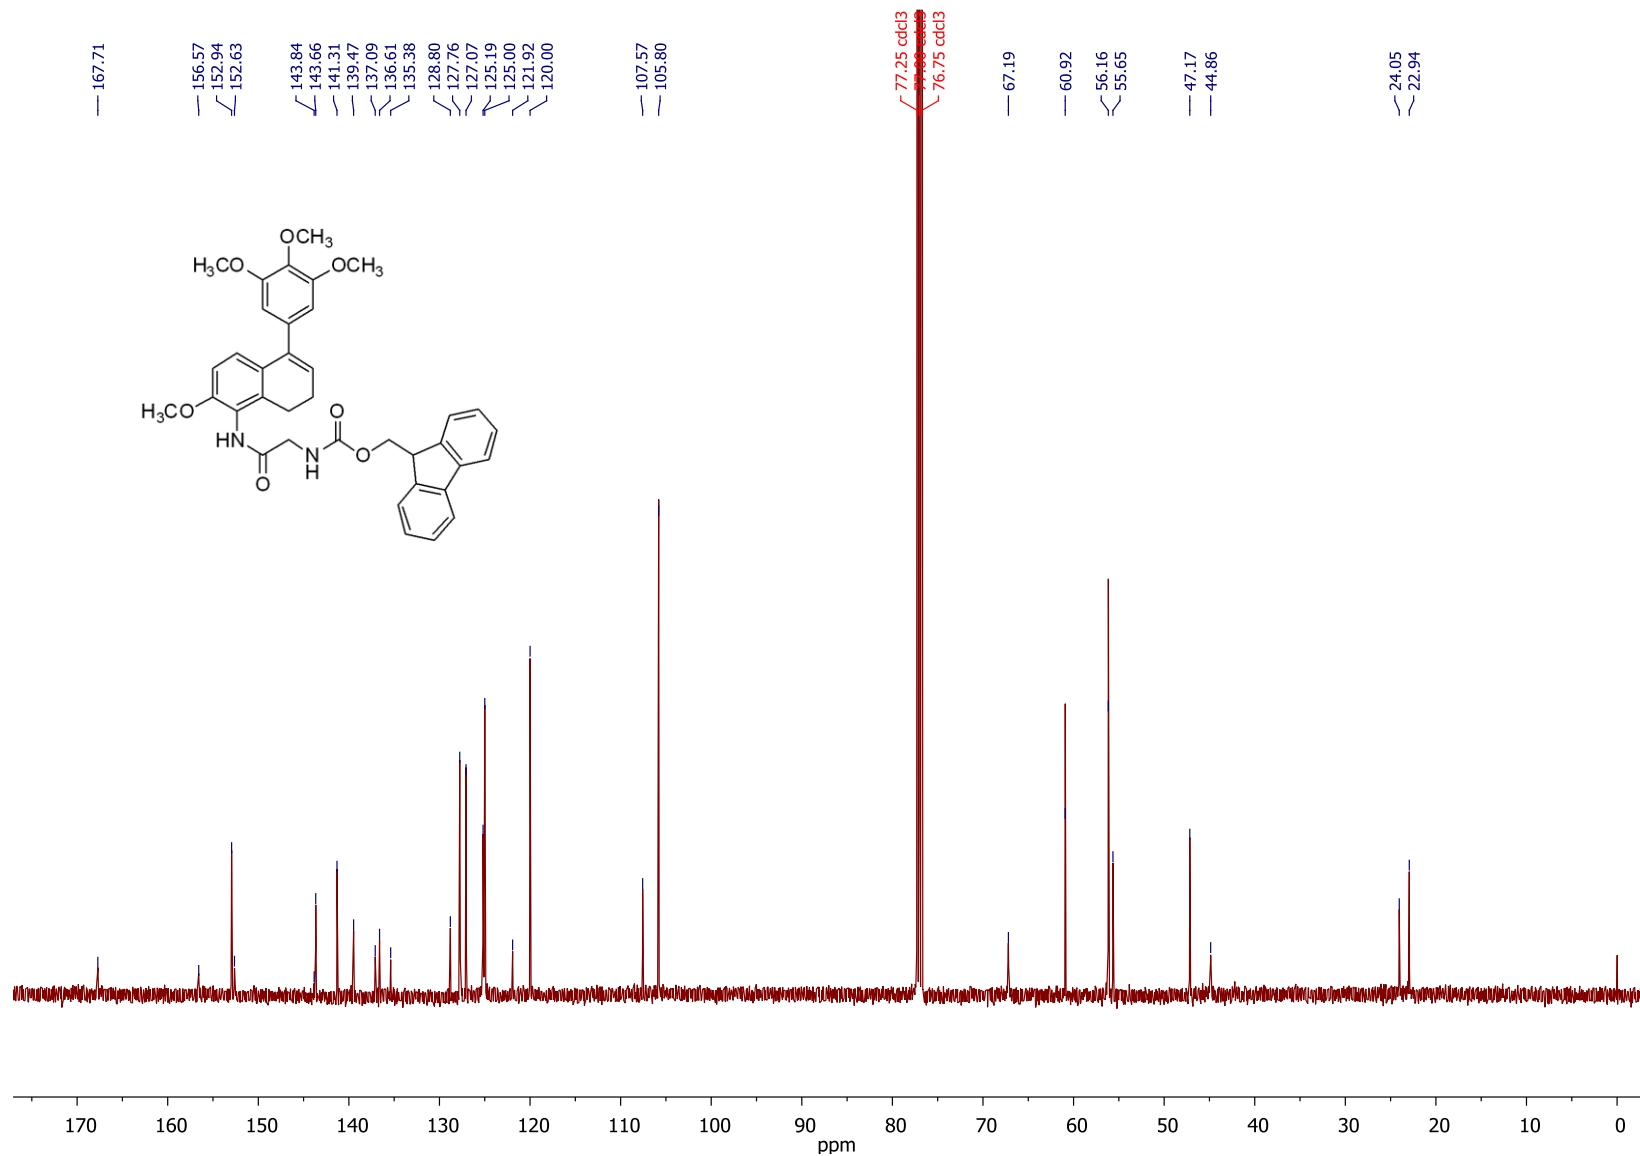

S193

<sup>1</sup>H NMR (CDCl<sub>3</sub>, 500 MHz) Compound 41

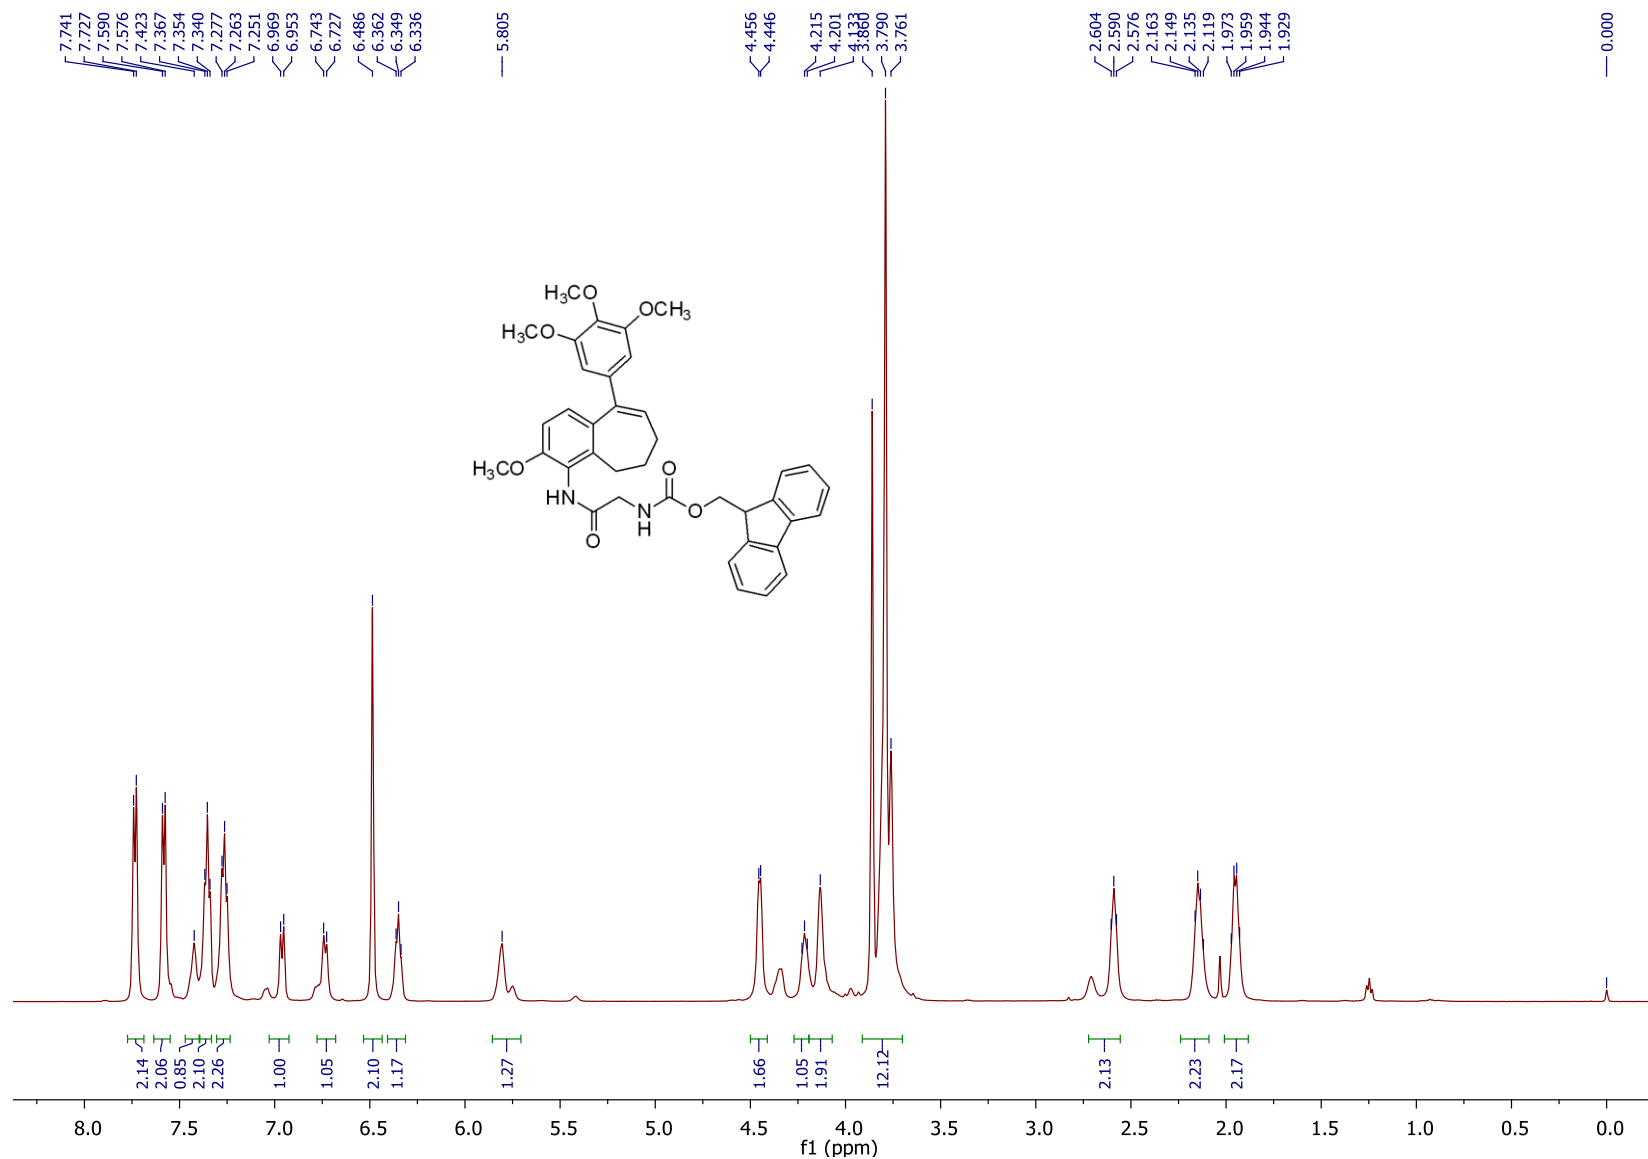

$^{13}\text{C}$  NMR ( $\text{CDCl}_3$ , 125 MHz) Compound **41**

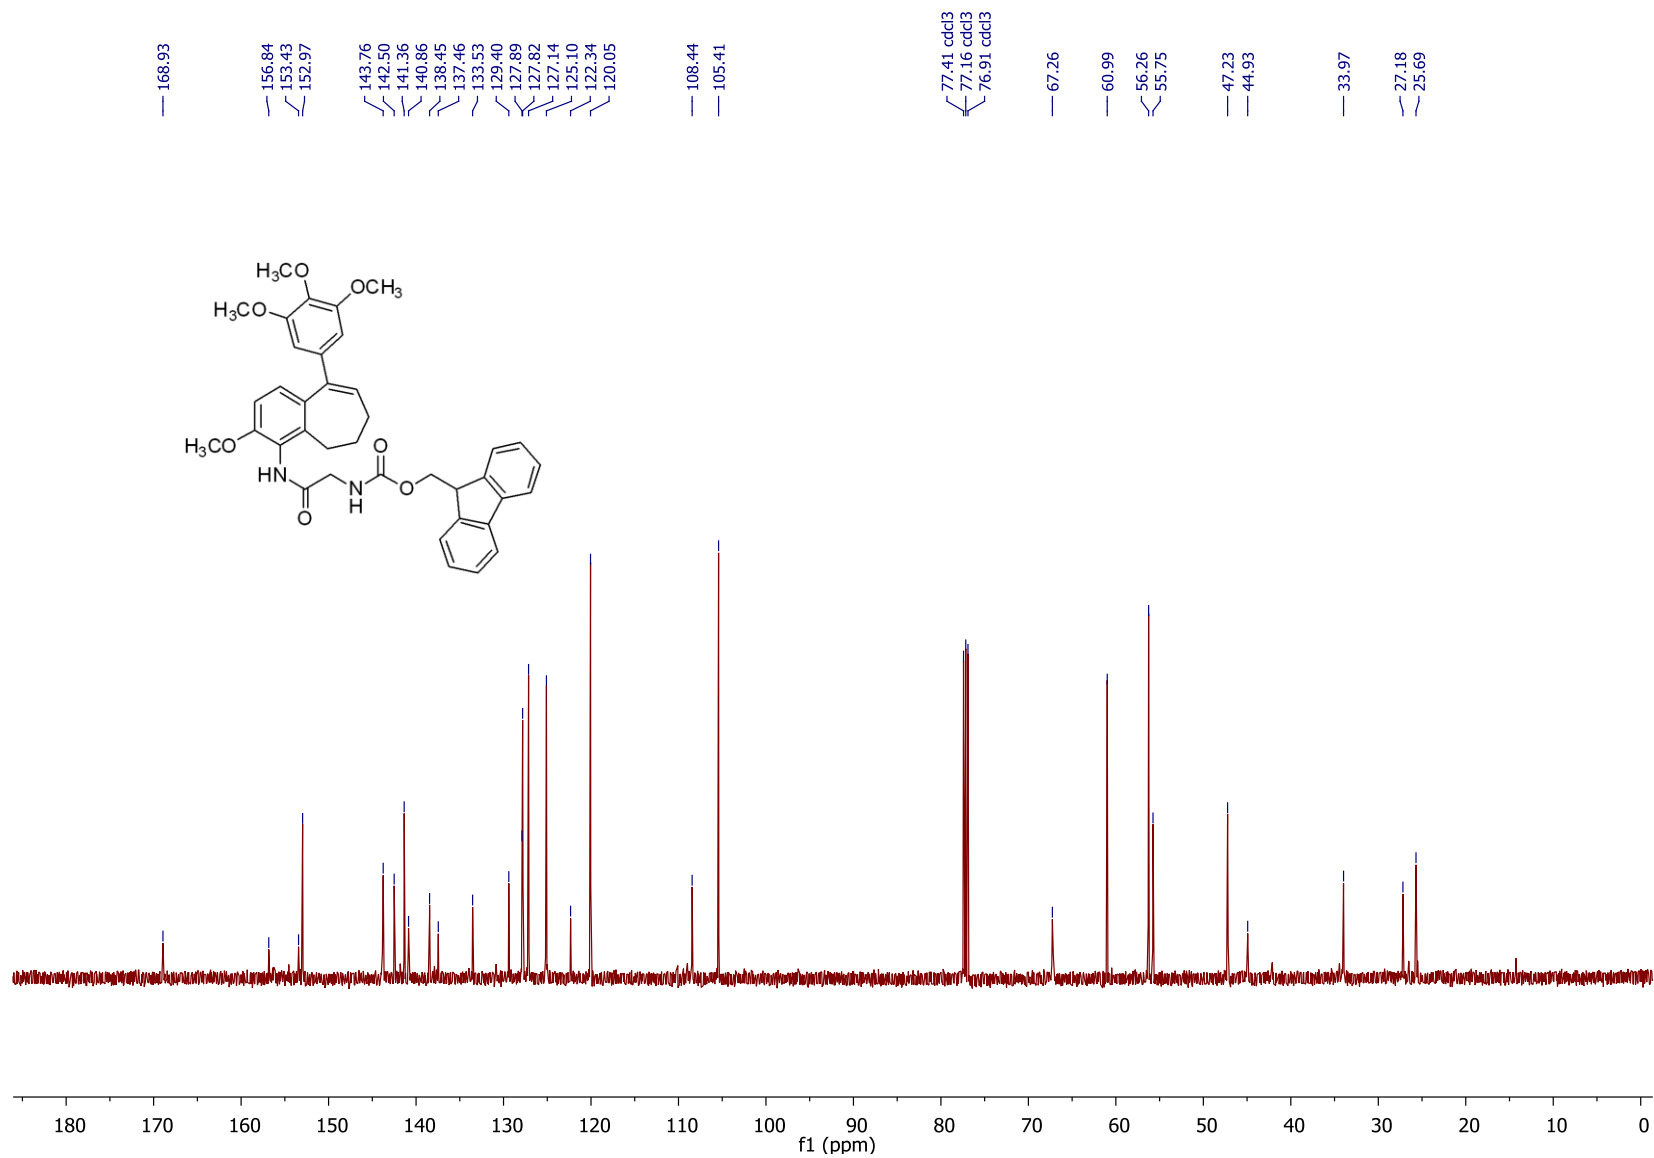

S195

<sup>1</sup>H NMR (CDCl<sub>3</sub>, 500 MHz) Compound 42

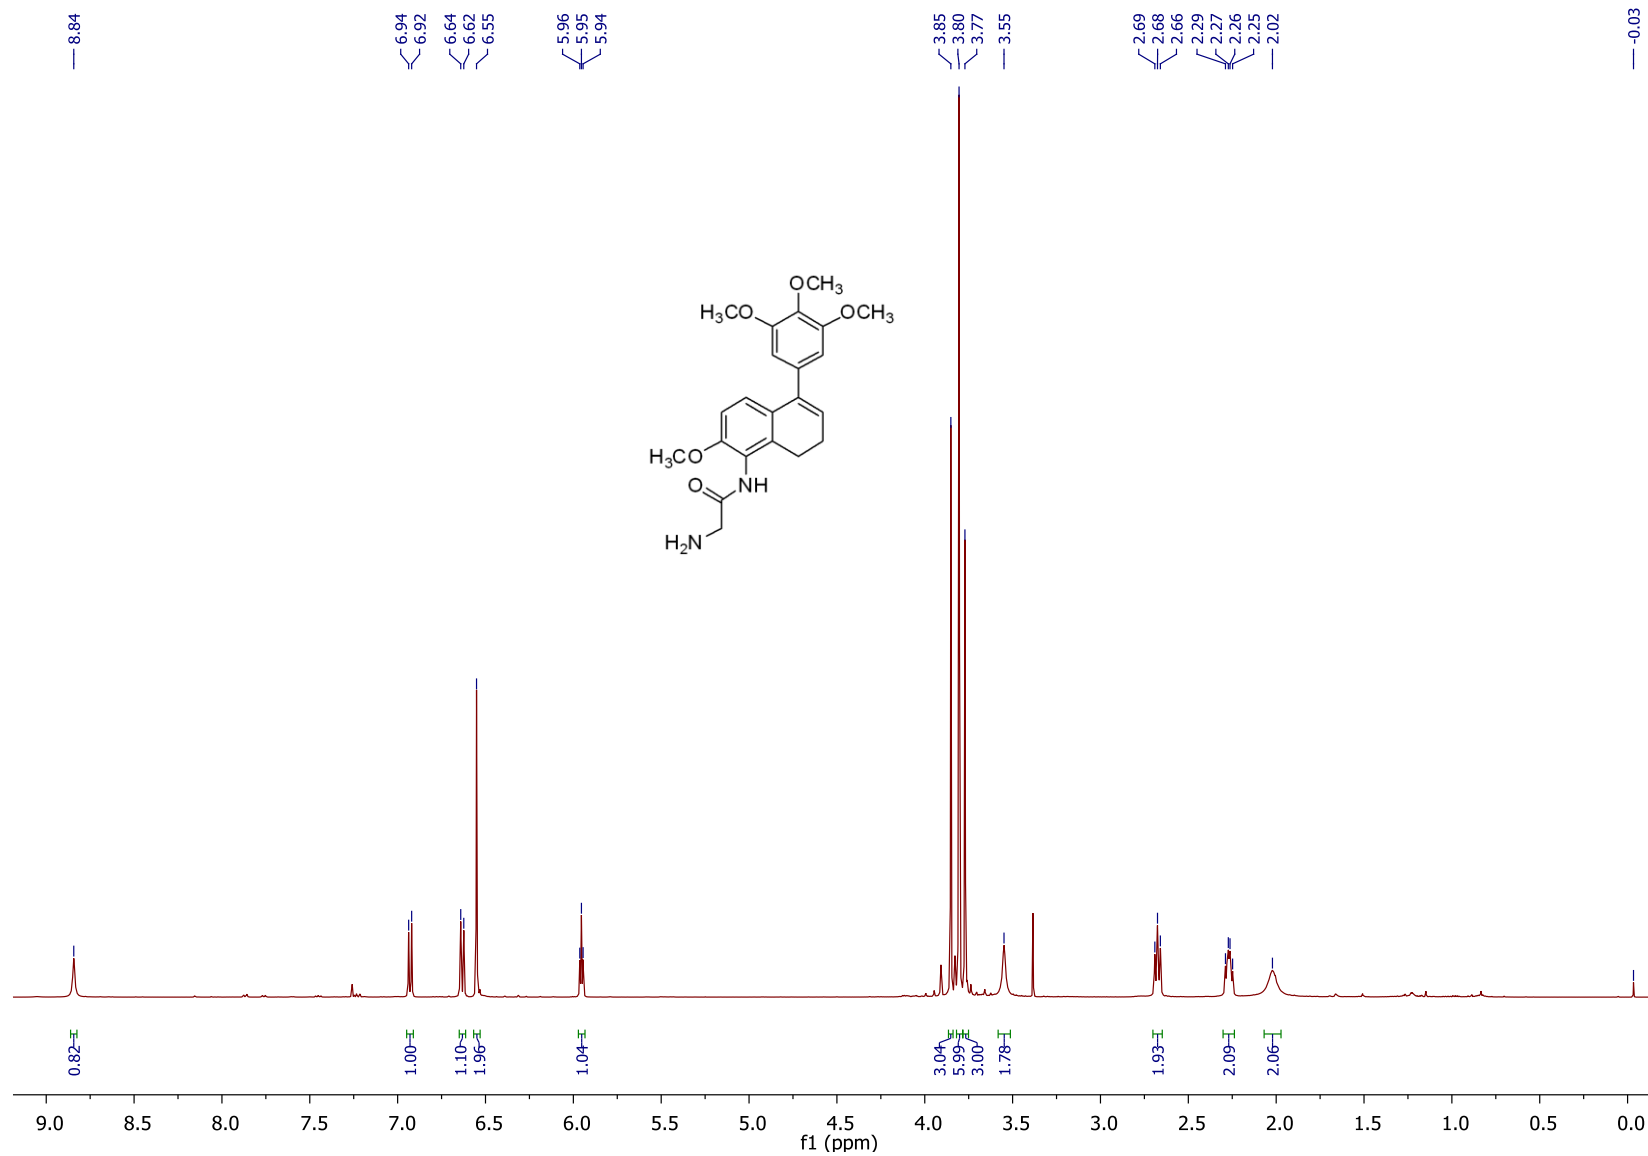

S196

<sup>13</sup>C NMR (CDCl<sub>3</sub>, 125 MHz) Compound **42**

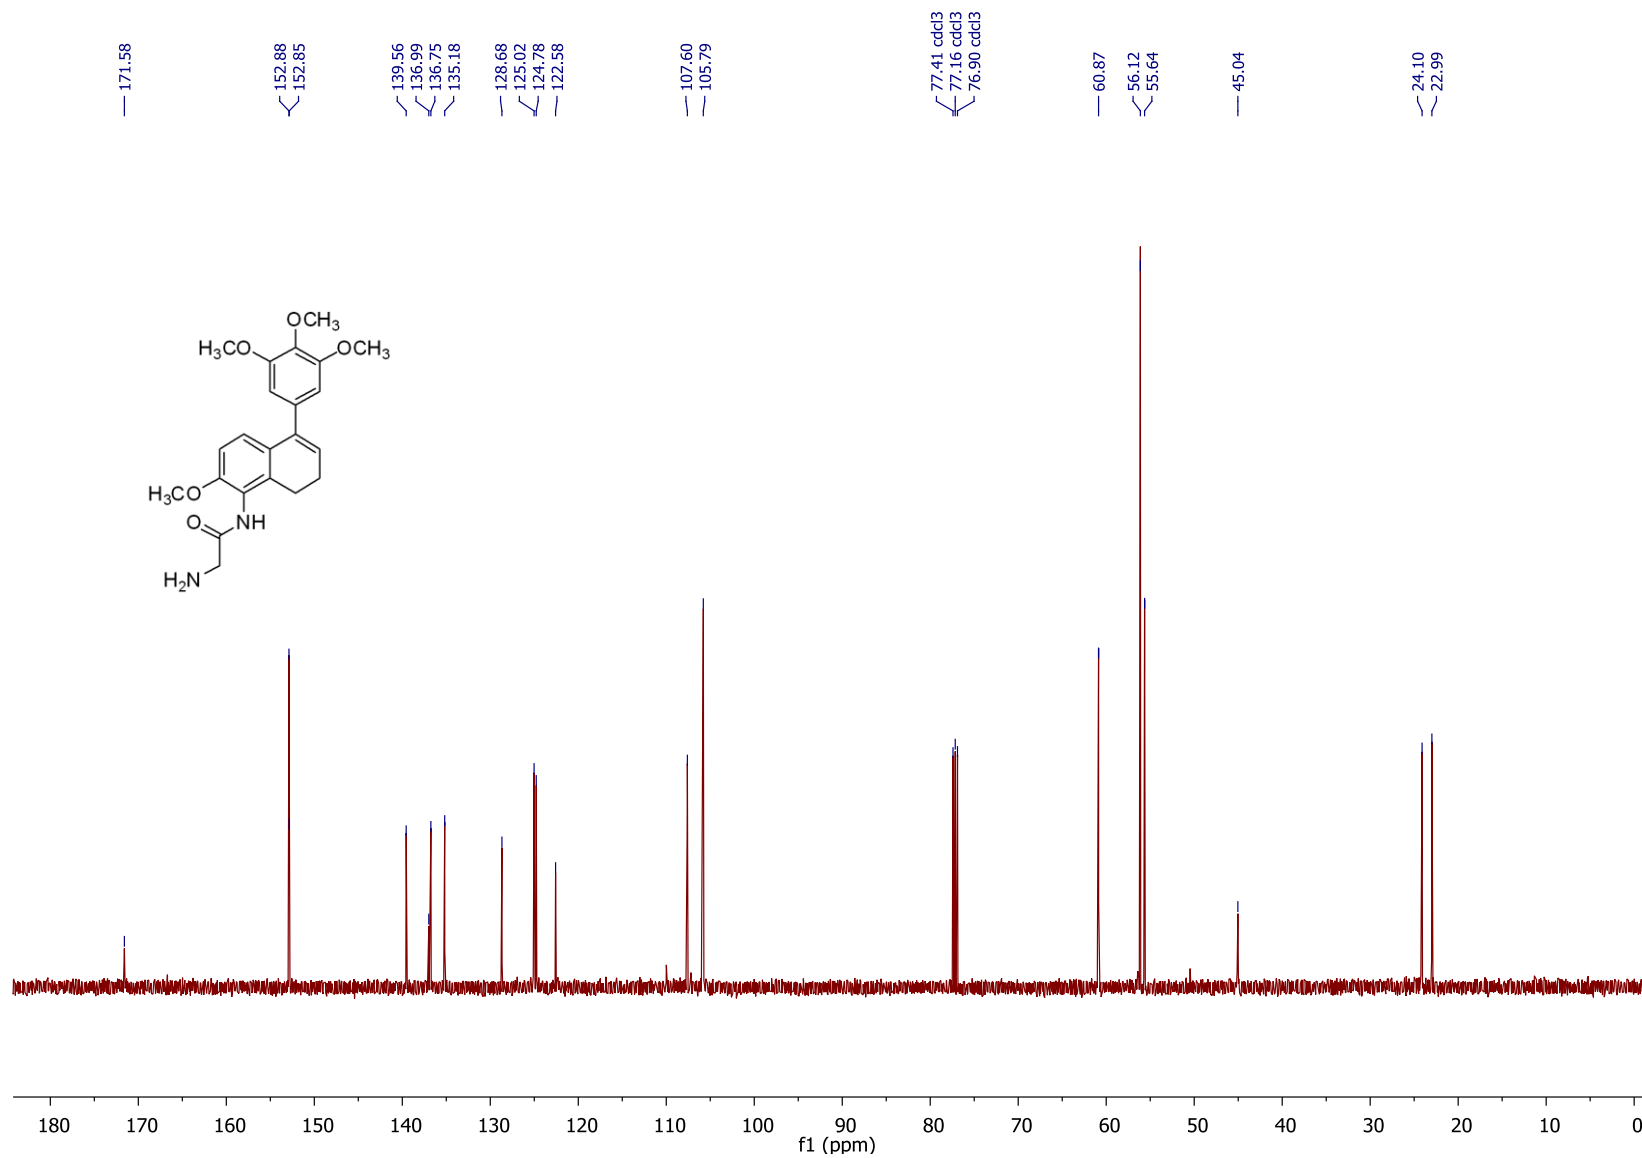

# HRMS Compound 42

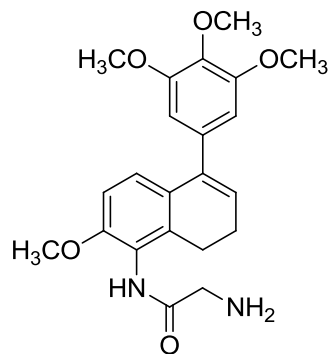

Chemical Formula:  $C_{22}H_{26}N_2O_5$   
Exact Mass: 398.1842

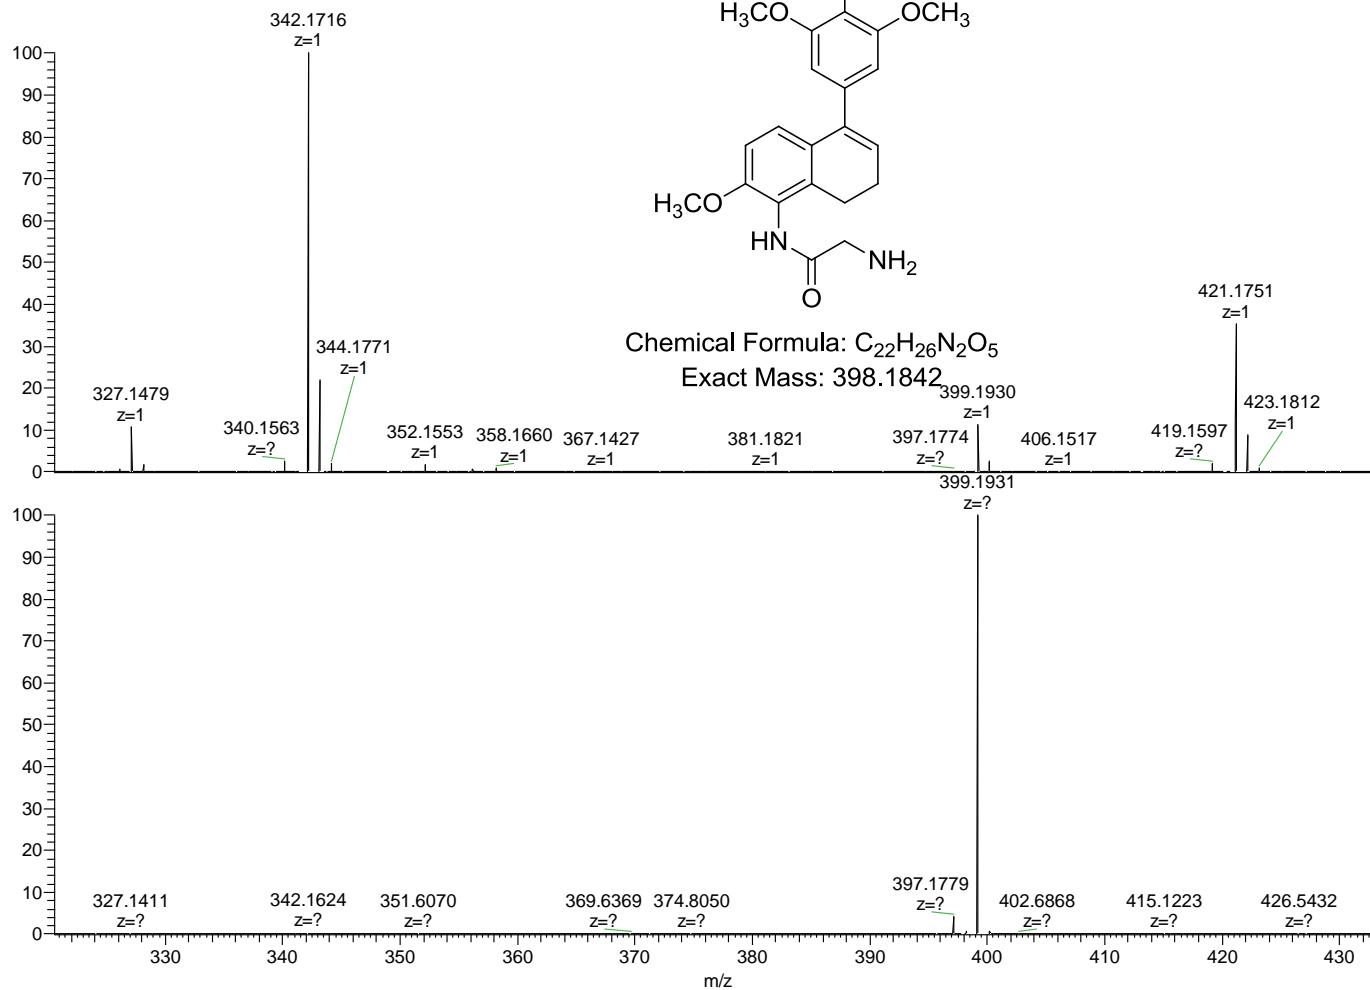

NL: 3.79E7  
cm1\_1\_151\_ms^3\_raw\_orbi\_+esi\_+esi#34 RT: 0.36 AV: 1 T: FTMS + p ESI Full ms [105.00-500.00]

NL: 5.18E6  
cm1\_1\_151\_ms^2\_raw\_orbi\_+esi\_+esi#22 RT: 0.36 AV: 1 T: FTMS + p ESI Full ms2 398.18@cid0.00 [105.00-500.00]

# HPLC for Compound 42

Data File C:\CHEM32\1\DATA\ERIC LIN\1\_151\_RUN200019.D  
Sample Name: CML\_1\_151\_run2

=====  
Acq. Operator : ERIC LIN  
Acq. Instrument : Instrument 1 Location : -  
Injection Date : 8/6/2012 3:44:48 PM  
Acq. Method : C:\CHEM32\1\METHODS\MASTERMETHOD.M  
Last changed : 8/6/2012 3:41:45 PM by ERIC LIN  
(modified after loading)  
Analysis Method : C:\CHEM32\1\METHODS\MASTERMETHOD.M  
Last changed : 8/6/2012 1:00:08 PM by ERIC LIN  
(modified after loading)

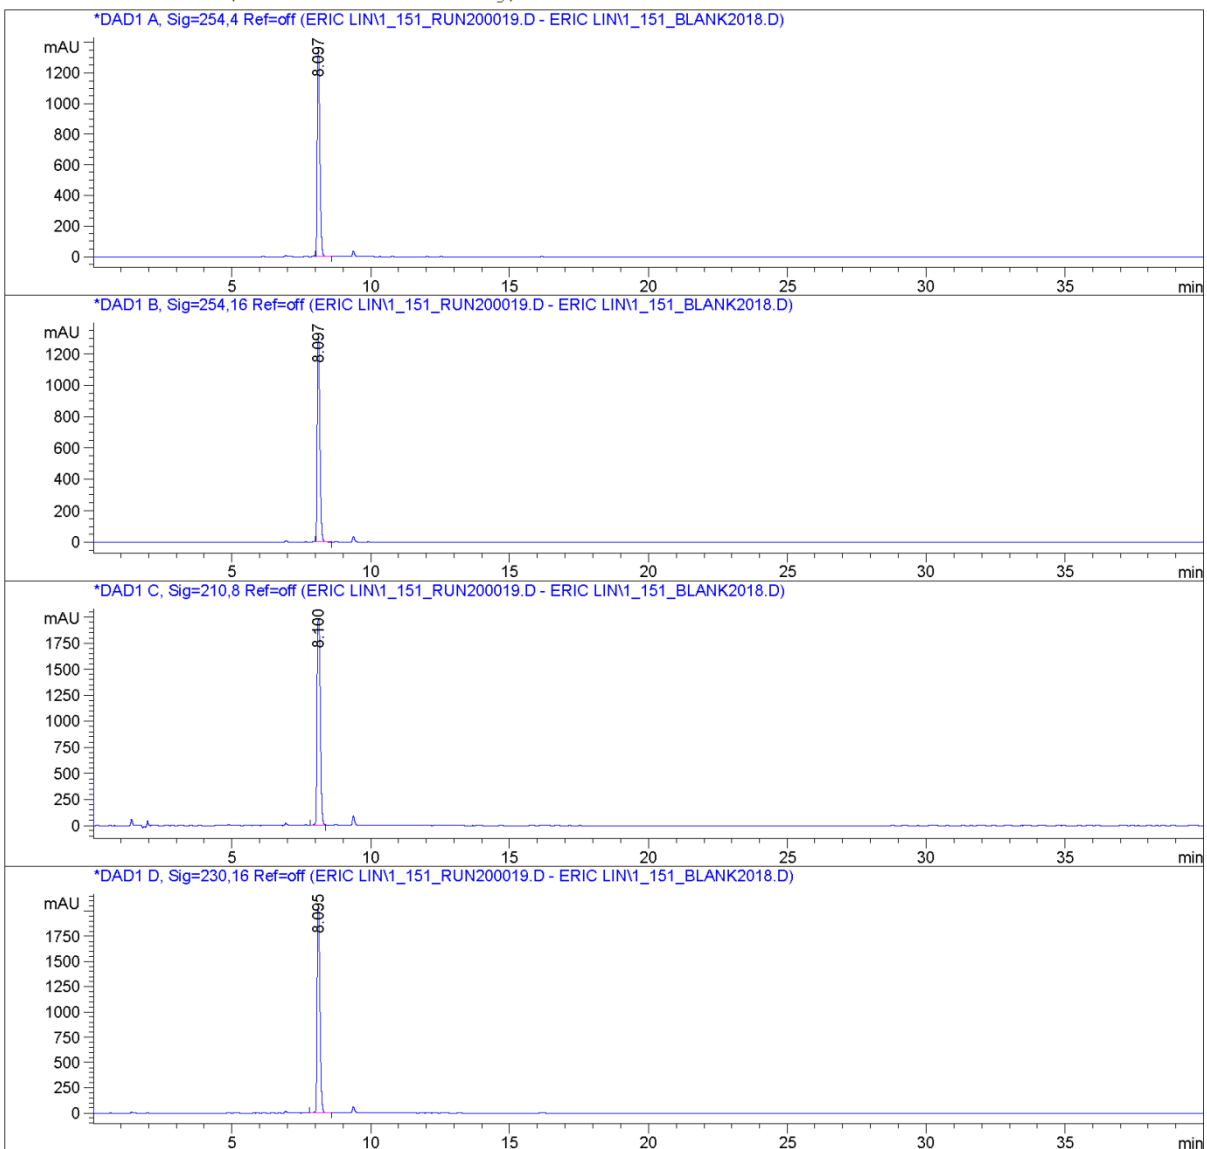

Data File C:\CHEM32\1\DATA\ERIC LIN\1\_151\_RUN200019.D

Sample Name: CML\_1\_151\_run2

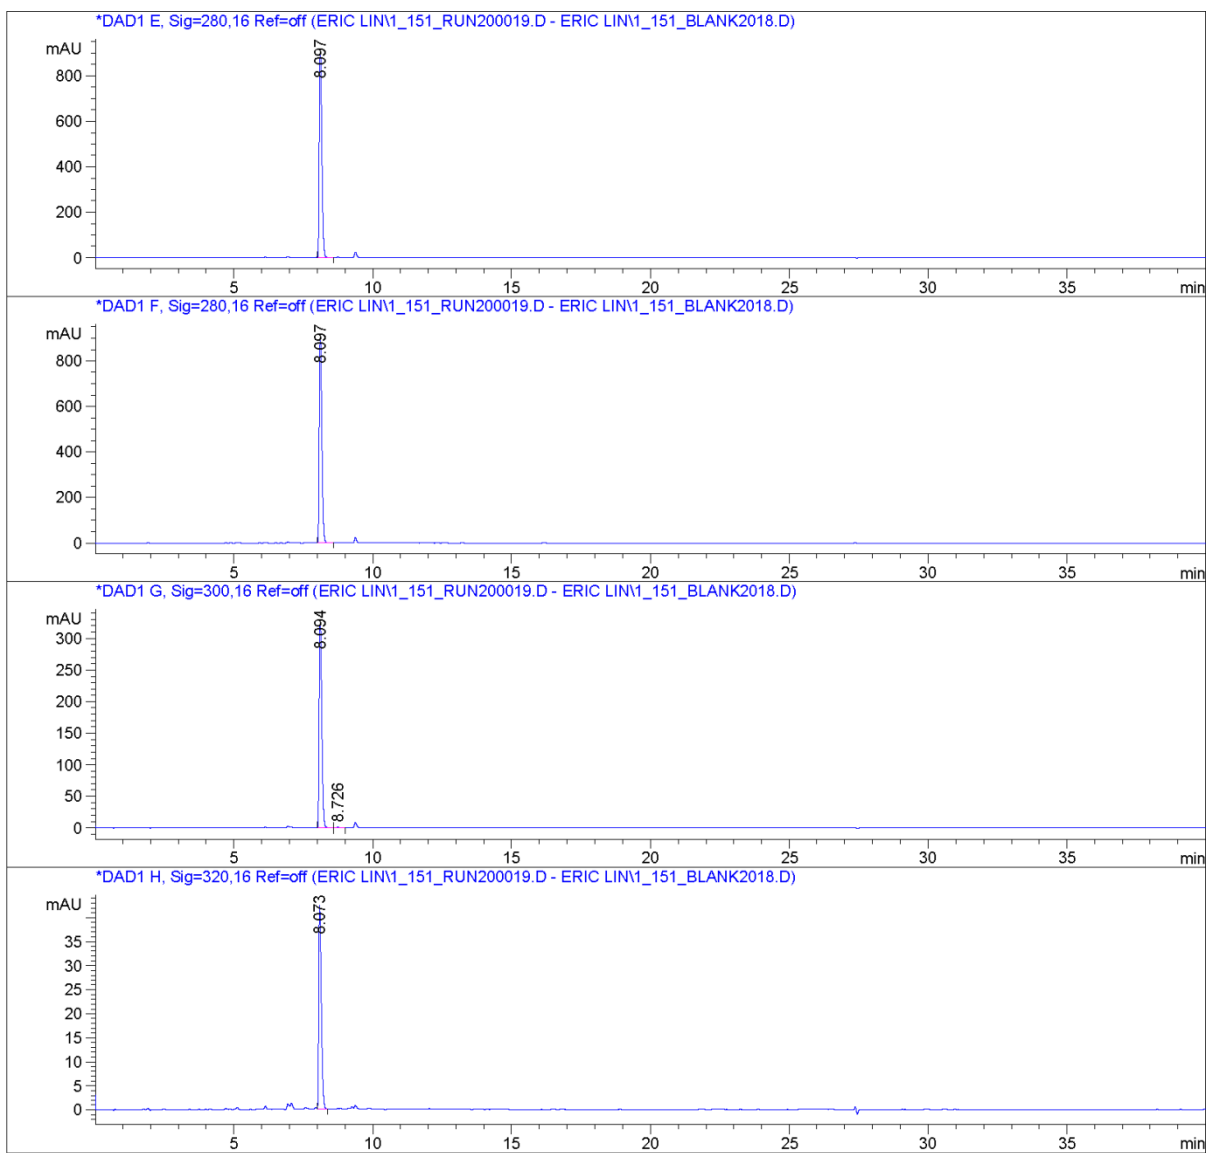

=====  
Area Percent Report  
=====

Sorted By : Signal  
Multiplier : 1.0000  
Dilution : 1.0000  
Use Multiplier & Dilution Factor with ISTDs



Data File C:\CHEM32\1\DATA\ERIC LIN\1\_151\_RUN200019.D  
Sample Name: CML\_1\_151\_run2

Signal 1: DAD1 A, Sig=254,4 Ref=off  
Signal has been modified after loading from rawdata file!

| Peak #   | RetTime [min] | Type | Width [min] | Area [mAU*s] | Height [mAU] | Area %   |
|----------|---------------|------|-------------|--------------|--------------|----------|
| 1        | 8.097         | VB   | 0.1019      | 8863.30371   | 1363.22180   | 100.0000 |
| Totals : |               |      |             | 8863.30371   | 1363.22180   |          |

Signal 2: DAD1 B, Sig=254,16 Ref=off  
Signal has been modified after loading from rawdata file!

| Peak #   | RetTime [min] | Type | Width [min] | Area [mAU*s] | Height [mAU] | Area %   |
|----------|---------------|------|-------------|--------------|--------------|----------|
| 1        | 8.097         | VB   | 0.1039      | 8660.84570   | 1330.41003   | 100.0000 |
| Totals : |               |      |             | 8660.84570   | 1330.41003   |          |

Signal 3: DAD1 C, Sig=210,8 Ref=off  
Signal has been modified after loading from rawdata file!

| Peak #   | RetTime [min] | Type | Width [min] | Area [mAU*s] | Height [mAU] | Area %   |
|----------|---------------|------|-------------|--------------|--------------|----------|
| 1        | 8.100         | BV   | 0.1328      | 1.61150e4    | 1982.65149   | 100.0000 |
| Totals : |               |      |             | 1.61150e4    | 1982.65149   |          |

Signal 4: DAD1 D, Sig=230,16 Ref=off  
Signal has been modified after loading from rawdata file!

| Peak #   | RetTime [min] | Type | Width [min] | Area [mAU*s] | Height [mAU] | Area %   |
|----------|---------------|------|-------------|--------------|--------------|----------|
| 1        | 8.095         | BV   | 0.1118      | 1.44809e4    | 2065.76636   | 100.0000 |
| Totals : |               |      |             | 1.44809e4    | 2065.76636   |          |

Data File C:\CHEM32\1\DATA\ERIC LIN\1\_151\_RUN200019.D  
Sample Name: CML\_1\_151\_run2

Signal 5: DAD1 E, Sig=280,16 Ref=off  
Signal has been modified after loading from rawdata file!

| Peak #   | RetTime [min] | Type | Width [min] | Area [mAU*s] | Height [mAU] | Area %   |
|----------|---------------|------|-------------|--------------|--------------|----------|
| 1        | 8.097         | VB   | 0.1017      | 5946.59521   | 916.38574    | 100.0000 |
| Totals : |               |      |             | 5946.59521   | 916.38574    |          |

Signal 6: DAD1 F, Sig=280,16 Ref=off  
Signal has been modified after loading from rawdata file!

| Peak #   | RetTime [min] | Type | Width [min] | Area [mAU*s] | Height [mAU] | Area %   |
|----------|---------------|------|-------------|--------------|--------------|----------|
| 1        | 8.097         | VB   | 0.1017      | 5946.59521   | 916.38574    | 100.0000 |
| Totals : |               |      |             | 5946.59521   | 916.38574    |          |

Signal 7: DAD1 G, Sig=300,16 Ref=off  
Signal has been modified after loading from rawdata file!

| Peak #   | RetTime [min] | Type | Width [min] | Area [mAU*s] | Height [mAU] | Area %  |
|----------|---------------|------|-------------|--------------|--------------|---------|
| 1        | 8.094         | VB   | 0.1049      | 2171.17407   | 329.57730    | 99.5934 |
| 2        | 8.726         | BB   | 0.1166      | 8.86310      | 1.02736      | 0.4066  |
| Totals : |               |      |             | 2180.03717   | 330.60466    |         |

Signal 8: DAD1 H, Sig=320,16 Ref=off  
Signal has been modified after loading from rawdata file!

| Peak #   | RetTime [min] | Type | Width [min] | Area [mAU*s] | Height [mAU] | Area %   |
|----------|---------------|------|-------------|--------------|--------------|----------|
| 1        | 8.073         | VB   | 0.1002      | 270.49811    | 42.54499     | 100.0000 |
| Totals : |               |      |             | 270.49811    | 42.54499     |          |

=====  
\*\*\* End of Report \*\*\*

<sup>1</sup>H NMR (CD<sub>3</sub>OD, 500 MHz) Compound **43**

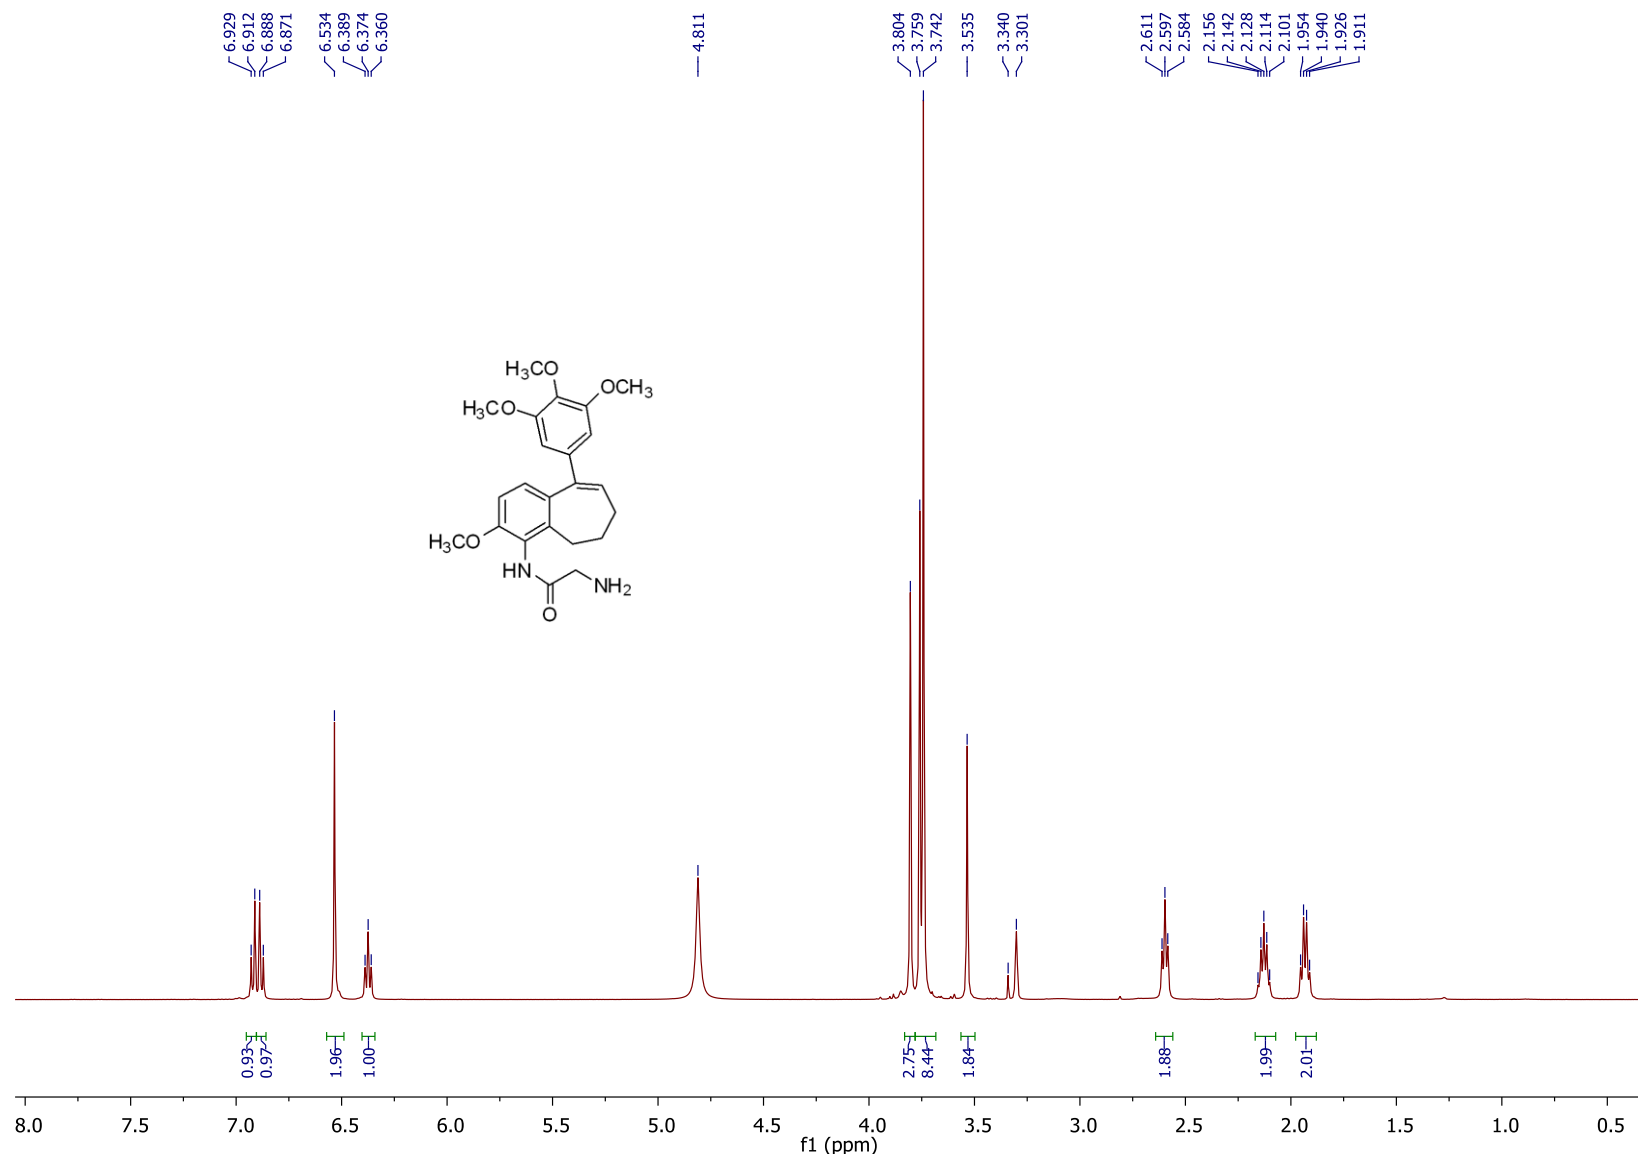

S203

<sup>13</sup>C NMR (CD<sub>3</sub>OD, 125 MHz) Compound **43**

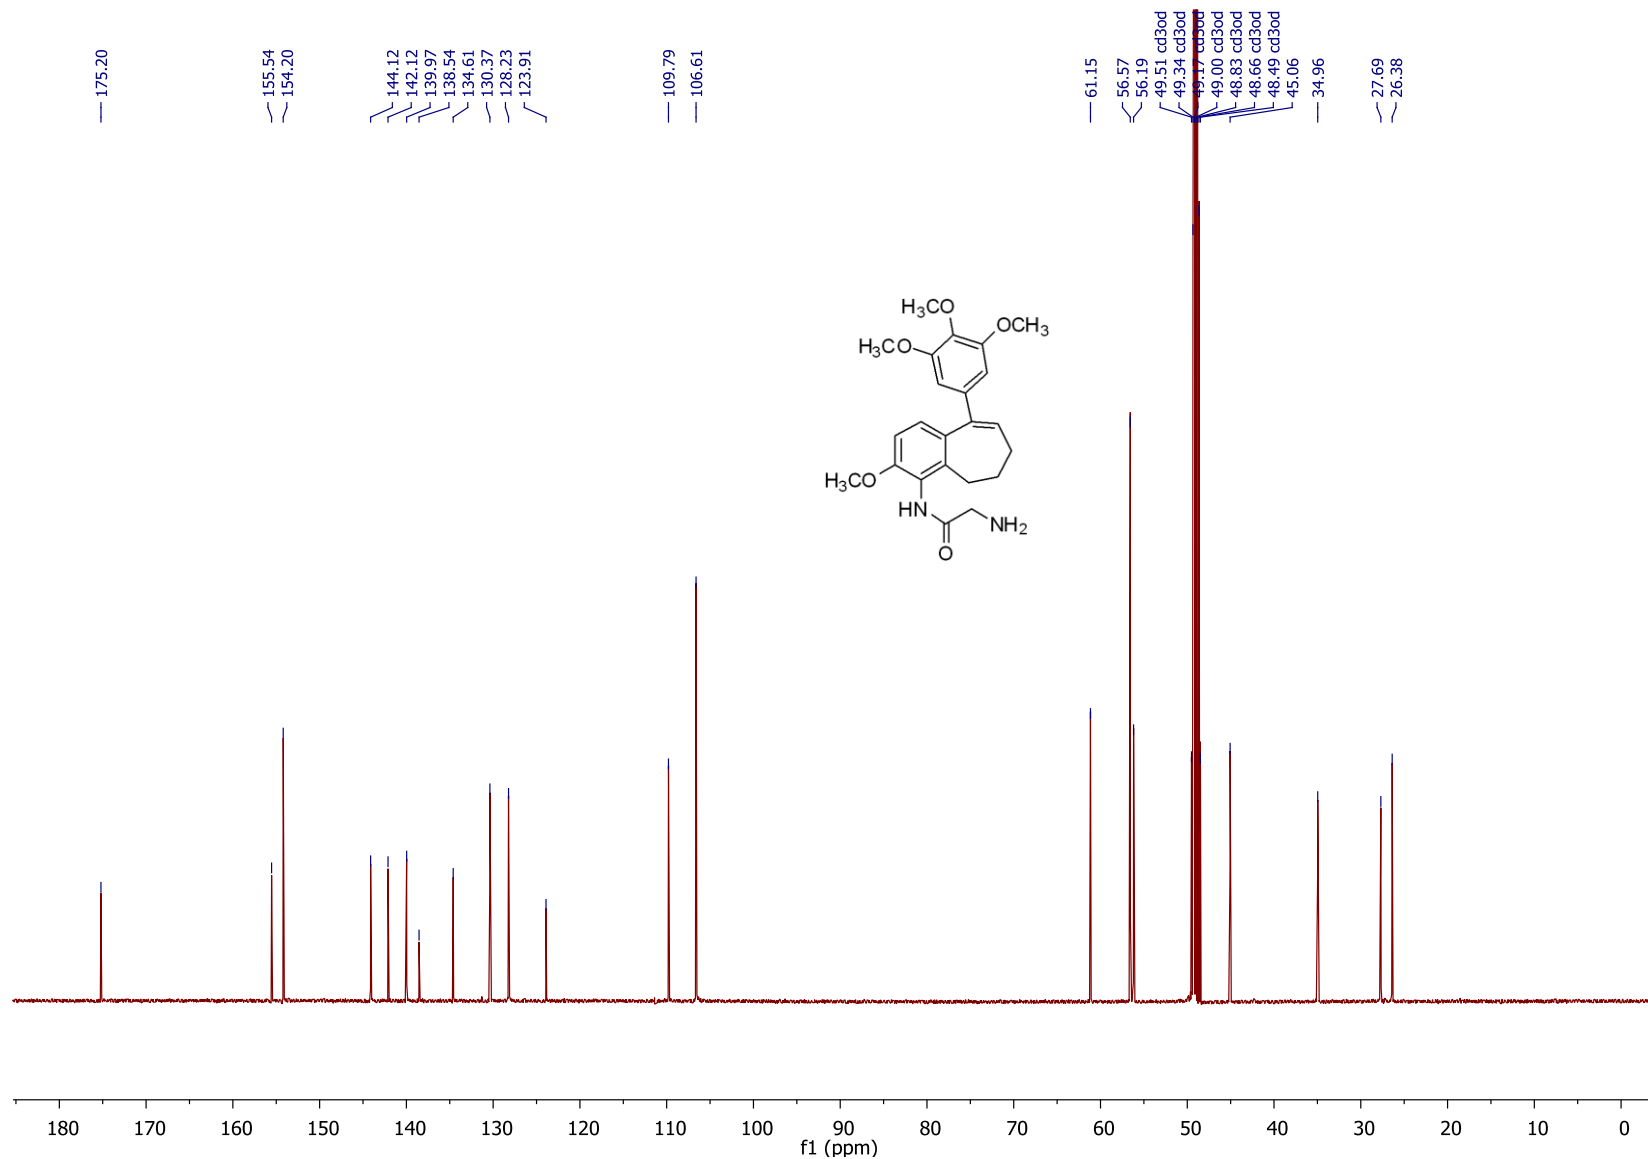

S204

# HRMS Compound 43

C:\Xcalibur\...CML\_IL\_091\_ORBL+ESI

2/13/2013 5:26:54 PM

CML\_IL\_091

CML\_IL\_091\_ORBL+ESI #20 RT: 0.18 AV: 1 NL  
T: FTMS + p ESI Full ms [170.00-2000.00]

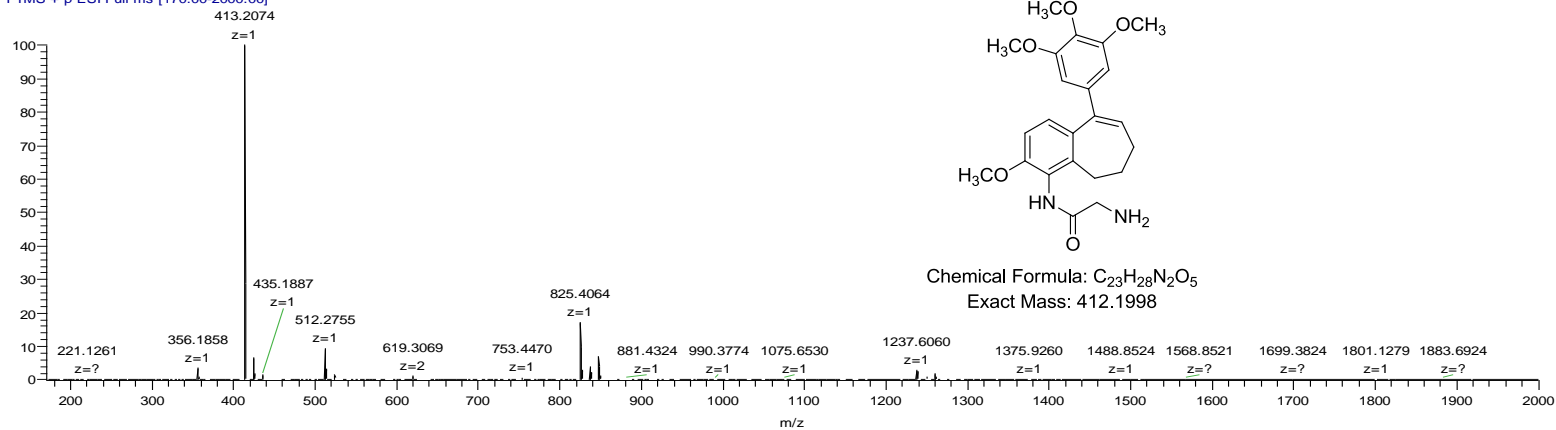

cml\_il\_091\_fs\_orbi+esi #16 RT: 0.18 AV: 1 NL: 2.41E9  
T: FTMS + p ESI Full ms2 413.21@cid35.00 [110.00-2000.00]

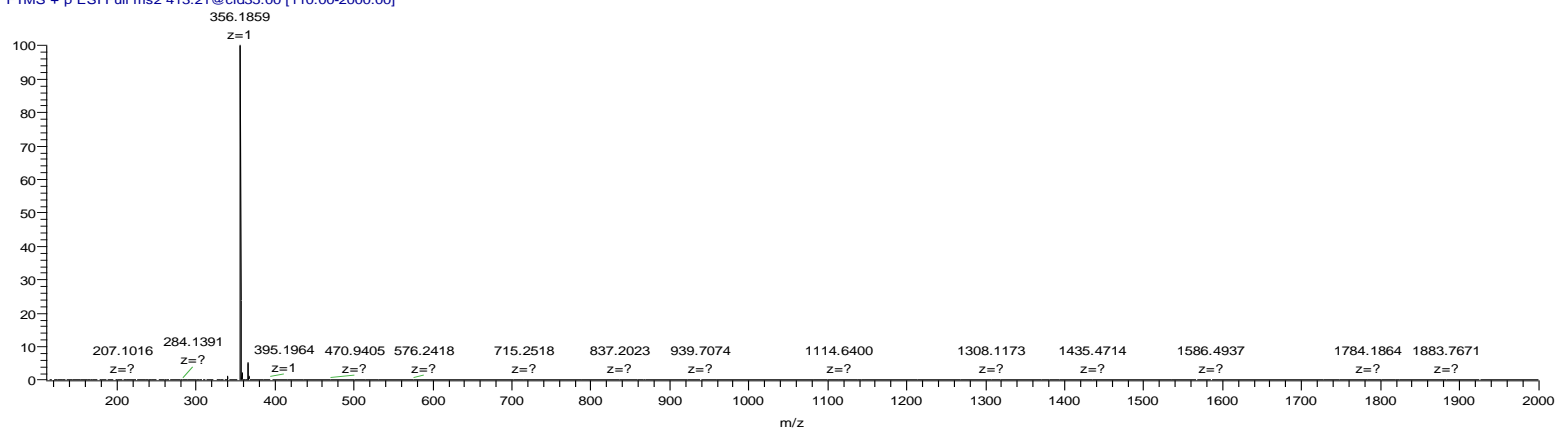

# HPLC for Compound 43

Data File C:\CHEM32\1\DATA\ERIC LIN\CML-II-091-R109.D

Sample Name: CML-II-091-run1

=====  
Acq. Operator : Eric Lin  
Acq. Instrument : Instrument 1 Location : -  
Injection Date : 2/13/2013 3:57:47 PM  
Acq. Method : C:\CHEM32\1\METHODS\MASTERMETHOD.M  
Last changed : 2/13/2013 3:54:29 PM by Eric Lin  
Analysis Method : C:\CHEM32\1\DATA\ERIC LIN\CML-II-091-R109.D\DA.M (MASTERMETHOD.M)  
Last changed : 2/13/2013 4:48:00 PM by Eric Lin

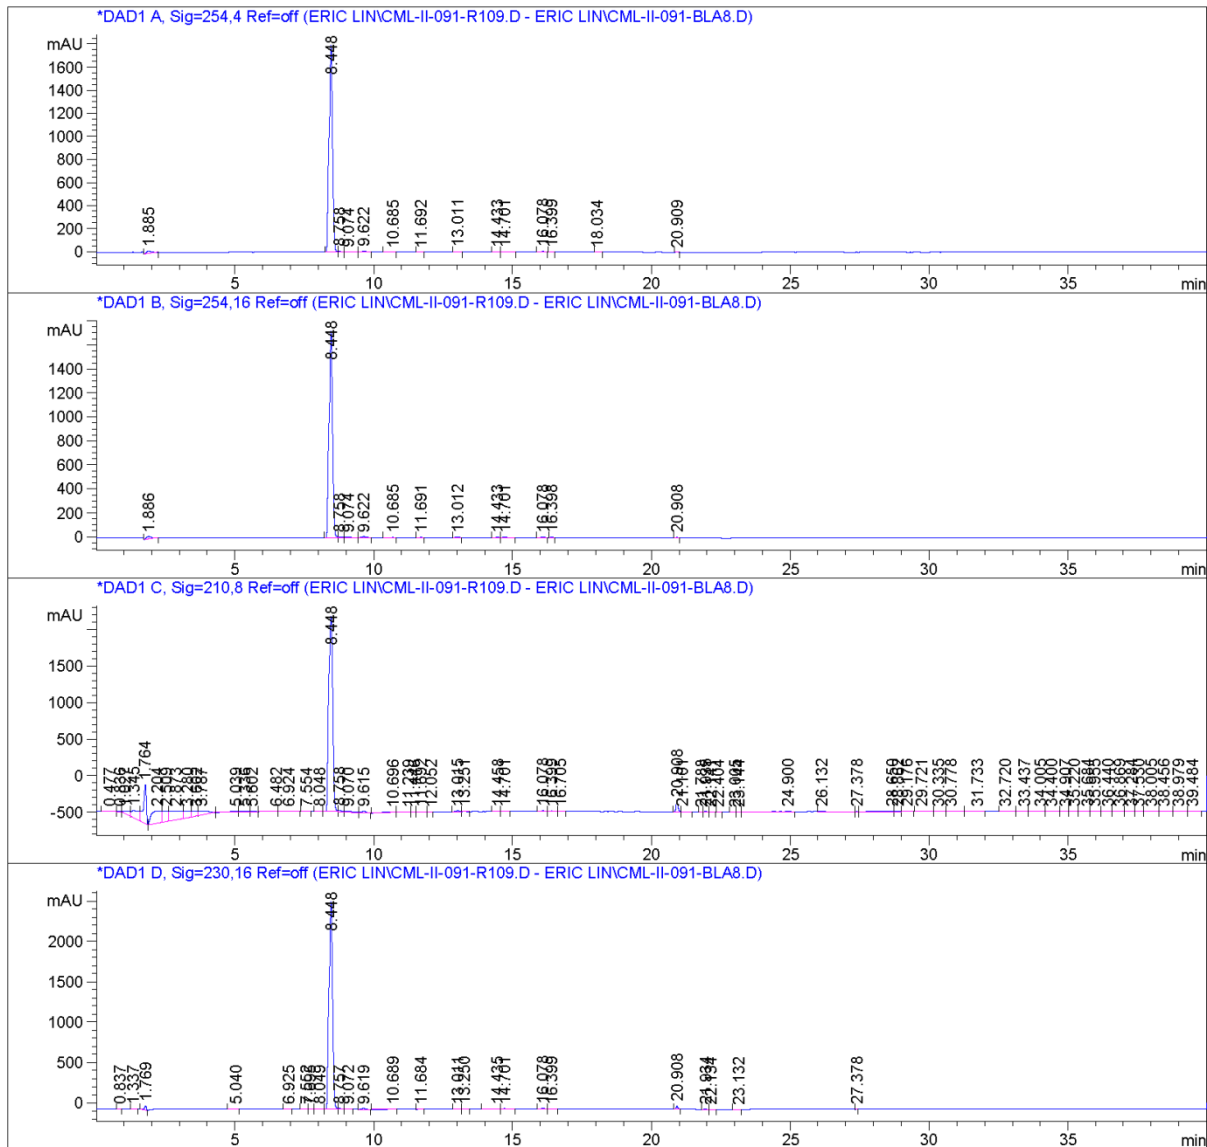

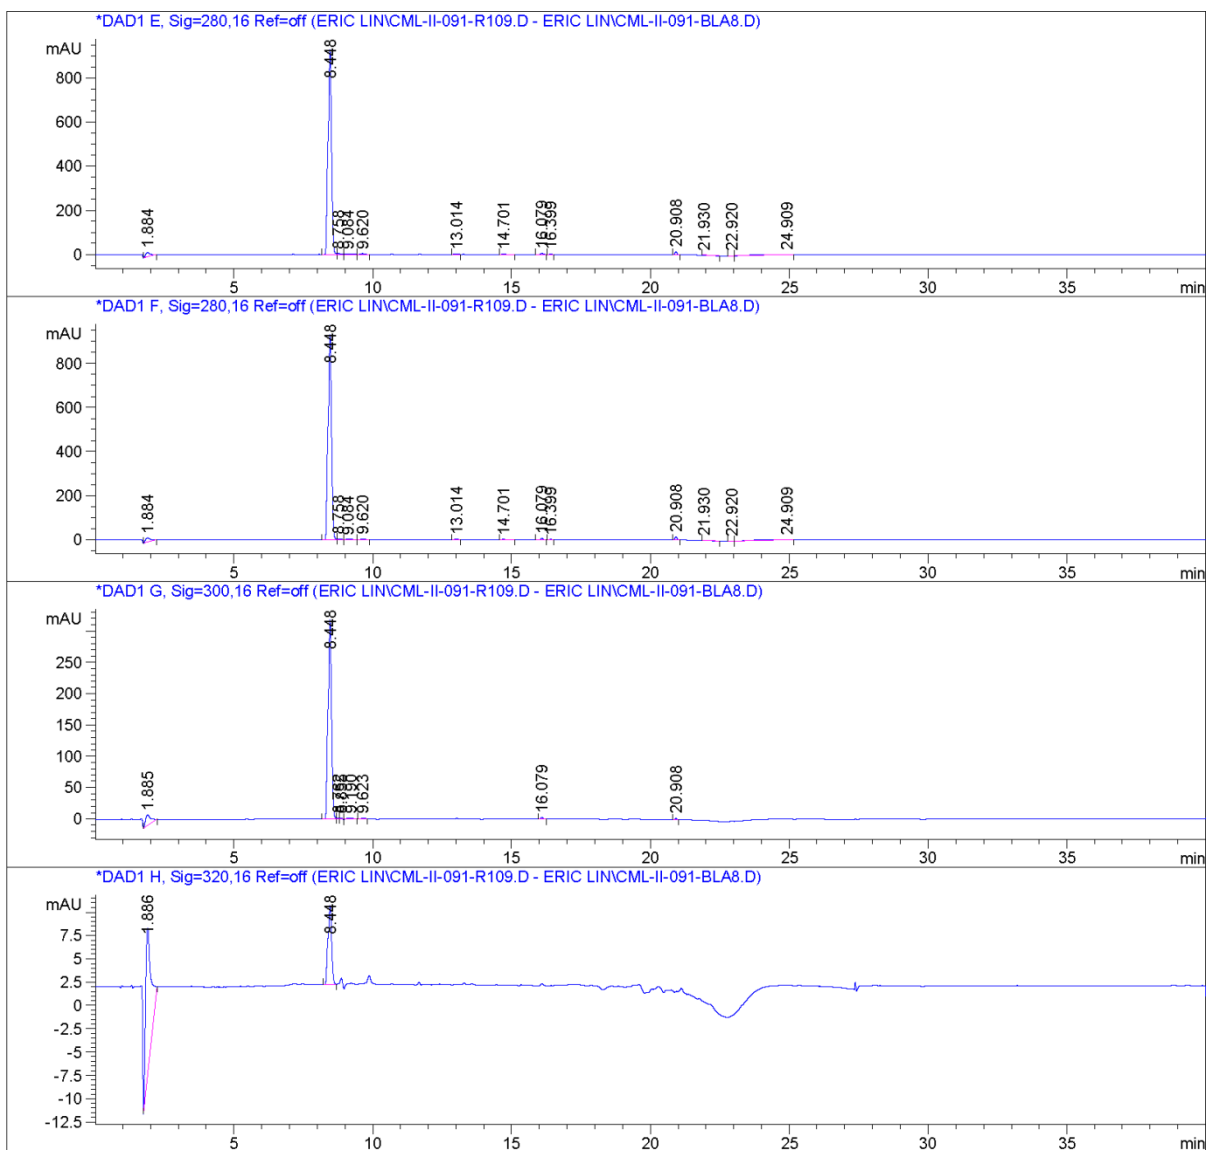

=====  
Area Percent Report  
=====

Sorted By : Signal  
Multiplier : 1.0000  
Dilution : 1.0000  
Use Multiplier & Dilution Factor with ISTDs

Data File C:\CHEM32\1\DATA\ERIC LIN\CML-II-091-R109.D  
Sample Name: CML-II-091-run1

Signal 1: DAD1 A, Sig=254,4 Ref=off  
Signal has been modified after loading from rawdata file!

| Peak # | RetTime [min] | Type | Width [min] | Area [mAU*s] | Height [mAU] | Area %  |
|--------|---------------|------|-------------|--------------|--------------|---------|
| 1      | 1.885         | BB   | 0.2087      | 303.67535    | 22.32442     | 1.8885  |
| 2      | 8.448         | BV   | 0.1222      | 1.54340e4    | 1796.28943   | 95.9830 |
| 3      | 8.758         | VV   | 0.1012      | 43.91451     | 5.87406      | 0.2731  |
| 4      | 9.074         | VB   | 0.1413      | 30.87476     | 2.92129      | 0.1920  |
| 5      | 9.622         | BB   | 0.1462      | 81.67364     | 7.67224      | 0.5079  |
| 6      | 10.685        | BB   | 0.1368      | 10.20960     | 1.03738      | 0.0635  |
| 7      | 11.692        | BB   | 0.1086      | 8.05322      | 1.19470      | 0.0501  |
| 8      | 13.011        | BV   | 0.1354      | 46.89869     | 5.62008      | 0.2917  |
| 9      | 14.433        | BV   | 0.0991      | 17.61300     | 2.66349      | 0.1095  |
| 10     | 14.701        | VB   | 0.0991      | 31.21455     | 4.85003      | 0.1941  |
| 11     | 16.078        | BB   | 0.0893      | 42.34123     | 7.33771      | 0.2633  |
| 12     | 16.399        | BB   | 0.0791      | 11.89078     | 2.34849      | 0.0739  |
| 13     | 18.034        | BB   | 0.0979      | 7.92484      | 1.18623      | 0.0493  |
| 14     | 20.909        | BB   | 0.0737      | 9.65385      | 2.09784      | 0.0600  |

Totals : 1.60800e4 1863.41738

Signal 2: DAD1 B, Sig=254,16 Ref=off  
Signal has been modified after loading from rawdata file!

| Peak # | RetTime [min] | Type | Width [min] | Area [mAU*s] | Height [mAU] | Area %  |
|--------|---------------|------|-------------|--------------|--------------|---------|
| 1      | 1.886         | BB   | 0.2082      | 292.19580    | 21.55061     | 1.8910  |
| 2      | 8.448         | BV   | 0.1222      | 1.48160e4    | 1725.56189   | 95.8863 |
| 3      | 8.758         | VV   | 0.1040      | 46.97472     | 6.09177      | 0.3040  |
| 4      | 9.074         | VV   | 0.1676      | 40.01356     | 3.12126      | 0.2590  |
| 5      | 9.622         | VB   | 0.1509      | 84.10874     | 7.61149      | 0.5443  |
| 6      | 10.685        | BB   | 0.1363      | 9.81310      | 1.00172      | 0.0635  |
| 7      | 11.691        | BB   | 0.1095      | 8.22453      | 1.17736      | 0.0532  |
| 8      | 13.012        | BV   | 0.1353      | 44.79118     | 5.37278      | 0.2899  |
| 9      | 14.433        | BV   | 0.1025      | 14.41688     | 2.14135      | 0.0933  |
| 10     | 14.701        | VB   | 0.0986      | 30.12296     | 4.71390      | 0.1950  |
| 11     | 16.078        | BB   | 0.0892      | 41.94569     | 7.27688      | 0.2715  |
| 12     | 16.398        | BB   | 0.0787      | 11.48548     | 2.28234      | 0.0743  |
| 13     | 20.908        | BB   | 0.0722      | 11.53259     | 2.48224      | 0.0746  |

Totals : 1.54516e4 1790.38559



Data File C:\CHEM32\1\DATA\ERIC LIN\CML-II-091-R109.D  
Sample Name: CML-II-091-run1

Signal 3: DAD1 C, Sig=210,8 Ref=off  
Signal has been modified after loading from rawdata file!

| Peak # | RetTime [min] | Type | Width [min] | Area [mAU*s] | Height [mAU] | Area %  |
|--------|---------------|------|-------------|--------------|--------------|---------|
| 1      | 0.477         | BV   | 0.2906      | 92.21676     | 4.09649      | 0.1728  |
| 2      | 0.836         | VB   | 0.0805      | 53.20325     | 9.33237      | 0.0997  |
| 3      | 1.027         | BV   | 0.3305      | 670.57526    | 27.30559     | 1.2565  |
| 4      | 1.345         | VV   | 0.2675      | 2115.05591   | 99.71152     | 3.9631  |
| 5      | 1.764         | VB   | 0.1102      | 3927.80103   | 531.70923    | 7.3597  |
| 6      | 2.204         | BV   | 0.4097      | 4284.61621   | 164.61928    | 8.0282  |
| 7      | 2.509         | VV   | 0.2153      | 2180.02832   | 143.45102    | 4.0848  |
| 8      | 2.873         | VV   | 0.3862      | 3652.52368   | 119.61574    | 6.8439  |
| 9      | 3.280         | VV   | 0.2287      | 1475.25244   | 88.38440     | 2.7642  |
| 10     | 3.602         | VV   | 0.2097      | 989.25763    | 65.68133     | 1.8536  |
| 11     | 3.787         | VB   | 0.3572      | 1286.01184   | 52.61129     | 2.4096  |
| 12     | 5.039         | BV   | 0.3271      | 351.56982    | 13.18396     | 0.6587  |
| 13     | 5.336         | VV   | 0.2700      | 179.99951    | 8.26615      | 0.3373  |
| 14     | 5.602         | VB   | 0.1725      | 54.66105     | 4.54023      | 0.1024  |
| 15     | 6.482         | BV   | 0.3940      | 113.11806    | 3.49148      | 0.2120  |
| 16     | 6.924         | VB   | 0.2796      | 163.18980    | 7.16936      | 0.3058  |
| 17     | 7.554         | BB   | 0.1327      | 20.66869     | 2.30251      | 0.0387  |
| 18     | 8.048         | BB   | 0.1226      | 46.82283     | 5.12485      | 0.0877  |
| 19     | 8.448         | BV   | 0.1479      | 2.70409e4    | 2675.88184   | 50.6674 |
| 20     | 8.758         | VV   | 0.1307      | 207.94093    | 20.79608     | 0.3896  |
| 21     | 9.070         | VV   | 0.2763      | 388.74979    | 17.56201     | 0.7284  |
| 22     | 9.615         | VB   | 0.1742      | 307.48911    | 23.89076     | 0.5762  |
| 23     | 10.696        | BV   | 0.4404      | 335.67877    | 9.31619      | 0.6290  |
| 24     | 11.239        | VV   | 0.4456      | 157.50700    | 4.35884      | 0.2951  |
| 25     | 11.446        | VB   | 0.1477      | 21.31094     | 1.97792      | 0.0399  |
| 26     | 11.692        | BV   | 0.1490      | 33.04355     | 3.24023      | 0.0619  |
| 27     | 12.052        | VB   | 0.0919      | 7.33788      | 1.26097      | 0.0137  |
| 28     | 13.015        | BV   | 0.1273      | 93.54889     | 11.94884     | 0.1753  |
| 29     | 13.251        | VB   | 0.1058      | 10.98901     | 1.53050      | 0.0206  |
| 30     | 14.458        | BV   | 0.1543      | 10.71459     | 1.09359      | 0.0201  |
| 31     | 14.701        | VB   | 0.0971      | 60.09192     | 9.59263      | 0.1126  |
| 32     | 16.078        | BV   | 0.0922      | 86.43350     | 14.35692     | 0.1620  |
| 33     | 16.399        | VV   | 0.0996      | 68.47499     | 10.03284     | 0.1283  |
| 34     | 16.705        | VB   | 0.1007      | 15.76245     | 2.27747      | 0.0295  |
| 35     | 20.908        | BV   | 0.0773      | 689.77765    | 140.49957    | 1.2925  |
| 36     | 21.101        | VB   | 0.1272      | 18.98328     | 2.06597      | 0.0356  |
| 37     | 21.788        | BV   | 0.0849      | 7.57358      | 1.36091      | 0.0142  |
| 38     | 21.935        | VV   | 0.0838      | 61.65607     | 11.26755     | 0.1155  |
| 39     | 22.141        | VB   | 0.1169      | 15.22546     | 1.87094      | 0.0285  |
| 40     | 22.404        | BB   | 0.0748      | 12.27476     | 2.61129      | 0.0230  |
| 41     | 23.005        | BV   | 0.0896      | 12.24500     | 1.99634      | 0.0229  |
| 42     | 23.144        | VV   | 0.1077      | 20.31472     | 2.70290      | 0.0381  |
| 43     | 24.900        | VB   | 1.7347      | 340.25699    | 2.32597      | 0.6376  |
| 44     | 26.132        | VB   | 0.9003      | 208.87184    | 2.81955      | 0.3914  |
| 45     | 27.378        | BV   | 0.0418      | 19.50561     | 6.35763      | 0.0365  |
| 46     | 28.650        | VV   | 1.0018      | 297.79904    | 3.55320      | 0.5580  |

Data File C:\CHEM32\1\DATA\ERIC LIN\CML-II-091-R109.D  
Sample Name: CML-II-091-run1

| Peak # | RetTime [min] | Type | Width [min] | Area [mAU*s] | Height [mAU] | Area % |
|--------|---------------|------|-------------|--------------|--------------|--------|
| 47     | 28.862        | VV   | 0.1958      | 47.13171     | 3.62181      | 0.0883 |
| 48     | 29.176        | VB   | 0.2655      | 66.63641     | 3.78308      | 0.1249 |
| 49     | 29.721        | BV   | 0.2670      | 154.19702    | 8.28990      | 0.2889 |
| 50     | 30.335        | VV   | 0.2156      | 48.99574     | 3.14722      | 0.0918 |
| 51     | 30.778        | VB   | 0.2976      | 74.64709     | 3.35520      | 0.1399 |
| 52     | 31.733        | BB   | 0.3347      | 92.02336     | 3.45542      | 0.1724 |
| 53     | 32.720        | BB   | 0.2971      | 61.00483     | 2.92722      | 0.1143 |
| 54     | 33.437        | BV   | 0.2381      | 46.26827     | 2.61943      | 0.0867 |
| 55     | 34.005        | VB   | 0.3248      | 74.92151     | 3.09050      | 0.1404 |
| 56     | 34.400        | BB   | 0.2370      | 51.44723     | 3.50920      | 0.0964 |
| 57     | 34.907        | BV   | 0.1647      | 32.06065     | 3.15101      | 0.0601 |
| 58     | 35.220        | VB   | 0.2098      | 23.26075     | 1.56117      | 0.0436 |
| 59     | 35.684        | BV   | 0.1994      | 24.30363     | 1.71397      | 0.0455 |
| 60     | 35.955        | VB   | 0.1758      | 27.64740     | 2.24256      | 0.0518 |
| 61     | 36.440        | BV   | 0.1933      | 25.35880     | 1.90497      | 0.0475 |
| 62     | 36.869        | VB   | 0.1773      | 39.94121     | 3.39431      | 0.0748 |
| 63     | 37.284        | BV   | 0.2028      | 38.22689     | 2.84392      | 0.0716 |
| 64     | 37.530        | VV   | 0.1852      | 34.93135     | 2.76789      | 0.0655 |
| 65     | 38.005        | VV   | 0.2773      | 62.55053     | 2.95101      | 0.1172 |
| 66     | 38.456        | VB   | 0.2762      | 47.11165     | 2.49561      | 0.0883 |
| 67     | 38.979        | BV   | 0.2542      | 45.89429     | 2.49911      | 0.0860 |
| 68     | 39.484        | VB   | 0.2220      | 43.82164     | 3.15564      | 0.0821 |

Totals : 5.33694e4 4407.62637

Signal 4: DAD1 D, Sig=230,16 Ref=off  
Signal has been modified after loading from rawdata file!

| Peak # | RetTime [min] | Type | Width [min] | Area [mAU*s] | Height [mAU] | Area %  |
|--------|---------------|------|-------------|--------------|--------------|---------|
| 1      | 0.837         | BB   | 0.0781      | 5.56431      | 1.20046      | 0.0231  |
| 2      | 1.337         | BB   | 0.1077      | 13.39890     | 1.86771      | 0.0556  |
| 3      | 1.769         | BB   | 0.0773      | 272.98090    | 53.73421     | 1.1318  |
| 4      | 5.040         | BB   | 0.0987      | 10.24736     | 1.44641      | 0.0425  |
| 5      | 6.925         | VB   | 0.1197      | 13.83992     | 1.52722      | 0.0574  |
| 6      | 7.552         | BV   | 0.1321      | 16.18779     | 1.77921      | 0.0671  |
| 7      | 7.695         | VV   | 0.0873      | 7.71480      | 1.26159      | 0.0320  |
| 8      | 8.049         | VB   | 0.1263      | 19.13415     | 2.02378      | 0.0793  |
| 9      | 8.448         | BV   | 0.1282      | 2.29623e4    | 2571.97168   | 95.2053 |
| 10     | 8.757         | VV   | 0.1048      | 72.72637     | 9.34707      | 0.3015  |
| 11     | 9.072         | VB   | 0.1160      | 37.48595     | 4.46290      | 0.1554  |
| 12     | 9.619         | BB   | 0.1460      | 136.21893    | 12.81127     | 0.5648  |
| 13     | 10.689        | BB   | 0.3011      | 48.31770     | 2.01960      | 0.2003  |
| 14     | 11.684        | BB   | 0.1430      | 24.21141     | 2.59154      | 0.1004  |
| 15     | 13.011        | BV   | 0.1363      | 53.04623     | 6.29419      | 0.2199  |
| 16     | 13.250        | VB   | 0.0996      | 7.95180      | 1.19580      | 0.0330  |
| 17     | 14.435        | BV   | 0.3300      | 32.17361     | 1.30322      | 0.1334  |

Instrument 1 2/13/2013 5:00:11 PM Eric Lin

Page 5 of 7

S210

Data File C:\CHEM32\1\DATA\ERIC LIN\CML-II-091-R109.D  
Sample Name: CML-II-091-run1

| Peak # | RetTime [min] | Type | Width [min] | Area [mAU*s] | Height [mAU] | Area % |
|--------|---------------|------|-------------|--------------|--------------|--------|
| 18     | 14.701        | VB   | 0.1034      | 54.05129     | 7.93924      | 0.2241 |
| 19     | 16.078        | BB   | 0.0889      | 73.22536     | 12.76157     | 0.3036 |
| 20     | 16.399        | BV   | 0.1012      | 36.36917     | 5.22610      | 0.1508 |
| 21     | 20.908        | BB   | 0.0765      | 171.37622    | 35.40434     | 0.7106 |
| 22     | 21.934        | BV   | 0.0841      | 17.05586     | 3.10618      | 0.0707 |
| 23     | 22.134        | VV   | 0.1344      | 11.14204     | 1.17699      | 0.0462 |
| 24     | 23.132        | BB   | 0.1046      | 11.67745     | 1.64870      | 0.0484 |
| 25     | 27.378        | BB   | 0.0323      | 10.31213     | 4.56581      | 0.0428 |

Totals : 2.41187e4 2748.66680

Signal 5: DAD1 E, Sig=280,16 Ref=off  
Signal has been modified after loading from rawdata file!

| Peak # | RetTime [min] | Type | Width [min] | Area [mAU*s] | Height [mAU] | Area %  |
|--------|---------------|------|-------------|--------------|--------------|---------|
| 1      | 1.884         | BB   | 0.1919      | 257.12570    | 19.75065     | 2.9011  |
| 2      | 8.448         | BV   | 0.1221      | 7991.19873   | 931.65533    | 90.1645 |
| 3      | 8.758         | VV   | 0.1162      | 37.21556     | 4.24881      | 0.4199  |
| 4      | 9.084         | VV   | 0.2509      | 55.30942     | 2.74731      | 0.6241  |
| 5      | 9.620         | VV   | 0.1660      | 57.15676     | 4.62927      | 0.6449  |
| 6      | 13.014        | BV   | 0.1304      | 25.37619     | 3.13567      | 0.2863  |
| 7      | 14.701        | BB   | 0.0984      | 14.28490     | 2.24054      | 0.1612  |
| 8      | 16.079        | BB   | 0.0889      | 33.30441     | 5.80521      | 0.3758  |
| 9      | 16.399        | BB   | 0.0788      | 7.59325      | 1.50537      | 0.0857  |
| 10     | 20.908        | BB   | 0.0766      | 66.62645     | 13.74501     | 0.7517  |
| 11     | 21.930        | BB   | 0.2128      | 18.59188     | 1.12523      | 0.2098  |
| 12     | 22.920        | BV   | 0.1313      | 11.14157     | 1.33532      | 0.1257  |
| 13     | 24.909        | VB   | 2.4737      | 287.98969    | 1.36046      | 3.2494  |

Totals : 8862.91449 993.28419

Signal 6: DAD1 F, Sig=280,16 Ref=off  
Signal has been modified after loading from rawdata file!

| Peak # | RetTime [min] | Type | Width [min] | Area [mAU*s] | Height [mAU] | Area %  |
|--------|---------------|------|-------------|--------------|--------------|---------|
| 1      | 1.884         | BB   | 0.1919      | 257.12570    | 19.75065     | 2.9011  |
| 2      | 8.448         | BV   | 0.1221      | 7991.19873   | 931.65533    | 90.1645 |
| 3      | 8.758         | VV   | 0.1162      | 37.21556     | 4.24881      | 0.4199  |
| 4      | 9.084         | VV   | 0.2509      | 55.30942     | 2.74731      | 0.6241  |
| 5      | 9.620         | VV   | 0.1660      | 57.15676     | 4.62927      | 0.6449  |
| 6      | 13.014        | BV   | 0.1304      | 25.37619     | 3.13567      | 0.2863  |
| 7      | 14.701        | BB   | 0.0984      | 14.28490     | 2.24054      | 0.1612  |

Data File C:\CHEM32\1\DATA\ERIC LIN\CML-II-091-R109.D  
Sample Name: CML-II-091-run1

| Peak # | RetTime [min] | Type | Width [min] | Area [mAU*s] | Height [mAU] | Area % |
|--------|---------------|------|-------------|--------------|--------------|--------|
| 8      | 16.079        | BB   | 0.0889      | 33.30441     | 5.80521      | 0.3758 |
| 9      | 16.399        | BB   | 0.0788      | 7.59325      | 1.50537      | 0.0857 |
| 10     | 20.908        | BB   | 0.0766      | 66.62645     | 13.74501     | 0.7517 |
| 11     | 21.930        | BB   | 0.2128      | 18.59188     | 1.12523      | 0.2098 |
| 12     | 22.920        | BV   | 0.1313      | 11.14157     | 1.33532      | 0.1257 |
| 13     | 24.909        | VB   | 2.4737      | 287.98969    | 1.36046      | 3.2494 |

Totals : 8862.91449 993.28419

Signal 7: DAD1 G, Sig=300,16 Ref=off  
Signal has been modified after loading from rawdata file!

| Peak # | RetTime [min] | Type | Width [min] | Area [mAU*s] | Height [mAU] | Area %  |
|--------|---------------|------|-------------|--------------|--------------|---------|
| 1      | 1.885         | BB   | 0.1997      | 241.76862    | 17.66125     | 7.8587  |
| 2      | 8.448         | BV   | 0.1224      | 2746.77637   | 319.03760    | 89.2840 |
| 3      | 8.762         | VV   | 0.0701      | 9.90111      | 1.98929      | 0.3218  |
| 4      | 8.855         | VB   | 0.0902      | 14.08478     | 2.41078      | 0.4578  |
| 5      | 9.190         | BB   | 0.2484      | 28.60969     | 1.50082      | 0.9300  |
| 6      | 9.623         | BB   | 0.1341      | 11.87181     | 1.23573      | 0.3859  |
| 7      | 16.079        | BB   | 0.0887      | 15.36226     | 2.68666      | 0.4994  |
| 8      | 20.908        | BB   | 0.0719      | 8.07447      | 1.74746      | 0.2625  |

Totals : 3076.44910 348.26959

Signal 8: DAD1 H, Sig=320,16 Ref=off  
Signal has been modified after loading from rawdata file!

| Peak # | RetTime [min] | Type | Width [min] | Area [mAU*s] | Height [mAU] | Area %  |
|--------|---------------|------|-------------|--------------|--------------|---------|
| 1      | 1.886         | BB   | 0.1964      | 216.25700    | 15.92820     | 73.9221 |
| 2      | 8.448         | BB   | 0.1286      | 76.29005     | 8.50886      | 26.0779 |

Totals : 292.54706 24.43706

=====  
\*\*\* End of Report \*\*\*

<sup>1</sup>H NMR (CD<sub>3</sub>OD, 500 MHz) Compound **44**

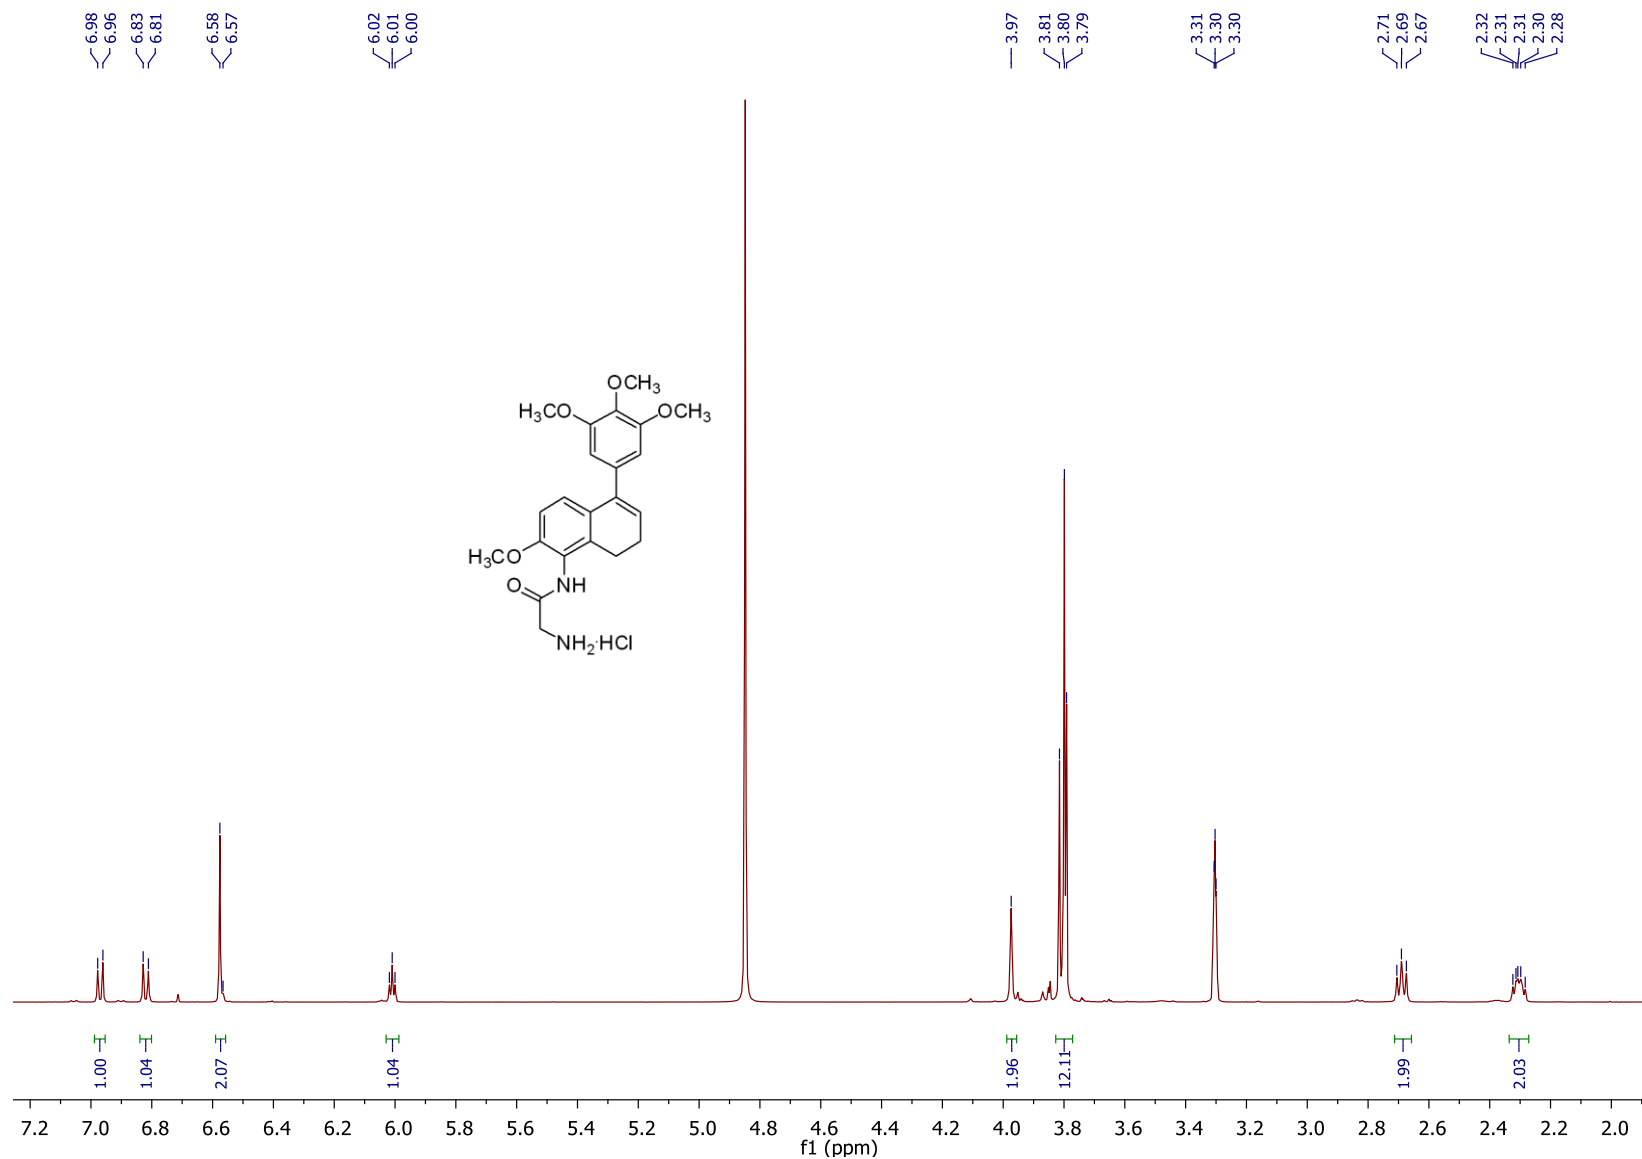

S213

<sup>13</sup>C NMR (CD<sub>3</sub>OD, 125 MHz) Compound **44**

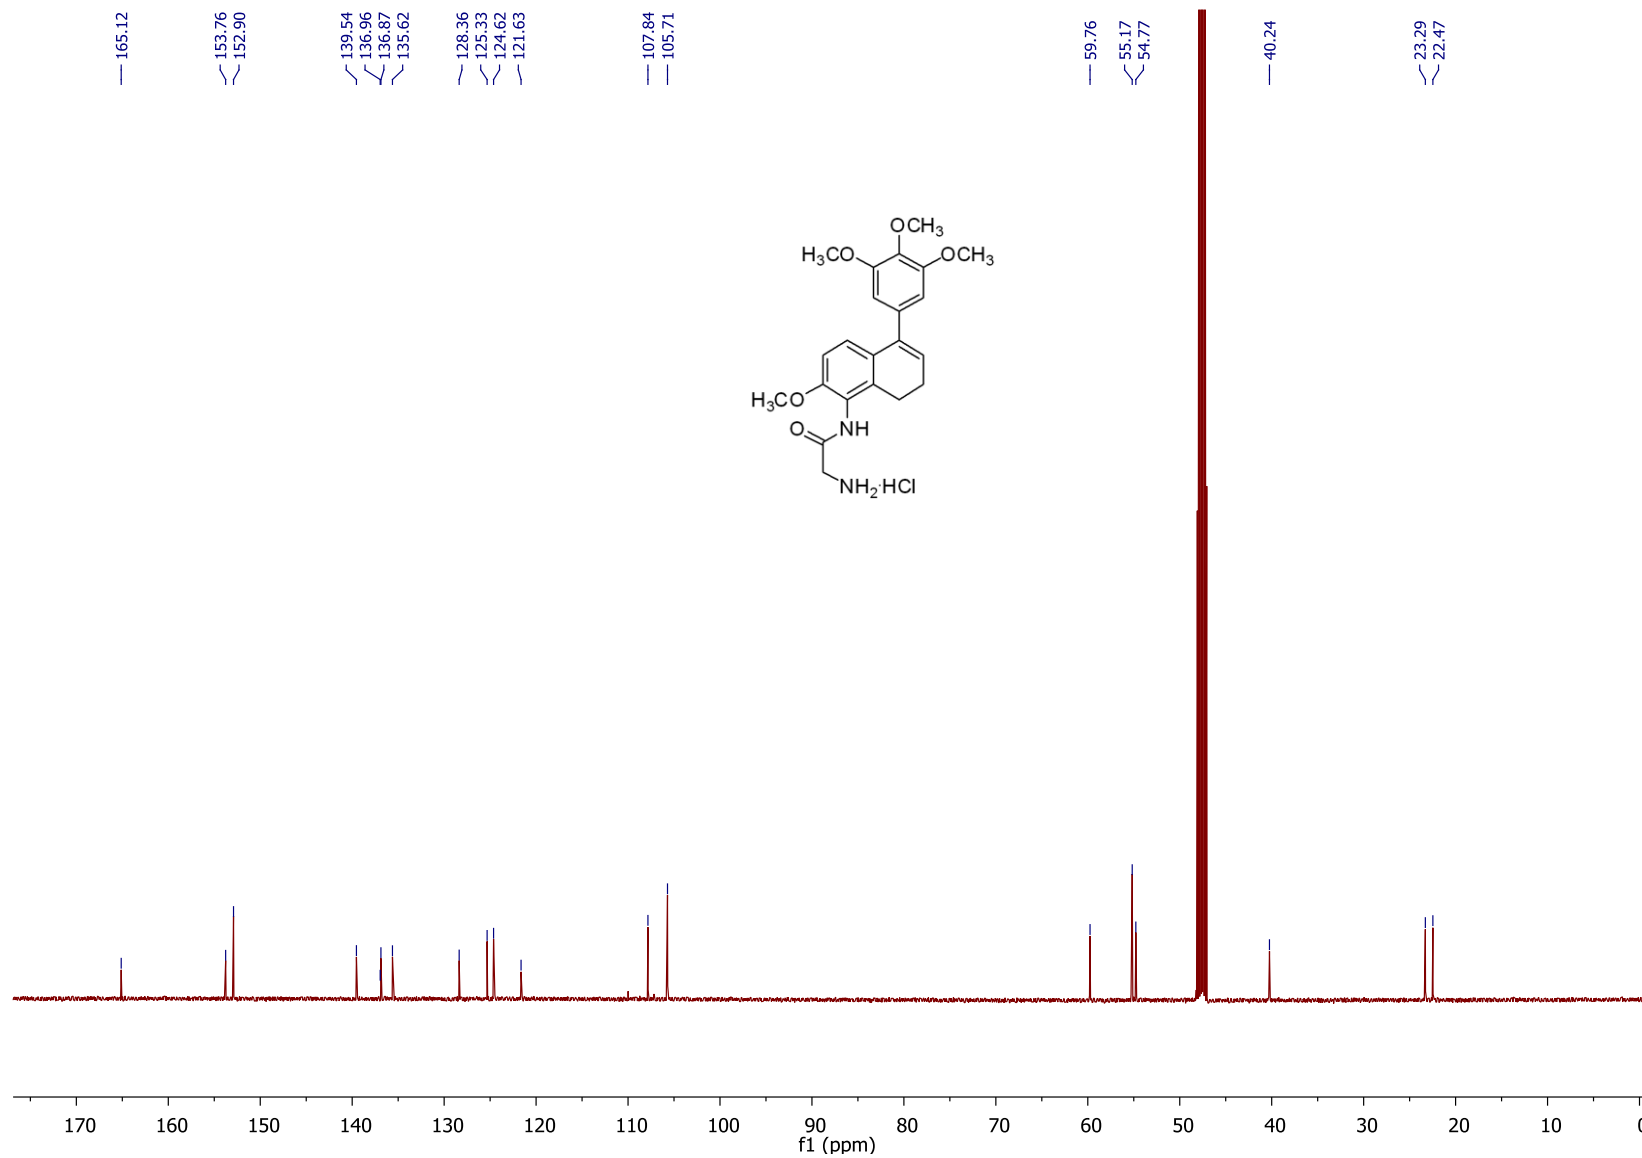

S214

# HRMS Compound 44

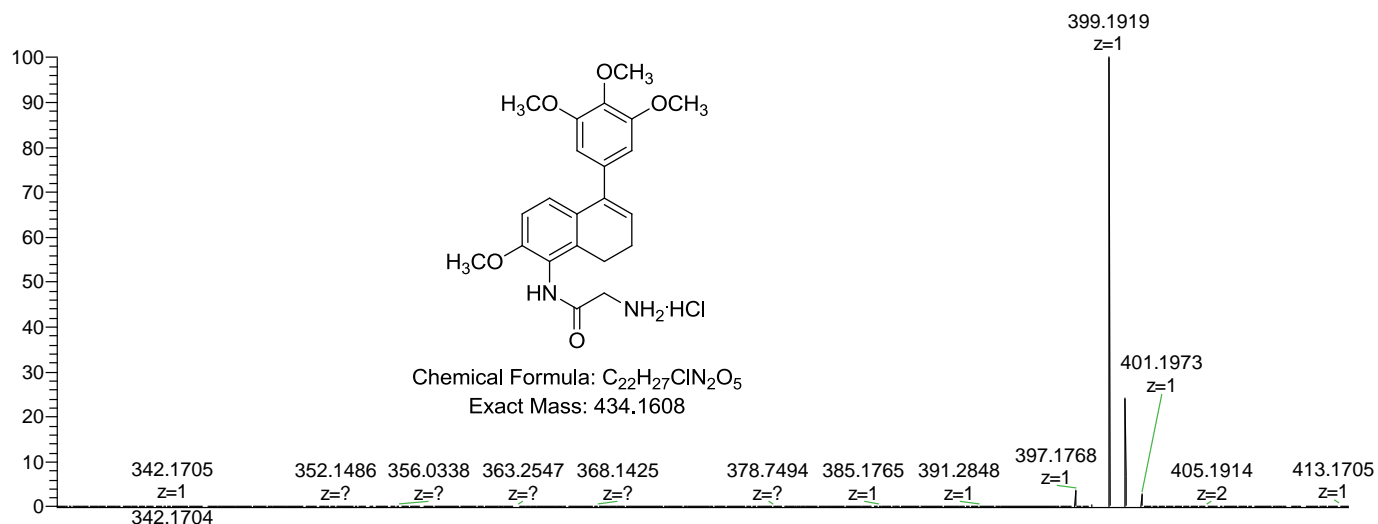

NL: 4.30E8  
CML\_1\_156\_MS^2\_raw\_Orbi\_+  
ESI\_Orbi\_+ESI#4-19 RT:  
0.03-0.18 AV: 16 T: FTMS + p  
ESI Full ms [50.00-500.00]

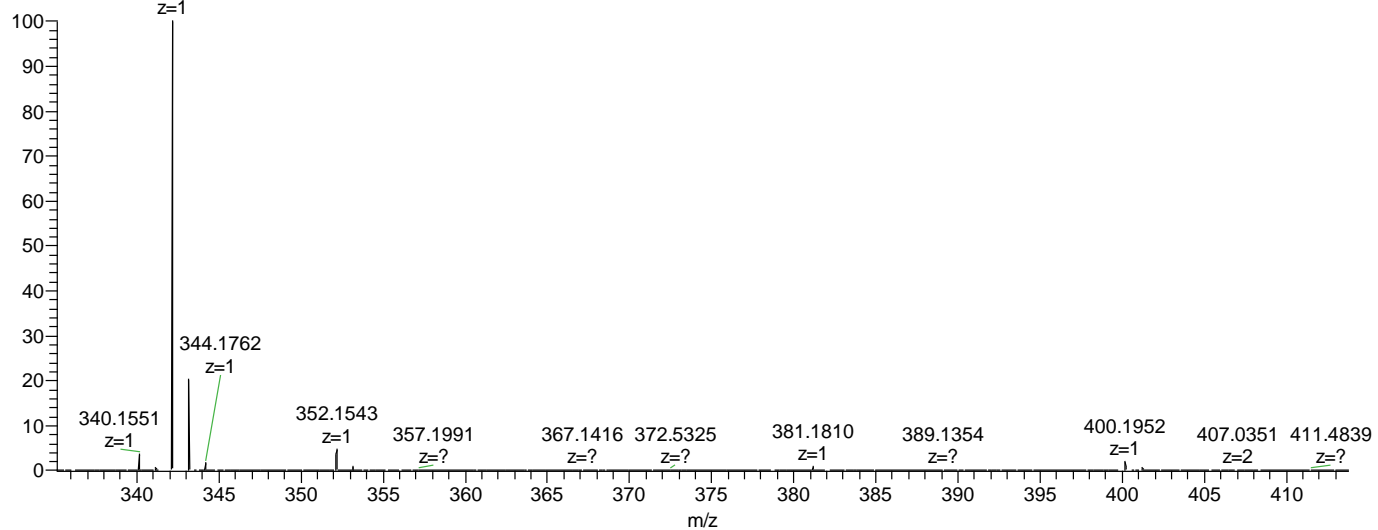

NL: 6.48E8  
cml\_1\_156\_ms\_fs\_raw\_orbi\_+  
esi\_orbi\_+esi#3-16 RT:  
0.03-0.18 AV: 14 T: FTMS + p  
ESI Full ms2 399.19@cid30.00  
[105.00-500.00]

# HPLC for Compound 44

Data File C:\CHEM32\1\DATA\ERIC LIN\1\_156\_RUN200010.D  
Sample Name: CML\_1\_156\_run2

=====  
Acq. Operator : ERIC LIN  
Acq. Instrument : Instrument 1 Location : -  
Injection Date : 8/7/2012 9:41:12 PM  
Acq. Method : C:\CHEM32\1\METHODS\MASTERMETHOD.M  
Last changed : 8/7/2012 9:37:06 PM by ERIC LIN  
(modified after loading)  
Analysis Method : C:\CHEM32\1\METHODS\MASTERMETHOD.M  
Last changed : 8/7/2012 10:31:04 PM by ERIC LIN  
(modified after loading)

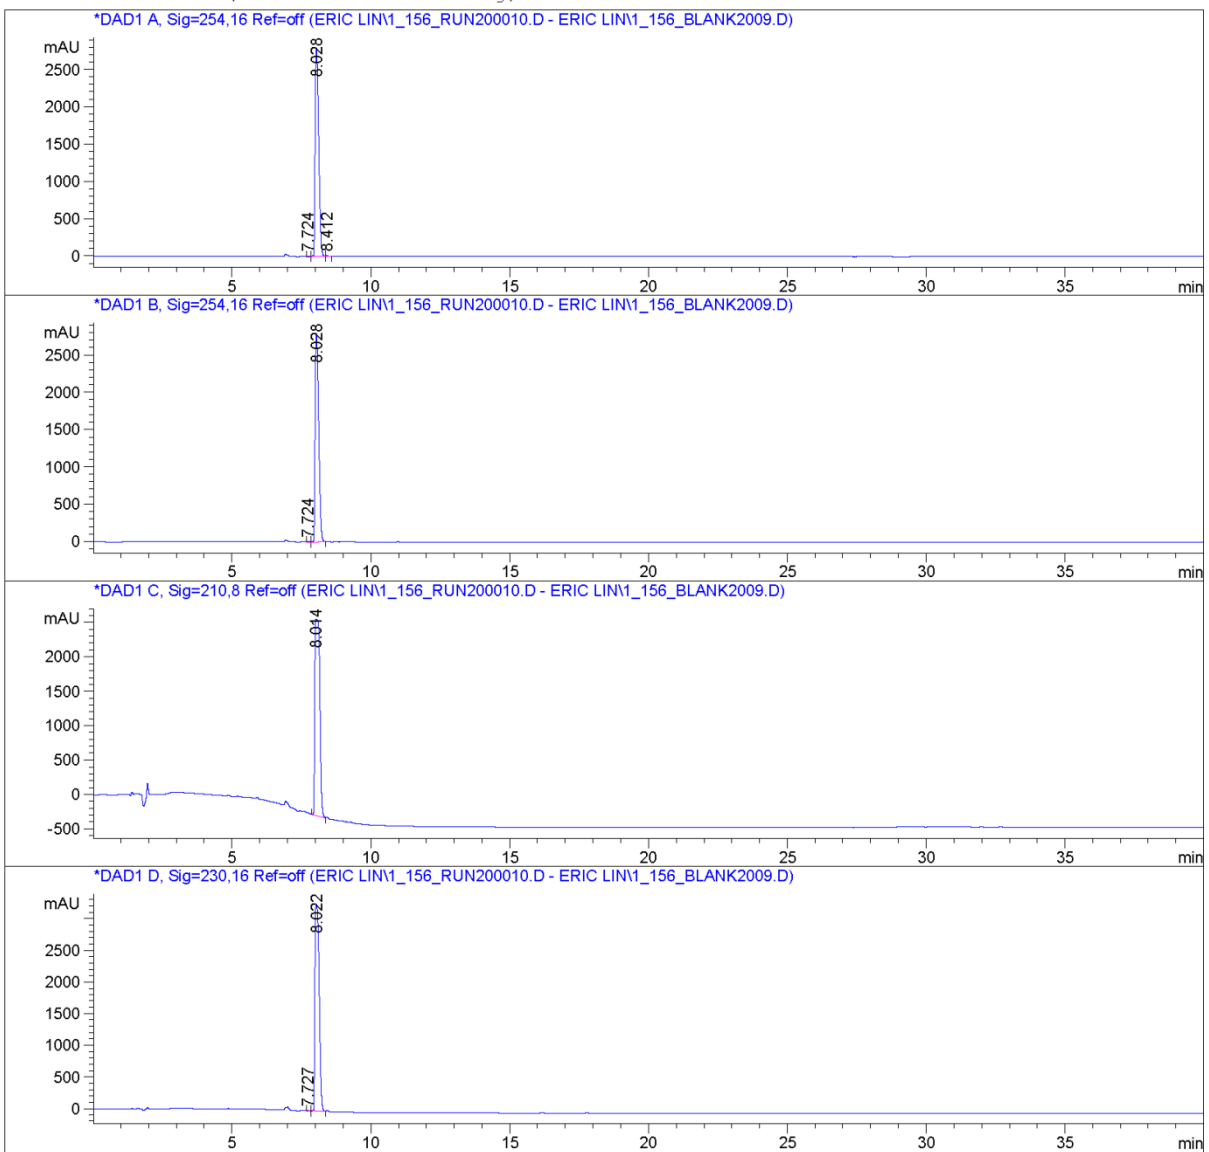



Data File C:\CHEM32\1\DATA\ERIC LIN\1\_156\_RUN200010.D

Sample Name: CML\_1\_156\_run2

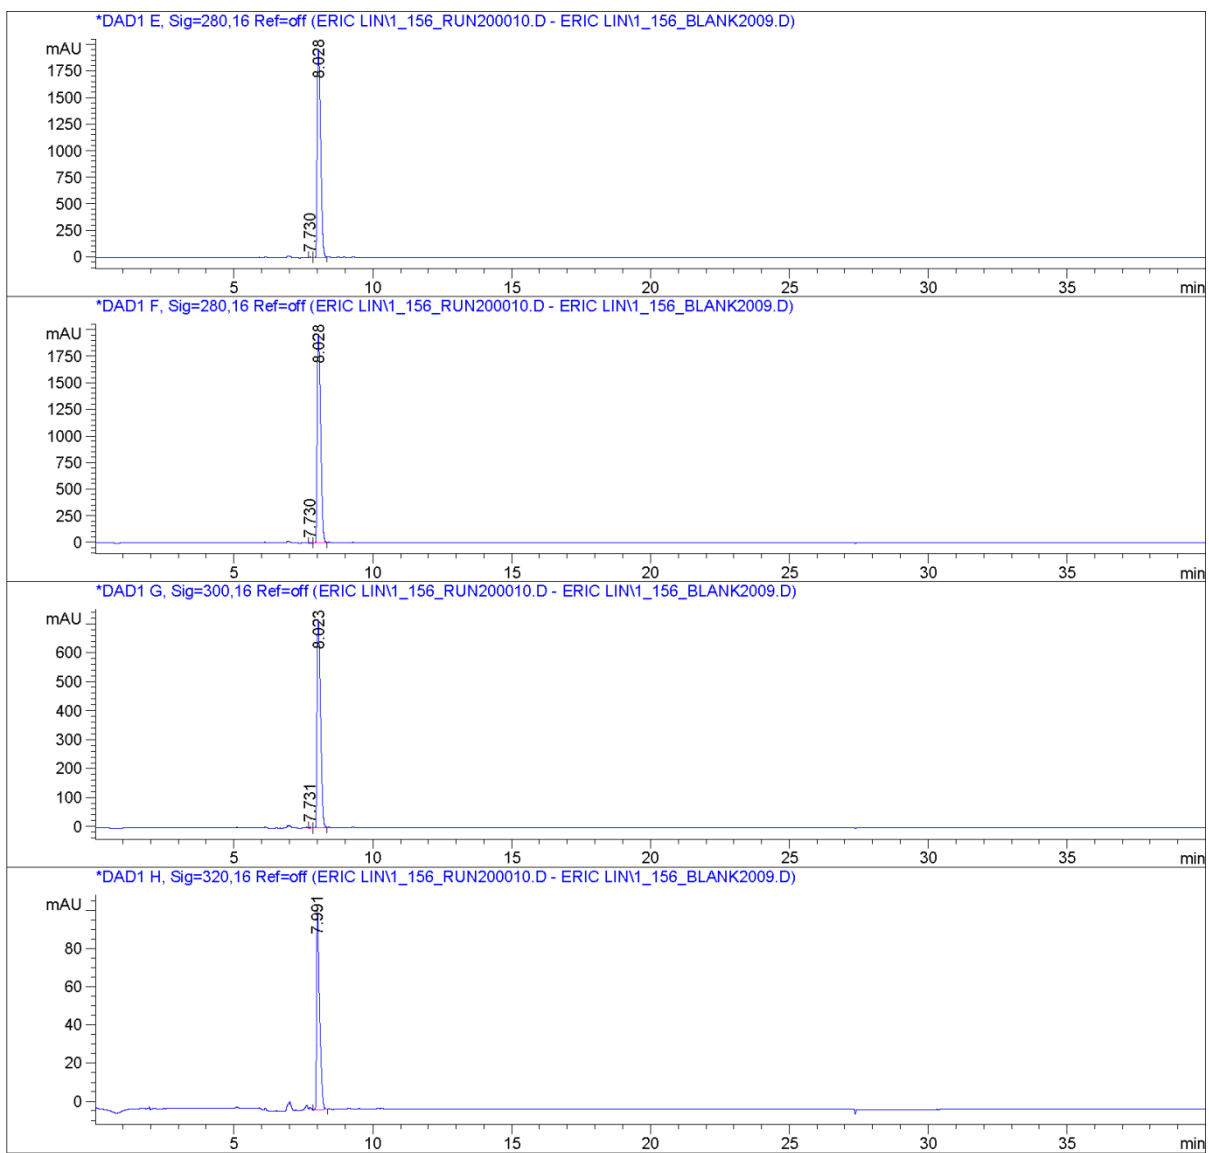

=====  
Area Percent Report  
=====

Sorted By : Signal  
Multiplier : 1.0000  
Dilution : 1.0000  
Use Multiplier & Dilution Factor with ISTDs

Data File C:\CHEM32\1\DATA\ERIC LIN\1\_156\_RUN200010.D  
Sample Name: CML\_1\_156\_run2

Signal 1: DAD1 A, Sig=254,16 Ref=off  
Signal has been modified after loading from rawdata file!

| Peak # | RetTime [min] | Type | Width [min] | Area [mAU*s] | Height [mAU] | Area %  |
|--------|---------------|------|-------------|--------------|--------------|---------|
| 1      | 7.724         | VV   | 0.1122      | 58.09821     | 6.90150      | 0.2336  |
| 2      | 8.028         | VV   | 0.1413      | 2.47516e4    | 2794.96948   | 99.5184 |
| 3      | 8.412         | VB   | 0.0864      | 61.67973     | 10.51692     | 0.2480  |

Totals :                           2.48714e4 2812.38790

Signal 2: DAD1 B, Sig=254,16 Ref=off  
Signal has been modified after loading from rawdata file!

| Peak # | RetTime [min] | Type | Width [min] | Area [mAU*s] | Height [mAU] | Area %  |
|--------|---------------|------|-------------|--------------|--------------|---------|
| 1      | 7.724         | VV   | 0.1122      | 58.09821     | 6.90150      | 0.2342  |
| 2      | 8.028         | VV   | 0.1413      | 2.47516e4    | 2794.96948   | 99.7658 |

Totals :                           2.48097e4 2801.87099

Signal 3: DAD1 C, Sig=210,8 Ref=off  
Signal has been modified after loading from rawdata file!

| Peak # | RetTime [min] | Type | Width [min] | Area [mAU*s] | Height [mAU] | Area %   |
|--------|---------------|------|-------------|--------------|--------------|----------|
| 1      | 8.014         | VV   | 0.1645      | 3.54314e4    | 2861.09155   | 100.0000 |

Totals :                           3.54314e4 2861.09155

Signal 4: DAD1 D, Sig=230,16 Ref=off  
Signal has been modified after loading from rawdata file!

| Peak # | RetTime [min] | Type | Width [min] | Area [mAU*s] | Height [mAU] | Area %  |
|--------|---------------|------|-------------|--------------|--------------|---------|
| 1      | 7.727         | VB   | 0.0929      | 50.91706     | 7.52660      | 0.1468  |
| 2      | 8.022         | BV   | 0.1757      | 3.46356e4    | 3266.68286   | 99.8532 |

Totals :                           3.46865e4 3274.20946

Data File C:\CHEM32\1\DATA\ERIC LIN\1\_156\_RUN200010.D  
Sample Name: CML\_1\_156\_run2

Signal 5: DAD1 E, Sig=280,16 Ref=off  
Signal has been modified after loading from rawdata file!

| Peak # | RetTime [min] | Type | Width [min] | Area [mAU*s] | Height [mAU] | Area %  |
|--------|---------------|------|-------------|--------------|--------------|---------|
| 1      | 7.730         | VV   | 0.1146      | 51.66423     | 6.11322      | 0.3020  |
| 2      | 8.028         | VV   | 0.1375      | 1.70565e4    | 1960.77515   | 99.6980 |

Totals : 1.71082e4 1966.88837

Signal 6: DAD1 F, Sig=280,16 Ref=off  
Signal has been modified after loading from rawdata file!

| Peak # | RetTime [min] | Type | Width [min] | Area [mAU*s] | Height [mAU] | Area %  |
|--------|---------------|------|-------------|--------------|--------------|---------|
| 1      | 7.730         | VV   | 0.1146      | 51.66423     | 6.11322      | 0.3020  |
| 2      | 8.028         | VV   | 0.1375      | 1.70565e4    | 1960.77515   | 99.6980 |

Totals : 1.71082e4 1966.88837

Signal 7: DAD1 G, Sig=300,16 Ref=off  
Signal has been modified after loading from rawdata file!

| Peak # | RetTime [min] | Type | Width [min] | Area [mAU*s] | Height [mAU] | Area %  |
|--------|---------------|------|-------------|--------------|--------------|---------|
| 1      | 7.731         | VV   | 0.0987      | 26.19738     | 3.69741      | 0.4170  |
| 2      | 8.023         | VV   | 0.1374      | 6256.75488   | 719.75366    | 99.5830 |

Totals : 6282.95226 723.45107

Signal 8: DAD1 H, Sig=320,16 Ref=off  
Signal has been modified after loading from rawdata file!

| Peak # | RetTime [min] | Type | Width [min] | Area [mAU*s] | Height [mAU] | Area %   |
|--------|---------------|------|-------------|--------------|--------------|----------|
| 1      | 7.991         | VV   | 0.1072      | 785.54877    | 107.56760    | 100.0000 |

Totals : 785.54877 107.56760

=====  
\*\*\* End of Report \*\*\*

<sup>1</sup>H NMR (CD<sub>3</sub>OD, 500 MHz) Compound **45**

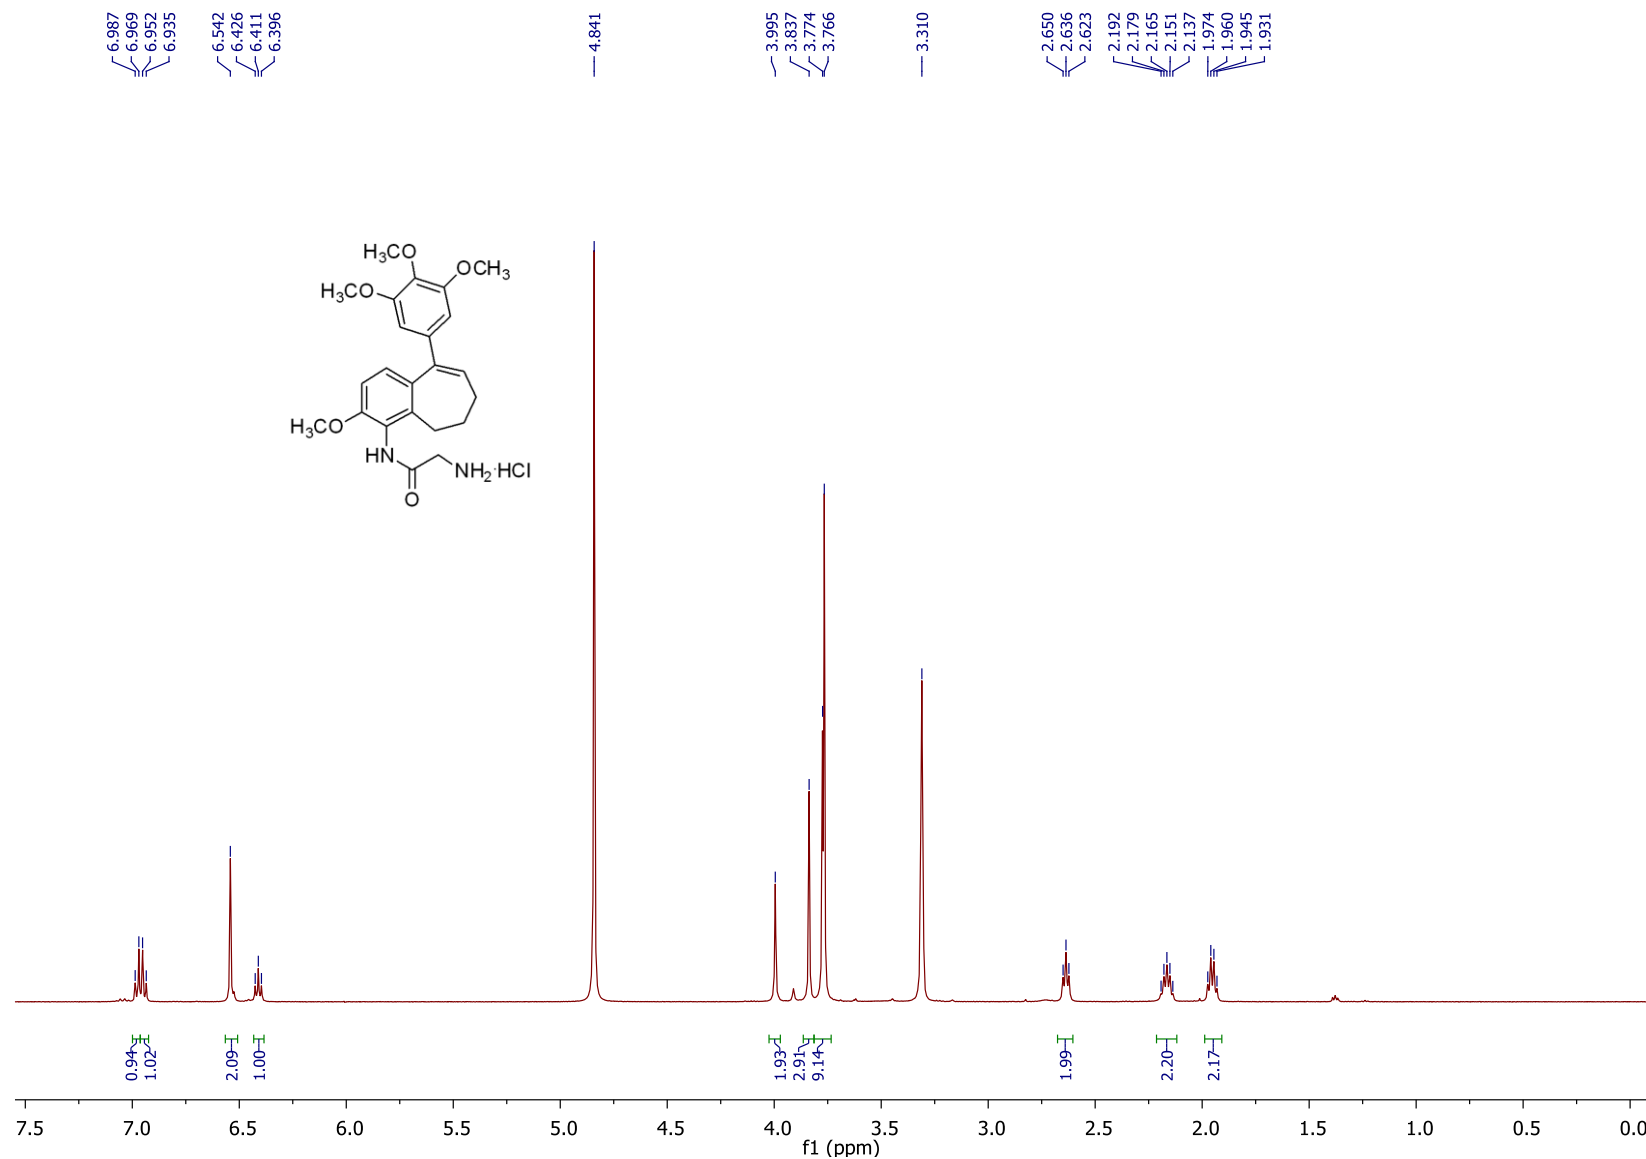

S220

<sup>13</sup>C NMR (CD<sub>3</sub>OD, 125 MHz) Compound 45

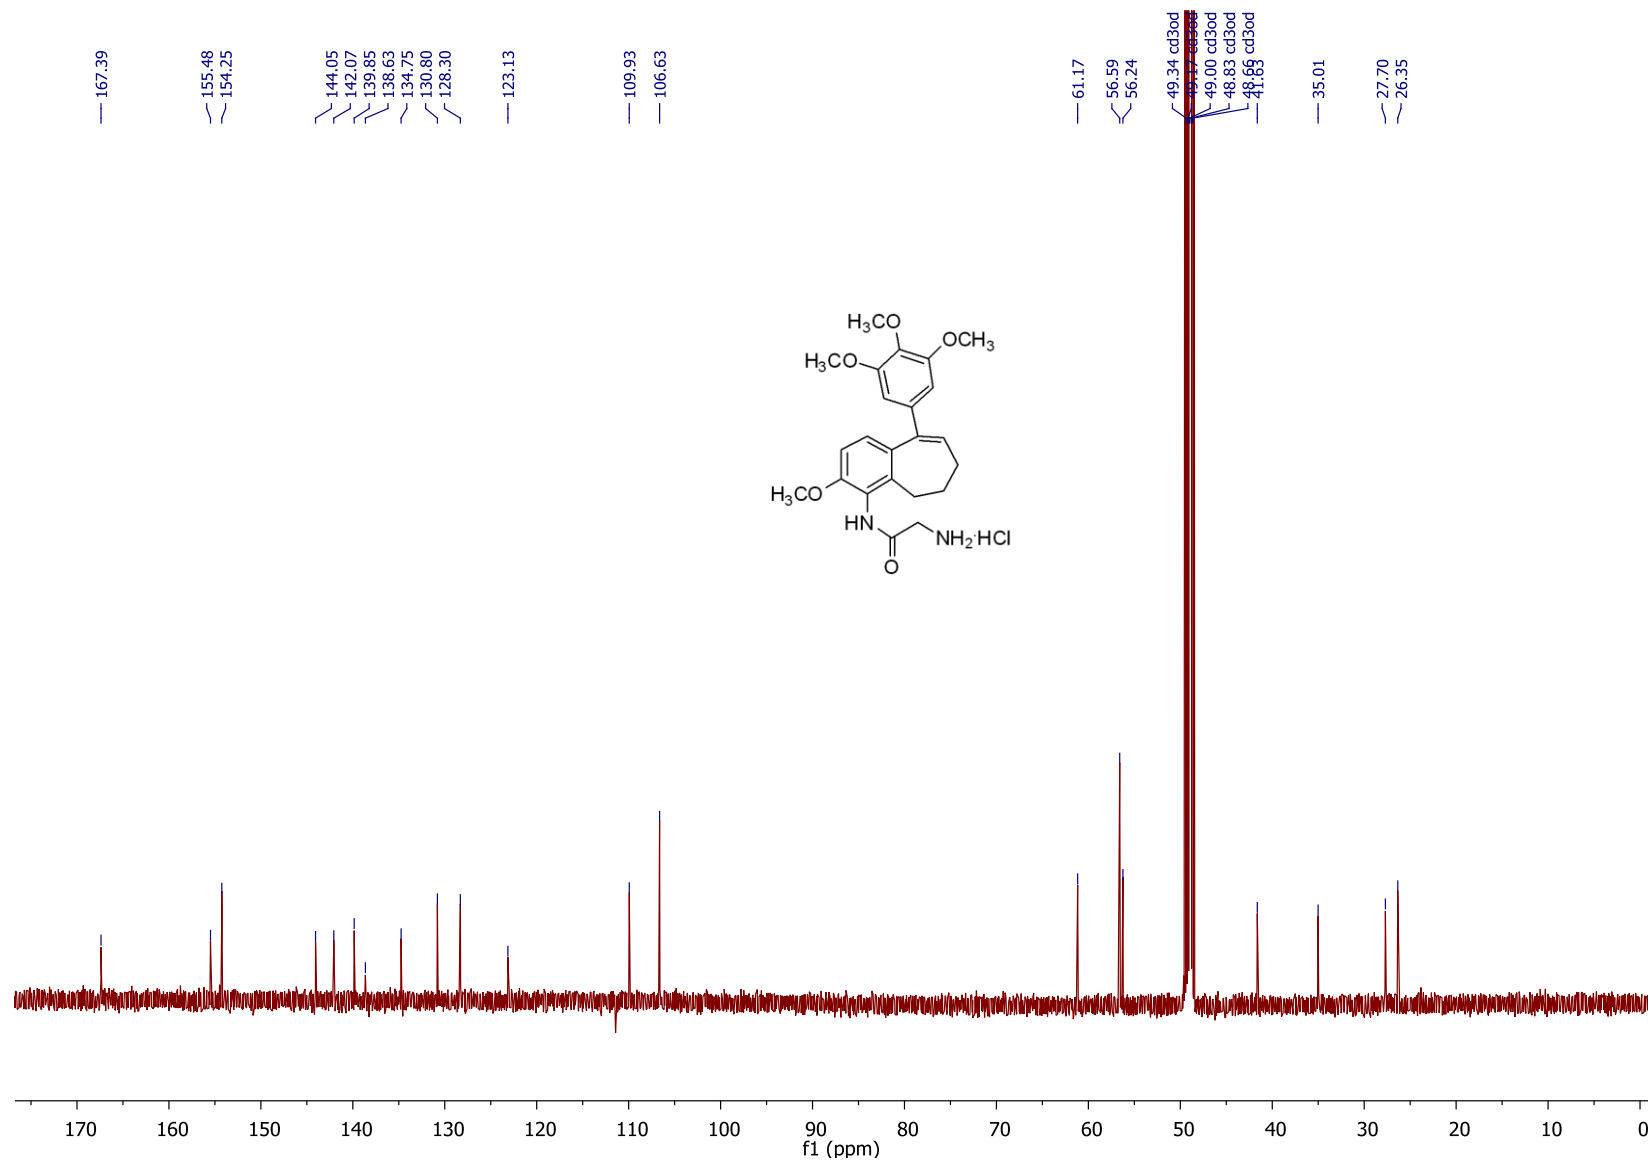

S221

# HRMS Compound 45

C:\Xcalibur\...\CML\_IL\_097\_ORBL+ESI

2/13/2013 5:40:17 PM

CML\_IL\_097

CML\_IL\_097\_ORBL+ESI #20 RT: 0.16 AV: 1 NL  
T: FTMS + p ESI Full ms [110.00-2000.00]

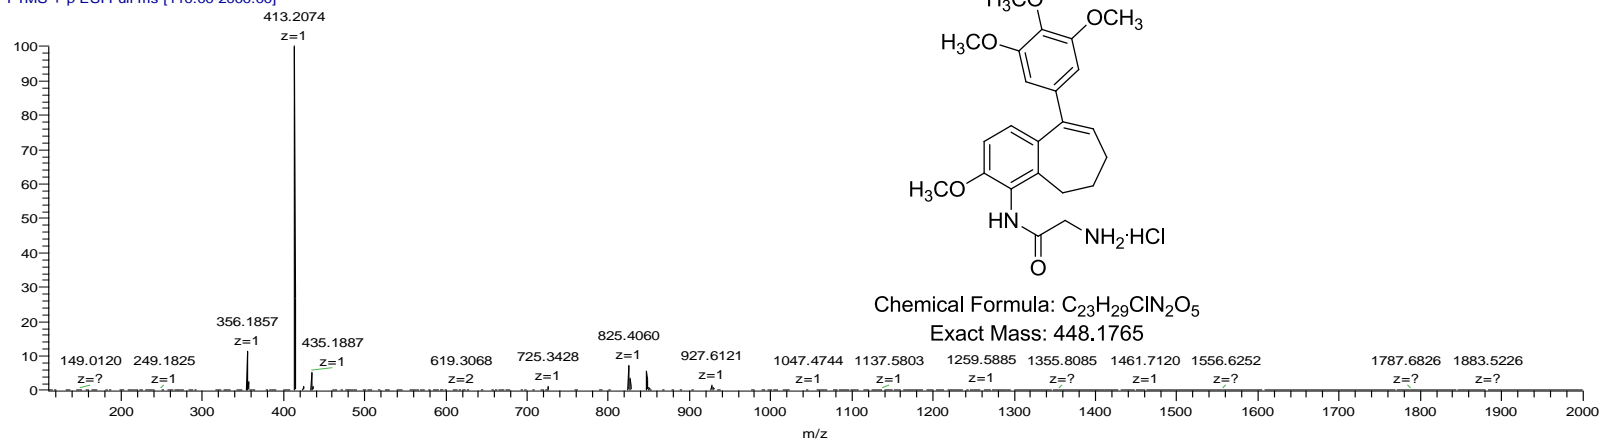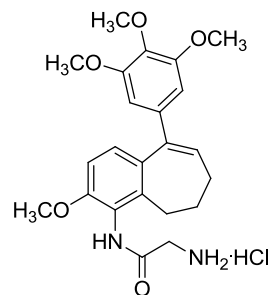

Chemical Formula: C<sub>23</sub>H<sub>29</sub>N<sub>2</sub>O<sub>5</sub>  
Exact Mass: 448.1765

cml\_il\_097\_fs\_orbl+esi #14 RT: 0.16 AV: 1 NL: 3.56E8  
T: FTMS + p ESI Full ms2 413.20@cid35.00 [110.00-2000.00]

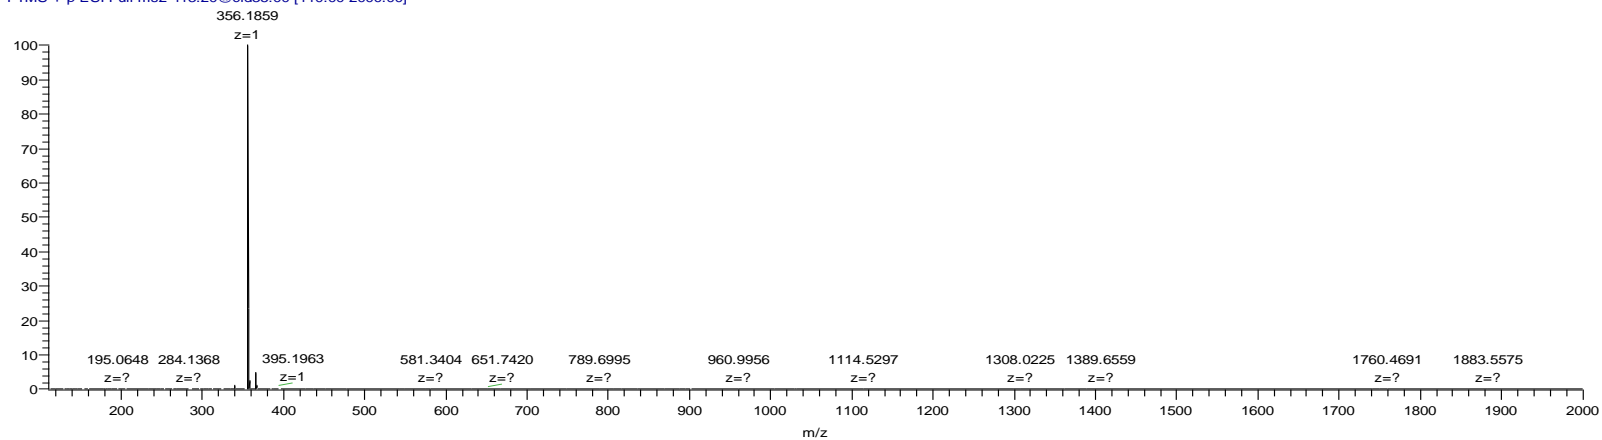

# HPLC for Compound 45

Data File C:\CHEM32\1\DATA\ERIC LIN\II-097-RUN10011.D

Sample Name: II-097-run1

```
=====
Acq. Operator   : Eric Lin
Acq. Instrument : Instrument 1                      Location  : -
Injection Date  : 2/13/2013 6:00:26 PM
Acq. Method     : C:\CHEM32\1\METHODS\MASTERMETHOD.M
Last changed    : 2/13/2013 5:46:30 PM by Eric Lin
Analysis Method : C:\CHEM32\1\DATA\ERIC LIN\II-097-RUN10011.D\DA.M (MASTERMETHOD.M)
Last changed    : 2/13/2013 6:53:22 PM by Eric Lin
```

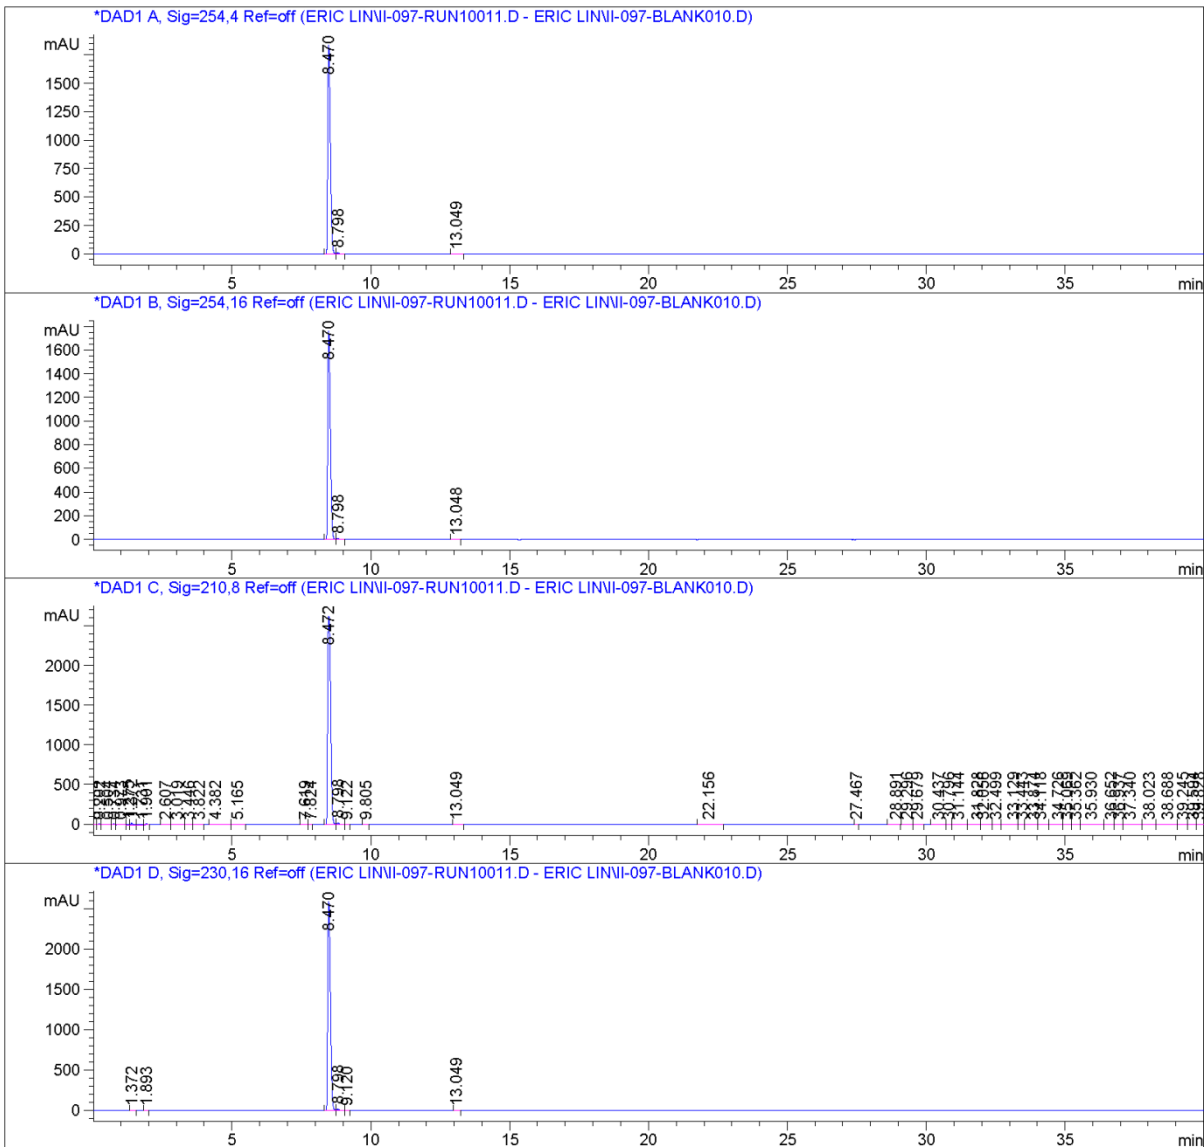

Data File C:\CHEM32\1\DATA\ERIC LIN\II-097-RUN10011.D  
Sample Name: II-097-run1

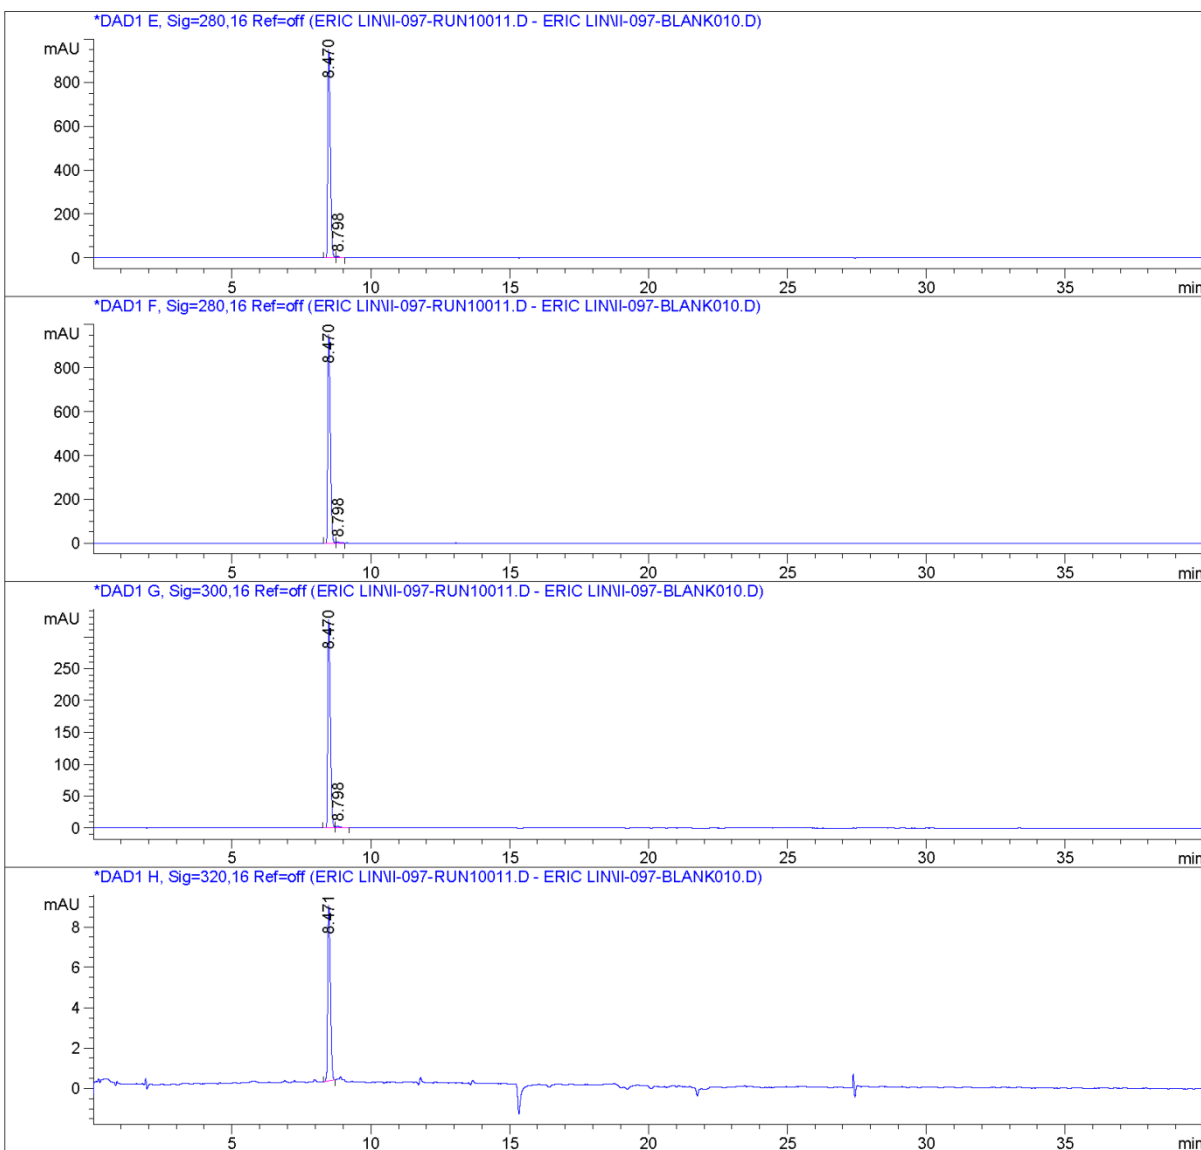

=====  
Area Percent Report  
=====

Sorted By : Signal  
Multiplier : 1.0000  
Dilution : 1.0000  
Use Multiplier & Dilution Factor with ISTDs



Data File C:\CHEM32\1\DATA\ERIC LIN\II-097-RUN10011.D  
Sample Name: II-097-run1

Signal 1: DAD1 A, Sig=254,4 Ref=off  
Signal has been modified after loading from rawdata file!

| Peak # | RetTime [min] | Type | Width [min] | Area [mAU*s] | Height [mAU] | Area %  |
|--------|---------------|------|-------------|--------------|--------------|---------|
| 1      | 8.470         | BV   | 0.1008      | 1.17827e4    | 1837.96814   | 99.4176 |
| 2      | 8.798         | VV   | 0.0826      | 62.69828     | 10.97642     | 0.5290  |
| 3      | 13.049        | BB   | 0.0837      | 6.32477      | 1.12330      | 0.0534  |

Totals : 1.18517e4 1850.06786

Signal 2: DAD1 B, Sig=254,16 Ref=off  
Signal has been modified after loading from rawdata file!

| Peak # | RetTime [min] | Type | Width [min] | Area [mAU*s] | Height [mAU] | Area %  |
|--------|---------------|------|-------------|--------------|--------------|---------|
| 1      | 8.470         | BV   | 0.1007      | 1.13146e4    | 1766.50464   | 99.4144 |
| 2      | 8.798         | VV   | 0.0832      | 60.84603     | 10.56088     | 0.5346  |
| 3      | 13.048        | BB   | 0.0822      | 5.79796      | 1.05424      | 0.0509  |

Totals : 1.13813e4 1778.11976

Signal 3: DAD1 C, Sig=210,8 Ref=off  
Signal has been modified after loading from rawdata file!

| Peak # | RetTime [min] | Type | Width [min] | Area [mAU*s] | Height [mAU] | Area %  |
|--------|---------------|------|-------------|--------------|--------------|---------|
| 1      | 0.054         | BB   | 0.0750      | 11.16905     | 2.55559      | 0.0520  |
| 2      | 0.202         | BV   | 0.0817      | 55.52967     | 9.57559      | 0.2587  |
| 3      | 0.504         | VV   | 0.2634      | 105.27843    | 5.21736      | 0.4904  |
| 4      | 0.734         | VB   | 0.0770      | 51.02904     | 9.44696      | 0.2377  |
| 5      | 0.973         | BV   | 0.2570      | 99.27760     | 5.93896      | 0.4625  |
| 6      | 1.275         | VV   | 0.1060      | 41.00343     | 5.56546      | 0.1910  |
| 7      | 1.372         | VV   | 0.0851      | 147.69992    | 23.58000     | 0.6880  |
| 8      | 1.731         | VB   | 0.1449      | 112.58514    | 9.88511      | 0.5245  |
| 9      | 1.901         | BB   | 0.0702      | 78.50723     | 16.88350     | 0.3657  |
| 10     | 2.607         | BB   | 0.1757      | 41.11032     | 3.81595      | 0.1915  |
| 11     | 3.019         | BB   | 0.1998      | 64.92876     | 4.98890      | 0.3025  |
| 12     | 3.446         | BV   | 0.1491      | 23.71148     | 2.63236      | 0.1105  |
| 13     | 3.822         | VB   | 0.1872      | 15.85303     | 1.19137      | 0.0738  |
| 14     | 4.382         | BB   | 0.3332      | 51.56498     | 2.16998      | 0.2402  |
| 15     | 5.165         | BB   | 0.2393      | 32.31220     | 2.03490      | 0.1505  |
| 16     | 7.619         | BV   | 0.1153      | 11.13670     | 1.30909      | 0.0519  |
| 17     | 7.824         | VB   | 0.0996      | 6.59859      | 1.04646      | 0.0307  |
| 18     | 8.472         | BV   | 0.1199      | 1.92972e4    | 2621.11572   | 89.8915 |

Sample Name: II-097-run1

| Peak # | RetTime [min] | Type | Width [min] | Area [mAU*s] | Height [mAU] | Area % |
|--------|---------------|------|-------------|--------------|--------------|--------|
| 19     | 8.798         | VV   | 0.0861      | 131.16293    | 21.82805     | 0.6110 |
| 20     | 9.122         | VB   | 0.0850      | 15.38597     | 2.60056      | 0.0717 |
| 21     | 9.805         | BV   | 0.1435      | 9.15189      | 1.01217      | 0.0426 |
| 22     | 13.049        | BB   | 0.0798      | 12.42094     | 2.34633      | 0.0579 |
| 23     | 22.156        | BB   | 0.3403      | 45.85422     | 1.72430      | 0.2136 |
| 24     | 27.467        | BB   | 0.0955      | 14.02170     | 2.35320      | 0.0653 |
| 25     | 28.891        | BB   | 0.2091      | 30.57117     | 2.32981      | 0.1424 |
| 26     | 29.296        | BV   | 0.2434      | 50.76952     | 3.16065      | 0.2365 |
| 27     | 29.679        | VB   | 0.1904      | 36.37481     | 2.71358      | 0.1694 |
| 28     | 30.437        | BV   | 0.3088      | 49.40651     | 2.06713      | 0.2301 |
| 29     | 30.796        | VB   | 0.1172      | 7.50973      | 1.00419      | 0.0350 |
| 30     | 31.144        | BB   | 0.2749      | 30.46164     | 1.78690      | 0.1419 |
| 31     | 31.828        | BV   | 0.2434      | 49.71067     | 2.88011      | 0.2316 |
| 32     | 32.056        | VV   | 0.2347      | 56.01570     | 3.28860      | 0.2609 |
| 33     | 32.499        | VV   | 0.1936      | 24.38632     | 1.85169      | 0.1136 |
| 34     | 33.129        | VB   | 0.2906      | 45.53355     | 2.05459      | 0.2121 |
| 35     | 33.443        | BV   | 0.1474      | 19.68425     | 2.09988      | 0.0917 |
| 36     | 33.874        | VV   | 0.2797      | 65.24351     | 3.12388      | 0.3039 |
| 37     | 34.118        | VB   | 0.1626      | 20.04897     | 1.76423      | 0.0934 |
| 38     | 34.726        | BV   | 0.2280      | 25.88588     | 1.64124      | 0.1206 |
| 39     | 35.069        | VV   | 0.1740      | 25.54245     | 2.29200      | 0.1190 |
| 40     | 35.362        | VB   | 0.1951      | 16.67540     | 1.17863      | 0.0777 |
| 41     | 35.930        | BB   | 0.3034      | 46.04016     | 1.97945      | 0.2145 |
| 42     | 36.652        | BV   | 0.2354      | 27.88365     | 1.92074      | 0.1299 |
| 43     | 36.937        | VB   | 0.1720      | 32.49429     | 2.82890      | 0.1514 |
| 44     | 37.340        | BB   | 0.3804      | 86.93623     | 3.22579      | 0.4050 |
| 45     | 38.023        | BV   | 0.2396      | 65.75677     | 4.04595      | 0.3063 |
| 46     | 38.688        | VB   | 0.3647      | 75.06680     | 2.63271      | 0.3497 |
| 47     | 39.245        | BV   | 0.2034      | 36.32860     | 2.83767      | 0.1692 |
| 48     | 39.594        | VV   | 0.2061      | 39.79980     | 2.86473      | 0.1854 |
| 49     | 39.828        | VBA  | 0.1623      | 28.59319     | 2.77197      | 0.1332 |

Totals : 2.14672e4 2821.16288

Signal 4: DAD1 D, Sig=230,16 Ref=off

Signal has been modified after loading from rawdata file!

| Peak # | RetTime [min] | Type | Width [min] | Area [mAU*s] | Height [mAU] | Area %  |
|--------|---------------|------|-------------|--------------|--------------|---------|
| 1      | 1.372         | BB   | 0.0580      | 10.34708     | 2.62183      | 0.0596  |
| 2      | 1.893         | BB   | 0.0638      | 10.50224     | 2.56492      | 0.0605  |
| 3      | 8.470         | BV   | 0.1075      | 1.72373e4    | 2593.79321   | 99.2714 |
| 4      | 8.798         | VV   | 0.0849      | 92.27396     | 15.63470     | 0.5314  |
| 5      | 9.120         | VB   | 0.0763      | 7.66288      | 1.48331      | 0.0441  |
| 6      | 13.049        | BB   | 0.0763      | 5.72853      | 1.14636      | 0.0330  |

Totals : 1.73638e4 2617.24433

Signal 5: DAD1 E, Sig=280,16 Ref=off  
Signal has been modified after loading from rawdata file!

| Peak # | RetTime [min] | Type | Width [min] | Area [mAU*s] | Height [mAU] | Area %  |
|--------|---------------|------|-------------|--------------|--------------|---------|
| 1      | 8.470         | BV   | 0.1006      | 6110.43115   | 955.03564    | 99.2556 |
| 2      | 8.798         | VV   | 0.0974      | 45.82551     | 6.57189      | 0.7444  |

Totals :                   6156.25666   961.60754

Signal 6: DAD1 F, Sig=280,16 Ref=off  
Signal has been modified after loading from rawdata file!

| Peak # | RetTime [min] | Type | Width [min] | Area [mAU*s] | Height [mAU] | Area %  |
|--------|---------------|------|-------------|--------------|--------------|---------|
| 1      | 8.470         | BV   | 0.1006      | 6110.43115   | 955.03564    | 99.2556 |
| 2      | 8.798         | VV   | 0.0974      | 45.82551     | 6.57189      | 0.7444  |

Totals :                   6156.25666   961.60754

Signal 7: DAD1 G, Sig=300,16 Ref=off  
Signal has been modified after loading from rawdata file!

| Peak # | RetTime [min] | Type | Width [min] | Area [mAU*s] | Height [mAU] | Area %  |
|--------|---------------|------|-------------|--------------|--------------|---------|
| 1      | 8.470         | BV   | 0.1009      | 2099.83813   | 326.97824    | 98.7479 |
| 2      | 8.798         | VB   | 0.1206      | 26.62493     | 2.97049      | 1.2521  |

Totals :                   2126.46306   329.94873

Signal 8: DAD1 H, Sig=320,16 Ref=off  
Signal has been modified after loading from rawdata file!

| Peak # | RetTime [min] | Type | Width [min] | Area [mAU*s] | Height [mAU] | Area %   |
|--------|---------------|------|-------------|--------------|--------------|----------|
| 1      | 8.471         | BB   | 0.1060      | 58.33273     | 8.73021      | 100.0000 |

Totals :                   58.33273       8.73021

=====

<sup>1</sup>H NMR (CDCl<sub>3</sub>, 600 MHz) Compound **46**

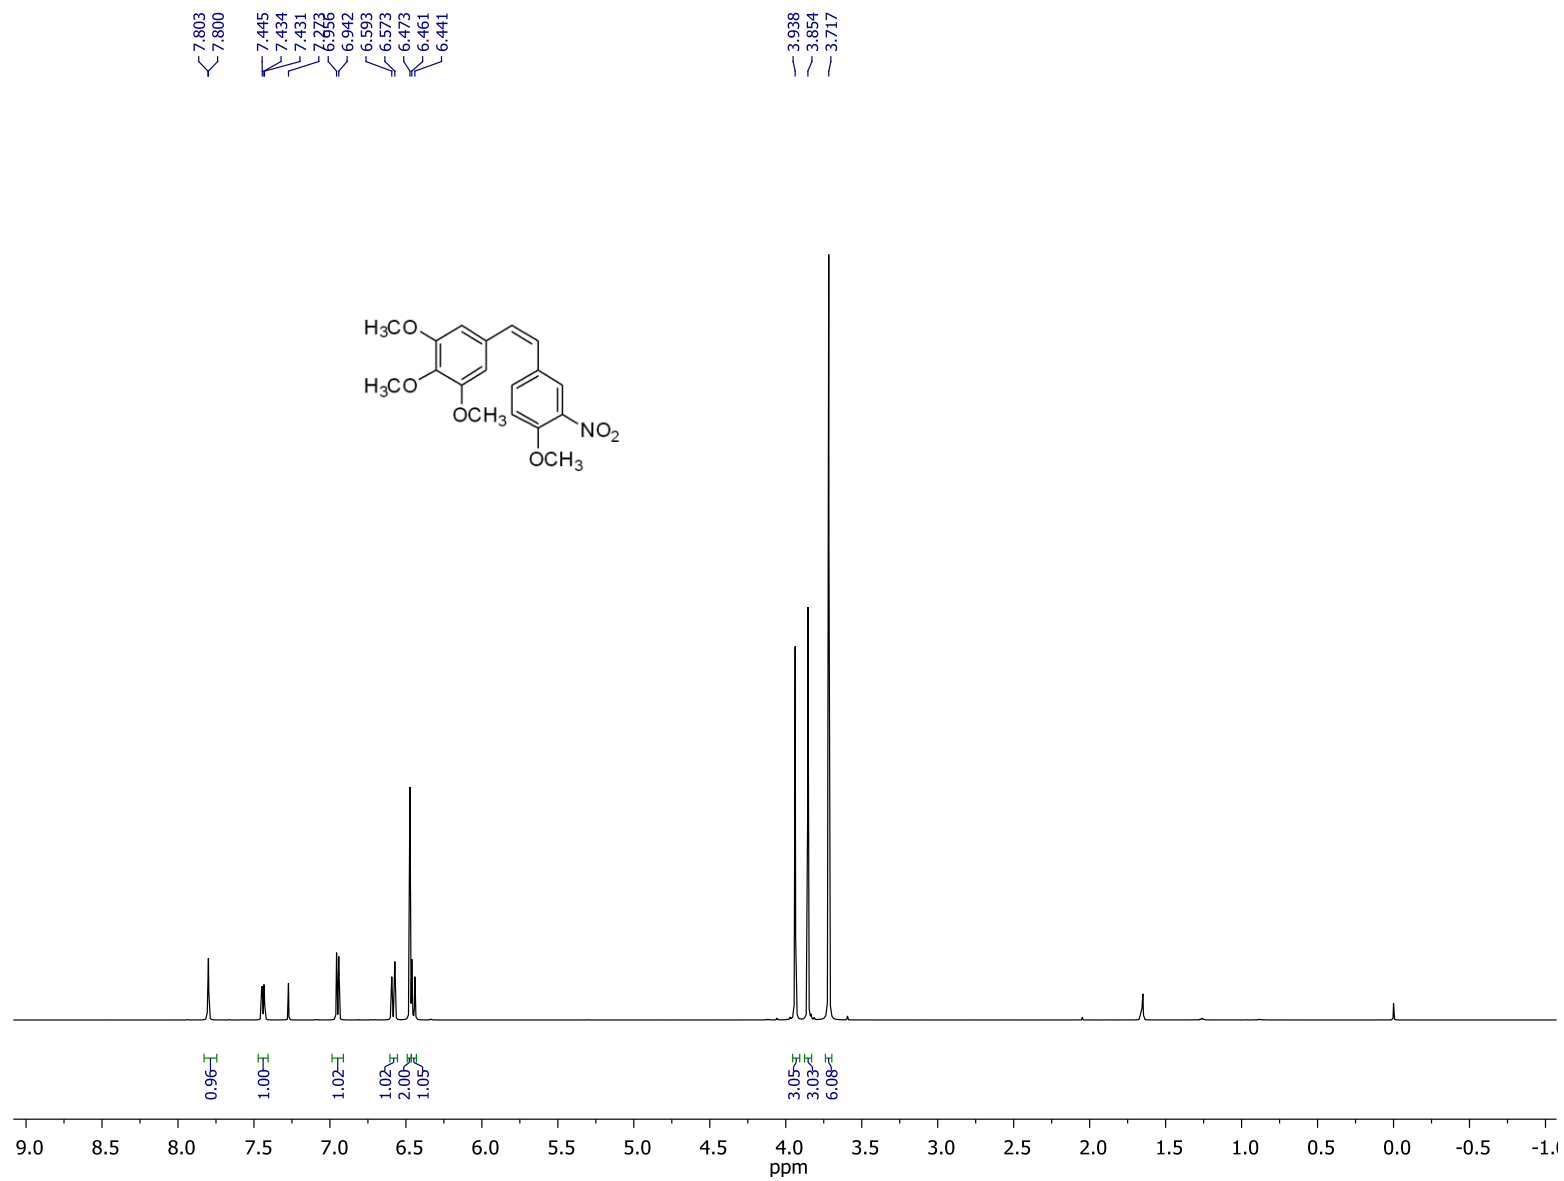

S228

<sup>13</sup>C NMR (CDCl<sub>3</sub>, 150 MHz) Compound **46**

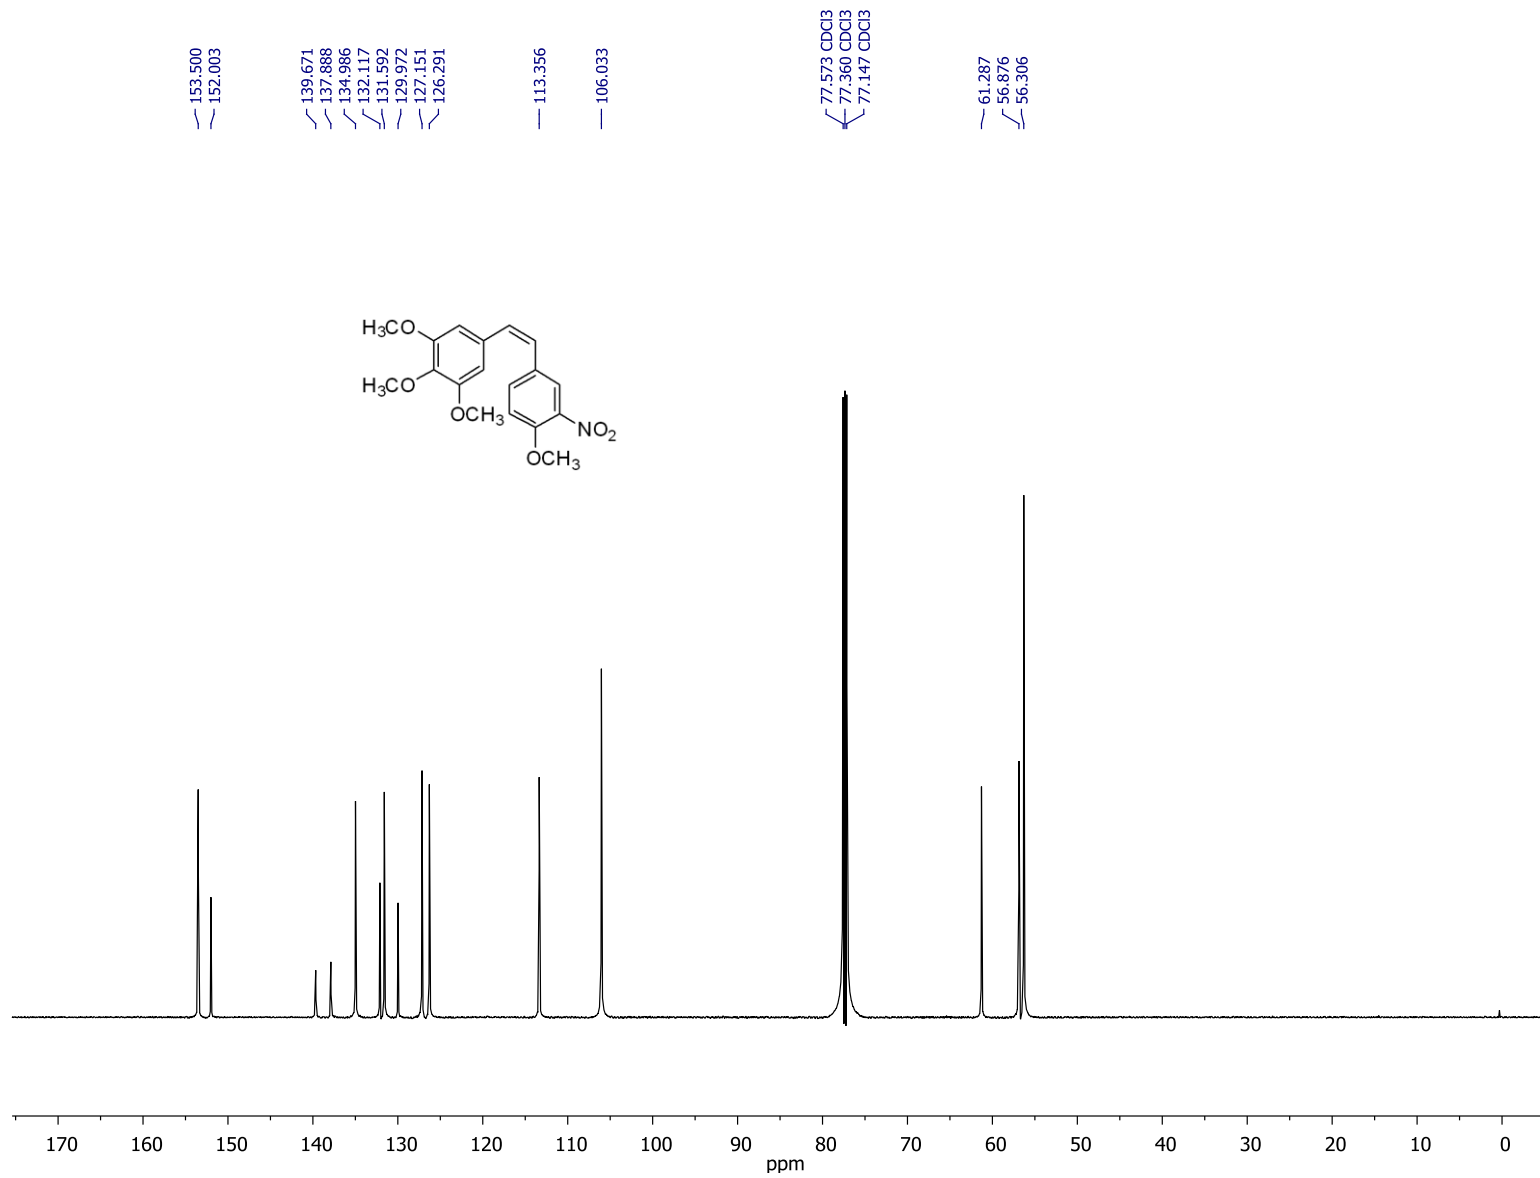

<sup>1</sup>H NMR (CDCl<sub>3</sub>, 600 MHz) for 3' CA4-amine

LD-Vii-69-f4

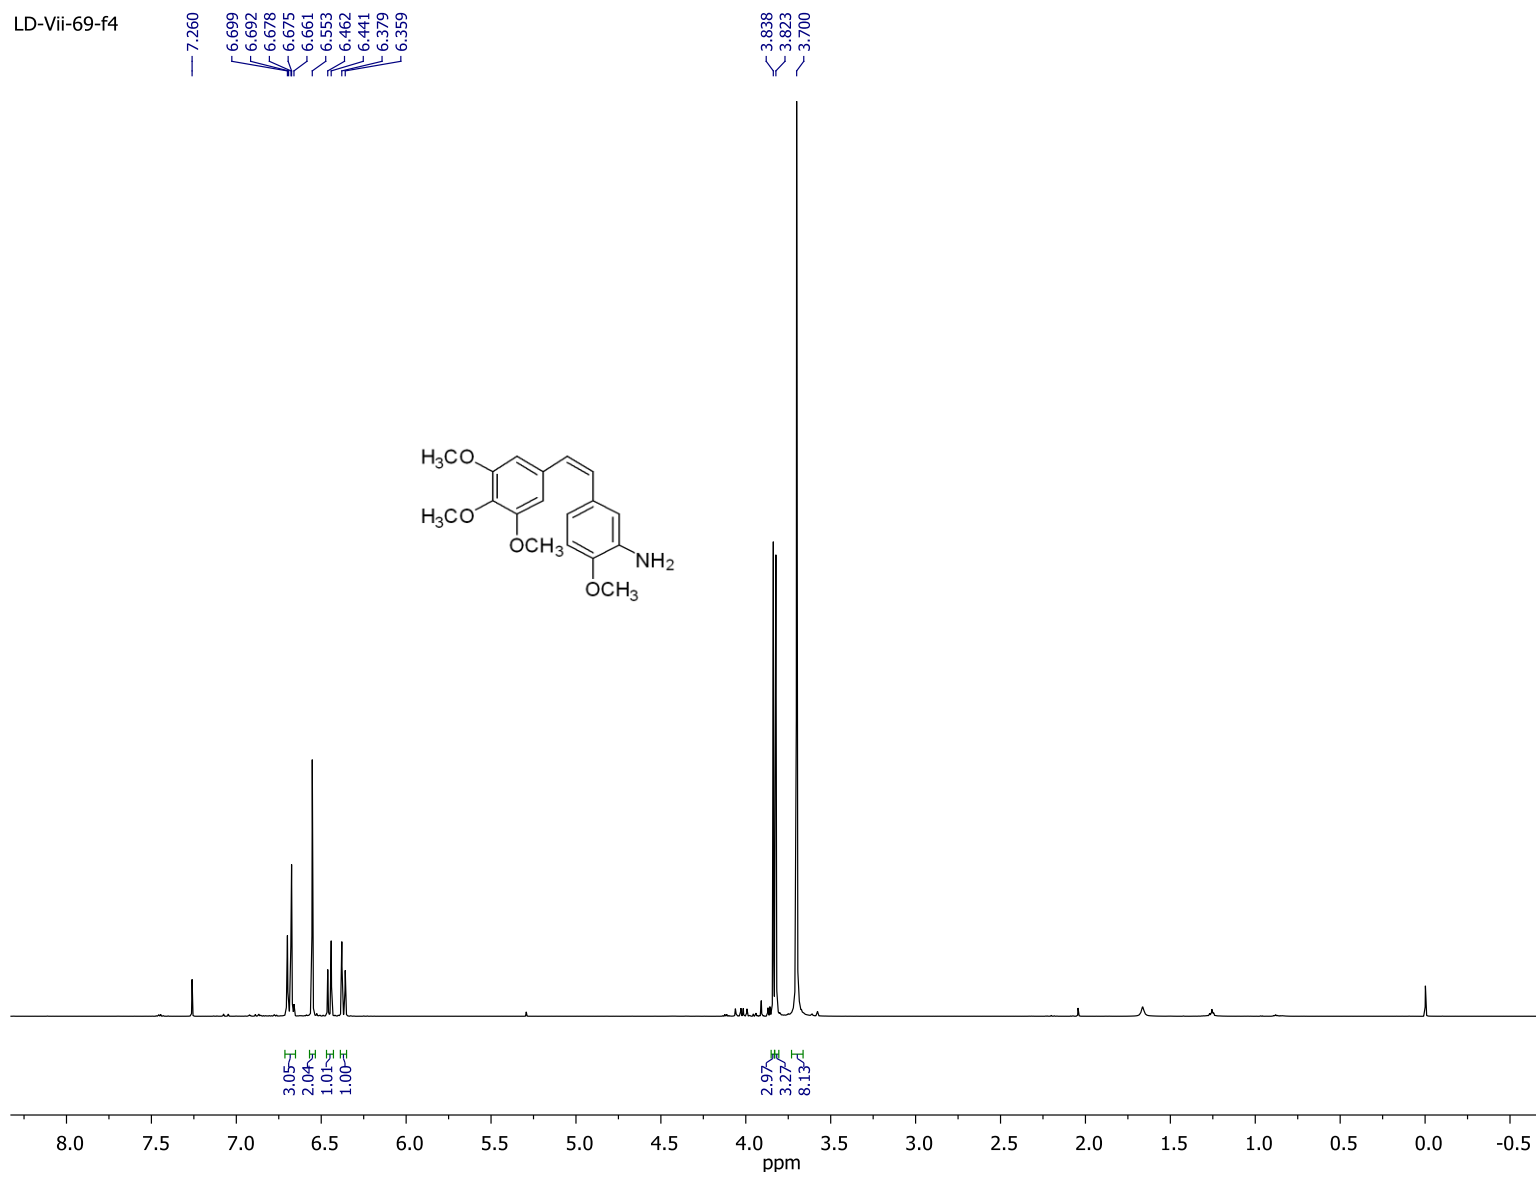

S230

<sup>13</sup>C NMR (CDCl<sub>3</sub>, 150 MHz) for 3' CA4-amine

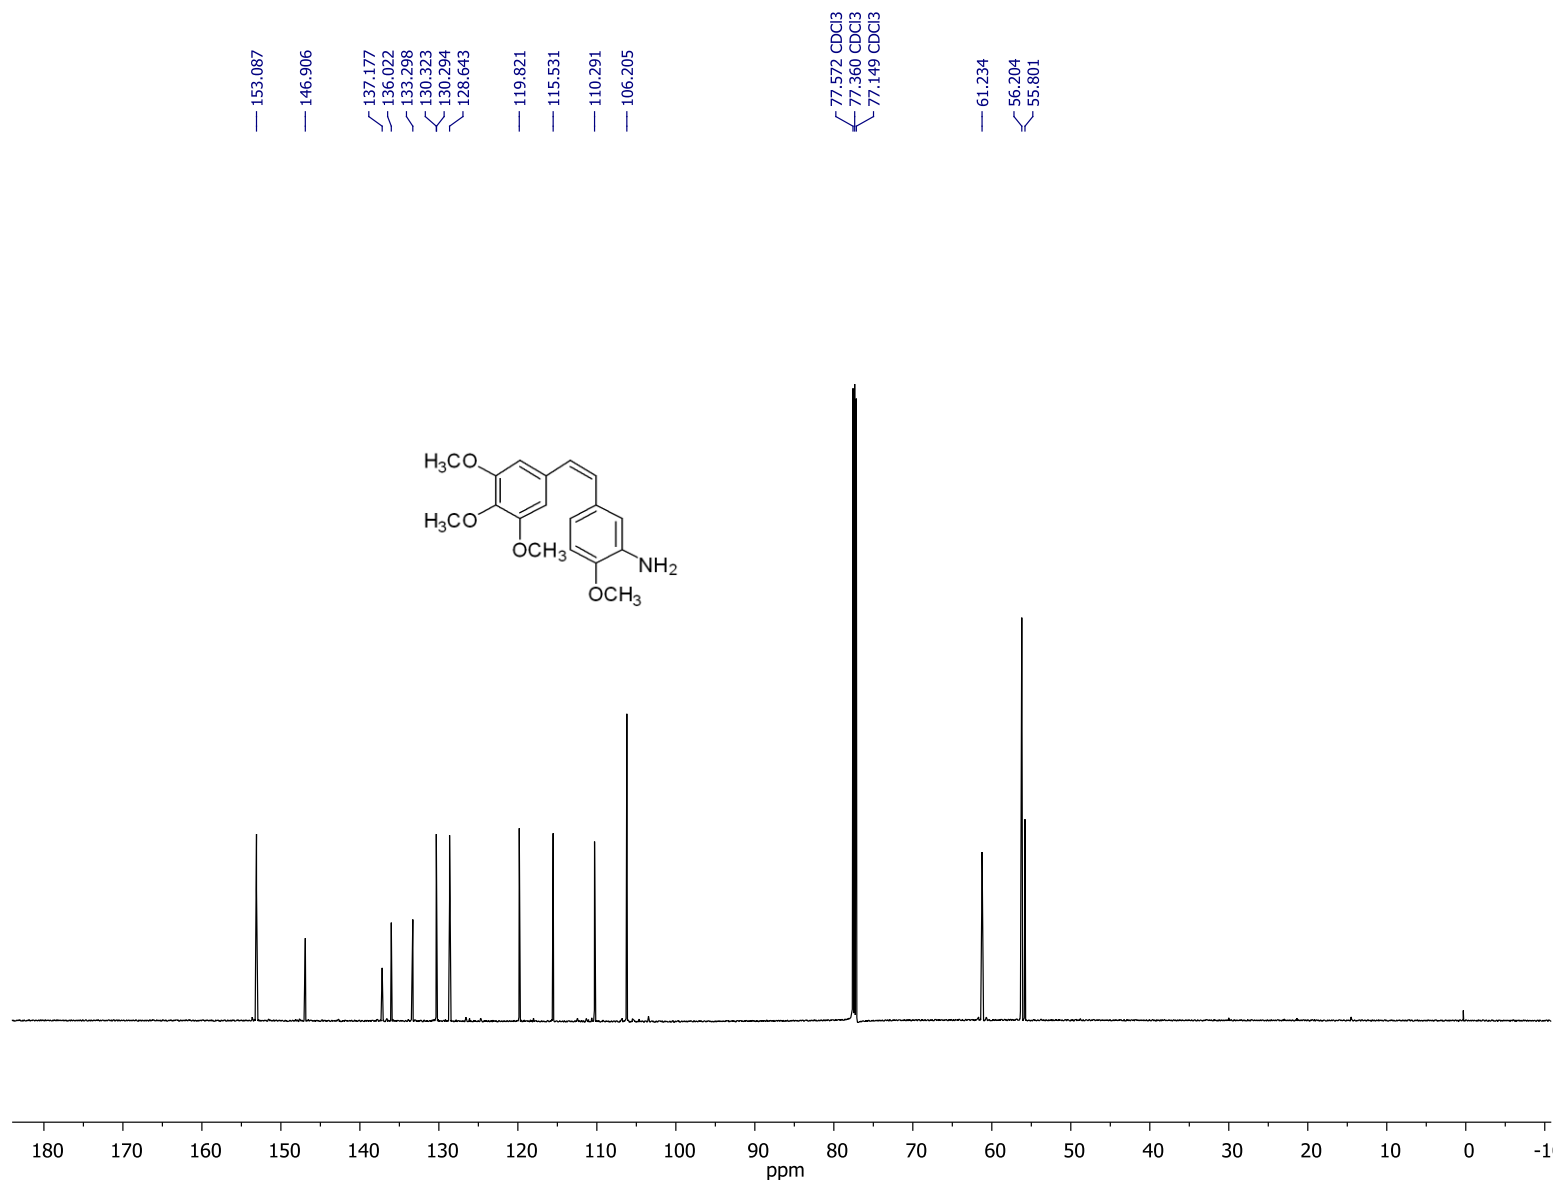

S231

# HRMS for 3' CA4-amine

C:\Xcalibur\...0602\LD-VII-69\_Orbi\_+ESI

6/2/2015 5:05:33 PM

LD-VII-69

LD-VII-69\_Orbi\_+ESI #1 RT: 0.00 AV: 1 NL: 3  
T: FTMS + p ESI Full ms [100.00-1000.00]

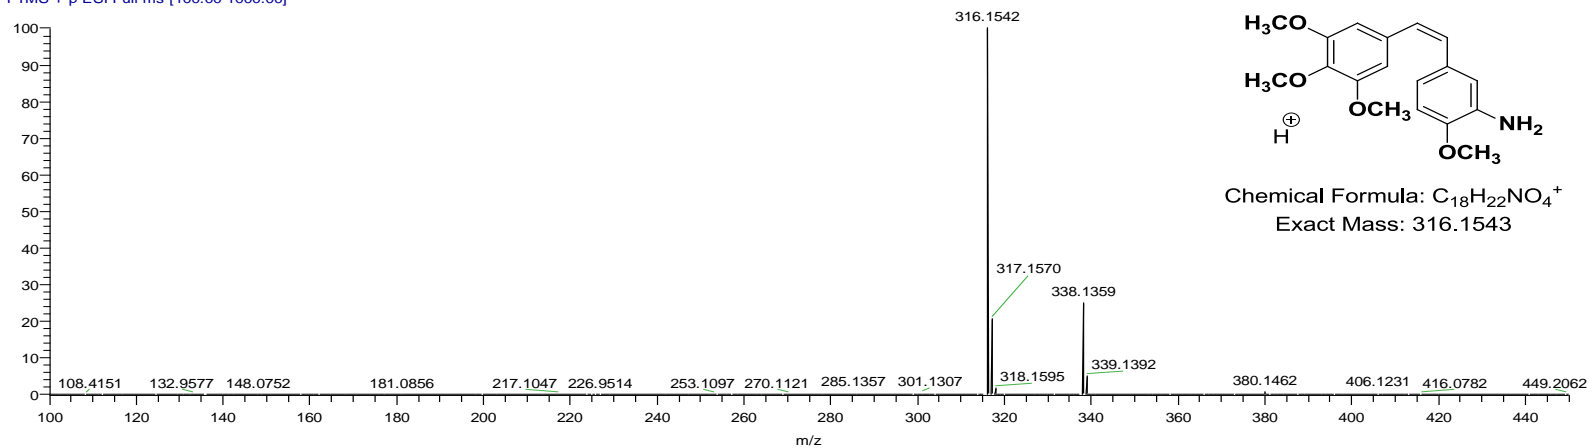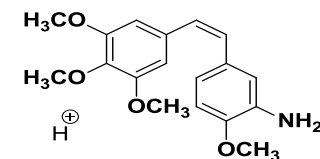

Chemical Formula:  $C_{18}H_{22}NO_4^+$   
Exact Mass: 316.1543

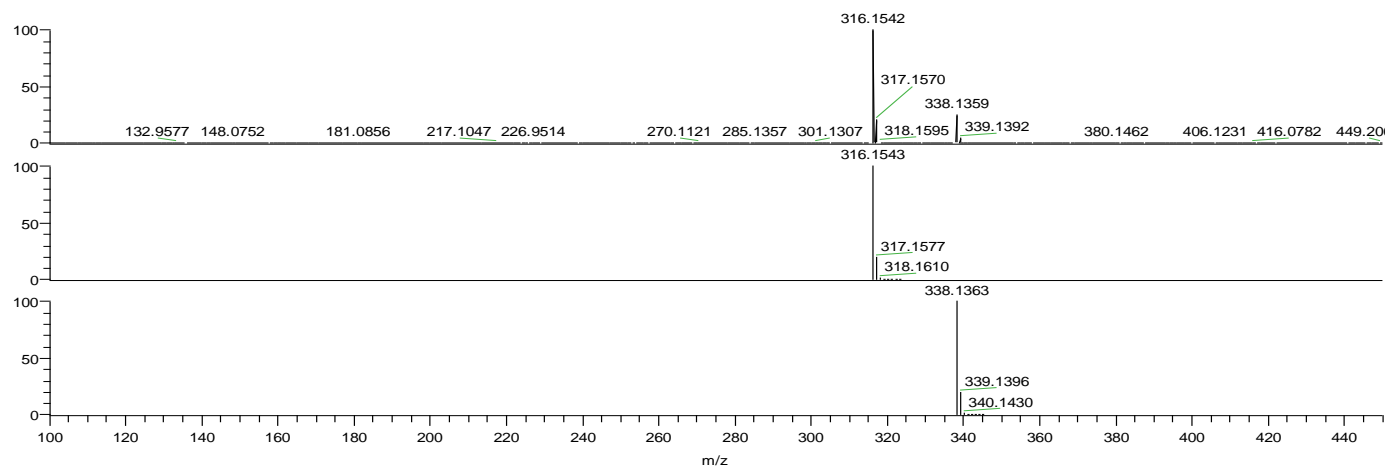

NL:  
3.00E8  
LD-VII-69\_Orbi\_+ESI#1  
RT: 0.00 AV: 1 T: FTMS  
+ p ESI Full ms  
[100.00-1000.00]

NL:  
8.11E5  
 $C_{18}H_{21}NO_4 + H^+$   
 $C_{18}H_{22}N_1O_4$   
pa Chrg 1

NL:  
8.11E5  
 $C_{18}H_{21}NO_4 + Na^+$   
 $C_{18}H_{21}N_1O_4 Na_1$   
pa Chrg 1



# HPLC for 3' CA4-amine

Data File C:\CHEM32\1\DATA\LAXMAN\LD-VII-69-00001.D

Sample Name: LD-VII-69-1 3'CA4-Amine

=====  
Acq. Operator : Laxman  
Acq. Instrument : Instrument 1 Location : -  
Injection Date : 6/1/2015 2:33:28 PM  
Acq. Method : C:\CHEM32\1\METHODS\MASTERMETHOD2.M  
Last changed : 6/1/2015 2:13:25 PM by Eric Lin  
Analysis Method : C:\CHEM32\1\DATA\LAXMAN\LD-VII-69-00001.D\DA.M (MASTERMETHOD2.M)  
Last changed : 6/1/2015 3:22:30 PM by Eric Lin  
Sample Info : Method-Mastermethod2

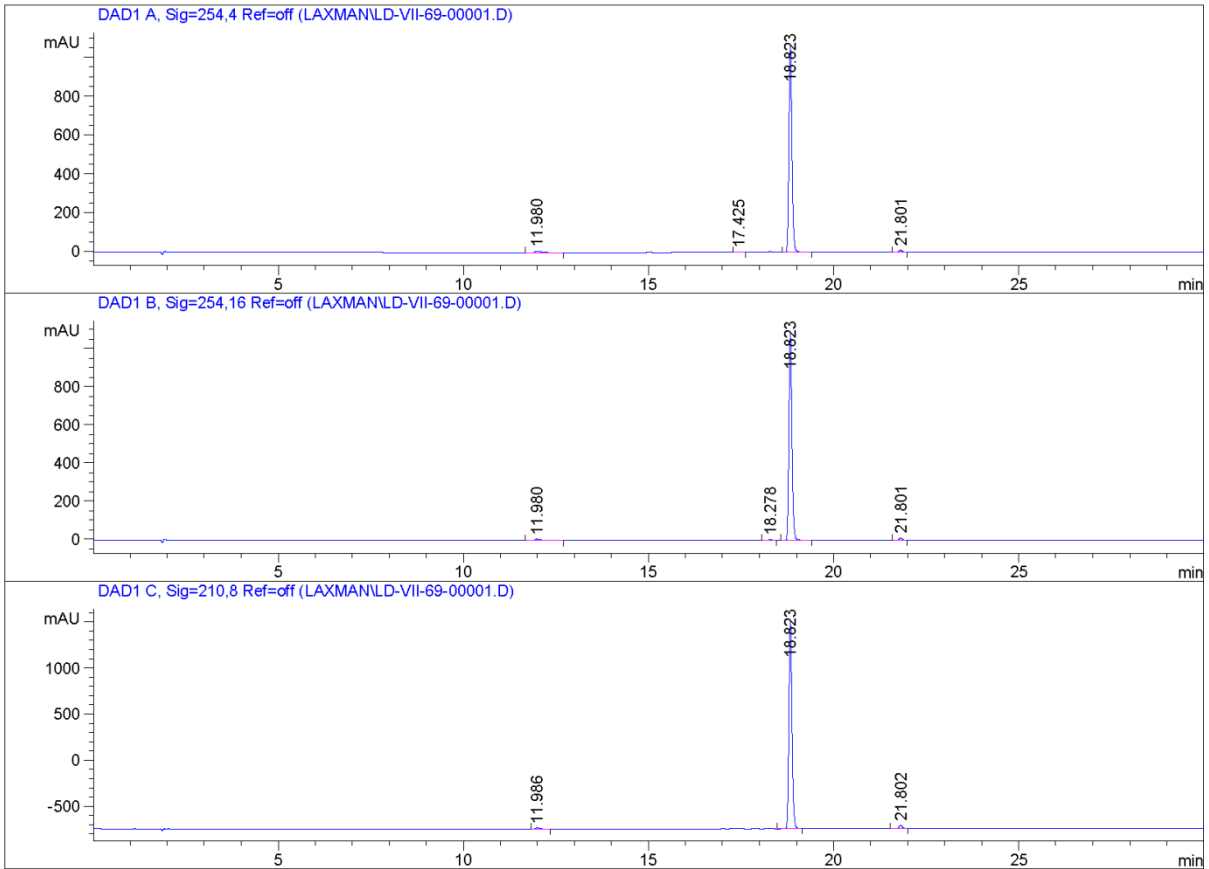

Data File C:\CHEM32\1\DATA\LAXMAN\LD-VII-69-00001.D  
Sample Name: LD-VII-69-1 3'CA4-Amine

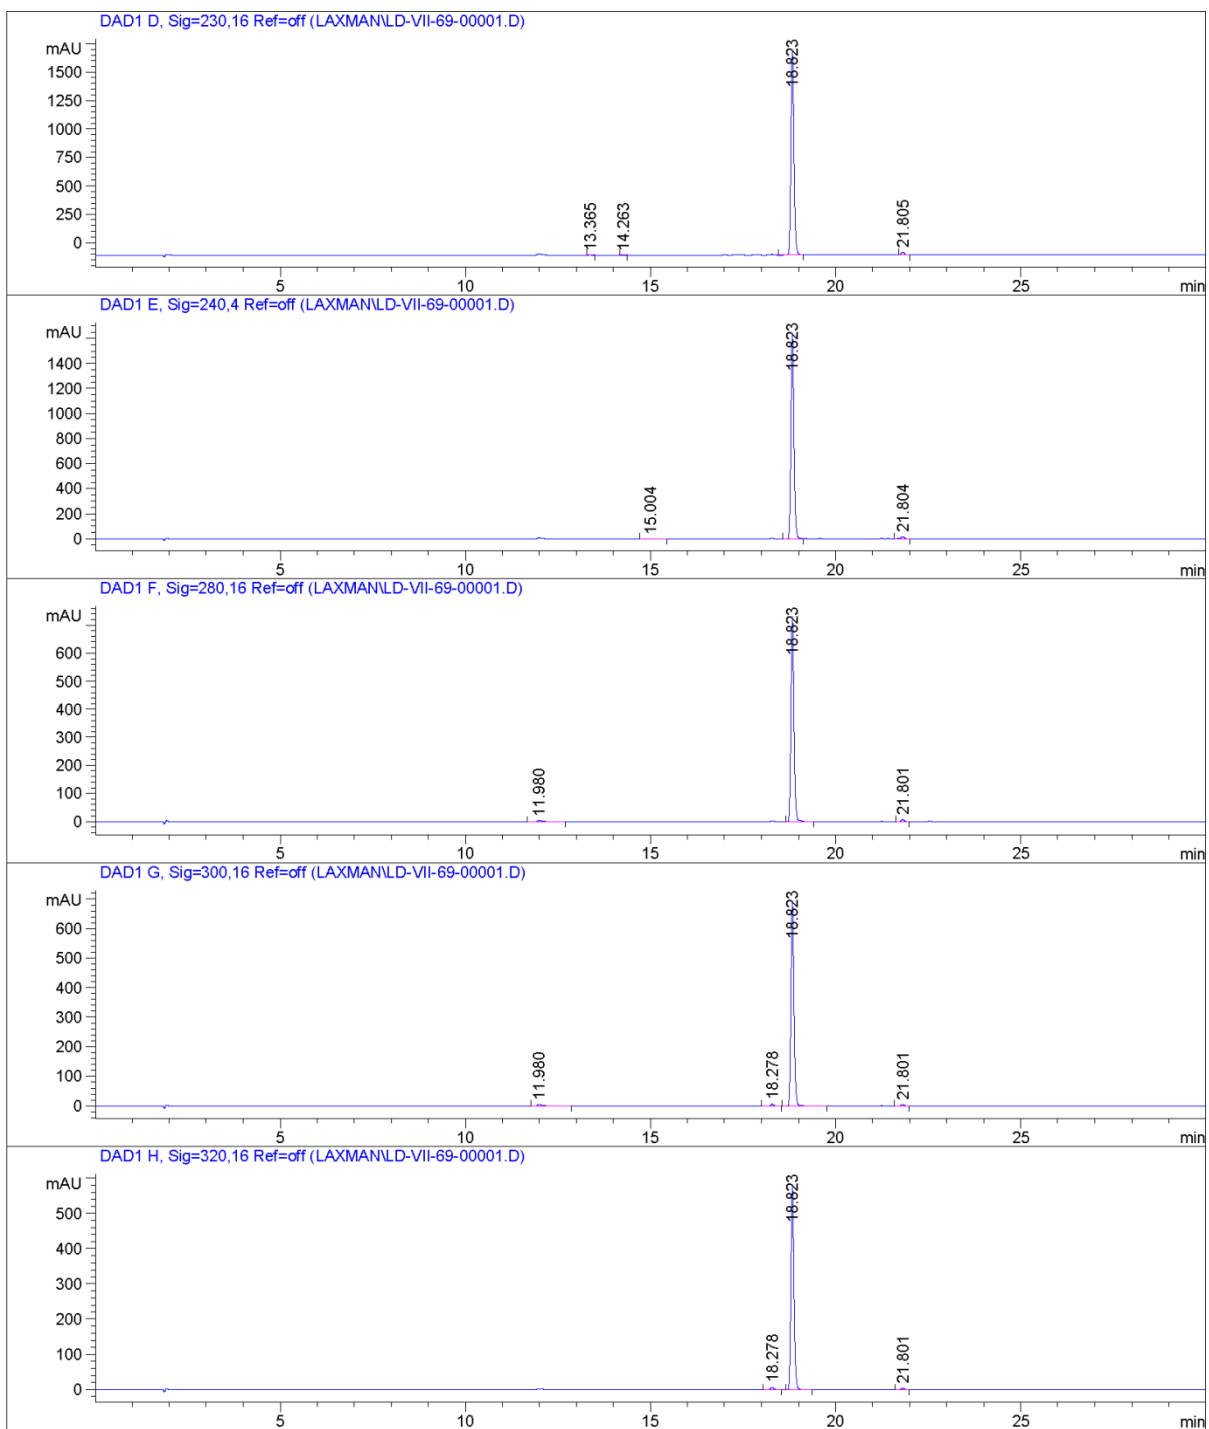

=====  
Area Percent Report  
=====

Sorted By : Signal  
Multiplier : 1.0000  
Dilution : 1.0000  
Use Multiplier & Dilution Factor with ISTDs

Signal 1: DAD1 A, Sig=254,4 Ref=off

| Peak # | RetTime [min] | Type | Width [min] | Area [mAU*s] | Height [mAU] | Area %  |
|--------|---------------|------|-------------|--------------|--------------|---------|
| 1      | 11.980        | BB   | 0.1751      | 89.59236     | 7.62506      | 1.4503  |
| 2      | 17.425        | BB   | 0.0961      | 10.77919     | 1.65243      | 0.1745  |
| 3      | 18.823        | BB   | 0.0851      | 6008.21289   | 1077.08765   | 97.2588 |
| 4      | 21.801        | BB   | 0.0943      | 68.96559     | 11.13570     | 1.1164  |

Totals : 6177.55003 1097.50084

Signal 2: DAD1 B, Sig=254,16 Ref=off

| Peak # | RetTime [min] | Type | Width [min] | Area [mAU*s] | Height [mAU] | Area %  |
|--------|---------------|------|-------------|--------------|--------------|---------|
| 1      | 11.980        | BB   | 0.1756      | 89.20059     | 7.56309      | 1.4138  |
| 2      | 18.278        | BB   | 0.0868      | 26.60785     | 4.64551      | 0.4217  |
| 3      | 18.823        | BB   | 0.0851      | 6123.01221   | 1097.30920   | 97.0493 |
| 4      | 21.801        | BB   | 0.0947      | 70.35337     | 11.29626     | 1.1151  |

Totals : 6309.17402 1120.81407

Signal 3: DAD1 C, Sig=210,8 Ref=off

| Peak # | RetTime [min] | Type | Width [min] | Area [mAU*s] | Height [mAU] | Area %  |
|--------|---------------|------|-------------|--------------|--------------|---------|
| 1      | 11.986        | BB   | 0.1510      | 134.73405    | 13.20541     | 1.0140  |
| 2      | 18.823        | BV   | 0.0883      | 1.29139e4    | 2273.72705   | 97.1937 |
| 3      | 21.802        | VB   | 0.0974      | 238.12749    | 36.85693     | 1.7922  |

Totals : 1.32868e4 2323.78940

Data File C:\CHEM32\1\DATA\LAXMAN\LD-VII-69-00001.D  
Sample Name: LD-VII-69-1 3'CA4-Amine

Signal 4: DAD1 D, Sig=230,16 Ref=off

| Peak # | RetTime [min] | Type | Width [min] | Area [mAU*s] | Height [mAU] | Area %  |
|--------|---------------|------|-------------|--------------|--------------|---------|
| 1      | 13.365        | BB   | 0.0656      | 9.52854      | 2.24285      | 0.0928  |
| 2      | 14.263        | BB   | 0.0820      | 5.22144      | 1.01602      | 0.0508  |
| 3      | 18.823        | BV   | 0.0872      | 1.01168e4    | 1810.49146   | 98.5021 |
| 4      | 21.805        | VB   | 0.0987      | 139.09056    | 21.72524     | 1.3543  |

Totals : 1.02707e4 1835.47557

Signal 5: DAD1 E, Sig=240,4 Ref=off

| Peak # | RetTime [min] | Type | Width [min] | Area [mAU*s] | Height [mAU] | Area %  |
|--------|---------------|------|-------------|--------------|--------------|---------|
| 1      | 15.004        | BB   | 0.1330      | 14.18810     | 1.51891      | 0.1524  |
| 2      | 18.823        | BV   | 0.0870      | 9179.72461   | 1646.90674   | 98.5840 |
| 3      | 21.804        | VB   | 0.1042      | 117.66814    | 17.11329     | 1.2637  |

Totals : 9311.58084 1665.53893

Signal 6: DAD1 F, Sig=280,16 Ref=off

| Peak # | RetTime [min] | Type | Width [min] | Area [mAU*s] | Height [mAU] | Area %  |
|--------|---------------|------|-------------|--------------|--------------|---------|
| 1      | 11.980        | BB   | 0.1822      | 64.04824     | 4.97383      | 1.5266  |
| 2      | 18.823        | BB   | 0.0852      | 4088.56470   | 731.74805    | 97.4517 |
| 3      | 21.801        | BB   | 0.0907      | 42.86423     | 7.27667      | 1.0217  |

Totals : 4195.47717 743.99854

Signal 7: DAD1 G, Sig=300,16 Ref=off

| Peak # | RetTime [min] | Type | Width [min] | Area [mAU*s] | Height [mAU] | Area %  |
|--------|---------------|------|-------------|--------------|--------------|---------|
| 1      | 11.980        | BB   | 0.1797      | 62.46052     | 5.14319      | 1.5541  |
| 2      | 18.278        | BB   | 0.0856      | 34.96275     | 6.22234      | 0.8699  |
| 3      | 18.823        | BB   | 0.0852      | 3891.12744   | 695.78998    | 96.8142 |
| 4      | 21.801        | BB   | 0.0907      | 30.62026     | 5.19646      | 0.7619  |

Totals : 4019.17097 712.35197

Data File C:\CHEM32\1\DATA\LAXMAN\LD-VII-69-00001.D  
Sample Name: LD-VII-69-1 3'CA4-Amine

Signal 8: DAD1 H, Sig=320,16 Ref=off

| Peak # | RetTime [min] | Type | Width [min] | Area [mAU*s] | Height [mAU] | Area %  |
|--------|---------------|------|-------------|--------------|--------------|---------|
| 1      | 18.278        | BB   | 0.0849      | 42.04350     | 7.55673      | 1.2647  |
| 2      | 18.823        | BB   | 0.0851      | 3256.91406   | 583.29913    | 97.9669 |
| 3      | 21.801        | BB   | 0.0909      | 25.54603     | 4.32569      | 0.7684  |

Totals :                    3324.50358  595.18155

=====  
\*\*\* End of Report \*\*\*

<sup>1</sup>H NMR (CDCl<sub>3</sub>, 600 MHz) Compound 47

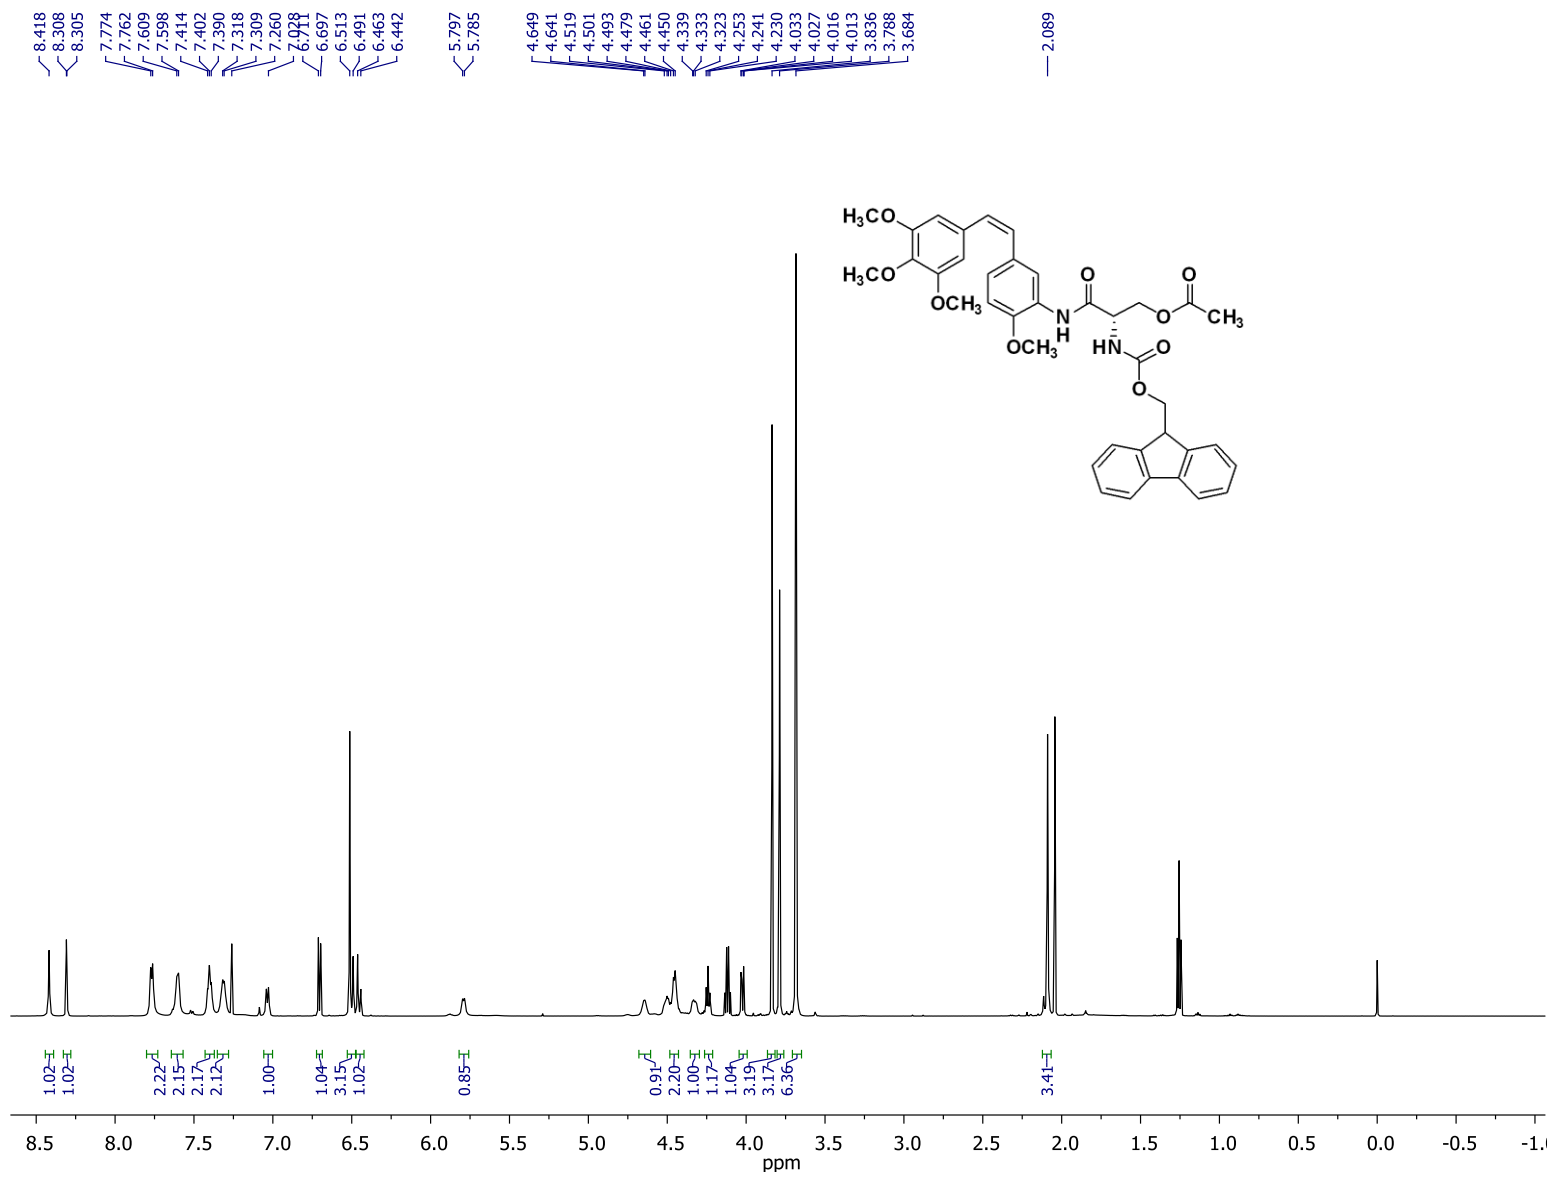

S238

<sup>13</sup>C NMR (CDCl<sub>3</sub>, 150 MHz) Compound **47**

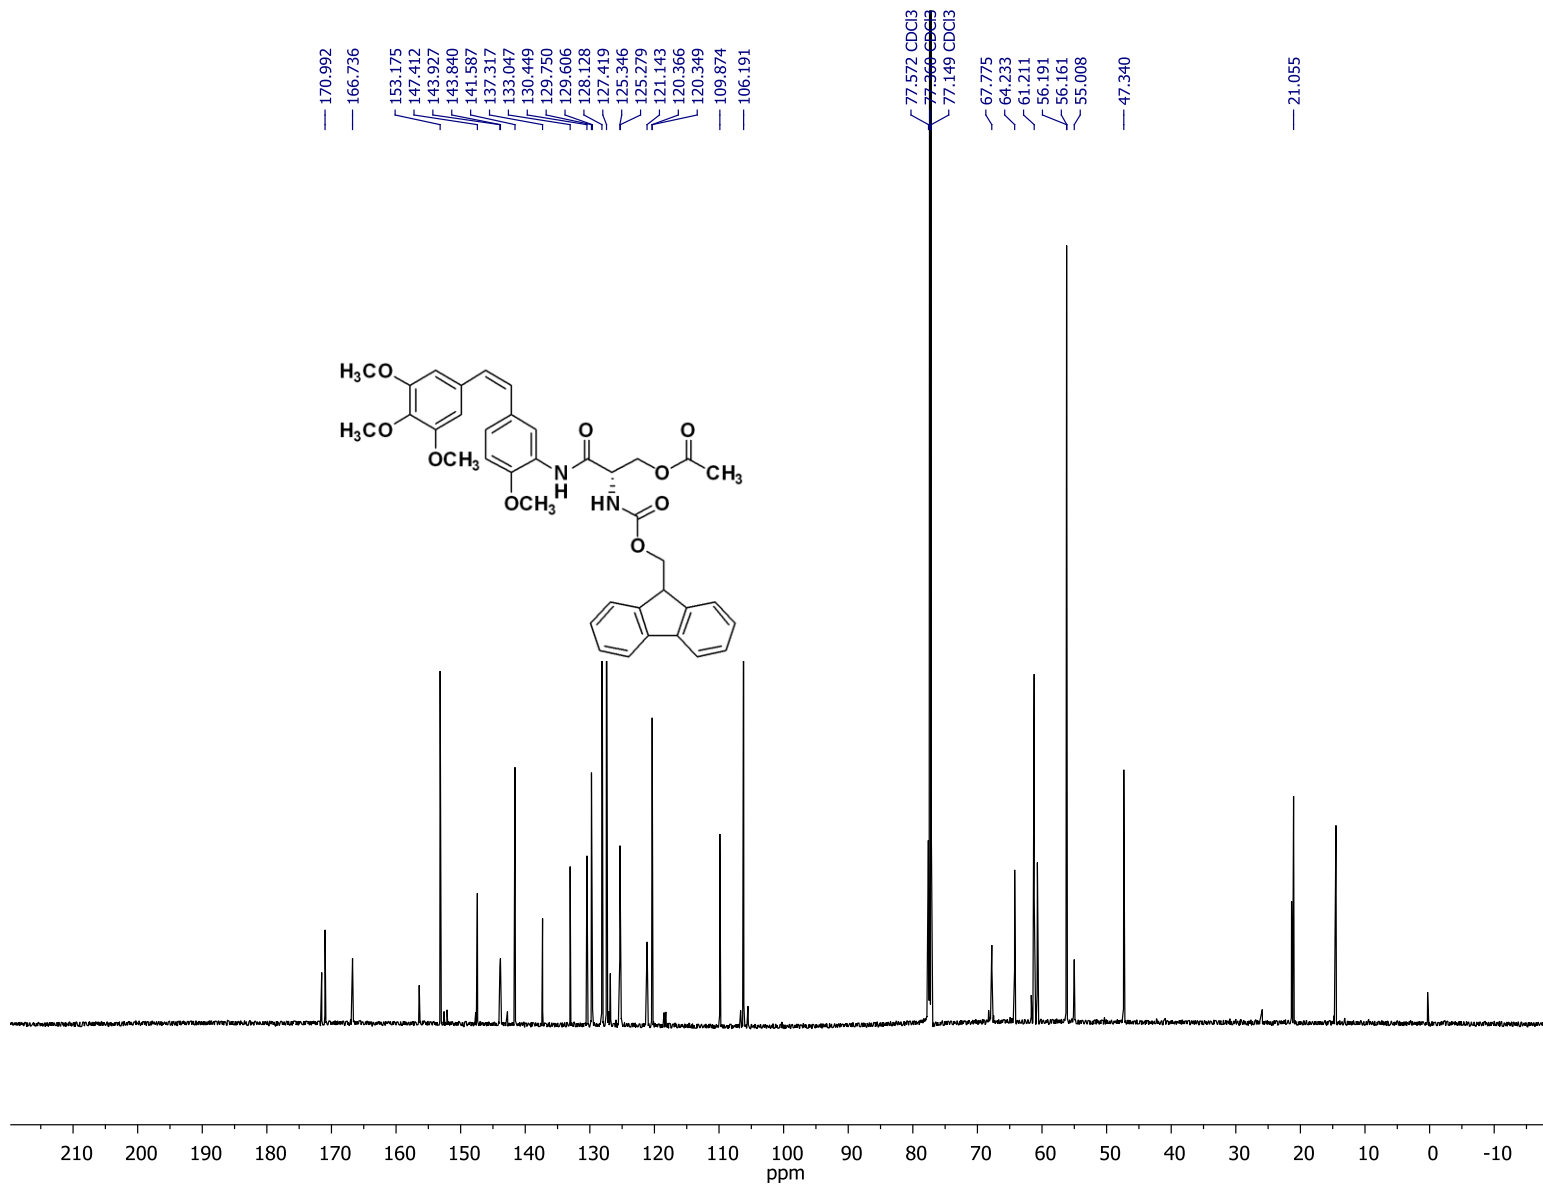

S239

<sup>1</sup>H NMR (CD<sub>3</sub>OD, 600 MHz) for 3' CA4-*L*-serinamide

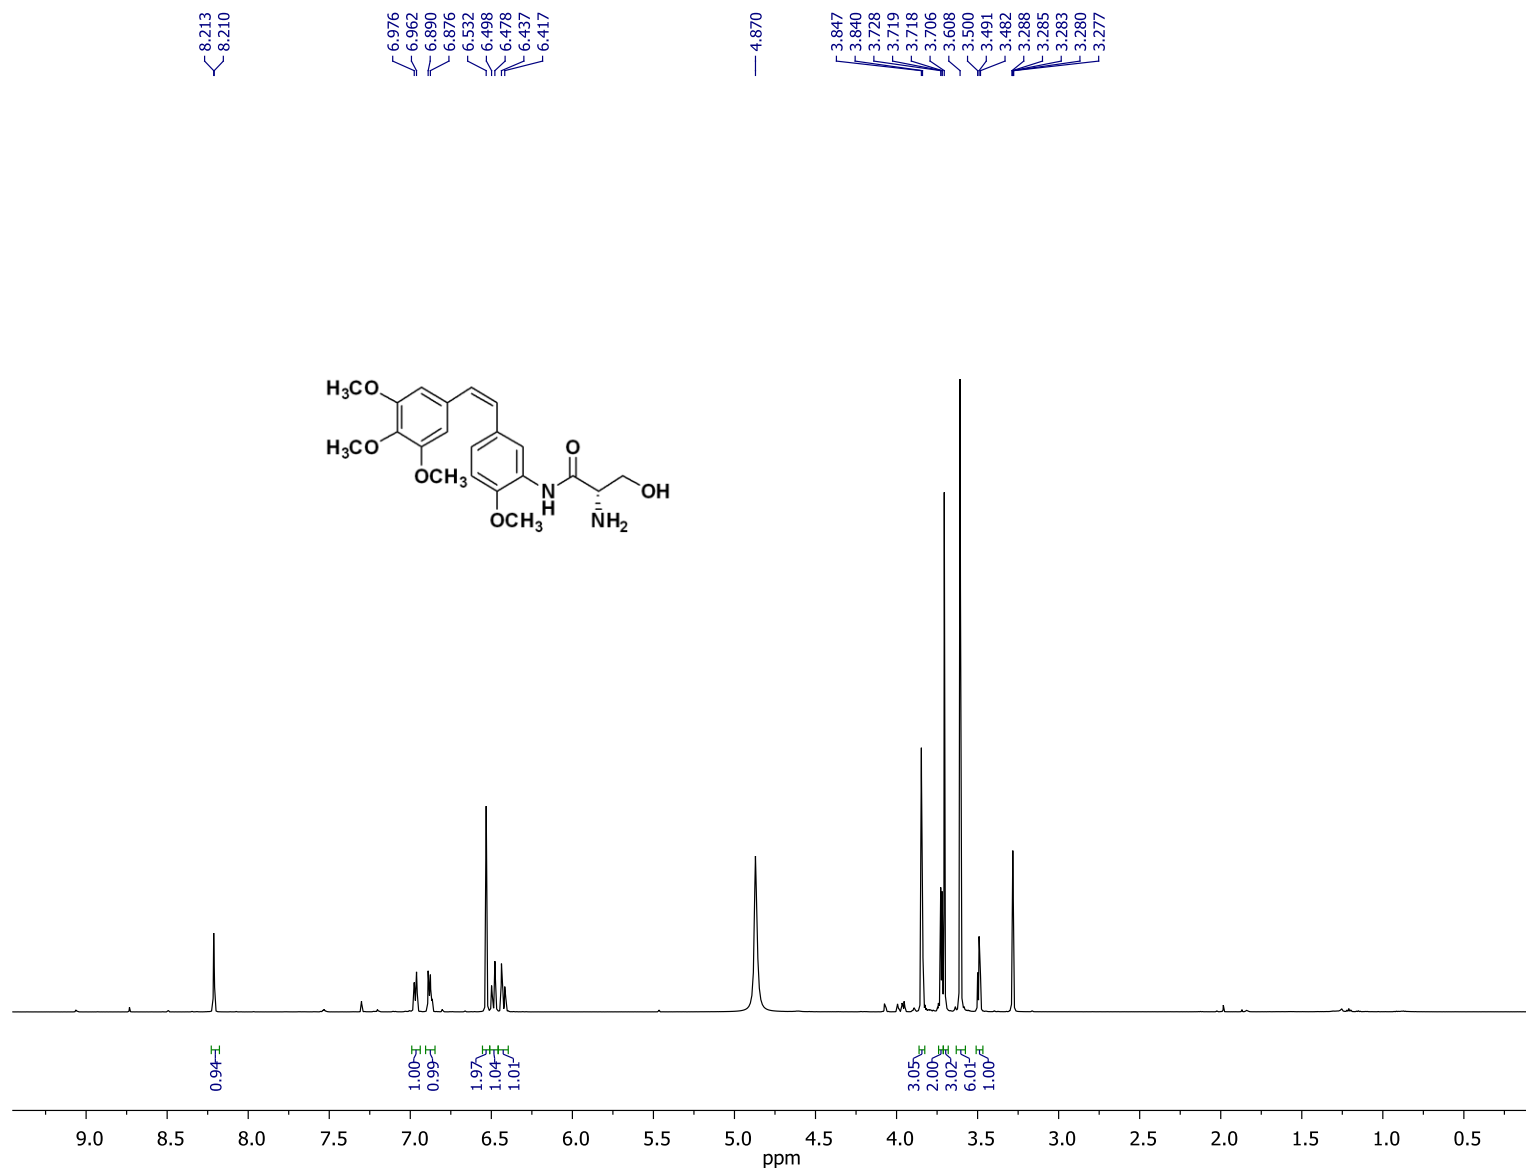

S240



$^{13}\text{C}$  NMR ( $\text{CD}_3\text{OD}$ , 150 MHz) for 3' CA4-*L*-serinamide

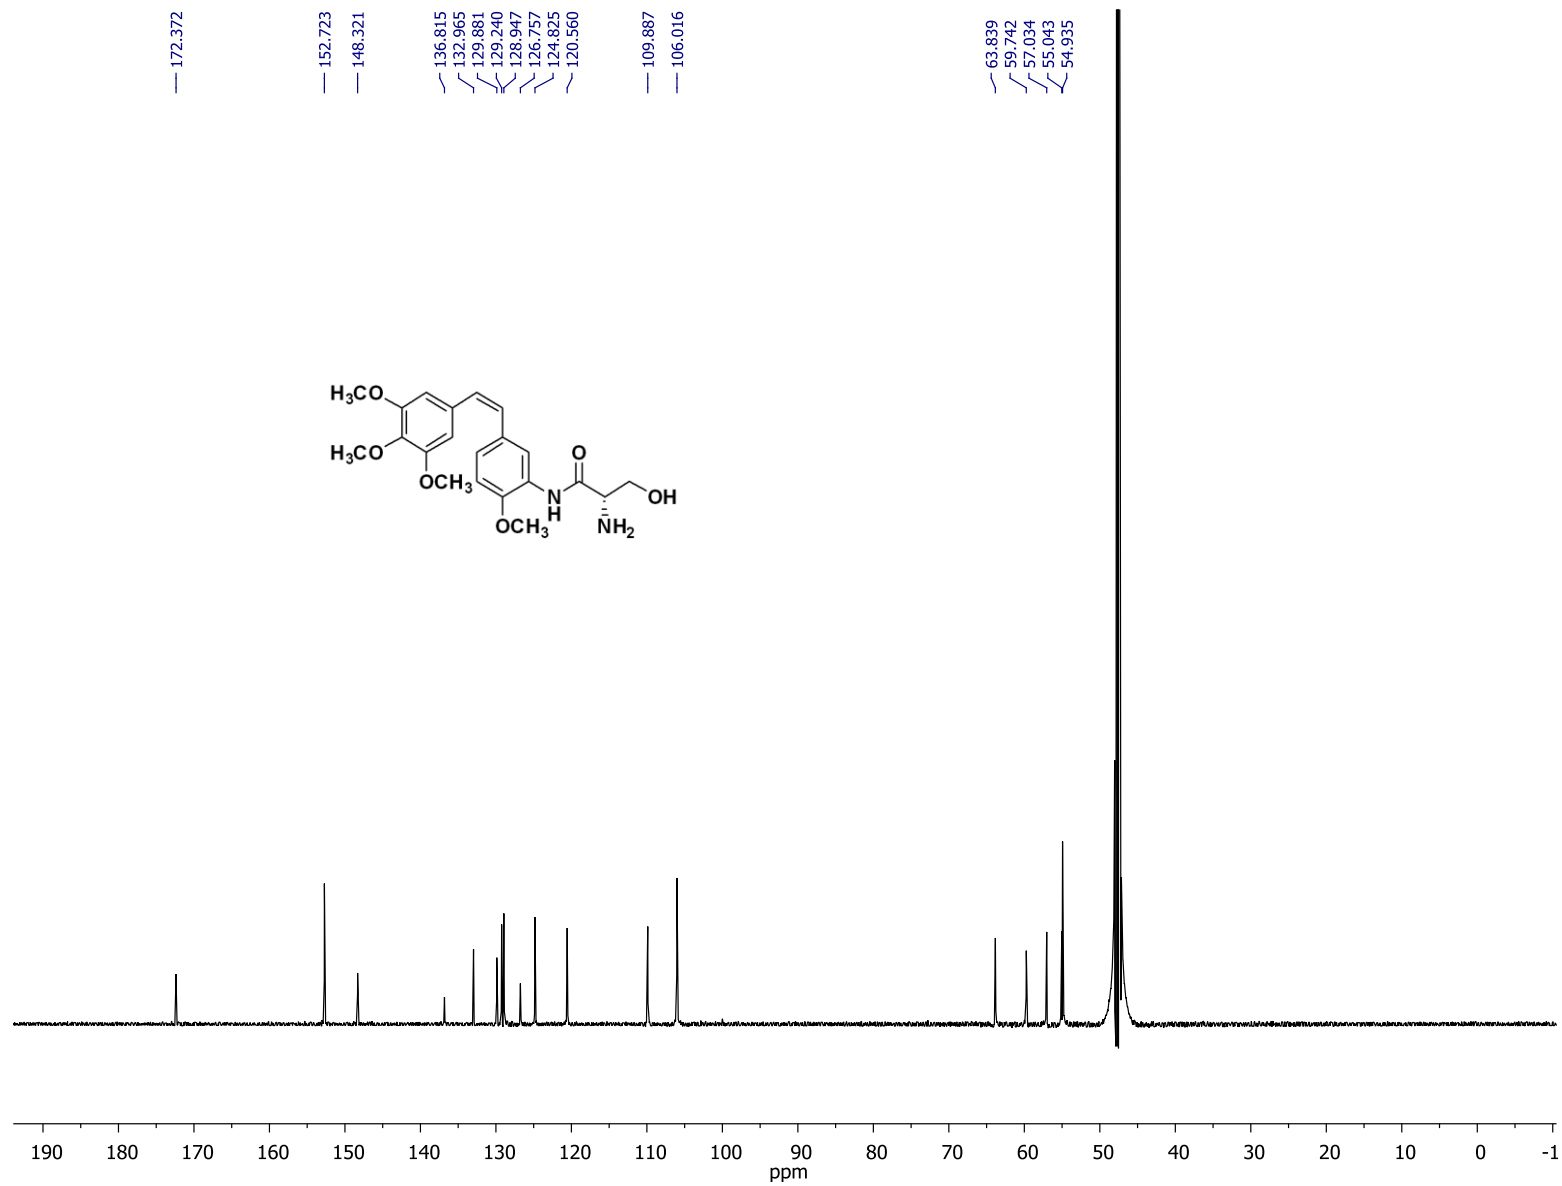

S241

# HRMS for 3' CA4-*L*-serinamide

C:\Xcalibur\...0602LD-VII-73\_Orbi\_+ESI

6/2/2015 5:10:31 PM

LD-VII-73

LD-VII-73\_Orbi\_+ESI #1 RT: 0.00 AV: 1 NL: 6  
T: FTMS + p ESI Full ms [50.00-1000.00]

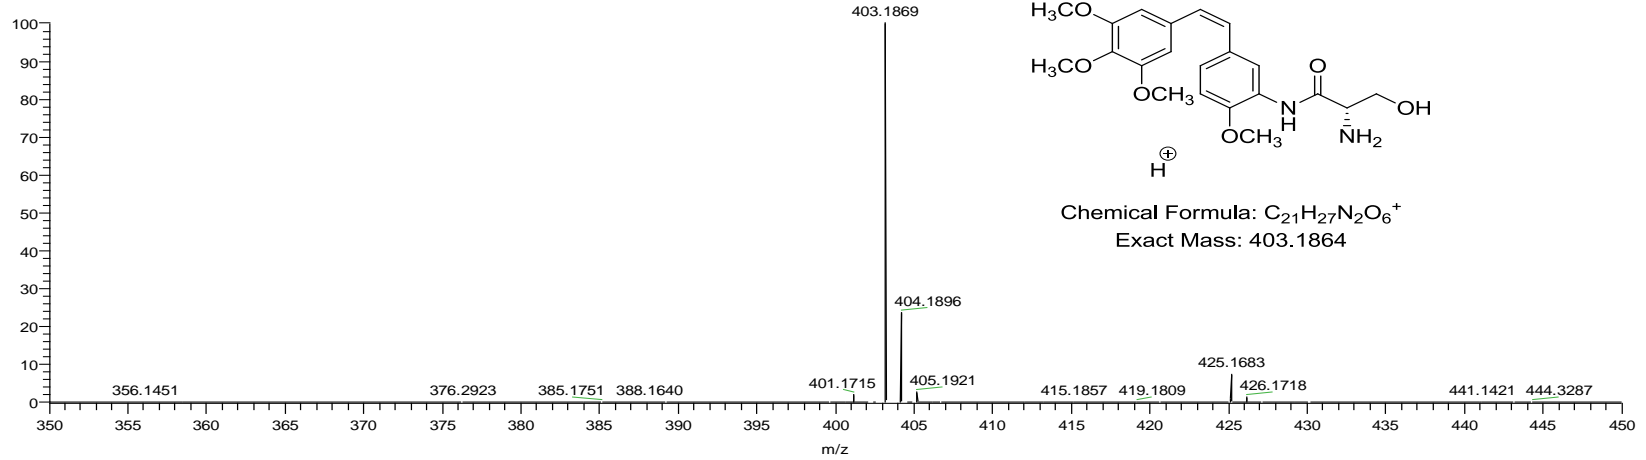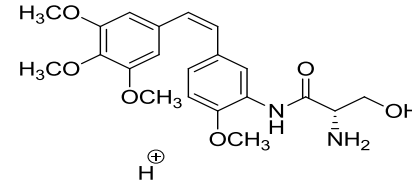

Chemical Formula: C<sub>21</sub>H<sub>27</sub>N<sub>2</sub>O<sub>6</sub><sup>+</sup>  
Exact Mass: 403.1864

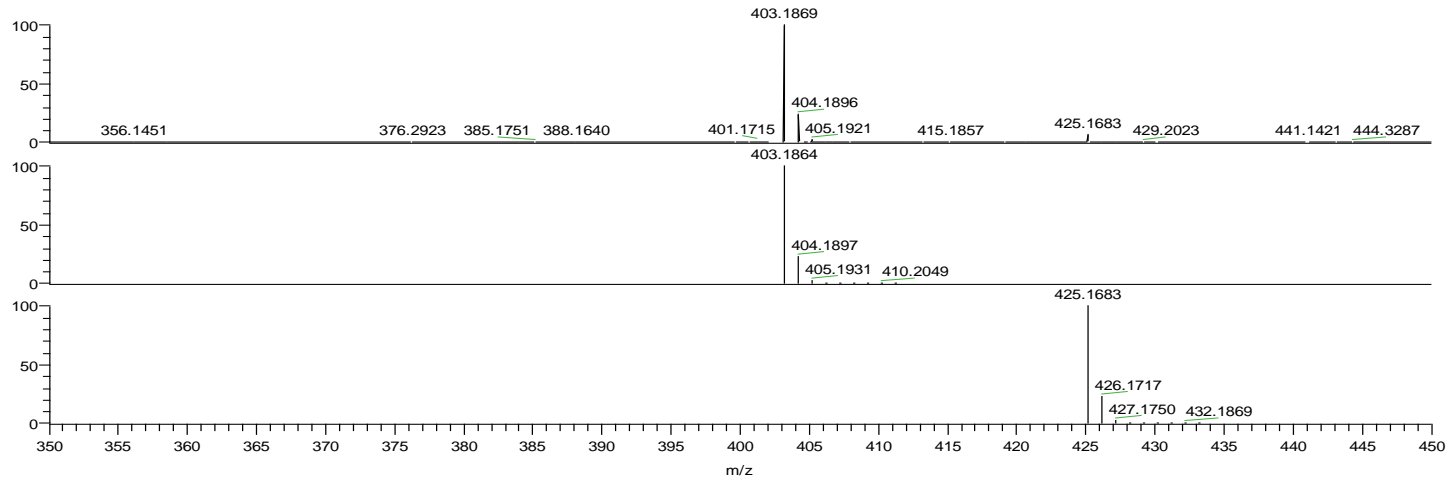

NL:  
6.01E8  
LD-VII-73\_Orbi\_+ESI#1  
RT: 0.00 AV: 1 T: FTMS  
+ p ESI Full ms  
[50.00-1000.00]

NL:  
7.78E5  
C<sub>21</sub>H<sub>26</sub>N<sub>2</sub>O<sub>6</sub> + H:  
C<sub>21</sub>H<sub>27</sub>N<sub>2</sub>O<sub>6</sub>  
pa Chrg 1

NL:  
7.78E5  
C<sub>21</sub>H<sub>26</sub>N<sub>2</sub>O<sub>6</sub> + Na:  
C<sub>21</sub>H<sub>26</sub>N<sub>2</sub>O<sub>6</sub> Na<sub>1</sub>  
pa Chrg 1

# HPLC for 3' CA4-L-serinamide

Data File C:\CHEM32\1\DATA\ERIC LIN\LD-VII-73A-R209.D

Sample Name: LD-VII-73A-R2

```
=====
Acq. Operator   : Eric Lin
Acq. Instrument : Instrument 1                Location : -
Injection Date  : 6/1/2015 12:29:03 PM
Acq. Method     : C:\CHEM32\1\METHODS\MASTERMETHOD.M
Last changed    : 6/1/2015 11:52:37 AM by Eric Lin
Analysis Method : C:\CHEM32\1\DATA\ERIC LIN\LD-VII-73A-R209.D\DA.M (MASTERMETHOD.M)
Last changed    : 6/1/2015 1:19:18 PM by Eric Lin
Sample Info     : wash
```

## Method:

0-5 min, 10:90 ACN/Water  
5-25 min, gradient, 10:90 to 100:00 ACN/Water  
25-30 min, 100:00 ACN/Water

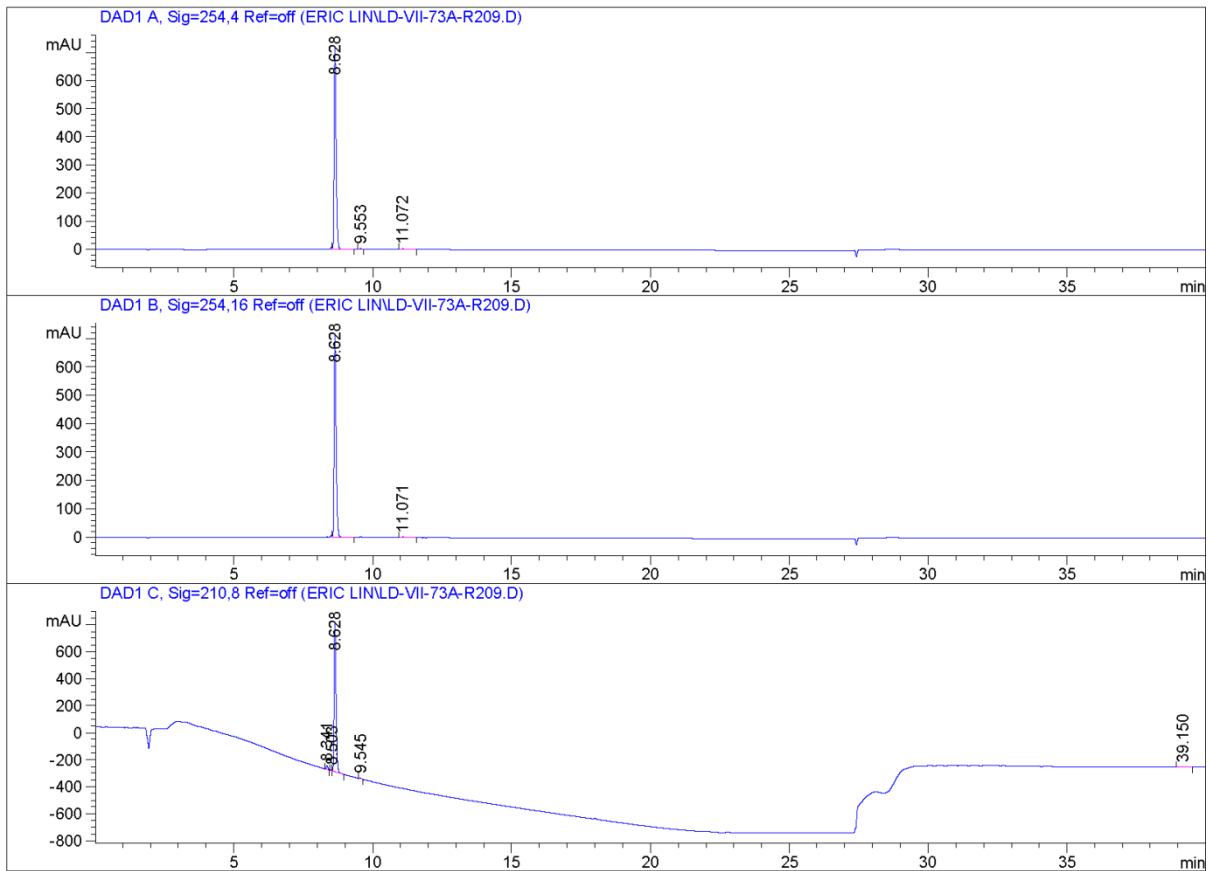

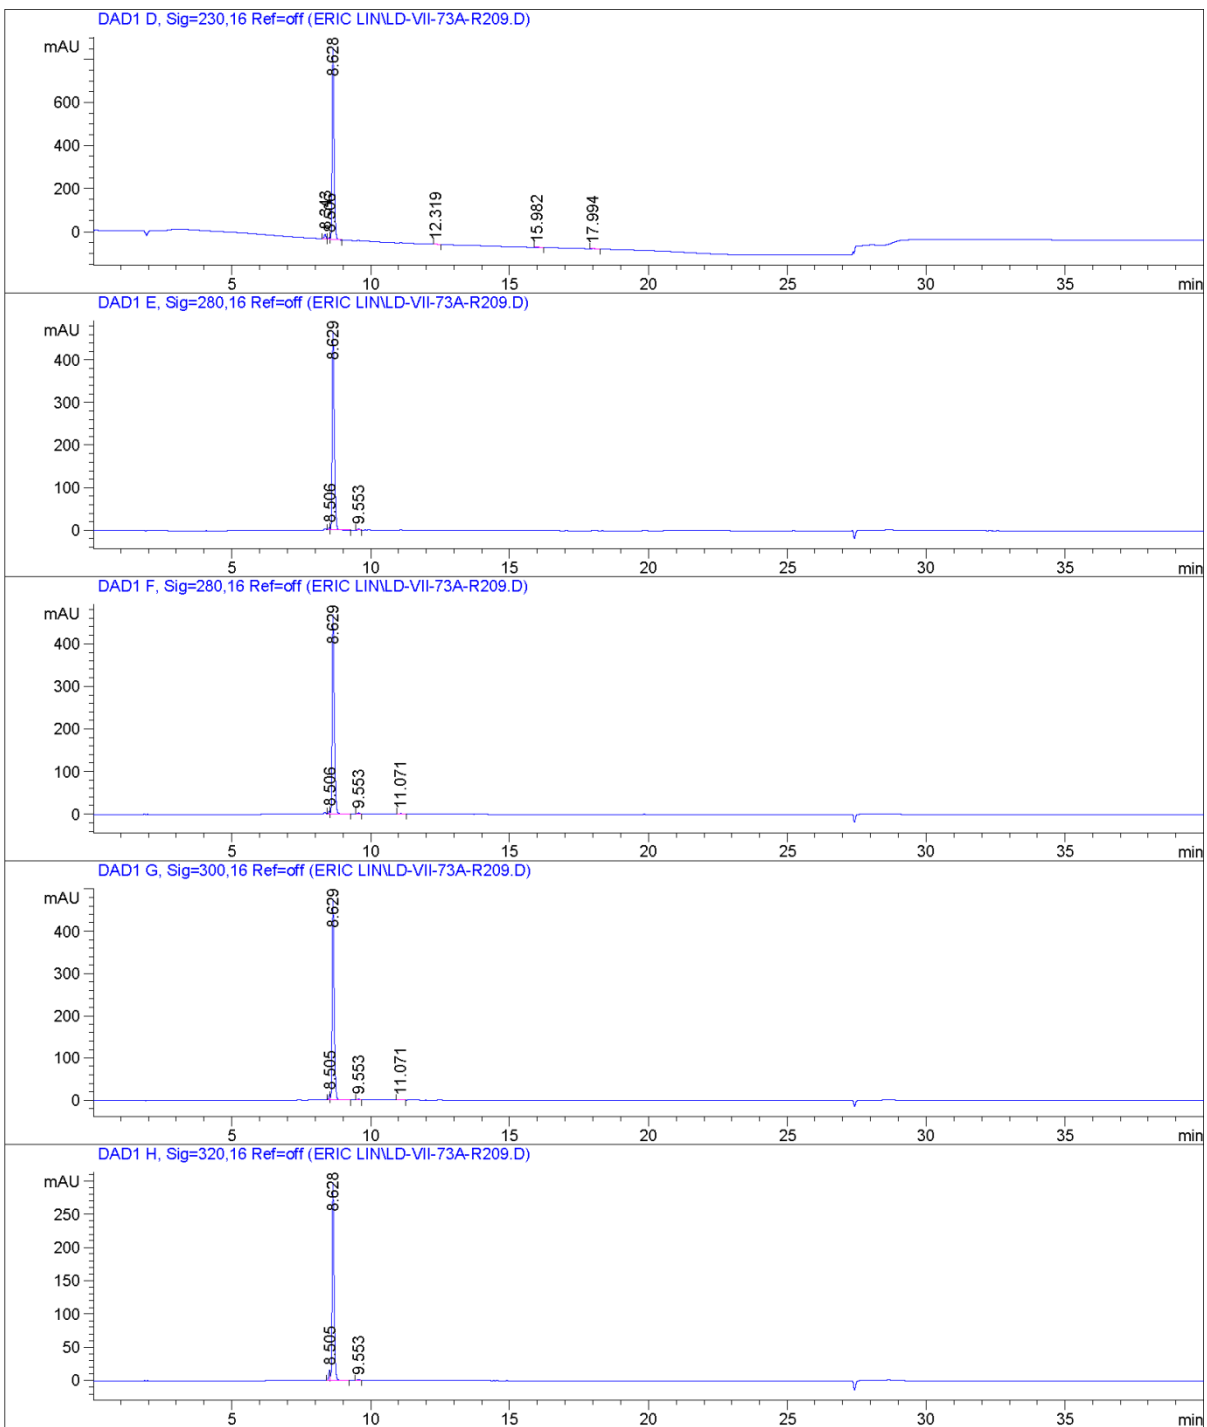

=====  
Area Percent Report  
=====

Sorted By : Signal  
Multiplier : 1.0000  
Dilution : 1.0000  
Use Multiplier & Dilution Factor with ISTDs

Signal 1: DAD1 A, Sig=254,4 Ref=off

| Peak # | RetTime [min] | Type | Width [min] | Area [mAU*s] | Height [mAU] | Area %  |
|--------|---------------|------|-------------|--------------|--------------|---------|
| 1      | 8.628         | VB   | 0.0761      | 3615.06738   | 725.35986    | 99.2925 |
| 2      | 9.553         | BB   | 0.0725      | 8.57860      | 1.83688      | 0.2356  |
| 3      | 11.072        | BB   | 0.1303      | 17.18025     | 1.78545      | 0.4719  |

Totals : 3640.82624 728.98219

Signal 2: DAD1 B, Sig=254,16 Ref=off

| Peak # | RetTime [min] | Type | Width [min] | Area [mAU*s] | Height [mAU] | Area %  |
|--------|---------------|------|-------------|--------------|--------------|---------|
| 1      | 8.628         | VB   | 0.0764      | 3597.92407   | 718.34595    | 99.5364 |
| 2      | 11.071        | BB   | 0.1264      | 16.75720     | 1.77018      | 0.4636  |

Totals : 3614.68127 720.11613

Signal 3: DAD1 C, Sig=210,8 Ref=off

| Peak # | RetTime [min] | Type | Width [min] | Area [mAU*s] | Height [mAU] | Area %  |
|--------|---------------|------|-------------|--------------|--------------|---------|
| 1      | 8.341         | BB   | 0.0702      | 125.12968    | 27.94563     | 2.2352  |
| 2      | 8.503         | BV   | 0.0582      | 32.47391     | 8.98720      | 0.5801  |
| 3      | 8.628         | VB   | 0.0744      | 5386.43848   | 1113.73535   | 96.2202 |
| 4      | 9.545         | BB   | 0.0701      | 25.45053     | 5.69919      | 0.4546  |
| 5      | 39.150        | BB   | 0.2871      | 28.53901     | 1.39256      | 0.5098  |

Totals : 5598.03160 1157.75993

Data File C:\CHEM32\1\DATA\ERIC LIN\LD-VII-73A-R209.D  
Sample Name: LD-VII-73A-R2

Signal 4: DAD1 D, Sig=230,16 Ref=off

| Peak # | RetTime [min] | Type | Width [min] | Area [mAU*s] | Height [mAU] | Area %  |
|--------|---------------|------|-------------|--------------|--------------|---------|
| 1      | 8.343         | BB   | 0.0704      | 97.43347     | 21.70703     | 2.1572  |
| 2      | 8.506         | BV   | 0.0582      | 33.81914     | 9.34663      | 0.7487  |
| 3      | 8.628         | VB   | 0.0748      | 4350.40234   | 893.63580    | 96.3168 |
| 4      | 12.319        | VB   | 0.1081      | 10.71834     | 1.41883      | 0.2373  |
| 5      | 15.982        | BB   | 0.1050      | 6.85785      | 1.01244      | 0.1518  |
| 6      | 17.994        | VB   | 0.0977      | 17.53352     | 2.63260      | 0.3882  |

Totals : 4516.76467 929.75333

Signal 5: DAD1 E, Sig=280,16 Ref=off

| Peak # | RetTime [min] | Type | Width [min] | Area [mAU*s] | Height [mAU] | Area %  |
|--------|---------------|------|-------------|--------------|--------------|---------|
| 1      | 8.506         | VV   | 0.0609      | 26.17398     | 6.80126      | 1.0126  |
| 2      | 8.629         | VB   | 0.0813      | 2547.08740   | 469.12259    | 98.5353 |
| 3      | 9.553         | BB   | 0.0732      | 11.68830     | 2.47169      | 0.4522  |

Totals : 2584.94968 478.39554

Signal 6: DAD1 F, Sig=280,16 Ref=off

| Peak # | RetTime [min] | Type | Width [min] | Area [mAU*s] | Height [mAU] | Area %  |
|--------|---------------|------|-------------|--------------|--------------|---------|
| 1      | 8.506         | VV   | 0.0609      | 26.17398     | 6.80126      | 1.0099  |
| 2      | 8.629         | VB   | 0.0813      | 2547.08740   | 469.12259    | 98.2801 |
| 3      | 9.553         | BB   | 0.0732      | 11.68830     | 2.47169      | 0.4510  |
| 4      | 11.071        | BB   | 0.0906      | 6.71148      | 1.07787      | 0.2590  |

Totals : 2591.66116 479.47341

Signal 7: DAD1 G, Sig=300,16 Ref=off

| Peak # | RetTime [min] | Type | Width [min] | Area [mAU*s] | Height [mAU] | Area %  |
|--------|---------------|------|-------------|--------------|--------------|---------|
| 1      | 8.505         | BV   | 0.0613      | 50.99851     | 13.13386     | 2.0432  |
| 2      | 8.629         | VB   | 0.0773      | 2427.22803   | 477.66873    | 97.2444 |
| 3      | 9.553         | BB   | 0.0727      | 11.26238     | 2.40055      | 0.4512  |
| 4      | 11.071        | BB   | 0.0867      | 6.51913      | 1.10683      | 0.2612  |

Data File C:\CHEM32\1\DATA\ERIC LIN\LD-VII-73A-R209.D  
Sample Name: LD-VII-73A-R2

| Peak #                                    | RetTime [min] | Type | Width [min] | Area [mAU*s] | Height [mAU] | Area % |
|-------------------------------------------|---------------|------|-------------|--------------|--------------|--------|
| ----- ----- ----- ----- ----- ----- ----- |               |      |             |              |              |        |
| Totals :                                  |               |      |             | 2496.00805   | 494.30997    |        |

Signal 8: DAD1 H, Sig=320,16 Ref=off

| Peak #                                    | RetTime [min] | Type | Width [min] | Area [mAU*s] | Height [mAU] | Area %  |
|-------------------------------------------|---------------|------|-------------|--------------|--------------|---------|
| ----- ----- ----- ----- ----- ----- ----- |               |      |             |              |              |         |
| 1                                         | 8.505         | BV   | 0.0623      | 62.80982     | 15.83393     | 4.0939  |
| 2                                         | 8.628         | VB   | 0.0754      | 1464.79163   | 297.60944    | 95.4747 |
| 3                                         | 9.553         | BB   | 0.0730      | 6.61850      | 1.40323      | 0.4314  |
| ----- ----- ----- ----- ----- ----- ----- |               |      |             |              |              |         |
| Totals :                                  |               |      |             | 1534.21994   | 314.84660    |         |

=====  
\*\*\* End of Report \*\*\*

<sup>1</sup>H NMR (CD<sub>3</sub>OD, 600 MHz) for AVE8062

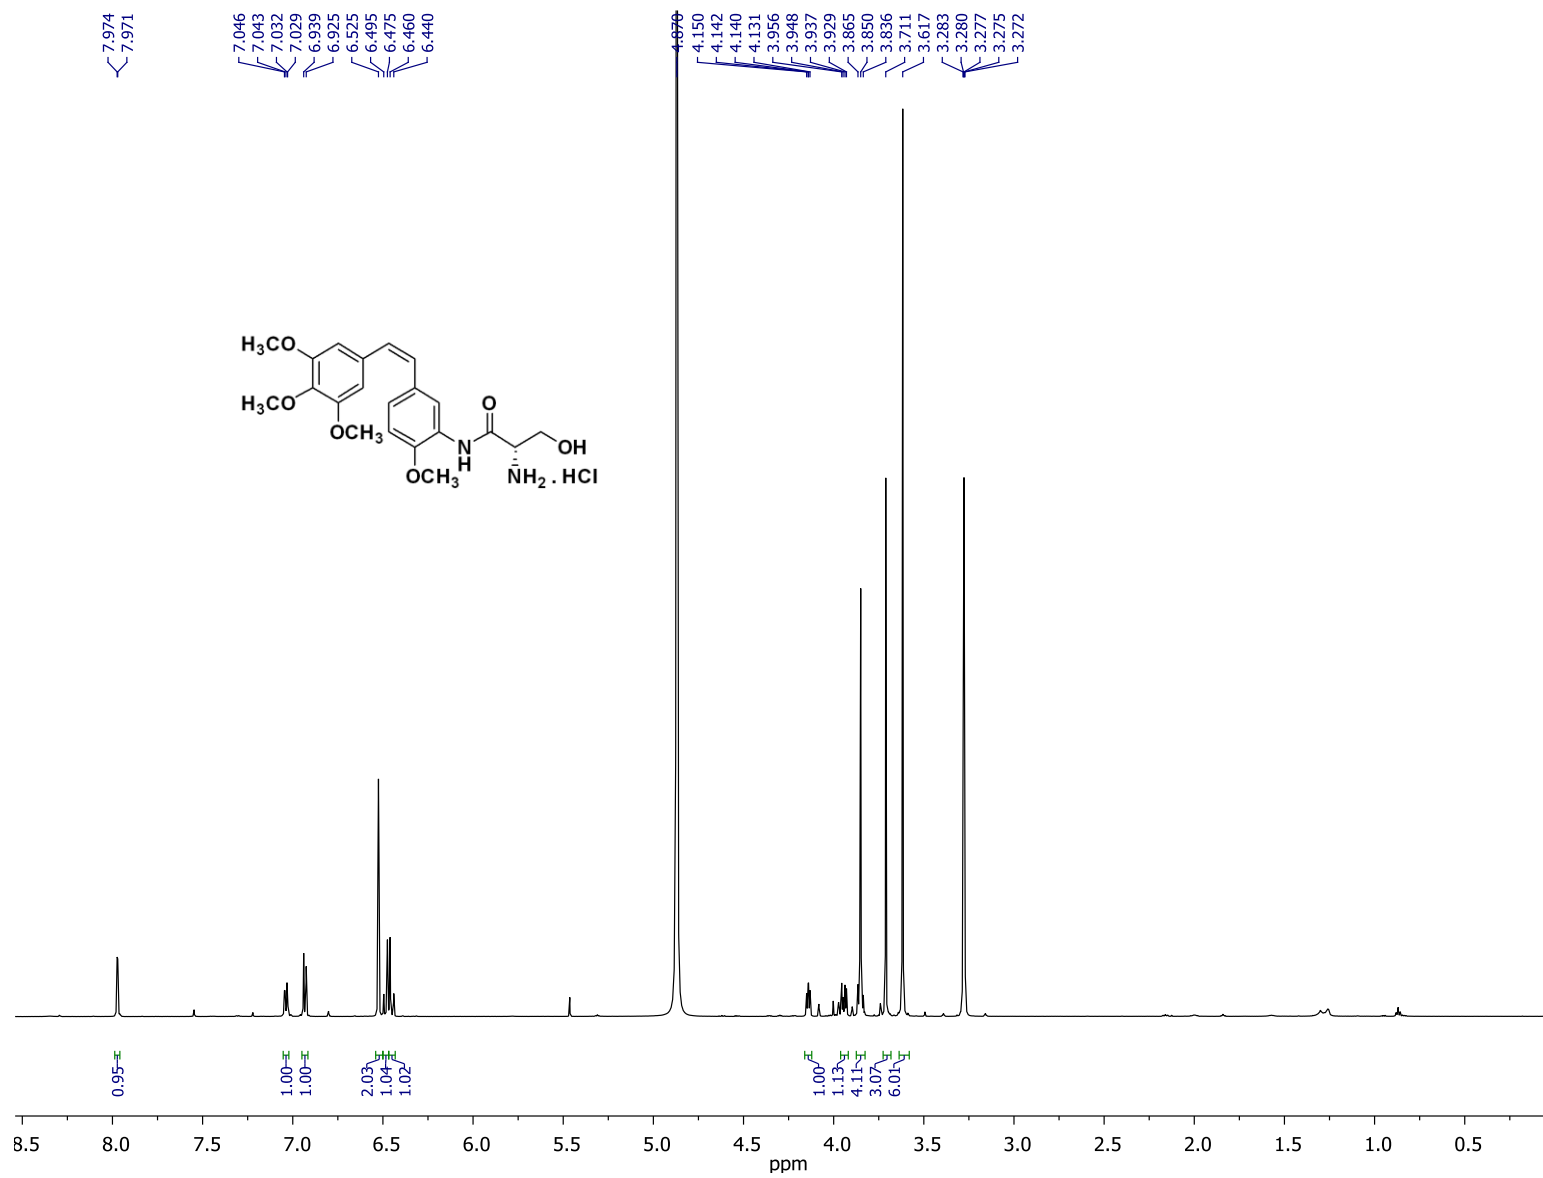

S248



$^{13}\text{C}$  NMR ( $\text{CD}_3\text{OD}$ , 150 MHz) for AVE8062

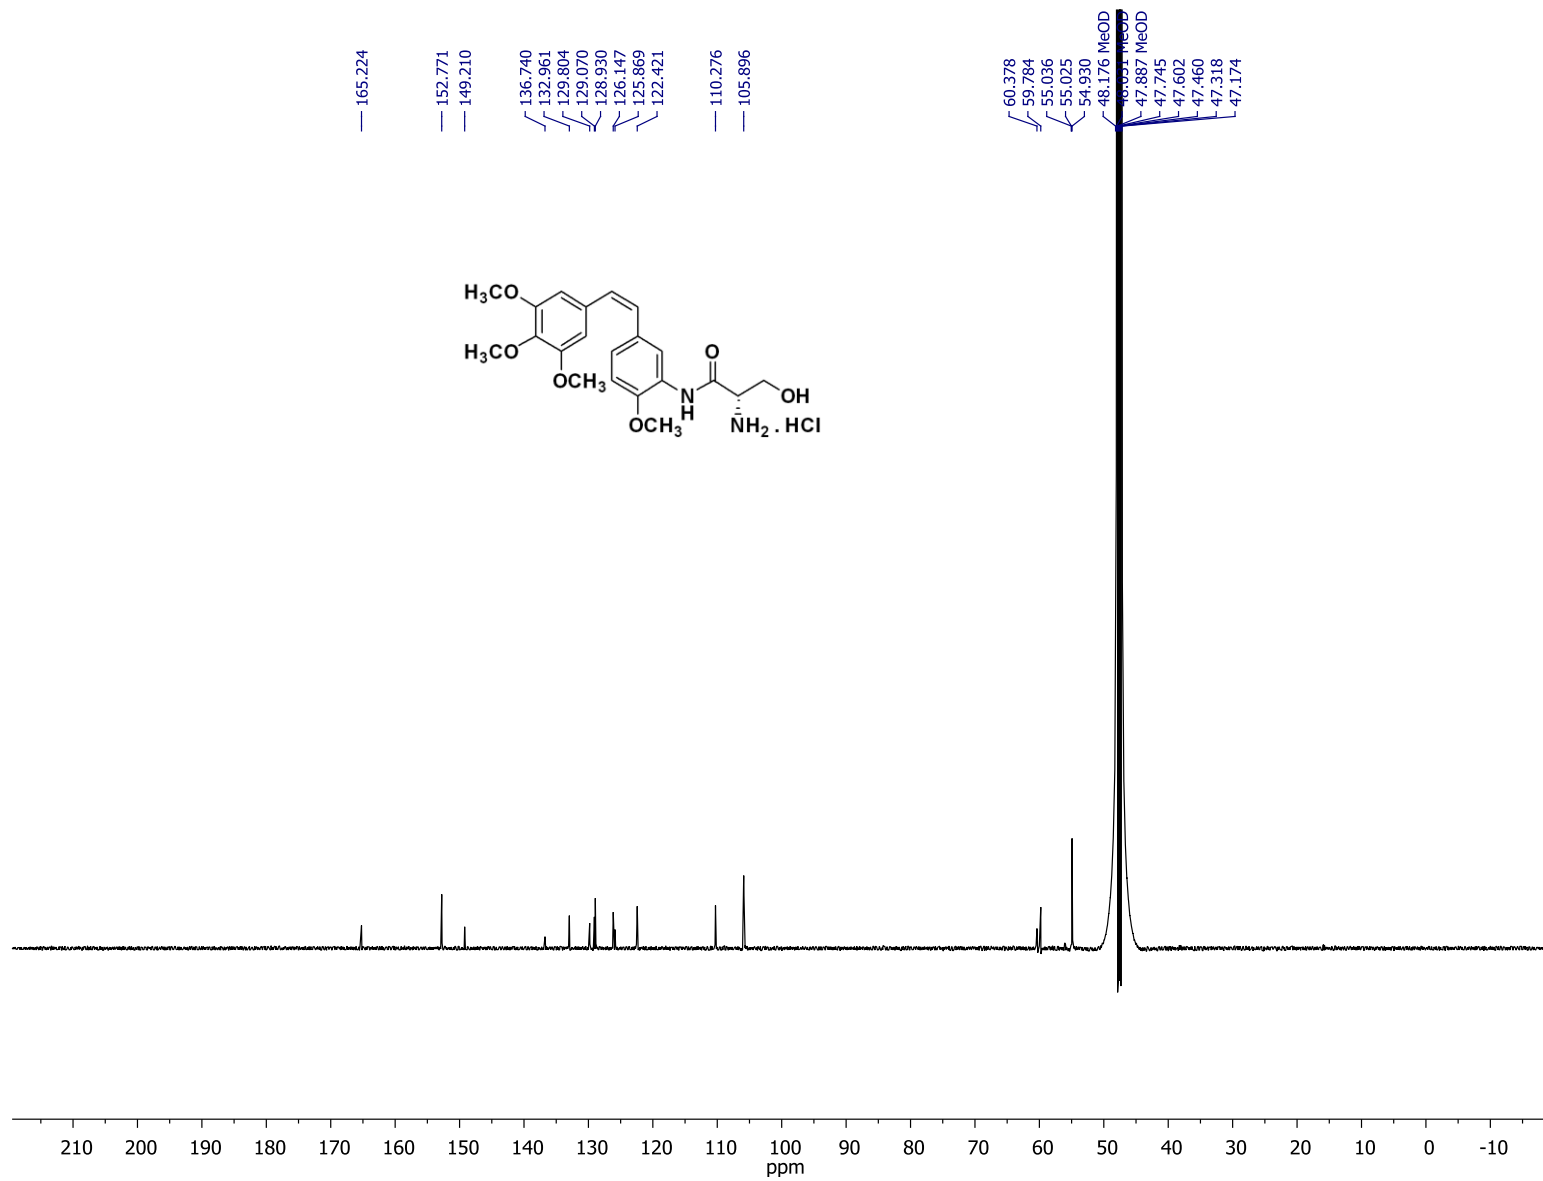

# HRMS for AVE8062

C:\Xcalibur\...\0602\LD-VII-75\_Orbi\_+ESI

6/2/2015 5:17:27 PM

LD-VII-75

LD-VII-75\_Orbi\_+ESI #1 RT: 0.00 AV: 1 NL: 8  
T: FTMS + p ESI Full ms [50.00-1000.00]

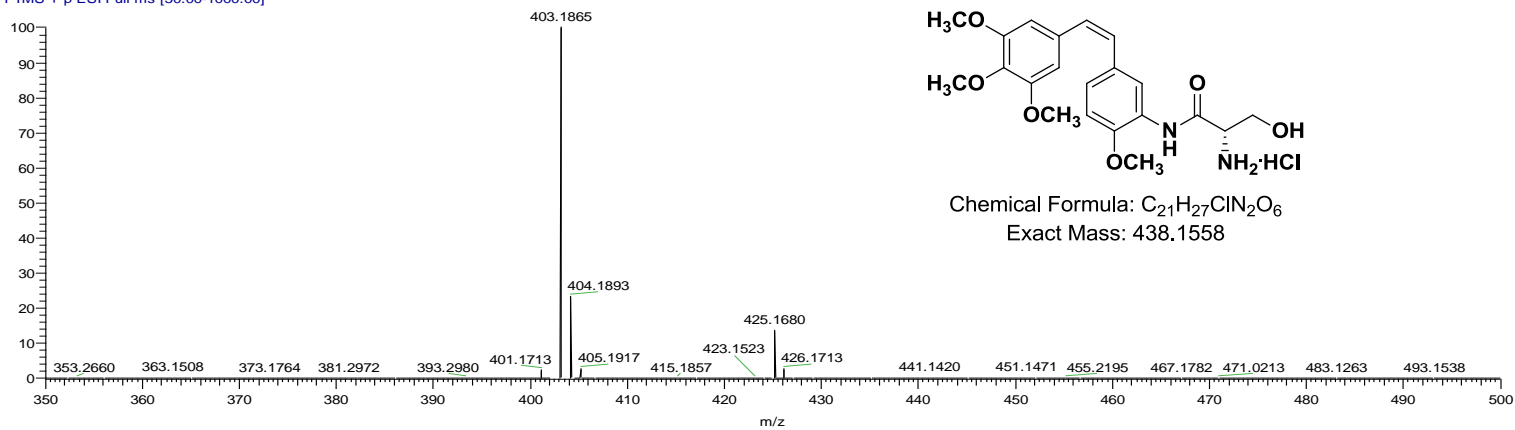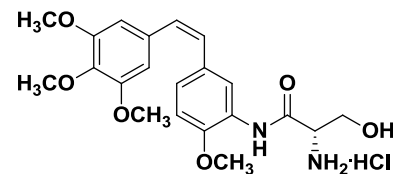

Chemical Formula:  $C_{21}H_{27}ClN_2O_6$   
Exact Mass: 438.1558

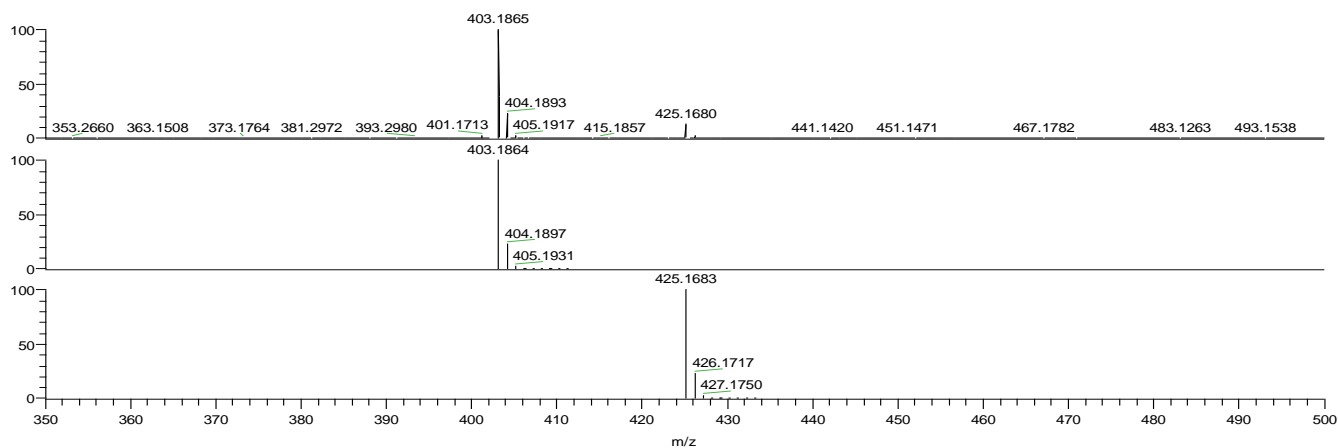

NL:  
8.84E7  
LD-VII-75\_Orbi\_+ESI#1  
RT: 0.00 AV: 1 T: FTMS  
+ p ESI Full ms  
[50.00-1000.00]

NL:  
7.78E5  
 $C_{21}H_{26}N_2O_6 + H$   
 $C_{21}H_{27}N_2O_6$   
pa Chrg 1

NL:  
7.78E5  
 $C_{21}H_{26}N_2O_6 + Na$   
 $C_{21}H_{26}N_2O_6 Na_1$   
pa Chrg 1

# HPLC for AVE8062

Data File C:\CHEM32\1\DATA\ERIC LIN\AVE-8062-R10005.D  
Sample Name: AVE-8062-R1

=====

Acq. Operator : Eric Lin  
Acq. Instrument : Instrument 1 Location : -  
Injection Date : 6/2/2015 12:52:41 PM  
Acq. Method : C:\CHEM32\1\METHODS\MASTERMETHOD.M  
Last changed : 6/2/2015 12:44:32 PM by Eric Lin  
(modified after loading)  
Analysis Method : C:\CHEM32\1\DATA\ERIC LIN\AVE-8062-R10005.D\DA.M (MASTERMETHOD.M)  
Last changed : 6/2/2015 2:28:03 PM by Eric Lin  
Sample Info : WASH

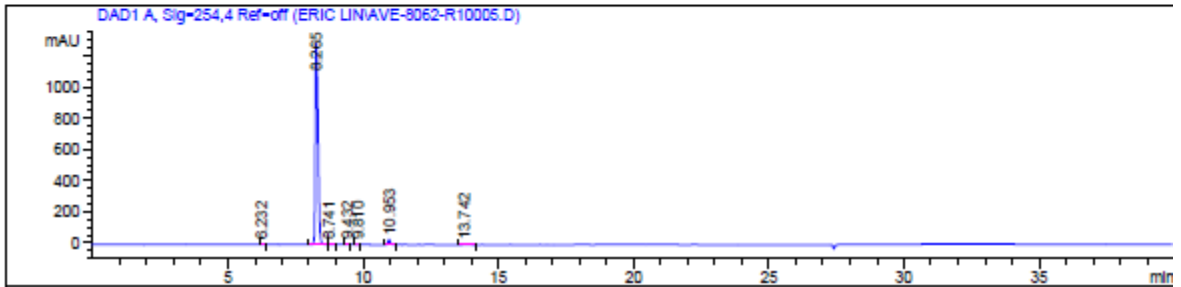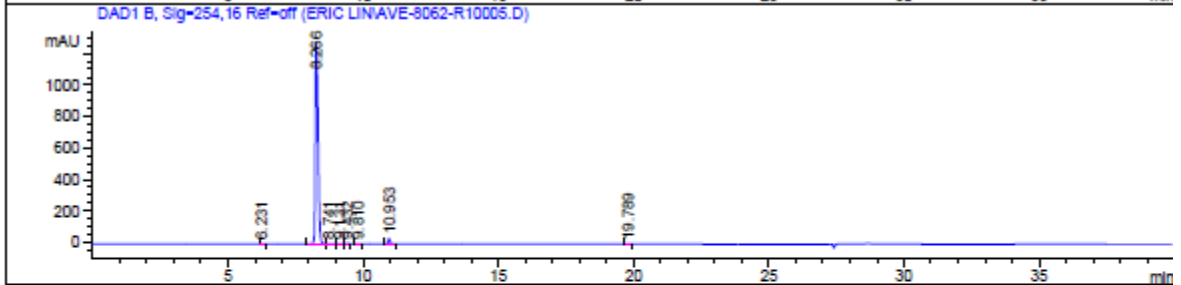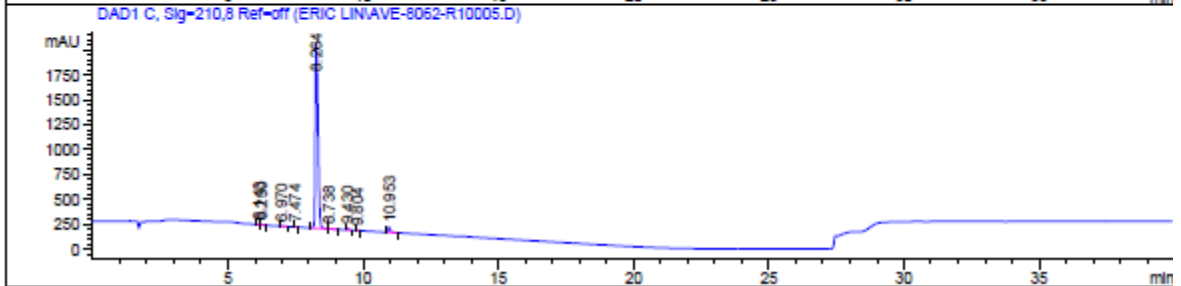

Data File C:\CHEM32\1\DATA\ERIC LIN\AVE-8062-R10005.D  
Sample Name: AVE-8062-R1

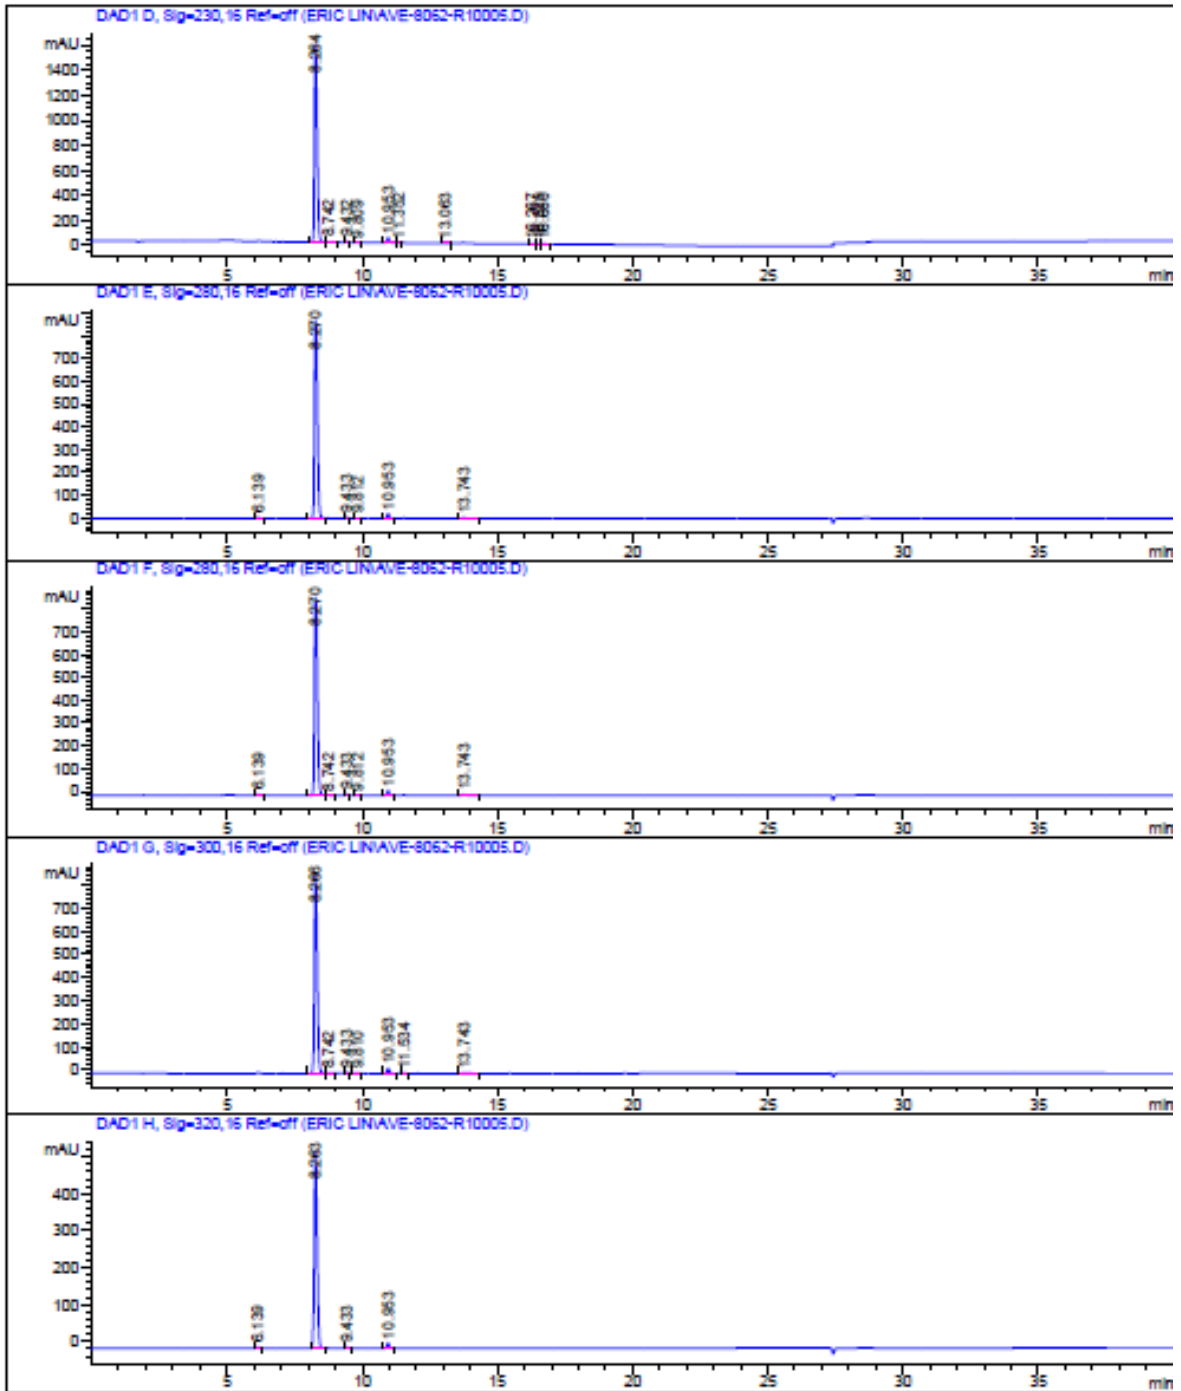

Data File C:\CHEM32\1\DATA\ERIC LIN\AVE-8062-R10005.D  
Sample Name: AVE-8062-R1

=====  
Area Percent Report  
=====

Sorted By : Signal  
Multiplier : 1.0000  
Dilution : 1.0000  
Use Multiplier & Dilution Factor with ISTDs

Signal 1: DAD1 A, Sig=254,4 Ref=off

| Peak # | RetTime [min] | Type | Width [min] | Area [mAU*s] | Height [mAU] | Area %  |
|--------|---------------|------|-------------|--------------|--------------|---------|
| 1      | 6.232         | VB   | 0.0727      | 7.52764      | 1.54801      | 0.0804  |
| 2      | 8.265         | BV   | 0.1118      | 9095.58008   | 1296.55225   | 97.1534 |
| 3      | 8.741         | VV   | 0.1199      | 15.38805     | 1.72812      | 0.1644  |
| 4      | 9.432         | VB   | 0.0763      | 19.83443     | 3.97215      | 0.2119  |
| 5      | 9.810         | BB   | 0.0796      | 11.97414     | 2.26929      | 0.1279  |
| 6      | 10.953        | BB   | 0.0813      | 187.22200    | 34.52772     | 1.9998  |
| 7      | 13.742        | BB   | 0.1673      | 24.55193     | 2.11709      | 0.2622  |

Totals : 9362.07827 1342.71463

Signal 2: DAD1 B, Sig=254,16 Ref=off

| Peak # | RetTime [min] | Type | Width [min] | Area [mAU*s] | Height [mAU] | Area %  |
|--------|---------------|------|-------------|--------------|--------------|---------|
| 1      | 6.231         | VB   | 0.0696      | 7.30522      | 1.53343      | 0.0782  |
| 2      | 8.266         | BV   | 0.1122      | 9068.53711   | 1286.86707   | 97.0999 |
| 3      | 8.741         | VV   | 0.1311      | 19.50147     | 1.97604      | 0.2088  |
| 4      | 9.131         | VV   | 0.1193      | 8.92628      | 1.00854      | 0.0956  |
| 5      | 9.432         | VV   | 0.0819      | 25.36259     | 4.63422      | 0.2716  |
| 6      | 9.810         | VB   | 0.0887      | 14.70501     | 2.42779      | 0.1575  |
| 7      | 10.953        | BB   | 0.0812      | 185.16338    | 34.15549     | 1.9826  |
| 8      | 19.789        | BB   | 0.0890      | 9.88684      | 1.72187      | 0.1059  |

Totals : 9339.38790 1334.32444

Signal 3: DAD1 C, Sig=210,8 Ref=off

| Peak # | RetTime [min] | Type | Width [min] | Area [mAU*s] | Height [mAU] | Area % |
|--------|---------------|------|-------------|--------------|--------------|--------|
| 1      | 6.143         | BV   | 0.0688      | 29.88397     | 6.60556      | 0.2195 |
| 2      | 6.230         | VB   | 0.0716      | 43.34299     | 9.09865      | 0.3183 |
| 3      | 6.970         | VB   | 0.1280      | 22.19154     | 2.31232      | 0.1630 |

Data File C:\CHEM32\1\DATA\ERIC LIN\AVE-8062-R10005.D  
 Sample Name: AVE-8062-R1

| Peak #   | RetTime [min] | Type | Width [min] | Area [mAU*s] | Height [mAU] | Area %  |
|----------|---------------|------|-------------|--------------|--------------|---------|
| 4        | 7.474         | BB   | 0.0867      | 7.42790      | 1.19249      | 0.0546  |
| 5        | 8.264         | BV   | 0.1121      | 1.31104e4    | 1863.22046   | 96.2920 |
| 6        | 8.738         | VB   | 0.1087      | 29.73862     | 3.74297      | 0.2184  |
| 7        | 9.430         | BB   | 0.0793      | 74.17680     | 14.59327     | 0.5448  |
| 8        | 9.804         | BB   | 0.0708      | 12.46281     | 2.75495      | 0.0915  |
| 9        | 10.953        | BV   | 0.0808      | 285.62799    | 53.03270     | 2.0979  |
| Totals : |               |      |             | 1.36152e4    | 1956.55338   |         |

Signal 4: DAD1 D, Sig=230,16 Ref=off

| Peak #   | RetTime [min] | Type | Width [min] | Area [mAU*s] | Height [mAU] | Area %  |
|----------|---------------|------|-------------|--------------|--------------|---------|
| 1        | 8.264         | BV   | 0.1086      | 1.09526e4    | 1585.03564   | 96.7945 |
| 2        | 8.742         | VV   | 0.1154      | 24.17192     | 2.83805      | 0.2136  |
| 3        | 9.432         | VB   | 0.0771      | 47.90776     | 9.44978      | 0.4234  |
| 4        | 9.809         | BB   | 0.0822      | 14.80064     | 2.69172      | 0.1308  |
| 5        | 10.953        | BV   | 0.0824      | 231.90778    | 42.03893     | 2.0495  |
| 6        | 11.352        | VV   | 0.0903      | 10.09067     | 1.72249      | 0.0892  |
| 7        | 13.063        | BB   | 0.1017      | 8.28207      | 1.24403      | 0.0732  |
| 8        | 16.267        | BB   | 0.0863      | 7.61213      | 1.38036      | 0.0673  |
| 9        | 16.529        | BV   | 0.0940      | 7.70709      | 1.28438      | 0.0681  |
| 10       | 16.680        | VV   | 0.1121      | 10.23456     | 1.29656      | 0.0904  |
| Totals : |               |      |             | 1.13153e4    | 1648.98195   |         |

Signal 5: DAD1 E, Sig=280,16 Ref=off

| Peak #   | RetTime [min] | Type | Width [min] | Area [mAU*s] | Height [mAU] | Area %  |
|----------|---------------|------|-------------|--------------|--------------|---------|
| 1        | 6.139         | BB   | 0.0786      | 27.36969     | 5.27338      | 0.4053  |
| 2        | 8.270         | BV   | 0.1215      | 6523.29443   | 869.58826    | 96.6053 |
| 3        | 9.433         | BB   | 0.0751      | 25.17395     | 5.13926      | 0.3728  |
| 4        | 9.812         | BB   | 0.0839      | 7.86839      | 1.39310      | 0.1165  |
| 5        | 10.953        | BB   | 0.0813      | 117.99647    | 21.75365     | 1.7474  |
| 6        | 13.743        | BB   | 0.1650      | 50.81811     | 4.39317      | 0.7526  |
| Totals : |               |      |             | 6752.52103   | 907.54081    |         |

Data File C:\CHEM32\1\DATA\ERIC LIN\AVE-8062-R10005.D  
Sample Name: AVE-8062-R1

Signal 6: DAD1 F, Sig=280,16 Ref=off

| Peak # | RetTime [min] | Type | Width [min] | Area [mAU*s] | Height [mAU] | Area %  |
|--------|---------------|------|-------------|--------------|--------------|---------|
| 1      | 6.139         | BB   | 0.0786      | 27.37036     | 5.27350      | 0.4045  |
| 2      | 8.270         | BV   | 0.1215      | 6523.28369   | 869.58813    | 96.4126 |
| 3      | 8.742         | VB   | 0.1035      | 13.48111     | 1.84035      | 0.1992  |
| 4      | 9.433         | BB   | 0.0751      | 25.17586     | 5.13947      | 0.3721  |
| 5      | 9.812         | BB   | 0.0839      | 7.87010      | 1.39290      | 0.1163  |
| 6      | 10.953        | BB   | 0.0813      | 118.00455    | 21.75415     | 1.7441  |
| 7      | 13.743        | BB   | 0.1650      | 50.82064     | 4.39342      | 0.7511  |

Totals :                   6766.00630  909.38193

Signal 7: DAD1 G, Sig=300,16 Ref=off

| Peak # | RetTime [min] | Type | Width [min] | Area [mAU*s] | Height [mAU] | Area %  |
|--------|---------------|------|-------------|--------------|--------------|---------|
| 1      | 8.266         | BV   | 0.1147      | 6275.62891   | 864.02368    | 96.8008 |
| 2      | 8.742         | VB   | 0.1013      | 11.85244     | 1.66092      | 0.1828  |
| 3      | 9.433         | BB   | 0.0753      | 24.58060     | 5.00164      | 0.3792  |
| 4      | 9.810         | BB   | 0.0814      | 7.66697      | 1.41149      | 0.1183  |
| 5      | 10.953        | BB   | 0.0824      | 125.00182    | 22.64232     | 1.9281  |
| 6      | 11.534        | VB   | 0.0826      | 7.59221      | 1.37027      | 0.1171  |
| 7      | 13.743        | BB   | 0.1655      | 30.70807     | 2.64326      | 0.4737  |

Totals :                   6483.03103  898.75359

Signal 8: DAD1 H, Sig=320,16 Ref=off

| Peak # | RetTime [min] | Type | Width [min] | Area [mAU*s] | Height [mAU] | Area %  |
|--------|---------------|------|-------------|--------------|--------------|---------|
| 1      | 6.139         | BB   | 0.0714      | 17.48327     | 3.81790      | 0.4340  |
| 2      | 8.263         | BV   | 0.1134      | 3913.47534   | 534.81958    | 97.1548 |
| 3      | 9.433         | BB   | 0.0760      | 14.63547     | 2.94218      | 0.3633  |
| 4      | 10.953        | BB   | 0.0840      | 82.49001     | 14.57937     | 2.0479  |

Totals :                   4028.08409  556.15903

=====  
\*\*\* End of Report \*\*\*

# Enzymatic Assays of Leucine Aminopeptidase

(Determination of Enzyme Units; Substrate: *L*-leucine *p*-nitroanilide)

## Enzymatic Assay of LAP (Sigma-Aldrich)

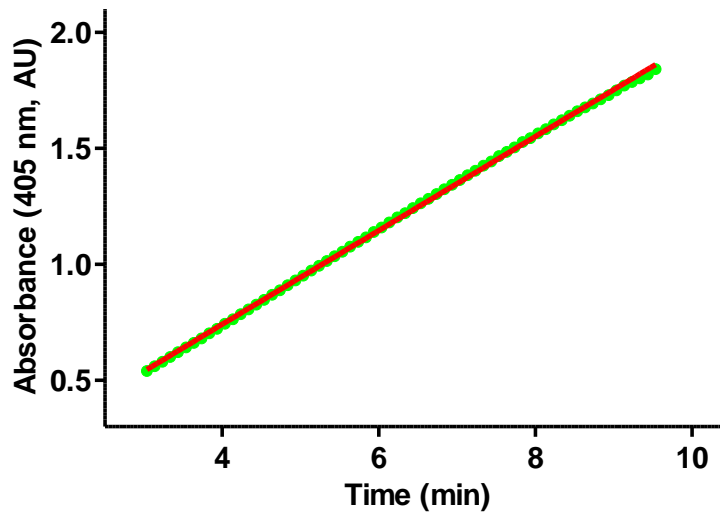

## Enzymatic Assay of LAP (Calzyme)

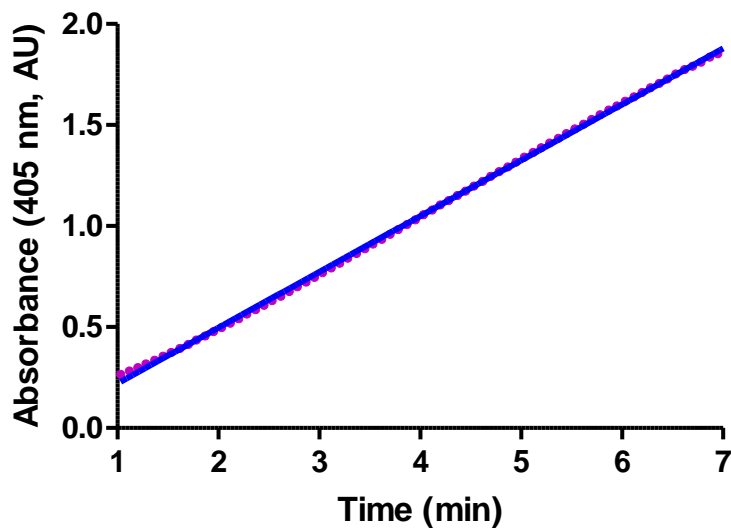



## HPLC Conditions

Method 1: solvent A acetonitrile, solvent B 0.05% TFA in H<sub>2</sub>O; isocratic, 30%A/70%B.

Method 2: solvent A acetonitrile, solvent B 0.05% TFA in H<sub>2</sub>O; isocratic, 28%A/72%B.

Method 3: solvent A acetonitrile, solvent B 0.05% TFA in H<sub>2</sub>O; isocratic, 26%A/74%B.

## HPLC Chromatograms of Compounds 7, 15 and 16

### Chromatogram of 40 $\mu$ M Each of Compounds 7 and 15 (Method 3)

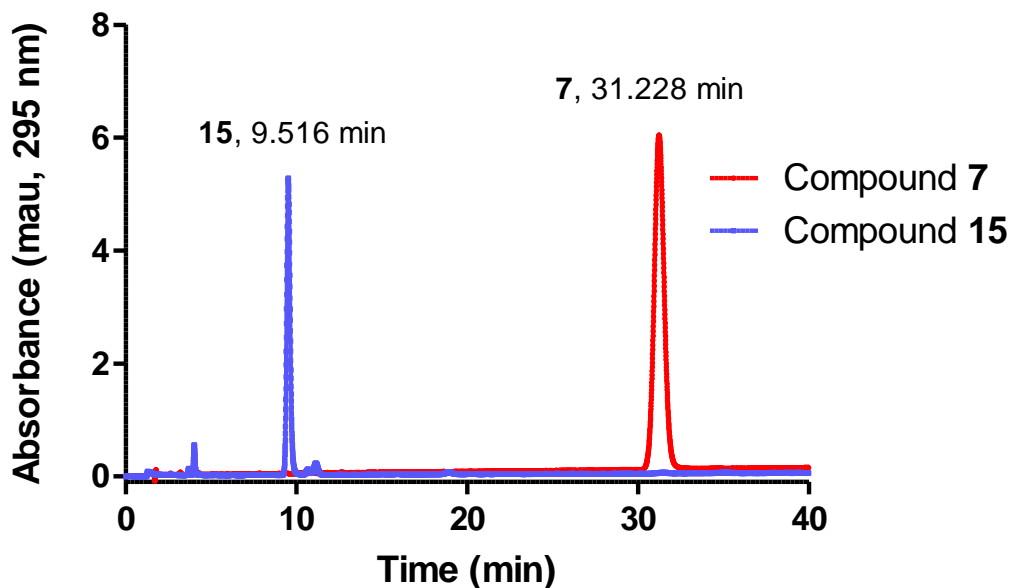

[Note: Retention times of compounds 7 and 15 were determined separately as standards in HPLC with the same mobile phase. The chromatograms were combined for comparison purposes.]

### Chromatogram of 40 $\mu$ M Each of Compounds 7 and 16 (Method 3)

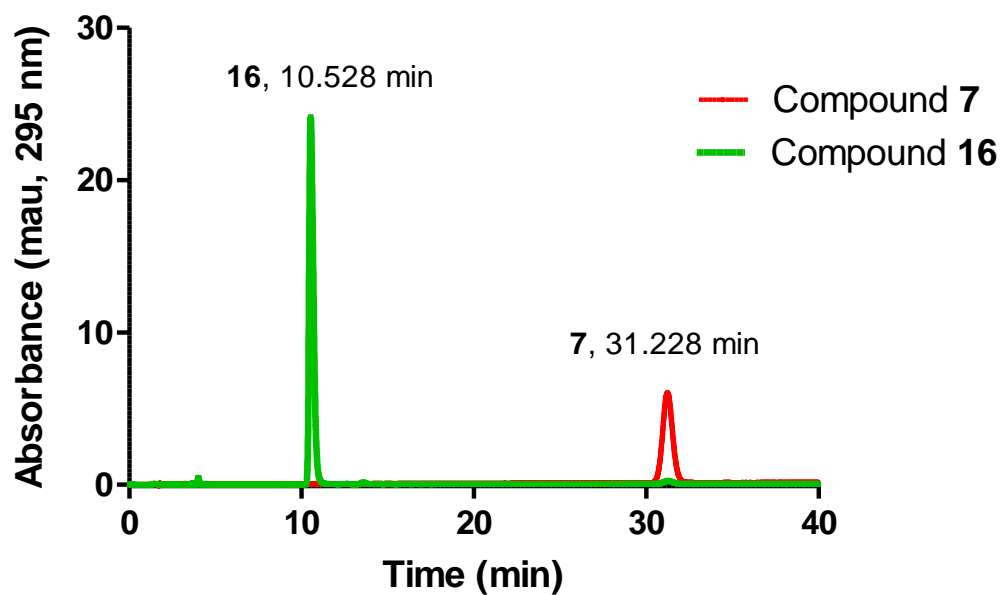

[Note: Retention times of compounds 7 and 16 were determined separately as standards in HPLC with the same mobile phase. The chromatograms were combined for comparison purposes.]

# HPLC Chromatograms of Compounds 15 and 16 Before and After Leucine Aminopeptidase Digestion

Chromatogram of 40 h non-LAP-treated compound 15 (Control) (Method 3)

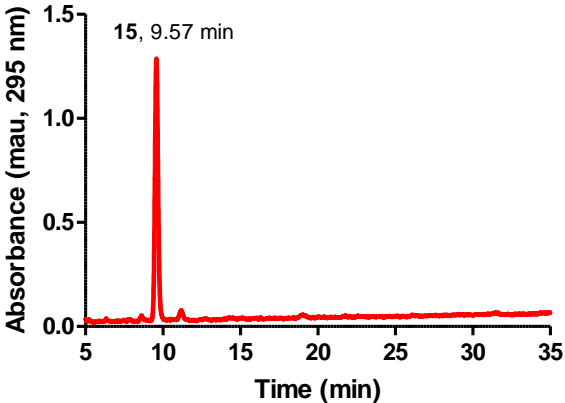

Chromatogram of 40 h LAP-treated (1.5 U) compound 15 (Method 3)

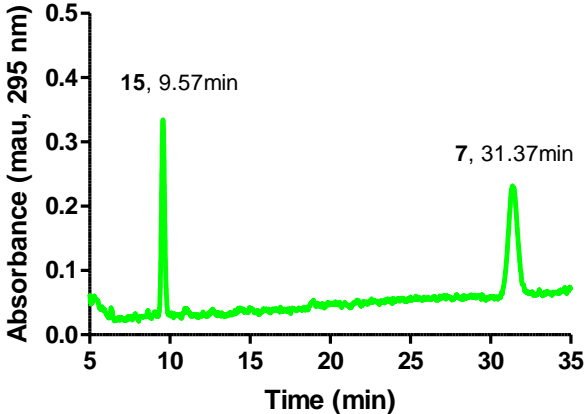

Chromatogram of 40 h non-LAP-treated compound 16 (Control) (Method 3)

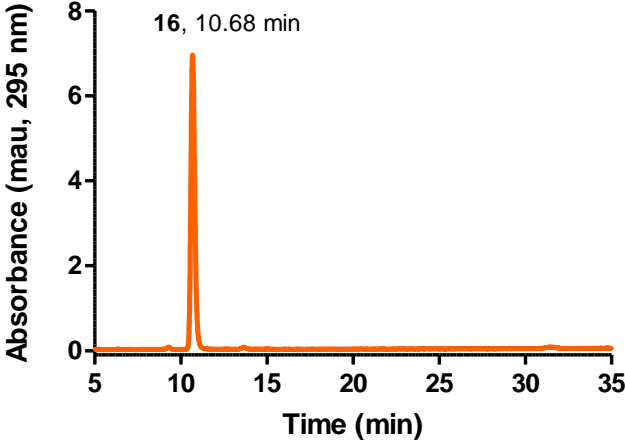

Chromatogram of 40 h LAP-treated (0.5 U) compound 16 (Method 3)

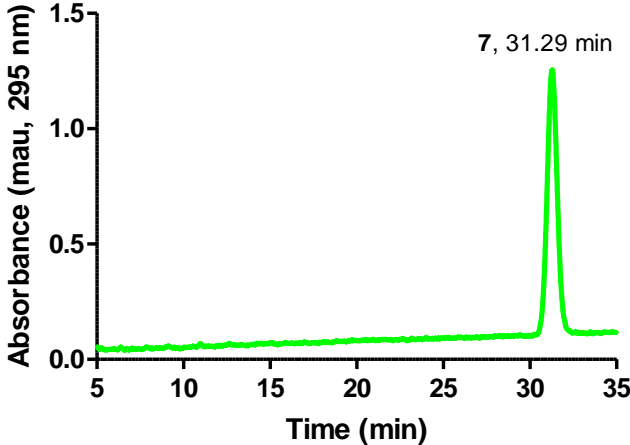

## HPLC Chromatograms of Compounds 8, 22, 23 and 24

Chromatogram of 40  $\mu$ M Each of Compounds 8 and 22 (Method 3)

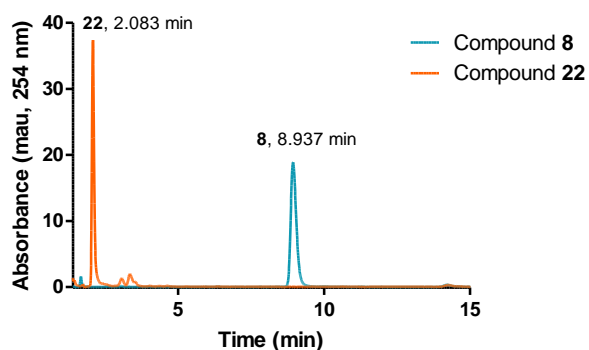

[Note: Retention times of compounds 8 and 22 were determined separately as standards in HPLC with the same mobile phase. The chromatograms were combined for comparison purposes.]

Chromatogram of 20  $\mu$ M Each of Compounds 8 and 23 (Method 3)

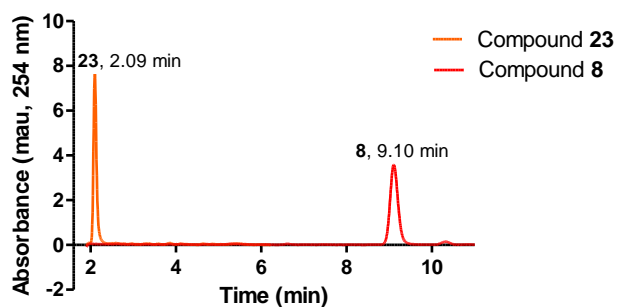

[Note: Retention times of compounds 8 and 23 were determined separately as standards in HPLC with the same mobile phase. The chromatograms were combined for comparison purposes.]

Chromatogram of 20  $\mu$ M Each of Compounds 8 and 24 (Method 3)

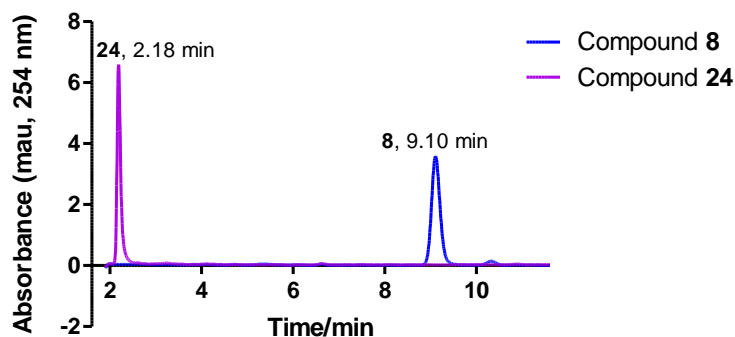

[Note: Retention times of compounds 8 and 24 were determined separately as standards in HPLC with the same mobile phase. The chromatograms were combined for comparison purposes.]

HPLC Chromatograms of Compounds 22 and 23 After Leucine Aminopeptidase Digestion

**Chromatogram of 40 h LAP-treated (1.5 U)  
compound 22: No cleavage observed (Method 3)**

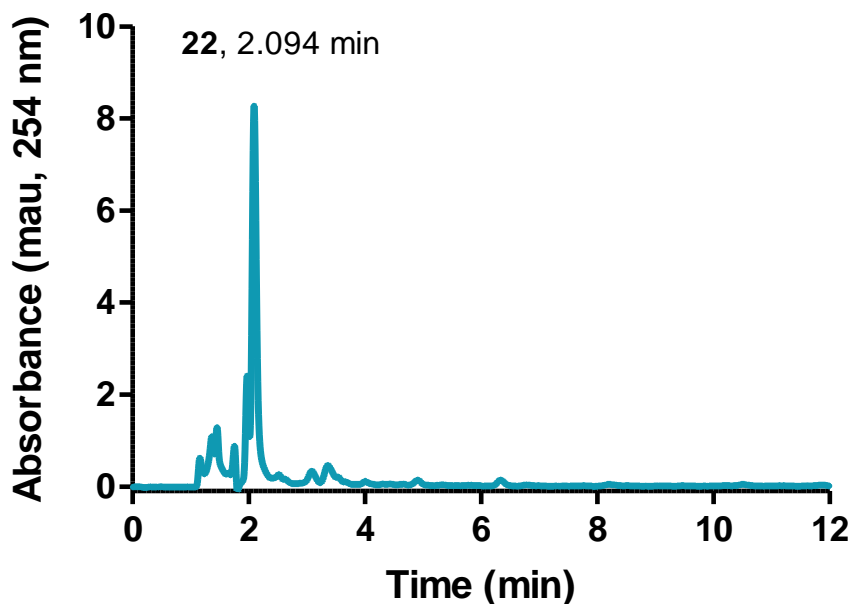

**Chromatogram of 40 h LAP-treated (1.5 U)  
compound 23 : No cleavage observed (Method 3)**

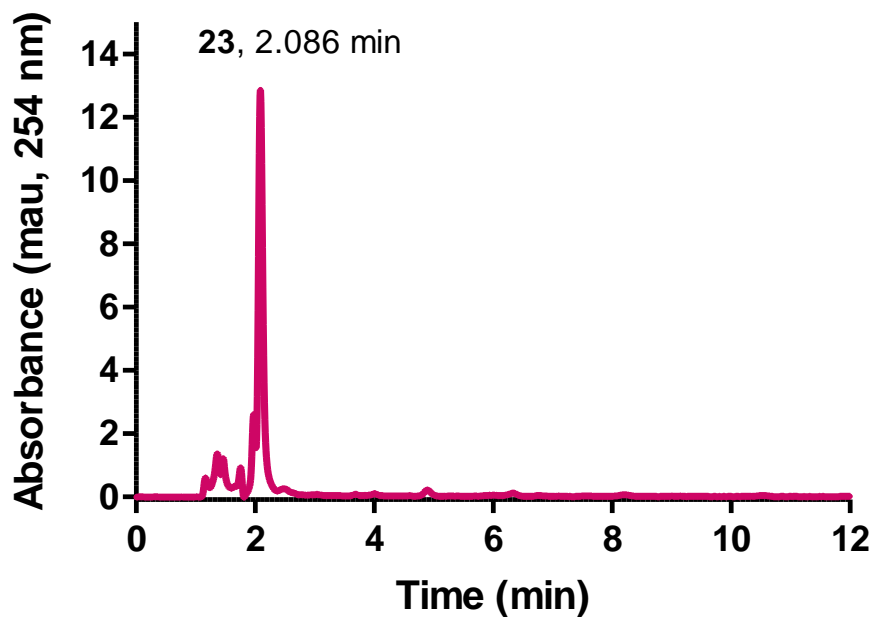

## HPLC Chromatograms of Compound 24 After Leucine Aminopeptidase Digestion

Chromatogram of LAP-treated (0.12 U) compound 24 incubated for 3 h (Method 3)

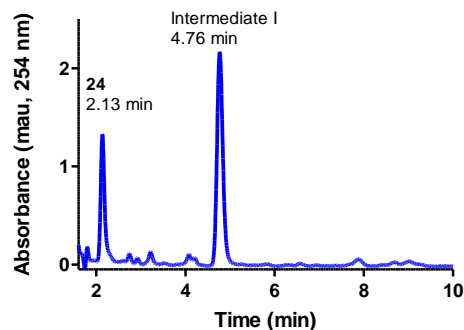

Chromatogram of LAP-treated (0.12 U) compound 24 incubated for 7 h (Method 3)

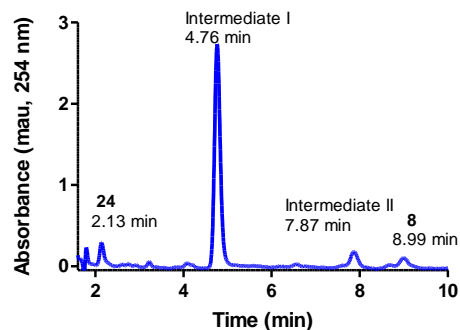

Chromatogram of LAP-treated (0.12 U) compound 24 incubated for 10 h (Method 3)

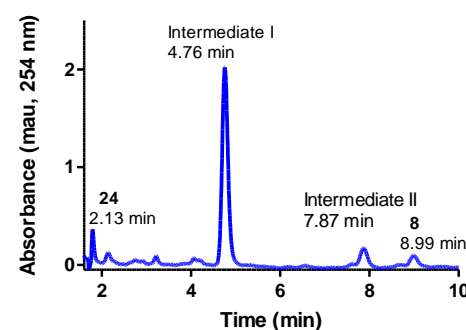

Chromatogram of LAP-treated (0.12 U) compound 24 incubated for 25 h (Method 3)

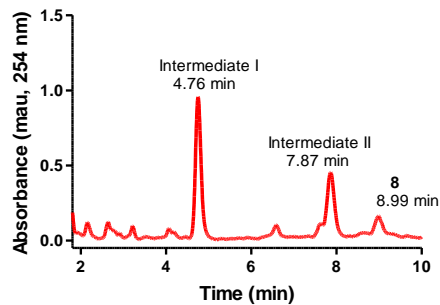

Chromatogram of LAP-treated (1.5 U) compound 24 incubated for 20 h (Method 3)

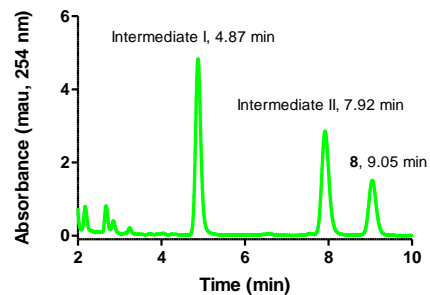

Chromatogram of LAP-treated (3.7 U) compound 24 incubated for 20 h (Method 3)

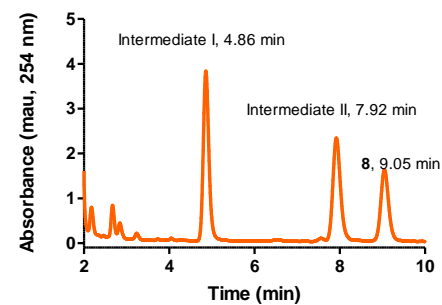

## HPLC Chromatograms of Compounds 17, 18 and of Their Parent Compound

### Chromatogram of 40 $\mu$ M Each of Compounds 17 and 18 and of Their Parent Compound (Method 3)

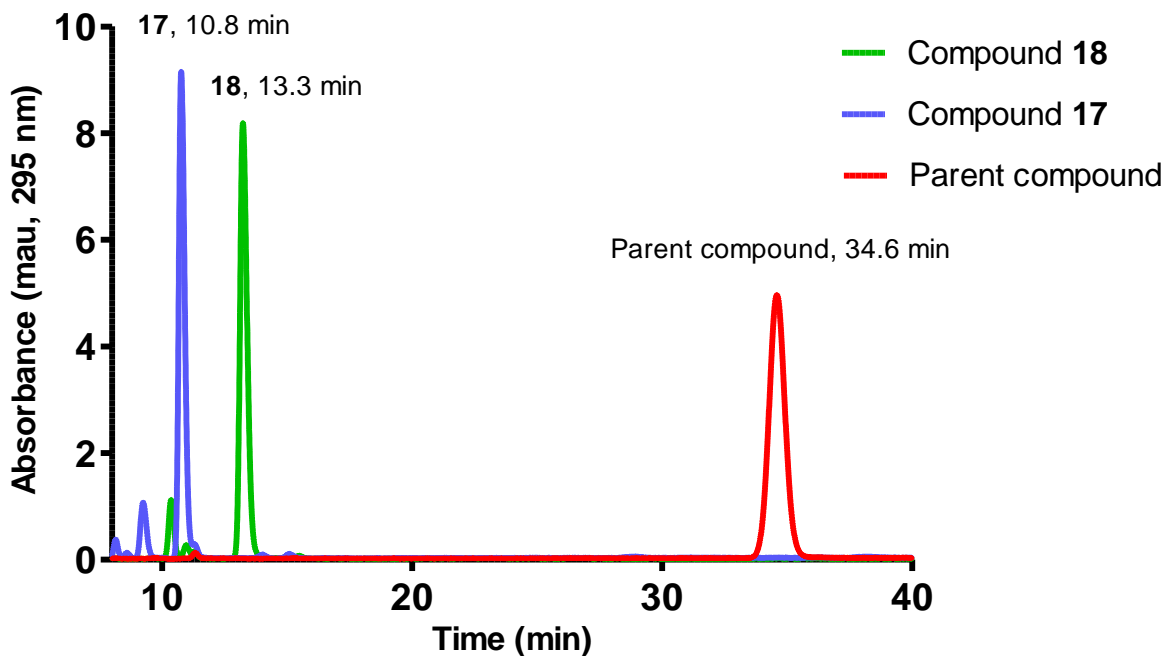

[Note: Retention times of compounds 17 and 18 and of their parent compound were determined separately as standards in HPLC with the same mobile phase. The chromatograms were combined for comparison purposes.]

## HPLC Chromatograms of Compounds 17 and 18 Before and After Leucine Aminopeptidase Digestion

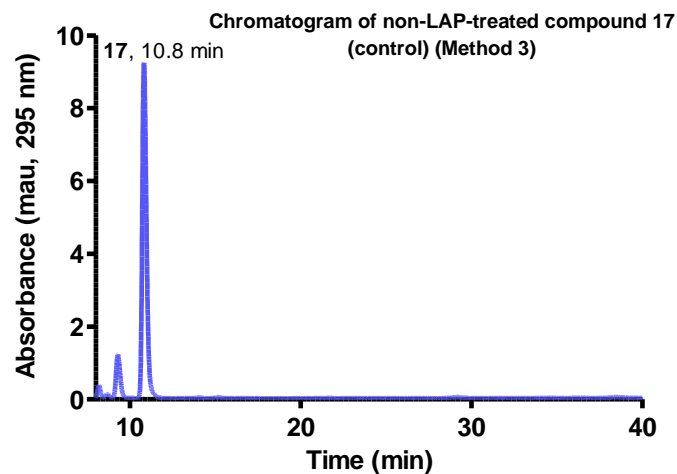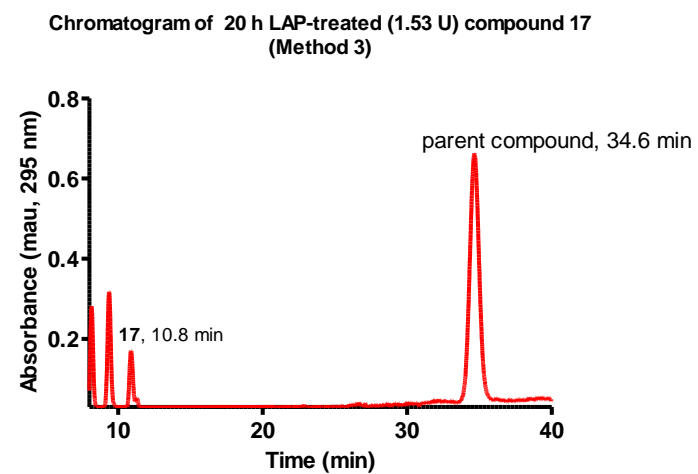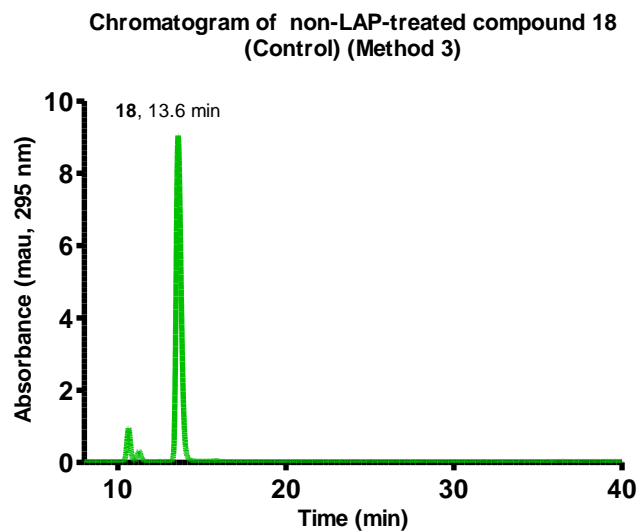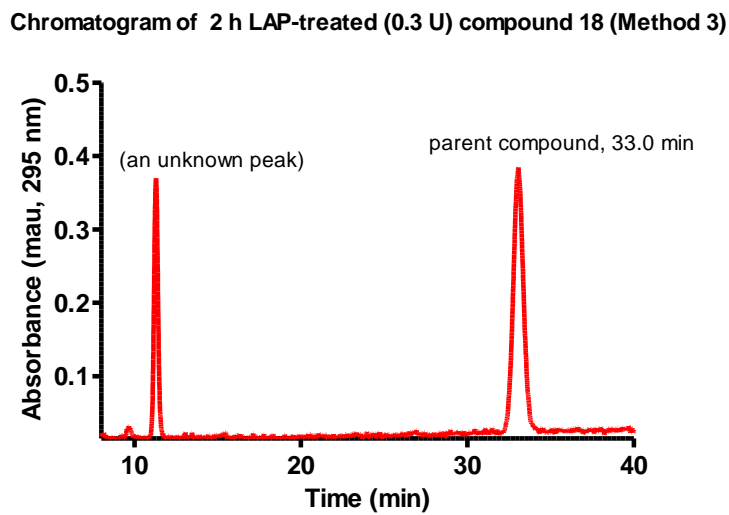



## HPLC Chromatograms of Compounds 32, 38 and 44

### Chromatogram of Compounds 32 and 38 (Method 1)

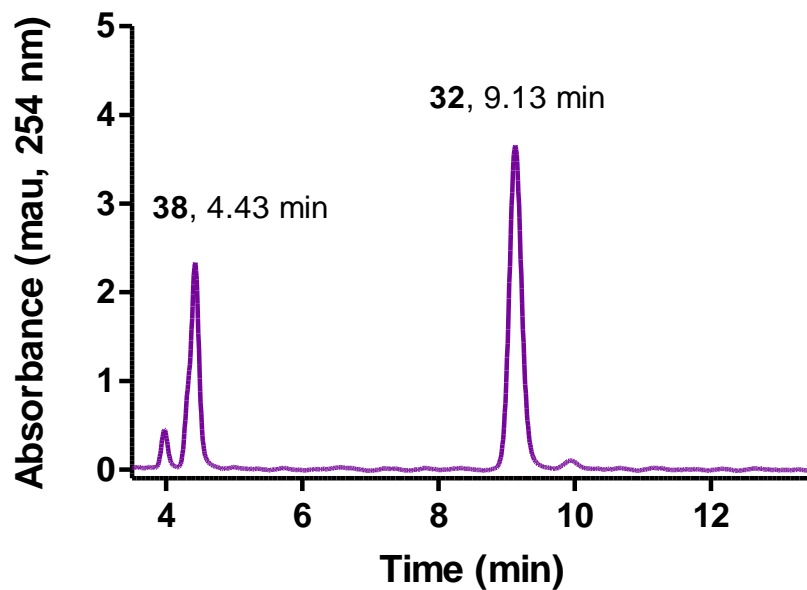

### Chromatogram of Compounds 32 and 44 (Method 2)

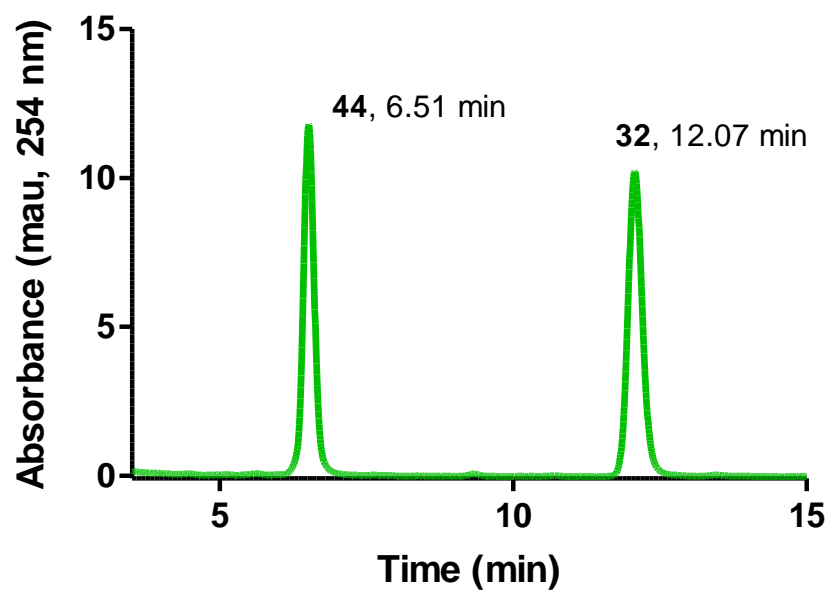

## HPLC Chromatograms of Compounds 38 and 44 Before and After Leucine Aminopeptidase Digestion

Chromatogram of 24 h non-LAP-treated compound 38 (Control) (Method 1)

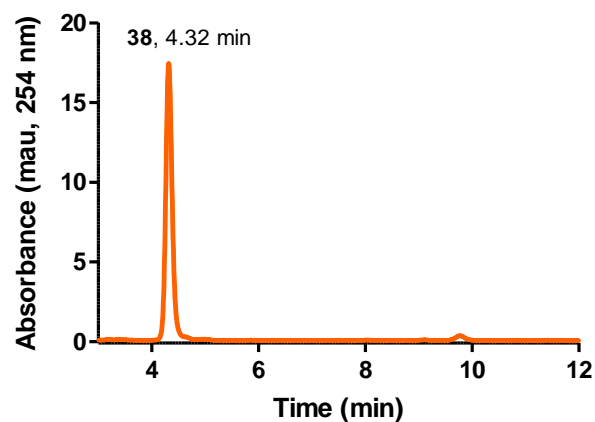

Chromatogram of 24 h Calzyme LAP-treated (3.6 U) compound 38 (Method 1)

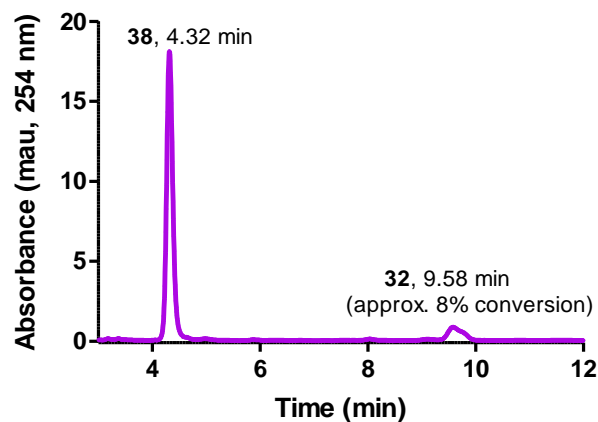

Chromatogram of 2 h non-LAP-treated compound 44 (Control) (Method 2)

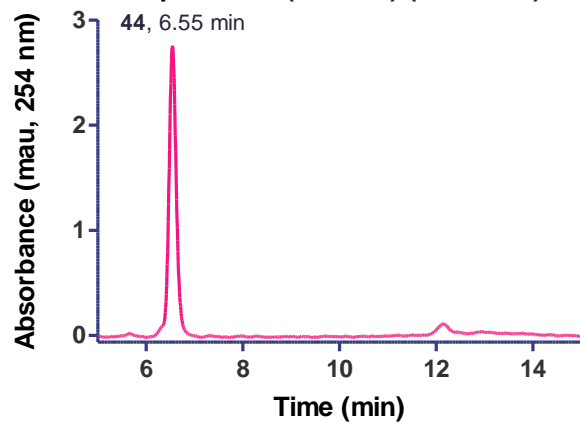

Chromatogram of 2 h LAP-treated (0.05 U) compound 44 (Method 2)

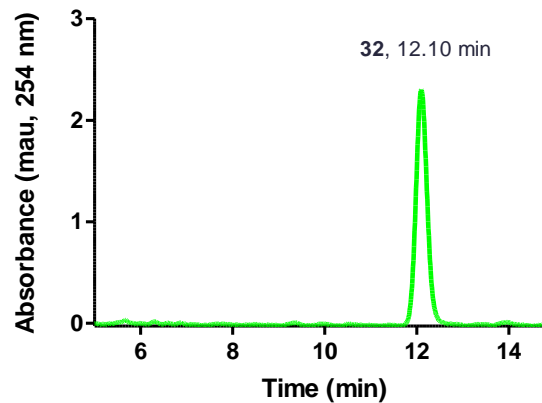

## HPLC Chromatograms of Compounds 33, 39 and 45

### Chromatogram of 20 $\mu$ M Each of Compounds 33 and 39 (Method 1)

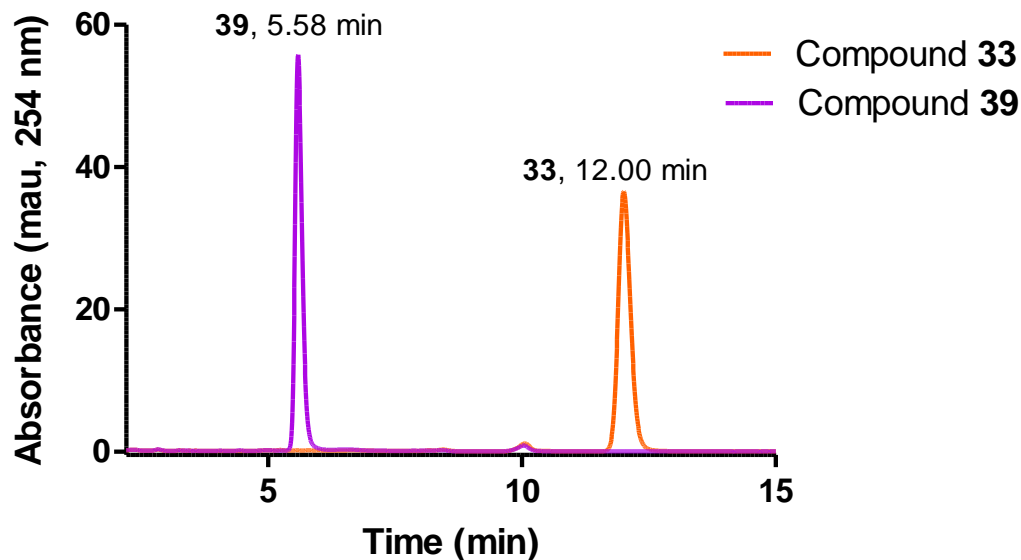

[Note: Retention times of compounds 33 and 39 were determined separately as standards in HPLC with the same mobile phase. The chromatograms were combined for comparison purposes.]

### Chromatogram of 20 $\mu$ M Each of Compounds 33 and 45 (Method 1)

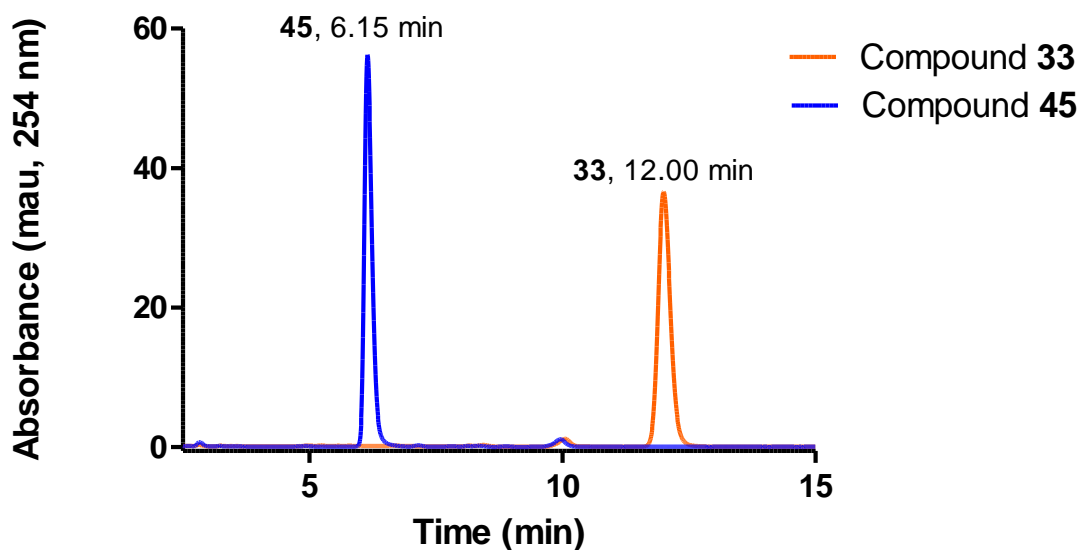

[Note: Retention times of compounds 33 and 45 were determined separately as standards in HPLC with the same mobile phase. The chromatograms were combined for comparison purposes.]

# HPLC Chromatograms of Compounds 39 and 45 Before and After Leucine Aminopeptidase Digestion

Chromatogram of 48 h non-LAP-treated compound 39 (Control) (Method 1)

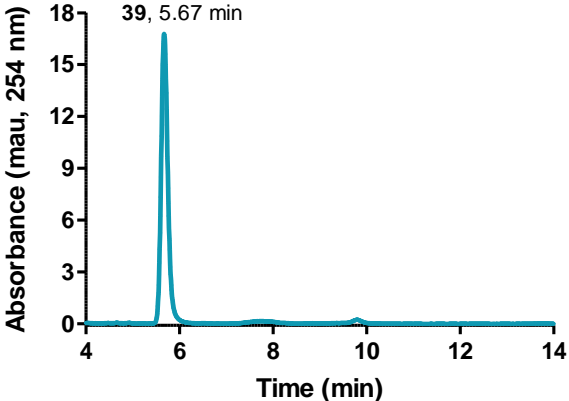

Chromatogram of 48 h LAP-treated (3.6 U) compound 39 (Method 1)

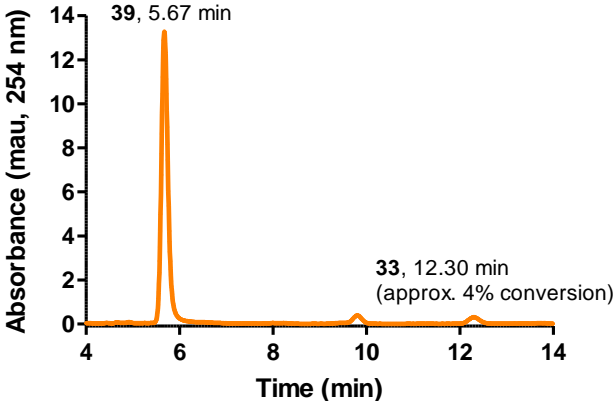

Chromatogram of 3 h non-LAP-treated Compound 45 (Control) (Method 1)

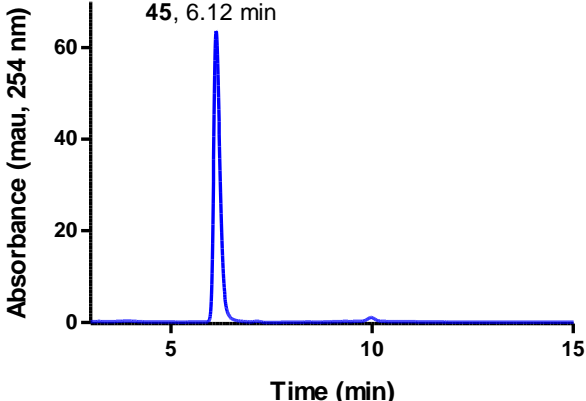

Chromatogram of 3 h LAP-treated (0.2 U) Compound 45 (Method 1)

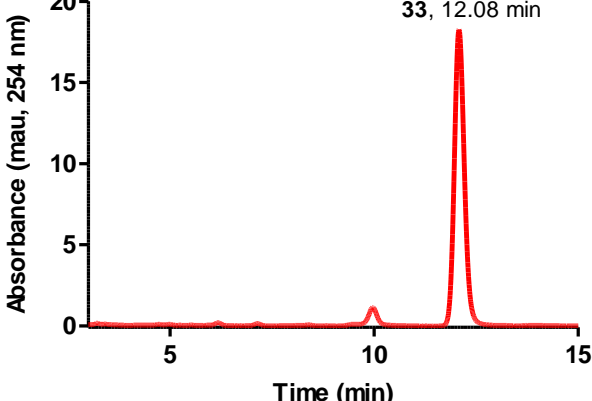

# HPLC Chromatograms of 3' CA4-amine, 3' CA4-*L*-serinamide and AVE8062

Chromatogram of 40  $\mu$ M Standard 3' CA4-amine (Method 1)

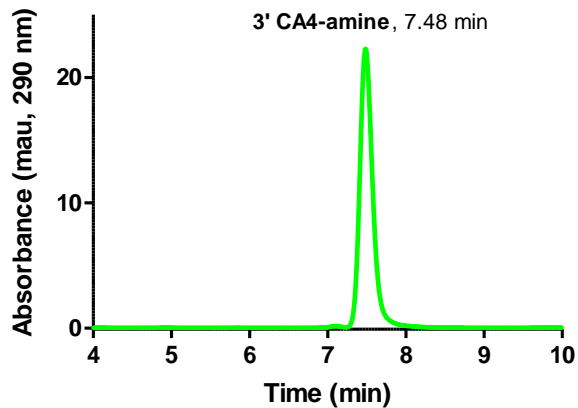

Chromatogram of 40  $\mu$ M Standard 3' CA4-*L*-serinamide (Method 1)

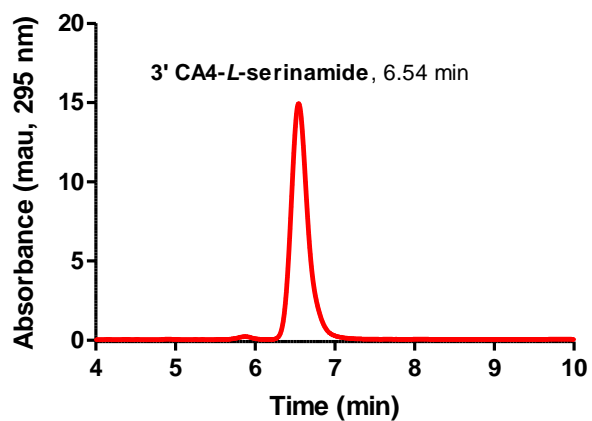

Chromatogram of 40  $\mu$ M Standard AVE8062 (Method 1)

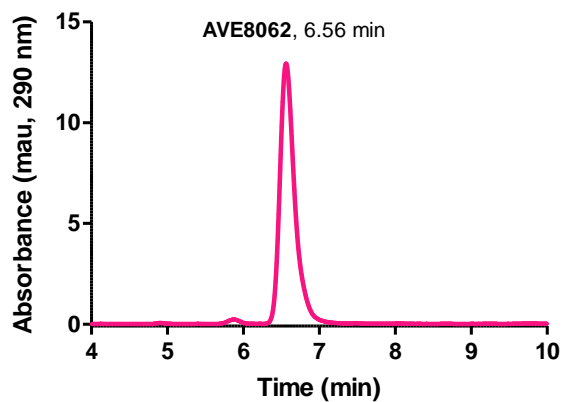

## HPLC Chromatograms of 3' CA4-L-serinamide and AVE8062 Before and After Leucine Aminopeptidase Digestion

Chromatogram of 48 h non-LAP-treated 3' CA4-L-serinamide (Control) (Method 1)

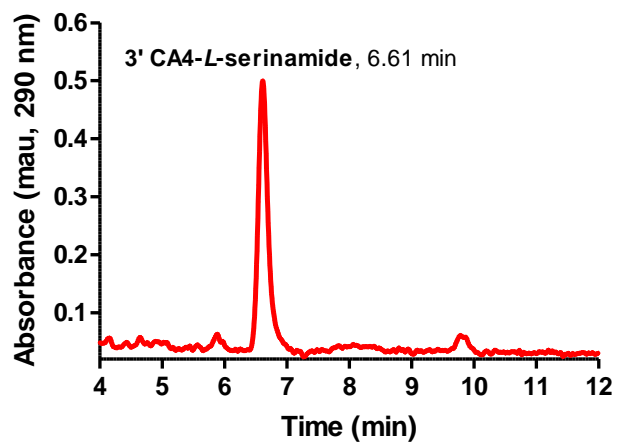

Chromatogram of 48 h LAP-treated (3.8 U) 3' CA4-L-serinamide (Method 1)

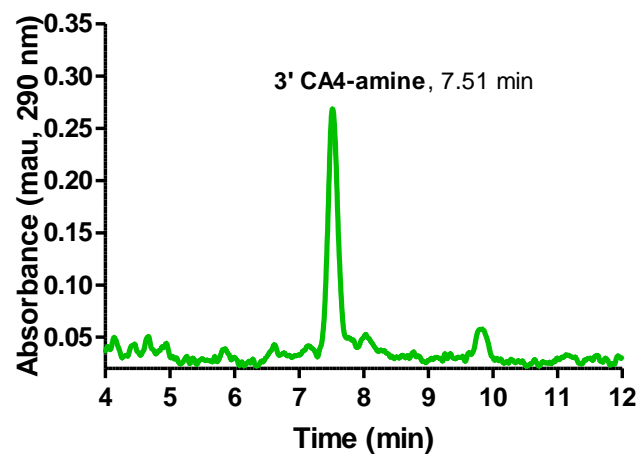

Chromatogram of 24 h non-LAP-treated AVE8062 (Control) (Method 1)

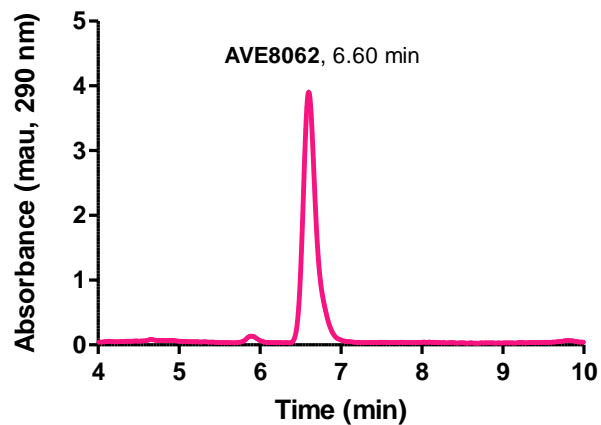

Chromatogram of 24 h LAP-treated (3.7 U) AVE8062 (Method 1)

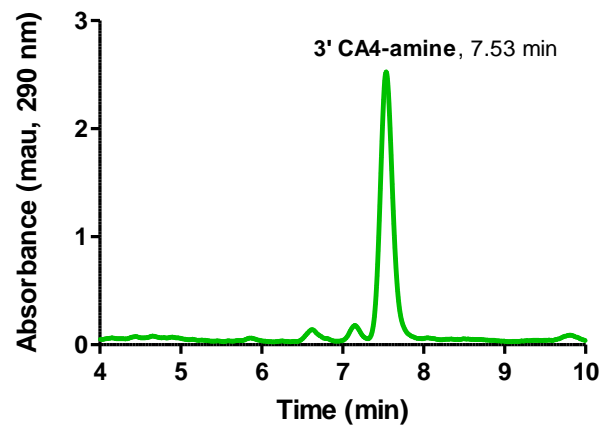

## Calibration Curves of Parent Compounds 7, 8, 32 and 33

Calibration Curve of Compound 7

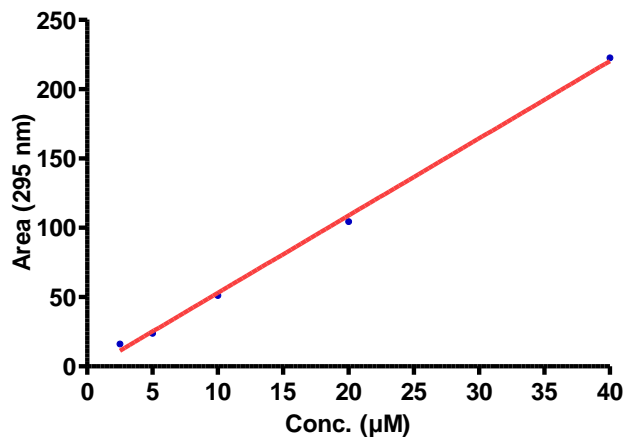

Calibration Curve of Compound 8

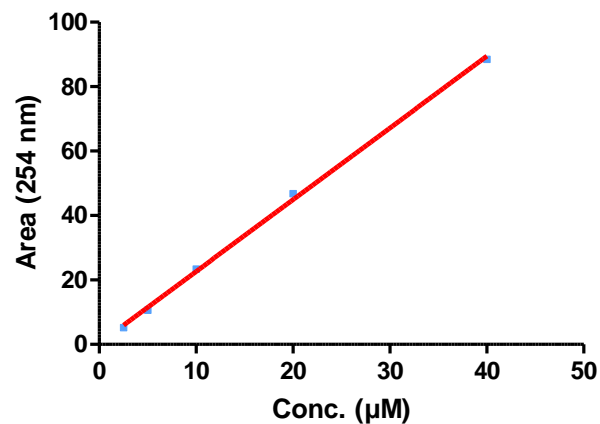

Calibration Curve of Compound 32

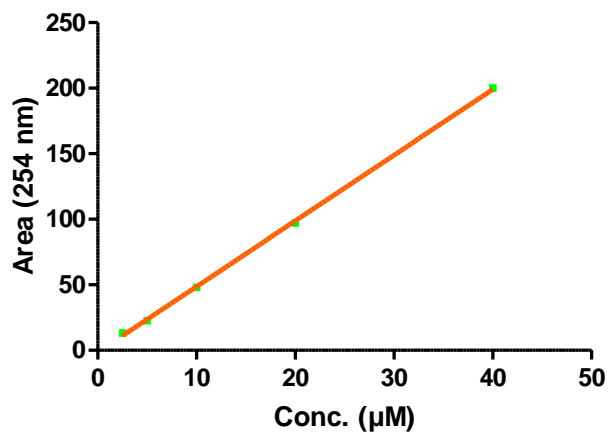

Calibration Curve of Compound 33

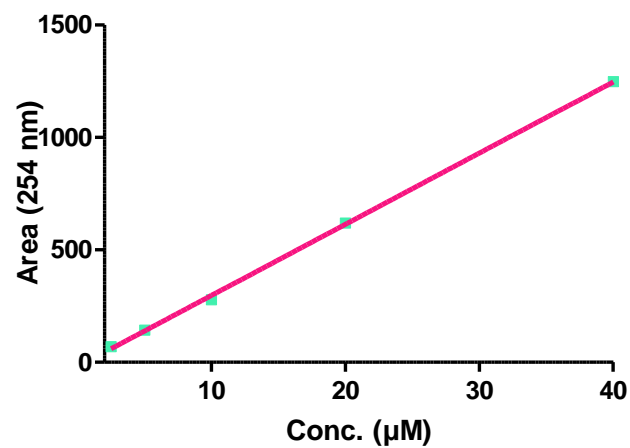

## Rate Studies for Cleavable Compounds 15, 16, 17, 18, 44 and 45

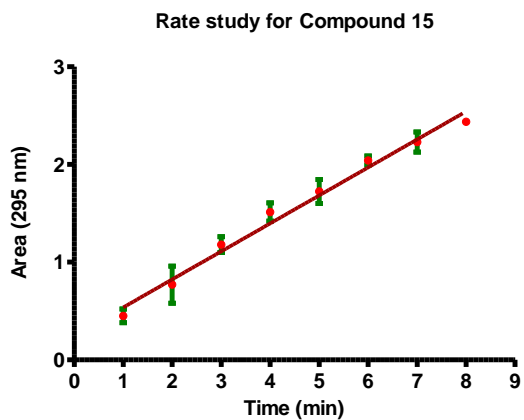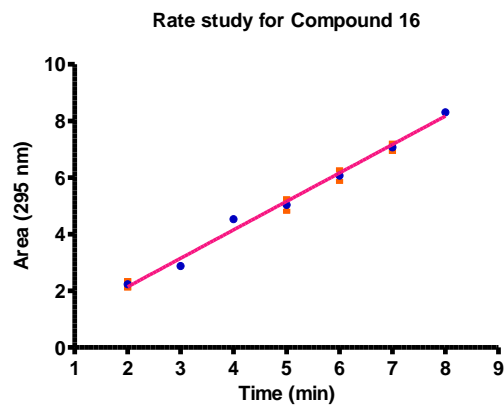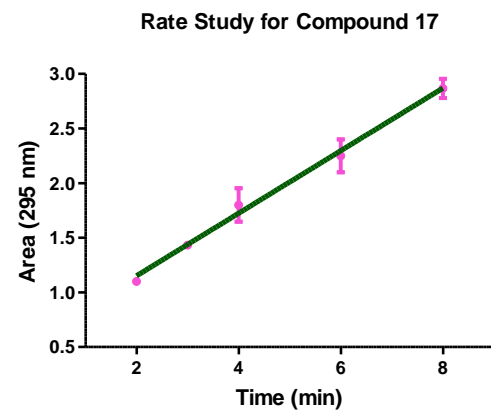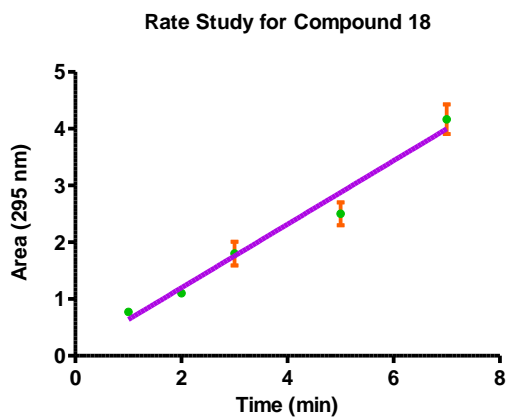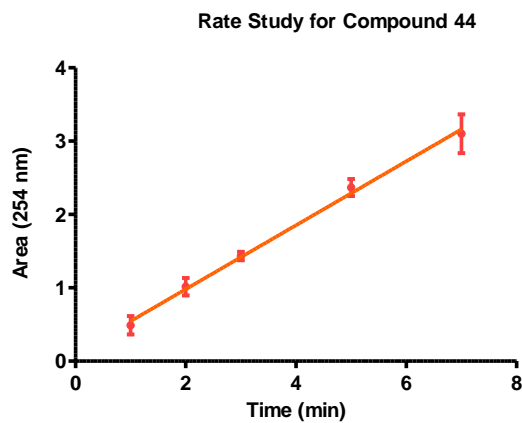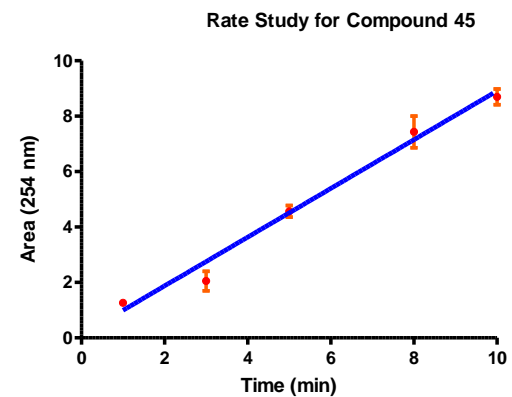



## Evaluation of Aqueous Solubility

A preliminary evaluation of the water solubility of two sets of the most promising parent drugs and their respective prodrug conjugates (as representative examples) was carried out, which utilized solution cloudiness (as evidenced by visual examination with the naked eye) as the transition between soluble and non-soluble.

Compound **7** (parent drug): 0.29 mg of compound **7** was weighed out in a vial and 580  $\mu\text{L}$  of DI water was added in several sequential aliquots. Only partial solubility of compound **7** in water was observed even at the lowest concentration, thus aqueous solubility was  $< 0.5$  g/L. Compound **16** (prodrug of compound **7**): 0.57 mg of prodrug **16** was weighed out in a vial, and upon the addition of a total of 90  $\mu\text{L}$  of DI water (added in several aliquots), the solution remained cloudy. Upon the addition of a total of 190  $\mu\text{L}$  of DI water, complete solubility of prodrug **16** was achieved. Thus, the calculated approximate solubility of prodrug **16** in water was 3 g/L.

Compound **32** (parent drug): 0.24 mg of compound **32** was weighed out in a vial and 480  $\mu\text{L}$  of DI water was added (in several aliquots). Only a partial solubility of compound **32** in water was observed even at the lowest concentration, thus aqueous solubility was  $< 0.5$  g/L. Compound **44** (prodrug of compound **32**): 0.54 mg of prodrug **44** was weighed out in a vial. Upon the addition of a total of 120  $\mu\text{L}$  of DI water, complete solubility of prodrug **44** was observed. Thus, the calculated approximate solubility of prodrug **44** in water was 4.5 g/L.
